# Supplementary material for: Systems-Level Interactome Mapping Reveals Actionable Protein Network Dysregulation Across the Alzheimer's Disease Spectrum
Source: Research Square preprint supplement (doi:10.21203/rs.3.rs-5930673/v1), 2025-02-12
Supplement: Supplementary file 1 [file 186887d5d0508d6fbca0b3c5.xlsx]

## Sheet: ALL
Protein IDs	Number of proteins	Protein names	Gene names	Fasta headers	Intensity 1 AD F	Intensity 2 AD F	Intensity 5 AD F	Intensity 11 AD F	Intensity 17 AD F	Intensity 49 AD F	Intensity 50 AD F	Intensity 52 AD F	Intensity 55 AD F	Intensity 96 AD F	Intensity 148 AD F	Intensity 185 AD F	Intensity 187 AD F	Intensity 188 AD F	Intensity 189 AD F	Intensity 191 AD F	Intensity 192 AD F	Intensity 201 AD F	Intensity 206 AD F	Intensity 214 AD F	Intensity 243 AD F	Intensity 244 AD F	Intensity 4 AD M	Intensity 15 AD M	Intensity 26 AD M	Intensity 54 AD M	Intensity 57 AD M	Intensity 202 AD M	Intensity 204 AD M	Intensity 205 AD M	Intensity 209 AD M	Intensity 211 AD M	Intensity 213 AD M	Intensity 126 MCI F	Intensity 160 MCI F	Intensity 276 MCI F	Intensity 325 MCI F	Intensity 328 MCI F	Intensity 422 MCI F	Intensity 29 MCI M	Intensity 124 MCI M	Intensity 161 MCI M	Intensity 326 MCI M	Intensity 7 NCI F	Intensity 13 NCI F
P04217;M0R009	3	Alpha-1B-glycoprotein	A1BG	sp|P04217|A1BG_HUMAN Alpha-1B-glycoprotein OS=Homo sapiens OX=9606 GN=A1BG PE=1 SV=4;tr|M0R009|M0R009_HUMAN Isoform of P04217, Alpha-1B-glycoprotein (Fragment) OS=Homo sapiens OX=9606 GN=A1BG PE=1 SV=8	0	105650000	4235600	8620300	24193000	112630	1764100	2422100	0	189670	2080800	3816000	0	58955000	7797300000	16100000	0	0	395450000	8980700	0	4959900	11620000	0	0	0	8483200	24183000	5054900	68551000	0	10121000	70671000	462390000	5021400	4309600	5032300	265290000	0	22594000	10741000	4616600	0	364880000	1063500
P01023	4	Alpha-2-macroglobulin	A2M	sp|P01023|A2MG_HUMAN Alpha-2-macroglobulin OS=Homo sapiens OX=9606 GN=A2M PE=1 SV=3	74643000000	31332000000	15827000000	30886000000	9020800000	6232600000	13724000000	20308000000	16564000000	24072000000	13660000000	33727000000	19432000000	91427000000	41322000000	16663000000	8277700000	9227100000	87962000000	11536000000	4296200000	24210000000	30265000000	17604000000	11532000000	10522000000	6273600000	39241000000	5856600000	69686000000	81613000000	2337300000	50479000000	47453000000	4150000000	9079200000	5143100000	53860000000	20578000000	7971500000	25288000000	15969000000	5487500000	9003200000	9104200000
A8K2U0;H0YGG5;A8K2U0-2	4	Alpha-2-macroglobulin-like protein 1	A2ML1	sp|A8K2U0|A2ML1_HUMAN Alpha-2-macroglobulin-like protein 1 OS=Homo sapiens OX=9606 GN=A2ML1 PE=1 SV=3;tr|H0YGG5|H0YGG5_HUMAN Isoform of A8K2U0, Alpha-2-macroglobulin-like protein 1 (Fragment) OS=Homo sapiens OX=9606 GN=A2ML1 PE=1 SV=1;sp|A8K2U0-2|A2ML1-2_H	251360000	132720000	275840000	107790000	398370000	37481000	88890000	82396000	20198000	321830000	140240000	68095000	2063000000	9946600000	294010000	188240000	42934000	27960000	566440000	126420000	15948000	241930000	112230000	209790000	657520000	712250000	254220000	502560000	7691200	797540000	4175800000	14831000	520790000	829940000	4045200000	902480000	432490000	2188900000	3497900000	20129000	296840000	782930000	165320000	4975100000	96220000
Q8N5Z0;Q8N5Z0-2	4	Kynurenine/alpha-aminoadipate aminotransferase, mitochondrial	AADAT	sp|Q8N5Z0|AADAT_HUMAN Kynurenine/alpha-aminoadipate aminotransferase, mitochondrial OS=Homo sapiens OX=9606 GN=AADAT PE=1 SV=2;sp|Q8N5Z0-2|AADAT-2_HUMAN Isoform of Q8N5Z0, Isoform 2 of Kynurenine/alpha-aminoadipate aminotransferase, mitochondrial OS=Homo s	76664000	43508000	614560000	84917000	5681300	4398300	0	145400000	11307000	44370000	48180000	116610000	83529000	119180000	127750000	38705000	43698000	5697600	167150000	40592000	2187800	77336000	8835200	29375000	569070000	79085000	28310000	69112000	1308800	67577000	565890000	935400	35772000	60665000	125600000	94768000	36768000	781320000	41209000	50903000	341940000	197640000	137990000	128950000	50844000
Q2M2I8;Q2M2I8-2;E9PG46	4	AP2-associated protein kinase 1	AAK1	sp|Q2M2I8|AAK1_HUMAN AP2-associated protein kinase 1 OS=Homo sapiens OX=9606 GN=AAK1 PE=1 SV=3;sp|Q2M2I8-2|AAK1-2_HUMAN Isoform of Q2M2I8, Isoform 2 of AP2-associated protein kinase 1 OS=Homo sapiens OX=9606 GN=AAK1 PE=1 SV=3;tr|E9PG46|E9PG46_HUMAN Isoform	24705000	6516700000	11370000	187040000	14723000	198770000	108830000	34937000	57771000	400620000	123610000	27403000	834790000	1074700000	71416000	407580000	82384000	60077000	48561000	12762000	9581800	40641000	66587000	174870000	2167500000	29283000	141310000	82462000	5284700	59549000	116120000	38209000	408240000	400060000	206200000	35154000	226310000	2123900000	138980000	98556000	197400000	103610000	510590000	296330000	265690000
C9JG97;C9JEH3;Q13685;C9JTS3	4	Angio-associated migratory cell protein	AAMP	tr|C9JG97|C9JG97_HUMAN Isoform of Q13685, Angio-associated migratory cell protein OS=Homo sapiens OX=9606 GN=AAMP PE=1 SV=1;tr|C9JEH3|C9JEH3_HUMAN Isoform of Q13685, Angio-associated migratory cell protein OS=Homo sapiens OX=9606 GN=AAMP PE=1 SV=1;sp|Q1368	8726900000	19650000	0	44526000	293520	42382000	3070100	30127000	857070	21910000	52329000	880910	86282000	9722900000	5914900	16573000	707340000	54657000	125050000	18403000	68014000	37843000	27475000	25849000	455850000	14197000	178450000	8694600	0	5197000	94953000	0	93414000	89062000	1035000000	113990000	243360000	109700000	335670000	35655000	117030000	26782000	78889000	19235000	12806000
P49588;P49588-2	3	Alanine--tRNA ligase, cytoplasmic	AARS	sp|P49588|SYAC_HUMAN Alanine--tRNA ligase, cytoplasmic OS=Homo sapiens OX=9606 GN=AARS PE=1 SV=2;sp|P49588-2|SYAC-2_HUMAN Isoform of P49588, Isoform 2 of Alanine--tRNA ligase, cytoplasmic OS=Homo sapiens OX=9606 GN=AARS PE=1 SV=2	2303300000	6311400000	512750000	3993100000	2486800000	734360000	468650000	1801500000	1697300000	2112300000	2613900000	2246400000	5929900000	2551900000	4107300000	5355600000	3023200000	1369500000	8044000000	758200000	718290000	4524600000	1259600000	2532400000	3387100000	6244600000	4165900000	1767300000	477730000	2310800000	10352000000	338720000	6152100000	2841300000	1492400000	5903600000	6121800000	22543000000	6095700000	4007200000	4049700000	8121600000	6079300000	8830000000	2582900000
Q9NRN7;E9PLW6	4	L-aminoadipate-semialdehyde dehydrogenase-phosphopantetheinyl transferase	AASDHPPT	sp|Q9NRN7|ADPPT_HUMAN L-aminoadipate-semialdehyde dehydrogenase-phosphopantetheinyl transferase OS=Homo sapiens OX=9606 GN=AASDHPPT PE=1 SV=2;tr|E9PLW6|E9PLW6_HUMAN Isoform of Q9NRN7, L-aminoadipate-semialdehyde dehydrogenase-phosphopantetheinyl transferas	169330000	193270000	47571000	149350000	115690000	100310000	40513000	88811000	0	243530000	76571000	385520000	142300000	550640000	102130000	549830000	72157000	34756000	462960000	9604700	28459000	689420000	126240000	127080000	83212000	2182900000	121770000	110800000	8181500	644550000	1442200000	14131000	535990000	52263000	44644000	189370000	171780000	288490000	216130000	15092000	139030000	474230000	139060000	1060600000	135820000
Q9UDR5;F8WAH1;F8WE53	3	Alpha-aminoadipic semialdehyde synthase, mitochondrial;Lysine ketoglutarate reductase;Saccharopine dehydrogenase	AASS	sp|Q9UDR5|AASS_HUMAN Alpha-aminoadipic semialdehyde synthase, mitochondrial OS=Homo sapiens OX=9606 GN=AASS PE=1 SV=1;tr|F8WAH1|F8WAH1_HUMAN Isoform of Q9UDR5, Alpha-aminoadipic semialdehyde synthase, mitochondrial OS=Homo sapiens OX=9606 GN=AASS PE=1 SV=1	844950000	1729100000	53591000	2146600000	2698800000	820030000	654010000	976160000	458940000	1326200000	674570000	2199600000	1693400000	8796500000	4408700000	719330000	172340000	118580000	9593500000	158260000	49764000	1055800000	1318100000	1655600000	803490000	1125000000	313320000	500430000	269130000	5526300000	4437700000	181590000	4550000000	3987600000	519370000	1568400000	731680000	2753600000	522300000	1395600000	1519500000	3560800000	399040000	454080000	866100000
H3BRN4;P80404;H3BNQ7	7	4-aminobutyrate aminotransferase, mitochondrial	ABAT	tr|H3BRN4|H3BRN4_HUMAN Isoform of P80404, 4-aminobutyrate aminotransferase, mitochondrial OS=Homo sapiens OX=9606 GN=ABAT PE=1 SV=1;sp|P80404|GABT_HUMAN 4-aminobutyrate aminotransferase, mitochondrial OS=Homo sapiens OX=9606 GN=ABAT PE=1 SV=3;tr|H3BNQ7|H3B	351120000	1519700000	108180000	91868000	162680000	24538000	14575000	159470000	8371800	153110000	48489000	164080000	193410000	829770000	400910000	224460000	228610000	6991200	899740000	36108000	2907300	59126000	217670000	83567000	67302000	138290000	97136000	273370000	387380	259030000	744360000	14980000	2400500000	149990000	268840000	281410000	55242000	520180000	503250000	173150000	55177000	414340000	180750000	8569300	220350000
O95477	1	ATP-binding cassette sub-family A member 1	ABCA1	sp|O95477|ABCA1_HUMAN ATP-binding cassette sub-family A member 1 OS=Homo sapiens OX=9606 GN=ABCA1 PE=1 SV=3	20878000	84291000	357740	202380000	14574000	99924000	0	0	0	24195000	13835000	16497000	578050000	105030000	214740000	809020000	34677000	547870	219430000	1376600	12404000	195310000	8176900	44385000	0	0	7059000	0	35748000	1030100000	190190000	0	40460000	430550000	858180000	373800000	117520000	134020000	545780000	27480000	20869000	155340000	48591000	0	62602000
Q86UK0;Q86UK0-2	2	ATP-binding cassette sub-family A member 12	ABCA12	sp|Q86UK0|ABCAC_HUMAN ATP-binding cassette sub-family A member 12 OS=Homo sapiens OX=9606 GN=ABCA12 PE=1 SV=3;sp|Q86UK0-2|ABCAC-2_HUMAN Isoform of Q86UK0, Isoform 2 of ATP-binding cassette sub-family A member 12 OS=Homo sapiens OX=9606 GN=ABCA12 PE=2 SV=3	104420000	318190000	12985000	113640000	47397000	374420000	6772400	38471000	4035000	244460000	47955000	6821900000	337780000	316940000	666580000	219830000	53902000	19916000	239850000	21320000	438700000	42835000	36302000	31068000	396950000	7344100000	19313000	1422600000	2024500	1178900000	551690000	29205000	3362600000	47435000	242730000	23047000	158130000	557120000	359430000	80594000	50390000	173330000	40043000	420570000	7175600
Q86UQ4;Q86UQ4-4;A0A0A0MT16;Q86UQ4-3	6	ATP-binding cassette sub-family A member 13	ABCA13	sp|Q86UQ4|ABCAD_HUMAN ATP-binding cassette sub-family A member 13 OS=Homo sapiens OX=9606 GN=ABCA13 PE=2 SV=3;sp|Q86UQ4-4|ABCAD-4_HUMAN Isoform of Q86UQ4, Isoform 4 of ATP-binding cassette sub-family A member 13 OS=Homo sapiens OX=9606 GN=ABCA13 PE=2 SV=3;	1251300000	2428300000	51844000	474430000	736880000	108990000	80750000	230930000	19430000	12548000000	205190000	217360000	194380000	877890000	18911000000	456390000	121160000	59161000	3525700000	463440000	174680000	2578700000	77013000	402200000	224470000	2976200000	462560000	2394900000	75791000	13008000000	31183000000	345390000	413290000	1007600000	928640000	310050000	6953600000	3917700000	205110000	333960000	1004100000	1125100000	8436900000	1911500000	649980000
A0A087WXK5;J3QSS3;Q9BZC7;Q9BZC7-3;Q9BZC7-2;E9PGB2	10	ATP-binding cassette sub-family A member 2	ABCA2	tr|A0A087WXK5|A0A087WXK5_HUMAN Isoform of Q9BZC7, ATP-binding cassette sub-family A member 2 OS=Homo sapiens OX=9606 GN=ABCA2 PE=1 SV=1;tr|J3QSS3|J3QSS3_HUMAN Isoform of Q9BZC7, ATP-binding cassette sub-family A member 2 OS=Homo sapiens OX=9606 GN=ABCA2 PE	170510000	159700000	23729000	98424000	98959000	23075000	21288000	599540000	2599200	952480000	136510000	762330000	751870000	1312700000	566850000	152750000	124160000	63669000	819550000	24571000	34720000	523430000	55416000	22882000	219040000	666840000	130980000	239950000	138030000	2125500000	1983600000	7828900	1033500000	740530000	54393000	310020000	339300000	303270000	535660000	357210000	350200000	697990000	217060000	30022000	188580000
H0Y3H2;Q99758	2	ATP-binding cassette sub-family A member 3	ABCA3	tr|H0Y3H2|H0Y3H2_HUMAN Isoform of Q99758, ATP-binding cassette sub-family A member 3 OS=Homo sapiens OX=9606 GN=ABCA3 PE=1 SV=1;sp|Q99758|ABCA3_HUMAN ATP-binding cassette sub-family A member 3 OS=Homo sapiens OX=9606 GN=ABCA3 PE=1 SV=2	58948000	193090000	2002700	200280000	23674000	34246000	18683000	67967000	0	29032000	75378000	488990000	3499700000	427920000	458470000	16551000	52659000	33782000	9544800000	39843000	12154000	49798000	21994000	76343000	101090000	25479000	25895000	183280000	5981400	239480000	492310000	7080800	840360000	195290000	82558000	271490000	48895000	19978000000	157260000	27433000	515010000	72350000	257610000	18078000	16729000
Q8N139;Q8N139-3;Q8N139-2	3	ATP-binding cassette sub-family A member 6	ABCA6	sp|Q8N139|ABCA6_HUMAN ATP-binding cassette sub-family A member 6 OS=Homo sapiens OX=9606 GN=ABCA6 PE=1 SV=2;sp|Q8N139-3|ABCA6-3_HUMAN Isoform of Q8N139, Isoform 3 of ATP-binding cassette sub-family A member 6 OS=Homo sapiens OX=9606 GN=ABCA6 PE=1 SV=2;sp|Q	61077000	11067000	0	0	0	0	2767200	3027900	0	0	56386000	0	155300000	37700000	33426000	0	0	0	54682000	3350800	2254600	10258000	23216000	7268800	44115000	2556300	0	33225000	1282700	49008000	18247000	0	32574000	38289000	59319000	336860000	2447700	490230000	384440000	0	0	15160000	0	0	0
A0A0A0MSU4;O94911-3;O94911;A0A075B774	6	ATP-binding cassette sub-family A member 8	ABCA8	tr|A0A0A0MSU4|A0A0A0MSU4_HUMAN Isoform of O94911, ATP-binding cassette sub-family A member 8 OS=Homo sapiens OX=9606 GN=ABCA8 PE=1 SV=1;sp|O94911-3|ABCA8-3_HUMAN Isoform of O94911, Isoform 3 of ATP-binding cassette sub-family A member 8 OS=Homo sapiens OX=	829230000	34860000	1395800	48229000	4113200	927470	4511700	19834000	0	55117000	0	8227300	103220000	100150000	809990	45260000	8127600	4027900	107050000	0	1338600	16730000	889380	4840100	0	20890000	5478500	20315000	0	340770000	108290000	0	99973000	28305000	6356800	14717000	106160000	12011000	6832900	8179000	29776000	972890000	0	0	1818400
P08183;P08183-2	2	Multidrug resistance protein 1	ABCB1	sp|P08183|MDR1_HUMAN Multidrug resistance protein 1 OS=Homo sapiens OX=9606 GN=ABCB1 PE=1 SV=3;sp|P08183-2|MDR1-2_HUMAN Isoform of P08183, Isoform 2 of Multidrug resistance protein 1 OS=Homo sapiens OX=9606 GN=ABCB1 PE=1 SV=3	109300000	17427000	22213000	51753000	16498000	7858700	11116000	33191000	4034500	32544000	14326000	14614000	132480000	183450000	233430000	314210000	45662000	37683000	166960000	28580000	3183300	25709000	31138000	19410000	23507000	3693300	28949000	24315000	1535200	3339600000	434370000	9113000	77338000	239280000	13682000	39512000	70098000	281030000	587500000	5986200	119570000	171620000	19181000	177310000	13423000
O95342	3	Bile salt export pump	ABCB11	sp|O95342|ABCBB_HUMAN Bile salt export pump OS=Homo sapiens OX=9606 GN=ABCB11 PE=1 SV=2	1224200000	22953000	901420	106860000	3887900	73726000	4378700	67282000	14349000	58103000	1801700000	0	72814000	184810000	212300000	147320000	31021000	6050900	146910000	18570000	404080000	102280000	3395600	1125700000	26109000	96919000	9580800	18908000	12776000	197930000	214940000	483980000	102670000	412200000	348440000	0	54018000	29383000	107510000	1182100	305560000	22541000	58407000	245050000	11141000
H7BXK9;Q9NP58-4;Q9NP58	3	ATP-binding cassette sub-family B member 6, mitochondrial	ABCB6	tr|H7BXK9|H7BXK9_HUMAN Isoform of Q9NP58, ATP-binding cassette sub-family B member 6, mitochondrial (Fragment) OS=Homo sapiens OX=9606 GN=ABCB6 PE=1 SV=1;sp|Q9NP58-4|ABCB6-4_HUMAN Isoform of Q9NP58, Isoform 2 of ATP-binding cassette sub-family B member 6,	84315000	16459000	1160200	16237000	6939100	25535000	48764000	57387000	0	250770000	27982000	181410000	111870000	858250000	95668000	63042000	2049800	12168000	1840200000	70984000	6773800	5174400	80395000	3983300	36688000	67135000	0	265320000	19481000	438380000	193180000	15061000	185840000	550170000	197350000	145310000	72780000	186740000	600000000	15827000	32703000	372260000	86084000	4288400	5257300
Q9NUT2-2;Q9NUT2;Q9NUT2-5;Q9NUT2-3	8	ATP-binding cassette sub-family B member 8, mitochondrial	ABCB8	sp|Q9NUT2-2|ABCB8-2_HUMAN Isoform of Q9NUT2, Isoform 2 of ATP-binding cassette sub-family B member 8, mitochondrial OS=Homo sapiens OX=9606 GN=ABCB8 PE=1 SV=3;sp|Q9NUT2|ABCB8_HUMAN ATP-binding cassette sub-family B member 8, mitochondrial OS=Homo sapiens O	38719000	276760000	8663100	50344000	2046300	0	871780	58554000	44982	3666600000	9041700	137610000	22721000	77685000	81689000	28363000	1704100	2207400	135960000	1747000	6742000	11729000	201690000	22215000	0	8920500	83690000	9710100	3751500	493120000	724710000	0	292230000	156630000	14984000	108530000	92096000	86683000	87250000	3739300	164910000	238610000	8865500	1445100	256710000
Q9NP78-2;Q6P2Q0;Q9NP78-6;Q9NP78-5;Q9NP78-7;Q9NP78;Q9NP78-3	11	ATP-binding cassette sub-family B member 9	ABCB9	sp|Q9NP78-2|ABCB9-2_HUMAN Isoform of Q9NP78, Isoform 2 of ATP-binding cassette sub-family B member 9 OS=Homo sapiens OX=9606 GN=ABCB9 PE=1 SV=1;tr|Q6P2Q0|Q6P2Q0_HUMAN Isoform of Q9NP78, ABCB9 protein OS=Homo sapiens OX=9606 GN=ABCB9 PE=1 SV=1;sp|Q9NP78-6|A	144700000	40659000	0	15763000	60451000	18055000	1691000	10780000	1651900	1854900000	203120000	142110000	117190000	205600000	0	46184000	361560000	9256300	278430000	3390100	4162700	14969000	3635000	32571000	2294900	16743000	20395000	12203000	2133200	163080000	135990000	11944000	77198000	8286500	57303000	19250000	33300000	37510000	83461000	19346000	94057000	21135000	5680400	32025000	5587800
Q96J65-3;Q96J65-2;Q96J65-5;Q96J65;Q96J65-4	6	Multidrug resistance-associated protein 9	ABCC12	sp|Q96J65-3|MRP9-3_HUMAN Isoform of Q96J65, Isoform 3 of Multidrug resistance-associated protein 9 OS=Homo sapiens OX=9606 GN=ABCC12 PE=2 SV=2;sp|Q96J65-2|MRP9-2_HUMAN Isoform of Q96J65, Isoform 2 of Multidrug resistance-associated protein 9 OS=Homo sapien	51665000	121550000	16701000	57344000	32985000	44704000	33463000	80193000	5363700	132960000	85529000	37782000	485750000	540730000	463640000	389160000	80672000	1755700	204120000	19932000	43712000	483150000	427110000	168010000	234690000	28444000	47121000	91665000	0	177540000	1216400000	15543000	337350000	3469100000	525270000	44378000	4766000	237380000	4783800000	19857000	82606000	112860000	1614900000	45647000	73296000
O15439-2;O15439;O15439-3	6	Multidrug resistance-associated protein 4	ABCC4	sp|O15439-2|MRP4-2_HUMAN Isoform of O15439, Isoform 2 of Multidrug resistance-associated protein 4 OS=Homo sapiens OX=9606 GN=ABCC4 PE=1 SV=3;sp|O15439|MRP4_HUMAN Multidrug resistance-associated protein 4 OS=Homo sapiens OX=9606 GN=ABCC4 PE=1 SV=3;sp|O1543	73247000	167640000	13737000	46040000	235800000	7344000	21533000	130290000	615450	212270000	15802000	93555000	92319000	298760000	661550000	6680800000	40394000	2171100	165210000	316540000	122240000	1424100000	8706100	17052000	62979000	145730000	145280000	417110000	3431400	4351100000	335470000	1064900	171310000	729520000	2607400000	3137600000	595620000	181170000	206340000	32764000	500370000	746910000	149400000	49991000	9091800
P28288	1	ATP-binding cassette sub-family D member 3	ABCD3	sp|P28288|ABCD3_HUMAN ATP-binding cassette sub-family D member 3 OS=Homo sapiens OX=9606 GN=ABCD3 PE=1 SV=1	9180700	110770000	1017300	2626600	0	5943000	0	13456000	0	30908000	10679000	1260100000	85870000	24324000	29132000	20290000	3711600	0	51336000	13365000	0	0	14283000	0	12012000	11106000	8883900	7019700	0	123300000	49514000	9063200	48436000	773920	56937000	5082300	17044000	84544000	9212400	0	2663700	10072000	1248800000	122810000	1385700
P61221;D6R9I9	4	ATP-binding cassette sub-family E member 1	ABCE1	sp|P61221|ABCE1_HUMAN ATP-binding cassette sub-family E member 1 OS=Homo sapiens OX=9606 GN=ABCE1 PE=1 SV=1;tr|D6R9I9|D6R9I9_HUMAN Isoform of P61221, ATP-binding cassette sub-family E member 1 OS=Homo sapiens OX=9606 GN=ABCE1 PE=1 SV=1	194260000	504260000	78298000	89603000	139250000	130730000	26346000	454060000	79790000	559250000	171690000	266640000	1481800000	1156600000	571270000	77785000	239820000	163370000	2165700000	15565000	33827000	192880000	66129000	154430000	222910000	352070000	262530000	275140000	6263400	1037600000	2774800000	6769100	771920000	1610100000	68571000	36046000	628210000	999490000	1168100000	110940000	964950000	856540000	128950000	46260000	241410000
Q8NE71;Q8NE71-2;H0YGW7	6	ATP-binding cassette sub-family F member 1	ABCF1	sp|Q8NE71|ABCF1_HUMAN ATP-binding cassette sub-family F member 1 OS=Homo sapiens OX=9606 GN=ABCF1 PE=1 SV=2;sp|Q8NE71-2|ABCF1-2_HUMAN Isoform of Q8NE71, Isoform 2 of ATP-binding cassette sub-family F member 1 OS=Homo sapiens OX=9606 GN=ABCF1 PE=1 SV=2;tr|H	137410000	100710000	0	32584000	13286000	15738000	202840	22728000	581560	69538000	19853000	42002000	133550000	212970000	207150000	74453000	13591000	947680	328490000	3429900	5789700	1015800	1358000	25598000	119730000	21547000	22045000	103090000	986690	294690000	802870000	1634800	119690000	119970000	26724000	37142000	361050000	1584300000	154430000	14226000	59601000	819480000	3079400	259430000	63186000
Q9NUQ8-2;Q9NUQ8	2	ATP-binding cassette sub-family F member 3	ABCF3	sp|Q9NUQ8-2|ABCF3-2_HUMAN Isoform of Q9NUQ8, Isoform 2 of ATP-binding cassette sub-family F member 3 OS=Homo sapiens OX=9606 GN=ABCF3 PE=1 SV=2;sp|Q9NUQ8|ABCF3_HUMAN ATP-binding cassette sub-family F member 3 OS=Homo sapiens OX=9606 GN=ABCF3 PE=1 SV=2	29079000	135060000	22820000	30194000	52390000	46360000	5264300	20329000	20787000	537480000	19319000	17247000	152050000	62886000	789120000	397360000	68205000	1953200	499910000	19857000	2801900	50823000	10912000	5016500	1033300000	29316000	100110000	385660000	1358900	562810000	647430000	7570600	865740000	71601000	66473000	94574000	98134000	203740000	240050000	6184000	73684000	1423400000	10469000	35793000	844830000
Q9H222;E7EX35	2	ATP-binding cassette sub-family G member 5	ABCG5	sp|Q9H222|ABCG5_HUMAN ATP-binding cassette sub-family G member 5 OS=Homo sapiens OX=9606 GN=ABCG5 PE=1 SV=1;tr|E7EX35|E7EX35_HUMAN Isoform of Q9H222, ATP-binding cassette sub-family G member 5 OS=Homo sapiens OX=9606 GN=ABCG5 PE=1 SV=1	25082000	70085000	50082000	114890000	460540	18765000	11231000	45942000	25792000	946970000	79653000	335400000	273840000	406620000	190650000	48960000	162390000	16937000	525310000	5552000	8810900	3610900	36445000	18957000	11498000	37940000	26826000	54071000	241520	424010000	1115100000	7042500	391090000	306570000	22767000	11669000	81751000	692050000	241360000	27862000	1454900000	234150000	6604600	16576000	86213000
Q9NUJ1;Q9NUJ1-2	5	Mycophenolic acid acyl-glucuronide esterase, mitochondrial	ABHD10	sp|Q9NUJ1|ABHDA_HUMAN Mycophenolic acid acyl-glucuronide esterase, mitochondrial OS=Homo sapiens OX=9606 GN=ABHD10 PE=1 SV=1;sp|Q9NUJ1-2|ABHDA-2_HUMAN Isoform of Q9NUJ1, Isoform 2 of Mycophenolic acid acyl-glucuronide esterase, mitochondrial OS=Homo sapien	438620000	2261600000	18708000	77493000	43532000	5146400	59200000	108370000	0	172040000	116560000	183760000	143300000	456030000	183810000	213610000	40894000	7005500	330420000	57202000	5546000	97820000	38420000	104810000	52073000	31360000	64895000	255730000	18284000	264950000	669420000	2588900	471960000	350020000	103020000	57554000	46898000	70128000	92685000	1222500	88396000	479030000	39472000	85640000	113470000
Q8N2K0;Q8N2K0-2;Q8N2K0-3;Q5T712	7	Monoacylglycerol lipase ABHD12	ABHD12	sp|Q8N2K0|ABD12_HUMAN Lysophosphatidylserine lipase ABHD12 OS=Homo sapiens OX=9606 GN=ABHD12 PE=1 SV=2;sp|Q8N2K0-2|ABD12-2_HUMAN Isoform of Q8N2K0, Isoform 2 of Lysophosphatidylserine lipase ABHD12 OS=Homo sapiens OX=9606 GN=ABHD12 PE=1 SV=2;sp|Q8N2K0-3|AB	10141000	7662800	5885700	1310800	3488100	0	1542600	0	0	23874000	3253100	1804900	95632000	166740000	77640000	25341000	4228600	0	15953000	10826000	1355300	2435600	42675000	0	1265200	5966200	15587000	17415000	0	43828000	52033000	0	2838100	4915700	26259000	0	3218400000	78069000	44274000	2678300	6563400	9443900000	33815000	0	0
Q96IU4;B4DQI4	2	Alpha/beta hydrolase domain-containing protein 14B	ABHD14B	sp|Q96IU4|ABHEB_HUMAN Protein ABHD14B OS=Homo sapiens OX=9606 GN=ABHD14B PE=1 SV=1;tr|B4DQI4|B4DQI4_HUMAN Isoform of Q96IU4, Protein ABHD14B OS=Homo sapiens OX=9606 GN=ABHD14B PE=1 SV=1	8540600	13115000	0	99003000	41976000	2449900	3730300	13593000	0	262440000	21655000	8890400	121970000	158200000	220710000	106720000	5816900	3705800	183930000	0	4362600	16647000	13147000	18695000	43346000	31074000	5922300	165510000	11167000	158510000	241660000	3615300	171280000	110700000	72966000	787890	27427000	92519000	25473000	6449400	75450000	120010000	101900000	228700000	35665000
Q8TB40;Q8TB40-2	6	Abhydrolase domain-containing protein 4	ABHD4	sp|Q8TB40|ABHD4_HUMAN Protein ABHD4 OS=Homo sapiens OX=9606 GN=ABHD4 PE=2 SV=1;sp|Q8TB40-2|ABHD4-2_HUMAN Isoform of Q8TB40, Isoform 2 of Protein ABHD4 OS=Homo sapiens OX=9606 GN=ABHD4 PE=2 SV=1	7433300	17592000	0	43456000	25048000	15532000	27922000	66625000	0	17267000	2947400	18788000	92868000	3487400000	441800000	28074000	39749000	7144100	4969900000	0	14443000	46817000	23031000	5425500	1120800	19732000	745400000	36649000	0	49442000	93641000	0	327470000	85994000	199480	492600000	45552000	466540000	128830000	1616800	143600000	73273000	11054000	1351800000	0
C9J1D1;Q8WTS1	2	1-acylglycerol-3-phosphate O-acyltransferase ABHD5	ABHD5	tr|C9J1D1|C9J1D1_HUMAN Isoform of Q8WTS1, 1-acylglycerol-3-phosphate O-acyltransferase ABHD5 OS=Homo sapiens OX=9606 GN=ABHD5 PE=1 SV=2;sp|Q8WTS1|ABHD5_HUMAN 1-acylglycerol-3-phosphate O-acyltransferase ABHD5 OS=Homo sapiens OX=9606 GN=ABHD5 PE=1 SV=1	46121000	1518100	355570	47582000	1357900	2123400	1611800	11970000	0	2344500000	2707600	3196100	1420600	7315900	16263000	0	0	46431000	87714000	586790	0	0	5499100	7093200	4636300	2944100	4312900	64307000	0	8922100	14842000	0	14910000	0	444870000	862840	0	97200000	11067000	0	0	2795800	4269200	1306800	0
Q8IZP0-4;Q8IZP0-3;Q8IZP0-6;Q8IZP0-9;Q8IZP0;B6VEX4;A0A0A0MRT6;Q8IZP0-8;Q8IZP0-7;Q8IZP0-2;Q8IZP0-5;Q8IZP0-10;Q8IZP0-12;Q8IZP0-11	14	Abl interactor 1	ABI1	sp|Q8IZP0-4|ABI1-4_HUMAN Isoform of Q8IZP0, Isoform 4 of Abl interactor 1 OS=Homo sapiens OX=9606 GN=ABI1 PE=1 SV=4;sp|Q8IZP0-3|ABI1-3_HUMAN Isoform of Q8IZP0, Isoform 3 of Abl interactor 1 OS=Homo sapiens OX=9606 GN=ABI1 PE=1 SV=4;sp|Q8IZP0-6|ABI1-6_HUMAN	1632400000	2178500000	543940000	748330000	1483000000	3796600000	1628100000	5123800000	789600000	5832100000	1497700000	2850900000	4500300000	15366000000	2190700000	1546600000	2031500000	850340000	5574300000	1166600000	510100000	2454700000	2647900000	2514100000	1587000000	3600200000	1365300000	491210000	348400000	9597700000	14813000000	808370000	8506100000	2637700000	2197800000	1464100000	7675900000	43357000000	4688800000	970110000	6909800000	18541000000	1879400000	2575400000	872160000
Q9NYB9;Q9NYB9-4;Q9NYB9-2;F8WAL6;A0A0C4DG21;E7EP65;E7EW77;B7Z836;Q9NYB9-3	17	Abl interactor 2	ABI2	sp|Q9NYB9|ABI2_HUMAN Abl interactor 2 OS=Homo sapiens OX=9606 GN=ABI2 PE=1 SV=1;sp|Q9NYB9-4|ABI2-4_HUMAN Isoform of Q9NYB9, Isoform 4 of Abl interactor 2 OS=Homo sapiens OX=9606 GN=ABI2 PE=1 SV=1;sp|Q9NYB9-2|ABI2-2_HUMAN Isoform of Q9NYB9, Isoform 2 of Abl	419170000	1939900000	603590000	409970000	440540000	1853400000	415480000	4661600000	443670000	4388700000	562110000	2605100000	6955500000	5262900000	1783700000	1232200000	723340000	556060000	6232600000	45003000	163270000	2469900000	1392500000	2513000000	626160000	1867200000	880850000	876850000	124510000	3759400000	12667000000	250720000	2957700000	700150000	224540000	207980000	2346100000	3543700000	2879600000	324820000	3023600000	10306000000	1005500000	156150000	797760000
Q9P2A4-2;Q9P2A4	4	ABI gene family member 3	ABI3	sp|Q9P2A4-2|ABI3-2_HUMAN Isoform of Q9P2A4, Isoform 2 of ABI gene family member 3 OS=Homo sapiens OX=9606 GN=ABI3 PE=1 SV=2;sp|Q9P2A4|ABI3_HUMAN ABI gene family member 3 OS=Homo sapiens OX=9606 GN=ABI3 PE=1 SV=2	5868100	628790000	395250000	192280000	201180000	101590000	13338000	4156900000	42054000	294450000	133670000	52638000	224500000	139430000	186730000	3570400000	115170000	93847000	596510000	174550000	72249000	45691000	36615000	99266000	163090000	113590000	134300000	769970000	29626000	249350000	952340000	390320000	907220000	171650000	203130000	22158000	191780000	1579700000	110860000	307590000	242770000	556630000	108960000	213530000	245830000
A0A3B3IS55;O14639;F8W8M4;A0A0A0MRL6;O14639-2;O14639-6;A0A494C1G0;A0A494C1P1	8	Actin-binding LIM protein 1	ABLIM1	tr|A0A3B3IS55|A0A3B3IS55_HUMAN Isoform of O14639, Actin-binding LIM protein 1 OS=Homo sapiens OX=9606 GN=ABLIM1 PE=1 SV=1;sp|O14639|ABLM1_HUMAN Actin-binding LIM protein 1 OS=Homo sapiens OX=9606 GN=ABLIM1 PE=1 SV=3;tr|F8W8M4|F8W8M4_HUMAN Isoform of O14639	5955300000	269270000	9412200	891780000	15841000	8803800	6469800	44362000	0	23671000	68935000	62389000	673620000	1818500000	4272400000	402180000	84279000	159940000	1517700000	77369000	16612000	101870000	10128000	17344000	52914000	75824000	113540000	80870000	56613000	354050000	1497900000	776480000	77594000	116630000	62199000	638660000	1126400000	273490000	400400000	39578000	259200000	1340400000	260520000	9751100	8272700
Q6H8Q1-2;Q6H8Q1-5;Q6H8Q1;Q6H8Q1-9;Q6H8Q1-8;Q6H8Q1-3;Q6H8Q1-7;F5GYR0;Q6H8Q1-6	11	Actin-binding LIM protein 2	ABLIM2	sp|Q6H8Q1-2|ABLM2-2_HUMAN Isoform of Q6H8Q1, Isoform 2 of Actin-binding LIM protein 2 OS=Homo sapiens OX=9606 GN=ABLIM2 PE=1 SV=2;sp|Q6H8Q1-5|ABLM2-5_HUMAN Isoform of Q6H8Q1, Isoform 5 of Actin-binding LIM protein 2 OS=Homo sapiens OX=9606 GN=ABLIM2 PE=1 S	34041000	0	180470000	350240000	32153000	2091400	558650	35766000	0	2458200	6172000	15389000	77879000	496600000	126400000	71429000	43448000	20491000	172650000	225830	4008600	12137000	0	105680000	1825100	31560000	113020000	15065000	3572000	111420000	1105900000	6464100	287700000	291300000	12760000	69499000	23557000	188960000	95095000	5229700	33480000	147520000	154880000	0	9601000
Q12979;Q12979-4;A0A1C7CYZ0;Q12979-2;A0A0G2JQ41;B7Z683	19	Active breakpoint cluster region-related protein	ABR	sp|Q12979|ABR_HUMAN Active breakpoint cluster region-related protein OS=Homo sapiens OX=9606 GN=ABR PE=2 SV=2;sp|Q12979-4|ABR-4_HUMAN Isoform of Q12979, Isoform 4 of Active breakpoint cluster region-related protein OS=Homo sapiens OX=9606 GN=ABR PE=2 SV=2;	115770000	206410000	2061200	55712000	17421000	4051900	3340800	149830000	0	606970000	49095000	156180000	505360000	198990000	28535000	60238000	43169000	2089700	273930000	32207000	11463000	47708000	22557000	24859000	1159300000	120990000	25603000	41550000	231100	426270000	1169500000	47875000	67079000	15185000	12424000	35515000	256200000	312630000	115340000	30944000	46978000	27825000	893630	9865400	11174000
Q9ULW3	1	Activator of basal transcription 1	ABT1	sp|Q9ULW3|ABT1_HUMAN Activator of basal transcription 1 OS=Homo sapiens OX=9606 GN=ABT1 PE=1 SV=1	190560000	230450000	43159000	460180000	77106000	6519700	12344000	1861800000	106170000	868500000	512650000	197120000	262860000	2665700000	1450700000	411760000	100400000	60661000	808160000	65544000	47679000	52909000	276330000	112960000	67513000	323040000	90737000	1454900000	40692000	1536600000	9658100000	65074000	3601700000	329340000	366420000	933480000	866350000	1260500000	604480000	40253000	1009600000	1710800000	1395300000	13367000	113550000
Q8N961;Q8N961-2	2	Ankyrin repeat and BTB/POZ domain-containing protein 2	ABTB2	sp|Q8N961|ABTB2_HUMAN Ankyrin repeat and BTB/POZ domain-containing protein 2 OS=Homo sapiens OX=9606 GN=ABTB2 PE=2 SV=2;sp|Q8N961-2|ABTB2-2_HUMAN Isoform of Q8N961, Isoform 2 of Ankyrin repeat and BTB/POZ domain-containing protein 2 OS=Homo sapiens OX=9606	64275000	61041000	264630000	422330000	77222000	45573000	37595000	27507000	2166800	224020000	58350000	821960000	1034400000	191210000	519670000	238920000	70043000	42906000	4507500000	50638000	18509000	51061000	29590000	108360000	81001000	67627000	10422000	7975900000	101580000	115110000	742690000	4237600	1193500000	345870000	14818000	118470000	109350000	319020000	91122000	6081600	185460000	1008000000	49382000	46055000	7221900
P09110;C9JDE9;H7C131	6	3-ketoacyl-CoA thiolase, peroxisomal	ACAA1	sp|P09110|THIK_HUMAN 3-ketoacyl-CoA thiolase, peroxisomal OS=Homo sapiens OX=9606 GN=ACAA1 PE=1 SV=2;tr|C9JDE9|C9JDE9_HUMAN Isoform of P09110, 3-ketoacyl-CoA thiolase, peroxisomal OS=Homo sapiens OX=9606 GN=ACAA1 PE=1 SV=1;tr|H7C131|H7C131_HUMAN Isoform of	120970000	233610000	6960800	47948000	57506000	1750900	5318500	42549000	1004800	514440000	26355000	116380000	60298000	209340000	36243000	16026000	3889200	1249300	179080000	37453000	516220	13898000	11699000	8302500	351610000	58041000	10440000	75714000	0	109430000	602160000	0	141720000	10855000	32113000	2641800	49460000	143240000	11393000	36286000	3798300	73241000	0	51354000	29714000
P42765;A0A0B4J2A4	2	3-ketoacyl-CoA thiolase, mitochondrial	ACAA2	sp|P42765|THIM_HUMAN 3-ketoacyl-CoA thiolase, mitochondrial OS=Homo sapiens OX=9606 GN=ACAA2 PE=1 SV=2;tr|A0A0B4J2A4|A0A0B4J2A4_HUMAN Isoform of P42765, 3-ketoacyl-CoA thiolase, mitochondrial OS=Homo sapiens OX=9606 GN=ACAA2 PE=1 SV=1	127710000	1758400000	811500000	187120000	142420000	57593000	167010000	939400000	1329200	606620000	312060000	556720000	362580000	2109200000	800000000	1347500000	41738000	92799000	2667100000	96659000	12487000	685960000	332030000	146860000	67779000	1161000000	325550000	76330000	8912900	724110000	1822700000	57596000	477750000	359970000	26261000	314040000	229410000	2562600000	686390000	104390000	208640000	2885100000	351900000	8214100	235950000
Q13085;Q13085-4;Q13085-3;Q13085-2;Q59FY4	13	Acetyl-CoA carboxylase 1;Biotin carboxylase	ACACA	sp|Q13085|ACACA_HUMAN Acetyl-CoA carboxylase 1 OS=Homo sapiens OX=9606 GN=ACACA PE=1 SV=2;sp|Q13085-4|ACACA-4_HUMAN Isoform of Q13085, Isoform 4 of Acetyl-CoA carboxylase 1 OS=Homo sapiens OX=9606 GN=ACACA PE=1 SV=2;sp|Q13085-3|ACACA-3_HUMAN Isoform of Q13	521400000	420930000	42563000	1419600000	362090000	197990000	267300000	400100000	186010000	477360000	223530000	4180300000	2552500000	1879300000	1398200000	668010000	774100000	118510000	2302500000	165300000	121000000	519760000	84166000	70929000	236710000	1127400000	1100400000	560310000	10620000	1090400000	8433400000	89267000	3040700000	1663300000	1028800000	1727000000	2427300000	2711200000	1512500000	567970000	334080000	1204500000	299750000	406950000	503190000
O00763;O00763-2;O00763-3	7	Acetyl-CoA carboxylase 2;Biotin carboxylase	ACACB	sp|O00763|ACACB_HUMAN Acetyl-CoA carboxylase 2 OS=Homo sapiens OX=9606 GN=ACACB PE=1 SV=3;sp|O00763-2|ACACB-2_HUMAN Isoform of O00763, Isoform 2 of Acetyl-CoA carboxylase 2 OS=Homo sapiens OX=9606 GN=ACACB PE=1 SV=3;sp|O00763-3|ACACB-3_HUMAN Isoform of O00	193050000	30480000	32602000	53891000	3198800000	16038000	2330700000	204210000	283040000	73189000	12863000	69512000	1417600000	940210000	112850000	12532000000	11858000	1158500000	2255600000	286150000	473480000	114930000	3774800000	3012700000	202370000	263340000	163790000	96294000	292650	175920000	263870000	9939300	173280000	97366000	3007700000	28635000	21005000	957830000	8558500000	63863000	132480000	346050000	258830000	101510000	3227100000
Q6JQN1;Q6JQN1-5;Q6JQN1-2;F8W1I9	9	Acyl-CoA dehydrogenase family member 10	ACAD10	sp|Q6JQN1|ACD10_HUMAN Acyl-CoA dehydrogenase family member 10 OS=Homo sapiens OX=9606 GN=ACAD10 PE=1 SV=1;sp|Q6JQN1-5|ACD10-5_HUMAN Isoform of Q6JQN1, Isoform 5 of Acyl-CoA dehydrogenase family member 10 OS=Homo sapiens OX=9606 GN=ACAD10 PE=1 SV=1;sp|Q6JQN	207000000	105720000	6568100	44079000	1374600000	13905000	10132000	80567000	3695200	45263000	8962800	68935000	1179300000	163650000	83182000	16804000	68826000	5234600	443350000	88370000	8122500	53601000	4343800	11870000	56754000	2661100	0	44075000	1433500	316160000	65293000	8651100	93537000	138170000	326930000	10085000	354620000	328110000	161960000	8297600	71762000	328480000	263820000	94461000	19824000
Q709F0;F8WEV0;D6RDI8;Q709F0-3;Q709F0-2	5	Acyl-CoA dehydrogenase family member 11	ACAD11	sp|Q709F0|ACD11_HUMAN Acyl-CoA dehydrogenase family member 11 OS=Homo sapiens OX=9606 GN=ACAD11 PE=1 SV=3;tr|F8WEV0|F8WEV0_HUMAN Isoform of Q709F0, Acyl-CoA dehydrogenase family member 11 OS=Homo sapiens OX=9606 GN=ACAD11 PE=1 SV=2;tr|D6RDI8|D6RDI8_HUMAN I	56436000	79672000	6431700	51728000	4279700	12861000	19976000	10590000	0	66572000	212450000	32195000	401500000	211070000	36728000	225370000	2184200	0	883940000	1534200	6083400	7911900	48654000	4735000	32830000	10500000	28520000	376780000	11556000	366960000	74685000	2164900	28479000	141610000	62543000	28095000	75606000	169950000	118450000	5084900	64669000	280670000	39821000	10858000	1752000
Q9UKU7;Q9UKU7-3;Q9UKU7-2	5	Isobutyryl-CoA dehydrogenase, mitochondrial	ACAD8	sp|Q9UKU7|ACAD8_HUMAN Isobutyryl-CoA dehydrogenase, mitochondrial OS=Homo sapiens OX=9606 GN=ACAD8 PE=1 SV=1;sp|Q9UKU7-3|ACAD8-3_HUMAN Isoform of Q9UKU7, Isoform 3 of Isobutyryl-CoA dehydrogenase, mitochondrial OS=Homo sapiens OX=9606 GN=ACAD8 PE=1 SV=1;sp	11239000000	17647000000	2467500000	1116600000	1430000000	1034000000	731510000	5685500000	443950000	3192100000	919400000	11777000000	804980000	7256700000	5367800000	1779400000	526900000	361260000	18665000000	3282900000	139640000	3570600000	2290600000	1811100000	681730000	3811300000	715700000	13722000000	34143000000	5994000000	9771400000	390770000	3118000000	1563100000	3198800000	1165600000	1303800000	4789200000	943810000	1197300000	2766700000	11661000000	877470000	466350000	521230000
Q9H845;H0Y8Z9	2	Acyl-CoA dehydrogenase family member 9, mitochondrial	ACAD9	sp|Q9H845|ACAD9_HUMAN Acyl-CoA dehydrogenase family member 9, mitochondrial OS=Homo sapiens OX=9606 GN=ACAD9 PE=1 SV=1;tr|H0Y8Z9|H0Y8Z9_HUMAN Isoform of Q9H845, Acyl-CoA dehydrogenase family member 9, mitochondrial (Fragment) OS=Homo sapiens OX=9606 GN=ACA	1672500000	3153900000	538830000	257500000	592940000	257410000	112730000	911000000	132810000	2655500000	636070000	2057600000	1532600000	2485700000	1834400000	1809400000	1332600000	38648000	2821800000	183770000	2154300000	693210000	540630000	3472400000	539420000	925080000	473890000	1495200000	3579800000	24932000000	13154000000	194820000	3122300000	1432500000	448990000	743260000	660930000	1070400000	428040000	876780000	95855000	1168700000	95796000	1113200000	1577900000
P28330	1	Long-chain specific acyl-CoA dehydrogenase, mitochondrial	ACADL	sp|P28330|ACADL_HUMAN Long-chain specific acyl-CoA dehydrogenase, mitochondrial OS=Homo sapiens OX=9606 GN=ACADL PE=1 SV=2	43198000	29801000	0	48221000	33405000	9140200	4302500	36747000	2916200	0	1737500	54678000	39776000	91023000	25393000	24681000	5473600	655110	22789000	2275900	6087800	13434000	737240	0	16556000	0	139480000	12383000	5313700	47277000	70630000	1462500	29115000	69919000	77016000	20707000	0	3954300	30358000	35443000	30831000	42840000	3716100	6218200	90051000
B7Z9I1	1		ACADM	tr|B7Z9I1|B7Z9I1_HUMAN Isoform of P11310, Medium-chain-specific acyl-CoA dehydrogenase, mitochondrial OS=Homo sapiens OX=9606 GN=ACADM PE=1 SV=1	856170000	768790000	38031000	142670000	261600000	92545000	613810000	232020000	0	130700000	153740000	503620000	229370000	725750000	2562300000	1067500000	97274000	52899000	1729000000	223190000	20305000	570680000	73357000	125130000	9394000	496380000	135410000	772090000	63790000	2611800000	621300000	53693000	1896800000	326460000	118160000	208390000	183710000	365220000	386170000	169680000	1068100000	421500000	200160000	97804000	155760000
P16219;E9PE82	2	Short-chain specific acyl-CoA dehydrogenase, mitochondrial	ACADS	sp|P16219|ACADS_HUMAN Short-chain specific acyl-CoA dehydrogenase, mitochondrial OS=Homo sapiens OX=9606 GN=ACADS PE=1 SV=1;tr|E9PE82|E9PE82_HUMAN Isoform of P16219, Short-chain-specific acyl-CoA dehydrogenase, mitochondrial OS=Homo sapiens OX=9606 GN=ACAD	5274400000	13314000000	1894800000	1047000000	823700000	1363500000	1541400000	1895600000	34578000	4010400000	1222900000	6092700000	1013400000	4876000000	705170000	1497000000	363950000	236190000	7715400000	1041200000	72721000	3813000000	3140400000	1541300000	990070000	3964500000	778980000	2056500000	278930000	5740200000	14239000000	338200000	2576600000	833430000	535670000	1630000000	654950000	1587300000	871820000	771000000	713840000	3133900000	512310000	793820000	1416000000
P45954;P45954-2	2	Short/branched chain specific acyl-CoA dehydrogenase, mitochondrial	ACADSB	sp|P45954|ACDSB_HUMAN Short/branched chain specific acyl-CoA dehydrogenase, mitochondrial OS=Homo sapiens OX=9606 GN=ACADSB PE=1 SV=1;sp|P45954-2|ACDSB-2_HUMAN Isoform of P45954, Isoform 2 of Short/branched chain specific acyl-CoA dehydrogenase, mitochondr	2512600000	11135000000	772850000	1110500000	1128000000	555500000	930190000	3053800000	24490000	3439200000	1030600000	7859500000	1940600000	15111000000	7037100000	3882100000	707370000	436730000	7289800000	1806700000	232340000	3387700000	1484200000	1382900000	883320000	2514000000	807470000	4268500000	477170000	8336700000	12705000000	507360000	3937000000	3078800000	827490000	2509200000	1708600000	3706700000	2551600000	1141600000	2662600000	9943000000	1237800000	1390500000	1314200000
P49748-3;P49748	5	Very long-chain specific acyl-CoA dehydrogenase, mitochondrial	ACADVL	sp|P49748-3|ACADV-3_HUMAN Isoform of P49748, Isoform 3 of Very long-chain specific acyl-CoA dehydrogenase, mitochondrial OS=Homo sapiens OX=9606 GN=ACADVL PE=1 SV=1;sp|P49748|ACADV_HUMAN Very long-chain specific acyl-CoA dehydrogenase, mitochondrial OS=Hom	26401000000	25238000000	3172000000	6866600000	3008100000	4301400000	7322800000	7196200000	8238000000	6026600000	3205100000	18756000000	6225700000	41503000000	10396000000	11652000000	1447600000	662780000	43534000000	2230700000	360900000	12469000000	8763800000	5567900000	1441000000	3863000000	2627500000	69820000000	460600000	40660000000	22778000000	1341500000	15836000000	6383100000	2244000000	4225900000	1863000000	8912500000	2545700000	5490200000	6809500000	20460000000	1048500000	18593000000	1540800000
H0YMF1;P16112	2	Aggrecan core protein;Aggrecan core protein 2	ACAN	tr|H0YMF1|H0YMF1_HUMAN Isoform of P16112, Aggrecan core protein OS=Homo sapiens OX=9606 GN=ACAN PE=1 SV=2;sp|P16112|PGCA_HUMAN Aggrecan core protein OS=Homo sapiens OX=9606 GN=ACAN PE=1 SV=3	286010000	2246600000	63395000	103840000	44328000	45534000	98008000	53804000	686640000	172510000	46392000	80419000	391990000	2470800000	416200000	625370000	253300000	18522000	1588800000	520720000	10324000	294410000	34311000	83836000	28676000	55988000	91834000	841260000	6863900	95651000	1732500000	0	686460000	65468000	64243000	209040000	269070000	303280000	474460000	47510000	125750000	2542500000	56599000	273810000	175180000
Q15057;A0A087X1H5;A0A0U1RQT1	5	Arf-GAP with coiled-coil, ANK repeat and PH domain-containing protein 2	ACAP2	sp|Q15057|ACAP2_HUMAN Arf-GAP with coiled-coil, ANK repeat and PH domain-containing protein 2 OS=Homo sapiens OX=9606 GN=ACAP2 PE=1 SV=3;tr|A0A087X1H5|A0A087X1H5_HUMAN Isoform of Q15057, Arf-GAP with coiled-coil, ANK repeat and PH domain-containing protein	63623000	80367000	14376000	523550000	490700000	91840000	38902000	148400000	40614000	272430000	92823000	89663000	950940000	727280000	413850000	6818600000	307810000	136020000	989250000	514540000	23628000	334670000	324340000	28101000	81114000	109540000	255730000	437870000	8613800	459990000	1315000000	11281000	2444600000	134780000	49574000	738600000	529130000	732950000	1261900000	156770000	819160000	318490000	368740000	3044200000	78049000
P24752	5	Acetyl-CoA acetyltransferase, mitochondrial	ACAT1	sp|P24752|THIL_HUMAN Acetyl-CoA acetyltransferase, mitochondrial OS=Homo sapiens OX=9606 GN=ACAT1 PE=1 SV=1	2667400000	5920500000	1713400000	389740000	417150000	181630000	67406000	1146400000	2894200	1379900000	307710000	3163400000	556370000	3905400000	3136700000	1139700000	121520000	172500000	7743200000	400610000	54613000	2986700000	422830000	574710000	832870000	1689200000	148390000	3263400000	138230000	1065500000	6144100000	85443000	2851700000	682430000	154580000	1211600000	513630000	953620000	714400000	446860000	1310400000	2833400000	237350000	52459000	541320000
Q9BWD1;Q9BWD1-2	2	Acetyl-CoA acetyltransferase, cytosolic	ACAT2	sp|Q9BWD1|THIC_HUMAN Acetyl-CoA acetyltransferase, cytosolic OS=Homo sapiens OX=9606 GN=ACAT2 PE=1 SV=2;sp|Q9BWD1-2|THIC-2_HUMAN Isoform of Q9BWD1, Isoform 2 of Acetyl-CoA acetyltransferase, cytosolic OS=Homo sapiens OX=9606 GN=ACAT2 PE=1 SV=2	545300000	2165200000	172210000	136200000	408150000	19911000	670710000	225650000	0	140460000	192600000	780760000	137210000	2606000000	125720000	1060700000	3268200	17059000	2803000000	508810000	2533500	656240000	799180000	116710000	56291000	213010000	67859000	783560000	53545000	1686700000	239820000	17865000	562880000	34028000	149800000	17437000	3427600	418250000	105700000	10512000	3727000	331320000	10400000	475560000	355220000
Q9H3P7	1	Golgi resident protein GCP60	ACBD3	sp|Q9H3P7|GCP60_HUMAN Golgi resident protein GCP60 OS=Homo sapiens OX=9606 GN=ACBD3 PE=1 SV=4	24407000	1867400000	70015000	388510000	14546000	1248700	283730	2140800	0	13744000	0	742030000	726030	189210000	27367000000	45336000	327730000	1789700	861600000	0	4628200000	987880000	18759000	81386000	56193000	1231700000	54076000	2090600000	2643700	2014800000	108290000	0	9279100000	13429000	126860000	145940000	109130000	1006400000	13861000	3629900	62752000	105840000	260830000	560880	49047000
P12821;A0A0A0MSN4;P12821-2;P12821-4;P12821-3	5	Angiotensin-converting enzyme;Angiotensin-converting enzyme, soluble form	ACE	sp|P12821|ACE_HUMAN Angiotensin-converting enzyme OS=Homo sapiens OX=9606 GN=ACE PE=1 SV=1;tr|A0A0A0MSN4|A0A0A0MSN4_HUMAN Isoform of P12821, Angiotensin-converting enzyme OS=Homo sapiens OX=9606 GN=ACE PE=1 SV=1;sp|P12821-2|ACE-2_HUMAN Isoform of P12821, I	51862000	236870000	384190	24544000	24137000	10694000	30096000	153690000	10378000	1835400	24577000	63217000	148060000	255650000	107100000	113920000	37590000	22652000	371420000	6081800	68759000	56423000	8117400	25055000	11474000	12454000	5542600	73115000	2126300	158900000	161430000	1087000	891860000	6387600	5483400	129470000	17623000	80092000	48375000	8476100	55487000	180070000	225760000	41665000	48707000
P22303;P22303-4;P22303-2;F8WD68;P22303-3	5	Acetylcholinesterase;Carboxylic ester hydrolase	ACHE	sp|P22303|ACES_HUMAN Acetylcholinesterase OS=Homo sapiens OX=9606 GN=ACHE PE=1 SV=1;sp|P22303-4|ACES-4_HUMAN Isoform of P22303, Isoform R of Acetylcholinesterase OS=Homo sapiens OX=9606 GN=ACHE PE=1 SV=1;sp|P22303-2|ACES-2_HUMAN Isoform of P22303, Isoform	81231000	26014000	4470100	20709000	2769500	1503200	2134700	34062000	7037500	11226000	15394000	9337300	62986000	60304000	403930000	27198000	44068000	502120	95017000	1323300	11067000	11028000	6302100	37815000	9066200	9175900	24764000	57087000	0	833960000	379750000	0	50454000	29740000	21293000	15741000	27319000	124950000	137490000	2529400	50196000	267360000	0	59484000	528650
P53396	3	ATP-citrate synthase	ACLY	sp|P53396|ACLY_HUMAN ATP-citrate synthase OS=Homo sapiens OX=9606 GN=ACLY PE=1 SV=3	5005000000	11361000000	2742100000	31343000000	14835000000	11720000000	11769000000	17834000000	16320000000	42862000000	29807000000	14854000000	299130000000	58036000000	18488000000	17912000000	16413000000	8718600000	28659000000	15814000000	4005300000	22032000000	13195000000	27203000000	6317800000	21452000000	23916000000	2175400000	6712000000	32912000000	363370000000	15973000000	62636000000	40649000000	59664000000	40266000000	30606000000	225790000000	228770000000	4792300000	27373000000	65099000000	10380000000	37101000000	23081000000
P21399	1	Cytoplasmic aconitate hydratase	ACO1	sp|P21399|ACOC_HUMAN Cytoplasmic aconitate hydratase OS=Homo sapiens OX=9606 GN=ACO1 PE=1 SV=3	2157300000	2543900000	297240000	1164400000	750700000	224120000	88281000	1151100000	1142200000	854050000	491490000	1404900000	970130000	2705100000	3017900000	775330000	107250000	220040000	5263900000	1175100000	38858000	2277000000	251260000	124410000	116620000	977340000	294000000	481460000	270030000	3582800000	1774000000	14662000	2535900000	777400000	593920000	430960000	48391000	1072200000	1127300000	305540000	1005200000	578620000	63874000	2084800000	179280000
A2A274;Q99798	2	Aconitate hydratase, mitochondrial	ACO2	tr|A2A274|A2A274_HUMAN Isoform of Q99798, Aconitate hydratase, mitochondrial OS=Homo sapiens OX=9606 GN=ACO2 PE=1 SV=1;sp|Q99798|ACON_HUMAN Aconitate hydratase, mitochondrial OS=Homo sapiens OX=9606 GN=ACO2 PE=1 SV=2	1301300000	429770000	51116000	119190000	234170000	30346000	402940000	962050000	104990000	298380000	150810000	250260000	344840000	832170000	790290000	690700000	536700000	71246000	1269400000	55758000	43161000	1082500000	179010000	81569000	42736000	1936200000	188850000	211330000	21679000	671410000	706160000	18986000	1728100000	748420000	368410000	482850000	248680000	3128800000	239450000	1425600000	2237900000	1717200000	96587000	9434900	149850000
Q8WXI4-2;Q8WXI4	2	Acyl-coenzyme A thioesterase 11	ACOT11	sp|Q8WXI4-2|ACO11-2_HUMAN Isoform of Q8WXI4, Isoform 2 of Acyl-coenzyme A thioesterase 11 OS=Homo sapiens OX=9606 GN=ACOT11 PE=1 SV=1;sp|Q8WXI4|ACO11_HUMAN Acyl-coenzyme A thioesterase 11 OS=Homo sapiens OX=9606 GN=ACOT11 PE=1 SV=1	20296000	99455000	8054800	119100000	115310000	13685000	14316000	0	88527000	40802000	29103000	52382000	43345000	221500000	166810000	81114000	33539000	10459000	326030000	4620300	0	31694000	42267000	6224800	674720000	52278000	370290000	67526000	0	282540000	440890000	2362100	203290000	171240000	41166000	44582000	27945000	224730000	154550000	56859000	95465000	138340000	14242000	20345000	411260000
Q9NPJ3-2;Q9NPJ3	2	Acyl-coenzyme A thioesterase 13;Acyl-coenzyme A thioesterase 13, N-terminally processed	ACOT13	sp|Q9NPJ3-2|ACO13-2_HUMAN Isoform of Q9NPJ3, Isoform 2 of Acyl-coenzyme A thioesterase 13 OS=Homo sapiens OX=9606 GN=ACOT13 PE=1 SV=1;sp|Q9NPJ3|ACO13_HUMAN Acyl-coenzyme A thioesterase 13 OS=Homo sapiens OX=9606 GN=ACOT13 PE=1 SV=1	37090000	11861000	7076400	3001000	8809000	3501400	23320000	28390000	3031400	11976000	4998900	10688000	40834000	74498000	64496000	70176000	13384000	0	84379000	21540000	8301600	291440	53746000	5509000	2034900	6130000	12225000	114520000	469860	72763000	160120000	6126600	120460000	21616000	57223000	4433900	11319000	206860000	16055000	2807000	33022000	162430000	9631400	74535000	14365000
A0A087X0W7;A0A087WT95;Q86TX2;P49753;G3V4F2;P49753-2	6	Acyl-coenzyme A thioesterase 1;Acyl-coenzyme A thioesterase 2, mitochondrial	ACOT2;ACOT1	tr|A0A087X0W7|A0A087X0W7_HUMAN Isoform of P49753, Acyl-coenzyme A thioesterase 2, mitochondrial OS=Homo sapiens OX=9606 GN=ACOT2 PE=1 SV=1;tr|A0A087WT95|A0A087WT95_HUMAN Isoform of P49753, Acyl-coenzyme A thioesterase 2, mitochondrial OS=Homo sapiens OX=96	2547000000	46902000	5920000	2748700000	44039000	8166600000	323210000	734370000	0	202670000	1079900	8427600	51079000	92015000	5109800000	14014000	3483600	0	12867000000	89299000	1377700	15695000	347810000	29719000	3494900	15401000	499710	512420000	0	6702500000	522220000	1650100	214830000	2859400000	3096100	178680000	154110000	39799000	142780000	263410	3728800000	184610000	281790000	5032600	121580000
O00154;O00154-6;O00154-7;O00154-5;K7EKP8	5	Cytosolic acyl coenzyme A thioester hydrolase	ACOT7	sp|O00154|BACH_HUMAN Cytosolic acyl coenzyme A thioester hydrolase OS=Homo sapiens OX=9606 GN=ACOT7 PE=1 SV=3;sp|O00154-6|BACH-6_HUMAN Isoform of O00154, Isoform 6 of Cytosolic acyl coenzyme A thioester hydrolase OS=Homo sapiens OX=9606 GN=ACOT7 PE=1 SV=3;	2340100000	1888700000	541720000	3192800000	506980000	395120000	360620000	525630000	168920000	4790600000	2851700000	14548000000	1149000000	16612000000	17939000000	2389700000	513680000	947290000	26801000000	4337700000	72492000	923350000	933390000	586480000	2274600000	7605800000	3376900000	17210000000	194160000	9153000000	3289200000	1022800000	9547000000	5399200000	228270000	751610000	4235800000	2711600000	6547600000	76665000	11039000000	2053900000	296640000	10062000000	3148000000
Q9Y305;Q9Y305-2;Q9Y305-4;Q9Y305-3;H7C5Q2	6	Acyl-coenzyme A thioesterase 9, mitochondrial	ACOT9	sp|Q9Y305|ACOT9_HUMAN Acyl-coenzyme A thioesterase 9, mitochondrial OS=Homo sapiens OX=9606 GN=ACOT9 PE=1 SV=2;sp|Q9Y305-2|ACOT9-2_HUMAN Isoform of Q9Y305, Isoform 2 of Acyl-coenzyme A thioesterase 9, mitochondrial OS=Homo sapiens OX=9606 GN=ACOT9 PE=1 SV=	3424800000	14369000000	2237800000	2426300000	2211600000	1200700000	1444500000	5043200000	170500000	4938500000	1149400000	10999000000	1647700000	16782000000	6876900000	3464700000	697560000	314640000	17433000000	1969600000	128090000	3560900000	2207300000	1898200000	900790000	5887800000	839750000	3239100000	398600000	11460000000	10973000000	584160000	3394500000	2809500000	3282100000	1492900000	2675000000	3130100000	2174600000	1157500000	3037000000	13475000000	1193800000	438880000	2241300000
Q15067-2;Q15067;Q15067-3	9	Peroxisomal acyl-coenzyme A oxidase 1	ACOX1	sp|Q15067-2|ACOX1-2_HUMAN Isoform of Q15067, Isoform 2 of Peroxisomal acyl-coenzyme A oxidase 1 OS=Homo sapiens OX=9606 GN=ACOX1 PE=1 SV=3;sp|Q15067|ACOX1_HUMAN Peroxisomal acyl-coenzyme A oxidase 1 OS=Homo sapiens OX=9606 GN=ACOX1 PE=1 SV=3;sp|Q15067-3|AC	6643000000	5136500000	486320000	487430000	226480000	175250000	350990000	547970000	77744000	521280000	171820000	3108400000	246010000	1065900000	1495000000	439730000	59809000	26907000	2287500000	516390000	11871000	433520000	360610000	458240000	61456000	736790000	83041000	1981800000	19000000	1315200000	3582900000	45259000	436030000	165850000	997980000	128150000	147730000	228850000	183210000	159240000	193980000	1766500000	123340000	715170000	151780000
Q99424;C9J0G0	5	Peroxisomal acyl-coenzyme A oxidase 2;Acyl-coenzyme A oxidase	ACOX2	sp|Q99424|ACOX2_HUMAN Peroxisomal acyl-coenzyme A oxidase 2 OS=Homo sapiens OX=9606 GN=ACOX2 PE=1 SV=1;tr|C9J0G0|C9J0G0_HUMAN Isoform of Q99424, Acyl-coenzyme A oxidase OS=Homo sapiens OX=9606 GN=ACOX2 PE=1 SV=1	1476100000	578600000	25628000	57866000	496430000	300580000	16686000	76840000	99047000	36443000	23007000	217040000	43798000	886330000	310330000	80090000	263960000	133070000	1475400000	17409000	29179000	405120000	211800000	332560000	95345000	156380000	20383000	126200000	422010	4947800000	255820000	84019000	1169700000	1807200000	14394000	148730000	553000000	116160000	500720000	86108000	66757000	537420000	257060000	110550000	33303000
O15254;O15254-2	3	Peroxisomal acyl-coenzyme A oxidase 3	ACOX3	sp|O15254|ACOX3_HUMAN Peroxisomal acyl-coenzyme A oxidase 3 OS=Homo sapiens OX=9606 GN=ACOX3 PE=1 SV=2;sp|O15254-2|ACOX3-2_HUMAN Isoform of O15254, Isoform 2 of Peroxisomal acyl-coenzyme A oxidase 3 OS=Homo sapiens OX=9606 GN=ACOX3 PE=1 SV=2	852940000	788770000	16573000	281870000	55970000	15239000	34008000	178360000	839050	79850000	34003000	708770000	16250000000	946480000	697990000	185340000	33579000	4690100	652200000	7870700	70256000	99022000	108540000	72046000	541820000	198940000	20730000	45002000	0	1427300000	3129900000	6382700	268630000	182360000	12123000000	215940000	64618000	577930000	160510000	96050000	54104000	1999300000	9485400	42858000000	42446000
P24666;G5E9R5;P24666-3	4	Low molecular weight phosphotyrosine protein phosphatase	ACP1	sp|P24666|PPAC_HUMAN Low molecular weight phosphotyrosine protein phosphatase OS=Homo sapiens OX=9606 GN=ACP1 PE=1 SV=3;tr|G5E9R5|G5E9R5_HUMAN Isoform of P24666, Acid phosphatase 1, soluble, isoform CRA_d OS=Homo sapiens OX=9606 GN=ACP1 PE=1 SV=1;sp|P24666	403220000	311520000	63306000	396350000	247410000	128960000	143990000	294510000	0	425230000	310090000	359440000	882720000	1188300000	493760000	1007200000	69821000	59408000	477640000	142400000	43491000	14824000	286140000	189990000	163290000	1729700000	228260000	748800000	87626000	1838800000	1281900000	74733000	631950000	947930000	197560000	145460000	367850000	776510000	201090000	61486000	535610000	1250600000	192100000	201780000	338520000
B7Z7D2;E9PQY3;P11117;E9PHY0;E9PP23	5	Lysosomal acid phosphatase	ACP2	tr|B7Z7D2|B7Z7D2_HUMAN Isoform of P11117, Lysosomal acid phosphatase OS=Homo sapiens OX=9606 GN=ACP2 PE=1 SV=1;tr|E9PQY3|E9PQY3_HUMAN Isoform of P11117, Lysosomal acid phosphatase OS=Homo sapiens OX=9606 GN=ACP2 PE=1 SV=1;sp|P11117|PPAL_HUMAN Lysosomal aci	46925000	51159000	1155700	24577000	5342400	0	1342200	27583000	0	0	4472100	23013000	45089000	1251700000	201710000	0	0	2067000	1517800000	17718000	401320	5243800	1737200	7106700	8907500	10857000	3710700	43838000	0	183570000	237370000	0	27655000	33784000	15689000	93653000	0	93850000	14106000	19164000	83440000	266680000	2831300	15061000	22765000
P15309;P15309-2;E9PFE6;P15309-3	4	Prostatic acid phosphatase;PAPf39	ACPP	sp|P15309|PPAP_HUMAN Prostatic acid phosphatase OS=Homo sapiens OX=9606 GN=ACPP PE=1 SV=3;sp|P15309-2|PPAP-2_HUMAN Isoform of P15309, Isoform 2 of Prostatic acid phosphatase OS=Homo sapiens OX=9606 GN=ACPP PE=1 SV=3;tr|E9PFE6|E9PFE6_HUMAN Isoform of P15309	6796000	50251000	24605000	3729300	458390	341830	221050000	8512100	6617500	45227000	80113000	0	84584000	400570000	15706000	223340000	34932000	7264300	44165000	0	0	419440000	26011000	31905000	839140000	16812000	0	63295000	0	72565000	433610000	107070000	47336000	10931000	568100000	15356000	18487000	950960000	13899000	0	0	134530000	0	1117500000	13913000
Q96GR2;F5H4U6	5	Long-chain-fatty-acid--CoA ligase ACSBG1	ACSBG1	sp|Q96GR2|ACBG1_HUMAN Long-chain-fatty-acid--CoA ligase ACSBG1 OS=Homo sapiens OX=9606 GN=ACSBG1 PE=2 SV=2;tr|F5H4U6|F5H4U6_HUMAN Isoform of Q96GR2, Long-chain-fatty-acid--CoA ligase ACSBG1 OS=Homo sapiens OX=9606 GN=ACSBG1 PE=1 SV=1	55239000	30203000	8245700	58255000	152950000	37539000	10652000	98136000	1024900	63351000	54322000	60168000	429930000	557920000	118470000	152280000	211550000	287110000	388660000	2196500	348320000	50620000	18725000	76460000	297020000	423240000	248670000	155450000	1733300	318480000	703870000	0	459850000	14747000	82841000	2370900000	568860000	2874000000	390390000	182680000	229690000	1107700000	222420000	78592000	289220000
Q96CM8-3;Q96CM8;Q96CM8-2;E9PF16;Q96CM8-4	6	Acyl-CoA synthetase family member 2, mitochondrial	ACSF2	sp|Q96CM8-3|ACSF2-3_HUMAN Isoform of Q96CM8, Isoform 3 of Acyl-CoA synthetase family member 2, mitochondrial OS=Homo sapiens OX=9606 GN=ACSF2 PE=1 SV=2;sp|Q96CM8|ACSF2_HUMAN Acyl-CoA synthetase family member 2, mitochondrial OS=Homo sapiens OX=9606 GN=ACSF	47064000	60303000	31105000	68201000	158940000	23031000	9377400	0	368310	69704000	60688000	3910900	40302000	29360000	169060000	411190000	47268000	14094000	336120000	490930000	12276000	4459300	10316000	7363400	12630000	7884700	0	3251900	0	143050000	124350000	1017000	115670000	0	7828600	56850000	51004000	526020000	15728000	8113100	24056000	98382000	130940000	48434000	94192000
Q4G176;F5H5A1;A0A3B3ISK9;H0YGC7;F5H362;F5H755	10	Acyl-CoA synthetase family member 3, mitochondrial	ACSF3	sp|Q4G176|ACSF3_HUMAN Acyl-CoA synthetase family member 3, mitochondrial OS=Homo sapiens OX=9606 GN=ACSF3 PE=1 SV=3;tr|F5H5A1|F5H5A1_HUMAN Isoform of Q4G176, Acyl-CoA synthetase family member 3, mitochondrial OS=Homo sapiens OX=9606 GN=ACSF3 PE=1 SV=1;tr|A	18669000	61681000	2223900	719730	986870	4213800	5893400	1707700	0	11773000	42501000	31940000	114910000	23185000	59621000	22314000	77971000	2549900	53494000	8215700	0	170340	286210	0	20193000	9060900	15435000	95280000	75028000	163830000	54551000	0	70508000	5398200	4600100	38325000	72541000	497710000	63806000	0	32507000	138050000	0	0	6477100
P33121-3;P33121;E7EPM6;P33121-2;B7Z3Z9;D6RER0	9	Long-chain-fatty-acid--CoA ligase 1	ACSL1	sp|P33121-3|ACSL1-3_HUMAN Isoform of P33121, Isoform 3 of Long-chain-fatty-acid--CoA ligase 1 OS=Homo sapiens OX=9606 GN=ACSL1 PE=1 SV=1;sp|P33121|ACSL1_HUMAN Long-chain-fatty-acid--CoA ligase 1 OS=Homo sapiens OX=9606 GN=ACSL1 PE=1 SV=1;tr|E7EPM6|E7EPM6_H	212420000	590090000	137300000	333320000	142500000	72368000	123940000	420320000	19113000	152560000	425430000	1499100000	557800000	993290000	660020000	313230000	724090000	19601000	608820000	28004000	51613000	255220000	246640000	97147000	214940000	297480000	170360000	884130000	16452000	820220000	16045000000	68291000	1811700000	1599600000	517990000	1262700000	2978100000	2024900000	569260000	123500000	257140000	1888300000	427190000	193370000	290830000
O95573	4	Long-chain-fatty-acid--CoA ligase 3	ACSL3	sp|O95573|ACSL3_HUMAN Long-chain-fatty-acid--CoA ligase 3 OS=Homo sapiens OX=9606 GN=ACSL3 PE=1 SV=3	156360000	73946000	113820000	116460000	57271000	43853000	7039500	191280000	38847000	370890000	103190000	54962000	490160000	934470000	268070000	188450000	122720000	13951000	314540000	2003900	8701300	18908000	34642000	64271000	49266000	69440000	86001000	86124000	23426000	434470000	639400000	1413300	180320000	206370000	801610000	214010000	148920000	327510000	306070000	60180000	76404000	556150000	61674000	24921000	47495000
O60488-2;O60488	7	Long-chain-fatty-acid--CoA ligase 4	ACSL4	sp|O60488-2|ACSL4-2_HUMAN Isoform of O60488, Isoform Short of Long-chain-fatty-acid--CoA ligase 4 OS=Homo sapiens OX=9606 GN=ACSL4 PE=1 SV=2;sp|O60488|ACSL4_HUMAN Long-chain-fatty-acid--CoA ligase 4 OS=Homo sapiens OX=9606 GN=ACSL4 PE=1 SV=2	79855000	24571000	6535600	38197000	22410000	2758700	27059000	33827000	0	372440	972550	15470000	45857000	70102000	25315000	77304000	1031500	2400300	109120000	4709100	4161000	157030000	3082900	25745000	0	17523000	50428000	47419000	15742000	119740000	68301000	17031000	19649000	36742000	56729000	60221000	30718000	59761000	2584500	14132000	7539700	45201000	0	0	19724000
Q9UKU0-9;Q9UKU0-1;Q9UKU0;C9J8C7;Q9UKU0-6;Q9UKU0-5;E7ERD7;Q9UKU0-8;Q9UKU0-3;A0A494C0B6;A0A494C0J9;A0A494BZW8;Q9UKU0-2;A0A494C116;Q9UKU0-7	24	Long-chain-fatty-acid--CoA ligase 6	ACSL6	sp|Q9UKU0-9|ACSL6-9_HUMAN Isoform of Q9UKU0, Isoform 9 of Long-chain-fatty-acid--CoA ligase 6 OS=Homo sapiens OX=9606 GN=ACSL6 PE=2 SV=4;sp|Q9UKU0-1|ACSL6-1_HUMAN Isoform of Q9UKU0, Isoform 1 of Long-chain-fatty-acid--CoA ligase 6 OS=Homo sapiens OX=9606 G	324210000	528120000	21536000	1649500000	148840000	122560000	15676000	198200000	26407000	976090000	126680000	277540000	3896700000	1540500000	520300000	497310000	279160000	71122000	7736900000	1912800	20520000	202190000	513330000	196040000	69333000	842430000	316140000	601150000	95564000	1264800000	3181100000	10223000	2248200000	302310000	524520000	326150000	574580000	2890700000	599970000	117520000	637390000	1794100000	38994000	366200000	262420000
Q9NUB1-2;Q9NUB1;Q9NUB1-3;Q9NUB1-4	5	Acetyl-coenzyme A synthetase 2-like, mitochondrial	ACSS1	sp|Q9NUB1-2|ACS2L-2_HUMAN Isoform of Q9NUB1, Isoform 2 of Acetyl-coenzyme A synthetase 2-like, mitochondrial OS=Homo sapiens OX=9606 GN=ACSS1 PE=1 SV=2;sp|Q9NUB1|ACS2L_HUMAN Acetyl-coenzyme A synthetase 2-like, mitochondrial OS=Homo sapiens OX=9606 GN=ACSS	290450000	72494000	4296800	135020000	45164000	90623000	25549000	55410000	41576000	57591000	47375000	69866000	28167000	2510300000	112170000	70363000	7377600	9051200	142460000	12260000	8113200	125760000	59259000	26845000	3616500	43360000	43890000	22887000	5152100	877590000	701020000	440470	1254500000	109640000	48563000	156890000	97827000	127420000	22573000	3512600	67000000	334810000	453780000	1327100	119750000
Q9NR19;Q9NR19-2	10	Acetyl-coenzyme A synthetase, cytoplasmic	ACSS2	sp|Q9NR19|ACSA_HUMAN Acetyl-coenzyme A synthetase, cytoplasmic OS=Homo sapiens OX=9606 GN=ACSS2 PE=1 SV=1;sp|Q9NR19-2|ACSA-2_HUMAN Isoform of Q9NR19, Isoform 2 of Acetyl-coenzyme A synthetase, cytoplasmic OS=Homo sapiens OX=9606 GN=ACSS2 PE=1 SV=1	5223500	6391400	6446000	233000000	74300000	95553000	10133000	133660000	207510000	219280000	170150000	94248000	84363000	412260000	77707000	238940000	44213000	8123500	420450000	0	3970800	133410000	64371000	14564000	10055000	84915000	128860000	79643000	1807000	203110000	214950000	4962900	77685000	85093000	69859000	133680000	269560000	223480000	245650000	18488000	146720000	126130000	58333000	35475000	7783600
Q9H6R3;A0A0B4J1R2	5	Acyl-CoA synthetase short-chain family member 3, mitochondrial	ACSS3	sp|Q9H6R3|ACSS3_HUMAN Acyl-CoA synthetase short-chain family member 3, mitochondrial OS=Homo sapiens OX=9606 GN=ACSS3 PE=1 SV=1;tr|A0A0B4J1R2|A0A0B4J1R2_HUMAN Isoform of Q9H6R3, Acyl-CoA synthetase short-chain family member 3, mitochondrial OS=Homo sapiens	182050000	566010000	14099000	0	128820000	10464000	676910	61836000	0	28688000	3508800	10482000	414380000	21878000	45399000	81512000	0	55369000	76483000	0	0	18529000	5214400	13791000	7146000	31847000	7466000	13199000	570360	517780000	539780000	0	153890000	1421200	671920	34586000	20759000	19091000	316320000	29091000	303890	230550000	2594400	5712500	25314000
P68133;A6NL76	2	Actin, alpha skeletal muscle	ACTA1	sp|P68133|ACTS_HUMAN Actin, alpha skeletal muscle OS=Homo sapiens OX=9606 GN=ACTA1 PE=1 SV=1;tr|A6NL76|A6NL76_HUMAN Isoform of P68133, Actin, alpha skeletal muscle OS=Homo sapiens OX=9606 GN=ACTA1 PE=1 SV=3	805670000	178700000	27177000	4884500	209110000	2682200	0	2560800000	0	4439200000	251470000	1177600000	5409100	559450000	63280000	27193000	77723000	93862000	14724000	609940000	47884000	7449000	41989000	251380000	17717000	1023200000	0	30291000	0	11099000	5570500000	0	46572000	332390000	15556000	83043000	199230000	235010000	71955000	0	0	4025200000	1629700	370750000	660660000
P62736	3	Actin, aortic smooth muscle	ACTA2	sp|P62736|ACTA_HUMAN Actin, aortic smooth muscle OS=Homo sapiens OX=9606 GN=ACTA2 PE=1 SV=1	11462000	2835900000	341310	1671500000	1286000000	22008000	2288900	626260000	0	452150000	246850000	480220000	736770000	447690000	6930700000	196830000	83538000	649660000	5566100000	39021000	186900000	64706000	4014100	6268700	253420000	3179900000	64559000	184350000	453010000	349060000	9223900000	1798400	7774900000	3282700000	3617400	5646600000	890800000	15858000000	296100000	661450	12357000000	1470800000	549040000	1173000000	251810000
P60709	4	Actin, cytoplasmic 1;Actin, cytoplasmic 1, N-terminally processed	ACTB	sp|P60709|ACTB_HUMAN Actin, cytoplasmic 1 OS=Homo sapiens OX=9606 GN=ACTB PE=1 SV=1	848520000000	2096200000000	273700000000	587190000000	552450000000	344170000000	248920000000	965260000000	38977000000	1112700000000	425820000000	1760000000000	620380000000	2218700000000	1168800000000	1086900000000	381770000000	189310000000	3411000000000	330670000000	197480000000	736400000000	424440000000	608170000000	405370000000	1313500000000	661230000000	1227600000000	171900000000	2123400000000	3874700000000	197170000000	2039100000000	1112300000000	410690000000	975640000000	754750000000	1475000000000	1047300000000	208490000000	1312600000000	2553600000000	675790000000	297420000000	420100000000
A0A2R8YEA7	1	Isoform of P60709, Actin, cytoplasmic 1 (Fragment)	ACTB	tr|A0A2R8YEA7|A0A2R8YEA7_HUMAN Isoform of P60709, Actin, cytoplasmic 1 (Fragment) OS=Homo sapiens OX=9606 GN=ACTB PE=1 SV=1	29062000	45413000	0	19131000	0	5537100	0	32535000	0	94135000	0	3970600	2427400	543300000	0	0	239500	0	64100000	0	0	17032000	1793800	0	9778400	11688000	0	0	0	7828700	157250000	0	0	303450	129050000	0	0	503700000	0	0	0	0	0	0	0
Q562R1	1	Beta-actin-like protein 2	ACTBL2	sp|Q562R1|ACTBL_HUMAN Beta-actin-like protein 2 OS=Homo sapiens OX=9606 GN=ACTBL2 PE=1 SV=2	5950600000	13913000000	2636000000	3559000000	856340000	1228900000	2660000000	303190000	4480800	12073000000	269220000	10946000000	424250000	2357200000	12162000000	1416000000	165900000	5443800000	6293500000	707200000	597130000	2758700000	2756800000	667530000	484000000	6928100000	646440000	2968200000	293930000	3842500000	2104600000	358000000	352270000	8328100000	4321100000	181400000	451470000	1063500000	1223600000	151710000	5335000000	27310000000	656200000	24487000000	422300000
P63261;I3L3I0;I3L1U9	5	Actin, cytoplasmic 2;Actin, cytoplasmic 2, N-terminally processed	ACTG1	sp|P63261|ACTG_HUMAN Actin, cytoplasmic 2 OS=Homo sapiens OX=9606 GN=ACTG1 PE=1 SV=1;tr|I3L3I0|I3L3I0_HUMAN Isoform of P63261, Actin, cytoplasmic 2 (Fragment) OS=Homo sapiens OX=9606 GN=ACTG1 PE=1 SV=1;tr|I3L1U9|I3L1U9_HUMAN Isoform of P63261, Actin, cytop	1764200000	3386600000	412130000	946550000	166510000	313450000	172100000	818010000	1987900	1326300000	478110000	2484900000	63294000	3706500000	55603000	24140000	2546200	38761000	404160000	44662000	0	276030000	678700000	499600000	410450000	3587500000	356930000	47144000	5265000	33916000	522320000	9511400	1415900	2681700	2175400000	0	11517000	5025100000	19098000	2718700	61883000	111110000	2750400	5681300000	602390000
P63267;P63267-2	6	Actin, gamma-enteric smooth muscle	ACTG2	sp|P63267|ACTH_HUMAN Actin, gamma-enteric smooth muscle OS=Homo sapiens OX=9606 GN=ACTG2 PE=1 SV=1;sp|P63267-2|ACTH-2_HUMAN Isoform of P63267, Isoform 2 of Actin, gamma-enteric smooth muscle OS=Homo sapiens OX=9606 GN=ACTG2 PE=1 SV=1	11040000000	66635000000	2602600000	21772000000	10830000000	3440900000	1422900000	10083000000	79379000	13321000000	3244700000	11050000000	2292300000	5038800000	47859000000	2048900000	852990000	4979600000	37955000000	1891000000	1137100000	4601500000	6727100000	3550300000	8942700000	18294000000	26010000000	1544500000	3443000000	3083600000	74640000000	528220000	60668000000	14949000000	982610000	2963100000	3415100000	84848000000	2316300000	2479000000	1916900000	10731000000	1957900000	2729400000	8367600000
O96019;O96019-2	5	Actin-like protein 6A	ACTL6A	sp|O96019|ACL6A_HUMAN Actin-like protein 6A OS=Homo sapiens OX=9606 GN=ACTL6A PE=1 SV=1;sp|O96019-2|ACL6A-2_HUMAN Isoform of O96019, Isoform 2 of Actin-like protein 6A OS=Homo sapiens OX=9606 GN=ACTL6A PE=1 SV=1	1751500000	3188000000	272100000	1799600000	92572000	17171000	355580000	379360000	1287700	328290000	72667000	3852900000	278020000	1353600000	1100800000	289610000	197720000	21192000	2251400000	165470000	19765000	287780000	344910000	140480000	116530000	470060000	56229000	2019900000	42221000	4817200000	923970000	72465000	1245100000	496520000	43711000	130260000	107580000	275050000	402180000	47072000	186750000	842110000	55127000	187130000	416280000
P12814-3	1	Alpha-actinin-1	ACTN1	sp|P12814-3|ACTN1-3_HUMAN Isoform of P12814, Isoform 3 of Alpha-actinin-1 OS=Homo sapiens OX=9606 GN=ACTN1 PE=1 SV=2	210730000000	268140000000	47024000000	20133000000	34201000000	8326500000	6351400000	185070000000	11002000000	69546000000	15984000000	135850000000	88416000000	66980000000	102590000000	13461000000	7932200000	5772900000	443150000000	17253000000	4551100000	78442000000	28359000000	29693000000	31123000000	61202000000	13722000000	54153000000	8602100000	95123000000	247370000000	4816700000	139770000000	30112000000	4077200000	22828000000	11617000000	63180000000	38387000000	16238000000	42786000000	54176000000	9867200000	8487800000	14523000000
H9KV75	7		ACTN1	tr|H9KV75|H9KV75_HUMAN Isoform of P12814, Alpha-actinin-1 OS=Homo sapiens OX=9606 GN=ACTN1 PE=1 SV=1	84309000	26438000	13060000	0	667450	1001800	0	185630000	5830200	3913700	35753000	149870000	9970100	74103000	854280	3942700	1169900	8161400	35236000	0	0	0	3109800	1313000	3515400	21802000	1502900	23343000	0	6527700	540320000	0	33091000	20609000	8858200	4178200	1053500	17186000	6675200	0	0	20160000	20900000	9331100	7810700
P35609;F6THM6	4	Alpha-actinin-2	ACTN2	sp|P35609|ACTN2_HUMAN Alpha-actinin-2 OS=Homo sapiens OX=9606 GN=ACTN2 PE=1 SV=1;tr|F6THM6|F6THM6_HUMAN Isoform of P35609, Alpha-actinin-2 OS=Homo sapiens OX=9606 GN=ACTN2 PE=1 SV=1	11787000000	2498200000	886490000	217250000	379360000	92917000	413040000	4065500000	99192000	408600000	228440000	2470400000	2890300000	348060000	3632100000	694060000	517620000	18943000	7255100000	479240000	37754000	861920000	694190000	536320000	452360000	562010000	665440000	2705400000	310550000	5389300000	6736800000	41547000	663960000	2241700000	303720000	888550000	103320000	6645700000	1027600000	31835000	499360000	474820000	281140000	370680000	264320000
Q08043;A0A087WSZ2	2	Alpha-actinin-3	ACTN3	sp|Q08043|ACTN3_HUMAN Alpha-actinin-3 OS=Homo sapiens OX=9606 GN=ACTN3 PE=1 SV=2;tr|A0A087WSZ2|A0A087WSZ2_HUMAN Isoform of Q08043, Alpha-actinin-3 OS=Homo sapiens OX=9606 GN=ACTN3 PE=1 SV=1	192950000	89900000	6659000	115410000	25873000	903160	5846200	4855100	14910000	2569200	1638800	471320	125960000	52909000	614470000	322490000	111040000	1658700	303880000	0	1614500	26371000	0	4883900	0	6511300	2523200	151870000	0	22343000	838610000	1190600	54291000	28944000	14278000	22905000	110240000	155040000	49091000	1683300	25828000	4319100	4472700	6141800	0
O43707;F5GXS2	3	Alpha-actinin-4	ACTN4	sp|O43707|ACTN4_HUMAN Alpha-actinin-4 OS=Homo sapiens OX=9606 GN=ACTN4 PE=1 SV=2;tr|F5GXS2|F5GXS2_HUMAN Isoform of O43707, Alpha-actinin-4 OS=Homo sapiens OX=9606 GN=ACTN4 PE=1 SV=2	115740000000	58356000000	17005000000	14476000000	15411000000	3160700000	4306200000	67286000000	10215000000	21328000000	5386400000	44376000000	25183000000	50111000000	41049000000	6607800000	1107400000	2110300000	196610000000	15164000000	1566000000	39091000000	20607000000	12141000000	11581000000	18219000000	2141700000	31552000000	4175700000	69900000000	75495000000	2379300000	45841000000	12641000000	16649000000	8247700000	5036900000	25131000000	10388000000	7649700000	8184100000	27678000000	3176900000	18946000000	7819000000
H7C144	1		ACTN4	tr|H7C144|H7C144_HUMAN Isoform of O43707, Alpha-actinin-4 (Fragment) OS=Homo sapiens OX=9606 GN=ACTN4 PE=1 SV=1	4737500000	3923300000	640000000	122090000	284670000	168850000	124470000	3116200000	181970000	911080000	141760000	1916600000	486560000	961600000	1118800000	13800000	8834900	28656000	2827100000	343680000	12729000	1252400000	960330000	320360000	221580000	982710000	25821000	338660000	52902000	1000900000	1377000000	19663000	422130000	82059000	17027000	113940000	36732000	338460000	171490000	38025000	83983000	145980000	4729300	76354000	119530000
K7EJH8	1		ACTN4	tr|K7EJH8|K7EJH8_HUMAN Isoform of O43707, Alpha-actinin-4 (Fragment) OS=Homo sapiens OX=9606 GN=ACTN4 PE=1 SV=1	988050000	1486600000	245530000	77227000	27971000	17663000	28990000	920580000	19956000	677270000	29553000	1176700000	442920000	914770000	632630000	137740000	7954900	11693000	2335100000	95133000	10780000	476450000	252990000	100780000	49121000	470910000	4165800	349060000	25200000	1274100000	990570000	17902000	576140000	212610000	9115800	127010000	69344000	340800000	176220000	41394000	186310000	465680000	40088000	1338000	51329000
Q9NZ32;V9GYX7	4	Actin-related protein 10	ACTR10	sp|Q9NZ32|ARP10_HUMAN Actin-related protein 10 OS=Homo sapiens OX=9606 GN=ACTR10 PE=1 SV=1;tr|V9GYX7|V9GYX7_HUMAN Isoform of Q9NZ32, Actin-related protein 10 (Fragment) OS=Homo sapiens OX=9606 GN=ACTR10 PE=1 SV=1	259190000	1808600000	104310000	1426900000	428000000	486190000	10281000	461340000	0	1195200000	560110000	1160000000	1103800000	748500000	275290000	651250000	671970000	375250000	1642100000	13253000	238060000	592850000	55049000	17064000000	386700000	1870900000	1409300000	27291000	17119000	1074100000	3897500000	264730000	665000000	1295000000	78598000	1700200000	1738800000	2591600000	1632900000	418010000	2320300000	1760900000	454350000	97034000	352570000
P61163;R4GMT0	3	Alpha-centractin	ACTR1A	sp|P61163|ACTZ_HUMAN Alpha-centractin OS=Homo sapiens OX=9606 GN=ACTR1A PE=1 SV=1;tr|R4GMT0|R4GMT0_HUMAN Isoform of P61163, Alpha-centractin OS=Homo sapiens OX=9606 GN=ACTR1A PE=1 SV=1	1982800000	10108000000	1768100000	8669900000	2228000000	4800500000	547920000	4706100000	54602000	10104000000	5641100000	8375000000	9607300000	6876900000	5053600000	6741600000	8100200000	3111100000	19481000000	482700000	3015400000	8866100000	1373700000	2082800000	5308600000	13488000000	6207000000	1205300000	579360000	7785700000	50189000000	2201100000	13175000000	8150400000	3231200000	7735400000	16463000000	13312000000	15502000000	4127800000	16323000000	21806000000	6633300000	1776700000	2721100000
P42025	1	Beta-centractin	ACTR1B	sp|P42025|ACTY_HUMAN Beta-centractin OS=Homo sapiens OX=9606 GN=ACTR1B PE=1 SV=1	705950000	2428200000	238260000	2205700000	922470000	1441200000	53729000	1179600000	0	4699700000	1840100000	2079800000	3316500000	2036300000	835280000	1864100000	2287000000	1126700000	4490400000	22688000	891880000	2074000000	359090000	744370000	1080700000	4264100000	2008700000	262200000	197180000	1366700000	18887000000	624660000	2757400000	2430600000	2553800000	2334200000	4122100000	3494400000	5460600000	779520000	3807800000	3672600000	1439400000	324430000	941180000
P61160;F5H6T1	4	Actin-related protein 2	ACTR2	sp|P61160|ARP2_HUMAN Actin-related protein 2 OS=Homo sapiens OX=9606 GN=ACTR2 PE=1 SV=1;tr|F5H6T1|F5H6T1_HUMAN Isoform of P61160, Actin-related protein 2 OS=Homo sapiens OX=9606 GN=ACTR2 PE=1 SV=2	9939400000	20234000000	2878500000	4596400000	2852500000	2512100000	1151800000	6603900000	163450000	8444400000	3040600000	14137000000	2186200000	11051000000	5277400000	3288900000	1807600000	1319800000	17949000000	1773700000	539360000	6339900000	4225700000	3731900000	2991200000	8631000000	3546100000	6348000000	696530000	7013500000	19142000000	712440000	7649900000	3689100000	1669000000	3488300000	2922600000	7279900000	4049100000	1161400000	5848400000	9628000000	2084300000	1820500000	3573600000
P61158;B4DXW1	5	Actin-related protein 3	ACTR3	sp|P61158|ARP3_HUMAN Actin-related protein 3 OS=Homo sapiens OX=9606 GN=ACTR3 PE=1 SV=3;tr|B4DXW1|B4DXW1_HUMAN Isoform of P61158, Actin-related protein 3 OS=Homo sapiens OX=9606 GN=ACTR3 PE=1 SV=1	18540000000	31182000000	4700800000	11765000000	5057500000	4897200000	2447500000	15680000000	295330000	16919000000	7458000000	27514000000	4335000000	30471000000	16012000000	8614900000	3233200000	2572300000	158070000000	3830500000	1269500000	14993000000	7986600000	8162600000	6049200000	13577000000	6241300000	14664000000	1726000000	21947000000	45568000000	2022700000	15817000000	10069000000	4117300000	8715600000	5951300000	16971000000	10949000000	4122800000	18001000000	34283000000	4298100000	3999200000	6762300000
Q9P1U1;Q9P1U1-2;Q9P1U1-3	5	Actin-related protein 3B	ACTR3B	sp|Q9P1U1|ARP3B_HUMAN Actin-related protein 3B OS=Homo sapiens OX=9606 GN=ACTR3B PE=2 SV=1;sp|Q9P1U1-2|ARP3B-2_HUMAN Isoform of Q9P1U1, Isoform 2 of Actin-related protein 3B OS=Homo sapiens OX=9606 GN=ACTR3B PE=2 SV=1;sp|Q9P1U1-3|ARP3B-3_HUMAN Isoform of Q	2420900000	9042800000	1488000000	79605000	1286500000	762330000	276160000	3345900000	38918000	2894000000	1440300000	5790600000	1546700000	2789700000	2515700000	2003900000	760020000	638620000	6093500000	310760000	92056000	2289800000	2185300000	1701600000	951280000	3885600000	2128900000	1536100000	159560000	1839700000	10675000000	200420000	2879000000	1693700000	304170000	1580500000	5395000000	2434300000	1572200000	29848000	4254800000	5359700000	683660000	212210000	1527300000
Q8NER5;Q8NER5-3;Q8NER5-4;Q8NER5-2	4	Activin receptor type-1C	ACVR1C	sp|Q8NER5|ACV1C_HUMAN Activin receptor type-1C OS=Homo sapiens OX=9606 GN=ACVR1C PE=1 SV=1;sp|Q8NER5-3|ACV1C-3_HUMAN Isoform of Q8NER5, Isoform 3 of Activin receptor type-1C OS=Homo sapiens OX=9606 GN=ACVR1C PE=2 SV=1;sp|Q8NER5-4|ACV1C-4_HUMAN Isoform of Q	8459000	6609300	0	196630000	203330000	3573400	307930000	108100000	0	5094700	10359000	87125000	92370000	340010000	799950000	41786000	6179600	0	68748000	2561400	29788000	1096900000	18240000	136940000	348750000	51356000	14400000	7640600	425880000	55097000	26819000	36195000	5136600	0	45945000	0	4104000	33804000	67739000	16747000	9956400	583440000	2998900	25698000	0
A0A1B0GW23;Q03154;A0A1B0GU86;Q03154-4;Q03154-2;Q03154-3;A0A1B0GV31;A0A1B0GVA5	18	Aminoacylase-1	ACY1	tr|A0A1B0GW23|A0A1B0GW23_HUMAN Isoform of C9JMV9, ABHD14A-ACY1 readthrough (Fragment) OS=Homo sapiens OX=9606 GN=ABHD14A-ACY1 PE=4 SV=1;sp|Q03154|ACY1_HUMAN Aminoacylase-1 OS=Homo sapiens OX=9606 GN=ACY1 PE=1 SV=1;tr|A0A1B0GU86|A0A1B0GU86_HUMAN Isoform of	16648000000	785580000	88409000	204180000	154250000	34609000	47429000	472100000	2696100	164300000	73734000	444090000	1162200000	373180000	739770000	977030000	21429000	19414000	1271200000	174500000	482940000	211470000	678170000	55958000	232640000	3420400000	56468000	571490000	47696000	1147100000	5375600000	25681000	515650000	171370000	48532000	32065000	262170000	572870000	358490000	37806000	1630200000	404850000	75147000	298390000	320560000
Q96HD9	2	N-acyl-aromatic-L-amino acid amidohydrolase (carboxylate-forming)	ACY3	sp|Q96HD9|ACY3_HUMAN N-acyl-aromatic-L-amino acid amidohydrolase (carboxylate-forming) OS=Homo sapiens OX=9606 GN=ACY3 PE=1 SV=1	623770000	6026800000	176580000	316550000	95477000	675710000	411590000	2186800000	0	310450000	527930000	8105600000	140950000	375040000	655840000	668130000	460670000	41412000	3281900000	2648300000	9231300	901410000	2085000000	223560000	61116000	592240000	1991600000	1436500000	90193000	6411400000	93600000	0	701630000	201590000	126210000	23584000	981280000	301570000	444790000	40983000	189570000	2145700000	196790000	265320000	202690000
U3KQL2	2		ACYP2	tr|U3KQL2|U3KQL2_HUMAN Isoform of P14621, Acylphosphatase OS=Homo sapiens OX=9606 GN=ACYP2 PE=1 SV=1	114070000	68053000	18130000	53312000	10507000	15489000	8628800	28414000	157430	117390000	6193400	44516000	451190000	375480000	201070000	120190000	74606000	16668000	516190000	36112000	33703000	12766000	24792000	10886000	3871300	168390000	22103000	128900000	13165000	214600000	632180000	37953000	313010000	53561000	19938000	5890100	128020000	100130000	48144000	28143000	79539000	201570000	18707000	3551500	48193000
Q6DHV7;Q6DHV7-2	2	Adenosine deaminase-like protein	ADAL	sp|Q6DHV7|ADAL_HUMAN Adenosine deaminase-like protein OS=Homo sapiens OX=9606 GN=ADAL PE=2 SV=2;sp|Q6DHV7-2|ADAL-2_HUMAN Isoform of Q6DHV7, Isoform 2 of Adenosine deaminase-like protein OS=Homo sapiens OX=9606 GN=ADAL PE=2 SV=2	0	132020000	0	20153000	2308000	0	0	2699100	0	630550	996170	28187000	7864400	21520000	50477000	457630	8581600	606890	538600000	747640	0	0	6662000	3181900	0	5202100	4266000	5255800	0	22945000	23946000	361240	0	0	20289000	2783100	0	55737000	139260000	2966700	45597000	25974000	0	37475000	2022600
O14672;O14672-2	5	Disintegrin and metalloproteinase domain-containing protein 10	ADAM10	sp|O14672|ADA10_HUMAN Disintegrin and metalloproteinase domain-containing protein 10 OS=Homo sapiens OX=9606 GN=ADAM10 PE=1 SV=1;sp|O14672-2|ADA10-2_HUMAN Isoform of O14672, Isoform 2 of Disintegrin and metalloproteinase domain-containing protein 10 OS=Hom	2555300000	458920000	472940000	166090000	602440000	56713000	68459000	343800000	54427000	2344500000	140140000	1554500000	14160000	1633500000	1697600000	432170000	113670000	19910000	1995500000	311030000	6891800	196440000	99749000	262840000	56455000	17053000000	111250000	1220700000	3239000	2667000000	29542000000	71258000	844060000	2682300000	145020000	161080000	86878000	445230000	387780000	154150000	363530000	467330000	338780000	19643000	41011000
B4DKD2;O75078;K7EKA8;O75078-2	4	Disintegrin and metalloproteinase domain-containing protein 11	ADAM11	tr|B4DKD2|B4DKD2_HUMAN Isoform of O75078, Disintegrin and metalloproteinase domain-containing protein 11 OS=Homo sapiens OX=9606 GN=ADAM11 PE=1 SV=1;sp|O75078|ADA11_HUMAN Disintegrin and metalloproteinase domain-containing protein 11 OS=Homo sapiens OX=960	277080000	404030000	177440000	4530200	144520000	40808000	44236000	582760000	206120000	66998000	38490000	458620000	153500000	477040000	152170000	318960000	158810000	24860000	1233500000	68345000	8478800	278970000	48992000	97456000	25666000	143300000	44163000	276210000	9649400	1088800000	5687100000	2093000	15370000	143190000	23735000	63269000	5934200	296760000	90945000	14407000	167150000	573890000	24617000	2043300	82236000
Q13444-7;Q13444-6;Q13444-3;Q13444;Q13444-8;Q13444-2;Q13444-12;Q13444-5	9	Disintegrin and metalloproteinase domain-containing protein 15	ADAM15	sp|Q13444-7|ADA15-7_HUMAN Isoform of Q13444, Isoform 7 of Disintegrin and metalloproteinase domain-containing protein 15 OS=Homo sapiens OX=9606 GN=ADAM15 PE=1 SV=4;sp|Q13444-6|ADA15-6_HUMAN Isoform of Q13444, Isoform 6 of Disintegrin and metalloproteinase	100520000	18029000	21638000	10990000	1683100	0	10427000	15140000	6741700	353640	6578800	141800000	5938900	373540000	172370000	217860000	3793200	0	120590000	0	5786200	76870000	181100000	51989000	1992500000	93239000	11894000	182620000	0	93039000	130980000	0	36070000	104590000	828070000	141390000	115670000	121890000	46776000	188820000	70945000	77562000	59434000	12521000	153230000
Q9P0K1-2;Q9P0K1-5;Q9P0K1;F8WAD8;Q9P0K1-4;Q9P0K1-3	10	Disintegrin and metalloproteinase domain-containing protein 22	ADAM22	sp|Q9P0K1-2|ADA22-2_HUMAN Isoform of Q9P0K1, Isoform 2 of Disintegrin and metalloproteinase domain-containing protein 22 OS=Homo sapiens OX=9606 GN=ADAM22 PE=1 SV=1;sp|Q9P0K1-5|ADA22-5_HUMAN Isoform of Q9P0K1, Isoform 5 of Disintegrin and metalloproteinase	399420000	163320000	26257000	10997000	72707000	48811000	19320000	355630000	20035000	152730000	19298000	387030000	63362000	301720000	137350000	263190000	86660000	1610500	698260000	89450000	0	90034000	18669000	56115000	8415600	26193000	7743700	74199000	235980	685050000	487220000	5266200	249110000	1666600000	6898900	28620000	44044000	103420000	43161000	5720500	59249000	284400000	15203000	4642600	17389000
E7EWD3;O75077-3;O75077-2;O75077	5	Disintegrin and metalloproteinase domain-containing protein 23	ADAM23	tr|E7EWD3|E7EWD3_HUMAN Isoform of O75077, Disintegrin and metalloproteinase domain-containing protein 23 OS=Homo sapiens OX=9606 GN=ADAM23 PE=1 SV=2;sp|O75077-3|ADA23-3_HUMAN Isoform of O75077, Isoform Gamma of Disintegrin and metalloproteinase domain-cont	774720000	979980000	218200000	24259000	150810000	184800000	39466000	1272100000	307030000	455770000	34357000	587640000	450090000	784090000	879300000	213120000	70268000	21477000	2906700000	37821000	16021000	1022600000	19145000	112540000	52431000	150360000	489480000	176440000	24598000	359670000	940920000	9207400	323540000	222460000	13592000	234610000	95125000	232000000	470580000	12778000	34332000	858740000	37692000	894800	89656000
P58397-3;P58397	5	A disintegrin and metalloproteinase with thrombospondin motifs 12	ADAMTS12	sp|P58397-3|ATS12-3_HUMAN Isoform of P58397, Isoform 3 of A disintegrin and metalloproteinase with thrombospondin motifs 12 OS=Homo sapiens OX=9606 GN=ADAMTS12 PE=1 SV=2;sp|P58397|ATS12_HUMAN A disintegrin and metalloproteinase with thrombospondin motifs 1	57607000	289330000	2663300	258840000	10026000	40900000	16495000	273030000	9659600	214780000	6002700	64854000	85183000	179920000	178730000	62210000	11741000	5690200	137480000	0	10149000	125780000	24497000	40710000	15464000	211200000	45220000	27562000	1431800	342160000	122770000	137800000	30777000	252080000	48437000	19808000	67612000	51345000	161190000	86823000	184020000	64396000	67952000	12400000	20887000
Q8TE56;Q8TE56-2	3	A disintegrin and metalloproteinase with thrombospondin motifs 17	ADAMTS17	sp|Q8TE56|ATS17_HUMAN A disintegrin and metalloproteinase with thrombospondin motifs 17 OS=Homo sapiens OX=9606 GN=ADAMTS17 PE=2 SV=2;sp|Q8TE56-2|ATS17-2_HUMAN Isoform of Q8TE56, Isoform 2 of A disintegrin and metalloproteinase with thrombospondin motifs 1	5666900	10755000	5000700	12503000	21406000	0	3029800	45209000	1094800	0	21826000	42516000	611600000	35291000	289760000	175930000	2101100	2612500	62570000	7659400	1123500	8590400	1063800	39501000	2778000	51095000	66233000	0	7599100	303210000	574660000	18820000	61561000	18061000	0	4515900	134260000	196490000	214570000	8794100	40058000	304460000	7312600	8750700	5638300
O75689;H0Y7Q1;O75689-3;O75689-2;H7C4B3;H7BZT6	6	Arf-GAP with dual PH domain-containing protein 1	ADAP1	sp|O75689|ADAP1_HUMAN Arf-GAP with dual PH domain-containing protein 1 OS=Homo sapiens OX=9606 GN=ADAP1 PE=1 SV=2;tr|H0Y7Q1|H0Y7Q1_HUMAN Isoform of O75689, Arf-GAP with dual PH domain-containing protein 1 (Fragment) OS=Homo sapiens OX=9606 GN=ADAP1 PE=1 SV	1159600	2979700	1327600	0	1000800	2814700	3615600	6306300	4981800	10078000	5599900	7851700	0	37290000	12094000	38061000	0	0	176800000	8946200	0	2896000	2905800	210630000	478130	7527500	11109000	30893000	0	188320000	170380000	0	35991000	6115300	9782600	0	1421200	80725000	26481000	38108000	1622900	58859000	12700000	0	0
A0A3B3IRQ9;H0YCK3;P55265-3;P55265-2;P55265;P55265-4;P55265-5	10	Double-stranded RNA-specific adenosine deaminase	ADAR	tr|A0A3B3IRQ9|A0A3B3IRQ9_HUMAN Isoform of P55265, Double-stranded RNA-specific adenosine deaminase (Fragment) OS=Homo sapiens OX=9606 GN=ADAR PE=1 SV=1;tr|H0YCK3|H0YCK3_HUMAN Isoform of P55265, Double-stranded RNA-specific adenosine deaminase (Fragment) OS	72514000	357890000	1511900	20391000	6004100	0	90470000	7836700	2734400	24642000	10629000	375000000	45289000	257230000	176930000	83081000	34928000	4201500	128270000	3596800	749650	11335000	659430	209910000	1168300	76048000	19403000	123120000	1284100	24718000	1154800000	6443700	3543300000	32547000	3245700	50871000	371030000	38989000	24508000	6847700	464240000	244970000	36545000	178270000	0
Q8NI60-3;Q8NI60;Q8NI60-4;Q8NI60-2	4	Atypical kinase ADCK3, mitochondrial	ADCK3	sp|Q8NI60-3|COQ8A-3_HUMAN Isoform of Q8NI60, Isoform 3 of Atypical kinase COQ8A, mitochondrial OS=Homo sapiens OX=9606 GN=COQ8A PE=1 SV=1;sp|Q8NI60|COQ8A_HUMAN Atypical kinase COQ8A, mitochondrial OS=Homo sapiens OX=9606 GN=COQ8A PE=1 SV=1;sp|Q8NI60-4|COQ8	56611000	7557900	16072000	581110000	6366100	389150000	5089900	4251200	9283900	840050000	6897800	216360000	46364000	118000000	6603900	4578600	26252000	10743000	233180000	92425000	94697000	33791000	5088500	34837000	63014000	32446000	13284000	18899000	10302000	44293000	20677000	692790	231870000	166150000	35651000	10458000	18257000	126260000	209690000	25729000	247450000	446850000	13436000	1543500	5650300
Q96PN6;Q96PN6-4;Q96PN6-2	4	Adenylate cyclase type 10	ADCY10	sp|Q96PN6|ADCYA_HUMAN Adenylate cyclase type 10 OS=Homo sapiens OX=9606 GN=ADCY10 PE=1 SV=3;sp|Q96PN6-4|ADCYA-4_HUMAN Isoform of Q96PN6, Isoform 4 of Adenylate cyclase type 10 OS=Homo sapiens OX=9606 GN=ADCY10 PE=1 SV=3;sp|Q96PN6-2|ADCYA-2_HUMAN Isoform of	1094300000	437010000	14085000	271240000	26035000	3892100	215850000	124030000	29306000	106880000	11846000	90898000	58071000	840030000	1500500000	133050000	35206000	86843000	237700000	4211800	18472000	46417000	136820000	211950000	47783000	64237000	8586100000	161910000	197310000	1043400000	955460000	17296000	355100000	40882000	8140800	98369000	78137000	10735000000	1937500000	142500000	344160000	126670000	92560000	191260000	38324000
A0A0A0MSC1;O60266;U3KQ91;C9JLX3	8	Adenylate cyclase type 3	ADCY3	tr|A0A0A0MSC1|A0A0A0MSC1_HUMAN Isoform of O60266, Adenylate cyclase OS=Homo sapiens OX=9606 GN=ADCY3 PE=1 SV=1;sp|O60266|ADCY3_HUMAN Adenylate cyclase type 3 OS=Homo sapiens OX=9606 GN=ADCY3 PE=1 SV=3;tr|U3KQ91|U3KQ91_HUMAN Isoform of O60266, Adenylate cyc	91482000	73610000	3196800	37737000	49169000	56528000	15478000	164570000	5767500	154420000	51496000	106320000	119200000	378290000	236620000	520550000	146920000	4770900	792100000	6761700	10042000	166200000	277450000	32440000	27987000	259350000	104730000	125660000	15007000	154330000	1339700000	0	329840000	117070000	45334000	104020000	53688000	368850000	124430000	44762000	107250000	240550000	28407000	68827000	28703000
E7EVL1;P40145	3	Adenylate cyclase type 8	ADCY8	tr|E7EVL1|E7EVL1_HUMAN Isoform of P40145, Adenylate cyclase OS=Homo sapiens OX=9606 GN=ADCY8 PE=1 SV=1;sp|P40145|ADCY8_HUMAN Adenylate cyclase type 8 OS=Homo sapiens OX=9606 GN=ADCY8 PE=1 SV=1	412280000	578330000	45285000	22190000	267210000	0	60135000	45497000	0	49645000	18715000	71369000	54961000	38986000	875390000	132580000	0	33319000	735390000	26643000	47954000	127660000	23907000	1620000	2473400	85712000	7600500	508240	0	271930000	875510000	4111800	37073000	640720000	6509700	53150000	61402000	31648000	2262000	29814000	0	602680000	1118400	9959200	5154700
O60503	3	Adenylate cyclase type 9	ADCY9	sp|O60503|ADCY9_HUMAN Adenylate cyclase type 9 OS=Homo sapiens OX=9606 GN=ADCY9 PE=1 SV=4	40389000	481060000	0	88898000	28278000	54908000	2059600	51667000	0	370190000	20646000	75348000	353140000	116700000	298980000	39144000	21929000	1424900	104080000	7211400	6503900	90316000	15586000	91519000	16939000	36406000	55344000	126640000	584920	108990000	2329400000	593990	195610000	1790600000	53881000	79792000	1015900000	283640000	34515000	21274000	406240000	146130000	1006700000	185570000	95140000
P35611-4	1	Alpha-adducin	ADD1	sp|P35611-4|ADDA-4_HUMAN Isoform of P35611, Isoform 4 of Alpha-adducin OS=Homo sapiens OX=9606 GN=ADD1 PE=1 SV=2	26284000000	40079000000	5989600000	15932000000	11363000000	9787900000	5172300000	20647000000	3271500000	23591000000	9138400000	31860000000	17731000000	29835000000	27798000000	16707000000	7970000000	4340100000	76887000000	5774900000	3938400000	24727000000	9298400000	15664000000	9096200000	21263000000	11633000000	14859000000	3588600000	51796000000	80470000000	3923100000	40370000000	19879000000	5377600000	14216000000	11258000000	26580000000	21204000000	8337600000	28652000000	49075000000	9994400000	4096000000	8595900000
P35612;P35612-4;P35612-3;P35612-2;P35612-9	12	Beta-adducin	ADD2	sp|P35612|ADDB_HUMAN Beta-adducin OS=Homo sapiens OX=9606 GN=ADD2 PE=1 SV=3;sp|P35612-4|ADDB-4_HUMAN Isoform of P35612, Isoform 4 of Beta-adducin OS=Homo sapiens OX=9606 GN=ADD2 PE=1 SV=3;sp|P35612-3|ADDB-3_HUMAN Isoform of P35612, Isoform 3 of Beta-adduci	4330100000	10255000000	1909200000	2368800000	2949400000	3049400000	1254900000	5504600000	1072300000	5645000000	3947900000	9318700000	6704400000	8367100000	4408700000	4636000000	2086200000	1719800000	15582000000	1245200000	500280000	6365300000	2540400000	4651000000	2491800000	7578100000	4178400000	1675000000	990450000	9128200000	23591000000	1009100000	10112000000	7072200000	880680000	8115000000	3727700000	23807000000	9231000000	383240000	8439600000	11106000000	4552500000	808070000	3020600000
Q9UEY8-2	1	Gamma-adducin	ADD3	sp|Q9UEY8-2|ADDG-2_HUMAN Isoform of Q9UEY8, Isoform 1 of Gamma-adducin OS=Homo sapiens OX=9606 GN=ADD3 PE=1 SV=1	28087000000	31557000000	4105600000	15316000000	6838800000	5549100000	4039300000	12103000000	2279300000	13181000000	5345100000	23462000000	10689000000	26484000000	30242000000	14065000000	3694200000	2463400000	63864000000	3544800000	2674700000	17850000000	5551700000	10991000000	6854900000	12949000000	5384300000	13737000000	2027500000	53522000000	60106000000	2864900000	30207000000	14934000000	2599300000	9495600000	6353400000	119990000000	16011000000	7311300000	21494000000	36648000000	3835000000	5591500000	4753900000
A2A3C6;O60241-4;O60241-3;O60241-2;O60241;A2A3C4	7	Brain-specific angiogenesis inhibitor 2	ADGRB2;BAI2	tr|A2A3C6|A2A3C6_HUMAN Isoform of O60241, Adhesion G protein-coupled receptor B2 OS=Homo sapiens OX=9606 GN=ADGRB2 PE=1 SV=1;sp|O60241-4|AGRB2-4_HUMAN Isoform of O60241, Isoform 4 of Adhesion G protein-coupled receptor B2 OS=Homo sapiens OX=9606 GN=ADGRB2	25279000	102640000	1412800	44525000	8924600	21350000	0	22599000	1689400	5959400	6093100	378250000	201540000	282560000	119680000	121490000	24427000	9387500	467600000	132270000	15201000	26863000	29171000	37764000	20473000	26472000	3820900	61915000	16876000	176390000	342680000	21239000	561890000	142300000	42971000	3263600000	60732000	566100000	107810000	16754000	337150000	407910000	23408000	1646400	47534000
B1ALU3;O95490-2;O95490-5;B1ALU1;O95490;O95490-7;O95490-6;O95490-3;H0Y5C0	10	Latrophilin-2	ADGRL2;LPHN2	tr|B1ALU3|B1ALU3_HUMAN Isoform of O95490, Adhesion G protein-coupled receptor L2 OS=Homo sapiens OX=9606 GN=ADGRL2 PE=1 SV=1;sp|O95490-2|AGRL2-2_HUMAN Isoform of O95490, Isoform 2 of Adhesion G protein-coupled receptor L2 OS=Homo sapiens OX=9606 GN=ADGRL2	218360000	225840000	17772000000	288060000	16994000	27691000	48362000	405000000	3149600	49605000	9195100	120790000	284520000	255780000	127350000	121830000	67516000	282250000	1186500000	15491000	25808000	42146000	246570000	116100000	444530000	119610000	81126000	47724000	34873000	154350000	613170000	4077300	583950000	235000000	8134600	146280000	86204000	2703200000	140440000	37580000	302920000	120300000	3597300	60893000	44433000
E7EUW2;E7ETE3;E7EVD6;Q9HAR2-4;Q9HAR2;E7EW95;E9PBG4;E7EX52;E7EN28;E7EUP0;E7ESV6;E7ENK1;E7ES20;E7EMR3;Q9HAR2-2;Q9HAR2-3	17	Latrophilin-3	ADGRL3;LPHN3	tr|E7EUW2|E7EUW2_HUMAN Isoform of Q9HAR2, Adhesion G protein-coupled receptor L3 OS=Homo sapiens OX=9606 GN=ADGRL3 PE=1 SV=1;tr|E7ETE3|E7ETE3_HUMAN Isoform of Q9HAR2, Adhesion G protein-coupled receptor L3 OS=Homo sapiens OX=9606 GN=ADGRL3 PE=1 SV=1;tr|E7E	1598700000	880490000	247660000	182610000	942280000	159120000	69510000	1077000000	432350000	359130000	105470000	1416000000	732290000	2940000000	2396100000	489060000	66435000	57396000	4325700000	212060000	12417000	420320000	495090000	457420000	462910000	340600000	99110000	742290000	85622000	1511800000	4751100000	56951000	1135400000	1152100000	291730000	221160000	47726000	959620000	160820000	76171000	392040000	1601800000	106930000	105290000	138830000
P00325;V9HW50;P00325-2;D6RHZ6	6	Alcohol dehydrogenase 1B	ADH1B;HEL-S-117	sp|P00325|ADH1B_HUMAN Alcohol dehydrogenase 1B OS=Homo sapiens OX=9606 GN=ADH1B PE=1 SV=2;tr|V9HW50|V9HW50_HUMAN Isoform of P00325, Alcohol dehydrogenase 1B OS=Homo sapiens OX=9606 GN=ADH1B PE=1 SV=1;sp|P00325-2|ADH1B-2_HUMAN Isoform of P00325, Isoform 2 o	50188000	962560000	86323000	2155600000	180580000	62891000	19038000	715400000	873540	253380000	72451000	505770000	202400000	806230000	185360000	361370000	80668000	36418000	3902400000	26002000	24427000	390330000	3481700	112500000	82641000	72218000	24520000	362360000	11266000	685410000	3051900000	249060000	387390000	401030000	15415000	347360000	87406000	745890000	251740000	546640000	133860000	942760000	119430000	11448000	1389700000
A0A0D9SFB5;P08319;P08319-2;D6R9K8	6	Alcohol dehydrogenase 4	ADH4	tr|A0A0D9SFB5|A0A0D9SFB5_HUMAN Isoform of P08319, Alcohol dehydrogenase 4 OS=Homo sapiens OX=9606 GN=ADH4 PE=1 SV=1;sp|P08319|ADH4_HUMAN Alcohol dehydrogenase 4 OS=Homo sapiens OX=9606 GN=ADH4 PE=1 SV=5;sp|P08319-2|ADH4-2_HUMAN Isoform of P08319, Isoform 2	57615000	73127000	4105800	73282000	3755200	17609000	0	46877000	35359000	1947600	36827000	14237000	910230000	56136000	48467000	5985900	3196700	1408200	244330000	6501600	0	137420000	8525200	3446100	5208100	16882000	11301000	379180000	1897200	197050000	77411000	33090000	134190000	469390000	822180	12758000	10765000	90746000	142520000	3809400	15805000	212230000	146350000	841150	242820000
P11766;H0YAG8	5	Alcohol dehydrogenase class-3	ADH5	sp|P11766|ADHX_HUMAN Alcohol dehydrogenase class-3 OS=Homo sapiens OX=9606 GN=ADH5 PE=1 SV=4;tr|H0YAG8|H0YAG8_HUMAN Isoform of P11766, Alcohol dehydrogenase class-3 (Fragment) OS=Homo sapiens OX=9606 GN=ADH5 PE=1 SV=1	3510500000	10585000000	426940000	3192400000	474940000	246920000	387970000	461190000	189330000	21322000	292000000	1622400000	353910000	4456900000	4642400000	777100000	45420000	65302000	5225400000	808520000	36415000	673950000	1175200000	72270000	196880000	642000000	275690000	2902800000	113590000	7848800000	4976600000	115950000	1414500000	1434300000	225580000	276840000	545540000	708480000	432100000	296390000	702640000	4340300000	166570000	191100000	324080000
D6RH17;Q8IUN7;P28332;P28332-2	5	Alcohol dehydrogenase 6	ADH6	tr|D6RH17|D6RH17_HUMAN Isoform of P28332, Alcohol dehydrogenase 6 (Fragment) OS=Homo sapiens OX=9606 GN=ADH6 PE=1 SV=2;tr|Q8IUN7|Q8IUN7_HUMAN Isoform of P28332, ADH6 protein OS=Homo sapiens OX=9606 GN=ADH6 PE=1 SV=1;sp|P28332|ADH6_HUMAN Alcohol dehydrogena	6256100	713090000	387240000	169930000	0	1513300	0	66580000	0	1157000000	66469000	1126400000	37720000	17421000	6945200	39884000	5644100	5051100	866040000	37813000	1207900	0	353750000	193380000	758110	11572000	1984900	113700000	15535000	4089300000	42810000	0	35747000	4429300	18046000	715760000	65050000	127600000	18748000	0	199800000	5491400	0	5921800	5346600
A0A0C4DG85;P40394;P40394-2;E9PFG0	5	Alcohol dehydrogenase class 4 mu/sigma chain	ADH7	tr|A0A0C4DG85|A0A0C4DG85_HUMAN Isoform of P40394, Alcohol dehydrogenase class 4 mu/sigma chain OS=Homo sapiens OX=9606 GN=ADH7 PE=1 SV=1;sp|P40394|ADH7_HUMAN Alcohol dehydrogenase class 4 mu/sigma chain OS=Homo sapiens OX=9606 GN=ADH7 PE=1 SV=2;sp|P40394-2	99682000	876620000	4812900	121920000	36600000	36841000	38697000	139070000	1925500	69342000	156870000	65808000	584710000	916830000	1046000000	111450000	4730400	9271100	419530000	12077000	2330600	66389000	103330000	28769000	2176100000	377270000	32991000	2798800000	86606000	51941000	2468800000	0	259570000	37064000	61382000	315210000	43655000	263760000	639020000	345540000	163890000	241900000	57303000	376590000	66991000
P55263;P55263-2;P55263-3;P55263-4	4	Adenosine kinase	ADK	sp|P55263|ADK_HUMAN Adenosine kinase OS=Homo sapiens OX=9606 GN=ADK PE=1 SV=2;sp|P55263-2|ADK-2_HUMAN Isoform of P55263, Isoform 2 of Adenosine kinase OS=Homo sapiens OX=9606 GN=ADK PE=1 SV=2;sp|P55263-3|ADK-3_HUMAN Isoform of P55263, Isoform 3 of Adenosin	820460000	2274000000	200040000	852870000	307170000	312660000	220620000	834380000	5138200	820690000	669480000	1277300000	295900000	2576800000	1291800000	1175000000	146440000	32640000	5928600000	371470000	6138800	905380000	601370000	470890000	424080000	753460000	336550000	1005600000	71017000	4403100000	3692300000	82854000	1378700000	614840000	4909400000	321890000	346320000	1700600000	573490000	57618000	345980000	430740000	160210000	312460000	528550000
Q96SZ5	1	2-aminoethanethiol dioxygenase	ADO	sp|Q96SZ5|AEDO_HUMAN 2-aminoethanethiol dioxygenase OS=Homo sapiens OX=9606 GN=ADO PE=1 SV=2	1974300000	3111200000	736440000	177770000	369600000	279250000	606530000	1179500000	9358000	851770000	249140000	2205900000	428710000	2373000000	1266200000	964130000	95660000	105550000	4520400000	1334200000	38792000	1411300000	916410000	665370000	207970000	1061300000	540320000	3180600000	146860000	1921400000	3098000000	176450000	1058300000	802900000	32930000	165720000	195700000	825080000	951570000	69932000	690540000	1343800000	246860000	285880000	322860000
H3BRS6;Q9BRR6-2;Q9BRR6	6	ADP-dependent glucokinase	ADPGK	tr|H3BRS6|H3BRS6_HUMAN Isoform of Q9BRR6, ADP-dependent glucokinase (Fragment) OS=Homo sapiens OX=9606 GN=ADPGK PE=1 SV=1;sp|Q9BRR6-2|ADPGK-2_HUMAN Isoform of Q9BRR6, Isoform 2 of ADP-dependent glucokinase OS=Homo sapiens OX=9606 GN=ADPGK PE=1 SV=1;sp|Q9BR	61634000	103130000	460580	28455000	2480700	6475700	83203000	29974000	0	0	16307000	50605000	0	67930000	96193000	2014000	8884300	0	127100000	0	15436000	31587000	7504700	15645000	1934200	20174000	0	209510000	25480000	511490000	146230000	9503300	46924000	45533000	63943000	23423000	93797000	98455000	77171000	0	146350000	19399000	12341000	8982700	8310700
P54922;C9JZW7	2	[Protein ADP-ribosylarginine] hydrolase	ADPRH	sp|P54922|ADPRH_HUMAN [Protein ADP-ribosylarginine] hydrolase OS=Homo sapiens OX=9606 GN=ADPRH PE=1 SV=1;tr|C9JZW7|C9JZW7_HUMAN Isoform of P54922, [Protein ADP-ribosylarginine] hydrolase (Fragment) OS=Homo sapiens OX=9606 GN=ADPRH PE=1 SV=1	135210000	179200000	6201800	281130000	19640000	18584000	35667000	77972000	3723300	63613000	33009000	89856000	450520000	1492800000	135400000	23593000	1535200	3302500	409860000	11963000	1769300	474110000	44301000	31973000	24104000	52474000	46177000	66382000	5666100	403810000	19858000000	2582900	84859000	77127000	141590000	50324000	139320	116570000	156870000	42058000	44671000	119940000	2448600	413550000	44708000
A0A0U1RQK4	2	Isoform of Q8NDY3, [Protein ADP-ribosylarginine] hydrolase-like protein 1	ADPRHL1	tr|A0A0U1RQK4|A0A0U1RQK4_HUMAN Isoform of Q8NDY3, [Protein ADP-ribosylarginine] hydrolase-like protein 1 OS=Homo sapiens OX=9606 GN=ADPRHL1 PE=1 SV=1	56481000	38049000	2620300	5793000	41610000	38233000	13277000	94775000	0	12306000	5430400	111380000	480080000	19064000	23387000	866350000	843540	11365000	334480000	1435700	15050000	11443000	5283900	965060	0	18781000	19899000	25382000	3478800	91576000	374530000	0	140900000	493030000	0	140100000	43925000	80925000	50562000	1988400	26960000	584160000	73722000	3369100	7595100
Q9NX46	1	Poly(ADP-ribose) glycohydrolase ARH3	ADPRHL2	sp|Q9NX46|ARHL2_HUMAN ADP-ribose glycohydrolase ARH3 OS=Homo sapiens OX=9606 GN=ADPRHL2 PE=1 SV=1	835070000	580320000	167030000	1000100000	556310000	383160000	244150000	217210000	5087600	460780000	403360000	856240000	705570000	2218000000	391780000	1649800000	187050000	164370000	1194800000	305940000	80049000	713090000	581610000	617890000	1264000000	889060000	479840000	593920000	180170000	1787000000	697290000	184120000	1650100000	739140000	779820000	421110000	309280000	1335300000	803640000	354450000	318600000	548290000	450020000	555160000	671810000
V9GYR6;Q3LIE5-3;Q3LIE5	3	Manganese-dependent ADP-ribose/CDP-alcohol diphosphatase	ADPRM	tr|V9GYR6|V9GYR6_HUMAN Isoform of Q3LIE5, Manganese-dependent ADP-ribose/CDP-alcohol diphosphatase OS=Homo sapiens OX=9606 GN=ADPRM PE=1 SV=1;sp|Q3LIE5-3|ADPRM-3_HUMAN Isoform of Q3LIE5, Isoform 2 of Manganese-dependent ADP-ribose/CDP-alcohol diphosphatase	37835000	141980000	5420700	13719000	0	1042700	321350	11694000	71579000	167410000	2590000	23745000	93432000	77985000	223870000	1288700	4276400	0	389930000	0	0	32283000	30092000	28300000	520670000	21934000	546920	0	0	0	52519000	0	4992400	52427000	87690000	4642500	1088400	61423000	2139900	41658000	0	0	0	247470	26542000
P25098;E9PRV7	2	Beta-adrenergic receptor kinase 1	ADRBK1	sp|P25098|ARBK1_HUMAN Beta-adrenergic receptor kinase 1 OS=Homo sapiens OX=9606 GN=GRK2 PE=1 SV=2;tr|E9PRV7|E9PRV7_HUMAN Isoform of P25098, G protein-coupled receptor kinase OS=Homo sapiens OX=9606 GN=GRK2 PE=1 SV=1	11400000	57410000	1975900	10492000	0	32630000	1831200	10303000	7685900	13033000	227980000	13226000	22486000	1876400000	127270000	294980000	479860000	25038000	194500000	12833000	3507000	0	211830	6653900	19519000	7150100	0	44256000	0	128540000	133450000	0	276320000	84083000	44743000	39772000	15424000	35003000	38115000	264940000	33945000	91806000	7496900	28425000	38185000
Q16186	3	Proteasomal ubiquitin receptor ADRM1	ADRM1	sp|Q16186|ADRM1_HUMAN Proteasomal ubiquitin receptor ADRM1 OS=Homo sapiens OX=9606 GN=ADRM1 PE=1 SV=2	105200000	935750000	2686000	634910000	105110000	148970000	59181000	719570000	0	625310000	156040000	861730000	168380000	1440700000	209720000	181200000	139400000	54679000	488980000	44270000	10959000	62166000	151620000	521490000	313460000	519820000	294570000	27380000	19900000	224920000	270370000	15617000	465570000	62354000	170190000	21632000	750520000	1073300000	51993000	81277000	168310000	899340000	238780000	152870000	186800000
A0A1B0GWJ0;A0A1B0GTJ7;P30566;A0A0A6YY92;P30566-2;A0A1B0GWF8;A0A096LNY6;A0A1B0GTG9	15	Adenylosuccinate lyase	ADSL	tr|A0A1B0GWJ0|A0A1B0GWJ0_HUMAN Isoform of P30566, Adenylosuccinate lyase OS=Homo sapiens OX=9606 GN=ADSL PE=1 SV=1;tr|A0A1B0GTJ7|A0A1B0GTJ7_HUMAN Isoform of P30566, Adenylosuccinate lyase OS=Homo sapiens OX=9606 GN=ADSL PE=1 SV=1;sp|P30566|PUR8_HUMAN Adeny	2016700000	1092200000	118050000	1264300000	410910000	112660000	80234000	1466200000	7449900	543460000	461470000	679650000	199900000	1511400000	610080000	508050000	70920000	64522000	6576800000	155480000	40497000	1361300000	387210000	217990000	256910000	3253000000	409980000	1282900000	68127000	2453800000	1232200000	103990000	2247700000	378200000	48947000	391330000	189830000	1261300000	470550000	176500000	346020000	587550000	157280000	125210000	616570000
P30520	1	Adenylosuccinate synthetase isozyme 2	ADSS	sp|P30520|PURA2_HUMAN Adenylosuccinate synthetase isozyme 2 OS=Homo sapiens OX=9606 GN=ADSS PE=1 SV=3	120790000	1303700000	76710000	183120000	264840000	55608000	173650000	281870000	1641700	130520000	114870000	412330000	107180000	976860000	207560000	635000000	35930000	15986000	1288200000	30011000	28772000	207010000	304370000	144950000	61758000	288730000	79655000	21432000	6133500	873000000	4996100000	33351000	291500000	437490000	48336000	316590000	26049000	315540000	185720000	586480000	50226000	322130000	374260000	76927000	180780000
Q8N142	3	Adenylosuccinate synthetase isozyme 1	ADSSL1	sp|Q8N142|PURA1_HUMAN Adenylosuccinate synthetase isozyme 1 OS=Homo sapiens OX=9606 GN=ADSSL1 PE=1 SV=1	1564500	48391000	2078500	80470000	7900900	0	4342000	12205000	0	32982000	1698800	1006400	41414000	387790000	86744000	49344000	9883500	1918500	53581000	0	0	20267000	1867300	29189000	0	3809200	1434000	2700000	0	47727000	56295000	0	0	17543000	32078000	7094200	10914000	94847000	29371000	0	53932000	50487000	5693800	485940000	13815000
Q8IUX7	6	Adipocyte enhancer-binding protein 1	AEBP1	sp|Q8IUX7|AEBP1_HUMAN Adipocyte enhancer-binding protein 1 OS=Homo sapiens OX=9606 GN=AEBP1 PE=1 SV=1	235950000	465520000	38424000	499490000	278340000	9866300	18496000	1059900000	17933000	274660000	12769000	2089300000	182220000	726880000	512790000	76148000	641680000	80612000	4182500000	4415800	12407000	235840000	43182000	95101000	183150000	348980000	64991000	121480000	41507000	658470000	1391800000	4306700	1481400000	1168900000	67223000	611040000	98816000	838570000	76119000	396380000	152030000	909320000	22323000	33434000	141660000
Q8N4X5-2;Q8N4X5;Q8N4X5-4	5	Actin filament-associated protein 1-like 2	AFAP1L2	sp|Q8N4X5-2|AF1L2-2_HUMAN Isoform of Q8N4X5, Isoform 2 of Actin filament-associated protein 1-like 2 OS=Homo sapiens OX=9606 GN=AFAP1L2 PE=1 SV=1;sp|Q8N4X5|AF1L2_HUMAN Actin filament-associated protein 1-like 2 OS=Homo sapiens OX=9606 GN=AFAP1L2 PE=1 SV=1;	11719000	890670000	9635800	264950000	6492700	114330	23676000	27316000	4962700	27384000	643340	63448000	90318000	67329000	52614000	17966000	49434000	0	525060000	0	0	30619000	55026000	23105000	368210	14113000	5933100	20112000	17064	104190000	255230000	0	299930000	41424000	5041600	103130000	7954800	73131000	160150000	195960000	20032000	43112000	4416200	2046400	5543400
F5GXF9;P51825;P51825-3;P51825-2	6	AF4/FMR2 family member 1	AFF1	tr|F5GXF9|F5GXF9_HUMAN Isoform of P51825, AF4/FMR2 family member 1 OS=Homo sapiens OX=9606 GN=AFF1 PE=1 SV=2;sp|P51825|AFF1_HUMAN AF4/FMR2 family member 1 OS=Homo sapiens OX=9606 GN=AFF1 PE=1 SV=1;sp|P51825-3|AFF1-3_HUMAN Isoform of P51825, Isoform 3 of AF	63395000	184600000	3335400	39667000	11893000	16120000	0	18736000	0	270850000	18876000	9184300	642450000	689300000	280320000	187630000	90095000	45607000	706800000	0	0	7204800	7419700	297200000	13337000	25963000	8421300	100510000	0	579160000	153450000	0	207370000	49800000	12591000	122310000	187770000	37802000	288990000	11035000	109660000	141450000	14903000	11717000	17207000
Q9Y4W6	2	AFG3-like protein 2	AFG3L2	sp|Q9Y4W6|AFG32_HUMAN AFG3-like protein 2 OS=Homo sapiens OX=9606 GN=AFG3L2 PE=1 SV=2	12617000	21360000	6169900	15822000	19262000	86443000	23656000	28062000	0	1354700	1490100	119840000	574450000	119940000	260620000	82986000	2305400	5753700	2418100000	6268800	4544900	58612000	5928800	22166000	96809000	10102000	17649000	10354000	29440000	39626000	396460000	8711600	521730000	42747000	38672000	324000000	116100000	272920000	39432000	29638000	114040000	364830000	123090000	25700000	60884000
P43652	1	Afamin	AFM	sp|P43652|AFAM_HUMAN Afamin OS=Homo sapiens OX=9606 GN=AFM PE=1 SV=1	37887000	220120000	2253100	295110000	62796000	2311200	2676100	291040000	89280000	75250000	147790000	113530000	178790000	89887000	11799000	31205000	10605000	5825700	42714000	162880000	43669	84980000	29700000	11556000	6556700	1422900	68450000	45102000	11614000	161990000	29881000	0	22384000	62669000	2414200	41272000	7029200	62428000	14023000	32037000	20861000	29161000	12049000	752290	31199000
Q6ULP2-7;Q6ULP2-8;Q6ULP2-6;Q6ULP2;Q6ULP2-9;B8ZZI9	6	Aftiphilin	AFTPH	sp|Q6ULP2-7|AFTIN-7_HUMAN Isoform of Q6ULP2, Isoform 3 of Aftiphilin OS=Homo sapiens OX=9606 GN=AFTPH PE=1 SV=3;sp|Q6ULP2-8|AFTIN-8_HUMAN Isoform of Q6ULP2, Isoform 4 of Aftiphilin OS=Homo sapiens OX=9606 GN=AFTPH PE=1 SV=3;sp|Q6ULP2-6|AFTIN-6_HUMAN Isofor	52123000	40470000	25232000	30779000	9958800	52014000	25725000	8278600	381460	56847000	37474000	7754900	217450000	206930000	115770000	190410000	34514000	30663000	688060000	72744000	22544000	27719000	11249000	3757000	35886000	23057000	98847000	18035000	21319000	213100000	206550000	29103000	1228900000	95557000	0	25434000	155960000	101190000	183980000	4970100	68921000	98737000	6935000	0	6147000
P20933;H0Y9C7;H0Y8L9	3	N(4)-(beta-N-acetylglucosaminyl)-L-asparaginase;Glycosylasparaginase alpha chain;Glycosylasparaginase beta chain	AGA	sp|P20933|ASPG_HUMAN N(4)-(beta-N-acetylglucosaminyl)-L-asparaginase OS=Homo sapiens OX=9606 GN=AGA PE=1 SV=2;tr|H0Y9C7|H0Y9C7_HUMAN Isoform of P20933, N(4)-(beta-N-acetylglucosaminyl)-L-asparaginase (Fragment) OS=Homo sapiens OX=9606 GN=AGA PE=1 SV=8;tr|H	2622500	22971000	0	0	0	0	0	0	5350000	0	0	19902000	2048000	1293700000	0	4402100	0	12338000	0	0	0	0	422660	140200000	257430000	58094000	30247000	4029100	0	134190000	243900000	0	8845100	0	0	0	0	87047000	77716000	0	19394000	0	0	0	0
E7EUN2	1	Isoform of Q9UPQ3, Arf-GAP with GTPase, ANK repeat and PH domain-containing protein 1	AGAP1	tr|E7EUN2|E7EUN2_HUMAN Isoform of Q9UPQ3, Arf-GAP with GTPase, ANK repeat and PH domain-containing protein 1 OS=Homo sapiens OX=9606 GN=AGAP1 PE=1 SV=1	1022200000	1026000000	35275000	7883800	49226000	15179000	6686800	36241000	17788000	81137000	39452000	80655000	523850000	282600000	569270000	185250000	424120000	6653400	882750000	143190000	13687000	182940000	153520000	254780000	28128000	171600000	77352000	985720000	19393000	377100000	908630000	4044500	436920000	123560000	7389800	39355000	72035000	225230000	110150000	66046000	154500000	310450000	28362000	12010000	102850000
Q9UPQ3;Q9UPQ3-2;F5GXM9;A0A087X1U1;Q9UPQ3-3	14	Arf-GAP with GTPase, ANK repeat and PH domain-containing protein 1	AGAP1	sp|Q9UPQ3|AGAP1_HUMAN Arf-GAP with GTPase, ANK repeat and PH domain-containing protein 1 OS=Homo sapiens OX=9606 GN=AGAP1 PE=1 SV=4;sp|Q9UPQ3-2|AGAP1-2_HUMAN Isoform of Q9UPQ3, Isoform 2 of Arf-GAP with GTPase, ANK repeat and PH domain-containing protein 1	712770000	382370000	32645000	11278000	33253000	14713000	11364000	80957000	7894400	30247000	23685000	106550000	89130000	357220000	388780000	34494000	8046500	7940100	487510000	72462000	3156500	120000000	63256000	48023000	17899000	94702000	343550000	577680000	12284000	116380000	1450600000	8158800	53776000	32076000	1602000	20942000	120110000	60904000	63280000	4970200	27342000	533870000	33455000	46165000	21415000
Q99490;F8VVT9;J3KNM6	4	Arf-GAP with GTPase, ANK repeat and PH domain-containing protein 2	AGAP2	sp|Q99490|AGAP2_HUMAN Arf-GAP with GTPase, ANK repeat and PH domain-containing protein 2 OS=Homo sapiens OX=9606 GN=AGAP2 PE=1 SV=2;tr|F8VVT9|F8VVT9_HUMAN Isoform of Q99490, Arf-GAP with GTPase, ANK repeat and PH domain-containing protein 2 OS=Homo sapiens	596430000	962560000	164750000	212600000	390280000	227560000	639890000	526250000	1087200000	20649000	24826000	764340000	550760000	2586900000	127140000	408540000	14454000	12093000	4131600000	442410000	9320600	952910000	2431800	14479000	216320000	809610000	304890000	29585000	102760000	833890000	253140000	74771000	506000000	418220000	197860000	173910000	339300000	1005300000	298450000	143040000	755900000	2440300000	268400000	0	367640000
Q96P47;Q96P47-2;Q96P47-4;Q96P47-3;Q96P47-6;C9J975	7	Arf-GAP with GTPase, ANK repeat and PH domain-containing protein 3	AGAP3	sp|Q96P47|AGAP3_HUMAN Arf-GAP with GTPase, ANK repeat and PH domain-containing protein 3 OS=Homo sapiens OX=9606 GN=AGAP3 PE=1 SV=2;sp|Q96P47-2|AGAP3-2_HUMAN Isoform of Q96P47, Isoform 2 of Arf-GAP with GTPase, ANK repeat and PH domain-containing protein 3	9184700000	6250200000	1023600000	136960000	951310000	541450000	409020000	1719800000	36935000	763190000	652850000	3120800000	1393000000	2709300000	5808700000	1725500000	581560000	435680000	6478700000	2201400000	169670000	1927300000	2006500000	1446000000	1183300000	2481900000	919550000	7637600000	446810000	1201800000	11087000000	335000000	2502300000	1636300000	393980000	951430000	658460000	1395600000	1722400000	413270000	2591600000	1304500000	904470000	261050000	726430000
P35573	2	Glycogen debranching enzyme;4-alpha-glucanotransferase;Amylo-alpha-1,6-glucosidase	AGL	sp|P35573|GDE_HUMAN Glycogen debranching enzyme OS=Homo sapiens OX=9606 GN=AGL PE=1 SV=3	108300000000	44099000000	16632000000	8395000000	8251100000	4150400000	13747000000	65392000000	8753600000	16685000000	9066400000	47920000000	32551000000	90555000000	38974000000	8673600000	2776200000	2577000000	183540000000	4316900000	1005200000	18071000000	46102000000	22530000000	6971600000	36336000000	8279500000	12127000000	3313800000	31489000000	91245000000	2682900000	40616000000	12072000000	7293000000	10441000000	9496300000	31393000000	11801000000	5139500000	15156000000	25898000000	6426600000	5205000000	9582800000
Q9UL18;Q5TA58	3	Protein argonaute-1;Protein argonaute	AGO1	sp|Q9UL18|AGO1_HUMAN Protein argonaute-1 OS=Homo sapiens OX=9606 GN=AGO1 PE=1 SV=3;tr|Q5TA58|Q5TA58_HUMAN Isoform of Q9UL18, Protein argonaute-1 OS=Homo sapiens OX=9606 GN=AGO1 PE=1 SV=1	5960600000	2219300000	376320000	154920000	719190000	16555000	196200000	2562200000	352930000	336330000	42306000	1401000000	211810000	2103900000	1096100000	103540000	32553000	38680000	8672300000	216680000	47452000	1124100000	934740000	183880000	128960000	488710000	43332000	885800000	45648000	3658400000	3799400000	9607400	777310000	130390000	39853000	78747000	637660000	1842400000	505970000	52388000	1554200000	421120000	87518000	131650000	420080000
Q9UKV8;Q9UKV8-2	2	Protein argonaute-2	AGO2	sp|Q9UKV8|AGO2_HUMAN Protein argonaute-2 OS=Homo sapiens OX=9606 GN=AGO2 PE=1 SV=3;sp|Q9UKV8-2|AGO2-2_HUMAN Isoform of Q9UKV8, Isoform 2 of Protein argonaute-2 OS=Homo sapiens OX=9606 GN=AGO2 PE=1 SV=3	1682900000	479250000	57526000	16076000	50266000	6605900	39930000	1045400000	69280000	307850000	50401000	1311100000	215770000	243400000	349200000	35241000	12612000	2308500	1007300000	29534000	2833300	154860000	121130000	68399000	47155000	756750000	37847000	43970000	9572300	204700000	375590000	1181800	282280000	40848000	32807000	35426000	19149000	5560300000	233970000	9013900	287470000	74564000	10635000	26787000	44109000
Q9H9G7;Q9H9G7-2	4	Protein argonaute-3	AGO3	sp|Q9H9G7|AGO3_HUMAN Protein argonaute-3 OS=Homo sapiens OX=9606 GN=AGO3 PE=1 SV=2;sp|Q9H9G7-2|AGO3-2_HUMAN Isoform of Q9H9G7, Isoform 2 of Protein argonaute-3 OS=Homo sapiens OX=9606 GN=AGO3 PE=1 SV=2	455410000	225390000	63610000	55431000	2545300000	189160000	54003000	527330000	32016000	202430000	17409000	255970000	362900000	431200000	91136000	115000000	585220	8156500	429370000	5890100	97614	39631000	376150000	23983000	43189000	176650000	41503000	377410000	0	384330000	260170000	0	52608000	28452000	2042100	50432000	42752000	125780000	224300000	4069800	143620000	15868000	37877000	72996000	99467000
Q99943	1	1-acyl-sn-glycerol-3-phosphate acyltransferase alpha	AGPAT1	sp|Q99943|PLCA_HUMAN 1-acyl-sn-glycerol-3-phosphate acyltransferase alpha OS=Homo sapiens OX=9606 GN=AGPAT1 PE=1 SV=2	0	3296500	614530	1610000	0	0	0	407580	0	2104000	0	0	11908000	0	0	0	2626600	0	0	0	0	0	0	0	0	0	0	0	0	0	65691000	0	0	5272800	210640	2707000	10430000	0	12971000	3605700	0	40670000	662890	0	0
Q9NRZ7-2;Q9NRZ7;Q9NRZ7-3;C9JL26	5	1-acyl-sn-glycerol-3-phosphate acyltransferase gamma	AGPAT3	sp|Q9NRZ7-2|PLCC-2_HUMAN Isoform of Q9NRZ7, Isoform 2 of 1-acyl-sn-glycerol-3-phosphate acyltransferase gamma OS=Homo sapiens OX=9606 GN=AGPAT3 PE=1 SV=1;sp|Q9NRZ7|PLCC_HUMAN 1-acyl-sn-glycerol-3-phosphate acyltransferase gamma OS=Homo sapiens OX=9606 GN=A	18306000	19314000	0	75492000	0	401630	942740	53703000	4513600	103170000	310890	38484000	32392000	113860000	48390000	89870000	2718800	0	101890000	21312000	724040	9185000	0	0	9295500	12645000	0	89370000	8246400	43250000	316840000	6035900	163440000	35155000	1546700	51147000	54100000	185210000	149520000	211260000	67598000	132980000	492140000	4961800	11395000
Q9NUQ2	2	1-acyl-sn-glycerol-3-phosphate acyltransferase epsilon	AGPAT5	sp|Q9NUQ2|PLCE_HUMAN 1-acyl-sn-glycerol-3-phosphate acyltransferase epsilon OS=Homo sapiens OX=9606 GN=AGPAT5 PE=1 SV=3	19247000	52264000	0	24040000	0	0	0	0	773360	12238000	41880000	0	2009100	0	3984300	31069000	13075000	0	0	0	59398	1208500	0	4889800	4626600	25567000	0	0	0	42609000	243430000	508750	0	47085000	1327900	15688000	10782000	10937000	39629000	21771000	43814000	114650000	6886800	0	917830
O00468-6;O00468-3;O00468-7;O00468-5;O00468-4;O00468;A0A494C0G5;A0A087X208;A0A494C1I6;O00468-2	10	Agrin;Agrin N-terminal 110 kDa subunit;Agrin C-terminal 110 kDa subunit;Agrin C-terminal 90 kDa fragment;Agrin C-terminal 22 kDa fragment	AGRN	sp|O00468-6|AGRIN-6_HUMAN Isoform of O00468, Isoform 6 of Agrin OS=Homo sapiens OX=9606 GN=AGRN PE=1 SV=6;sp|O00468-3|AGRIN-3_HUMAN Isoform of O00468, Isoform 3 of Agrin OS=Homo sapiens OX=9606 GN=AGRN PE=1 SV=6;sp|O00468-7|AGRIN-7_HUMAN Isoform of O00468,	5431800000	4864900000	1357700000	2661900000	514850000	1316800000	1029500000	1670000000	11994000000	3971500000	1383100000	3135000000	21581000000	9584000000	13730000000	3143100000	579990000	1072000000	18223000000	477480000	534210000	6776500000	1024600000	484250000	458680000	5023100000	1446000000	11401000000	455620000	7041000000	10480000000	108430000	13271000000	3099000000	12911000000	12065000000	351470000	11533000000	409510000	1218900000	2341200000	11409000000	167870000	1069100000	617150000
P01019	1	Angiotensinogen;Angiotensin-1;Angiotensin-2;Angiotensin-3;Angiotensin-4;Angiotensin 1-9;Angiotensin 1-7;Angiotensin 1-5;Angiotensin 1-4	AGT	sp|P01019|ANGT_HUMAN Angiotensinogen OS=Homo sapiens OX=9606 GN=AGT PE=1 SV=1	2917700000	1335300000	48108000	1324200000	432070000	349370000	466040000	426770000	251770000	365310000	856380000	3708100000	234420000	3342400000	2920700000	499550000	108810000	3833200	2975500000	562380000	24038000	1009100000	521230000	647150000	795040000	253010000	101820000	2656400000	64943000	1574500000	1075900000	264470000	1940500000	1013900000	21914000	544000000	101470000	461280000	248380000	264980000	375830000	727310000	44136000	179350000	414870000
J3KNS1;Q9UPW5;Q9UPW5-3;Q9UPW5-2	4	Cytosolic carboxypeptidase 1	AGTPBP1	tr|J3KNS1|J3KNS1_HUMAN Isoform of Q9UPW5, Cytosolic carboxypeptidase 1 OS=Homo sapiens OX=9606 GN=AGTPBP1 PE=1 SV=1;sp|Q9UPW5|CBPC1_HUMAN Cytosolic carboxypeptidase 1 OS=Homo sapiens OX=9606 GN=AGTPBP1 PE=1 SV=3;sp|Q9UPW5-3|CBPC1-3_HUMAN Isoform of Q9UPW5,	1970300	134970000	0	144570000	30705000	9661700	547030000	13659000	0	4787700	4352500	103600000	200230000	698960000	200460000	56155000	24670000	0	184120000	38064000	0	45262000	0	2748500	4289500	20202000	5103800	459340000	2413800	8838500000	643310000	7043600	307710000	374590000	413970	200110000	334960000	215880000	162600000	3400700	2778500000	82697000	14888000	36231000	1075000
Q8WYP5-2;Q8WYP5;Q8WYP5-3	3	Protein ELYS	AHCTF1	sp|Q8WYP5-2|ELYS-2_HUMAN Isoform of Q8WYP5, Isoform 2 of Protein ELYS OS=Homo sapiens OX=9606 GN=AHCTF1 PE=1 SV=3;sp|Q8WYP5|ELYS_HUMAN Protein ELYS OS=Homo sapiens OX=9606 GN=AHCTF1 PE=1 SV=3;sp|Q8WYP5-3|ELYS-3_HUMAN Isoform of Q8WYP5, Isoform 3 of Protein	678440000	9057100000	14017000	71184000	40030000	20886000	100680000	71097000	359030000	37017000	59663000	44197000	459820000	768300000	449200000	742670000	102940000	24199000	408080000	61477000	2739300	99011000	27015000	82877000	405270000	57893000	66172000	407710000	0	548540000	650270000	223990000	560630000	168120000	26105000	37844000	243410000	1042700000	3206900000	2262100000	161890000	330580000	71872000	47118000	64926000
P23526;P23526-2	2	Adenosylhomocysteinase	AHCY	sp|P23526|SAHH_HUMAN Adenosylhomocysteinase OS=Homo sapiens OX=9606 GN=AHCY PE=1 SV=4;sp|P23526-2|SAHH-2_HUMAN Isoform of P23526, Isoform 2 of Adenosylhomocysteinase OS=Homo sapiens OX=9606 GN=AHCY PE=1 SV=4	73008000000	67544000000	10159000000	27743000000	15941000000	14096000000	12955000000	20046000000	3021400000	15898000000	15709000000	55104000000	18757000000	139860000000	49750000000	37630000000	10770000000	7782700000	140700000000	15582000000	2829800000	33137000000	29742000000	14164000000	11128000000	22768000000	16551000000	52519000000	5524800000	102240000000	100800000000	6282500000	59469000000	28553000000	8820300000	27695000000	28994000000	41395000000	26587000000	11575000000	32947000000	90455000000	17136000000	13049000000	17238000000
O43865;O43865-2	2	Putative adenosylhomocysteinase 2	AHCYL1	sp|O43865|SAHH2_HUMAN S-adenosylhomocysteine hydrolase-like protein 1 OS=Homo sapiens OX=9606 GN=AHCYL1 PE=1 SV=2;sp|O43865-2|SAHH2-2_HUMAN Isoform of O43865, Isoform 2 of S-adenosylhomocysteine hydrolase-like protein 1 OS=Homo sapiens OX=9606 GN=AHCYL1 PE	71083000000	91260000000	17064000000	30015000000	30143000000	11488000000	16151000000	37547000000	15534000000	68292000000	13882000000	46484000000	46385000000	113030000000	76328000000	76052000000	10719000000	17475000000	157390000000	14384000000	6768900000	50585000000	10287000000	13668000000	16191000000	49427000000	26822000000	65777000000	14039000000	77182000000	135640000000	13543000000	89845000000	44216000000	10898000000	18284000000	16982000000	49377000000	88080000000	17232000000	48709000000	153070000000	6426200000	10962000000	24458000000
Q96HN2-2	1	Putative adenosylhomocysteinase 3	AHCYL2	sp|Q96HN2-2|SAHH3-2_HUMAN Isoform of Q96HN2, Isoform 2 of Adenosylhomocysteinase 3 OS=Homo sapiens OX=9606 GN=AHCYL2 PE=1 SV=1	3338300000	3970200000	401200000	369070000	534130000	123170000	122070000	2241800000	223540000	3317300000	380710000	1962800000	62633000000	3267800000	1936900000	1514800000	148630000	491470000	5463600000	417580000	83282000	1528200000	483960000	337570000	570190000	2234100000	281180000	2203600000	121950000	2127000000	2840300000	139010000	2962100000	321290000	97234000	590170000	680830000	872620000	980260000	105740000	713710000	2014500000	247800000	74552000	806260000
Q5TGY3	1	AT-hook DNA-binding motif-containing protein 1	AHDC1	sp|Q5TGY3|AHDC1_HUMAN AT-hook DNA-binding motif-containing protein 1 OS=Homo sapiens OX=9606 GN=AHDC1 PE=1 SV=1	29260000	1518800000	1726600	6025000	4903100	8704100	3670900	59432000	8700100	210320000	20637000	7185200	129200000	214410000	76210000	21561000	55457000	41553000	213700000	4285100	4537800	15011000	10434000	41328000	5505000	50760000	8100800	56469000	0	687140000	1276000000	3421000	34100000	30997000	47241000	159560000	1583200000	392720000	181360000	69284000	125620000	1466400000	11903000	303760000	2880800
Q09666	7	Neuroblast differentiation-associated protein AHNAK	AHNAK	sp|Q09666|AHNK_HUMAN Neuroblast differentiation-associated protein AHNAK OS=Homo sapiens OX=9606 GN=AHNAK PE=1 SV=2	1132100000	2075500000	202190000	1076700000	1061600000	882170000	383760000	2419800000	198900000	1776700000	1360100000	543580000	7259500000	10173000000	2732700000	1709300000	1341900000	1025600000	5315000000	6976100000	373070000	990750000	1291600000	1201800000	2413900000	1951900000	892140000	1586100000	86487000	4012800000	10501000000	365450000	8439200000	1635400000	8193400000	1907700000	1303300000	128850000000	16583000000	561950000	2627400000	4312800000	539450000	11245000000	552260000
Q8IVF2;Q8IVF2-3	3	Protein AHNAK2	AHNAK2	sp|Q8IVF2|AHNK2_HUMAN Protein AHNAK2 OS=Homo sapiens OX=9606 GN=AHNAK2 PE=1 SV=2;sp|Q8IVF2-3|AHNK2-3_HUMAN Isoform of Q8IVF2, Isoform 3 of Protein AHNAK2 OS=Homo sapiens OX=9606 GN=AHNAK2 PE=1 SV=2	6337300000	10892000000	1990500000	4634200000	4323100000	5261000000	2696200000	4493100000	252910000	5535500000	4015600000	8786000000	5308800000	16142000000	2320500000	1269000000	4164000000	409340000	22872000000	521640000	1382600000	10020000000	3790200000	4253600000	3843400000	888360000	4551000000	9800200000	1019900000	8150000000	209340000000	1455100000	41865000000	8553700000	3436400000	6069900000	5450200000	12467000000	8788300000	518130000	9816600000	17866000000	1900400000	2805700000	7286900000
O95433;O95433-2	7	Activator of 90 kDa heat shock protein ATPase homolog 1	AHSA1	sp|O95433|AHSA1_HUMAN Activator of 90 kDa heat shock protein ATPase homolog 1 OS=Homo sapiens OX=9606 GN=AHSA1 PE=1 SV=1;sp|O95433-2|AHSA1-2_HUMAN Isoform of O95433, Isoform 2 of Activator of 90 kDa heat shock protein ATPase homolog 1 OS=Homo sapiens OX=96	27516000	5181000000	17608000	4744700000	2044700000	2124800000	613010000	636150000	1437200	1162900000	1371600000	191040000	762250000	24821000000	30505000	4183200000	867420000	1205100000	111500000	69856000	2235200000	1337900000	355070000	557220000	5657100000	993160000	696080000	15346000	184470000	7435300000	11039000000	1138400000	448350000	4375800000	947380000	2927200000	5345900000	30136000000	4416500000	35624000	3952800000	2316200000	3235700000	1304700000	2211700000
P02765;C9JV77	2	Alpha-2-HS-glycoprotein;Alpha-2-HS-glycoprotein chain A;Alpha-2-HS-glycoprotein chain B	AHSG	sp|P02765|FETUA_HUMAN Alpha-2-HS-glycoprotein OS=Homo sapiens OX=9606 GN=AHSG PE=1 SV=2;tr|C9JV77|C9JV77_HUMAN Isoform of P02765, Alpha-2-HS-glycoprotein OS=Homo sapiens OX=9606 GN=AHSG PE=1 SV=1	514870000	458310000	83449000	629390000	20822000	45442000	84906000	74637000	8422300	713070000	36521000	362700000	75278000	188890000	405080000	175370000	3483900	26263000	1832900000	1018600000	9754700	592090000	159420000	53096000	69984000	62990000	36691000	945420000	34934000	233050000	144070000	45634000	562270000	543580000	17127000	123650000	19809000	712350000	39809000	60707000	0	54860000	45090000	28113000	18393000
O95831;O95831-3;O95831-4;O95831-2	8	Apoptosis-inducing factor 1, mitochondrial	AIFM1	sp|O95831|AIFM1_HUMAN Apoptosis-inducing factor 1, mitochondrial OS=Homo sapiens OX=9606 GN=AIFM1 PE=1 SV=1;sp|O95831-3|AIFM1-3_HUMAN Isoform of O95831, Isoform 3 of Apoptosis-inducing factor 1, mitochondrial OS=Homo sapiens OX=9606 GN=AIFM1 PE=1 SV=1;sp|O	1707400000	2981500000	241380000	273900000	315440000	387010000	50284000	897820000	134790000	624230000	155940000	1427800000	1526500000	1149200000	611250000	138930000	359450000	279650000	4635300000	363060000	1349100000	655700000	752270000	69166000	249180000	305230000	53687000	4079200000	150780000	2686400000	9584300000	61587000	857060000	136240000	63211000	188000000	60798000	619390000	331830000	1188200000	382430000	1090100000	28296000	1166300	81791000
Q96NN9-3;Q96NN9-2;Q96NN9	5	Apoptosis-inducing factor 3	AIFM3	sp|Q96NN9-3|AIFM3-3_HUMAN Isoform of Q96NN9, Isoform 3 of Apoptosis-inducing factor 3 OS=Homo sapiens OX=9606 GN=AIFM3 PE=2 SV=1;sp|Q96NN9-2|AIFM3-2_HUMAN Isoform of Q96NN9, Isoform 2 of Apoptosis-inducing factor 3 OS=Homo sapiens OX=9606 GN=AIFM3 PE=2 SV=	651310000	6476700000	237190000	77709000	84911000	3476700	1776500	65045000	243060	182700000	6937300	2863300000	438490000	204530000	717370000	206840000	88199000	4738900	749720000	89580000	20776000	61730000	6205900	15012000	53715000	35537000	7870200	30012000	3862700	706860000	1173300000	15012000	412900000	140290000	12692000	63508000	376350000	461490000	478150000	2247600000	86861000	230520000	89094000	157700000	242720000
A0A0J9YWL0;Q9Y4K1	4	Absent in melanoma 1 protein	AIM1	tr|A0A0J9YWL0|A0A0J9YWL0_HUMAN Isoform of Q9Y4K1, Beta/gamma crystallin domain-containing protein 1 OS=Homo sapiens OX=9606 GN=CRYBG1 PE=1 SV=1;sp|Q9Y4K1|CRBG1_HUMAN Beta/gamma crystallin domain-containing protein 1 OS=Homo sapiens OX=9606 GN=CRYBG1 PE=1 S	95359000	319110000	235060000	534960000	45675000	18529000	29034000	240720000	20601000	446600000	140960000	754350000	803330000	704220000	316760000	101640000	93477000	3934500	4138200000	33290000	29012000	69443000	23697000	89949000	237280000	123480000	134630000	705580000	44934000	554820000	2324100000	4160500	700420000	390410000	1292200000	974880000	759160000	893030000	382480000	13379000	333920000	1621200000	130090000	391370000	543120000
E7ET48;Q8N1P7;E9PIR9	4	Absent in melanoma 1-like protein	AIM1L	tr|E7ET48|E7ET48_HUMAN Isoform of Q8N1P7, Beta/gamma crystallin domain-containing protein 2 OS=Homo sapiens OX=9606 GN=CRYBG2 PE=1 SV=2;sp|Q8N1P7|CRBG2_HUMAN Beta/gamma crystallin domain-containing protein 2 OS=Homo sapiens OX=9606 GN=CRYBG2 PE=2 SV=2;tr|E	1682500	22464000	50202000	10316000	15372000	11961000	2452800	128020000	607780	2036000	30847000	34550000	377930000	440950000	50598000	60932000	0	53425000	130630000	8933000	0	80480000	6731100	13445000	19888000	46762000	77187000	75510000	11556000	732450000	522600000	16975000	448030000	20876000	152930000	56273000	161180000	34581000	93884000	46116000	142470000	20328000	46715000	31584000	81825000
Q12904-2;Q12904	3	Aminoacyl tRNA synthase complex-interacting multifunctional protein 1;Endothelial monocyte-activating polypeptide 2	AIMP1	sp|Q12904-2|AIMP1-2_HUMAN Isoform of Q12904, Isoform 2 of Aminoacyl tRNA synthase complex-interacting multifunctional protein 1 OS=Homo sapiens OX=9606 GN=AIMP1 PE=1 SV=2;sp|Q12904|AIMP1_HUMAN Aminoacyl tRNA synthase complex-interacting multifunctional pro	0	147430000	3791600	708940000	270790000	47992000	1729900	97143000	0	77831000	128970000	55557000	64036000	659140000	25223000	194380000	328490000	61748000	1456400000	7187200	9768000	41618000	27569000	37683000	147800000	284030000	218170000	27589000	13539000	356850000	1097500000	111010000	93200000	80140000	185450000	24433000	463920000	756600000	275320000	218370000	396640000	19749000000	136390000	73361000	74793000
Q13155;Q13155-2;A8MU58	4	Aminoacyl tRNA synthase complex-interacting multifunctional protein 2	AIMP2	sp|Q13155|AIMP2_HUMAN Aminoacyl tRNA synthase complex-interacting multifunctional protein 2 OS=Homo sapiens OX=9606 GN=AIMP2 PE=1 SV=2;sp|Q13155-2|AIMP2-2_HUMAN Isoform of Q13155, Isoform 2 of Aminoacyl tRNA synthase complex-interacting multifunctional pro	81474000	406850000	28558000	905300000	160370000	111220000	15474000	160950000	0	203210000	178570000	276400000	430380000	336730000	70222000	219790000	302280000	110370000	953680000	4649400	99080000	140260000	63924000	119590000	246360000	344440000	301290000	18380000	19208000	461160000	936310000	42330000	370240000	275450000	84347000	40531000	308440000	11599000000	240230000	238140000	271230000	776130000	62928000	748560000	160650000
O00170;E9PMH2	3	AH receptor-interacting protein	AIP	sp|O00170|AIP_HUMAN AH receptor-interacting protein OS=Homo sapiens OX=9606 GN=AIP PE=1 SV=2;tr|E9PMH2|E9PMH2_HUMAN Isoform of O00170, Peptidylprolyl isomerase (Fragment) OS=Homo sapiens OX=9606 GN=AIP PE=1 SV=2	5467500	64752000	24209000	161710000	31794000	6142200	6938900	56347000	3216100	691390	29466000	8758000	137990000	42349000	80169000	7891200	110770000	17099000	315380000	7493900	64485000	50076000	2501300	12181000	17588000	43893000	25651000	45414000	0	95528000	153510000	6983100	133580000	65773000	20469000	72226000	188570000	122480000	75424000	5370200	70683000	37056000	46768000	51673000	5587700
P00568;Q5T9B7;H0YID2	3	Adenylate kinase isoenzyme 1	AK1	sp|P00568|KAD1_HUMAN Adenylate kinase isoenzyme 1 OS=Homo sapiens OX=9606 GN=AK1 PE=1 SV=3;tr|Q5T9B7|Q5T9B7_HUMAN Isoform of P00568, Adenylate kinase isoenzyme 1 OS=Homo sapiens OX=9606 GN=AK1 PE=1 SV=1;tr|H0YID2|H0YID2_HUMAN Isoform of P00568, Adenylate k	47975000	13676000	11426000	24931000	7355800	2640300	584780	19817000	0	87369000	6379500	24445000	176890000	178790000	70684000	104230000	4327500	2023200	297850000	5175000	15318000	4441300	4640200	19376000	60383000	35585000	7825100	39477000	7914200	556650000	287220000	5284400	123870000	50617000	91099000	21881000	10659000	114640000	83180000	43967000	120320000	312480000	7530600	358170000	2768600
F8VY04;F8W1A4;P54819-5;P54819-2;P54819;P54819-6	6	Adenylate kinase 2, mitochondrial;Adenylate kinase 2, mitochondrial;Adenylate kinase 2, mitochondrial, N-terminally processed	AK2	tr|F8VY04|F8VY04_HUMAN Isoform of P54819, Adenylate kinase 2, mitochondrial OS=Homo sapiens OX=9606 GN=AK2 PE=1 SV=1;tr|F8W1A4|F8W1A4_HUMAN Isoform of P54819, Adenylate kinase 2, mitochondrial OS=Homo sapiens OX=9606 GN=AK2 PE=1 SV=1;sp|P54819-5|KAD2-5_HUM	78449000	1309300	9654400	877740	247550	0	9990700	0	7571000	2436400	7174600	720490	54528000	112820000	3632500	61293000	730410	0	118440000	0	0	3940200	3148500	2468100	7974200	2680100	27887000	1133300	0	3789500	3594800	0	191480000	1627300	2056000000	4095300	0	157500000	0	491770	42863000	36831000	9906400	40829000	0
Q9UIJ7;Q9UIJ7-2;Q9UIJ7-3	3	GTP:AMP phosphotransferase AK3, mitochondrial	AK3	sp|Q9UIJ7|KAD3_HUMAN GTP:AMP phosphotransferase AK3, mitochondrial OS=Homo sapiens OX=9606 GN=AK3 PE=1 SV=4;sp|Q9UIJ7-2|KAD3-2_HUMAN Isoform of Q9UIJ7, Isoform 2 of GTP:AMP phosphotransferase AK3, mitochondrial OS=Homo sapiens OX=9606 GN=AK3 PE=1 SV=4;sp|Q	47889000	67332000	0	9509100	5008200	63651000	1214700	73886000	0	4095900	153050000	39241000	84506000	68502000	0	513310000	8492100	0	97563000	0	5291400	0	52258000	0	2756100	18169000	8576300	33532000	0	49053000	203850000	1455800	537250000	0	11963000	4683100	1128200	44952000	100030000	573460	0	56436000	0	3106300	9359300
P27144;D3DQ64	2	Adenylate kinase 4, mitochondrial	AK4	sp|P27144|KAD4_HUMAN Adenylate kinase 4, mitochondrial OS=Homo sapiens OX=9606 GN=AK4 PE=1 SV=1;tr|D3DQ64|D3DQ64_HUMAN Isoform of P27144, Adenylate kinase 4, mitochondrial OS=Homo sapiens OX=9606 GN=AK4 PE=1 SV=1	6357500	4859400	0	73972000	64709000	0	12015000	41295000	0	8483600	24134000	33740000	17204000	10641000	0	12316000	0	0	6559000	379610	4371800	37283000	0	0	148950000	8044200	0	326090000	0	5920300	15472000	0	15259000	3894600	5538000	718290	209400000	35332000	233670	0	10217000	59012000	13753000	594390	39038000
Q9Y6K8-3;Q9Y6K8;Q9Y6K8-2	6	Adenylate kinase isoenzyme 5	AK5	sp|Q9Y6K8-3|KAD5-3_HUMAN Isoform of Q9Y6K8, Isoform 3 of Adenylate kinase isoenzyme 5 OS=Homo sapiens OX=9606 GN=AK5 PE=1 SV=2;sp|Q9Y6K8|KAD5_HUMAN Adenylate kinase isoenzyme 5 OS=Homo sapiens OX=9606 GN=AK5 PE=1 SV=2;sp|Q9Y6K8-2|KAD5-2_HUMAN Isoform of Q9	52600000	113620000	8221300	13771000	25854000	1412800	10441000	52707000	0	70902000	16915000	25899000	82223000	220020000	265920000	170610000	19859000	4086800	357830000	1793900	25042000	43861000	28166000	8990000	8292700	14943000	31887000	56077000	44039	365620000	308010000	4556400	227750000	37912000	29223000	78674000	155280000	213070000	52715000	29137000	212930000	425730000	53798000	35869000	19184000
O43572;E7EMD6	3	A-kinase anchor protein 10, mitochondrial	AKAP10	sp|O43572|AKA10_HUMAN A-kinase anchor protein 10, mitochondrial OS=Homo sapiens OX=9606 GN=AKAP10 PE=1 SV=2;tr|E7EMD6|E7EMD6_HUMAN Isoform of O43572, A-kinase anchor protein 10, mitochondrial OS=Homo sapiens OX=9606 GN=AKAP10 PE=1 SV=3	8657400	2225800	41627000	31296000	805690	6108400	2567100	3733000	0	420470000	509260	13120000	29274000	373720000	8401200	21626000	1251100	2222200	110100000	0	0	3894500	22106000	559890	1509200000	89179000	1549300	18462000	0	6133900	88888000	0	58131000	53075000	237070	22384000	3492000	35691000	61689000	1446500	10230000	110020000	0	829430	19671000
Q9UKA4	1	A-kinase anchor protein 11	AKAP11	sp|Q9UKA4|AKA11_HUMAN A-kinase anchor protein 11 OS=Homo sapiens OX=9606 GN=AKAP11 PE=1 SV=1	92646000	11649000	4620400	5702000	34412000	8096100	1266900	2697000	0	1334700	7467600	4191100	12347000	7251100	589420000	156370000	93832000	0	184770000	0	31175000	5389200	0	536580	20828000	0	1543200	5896200	45888000	82065000	71706000	0	240940000	69252000	15145000	18490000	79479000	127130000	465540000	0	1064400000	240030000	21934000	48456000	0
Q02952-2;Q02952-3;Q02952	3	A-kinase anchor protein 12	AKAP12	sp|Q02952-2|AKA12-2_HUMAN Isoform of Q02952, Isoform 2 of A-kinase anchor protein 12 OS=Homo sapiens OX=9606 GN=AKAP12 PE=1 SV=4;sp|Q02952-3|AKA12-3_HUMAN Isoform of Q02952, Isoform 3 of A-kinase anchor protein 12 OS=Homo sapiens OX=9606 GN=AKAP12 PE=1 SV=	52829000	49877000	10661000	356000000	75173000	52487000	5855500	348110000	12571000	2187800000	265130000	318380000	887460000	913090000	42481000	384320000	405710000	277950000	268530000	2536700000	127150000	81754000	139700000	79503000	19714000	249860000	5764600000	7282600	15418000	214000000	1661500000	2444600	422050000	145760000	47239000	25428000	1115100000	920430000	2920100000	2554000000	284840000	550140000	213250000	950990000	107150000
Q12802-4;Q12802;Q12802-2;A0A087WTD7;A8MYJ1;A0A087WY36	9	A-kinase anchor protein 13	AKAP13	sp|Q12802-4|AKP13-4_HUMAN Isoform of Q12802, Isoform 3 of A-kinase anchor protein 13 OS=Homo sapiens OX=9606 GN=AKAP13 PE=1 SV=2;sp|Q12802|AKP13_HUMAN A-kinase anchor protein 13 OS=Homo sapiens OX=9606 GN=AKAP13 PE=1 SV=2;sp|Q12802-2|AKP13-2_HUMAN Isoform	34285000	108950000	16983000	30419000	175420000	10057000	3435600	57767000	159430000	173890000	10111000	48302000	73186000	54511000	503140000	33218000	12618000	3131600	183180000	9404100	4511000	198930000	4849000	11706000	16612000	45284000	106050000	34584000	1157400	108960000	44890000	13856000	24336000	12832000	69227000	354550000	40819000	374240000	162640000	101350000	165060000	158120000	210550000	55166000	18513000
P24588	1	A-kinase anchor protein 5	AKAP5	sp|P24588|AKAP5_HUMAN A-kinase anchor protein 5 OS=Homo sapiens OX=9606 GN=AKAP5 PE=1 SV=3	187430	14737000	35915000	2330800	8332100	11440000	10130000	164340000	6565400	164500000	8535200	2818700	33894000	215810000	63900000	97544000	280970000	35563000	4812200	0	230060	306500000	0	11133000	3117200	137000000	234600000	73061000	1242800	343420000	1274000000	0	74296000	81488000	32204000	15270000	429600000	373380000	84981000	0	271630000	15238000	181860000	37631000	36422000
Q13023;G3V3H7	3	A-kinase anchor protein 6	AKAP6	sp|Q13023|AKAP6_HUMAN A-kinase anchor protein 6 OS=Homo sapiens OX=9606 GN=AKAP6 PE=1 SV=3;tr|G3V3H7|G3V3H7_HUMAN Isoform of Q13023, A-kinase anchor protein 6 OS=Homo sapiens OX=9606 GN=AKAP6 PE=1 SV=1	172820000	105790000	4374900	38855000	6029700	35245000	6222500	58510000	532050	81059000	121240000	240500000	118150000	198110000	144140000	44271000	5798700	3018500	327300000	49224000	40464000	21549000	14410000	20733000	272930000	46592000	67055000	63694000	1750800	244380000	88040000	82904000	251480000	45102000	206680000	5773000	252510000	496210000	19232000	20990000	80442000	134420000	9884100	6286000	3030800
A0A0A0MRF6;Q99996-5;Q99996-3;Q99996;Q99996-1;Q99996-6;A0A0A0MRE9;Q99996-4	13	A-kinase anchor protein 9	AKAP9	tr|A0A0A0MRF6|A0A0A0MRF6_HUMAN Isoform of Q99996, A-kinase anchor protein 9 OS=Homo sapiens OX=9606 GN=AKAP9 PE=1 SV=1;sp|Q99996-5|AKAP9-5_HUMAN Isoform of Q99996, Isoform 5 of A-kinase anchor protein 9 OS=Homo sapiens OX=9606 GN=AKAP9 PE=1 SV=4;sp|Q99996-	316980000	202890000	195740000	60143000	72979000	396550000	48139000	176530000	6851900	330940000	337630000	885040000	170900000	2236500000	712230000	99231000	55296000	13705000	1323500000	58641000	65388000	295930000	92179000	95573000	106320000	43569000	148850000	41999000	48843000	683240000	2238100000	32242000	317170000	91592000	97610000	550620000	522790000	513600000	517570000	178570000	323110000	829870000	92238000	135210000	155870000
P14550	4	Alcohol dehydrogenase [NADP(+)]	AKR1A1	sp|P14550|AK1A1_HUMAN Aldo-keto reductase family 1 member A1 OS=Homo sapiens OX=9606 GN=AKR1A1 PE=1 SV=3	24192000	37034000	1600300	31554000	3038500	74866000	0	0	964440	2167900	273720	52932000	99144000	26445000	30940000	23221000	3727800	0	79507000	0	616150	0	4096500	0	43621000	0	3595800	28792000	0	78933000	118720000	0	158280000	26446000	80549000	18998000	12556000	349960000	75421000	3990900	18587000	0	6448300	95880000	9463900
P15121;E9PCX2	3	Aldose reductase	AKR1B1	sp|P15121|ALDR_HUMAN Aldo-keto reductase family 1 member B1 OS=Homo sapiens OX=9606 GN=AKR1B1 PE=1 SV=3;tr|E9PCX2|E9PCX2_HUMAN Isoform of P15121, Aldo-keto reductase family 1 member B1 OS=Homo sapiens OX=9606 GN=AKR1B1 PE=1 SV=1	4747900000	100000000	8009800	17569000	605910000	32010000	2471400	150290000	0	10257000	497860000	30711000	29687000	210010000	77925000	534580000	218250000	0	230030000	31864000	77147000	24851000	347980000	26204000	271440000	26505000	465940000	675390000	116960000	137430000000	380650000	94591000	32282000	834320000	220090000	1425000000	11043000	105590000	576660000	15724000	102250000	60537000	21250000	123820000	530980000
O60218	1	Aldo-keto reductase family 1 member B10	AKR1B10	sp|O60218|AK1BA_HUMAN Aldo-keto reductase family 1 member B10 OS=Homo sapiens OX=9606 GN=AKR1B10 PE=1 SV=2	5931900	19514000	89678	15735000	14206000	11081000	0	30370000	2197800	8922000	303100000	481200	16129000	245460000	3185200000	163680000	8520900	14962000	41702000	1877400	55624000	389010	5820300	79782000	105530000	1140800000	2791700	124970000	6846300	15659000	4061200000	6282800	580860000	833280000	12172000000	69813000	8070000	852030000	184800000	34152000	25530000	1485600000	0	42490000000	23636000
Q04828;H0Y804;A6NHU4	3	Aldo-keto reductase family 1 member C1	AKR1C1	sp|Q04828|AK1C1_HUMAN Aldo-keto reductase family 1 member C1 OS=Homo sapiens OX=9606 GN=AKR1C1 PE=1 SV=1;tr|H0Y804|H0Y804_HUMAN Isoform of Q04828, Aldo-keto reductase family 1 member C1 (Fragment) OS=Homo sapiens OX=9606 GN=AKR1C1 PE=1 SV=1;tr|A6NHU4|A6NHU	74862000	20658000	0	184350000	28429000	16180000	5353200	34963000	2478400	26447000	942150	2607000	73330000	389770000	153550000	104340000	21286000	49193000	326280000	7140100	10445000	66165000	7817600	19782000	220770000	49439000	11801000	24874000	6668700	96987000	291280000	7883600	365650000	82076000	103150000	161020000	12519000	398430000	84660000	96146000	219110000	375380000	133640000	250400000	28884000
B4DK69;P52895;S4R3P0	4	Aldo-keto reductase family 1 member C2	AKR1C2	tr|B4DK69|B4DK69_HUMAN Isoform of P52895, Aldo-keto reductase family 1 member C2 OS=Homo sapiens OX=9606 GN=AKR1C2 PE=1 SV=1;sp|P52895|AK1C2_HUMAN Aldo-keto reductase family 1 member C2 OS=Homo sapiens OX=9606 GN=AKR1C2 PE=1 SV=3;tr|S4R3P0|S4R3P0_HUMAN Iso	7918400	0	0	406100	0	738140	0	9078000	7531100	0	0	5803600	103570000	14121000	0	0	0	0	223100000	330960	0	0	0	0	14375000	12836000	7249100	46725000	0	19770000	34383000	0	3235400	16102000	7943300	118340000	0	283420000	50787000	0	37638000	38072000	3397400	0	1658200
O43488;H3BLU7	4	Aflatoxin B1 aldehyde reductase member 2	AKR7A2	sp|O43488|ARK72_HUMAN Aflatoxin B1 aldehyde reductase member 2 OS=Homo sapiens OX=9606 GN=AKR7A2 PE=1 SV=3;tr|H3BLU7|H3BLU7_HUMAN Isoform of O43488, Aflatoxin B1 aldehyde reductase member 2 (Fragment) OS=Homo sapiens OX=9606 GN=AKR7A2 PE=1 SV=1	18730000000	32678000000	3719300000	15660000000	7729400000	6299400000	8646800000	10648000000	267030000	10316000000	6824700000	29162000000	2330600000	24234000000	19805000000	10664000000	3358800000	2336900000	34074000000	2907100000	1481100000	10691000000	13097000000	8700800000	6392000000	16697000000	8089600000	5319400000	1884200000	28351000000	29136000000	1914000000	15849000000	7180300000	3505300000	4270800000	2158200000	7863300000	6281100000	4459900000	11196000000	23187000000	2557200000	9350000000	8180200000
O95154	1	Aflatoxin B1 aldehyde reductase member 3	AKR7A3	sp|O95154|ARK73_HUMAN Aflatoxin B1 aldehyde reductase member 3 OS=Homo sapiens OX=9606 GN=AKR7A3 PE=1 SV=2	1547000000	2002000000	61832000	222090000	130620000	104610000	151570000	28001000	0	64585000	125350000	312990000	110890000	851340000	386990000	589770000	63943000	45722000	2047200000	108800000	40813000	247470000	335980000	222630000	81743000	337110000	178520000	255140000	30175000	1143900000	1769200000	46970000	618880000	273530000	120250000	190770000	169350000	307670000	254400000	375890000	441570000	474780000	52045000	112920000	314040000
Q9Y243-2;Q9Y243	5	RAC-gamma serine/threonine-protein kinase	AKT3	sp|Q9Y243-2|AKT3-2_HUMAN Isoform of Q9Y243, Isoform 2 of RAC-gamma serine/threonine-protein kinase OS=Homo sapiens OX=9606 GN=AKT3 PE=1 SV=1;sp|Q9Y243|AKT3_HUMAN RAC-gamma serine/threonine-protein kinase OS=Homo sapiens OX=9606 GN=AKT3 PE=1 SV=1	25468000	31429000	2662400	140970000	52723000	13583000	32948000	6724800	26344000	7812700	87420000	20392000	166260000	159670000	75884000	388780000	79233000	221850000	207300000	15322000	6386500	25331000	27769000	33723000	356680000	91036000	23343000	20685000	183290000	727710000	597450000	0	390850000	100010000	5498600	71781000	44194000	126310000	127800000	0	72976000	43491000	56219000	34849000	68534000
Q9H8T0;Q9H8T0-2;H3BM79;H3BRV2	6	AKT-interacting protein	AKTIP	sp|Q9H8T0|AKTIP_HUMAN AKT-interacting protein OS=Homo sapiens OX=9606 GN=AKTIP PE=1 SV=1;sp|Q9H8T0-2|AKTIP-2_HUMAN Isoform of Q9H8T0, Isoform 2 of AKT-interacting protein OS=Homo sapiens OX=9606 GN=AKTIP PE=1 SV=1;tr|H3BM79|H3BM79_HUMAN Isoform of Q9H8T0,	166870000	77673000	3528400	36514000	111980000	136340000	62917000	60653000	0	358720000	357970000	307770000	203420000	1370600000	0	401880000	114110000	76545000	156450000	965090000	12540000	53354000	1444300000	163690000	72410000	108090000	96524000	30367000	21788000	197440000	180600000	63113000	176440000	146500000	46413000	73566000	286320000	238240000	167950000	38646000	1342800000	161140000	154510000	54469000	179770000
P13716	2	Delta-aminolevulinic acid dehydratase	ALAD	sp|P13716|HEM2_HUMAN Delta-aminolevulinic acid dehydratase OS=Homo sapiens OX=9606 GN=ALAD PE=1 SV=1	24631000000	43617000000	1954300000	19690000000	4405900000	6794700000	7170600000	13897000000	226150000	9515800000	6032800000	26109000000	5487900000	39681000000	23181000000	17616000000	3829600000	2604300000	31441000000	7011900000	1893600000	15450000000	11508000000	9185900000	4553000000	7012500000	7353300000	17458000000	2177100000	46123000000	32446000000	2716700000	23360000000	11663000000	5359200000	4173000000	3482100000	16479000000	9325300000	5498800000	11955000000	28413000000	3760100000	5091600000	8821400000
P02768;A0A0C4DGB6;H0YA55;D6RHD5;C9JKR2;P02768-2;P02768-3	7	Serum albumin	ALB	sp|P02768|ALBU_HUMAN Serum albumin OS=Homo sapiens OX=9606 GN=ALB PE=1 SV=2;tr|A0A0C4DGB6|A0A0C4DGB6_HUMAN Isoform of P02768, Serum albumin OS=Homo sapiens OX=9606 GN=ALB PE=1 SV=1;tr|H0YA55|H0YA55_HUMAN Isoform of P02768, Serum albumin (Fragment) OS=Homo	40428000000	3969600000	2332800000	5758100000	3063100000	2801500000	1913300000	3857300000	1766600000	10719000000	7651700000	58125000000	30939000000	52197000000	7057500000	13128000000	1431700000	4532100000	20982000000	6112900000	1240900000	13651000000	14345000000	4257300000	3658100000	2331300000	7678900000	4534900000	1961900000	35815000000	32691000000	1935000000	24341000000	176680000000	7292800000	36355000000	20909000000	81413000000	8537100000	3750500000	8540400000	17519000000	8323400000	6482500000	13419000000
Q13740-2;Q13740;F5GXJ9	5	CD166 antigen	ALCAM	sp|Q13740-2|CD166-2_HUMAN Isoform of Q13740, Isoform 2 of CD166 antigen OS=Homo sapiens OX=9606 GN=ALCAM PE=1 SV=2;sp|Q13740|CD166_HUMAN CD166 antigen OS=Homo sapiens OX=9606 GN=ALCAM PE=1 SV=2;tr|F5GXJ9|F5GXJ9_HUMAN Isoform of Q13740, CD166 antigen OS=Hom	684940000	371160000	54418000	38723000	161830000	60884000	61843000	576190000	26212000	227020000	49143000	168880000	159260000	157250000	246160000	13109000	21593000	12013000	1023000000	86664000	9667600	417610000	15916000	126670000	16385000	46314000	10579000	144880000	213760000	395690000	1174500000	6570400	197050000	91245000	11312000	120720000	20525000	110780000	689010000	49350000	59028000	304010000	33139000	107410000	304440000
Q8IZ83;F5H4B6	3	Aldehyde dehydrogenase family 16 member A1	ALDH16A1	sp|Q8IZ83|A16A1_HUMAN Aldehyde dehydrogenase family 16 member A1 OS=Homo sapiens OX=9606 GN=ALDH16A1 PE=1 SV=2;tr|F5H4B6|F5H4B6_HUMAN Isoform of Q8IZ83, Aldehyde dehydrogenase family 16 member A1 OS=Homo sapiens OX=9606 GN=ALDH16A1 PE=1 SV=1	3278200000	1662300000	366740000	553950000	700420000	356750000	833080000	995280000	1007100000	898590000	196450000	1773300000	2575100000	3437700000	1881700000	308590000	106020000	188640000	3178700000	298020000	165310000	1095800000	1340400000	1492100000	662360000	1542200000	254120000	868880000	131600000	2049100000	1126900000	53474000	1656500000	485750000	330710000	240550000	220090000	1143300000	1104400000	447710000	1100800000	1558800000	310720000	2432300000	544480000
P54886-2;P54886	2	Delta-1-pyrroline-5-carboxylate synthase;Glutamate 5-kinase;Gamma-glutamyl phosphate reductase	ALDH18A1	sp|P54886-2|P5CS-2_HUMAN Isoform of P54886, Isoform Short of Delta-1-pyrroline-5-carboxylate synthase OS=Homo sapiens OX=9606 GN=ALDH18A1 PE=1 SV=2;sp|P54886|P5CS_HUMAN Delta-1-pyrroline-5-carboxylate synthase OS=Homo sapiens OX=9606 GN=ALDH18A1 PE=1 SV=2	40046000	239120000	83766000	699000000	11368000	12577000	12087000	112470000	7230900	1733900000	31175000	141520000	251770000	427800000	1064300000	219910000	32106000	3901400	2147200000	46998000	14131000	254470000	21296000	21063000	3683300000	169360000	89697000	79871000	69205000	96702000	1221200000	2787500	1930900000	185100000	868560000	220530000	562590000	2120500000	262050000	25487000	45231000	1020900000	484710000	261430000	32909000
P00352	4	Retinal dehydrogenase 1	ALDH1A1	sp|P00352|AL1A1_HUMAN Retinal dehydrogenase 1 OS=Homo sapiens OX=9606 GN=ALDH1A1 PE=1 SV=2	81462000000	76895000000	8853700000	22549000000	9624300000	5793300000	12581000000	13380000000	4820700000	22861000000	8494700000	28874000000	18657000000	69240000000	32461000000	20681000000	9446600000	4580200000	63896000000	18863000000	1932600000	33561000000	25296000000	15343000000	12204000000	17754000000	15633000000	21175000000	2777400000	66330000000	53545000000	4098500000	37832000000	20503000000	10474000000	6369000000	9395300000	23120000000	10579000000	10531000000	30700000000	65558000000	4211300000	21037000000	12414000000
O94788;H0YMG7;O94788-2;O94788-3;O94788-4	7	Retinal dehydrogenase 2	ALDH1A2	sp|O94788|AL1A2_HUMAN Retinal dehydrogenase 2 OS=Homo sapiens OX=9606 GN=ALDH1A2 PE=1 SV=3;tr|H0YMG7|H0YMG7_HUMAN Isoform of O94788, Retinal dehydrogenase 2 OS=Homo sapiens OX=9606 GN=ALDH1A2 PE=1 SV=1;sp|O94788-2|AL1A2-2_HUMAN Isoform of O94788, Isoform 2	36308000	139290000	0	91052000	62260000	13292000	7512800	92674000	1493600	36299000	5794500	332100000	43853000	1775700000	56351000	78903000	5283400	6150400	430850000	6044900	0	91182000	102980000	7397700	482670000	872140000	3113300	3560800	3735200	88440000	202480000	0	75732000	5689300	70911000	17089000	1439600	26771000	151240000	19107000	159240000	96891000	3729000	18326000	55267000
P47895;H0Y2X5	4	Aldehyde dehydrogenase family 1 member A3	ALDH1A3	sp|P47895|AL1A3_HUMAN Aldehyde dehydrogenase family 1 member A3 OS=Homo sapiens OX=9606 GN=ALDH1A3 PE=1 SV=2;tr|H0Y2X5|H0Y2X5_HUMAN Isoform of P47895, Aldehyde dehydrogenase 1 family, member A3, isoform CRA_b OS=Homo sapiens OX=9606 GN=ALDH1A3 PE=1 SV=1	246790000	301540000	94656000	52118000	17072000	65018000	66095000	101600000	67026000	553380000	43421000	384610000	151230000	555500000	104610000	69066000	12331000	921290	661530000	145800000	6945500	49586000	392320000	35571000	1179800000	70115000	4686600	1561000000	4847400	30861000	104530000	4774400	65759000	79440000	29797000	220420000	55691000	544940000	33784000	6099800	11187000	11226000	6628900	2767800	69462000
P30837	2	Aldehyde dehydrogenase X, mitochondrial	ALDH1B1	sp|P30837|AL1B1_HUMAN Aldehyde dehydrogenase X, mitochondrial OS=Homo sapiens OX=9606 GN=ALDH1B1 PE=1 SV=3	12319000000	15657000000	1045900000	964290000	1275800000	298490000	270160000	3403200000	121770000	4898300000	466120000	9862500000	399260000	5561800000	1596000000	1691200000	154590000	195680000	6382700000	344790000	31155000	2723000000	1852200000	671330000	171870000	3054400000	249020000	2289600000	163880000	4256000000	5514300000	139120000	2591200000	1524300000	766960000	567440000	1316800000	2728500000	1078600000	1235000000	724000000	3703300000	306340000	604700000	758080000
O75891;O75891-3;O75891-2	10	Cytosolic 10-formyltetrahydrofolate dehydrogenase	ALDH1L1	sp|O75891|AL1L1_HUMAN Cytosolic 10-formyltetrahydrofolate dehydrogenase OS=Homo sapiens OX=9606 GN=ALDH1L1 PE=1 SV=2;sp|O75891-3|AL1L1-3_HUMAN Isoform of O75891, Isoform 3 of Cytosolic 10-formyltetrahydrofolate dehydrogenase OS=Homo sapiens OX=9606 GN=ALDH	54883000000	41155000000	3115600000	24418000000	39507000000	14346000000	9491400000	39396000000	17819000000	50861000000	22529000000	31302000000	103020000000	185230000000	118100000000	19800000000	10951000000	10678000000	109830000000	9245500000	5462500000	37843000000	28050000000	42909000000	36365000000	37837000000	18103000000	3441800000	20363000000	68925000000	108200000000	2355000000	81759000000	42696000000	13335000000	34158000000	27342000000	92688000000	47749000000	12383000000	46980000000	72289000000	17086000000	7986800000	30672000000
A0A494C1M4;Q3SY69	5	Mitochondrial 10-formyltetrahydrofolate dehydrogenase	ALDH1L2	tr|A0A494C1M4|A0A494C1M4_HUMAN Isoform of Q3SY69, Mitochondrial 10-formyltetrahydrofolate dehydrogenase OS=Homo sapiens OX=9606 GN=ALDH1L2 PE=4 SV=1;sp|Q3SY69|AL1L2_HUMAN Mitochondrial 10-formyltetrahydrofolate dehydrogenase OS=Homo sapiens OX=9606 GN=ALDH	4971000000	2215900000	215080000	661840000	2392100000	722330000	914810000	870840000	110180000	4155800000	1961400000	1585400000	6101300000	11518000000	3768100000	788270000	599990000	836780000	4426900000	598320000	286030000	2640400000	1873400000	1008700000	1209200000	1540300000	379630000	188080000	1158600000	2002200000	5865300000	117780000	4020600000	1693800000	975040000	1763900000	1084600000	4674500000	3217400000	382760000	1277300000	4294500000	496980000	588700000	1430700000
P05091	2	Aldehyde dehydrogenase, mitochondrial	ALDH2	sp|P05091|ALDH2_HUMAN Aldehyde dehydrogenase, mitochondrial OS=Homo sapiens OX=9606 GN=ALDH2 PE=1 SV=2	436610000000	440860000000	63590000000	63317000000	66133000000	43661000000	57406000000	179410000000	9175700000	102020000000	59313000000	326490000000	56717000000	327010000000	269480000000	85158000000	28556000000	18963000000	612440000000	71173000000	8613600000	124850000000	97726000000	82797000000	46673000000	116700000000	46093000000	293250000000	15191000000	201730000000	341270000000	14968000000	198210000000	83393000000	37811000000	89076000000	53968000000	124520000000	84184000000	55896000000	124080000000	290000000000	46545000000	35780000000	51954000000
C9JMC5;E9PNN6;P30838;I3L3I9;A8MYB8	8	Aldehyde dehydrogenase, dimeric NADP-preferring	ALDH3A1	tr|C9JMC5|C9JMC5_HUMAN Isoform of P30838, Aldehyde dehydrogenase, dimeric NADP-preferring (Fragment) OS=Homo sapiens OX=9606 GN=ALDH3A1 PE=1 SV=1;tr|E9PNN6|E9PNN6_HUMAN Isoform of P30838, Aldehyde dehydrogenase, dimeric NADP-preferring OS=Homo sapiens OX=9	0	0	0	5415300	847140	3884900	9107700	628210	0	49608000	2570300	9697600	1053800000	399240000	44300000	55980000	671990	5478700	94209000	1253900	964660	9451000	1259300	15959000	109890000	618640	4475200	15956000	615940	19246000	184350000	201230	2356800	1222600	144850000	0	0	315730000	9874100	1920700	91017000	96386000	6347000	18669000	5456000
J3QRD1;P51648;P51648-2	11	Fatty aldehyde dehydrogenase	ALDH3A2	tr|J3QRD1|J3QRD1_HUMAN Isoform of P51648, Fatty aldehyde dehydrogenase OS=Homo sapiens OX=9606 GN=ALDH3A2 PE=1 SV=1;sp|P51648|AL3A2_HUMAN Fatty aldehyde dehydrogenase OS=Homo sapiens OX=9606 GN=ALDH3A2 PE=1 SV=1;sp|P51648-2|AL3A2-2_HUMAN Isoform of P51648,	238890000	268570000	11408000	212120000	67633000	40534000	104230000	93542000	225680000	121360000	74650000	81054000	1631100000	1554900000	71642000	68586000	179150000	84758000	1164100000	43913000	120800000	47377000	60444000	391510000	310030000	118890000	592660000	678740000	8744800	1287600000	2543500000	16512000	385260000	668390000	528840000	375630000	89581000	1150600000	1311100000	93244000	610090000	1302400000	9819400	349760000	20706000
P30038;P30038-3;P30038-2	4	Delta-1-pyrroline-5-carboxylate dehydrogenase, mitochondrial	ALDH4A1	sp|P30038|AL4A1_HUMAN Delta-1-pyrroline-5-carboxylate dehydrogenase, mitochondrial OS=Homo sapiens OX=9606 GN=ALDH4A1 PE=1 SV=3;sp|P30038-3|AL4A1-3_HUMAN Isoform of P30038, Isoform 3 of Delta-1-pyrroline-5-carboxylate dehydrogenase, mitochondrial OS=Homo s	290740000	85715000	27337000	24243000	1489000000	2674000	10545000	200760000	840320000	41656000	41231000	336640000	56003000	209290000	41541000	115280000	864030	377740000	480810000	282360000	25889000	33213000	134840000	96694000	30557000	139490000	77271000	77710000	558490	298090000	874010000	534910000	106650000	1607200	22512000	46193000	13482000	53779000	1627100000	1571900000	4388700	317740000	0	61876000	27490000
P51649-2;P51649;C9J8Q5	3	Succinate-semialdehyde dehydrogenase, mitochondrial	ALDH5A1	sp|P51649-2|SSDH-2_HUMAN Isoform of P51649, Isoform 2 of Succinate-semialdehyde dehydrogenase, mitochondrial OS=Homo sapiens OX=9606 GN=ALDH5A1 PE=1 SV=2;sp|P51649|SSDH_HUMAN Succinate-semialdehyde dehydrogenase, mitochondrial OS=Homo sapiens OX=9606 GN=AL	2509800000	2143700000	485000000	310460000	882600000	173880000	235170000	927400000	50818000	521300000	877160000	5307600000	582390000	2293600000	1539500000	1331000000	280820000	272880000	4884000000	661880000	44721000	1053700000	532770000	282510000	167460000	5415400000	583160000	2708800000	149030000	1829800000	3139000000	163160000	1793600000	487740000	535090000	663370000	2484900000	2672700000	2055400000	175560000	2913500000	2955100000	574380000	344580000	622470000
Q02252;Q02252-2	3	Methylmalonate-semialdehyde dehydrogenase [acylating], mitochondrial	ALDH6A1	sp|Q02252|MMSA_HUMAN Methylmalonate-semialdehyde dehydrogenase [acylating], mitochondrial OS=Homo sapiens OX=9606 GN=ALDH6A1 PE=1 SV=2;sp|Q02252-2|MMSA-2_HUMAN Isoform of Q02252, Isoform 2 of Methylmalonate-semialdehyde dehydrogenase [acylating], mitochond	9719200000	10005000000	1552100000	5802300000	11354000000	2016200000	2252200000	2358400000	304890000	2431200000	10236000000	10078000000	6726000000	20551000000	18491000000	10544000000	3186800000	1966100000	40145000000	833500000	544500000	9325000000	7469200000	5798700000	3387800000	8983300000	9384700000	2127700000	1211800000	16712000000	201940000000	1216000000	18391000000	9871100000	535870000	15680000000	5524700000	9635200000	8527200000	2374000000	5394700000	21038000000	3210600000	1483400000	10229000000
P49419-2	1	Isoform 2 of Alpha-aminoadipic semialdehyde dehydrogenase	ALDH7A1	sp|P49419-2|AL7A1-2_HUMAN Isoform of P49419, Isoform 2 of Alpha-aminoadipic semialdehyde dehydrogenase OS=Homo sapiens OX=9606 GN=ALDH7A1 PE=1 SV=5	16665000000	34863000000	3407500000	51941000000	28357000000	31984000000	22679000000	8671600000	2128900000	18505000000	36572000000	21864000000	28933000000	160020000000	130810000000	31498000000	13227000000	9699000000	135980000000	2386400000	4890400000	34570000000	34674000000	21078000000	28092000000	41742000000	17906000000	8810300000	6408800000	135800000000	56557000000	13837000000	71440000000	80179000000	18302000000	31640000000	27145000000	60239000000	45926000000	34785000000	134190000000	171240000000	14039000000	24433000000	31377000000
A0A1B0GTG2;A0A1B0GTY9;A0A0J9YWF7	11	Isoform of P49419, Alpha-aminoadipic semialdehyde dehydrogenase	ALDH7A1	tr|A0A1B0GTG2|A0A1B0GTG2_HUMAN Isoform of P49419, Alpha-aminoadipic semialdehyde dehydrogenase OS=Homo sapiens OX=9606 GN=ALDH7A1 PE=1 SV=1;tr|A0A1B0GTY9|A0A1B0GTY9_HUMAN Isoform of P49419, Alpha-aminoadipic semialdehyde dehydrogenase OS=Homo sapiens OX=96	35864000	434310000	2078900	117910000	7609000	10008000	14359000	10851000	316650	882580000	23664000	23751000	29964000	74941000	16495000	1503900	3048400	0	45203000	0	96070	17030000	3023600	14380000	8670400	41904000	18755000	0	0	8385000	176680000	178120	63546000	1284600	28339000	416940	14348000	11379000	2843300	49681000	52695000	751440000	0	3934700	15772000
P49189-3	1	4-trimethylaminobutyraldehyde dehydrogenase	ALDH9A1	sp|P49189-3|AL9A1-3_HUMAN Isoform of P49189, Isoform 3 of 4-trimethylaminobutyraldehyde dehydrogenase OS=Homo sapiens OX=9606 GN=ALDH9A1 PE=1 SV=3	361010000000	266580000000	35167000000	69645000000	49492000000	25666000000	52156000000	137250000000	4467200000	58783000000	30033000000	197850000000	28349000000	323410000000	196820000000	56124000000	13373000000	15064000000	520350000000	61914000000	7869200000	127740000000	88527000000	38142000000	40864000000	93323000000	23537000000	229820000000	13646000000	326000000000	304450000000	15552000000	139570000000	65965000000	22584000000	37010000000	39135000000	63272000000	47177000000	42647000000	87660000000	283640000000	25035000000	26978000000	25827000000
P49189;P49189-2	2	4-trimethylaminobutyraldehyde dehydrogenase	ALDH9A1	sp|P49189|AL9A1_HUMAN 4-trimethylaminobutyraldehyde dehydrogenase OS=Homo sapiens OX=9606 GN=ALDH9A1 PE=1 SV=3;sp|P49189-2|AL9A1-2_HUMAN Isoform of P49189, Isoform 2 of 4-trimethylaminobutyraldehyde dehydrogenase OS=Homo sapiens OX=9606 GN=ALDH9A1 PE=1 SV=	4434200000	4894100000	521320000	1049700000	816700000	238000000	629770000	1191600000	65726000	491080000	246140000	2740600000	421580000	3484300000	2007700000	764450000	297780000	238680000	7088500000	1249600000	64202000	2037900000	1133500000	296310000	365910000	975530000	335360000	2590700000	183030000	3094700000	3825900000	297750000	1825900000	1101000000	432740000	381170000	584780000	1074900000	717240000	628070000	1024800000	3972300000	415990000	427460000	276490000
P04075;J3KPS3;H3BQN4;H3BUH7	6	Fructose-bisphosphate aldolase A;Fructose-bisphosphate aldolase	ALDOA	sp|P04075|ALDOA_HUMAN Fructose-bisphosphate aldolase A OS=Homo sapiens OX=9606 GN=ALDOA PE=1 SV=2;tr|J3KPS3|J3KPS3_HUMAN Isoform of P04075, Fructose-bisphosphate aldolase OS=Homo sapiens OX=9606 GN=ALDOA PE=1 SV=1;tr|H3BQN4|H3BQN4_HUMAN Isoform of P04075,	817620000	1326600000	391990000	753130000	332490000	150040000	90464000	905450000	13526000	354500000	605580000	1579000000	3819300000	4371400000	775260000	3380100000	171970000	152660000	2866600000	537950000	57356000	472990000	488390000	492450000	3449600000	889910000	687390000	1128900000	146000000	626420000	4894000000	73734000	1747400000	596060000	2520900000	971610000	411550000	8186500000	1442600000	358240000	455300000	1194700000	341240000	8456400000	1015700000
A0A3B3IS80;P05062;A0A087WXX2	4	Fructose-bisphosphate aldolase B;Fructose-bisphosphate aldolase	ALDOB	tr|A0A3B3IS80|A0A3B3IS80_HUMAN Isoform of P05062, Fructose-bisphosphate aldolase OS=Homo sapiens OX=9606 GN=ALDOB PE=1 SV=1;sp|P05062|ALDOB_HUMAN Fructose-bisphosphate aldolase B OS=Homo sapiens OX=9606 GN=ALDOB PE=1 SV=2;tr|A0A087WXX2|A0A087WXX2_HUMAN Iso	0	23471000	276230	10027000	15708000	0	0	65559000	0	72255000	34640000	0	81572000	48482000	47159000	741190000	10215000	0	157850000	0	49253000	3203300000	1975100	3133800	9823200	929510	0	45764000	0	1129800000	93695000	0	272130000	33848000	706680	8614800	32158000	95643000	49386000	188640	32574000	58705000	13645000	158750000	1705000
P09972;A8MVZ9;J3KSV6;J3QKP5;C9J8F3	7	Fructose-bisphosphate aldolase C;Fructose-bisphosphate aldolase	ALDOC	sp|P09972|ALDOC_HUMAN Fructose-bisphosphate aldolase C OS=Homo sapiens OX=9606 GN=ALDOC PE=1 SV=2;tr|A8MVZ9|A8MVZ9_HUMAN Isoform of P09972, Fructose-bisphosphate aldolase OS=Homo sapiens OX=9606 GN=ALDOC PE=1 SV=1;tr|J3KSV6|J3KSV6_HUMAN Isoform of P09972,	3535800000	25259000000	29634000000	14246000000	7988600000	3194100000	451840000	948540000	106600000	3949900000	26583000000	3169400000	56209000000	22395000000	501860000	29040000000	648410000	16390000000	498070000000	13868000000	489100000	2417800000	8814200000	30580000000	799240000	1343100000	42847000000	3449600000	488430000	2636600000	5045200000	242130000	6023000000	11739000000	1183000000	33113000000	6999100000	9123800000	32491000000	335080000	12595000000	275160000000	17884000000	23367000000	15186000000
Q9NXW9	1	Alpha-ketoglutarate-dependent dioxygenase alkB homolog 4	ALKBH4	sp|Q9NXW9|ALKB4_HUMAN Alpha-ketoglutarate-dependent dioxygenase alkB homolog 4 OS=Homo sapiens OX=9606 GN=ALKBH4 PE=1 SV=1	92850000	146640000	18750000	20292000	14107000	17844000	44070000	64239000	0	51273000	19515000	68353000	219620000	218500000	188940000	135450000	128930000	30519000	325650000	15962000	14710000	453740	11468000	49371000	620920	339580000	41656000	980160000	27584000	169740000	70252000	24365000	18098000000	274020000	0	57528000	226560000	39225000	597940000	2444500	161000000	30014000000	41627000	50153000	1284100
A0A087WTU9;Q8TCU4;Q8TCU4-2;A0A087WV20;Q8TCU4-3	11	Alstrom syndrome protein 1	ALMS1	tr|A0A087WTU9|A0A087WTU9_HUMAN Isoform of Q8TCU4, Alstrom syndrome protein 1 OS=Homo sapiens OX=9606 GN=ALMS1 PE=1 SV=1;sp|Q8TCU4|ALMS1_HUMAN Alstrom syndrome protein 1 OS=Homo sapiens OX=9606 GN=ALMS1 PE=1 SV=4;sp|Q8TCU4-2|ALMS1-2_HUMAN Isoform of Q8TCU4,	759450000	619690000	242160000	557330000	852920000	61260000	368560000	468970000	187130000	943520000	473890000	1425200000	1351000000	377660000	1166100000	215810000	409300000	188710000	759990000	4225800	14765000	455890000	170380000	657550000	1819700000	228720000	74004000	2566200000	833210000	11023000000	2490300000	212430000	15953000000	174470000	268910000	1119800000	680020000	370180000	4067600000	183390000	245140000	758060000	828490000	159080000	27825000
O75342;A0A3B3IRK2	2	Arachidonate 12-lipoxygenase, 12R-type	ALOX12B	sp|O75342|LX12B_HUMAN Arachidonate 12-lipoxygenase, 12R-type OS=Homo sapiens OX=9606 GN=ALOX12B PE=1 SV=1;tr|A0A3B3IRK2|A0A3B3IRK2_HUMAN Isoform of O75342, Arachidonate 12-lipoxygenase, 12R-type (Fragment) OS=Homo sapiens OX=9606 GN=ALOX12B PE=1 SV=1	12057000	140220000	3084200	42095000	1369900000	122860000	3088100	205370000	65718000	101680000	374030000	272550000	5172900000	500950000	210700000	256160000	74005000	3688800	140310000	98122000	29194000	24911000	88282000	411230000	236570000	189620000	32050000	339410000	12524000	745800000	1158600000	26699000	74875000	921730000	973090000	108120000	934030000	3994200000	630440000	42757000	61233000	121900000	4253700000	587590000	4756100
I3L1D5;O15296;O15296-2;O15296-4	4	Arachidonate 15-lipoxygenase B	ALOX15B	tr|I3L1D5|I3L1D5_HUMAN Isoform of O15296, Arachidonate 15-lipoxygenase B OS=Homo sapiens OX=9606 GN=ALOX15B PE=1 SV=1;sp|O15296|LX15B_HUMAN Arachidonate 15-lipoxygenase B OS=Homo sapiens OX=9606 GN=ALOX15B PE=1 SV=3;sp|O15296-2|LX15B-2_HUMAN Isoform of O15	54857000	94314000	0	842220	11264000	17651000	1749300	51835000	727400	110730000	45749000	254740000	40003000	244190000	25554000	24007000	18556000	12997000	232390000	974720	0	45289000	3147500	728520	36072000	18087000	6018900	99714000	3767400	87610000	458860000	18805000	729960000	74430000	66655000	34484000	30609000	450500000	150520000	38711000	62666000	35867000	4382700	66401000	15983000
P09917;P09917-2;P09917-3;P09917-5;P09917-4	6	Arachidonate 5-lipoxygenase	ALOX5	sp|P09917|LOX5_HUMAN Arachidonate 5-lipoxygenase OS=Homo sapiens OX=9606 GN=ALOX5 PE=1 SV=2;sp|P09917-2|LOX5-2_HUMAN Isoform of P09917, Isoform 2 of Arachidonate 5-lipoxygenase OS=Homo sapiens OX=9606 GN=ALOX5 PE=1 SV=2;sp|P09917-3|LOX5-3_HUMAN Isoform of	63911000	37354000	3959600	324430000	9299300	6614500	23892000	125980000	0	24932000	14660000	12367000	64390000	172290000	213480000	146120000	16849000	3268500	176050000	5569900	12282000	27244000	2209800	931990	68601000	9174100	39888000	37826000	738100	191490000	547570000	0	75862000	30948000	44703000	7994100	92570000	93205000	54617000	277120000	84124000	511350000	28061000000	0	16867000
A0A087WW23;P20292	2	Arachidonate 5-lipoxygenase-activating protein	ALOX5AP	tr|A0A087WW23|A0A087WW23_HUMAN Isoform of P20292, Arachidonate 5-lipoxygenase-activating protein OS=Homo sapiens OX=9606 GN=ALOX5AP PE=1 SV=1;sp|P20292|AL5AP_HUMAN Arachidonate 5-lipoxygenase-activating protein OS=Homo sapiens OX=9606 GN=ALOX5AP PE=1 SV=2	17955000	13967000	4098800	2020600	418400	1049000	4215800	9225700	746180	7402500	0	22850000	32244000	105820000	13175000	11220000	1603300	0	31879000	1186500	0	7761700	17291000	513250	526310	7605300	0	37013000	0	6924100	20250000	0	35799000	175680000	1410100	44140000	0	43586000	25326000	4484700	31940000	21461000	2640100	9795400	1480100
J3KPH2;Q9BYJ1;Q9BYJ1-2	3	Hydroperoxide isomerase ALOXE3	ALOXE3	tr|J3KPH2|J3KPH2_HUMAN Isoform of Q9BYJ1, Arachidonate lipoxygenase 3, isoform CRA_a OS=Homo sapiens OX=9606 GN=ALOXE3 PE=1 SV=1;sp|Q9BYJ1|LOXE3_HUMAN Hydroperoxide isomerase ALOXE3 OS=Homo sapiens OX=9606 GN=ALOXE3 PE=1 SV=1;sp|Q9BYJ1-2|LOXE3-2_HUMAN Isof	44157000	107680000	9602300	22120000	22449000	4683500	29971000	111670000	37856000	70607000	83400000	96205000	200020000	515960000	201470000	252040000	81174000	12680000	3262700000	4976700	3097200	69974000	35466000	145260000	73844000	27615000	97731000	151220000	48519000	393520000	8738000000	18339000	744270000	88636000	66064000	219490000	176600000	890740000	549510000	728510	87003000	462200000	36036000	1031900000	4481500
P05186-3;P05186-2;P05186	4	Alkaline phosphatase, tissue-nonspecific isozyme	ALPL	sp|P05186-3|PPBT-3_HUMAN Isoform of P05186, Isoform 3 of Alkaline phosphatase, tissue-nonspecific isozyme OS=Homo sapiens OX=9606 GN=ALPL PE=1 SV=4;sp|P05186-2|PPBT-2_HUMAN Isoform of P05186, Isoform 2 of Alkaline phosphatase, tissue-nonspecific isozyme OS	78025000	47413000	6520600	26559000	40297000	3395000	13952000	110010000	21306000	2277600000	9063500	37184000	43671000	223250000	122280000	143470000	6086400	4969400	587210000	10863000	32100000	16268000	160830000	26146000	12823000	137930000	5852700	252820000	4677200	258000000	361750000	405010	541640000	865630000	13471000	144840000	166680000	4431100000	86845000	21397000	52546000	291150000	115490000	32490000	17750000
Q96Q42	6	Alsin	ALS2	sp|Q96Q42|ALS2_HUMAN Alsin OS=Homo sapiens OX=9606 GN=ALS2 PE=1 SV=2	57064000	63982000	4577500	561500000	257150000	8351000	11035000	765580000	31525000	1038600000	227910000	204610000	183020000	315890000	44987000	555200000	51851000	18810000	2154100000	22788000	22723000	192730000	17589000	60896000	75605000	314530000	71859000	119760000	981840	80648000	9197200000	5217100	564290000	393110000	24337000	238160000	176650000	299600000	537840000	28757000	434260000	911810000	121760000	12785000	26254000
P02760	3	Protein AMBP;Alpha-1-microglobulin;Inter-alpha-trypsin inhibitor light chain;Trypstatin	AMBP	sp|P02760|AMBP_HUMAN Protein AMBP OS=Homo sapiens OX=9606 GN=AMBP PE=1 SV=1	16523000	23210000	23673000	596470000	116750000	9490100	5287800	41194000	67477000	67847000	204960000	117160000	98477000	1492600000	59426000	105200000	18886000	17134000	337970000	93264000	17738000	92380000	20410000	61335000	35537000	15679000	19991000	39883000	55732000	304540000	76583000	12485000	1025600000	287050000	4181500	80072000	45253000	584080000	211740000	122490000	49517000	66727000	22485000	29170000	35011000
Q9C0C7-5	1	Activating molecule in BECN1-regulated autophagy protein 1	AMBRA1	sp|Q9C0C7-5|AMRA1-5_HUMAN Isoform of Q9C0C7, Isoform 5 of Activating molecule in BECN1-regulated autophagy protein 1 OS=Homo sapiens OX=9606 GN=AMBRA1 PE=1 SV=2	2951500000	85996000	9665700	208010000	123960000	41897000	60239000	110580000	6239500	287160000	16637000	42959000	632270000	168610000	1597800000	18082000	98271000	42010000	2521000000	68544000	17758000	68190000	8799000	10228000	6491700	97971000	107000000	238260000	0	351800000	1914400000	0	237850000	1084400000	44538000	31992000	33640000	1131000000	179710000	20939000	128930000	1755900000	327990000	823890000	1500800000
P17707;Q5VXN5;P17707-2	4	S-adenosylmethionine decarboxylase proenzyme;S-adenosylmethionine decarboxylase alpha chain;S-adenosylmethionine decarboxylase beta chain	AMD1	sp|P17707|DCAM_HUMAN S-adenosylmethionine decarboxylase proenzyme OS=Homo sapiens OX=9606 GN=AMD1 PE=1 SV=2;tr|Q5VXN5|Q5VXN5_HUMAN Isoform of P17707, S-adenosylmethionine decarboxylase proenzyme OS=Homo sapiens OX=9606 GN=AMD1 PE=1 SV=1;sp|P17707-2|DCAM-2_	22143000	73294000	13342000	11967000	2408800	7275300	4744900	233450000	0	196260000	33837000	108470000	103690000	695120000	47155000	24274000	12599000	0	122460000	2707900	0	20528000	26312000	66602000	997040	76494000	71919000	13684000	38708000	7588700	62935000	4454300	10028000	18248000	3085700	18420000	12146000	90818000	12219000	9943400	24625000	11316000	1974900	5829500	7016100
Q9Y303;Q9Y303-2;Q9Y303-3;A0A3B3IU33;H3BTZ6;H3BSV9	10	Putative N-acetylglucosamine-6-phosphate deacetylase	AMDHD2	sp|Q9Y303|NAGA_HUMAN N-acetylglucosamine-6-phosphate deacetylase OS=Homo sapiens OX=9606 GN=AMDHD2 PE=1 SV=2;sp|Q9Y303-2|NAGA-2_HUMAN Isoform of Q9Y303, Isoform 2 of N-acetylglucosamine-6-phosphate deacetylase OS=Homo sapiens OX=9606 GN=AMDHD2 PE=1 SV=2;sp	191080000	399090000	18283000	307780000	84650000	130570000	64102000	143540000	4485700	310960000	176250000	267750000	192650000	1843300000	312350000	369030000	82514000	52669000	508720000	132860000	16221000	194830000	93670000	135110000	39813000	225960000	192560000	355670000	19845000	1822900000	234550000	40229000	452190000	266220000	726400000	100650000	261570000	406050000	432720000	25370000	302130000	342400000	54769000	57064000	61634000
Q8N7J2;Q8N7J2-2	2	APC membrane recruitment protein 2	AMER2	sp|Q8N7J2|AMER2_HUMAN APC membrane recruitment protein 2 OS=Homo sapiens OX=9606 GN=AMER2 PE=1 SV=3;sp|Q8N7J2-2|AMER2-2_HUMAN Isoform of Q8N7J2, Isoform 2 of APC membrane recruitment protein 2 OS=Homo sapiens OX=9606 GN=AMER2 PE=1 SV=3	26283000	89461000	15694000	433370000	22888000	23496000	54760000	68643000	38538000	97014000	209920000	710610000	267330000	1192300000	6450700000	80587000	132590000	92427000	309180000	117820000	14039000	81288000	54350000	324820000	286540000	224240000	210550000	175030000	0	776990000	701260000	8007500	264680000	518860000	151750000	155560000	327120000	15095000	163280000	457960000	464140000	1225200000	69864000	93811000	27658000
E7ERM3;Q4VCS5;A6NP16;Q4VCS5-2	4	Angiomotin	AMOT	tr|E7ERM3|E7ERM3_HUMAN Isoform of Q4VCS5, Angiomotin OS=Homo sapiens OX=9606 GN=AMOT PE=1 SV=1;sp|Q4VCS5|AMOT_HUMAN Angiomotin OS=Homo sapiens OX=9606 GN=AMOT PE=1 SV=1;tr|A6NP16|A6NP16_HUMAN Isoform of Q4VCS5, Angiomotin OS=Homo sapiens OX=9606 GN=AMOT PE	46470000	7800100	1468500000	16778000	381570000	0	30061000	111630000	2943300	815500000	3203200000	3681400000	7023100000	18669000	1160200000	36653000	5028900	1726200	411420000	36545000	672160	79441000	775960000	4371200	17131000	811390000	68415000	38280000	13819000	87602000	115930000	6708400000	221810000	54153000	17919000	33624000	33768000	1262200000	139110000	2232200000	190620000	15376000	53187000	2805700000	7911300
Q9Y2J4-4	1	Angiomotin-like protein 2	AMOTL2	sp|Q9Y2J4-4|AMOL2-4_HUMAN Isoform of Q9Y2J4, Isoform 4 of Angiomotin-like protein 2 OS=Homo sapiens OX=9606 GN=AMOTL2 PE=1 SV=3	249910000	1560000000	10868000	13038000	16505000	121770000	0	11061000	5563200	32511000	74840000	24654000	70991000	194430000	25670000	1569100000	75263000	0	568120000	34295000	1305200000	65507000	1078100000	1589700000	27194000	18370000	145890000	153180000	3866100	4513200000	49874000	2985700	312410000	5825200	1413200000	214420000	14140000	741410000	14361000	2477600	0	748500000	75914000	0	58052000
Q01433;H0Y360;Q01433-2;Q01433-5	8	AMP deaminase 2	AMPD2	sp|Q01433|AMPD2_HUMAN AMP deaminase 2 OS=Homo sapiens OX=9606 GN=AMPD2 PE=1 SV=2;tr|H0Y360|H0Y360_HUMAN Isoform of Q01433, AMP deaminase 2 (Fragment) OS=Homo sapiens OX=9606 GN=AMPD2 PE=1 SV=1;sp|Q01433-2|AMPD2-2_HUMAN Isoform of Q01433, Isoform Ex1A-2-3 o	14788000000	13550000000	3963000000	4456900000	3063500000	3398500000	4025200000	8303400000	8405300000	9254500000	4230000000	12947000000	11698000000	23194000000	11085000000	5518000000	3327400000	1537100000	20332000000	1454400000	2719800000	11663000000	4925300000	8674500000	2602300000	5737100000	9299000000	2123400000	1271700000	12213000000	15885000000	1042100000	11347000000	4226900000	1682000000	2708100000	5455700000	3921200000	5351100000	1217200000	7645500000	27479000000	2537100000	1102700000	3546500000
Q01432;Q01432-5;Q01432-4;Q01432-6;E9PKC5;Q01432-3	12	AMP deaminase 3	AMPD3	sp|Q01432|AMPD3_HUMAN AMP deaminase 3 OS=Homo sapiens OX=9606 GN=AMPD3 PE=1 SV=1;sp|Q01432-5|AMPD3-5_HUMAN Isoform of Q01432, Isoform 3 of AMP deaminase 3 OS=Homo sapiens OX=9606 GN=AMPD3 PE=1 SV=1;sp|Q01432-4|AMPD3-4_HUMAN Isoform of Q01432, Isoform 2 of	737700000	595810000	41079000	741950000	172140000	808120000	342780000	276210000	721500000	359140000	257670000	421800000	585120000	1655200000	1061800000	466450000	135870000	50368000	561070000	63911000	131410000	480170000	281810000	226480000	145270000	284010000	253830000	149700000	45434000	1139500000	6610600000	64528000	297990000	93657000	121870000	213960000	221930000	591800000	136500000	268540000	791350000	1453800000	39703000	68815000	130640000
P49418;P49418-2	2	Amphiphysin	AMPH	sp|P49418|AMPH_HUMAN Amphiphysin OS=Homo sapiens OX=9606 GN=AMPH PE=1 SV=1;sp|P49418-2|AMPH-2_HUMAN Isoform of P49418, Isoform 2 of Amphiphysin OS=Homo sapiens OX=9606 GN=AMPH PE=1 SV=1	6889800000	16702000000	8190900000	5370400000	8383500000	16344000000	5549400000	35304000000	11156000000	52053000000	14747000000	33493000000	47399000000	60390000000	11399000000	20702000000	8283000000	8251000000	36632000000	3280400000	2704100000	18006000000	10915000000	15323000000	8262300000	23267000000	13849000000	3745000000	3464300000	28424000000	75840000000	5029100000	30306000000	29564000000	6529000000	9148300000	37529000000	47199000000	35246000000	1241600000	28052000000	48507000000	32198000000	8703800000	13749000000
P04745;P19961;P04746;P19961-2	10	Alpha-amylase 1;Alpha-amylase 2B;Pancreatic alpha-amylase	AMY1A;AMY2B;AMY2A	sp|P04745|AMY1_HUMAN Alpha-amylase 1 OS=Homo sapiens OX=9606 GN=AMY1C PE=1 SV=2;sp|P19961|AMY2B_HUMAN Alpha-amylase 2B OS=Homo sapiens OX=9606 GN=AMY2B PE=1 SV=1;sp|P04746|AMYP_HUMAN Pancreatic alpha-amylase OS=Homo sapiens OX=9606 GN=AMY2A PE=1 SV=2;sp|P1	47903000	92828000	1859600	124430000	13575000	34646000	153400000	17391000	2729000	5223600	110410000	1539600	304480000	750040000	165170000	52249000	8770600	79365000	141090000	6690700	6082700	12236000	40439000	101780000	637140000	0	16677000	116140000	29612000	64303000	1449600000	1219600	314100000	102150000	201630000	146990000	1557800000	370120000	552590000	55288000	77600000	165140000	89674000	707480000	25231000
Q9H1A4;H0Y564	3	Anaphase-promoting complex subunit 1	ANAPC1	sp|Q9H1A4|APC1_HUMAN Anaphase-promoting complex subunit 1 OS=Homo sapiens OX=9606 GN=ANAPC1 PE=1 SV=1;tr|H0Y564|H0Y564_HUMAN Isoform of Q9H1A4, Anaphase-promoting complex subunit 1 (Fragment) OS=Homo sapiens OX=9606 GN=ANAPC1 PE=1 SV=1	210490000	104260000	9736400	186120	4155100	43695000	11246000	10045000	0	91087000	72623000	89826000	30263000	645170000	89708000	147790000	8679300	0	276950000	39920000	6893600	37757000	54313000	0	32970000	50269000	4158700	1187900000	8680900	41835000	1645100000	2835700	201470000	154150000	64201000	7988600	22990000	174570000	194030000	630830000	237870000	262550000	117260000	37282000	229140000
Q9UJX6-2;Q9UJX6	2	Anaphase-promoting complex subunit 2	ANAPC2	sp|Q9UJX6-2|ANC2-2_HUMAN Isoform of Q9UJX6, Isoform 2 of Anaphase-promoting complex subunit 2 OS=Homo sapiens OX=9606 GN=ANAPC2 PE=1 SV=1;sp|Q9UJX6|ANC2_HUMAN Anaphase-promoting complex subunit 2 OS=Homo sapiens OX=9606 GN=ANAPC2 PE=1 SV=1	137860000	4408600	1582300	18333000	0	4208600	9997100	23679000	7947900	6626600	12000000	1676200	40759000	419080000	136070000	77374000	4481700	0	329520000	2457800	9621300	20938000	0	3913100	13656000	12942000	644790	145080000	0	63474000	435750000	2875200	124820000	996500000	0	69909000	155360000	80485000	140870000	0	10627000	216140000	19603000	51784000	6778900
Q9UJX5;Q9UJX5-3;Q9UJX5-2	4	Anaphase-promoting complex subunit 4	ANAPC4	sp|Q9UJX5|APC4_HUMAN Anaphase-promoting complex subunit 4 OS=Homo sapiens OX=9606 GN=ANAPC4 PE=1 SV=2;sp|Q9UJX5-3|APC4-3_HUMAN Isoform of Q9UJX5, Isoform 3 of Anaphase-promoting complex subunit 4 OS=Homo sapiens OX=9606 GN=ANAPC4 PE=1 SV=2;sp|Q9UJX5-2|APC4	140830000	16197000	1913100	24090000	12581000	671190	865810000	87875000	0	44583000	108900000	66757000	109760000	196880000	130670000	783640000	139810000	24251000	249860000	5390100	4865600	1434400000	36916000	314850000	15452000	497570000	0	34580000	0	15192000	35330000000	9282300	1199700000	45107000	533920000	44525000	668250000	544000000	208310000	0	821330000	101820000	533540000	28291000	493600000
F5H0F9;Q9UJX4;Q9UJX4-3	9	Anaphase-promoting complex subunit 5	ANAPC5	tr|F5H0F9|F5H0F9_HUMAN Isoform of Q9UJX4, Anaphase-promoting complex subunit 5 OS=Homo sapiens OX=9606 GN=ANAPC5 PE=1 SV=1;sp|Q9UJX4|APC5_HUMAN Anaphase-promoting complex subunit 5 OS=Homo sapiens OX=9606 GN=ANAPC5 PE=1 SV=2;sp|Q9UJX4-3|APC5-3_HUMAN Isofor	128550000	35299000	2255700	28330000	6855400	5741300	15973000	28768000	2226200	8923000	13470000	30807000	108290000	28561000	38652000	507870000	951970	43353000	77785000	896020000	4882700	8842900	1453500000	13373000	7266600	216160000	1724900	23035000	2176400	151040000	260510000	0	136730000	24847000	27417000	16858000	99066000	243410000	14624000	2870800	23671000	279260000	6382600	85047000	43854000
P16157-14;P16157-10;P16157-12;P16157;P16157-3;P16157-16;P16157-5;P16157-8;P16157-4;P16157-13;P16157-7;P16157-6;P16157-9;P16157-11;P16157-15;P16157-2;H0YBS0	19	Ankyrin-1	ANK1	sp|P16157-14|ANK1-14_HUMAN Isoform of P16157, Isoform Er13 of Ankyrin-1 OS=Homo sapiens OX=9606 GN=ANK1 PE=1 SV=3;sp|P16157-10|ANK1-10_HUMAN Isoform of P16157, Isoform Er9 of Ankyrin-1 OS=Homo sapiens OX=9606 GN=ANK1 PE=1 SV=3;sp|P16157-12|ANK1-12_HUMAN Is	142310000	108210000	174770000	376520000	231620000	40287000	209950000	209020000	24488000	109520000	142770000	651180000	130670000	247870000	125570000	152600000	47613000	68217000	4022400000	36118000	44230000	740550000	26780000	421050000	614400000	81277000	293260000	371380000	22558000	639200000	425590000	23281000	1912400000	245050000	157150000	268150000	403000000	3809000000	318130000	124730000	432700000	844320000	160170000	919340000	94686000
Q01484	4	Ankyrin-2	ANK2	sp|Q01484|ANK2_HUMAN Ankyrin-2 OS=Homo sapiens OX=9606 GN=ANK2 PE=1 SV=4	1626600000	1786900000	382510000	4205000000	1115600000	1942900000	334060000	2982500000	631480000	3133700000	2677900000	2813900000	16782000000	9442900000	4687400000	6264900000	5739400000	2813900000	5449500000	137800000	2170900000	3303700000	21225000000	1124500000	1774300000	5664900000	5089100000	1923900000	421360000	9015100000	30032000000	525120000	19929000000	11834000000	991040000	18435000000	7253500000	11994000000	14342000000	1624400000	13563000000	14302000000	6853000000	951960000	514730000
Q12955;Q12955-5;Q12955-4;Q12955-7	8	Ankyrin-3	ANK3	sp|Q12955|ANK3_HUMAN Ankyrin-3 OS=Homo sapiens OX=9606 GN=ANK3 PE=1 SV=3;sp|Q12955-5|ANK3-5_HUMAN Isoform of Q12955, Isoform 3 of Ankyrin-3 OS=Homo sapiens OX=9606 GN=ANK3 PE=1 SV=3;sp|Q12955-4|ANK3-4_HUMAN Isoform of Q12955, Isoform 2 of Ankyrin-3 OS=Homo	197880000	161900000	14290000	123360000	54250000	69135000	59010000	223900000	35153000	237540000	92353000	2284500000	464730000	1539800000	681760000	1624800000	121790000	34280000	498690000	95055000	59218000	118330000	53022000	223120000	109700000	146350000	72861000	351010000	25298000	680160000	5958400000	21949000	971720000	369690000	161470000	408570000	597810000	393530000	978270000	226430000	1088400000	764910000	1105100000	119610000	66142000
Q9P2R3-4;Q9P2R3;Q9P2R3-2	6	Rabankyrin-5	ANKFY1	sp|Q9P2R3-4|ANFY1-4_HUMAN Isoform of Q9P2R3, Isoform 4 of Rabankyrin-5 OS=Homo sapiens OX=9606 GN=ANKFY1 PE=1 SV=2;sp|Q9P2R3|ANFY1_HUMAN Rabankyrin-5 OS=Homo sapiens OX=9606 GN=ANKFY1 PE=1 SV=2;sp|Q9P2R3-2|ANFY1-2_HUMAN Isoform of Q9P2R3, Isoform 2 of Raba	178260000	78718000	20488000	2705000000	143740000	65356000	3816400	249940000	80192000	627650000	379920000	69263000	949740000	355340000	358200000	184360000	1303200000	188210000	3669000000	18786000	463300000	144350000	43115000	23204000	735970000	1428100000	457610000	394590000	35890000	178410000	1879700000	51539000	821350000	509890000	547000000	3084400000	2947500000	9593300000	706240000	279380000	236590000	737190000	1041500000	321540000	172160000
Q86XL3;Q86XL3-2	4	Ankyrin repeat and LEM domain-containing protein 2	ANKLE2	sp|Q86XL3|ANKL2_HUMAN Ankyrin repeat and LEM domain-containing protein 2 OS=Homo sapiens OX=9606 GN=ANKLE2 PE=1 SV=4;sp|Q86XL3-2|ANKL2-2_HUMAN Isoform of Q86XL3, Isoform 2 of Ankyrin repeat and LEM domain-containing protein 2 OS=Homo sapiens OX=9606 GN=ANK	691110000	82186000	17263000	139690000	27534000	148460000	26123000	299690000	96969000	52753000	122400000	1599900	84074000	3800700000	16171000	113920000	242690000	61470000	1021900000	12009000	2749200	106340000	59400000	100050000	329730000	15608000	8934300	871770000	131170000	1354400000	2219800000	1919300	144250000	31180000	276580000	807470000	445960000	401930000	249570000	1163300000	93661000	1048900000	44666000	123040000	19993000
Q8IV38;G3V0G5	3	Ankyrin repeat and MYND domain-containing protein 2	ANKMY2	sp|Q8IV38|ANKY2_HUMAN Ankyrin repeat and MYND domain-containing protein 2 OS=Homo sapiens OX=9606 GN=ANKMY2 PE=1 SV=1;tr|G3V0G5|G3V0G5_HUMAN Isoform of Q8IV38, Ankyrin repeat and MYND domain containing 2, isoform CRA_c OS=Homo sapiens OX=9606 GN=ANKMY2 PE=	0	21003000	0	13027000	296690	0	0	0	0	25760000	0	77284000	9204900	2622600	19708000	27614000	11504000	0	147350000	0	10946000	0	0	2063200	2860600	6781000	27683000	0	0	507580	47475000	0	4893000	29061000	0	480510000	218520000	56176000	29213000	3104200	12967000	0	101830000	0	0
Q6UB98-2;Q6UB98	4	Ankyrin repeat domain-containing protein 12	ANKRD12	sp|Q6UB98-2|ANR12-2_HUMAN Isoform of Q6UB98, Isoform 2 of Ankyrin repeat domain-containing protein 12 OS=Homo sapiens OX=9606 GN=ANKRD12 PE=1 SV=3;sp|Q6UB98|ANR12_HUMAN Ankyrin repeat domain-containing protein 12 OS=Homo sapiens OX=9606 GN=ANKRD12 PE=1 SV=	94099000	22410000	2737000	1685200	23552000	15522000	15710000	1006000	2485600	148860000	21728000	65164000	82892000	70446000	124540000	5927600	1510200	12507000	109370000	67006000	0	9651800	7519500	2911900	1361200	46055000	19015000	10668000	1904600	32155000	41383000	5814800	22369000	70091000	7261500	237950000	16406000	127670000	83843000	0	15370000	159290000	8374000	35380000	88513000
Q8IZ07;H0YIN8	5	Ankyrin repeat domain-containing protein 13A	ANKRD13A	sp|Q8IZ07|AN13A_HUMAN Ankyrin repeat domain-containing protein 13A OS=Homo sapiens OX=9606 GN=ANKRD13A PE=1 SV=3;tr|H0YIN8|H0YIN8_HUMAN Isoform of Q8IZ07, Ankyrin repeat domain-containing protein 13A (Fragment) OS=Homo sapiens OX=9606 GN=ANKRD13A PE=1 SV=8	9956400	20928000	5114800	71566000	22112000	69047000	6145000	3865600	4759600	1207200	5938700	0	73134000	55819000	25353000	11398000	5323700	32199000	63045000	0	8575200	62123000	0	0	6404000	11834000	0	27941000	2353800	162800000	133740000	0	59900000	5999300	1195000	18585000	674450	181480000	39441000	7116900	12621000	142490000	14123000	53214000	3463900
Q6ZTN6-3	1	Ankyrin repeat domain-containing protein 13D	ANKRD13D	sp|Q6ZTN6-3|AN13D-3_HUMAN Isoform of Q6ZTN6, Isoform 3 of Ankyrin repeat domain-containing protein 13D OS=Homo sapiens OX=9606 GN=ANKRD13D PE=1 SV=2	0	2151100	376960	221570000	433350	789530	0	4619400	2117400	0	8363100	51225000	42847000	52133000	6338700	52837000	68291000	10830000	397060000	25369	23936000	7662300	1595200	10073000	1751200	43171000	0	23585000	4843500	51485000	38250000	2358200	40492000	25869000	1279900	148860000	254910000	263850000	29457000	0	21974000	23578000	62923000	1034700	11435000
H0YM23;O75179-6;O75179-7;O75179-2;O75179;O75179-4	12	Ankyrin repeat domain-containing protein 17	ANKRD17	tr|H0YM23|H0YM23_HUMAN Isoform of O75179, Ankyrin repeat domain-containing protein 17 (Fragment) OS=Homo sapiens OX=9606 GN=ANKRD17 PE=1 SV=1;sp|O75179-6|ANR17-6_HUMAN Isoform of O75179, Isoform 6 of Ankyrin repeat domain-containing protein 17 OS=Homo sapi	1627700	40200000	5770600	54467000	82766000	4626700	24839000	60066000	72990000	98324000	15439000	178740000	798910000	316920000	121570000	240370000	38591000	18238000	116950000	0	5048500	42645000	402070	37132000	101220000	13250000	90474000	492740000	5037700	74987000	196260000	10889000	75657000	84315000	55047000	132630000	61945000	540410000	15029000	6979600	27890000	157410000	79484000	60989000	32842000
Q5CZ79-2;Q5CZ79;Q5VUR7;Q5TYW2;Q5SQ80;Q4UJ75	6	Ankyrin repeat domain-containing protein 20B;Ankyrin repeat domain-containing protein 20A3;Ankyrin repeat domain-containing protein 20A1;Ankyrin repeat domain-containing protein 20A2;Ankyrin repeat domain-containing protein 20A4	ANKRD20A8P;ANKRD20A3;ANKRD20A1;ANKRD20A2;ANKRD20A4	sp|Q5CZ79-2|AN20B-2_HUMAN Isoform of Q5CZ79, Isoform 2 of Ankyrin repeat domain-containing protein 20B OS=Homo sapiens OX=9606 GN=ANKRD20A8P PE=4 SV=2;sp|Q5CZ79|AN20B_HUMAN Ankyrin repeat domain-containing protein 20B OS=Homo sapiens OX=9606 GN=ANKRD20A8P	214260000	56651000	15339000	28330000	6748200	45326000	3760400	63300000	2778600	48347000	84182000	290540000	291160000	66846000	120770000	68987000	74280000	240540000	247010000	108090000	707010	132080000	1847300	83431000	97958000	68127000	1337800000	732890000	138840000	329110000	325390000	70352000	571260000	3087400000	681420000	67568000	120270000	1028500000	610890000	65422000	22167000	223980000	40933000	106450000	218560000
Q5VYY1	1	Ankyrin repeat domain-containing protein 22	ANKRD22	sp|Q5VYY1|ANR22_HUMAN Ankyrin repeat domain-containing protein 22 OS=Homo sapiens OX=9606 GN=ANKRD22 PE=2 SV=1	10480000	5692900	0	216210	231850	0	0	53191000	0	12286000	206460	0	1895500	205610000	23574000	730340	0	0	74766000	0	0	0	0	1404800	126370000	13205000	0	9362600	2396200	4609300	150200000	178520	21666000	0	74237000	2094300	0	132480000	13782000	0	8244400	4075400	0	31404000	0
O15084;O15084-4;O15084-1;O15084-2;B4DIW9	5	Serine/threonine-protein phosphatase 6 regulatory ankyrin repeat subunit A	ANKRD28	sp|O15084|ANR28_HUMAN Serine/threonine-protein phosphatase 6 regulatory ankyrin repeat subunit A OS=Homo sapiens OX=9606 GN=ANKRD28 PE=1 SV=5;sp|O15084-4|ANR28-4_HUMAN Isoform of O15084, Isoform 4 of Serine/threonine-protein phosphatase 6 regulatory ankyri	21333000	6653100	0	4370000	0	0	980220	4816000	0	92678000	2283700	10724000	0	0	0	51102000	34577000	218320	39211000	0	478300	7887000	0	0	2583900	3496200	10989000	454750	0	0	88327000	0	10974000	90944000	423960	15660000	54698000	115980000	63714000	3765700	22387000	3090800	5600700	0	7150600
Q8N6D5;Q8N6D5-3	5	Ankyrin repeat domain-containing protein 29	ANKRD29	sp|Q8N6D5|ANR29_HUMAN Ankyrin repeat domain-containing protein 29 OS=Homo sapiens OX=9606 GN=ANKRD29 PE=2 SV=2;sp|Q8N6D5-3|ANR29-3_HUMAN Isoform of Q8N6D5, Isoform 3 of Ankyrin repeat domain-containing protein 29 OS=Homo sapiens OX=9606 GN=ANKRD29 PE=2 SV=	127740000	506540000	40340000	170480000	82827000	182760000	111780000	512690000	72802000	393460000	241440000	353090000	587570000	647030000	174790000	555970000	41599000	31630000	1143900000	67211000	98488000	681500000	150650000	142750000	138470000	455260000	188270000	123790000	69439000	519210000	1526700000	16412000	740620000	263080000	104870000	106550000	405270000	174530000	559980000	24643000	567580000	745350000	125320000	148010000	156270000
D6RJB7;Q8N7Z5	2	Putative ankyrin repeat domain-containing protein 31	ANKRD31	tr|D6RJB7|D6RJB7_HUMAN Isoform of Q8N7Z5, Putative ankyrin repeat domain-containing protein 31 OS=Homo sapiens OX=9606 GN=ANKRD31 PE=4 SV=2;sp|Q8N7Z5|ANR31_HUMAN Putative ankyrin repeat domain-containing protein 31 OS=Homo sapiens OX=9606 GN=ANKRD31 PE=5 S	164760000	34050000	25543000	471730000	65266000	19369000000	1088200	194110000	0	0	0	26832000000	382650000	58253000	99460000000	366640000	59505000	0	132720000000	38915000	91798000	0	8140600	35075000	29934000	4003500	75195000	1356200	69093000	455070000	5067500000	376540	2074500000	483400000	19093000	479350000	131830000	105060000	20613000	0	0	24371000	11644000	20588000	21612000
Q8N283;F6XZD3	3	Ankyrin repeat domain-containing protein 35	ANKRD35	sp|Q8N283|ANR35_HUMAN Ankyrin repeat domain-containing protein 35 OS=Homo sapiens OX=9606 GN=ANKRD35 PE=2 SV=2;tr|F6XZD3|F6XZD3_HUMAN Isoform of Q8N283, Ankyrin repeat domain-containing protein 35 OS=Homo sapiens OX=9606 GN=ANKRD35 PE=1 SV=1	152580000	72395000	11535000	35384000	3523300	36120000	218340000	122690000	0	52130000	45662000	20803000	3017300000	1769200000	1245400000	24156000	4017200	10666000	213920000	112930000	53305000	37038000	54786000	36016000	18395000	416420000	1720200	2638200	0	18726000	2556600000	927920	314070000	105810000	1246500000	112110000	14002000	231660000	1341600000	13291000	22597000	64900000	182810000	1903000000	0
Q6AI12	1	Ankyrin repeat domain-containing protein 40	ANKRD40	sp|Q6AI12|ANR40_HUMAN Ankyrin repeat domain-containing protein 40 OS=Homo sapiens OX=9606 GN=ANKRD40 PE=1 SV=2	388930000	63443000	2832700	36722000	27110000	0	21913000	27169000	19673000	230570000	27966000	45151000	48123000	5227000000	446750000	105790000	130950000	7295100	107470000	7339600	7245600	19560000	8196700	20225000	3235200	11929000	33452000	54572000	0	196620000	314510000	634560	97608000	33108000	17632000	136900000	111640000	1219300000	883110000	75169000	184030000	117400000	147230000	3582400	6327700
Q8N8A2;A0A2R8Y7Y4;Q8N8A2-2;Q8N8A2-4;H7C209	10	Serine/threonine-protein phosphatase 6 regulatory ankyrin repeat subunit B	ANKRD44	sp|Q8N8A2|ANR44_HUMAN Serine/threonine-protein phosphatase 6 regulatory ankyrin repeat subunit B OS=Homo sapiens OX=9606 GN=ANKRD44 PE=1 SV=3;tr|A0A2R8Y7Y4|A0A2R8Y7Y4_HUMAN Isoform of Q8N8A2, Serine/threonine-protein phosphatase 6 regulatory ankyrin repeat	1261600000	0	30658000	51345000	1734900	11326000	965410	506600000	19120000	380100000	25227000	67222000	289850000	80118000	58983000	7037000	71744000	2519000	260150000	782140	1976400	1525700	0	9639500	42650000	36940000	32545000	11502000	0	92982000	376010000	358680	38461000	470110000	5082500	42498000	264180000	150010000	55410000	9900900	102240000	103850000	4966000	98847000	51045000
Q8WVL7	1	Ankyrin repeat domain-containing protein 49	ANKRD49	sp|Q8WVL7|ANR49_HUMAN Ankyrin repeat domain-containing protein 49 OS=Homo sapiens OX=9606 GN=ANKRD49 PE=1 SV=1	11073000	13303000	186050	86381000	5128700	5534400	0	4457000	0	20895000	2236700	20461000	40378000	146260000	1795400	3296100	2894800	0	12836000	17815000	0	95704	1236400	286630	0	1843400	528570	14113000	0	205310000	157110000	0	8501400	128720000	0	7286200	17035000	12240000	61401000	1129200	2189000	8059300	9198400	714230	1314800
Q9ULJ7;Q9ULJ7-2	2	Ankyrin repeat domain-containing protein 50	ANKRD50	sp|Q9ULJ7|ANR50_HUMAN Ankyrin repeat domain-containing protein 50 OS=Homo sapiens OX=9606 GN=ANKRD50 PE=1 SV=4;sp|Q9ULJ7-2|ANR50-2_HUMAN Isoform of Q9ULJ7, Isoform 2 of Ankyrin repeat domain-containing protein 50 OS=Homo sapiens OX=9606 GN=ANKRD50 PE=1 SV=	79891000	9060600	560230	0	26577000	55721000	28984000	9066700	1244100	108110000	1438800000	35593000	0	204530000	130100000	335680000	5134900	6466400	165380000	159460000	1982800	7646000	5745500	7057600	7710900	159260000	21796000	49449000	24140000	111350000	251840000	6731400	386560000	15939000	11979000	1102200	191020000	175950000	685170000	227130	15064000	29677000	69378000	17275000	83128000
Q9Y2G4-4;Q9Y2G4-1;Q9Y2G4-3;Q9Y2G4;E5RJ05	6	Ankyrin repeat domain-containing protein 6	ANKRD6	sp|Q9Y2G4-4|ANKR6-4_HUMAN Isoform of Q9Y2G4, Isoform 4 of Ankyrin repeat domain-containing protein 6 OS=Homo sapiens OX=9606 GN=ANKRD6 PE=2 SV=3;sp|Q9Y2G4-1|ANKR6-1_HUMAN Isoform of Q9Y2G4, Isoform 2 of Ankyrin repeat domain-containing protein 6 OS=Homo sa	1977100000	18980000	40073000	88899000	14045000	2844900000	416330000	34491000	398330	3278000	2556400000	343870000	426750000	186110000	534520000	209630000	13620000	0	53889000	1417500000	16719000	295440000	8607000000	14764000	1325800000	250900000	1427800	30995000	5288600	317750000	47357000000	5433100	95576000	898200000	29800000	932950000	375740000	373790000	1435800000	61028000	133250000	516140000	603930000	24205000	171880000
C9JTQ0	1	Ankyrin repeat domain-containing protein 63	ANKRD63	sp|C9JTQ0|ANR63_HUMAN Ankyrin repeat domain-containing protein 63 OS=Homo sapiens OX=9606 GN=ANKRD63 PE=3 SV=1	21256000	16104000	24065000	934980	30239000	8813400	492550	34117000	0	19571000	7169300	4613500	106830000	42821000	36209000	159380000	56313000	192470000	252060000	3305500	16322000	7340700	3564900	50913000	5943100	64672000	5471500	43638000	9900600	33816000	131310000	1272000	17877000	21822000	27284000	72669000	16873000	617530000	39340000	19782000	93397000	72806000	38941000	11959000	1307500
Q7Z6G8;Q7Z6G8-6	3	Ankyrin repeat and sterile alpha motif domain-containing protein 1B	ANKS1B	sp|Q7Z6G8|ANS1B_HUMAN Ankyrin repeat and sterile alpha motif domain-containing protein 1B OS=Homo sapiens OX=9606 GN=ANKS1B PE=1 SV=2;sp|Q7Z6G8-6|ANS1B-6_HUMAN Isoform of Q7Z6G8, Isoform 6 of Ankyrin repeat and sterile alpha motif domain-containing protein	1615100000	251910000	14407000	124160000	6272600	96909000	79549000	182180000	242850	121960000	1725000000	67086000	1200300000	417300000	856010000	50354000	5842900	27129000	212270000	31727000	1538000	93132000	25408000	61037000	426230000	436590000	20178000	554700000	25207000	109720000	3230500000	495880	196170000	17346000	7721200	38090000	45609000	594590000	155960000	37756000	186030000	219130000	101290000	587300000	65858000
H0YI72;Q7Z6G8-3;Q7Z6G8-2;Q7Z6G8-5;Q7Z6G8-4;Q7Z6G8-7;Q7Z6G8-9	14	Ankyrin repeat and sterile alpha motif domain-containing protein 1B	ANKS1B	tr|H0YI72|H0YI72_HUMAN Isoform of Q7Z6G8, Ankyrin repeat and sterile alpha motif domain-containing protein 1B (Fragment) OS=Homo sapiens OX=9606 GN=ANKS1B PE=1 SV=1;sp|Q7Z6G8-3|ANS1B-3_HUMAN Isoform of Q7Z6G8, Isoform 3 of Ankyrin repeat and sterile alpha	6330000	49664000	16551000	52469000	422440	5288400	8474400	61379000	0	9295000	1540600	42935000	0	59577000	40986000	0	0	0	90003000	669120	116370000	26342000	7481000	1404800	9439800	12513000	4556700	25628000	460390	24247000	94815000	6521100	57492000	15265000	94756000	9197300	4047600	35180000	12880000	42474000	5453100	51188000	4746500	81669000	67627000
A6NFN9-3;A6NFN9-1;A6NFN9	4	Protein ANKUB1	ANKUB1	sp|A6NFN9-3|ANKUB-3_HUMAN Isoform of A6NFN9, Isoform 3 of Protein ANKUB1 OS=Homo sapiens OX=9606 GN=ANKUB1 PE=4 SV=3;sp|A6NFN9-1|ANKUB-1_HUMAN Isoform of A6NFN9, Isoform 1 of Protein ANKUB1 OS=Homo sapiens OX=9606 GN=ANKUB1 PE=4 SV=3;sp|A6NFN9|ANKUB_HUMAN	38620000	95278000	0	16906000	32526000	17173000	2538600	28336000	0	4004500000	56188000	50716000	80930000	58446000	11787000	23118000	8523700	0	61620000	751160	0	652660000	11112000	4272200	15358000	28640000	3259000	6897700	0	96586000	5442800000	0	425040000	76431000	15924000	53796000	67135000	107820000	77797000	44209000	16168000	220870	190640000	240420000	9557600
Q9NQW6;Q9NQW6-2	5	Actin-binding protein anillin	ANLN	sp|Q9NQW6|ANLN_HUMAN Anillin OS=Homo sapiens OX=9606 GN=ANLN PE=1 SV=2;sp|Q9NQW6-2|ANLN-2_HUMAN Isoform of Q9NQW6, Isoform 2 of Anillin OS=Homo sapiens OX=9606 GN=ANLN PE=1 SV=2	39133000	23864000	0	71932000	78273000	7508100	12075000	46316000	78815000	15450000	6922600	116790000	77262000	15417000000	43703000	132370000	26253000	0	342420000	3703300	2376200	33120000	11535000	65661000	19176000	107470000	2275300	168610000	0	210570000	215490000	0	113460000	1416500000	1884100	3228000	8638700	419490000	81251000	3105300	34789000	179000000	4299900	7162400	7764800
F5GXT3;Q9NQ90-2;Q9NQ90	3	Anoctamin;Anoctamin-2	ANO2	tr|F5GXT3|F5GXT3_HUMAN Isoform of Q9NQ90, Anoctamin OS=Homo sapiens OX=9606 GN=ANO2 PE=1 SV=2;sp|Q9NQ90-2|ANO2-2_HUMAN Isoform of Q9NQ90, Isoform 2 of Anoctamin-2 OS=Homo sapiens OX=9606 GN=ANO2 PE=1 SV=2;sp|Q9NQ90|ANO2_HUMAN Anoctamin-2 OS=Homo sapiens OX	19476000	468450000	9990500	24355000	3177300	75281000	3255900	45502000	0	15771000	27154000	42752000	182140000	273890000	66183000	41027000	1015500	4389900	75497000	0	1919500000	19076000	60976000	43283000	64749000	17748000	21771000	22888000	5943100	172740000	430950000	6584100	466150000	95761000	60088000	50317000	246100000	185400000	45341000	22053000	63429000	168500000	1484100	10858000	22726000
Q4KMQ2-3;Q4KMQ2;Q4KMQ2-4;Q4KMQ2-2	4	Anoctamin-6	ANO6	sp|Q4KMQ2-3|ANO6-3_HUMAN Isoform of Q4KMQ2, Isoform 3 of Anoctamin-6 OS=Homo sapiens OX=9606 GN=ANO6 PE=1 SV=2;sp|Q4KMQ2|ANO6_HUMAN Anoctamin-6 OS=Homo sapiens OX=9606 GN=ANO6 PE=1 SV=2;sp|Q4KMQ2-4|ANO6-4_HUMAN Isoform of Q4KMQ2, Isoform 4 of Anoctamin-6 O	415820000	71819000	10733000	133160000	139050000	36129000	9541800	109430000	376680	59330000	55751000	120310000	285700000	157310000	131450000	862150000	1431800	29610000	894960000	0	495770	32527000	5254200	102380000	2133900	4767600	1584600	263450000	22423000	859830000	212440000	42171000	96688000	85303000	7808800	89300000	683760000	525490000	112930000	65015000	64093000	279560000	200630000	0	14304000
Q6IWH7-3;Q6IWH7-2	3	Anoctamin-7	ANO7	sp|Q6IWH7-3|ANO7-3_HUMAN Isoform of Q6IWH7, Isoform 3 of Anoctamin-7 OS=Homo sapiens OX=9606 GN=ANO7 PE=1 SV=2;sp|Q6IWH7-2|ANO7-2_HUMAN Isoform of Q6IWH7, Isoform 2 of Anoctamin-7 OS=Homo sapiens OX=9606 GN=ANO7 PE=1 SV=2	33250000	0	510450	12546000	27200000	71725000	4284100	696560	132670	5061500	696590000	8250700	120730000	456430000	38992000	11118000	51211000	830790	23570000	1062900000	329730	91733000	240780000	6021000	22403000	38389000	3744700	37714000	2820400	53954000	10365000	482970	50213000	575110000	7648300	46067000	60120000	1467700000	33648000	0	70658000	34155000	477350000	335220	8231500
Q9HCE9-2;Q9HCE9	2	Anoctamin-8	ANO8	sp|Q9HCE9-2|ANO8-2_HUMAN Isoform of Q9HCE9, Isoform 2 of Anoctamin-8 OS=Homo sapiens OX=9606 GN=ANO8 PE=1 SV=3;sp|Q9HCE9|ANO8_HUMAN Anoctamin-8 OS=Homo sapiens OX=9606 GN=ANO8 PE=1 SV=3	116330000	49305000	45135000	41097000	9360700	31637000	41725000	27884000	7046200	45426000	25310000	133600000	261350000	87273000	433990000	511620000	16229000	18452000	153500000	8911400	2609000	32251000	111470000	78552000	27482000	92896000	359920000	123570000	743870	279840000	144770000	56357000	1168400000	47231000	32291000	39147000	266750000	91170000	218980000	378250	13835000	714440000	488590000	114940000	111720000
P39687;H0YN26	3	Acidic leucine-rich nuclear phosphoprotein 32 family member A	ANP32A	sp|P39687|AN32A_HUMAN Acidic leucine-rich nuclear phosphoprotein 32 family member A OS=Homo sapiens OX=9606 GN=ANP32A PE=1 SV=1;tr|H0YN26|H0YN26_HUMAN Isoform of P39687, Acidic leucine-rich nuclear phosphoprotein 32 family member A OS=Homo sapiens OX=9606	108100000	290250000	6176300	97008000	367080000	52470000	5085100	50114000	5041500	102570000	476680000	224570000	8539300000	916160000	211390000	5187000000	578460000	392830000	73486000	30836000	443470000	736290000	68317000	238490000	602250000	585340000	223250000	86665000	224380000	407610000	861540000	608140000	3206300000	411180000	109400000	892940000	615750000	1680900000	2189600000	348340000	1021100000	6499600000	2663300000	34464000	965430000
Q92688-2;Q92688	2	Acidic leucine-rich nuclear phosphoprotein 32 family member B	ANP32B	sp|Q92688-2|AN32B-2_HUMAN Isoform of Q92688, Isoform 2 of Acidic leucine-rich nuclear phosphoprotein 32 family member B OS=Homo sapiens OX=9606 GN=ANP32B PE=1 SV=1;sp|Q92688|AN32B_HUMAN Acidic leucine-rich nuclear phosphoprotein 32 family member B OS=Homo	2265600	60391000	0	125200000	510710000	31647000	0	114990000	0	37864000	154130000	24645000	340910000	842360000	7565400	528240000	192330000	710390000	0	110270000	622320000	729470000	0	133570000	36933000	104090000	214920000	5678100	470110000	72011000	35645000	37876000	54021000000	274190000	5532000	235770000	801050000	202940000	458530000	57078000	307260000	88172000	453330000	0	453420000
Q9BTT0-3;Q9BTT0;E9PPH5	6	Acidic leucine-rich nuclear phosphoprotein 32 family member E	ANP32E	sp|Q9BTT0-3|AN32E-3_HUMAN Isoform of Q9BTT0, Isoform 3 of Acidic leucine-rich nuclear phosphoprotein 32 family member E OS=Homo sapiens OX=9606 GN=ANP32E PE=1 SV=1;sp|Q9BTT0|AN32E_HUMAN Acidic leucine-rich nuclear phosphoprotein 32 family member E OS=Homo	98868000	79780000	15453000	114630000	0	57668000	24144000	119390000	797470	404420000	10827000	13260000	3974500000	66284000	153620000	3708900	26568000	2052600	379000000	70280000	26365000	52537000	26291000	44574000	619050000	3063500	61401000	17482000	6994400	103270000	10830000	1583300	0	16002000	0	21459000	32424000	412590000	3575100	7165100	96965000	90751000	91314000	109530000	16514000
P15144	3	Aminopeptidase N	ANPEP	sp|P15144|AMPN_HUMAN Aminopeptidase N OS=Homo sapiens OX=9606 GN=ANPEP PE=1 SV=4	4166300000	153360000	270860000	134180000	100770000	75423000	35204000	206420000	8138800	7128700000	244500000	141330000	193420000	1748100000	315450000	1274000000	425160000	20911000	378300000	29788000	249370000	274480000	58774000	3210800000	42942000	1128500000	223410000	428950000	10235000	541150000	18053000000	259680000	1038500000	166280000	115910000	49610000	70339000	160980000	242730000	185530000	180710000	3025100000	850330000	57354000	197460000
Q9H6X2-5;Q9H6X2	6	Anthrax toxin receptor 1	ANTXR1	sp|Q9H6X2-5|ANTR1-5_HUMAN Isoform of Q9H6X2, Isoform 5 of Anthrax toxin receptor 1 OS=Homo sapiens OX=9606 GN=ANTXR1 PE=1 SV=2;sp|Q9H6X2|ANTR1_HUMAN Anthrax toxin receptor 1 OS=Homo sapiens OX=9606 GN=ANTXR1 PE=1 SV=2	4421000	0	0	1198700	0	2291600	74041	36637000	0	0	0	6280800	0	18708000	0	0	0	0	2030400	0	0	0	0	0	0	0	0	0	0	30797000	0	0	0	0	3922900	5897400	0	2876600	0	4730600	33436000	72841000	0	0	0
P04083;Q5T3N1	3	Annexin A1;Annexin	ANXA1	sp|P04083|ANXA1_HUMAN Annexin A1 OS=Homo sapiens OX=9606 GN=ANXA1 PE=1 SV=2;tr|Q5T3N1|Q5T3N1_HUMAN Isoform of P04083, Annexin (Fragment) OS=Homo sapiens OX=9606 GN=ANXA1 PE=1 SV=1	102570000	569950000	97195000	1421000000	392590000	69751000	20690000	28720000	417090	283370000	183230000	222570000	1815300000	5074800000	345950000	174250000	91256000	41920000	1261400000	77232000	56660000	51289000	79762000	209530000	2595800000	72687000	558170000	75870000	29905000	1000800000	1912500000	69361000	150970000	403920000	1959300000	439860000	63815000	7081400000	981360000	324660000	247570000	1825600000	84882000	6651100000	459400000
P50995-2;P50995	4	Annexin A11	ANXA11	sp|P50995-2|ANX11-2_HUMAN Isoform of P50995, Isoform 2 of Annexin A11 OS=Homo sapiens OX=9606 GN=ANXA11 PE=1 SV=1;sp|P50995|ANX11_HUMAN Annexin A11 OS=Homo sapiens OX=9606 GN=ANXA11 PE=1 SV=1	1248600000	791960000	21196000	245030000	108620000	8376500	833210000	354970000	236900000	2244100000	883570000	3218400000	224660000	964620000	1464400000	1180000000	368030000	137250000	1354400000	1045600000	105480000	761500000	1236700000	607750000	82256000	2498400000	93725000	1030600000	14459000	1711500000	1811600000	16349000	368800000	66450000	39008000	1233300000	472440000	1059700000	2276800000	340140000	140730000	3970300000	490000000	327060000	54418000
P07355-2;P07355;H0YN42;H0YMU9;H0YMD0;H0YM50;H0YKS4;H0YNP5	20	Annexin A2;Annexin	ANXA2	sp|P07355-2|ANXA2-2_HUMAN Isoform of P07355, Isoform 2 of Annexin A2 OS=Homo sapiens OX=9606 GN=ANXA2 PE=1 SV=2;sp|P07355|ANXA2_HUMAN Annexin A2 OS=Homo sapiens OX=9606 GN=ANXA2 PE=1 SV=2;tr|H0YN42|H0YN42_HUMAN Isoform of P07355, Annexin (Fragment) OS=Homo	1327600000	1066700000	242410000	688830000	460960000	1247300000	313460000	910460000	531760000	1706000000	2640000000	511830000	14645000000	20941000000	6055300000	1529000000	822770000	328860000	1991600000	1086500000	155940000	548460000	1124700000	3489800000	14078000000	645440000	1180200000	2776500000	607450000	2978600000	14860000000	721140000	2145700000	2418700000	16986000000	3023600000	1547400000	35791000000	7629000000	209340000	1495100000	3944000000	1283500000	108270000000	837130000
P12429	4	Annexin A3	ANXA3	sp|P12429|ANXA3_HUMAN Annexin A3 OS=Homo sapiens OX=9606 GN=ANXA3 PE=1 SV=3	242230000	19513000	73484000	4408000	8873900	3852400	27254000	58152000	1032700	96845000	28449000	160000000	34476000	858770000	0	60946000	10186000	10712000	162210000	21341000	96588	55740000	9424300	20312000	52623000	15397000	7018900	112470000	744670	46731000	378040000	7915000	365480000	37583000	17623000	106130000	142630000	174290000	95787000	495000	79755000	401970000	20027000	1258500	44548000
P09525;P09525-2	2	Annexin A4	ANXA4	sp|P09525|ANXA4_HUMAN Annexin A4 OS=Homo sapiens OX=9606 GN=ANXA4 PE=1 SV=4;sp|P09525-2|ANXA4-2_HUMAN Isoform of P09525, Isoform 2 of Annexin A4 OS=Homo sapiens OX=9606 GN=ANXA4 PE=1 SV=4	1413100	6750000	40510000	52002000	4535500	5011500	1471000	6465300	752980	50924000	74014000	42978000	973460000	2350000000	133560000	85703000	5172500	0	198980000	8519700	5959400	150520000	8997300	59191000	3274900000	4599200	5283700	517720000	0	54763000	1685100000	28758	331290000	33054000	2131800000	57305000	60152000	2255000000	116540000	4043100	26730000	22404000	16442000	5074800000	141120000
P08758;D6RBL5;D6RBE9	5	Annexin A5;Annexin	ANXA5	sp|P08758|ANXA5_HUMAN Annexin A5 OS=Homo sapiens OX=9606 GN=ANXA5 PE=1 SV=2;tr|D6RBL5|D6RBL5_HUMAN Isoform of P08758, Annexin OS=Homo sapiens OX=9606 GN=ANXA5 PE=1 SV=1;tr|D6RBE9|D6RBE9_HUMAN Isoform of P08758, Annexin OS=Homo sapiens OX=9606 GN=ANXA5 PE=1	12536000	294650000	10447000	41055000	7674300	3412200	8834100	23186000	6124100	10136000	79198000	93480000	681870000	485960000	100730000	231370000	15753000	144450	222190000	14823000	8329500	47363000	31227000	19183000	2691300000	27605000	11820000	270680000	692010	166700000	395280000	119460	130100000	151300000	2071000000	270380000	59876000	1343700000	340080000	56493000	59670000	396380000	13954000	4626900000	479950
P08133;P08133-2	5	Annexin A6	ANXA6	sp|P08133|ANXA6_HUMAN Annexin A6 OS=Homo sapiens OX=9606 GN=ANXA6 PE=1 SV=3;sp|P08133-2|ANXA6-2_HUMAN Isoform of P08133, Isoform 2 of Annexin A6 OS=Homo sapiens OX=9606 GN=ANXA6 PE=1 SV=3	33835000	33477000	6112600	42300000	28129000	10224000	4748200	131370000	44441000	397940000	658100000	245500000	713140000	748990000	185350000	389190000	31401000	22679000	770310000	85485000	122880000	49373000	16692000	8019100	445270000	193760000	679260000	1778100000	10862000	263910000	315720000	3088200	2174500000	74574000	627420000	298340000	137850000	898720000	1673700000	158290000	701760000	1027100000	702650000	12996000	167140000
P20073-2;P20073	2	Annexin A7	ANXA7	sp|P20073-2|ANXA7-2_HUMAN Isoform of P20073, Isoform 2 of Annexin A7 OS=Homo sapiens OX=9606 GN=ANXA7 PE=1 SV=3;sp|P20073|ANXA7_HUMAN Annexin A7 OS=Homo sapiens OX=9606 GN=ANXA7 PE=1 SV=3	12365000000	29170000000	3334900000	7320100000	2892300000	3954100000	8505900000	8611900000	911440000	16490000000	7166500000	30460000000	6078300000	23273000000	22907000000	5616800000	2949400000	2268900000	27814000000	4625400000	1231600000	11948000000	12851000000	8266400000	6322300000	17853000000	4135100000	13896000000	458270000	15206000000	40484000000	1262400000	8903600000	6110900000	4677100000	9978800000	6628800000	21243000000	10143000000	5147000000	9306800000	23235000000	3545200000	7062900000	4411500000
Q5VT79;B4DTF2;A0A075B752;P13928;A0A087WUP0;A0A087WTN9;P13928-3;Q5VT79-2	10	Annexin A8-like protein 2;Annexin;Annexin A8	ANXA8L2;ANXA8L1;ANXA8	sp|Q5VT79|AXA81_HUMAN Annexin A8-like protein 1 OS=Homo sapiens OX=9606 GN=ANXA8L1 PE=2 SV=2;tr|B4DTF2|B4DTF2_HUMAN Isoform of Q5VT79, Annexin OS=Homo sapiens OX=9606 GN=ANXA8L1 PE=1 SV=1;tr|A0A075B752|A0A075B752_HUMAN Isoform of Q5VT79, Annexin OS=Homo sa	4789100	28879000	292600	31137000	62740000	13093000	0	57521000	1936400	1012200000	13175000	6684400	670500000	1135900000	384880000	8365900	5205200	0	238780000	7318100	138970000	785940	13358000	64285000	3611100000	10378000	9479400	90300000	8313600	175600000	1625700000	103430000	801890000	342330000	987030000	1399200000	15113000	2759100000	175000000	1114500	2797100	97595000	38734000	8248000000	69233000
O76027	1	Annexin A9	ANXA9	sp|O76027|ANXA9_HUMAN Annexin A9 OS=Homo sapiens OX=9606 GN=ANXA9 PE=1 SV=3	9982900	1371400	0	0	5211000	1418100	1067200	372110	0	0	589760	4812800	0	4716800	1220500	3013900	0	668120	220530000	0	0	0	0	0	9575500	0	0	51795000	0	6783400	66532000	0	69017000	4541300	2626100000	13950000	12461000	296200000	4257600	0	24632000	135920000	2255400	5034200	122660
Q16853;Q16853-2	5	Membrane primary amine oxidase	AOC3	sp|Q16853|AOC3_HUMAN Membrane primary amine oxidase OS=Homo sapiens OX=9606 GN=AOC3 PE=1 SV=3;sp|Q16853-2|AOC3-2_HUMAN Isoform of Q16853, Isoform 2 of Membrane primary amine oxidase OS=Homo sapiens OX=9606 GN=AOC3 PE=1 SV=3	185780000	1240500000	2965000	223270000	399620000	983570	4016100	467350000	1916300	64545000	10439000	12499000	218930000	211970000	54989000	48475000	19674000	57587000	3150100000	92849000	18812000	34391000	5168200	8071700	81168000	17433000	0	874700000	80066000	333130000	2934700000	0	1837800000	439900000	9289400	194090000	87740000	4857900000	44554000	28049000	65756000	237260000	215070000	1752800	53240000
Q06278	4	Aldehyde oxidase	AOX1	sp|Q06278|AOXA_HUMAN Aldehyde oxidase OS=Homo sapiens OX=9606 GN=AOX1 PE=1 SV=2	155140000	266690000	6822100	251280000	21211000	162700000	45939000	243070000	8485800	536270000	3267600000	56015000	2568600000	626050000	173950000	14180000000	91939000	41093000	4049100000	3423000	3656700	190850000	38735000	1426800000	46209000	154070000	9792900	173690000	1461900	1157300000	1334300000	24083000	3919700000	416920000	39242000	107740000	223340000	8130700000	184580000	314880000	307280000	212880000	347180000	1002800000	254660000
Q10567-2;Q10567;C9J1E7	4	AP-1 complex subunit beta-1	AP1B1	sp|Q10567-2|AP1B1-2_HUMAN Isoform of Q10567, Isoform B of AP-1 complex subunit beta-1 OS=Homo sapiens OX=9606 GN=AP1B1 PE=1 SV=2;sp|Q10567|AP1B1_HUMAN AP-1 complex subunit beta-1 OS=Homo sapiens OX=9606 GN=AP1B1 PE=1 SV=2;tr|C9J1E7|C9J1E7_HUMAN Isoform of	1553500000	1418800000	243620000	1485500000	652640000	881140000	276850000	1429800000	568980000	3516500000	1206800000	1170600000	5089200000	5080300000	1253100000	2163400000	1025600000	767070000	4137500000	156380000	334840000	1579700000	624790000	1226000000	945460000	1934700000	1345900000	270070000	233050000	2973800000	6114200000	322700000	3278600000	2774100000	517580000	3201100000	3252900000	6579100000	3409800000	556320000	2489400000	2979200000	2258800000	2963600000	1020500000
O43747;O43747-2	13	AP-1 complex subunit gamma-1	AP1G1	sp|O43747|AP1G1_HUMAN AP-1 complex subunit gamma-1 OS=Homo sapiens OX=9606 GN=AP1G1 PE=1 SV=5;sp|O43747-2|AP1G1-2_HUMAN Isoform of O43747, Isoform 2 of AP-1 complex subunit gamma-1 OS=Homo sapiens OX=9606 GN=AP1G1 PE=1 SV=5	38424000	292840000	17317000	897590000	351700000	730570000	24447000	89783000	154960000	413880000	903040000	65593000	2599000000	719790000	764930000	1974800000	858370000	709630000	389840000	12640000	180920000	274130000	34038000	175930000	355400000	627990000	938000000	115920000	111800000	889930000	1911000000	81143000	1181800000	1044000000	365670000	1111300000	2389100000	5532900000	3011100000	142950000	981150000	1328500000	1473200000	298770000	677120000
O75843	6	AP-1 complex subunit gamma-like 2	AP1G2	sp|O75843|AP1G2_HUMAN AP-1 complex subunit gamma-like 2 OS=Homo sapiens OX=9606 GN=AP1G2 PE=1 SV=1	190970000	75029000	356340	15873000	2365600	15043000	4660800	119600000	0	164060000	7846900	289670000	251810000	1210100000	109610000	98946000	45663000	3090300	434520000	4952600	0	29513000	20466000	36728000	12446000	5666400	1614600	114150000	32693000	211200000	46827000000	2264400	191310000	124020000	96467000	62509000	54344000	168740000	304880000	0	56822000	130510000	100430000	12814000	1049300
Q9BXS5;E7ENJ6;Q9BXS5-2;K7EJL1	11	AP-1 complex subunit mu-1	AP1M1	sp|Q9BXS5|AP1M1_HUMAN AP-1 complex subunit mu-1 OS=Homo sapiens OX=9606 GN=AP1M1 PE=1 SV=3;tr|E7ENJ6|E7ENJ6_HUMAN Isoform of Q9BXS5, AP-1 complex subunit mu-1 OS=Homo sapiens OX=9606 GN=AP1M1 PE=1 SV=1;sp|Q9BXS5-2|AP1M1-2_HUMAN Isoform of Q9BXS5, Isoform 2	180930000	243850000	6625400	8604500000	393410000	472640000	16735000	111660000	0	805370000	962130000	183680000	1608300000	759980000	254790000	2961300000	7482500000	2233000000	707810000	21442000	400420000	312140000	83076000	242660000	375550000	2004700000	1022000000	21123000	95096000	972170000	3194200000	343550000	1363200000	878550000	187820000	2782000000	7118200000	3972600000	4439100000	106390000	841290000	916420000	3322500000	283690000	1150900000
Q9Y6Q5;Q9Y6Q5-2;K7EPR4;K7EJJ1	7	AP-1 complex subunit mu-2	AP1M2	sp|Q9Y6Q5|AP1M2_HUMAN AP-1 complex subunit mu-2 OS=Homo sapiens OX=9606 GN=AP1M2 PE=1 SV=4;sp|Q9Y6Q5-2|AP1M2-2_HUMAN Isoform of Q9Y6Q5, Isoform 2 of AP-1 complex subunit mu-2 OS=Homo sapiens OX=9606 GN=AP1M2 PE=1 SV=4;tr|K7EPR4|K7EPR4_HUMAN Isoform of Q9Y6	554400	5843200	2984600	0	453670	0	0	10319000	2111900	4321700	12577000	0	22352000	146480000	1144600000	13800000	614420	53947000	9666900	0	0	0	313000	0	72127000	3246500	2319500	11436000	0	61380000	40079000	0	74301000	5785900	18578000	37218000	0	251290000	0	8227900	0	0	2463100	39240000000	0
H7C1E4;A0A2R8YGH5;P61966;P61966-2	4	AP-1 complex subunit sigma-1A	AP1S1	tr|H7C1E4|H7C1E4_HUMAN Isoform of P61966, AP complex subunit sigma (Fragment) OS=Homo sapiens OX=9606 GN=AP1S1 PE=1 SV=1;tr|A0A2R8YGH5|A0A2R8YGH5_HUMAN Isoform of P61966, AP complex subunit sigma OS=Homo sapiens OX=9606 GN=AP1S1 PE=1 SV=1;sp|P61966|AP1S1_H	549980	16525000	824200	67419000	17675000	43896000	0	6129900	0	35307000	59647000	1401700	92794000	50123000	0	66582000	56046000	22689000	12421000	0	21700000	5473100	2431900	9350900	94736000	37663000	6146400	40474000	7066800	32000000	97550000	8508500	10606000	31876000	39474000	96375000	79801000	273450000	132270000	12447000	31603000	121620000	55088000	93271000	59564000
F6SFB5;A6NH01;H7BZG6;H0Y673	4		AP1S2	tr|F6SFB5|F6SFB5_HUMAN Isoform of P56377, AP complex subunit sigma OS=Homo sapiens OX=9606 GN=AP1S2 PE=1 SV=1;tr|A6NH01|A6NH01_HUMAN Isoform of P56377, AP complex subunit sigma OS=Homo sapiens OX=9606 GN=AP1S2 PE=1 SV=1;tr|H7BZG6|H7BZG6_HUMAN Isoform of P5	13215000	5388500	0	95768000	34974000	42227000	3304100	10894000	0	47530000	64091000	19697000	141750000	155710000	1864600000	305970000	51853000	29506000	447910000	18794000	13720000	357060	8170000	25904000	14498000	35915000	6122300	0	12535000	1804900000	98591000	15982000	22945000	71916000	52476000	122400000	180810000	253020000	246110000	6212600	55137000	46688000	161650000	58002000	48940000
O95782-2;O95782	2	AP-2 complex subunit alpha-1	AP2A1	sp|O95782-2|AP2A1-2_HUMAN Isoform of O95782, Isoform B of AP-2 complex subunit alpha-1 OS=Homo sapiens OX=9606 GN=AP2A1 PE=1 SV=3;sp|O95782|AP2A1_HUMAN AP-2 complex subunit alpha-1 OS=Homo sapiens OX=9606 GN=AP2A1 PE=1 SV=3	19389000000	15547000000	2360200000	3547600000	4981500000	4016200000	2973400000	12203000000	2817900000	15240000000	5443800000	12271000000	17998000000	21420000000	17462000000	8419600000	3045100000	3038400000	33595000000	1768800000	1012700000	8074900000	6386800000	7744700000	6818200000	10858000000	6581200000	4756600000	1489500000	9796100000	37620000000	1513200000	15187000000	9941600000	3285600000	12226000000	12069000000	27012000000	15217000000	2022300000	14016000000	22766000000	8766700000	3622000000	5897700000
O94973-2;O94973-3;A0A0G2JQM1	3	AP-2 complex subunit alpha-2	AP2A2	sp|O94973-2|AP2A2-2_HUMAN Isoform of O94973, Isoform 2 of AP-2 complex subunit alpha-2 OS=Homo sapiens OX=9606 GN=AP2A2 PE=1 SV=2;sp|O94973-3|AP2A2-3_HUMAN Isoform of O94973, Isoform 3 of AP-2 complex subunit alpha-2 OS=Homo sapiens OX=9606 GN=AP2A2 PE=1 S	7404700000	6815300000	898360000	1715000000	2139800000	1877800000	951500000	4383200000	1185300000	5583600000	2019100000	4874300000	5822900000	11517000000	6775300000	2513100000	1065700000	830560000	14309000000	460370000	304270000	3907200000	1949900000	2712600000	1989800000	4558000000	2147500000	1246900000	395500000	5101900000	14125000000	335600000	5909200000	2863800000	795390000	3490400000	2948100000	9181100000	4692500000	648250000	3094400000	5922300000	2092900000	951110000	2771000000
P63010;P63010-2;A0A087X253;P63010-3;A0A087WU93;A0A087WZQ6;A0A087WYD1	12	AP-2 complex subunit beta	AP2B1	sp|P63010|AP2B1_HUMAN AP-2 complex subunit beta OS=Homo sapiens OX=9606 GN=AP2B1 PE=1 SV=1;sp|P63010-2|AP2B1-2_HUMAN Isoform of P63010, Isoform 2 of AP-2 complex subunit beta OS=Homo sapiens OX=9606 GN=AP2B1 PE=1 SV=1;tr|A0A087X253|A0A087X253_HUMAN Isoform	30386000000	20536000000	3182900000	5870700000	6985600000	5459500000	3216500000	15009000000	4730100000	26179000000	7650700000	16874000000	25032000000	31470000000	21199000000	9926500000	4453900000	5138700000	44563000000	3043400000	1743100000	13964000000	6037700000	9807500000	8802000000	14619000000	7668900000	10302000000	2333800000	19508000000	48704000000	1884700000	23283000000	13481000000	3928700000	15929000000	15647000000	33873000000	18361000000	2676900000	14054000000	29160000000	12016000000	4633000000	7359300000
A0A087WY71;Q96CW1-2;Q96CW1;E9PFW3;C9JJ47	10	AP-2 complex subunit mu	AP2M1	tr|A0A087WY71|A0A087WY71_HUMAN Isoform of Q96CW1, AP-2 complex subunit mu OS=Homo sapiens OX=9606 GN=AP2M1 PE=1 SV=1;sp|Q96CW1-2|AP2M1-2_HUMAN Isoform of Q96CW1, Isoform 2 of AP-2 complex subunit mu OS=Homo sapiens OX=9606 GN=AP2M1 PE=1 SV=2;sp|Q96CW1|AP2M	3702800000	6746800000	1033600000	1662000000	2004000000	1858000000	837330000	2467800000	192460000	7144200000	2951800000	7567800000	5123300000	6351300000	4804200000	6936400000	2256000000	2133900000	15929000000	573690000	834680000	2392900000	1637200000	3001600000	2375300000	5315400000	3344900000	2202300000	548810000	3907900000	17928000000	855340000	6327000000	4831200000	842510000	6728600000	8537900000	10426000000	7161100000	522150000	4777300000	8492500000	4807200000	890060000	3998200000
M0R0N4;M0QYZ2;P53680;X6R390;P53680-2	6	AP-2 complex subunit sigma	AP2S1	tr|M0R0N4|M0R0N4_HUMAN Isoform of P53680, AP complex subunit sigma OS=Homo sapiens OX=9606 GN=AP2S1 PE=1 SV=1;tr|M0QYZ2|M0QYZ2_HUMAN Isoform of P53680, AP complex subunit sigma OS=Homo sapiens OX=9606 GN=AP2S1 PE=1 SV=1;sp|P53680|AP2S1_HUMAN AP-2 complex s	928480000	510400000	44399000	114580000	225230000	135680000	96398000	201990000	0	691370000	234880000	490310000	432650000	628350000	616450000	583990000	146890000	35910000	922200000	50140000	81083000	0	124070000	175950000	322230000	313600000	204760000	364860000	80869000	506020000	3405100000	79723000	1097600000	465730000	209210000	167200000	640660000	1077500000	307330000	46820000	193150000	520550000	164450000	82002000	235250000
O00203;O00203-3	3	AP-3 complex subunit beta-1	AP3B1	sp|O00203|AP3B1_HUMAN AP-3 complex subunit beta-1 OS=Homo sapiens OX=9606 GN=AP3B1 PE=1 SV=3;sp|O00203-3|AP3B1-3_HUMAN Isoform of O00203, Isoform 2 of AP-3 complex subunit beta-1 OS=Homo sapiens OX=9606 GN=AP3B1 PE=1 SV=3	251910000	94803000	189870000	188850000	84523000	7422000	41663000	281800000	13061000	55529000	86569000	38073000	174000000	485770000	35741000	306810000	75115000	38106000	556940000	0	53196000	1162200	64994000	32034000	28060000	66772000	252360000	79664000	2804000	122570000	522670000	4617800	1269900000	75491000	133480000	342900000	247350000	465500000	119040000	2184100	169390000	379860000	113320000	169590000	32380000
Q13367;Q13367-4	3	AP-3 complex subunit beta-2	AP3B2	sp|Q13367|AP3B2_HUMAN AP-3 complex subunit beta-2 OS=Homo sapiens OX=9606 GN=AP3B2 PE=1 SV=2;sp|Q13367-4|AP3B2-4_HUMAN Isoform of Q13367, Isoform 4 of AP-3 complex subunit beta-2 OS=Homo sapiens OX=9606 GN=AP3B2 PE=1 SV=2	468160000	108970000	20477000	517020000	29864000	170670000	685150000	178170000	39590000	169710000	302260000	62610000	2293700000	679870000	298120000	604020000	980770000	638510000	4448500000	26179000	142880000	39959000	103620000	161480000	274450000	557960000	1197900000	145750000	41811000	871060000	1123400000	66342000	648550000	1115400000	349770000	11263000000	4894800000	3862300000	2434600000	17701000	866560000	851320000	3443900000	265140000	829720000
O14617;O14617-5;O14617-4;O14617-2;O14617-3;A0A2R8Y611	10	AP-3 complex subunit delta-1	AP3D1	sp|O14617|AP3D1_HUMAN AP-3 complex subunit delta-1 OS=Homo sapiens OX=9606 GN=AP3D1 PE=1 SV=1;sp|O14617-5|AP3D1-5_HUMAN Isoform of O14617, Isoform 5 of AP-3 complex subunit delta-1 OS=Homo sapiens OX=9606 GN=AP3D1 PE=1 SV=1;sp|O14617-4|AP3D1-4_HUMAN Isofor	911380000	67536000	32761000	1355500000	47507000	177400000	59439000	7549800	3174200	375690000	277100000	151660000	3009300000	1391400000	760080000	323230000	1431100000	445450000	256840000	23814000	93511000	39441000	96029000	60075000	480220000	516780000	1088400000	106780000	1712000	142230000	1541400000	19102000	196970000	936850000	104830000	1712400000	2517800000	2231400000	2224400000	31038000	1153400000	731060000	1306100000	164450000	152650000
Q9Y2T2	1	AP-3 complex subunit mu-1	AP3M1	sp|Q9Y2T2|AP3M1_HUMAN AP-3 complex subunit mu-1 OS=Homo sapiens OX=9606 GN=AP3M1 PE=1 SV=1	189200000	198030000	0	23648000	105790000	37254000	33048000	0	0	391150000	38378000	4557500	201790000	25128000	0	33567000	98154000	51643000	79321000	51765000	2994900	20167000	0	646400000	6294600	2502700	23632000	30925000	236020	115070000	16438000000	0	53078000	77402000	10131000	45646000	168060000	543650000	181950000	206060	16310000	94637000	92965000	25750000	20872000
P53677;E7ER80;P53677-2	6	AP-3 complex subunit mu-2	AP3M2	sp|P53677|AP3M2_HUMAN AP-3 complex subunit mu-2 OS=Homo sapiens OX=9606 GN=AP3M2 PE=2 SV=1;tr|E7ER80|E7ER80_HUMAN Isoform of P53677, AP-3 complex subunit mu-2 OS=Homo sapiens OX=9606 GN=AP3M2 PE=1 SV=1;sp|P53677-2|AP3M2-2_HUMAN Isoform of P53677, Isoform 2	342160000	50067000	15398000	1309200000	42279000	164020000	7934600	52322000	5777700	109480000	1306600000	88483000	806840000	135480000	85144000	333700000	316710000	232640000	202170000	1018400	48434000	37387000	514350000	28387000	81322000	275440000	478640000	121710000	1579800	105550000	10292000000	15518000	374240000	396620000	105680000	273340000	1162100000	1020300000	998140000	26598000	160790000	211510000	595880000	52438000	839660000
Q92572	1	AP-3 complex subunit sigma-1	AP3S1	sp|Q92572|AP3S1_HUMAN AP-3 complex subunit sigma-1 OS=Homo sapiens OX=9606 GN=AP3S1 PE=1 SV=1	0	2767500000	863340	21348000	11778000	24493000	1414600	15158000	0	14823000	71478000	5448300	121920000	606770000	7683800000	176620000	266650000	23473000	119450000	1751300	12359000	2891500000	0	3150900	31730000	2598200000	0	54640000	1456600	215460000	336490000	8047100	241260000	146150000	274940000	329630000	657350000	701240000	1466100000	6703700	7138500000	533910000	303890000	19723000	11812000
H0YLI7;P59780;H0YLX6;H0YN38;P59780-2	8	AP-3 complex subunit sigma-2	AP3S2	tr|H0YLI7|H0YLI7_HUMAN Isoform of P59780, AP-3 complex subunit sigma-2 OS=Homo sapiens OX=9606 GN=AP3S2 PE=1 SV=1;sp|P59780|AP3S2_HUMAN AP-3 complex subunit sigma-2 OS=Homo sapiens OX=9606 GN=AP3S2 PE=2 SV=1;tr|H0YLX6|H0YLX6_HUMAN Isoform of P59780, AP-3 c	1278100	32849000	410510	17457000	5351400	19007000	660090	6589600	5489400	6158900	18912000	1483300	161760000	75947000	39594000	157670000	45396000	25183000	129700000	22052000	7362100	34677000	18959000	31446000	48204000	34986000	13483000	31484000	1147900	33627000	68604000	7149400	81748000	76733000	15511000	148570000	278160000	176060000	157320000	6892400	67936000	235040000	71013000	44713000	7911300
Q9Y587;G3V3X7;G3V4P7;G3V5J6;Q9Y587-3;Q9Y587-4;Q9Y587-2	7	AP-4 complex subunit sigma-1	AP4S1	sp|Q9Y587|AP4S1_HUMAN AP-4 complex subunit sigma-1 OS=Homo sapiens OX=9606 GN=AP4S1 PE=1 SV=1;tr|G3V3X7|G3V3X7_HUMAN Isoform of Q9Y587, AP complex subunit sigma (Fragment) OS=Homo sapiens OX=9606 GN=AP4S1 PE=1 SV=1;tr|G3V4P7|G3V4P7_HUMAN Isoform of Q9Y587,	37952000	6455400	0	1243300	0	737900	2586700	0	0	433020	0	4879900	8738300	45670000	168730000	87241000	53229000	185770	74919000	0	1378500	0	1804600	7760500	480960	936480	0	21588000	1137400	30039000	136010000	0	375870000	0	7214400	20197000	4432100	7181500	28485000	1702500	5638300	173870000	18280000	27616000	0
Q2VPB7	1	AP-5 complex subunit beta-1	AP5B1	sp|Q2VPB7|AP5B1_HUMAN AP-5 complex subunit beta-1 OS=Homo sapiens OX=9606 GN=AP5B1 PE=1 SV=4	12369000	22916000	218420000	17993000	67624000	459650000	0	12929000	574560	6859600	265140000	6276700	431820000	388440000	191860000	42897000	816520	0	3146400000	132990000	194250000	137980000	15471000	5078000	0	125570000	100110000	100060000	0	8482500	99961000	0	2590700000	300590000	89180000	103400000	9290300	792340000	100710000	2935700	52189000	35878000	213610000	70986000	21538000
Q9NUS5;A2A2L4	3	AP-5 complex subunit sigma-1	AP5S1	sp|Q9NUS5|AP5S1_HUMAN AP-5 complex subunit sigma-1 OS=Homo sapiens OX=9606 GN=AP5S1 PE=1 SV=1;tr|A2A2L4|A2A2L4_HUMAN Isoform of Q9NUS5, AP-5 complex subunit sigma-1 (Fragment) OS=Homo sapiens OX=9606 GN=AP5S1 PE=1 SV=1	0	2014700	2652900	13252000	12582000	15524000	0	770410	1400100	218540000	7427600	2595600	57790000	79557000	12876000	33443000	1848700	503420	11344000	0	772800	40017000	4648900	0	1257000	5150600	5227600	25778000	1621200	7627500	23489000	861150	30746000	44759000	3695600	657750	7445000	11474000	0	512170	2303600	12762000	28628000	1080500	422400
C9JLV4;O14727-5;O14727-3;O14727-4;O14727-2;O14727	8	Apoptotic protease-activating factor 1	APAF1	tr|C9JLV4|C9JLV4_HUMAN Isoform of O14727, Apoptotic protease-activating factor 1 OS=Homo sapiens OX=9606 GN=APAF1 PE=1 SV=1;sp|O14727-5|APAF-5_HUMAN Isoform of O14727, Isoform 5 of Apoptotic protease-activating factor 1 OS=Homo sapiens OX=9606 GN=APAF1 PE=	108720000	758610000	7765700	34044000	0	15920000	11997000	232090000	4111600	400230000	23820000	176530000	54352000	161360000	54737000	0	1527000	14021000	205110000	0	0	127170000	107020000	213360000	387150000	350920000	0	46657000	10624000	128290000	470990000	0	82561000	4742900	655530000	8654700	93003000	73470000	0	31774000	62492000	0	18281000	239610000	1887200
Q02410-2;Q02410;A0A0G2JMD7	4	Amyloid beta A4 precursor protein-binding family A member 1	APBA1	sp|Q02410-2|APBA1-2_HUMAN Isoform of Q02410, Isoform 2 of Amyloid-beta A4 precursor protein-binding family A member 1 OS=Homo sapiens OX=9606 GN=APBA1 PE=1 SV=3;sp|Q02410|APBA1_HUMAN Amyloid-beta A4 precursor protein-binding family A member 1 OS=Homo sapie	51994000	5216700	269780000	6401300	59185000	868940000	965300	60021000	63573000	68642000	22385000	74135000	175810000	50398000	57766000	5992400	35635000	14112000	16803000	7509900	8068700	33157000	4063200	46149000	2963200	50730000	31320000	25363000	7715800	64681000	82762000	9887800	94287000	22457000	29544000	69994000	259020000	47806000	76775000	536300	28613000	203790000	10823000	1424700	4583400
Q99767-2;Q99767	2	Amyloid beta A4 precursor protein-binding family A member 2	APBA2	sp|Q99767-2|APBA2-2_HUMAN Isoform of Q99767, Isoform 2 of Amyloid-beta A4 precursor protein-binding family A member 2 OS=Homo sapiens OX=9606 GN=APBA2 PE=1 SV=3;sp|Q99767|APBA2_HUMAN Amyloid-beta A4 precursor protein-binding family A member 2 OS=Homo sapie	0	0	0	2940600	0	0	0	0	0	0	0	6302200	0	23477000	189960000	0	0	0	0	0	0	0	0	0	0	3900400	0	127150000	0	0	0	0	56063000	7272800	8476400	0	105040000	0	0	0	15162000	39362000	38834000	0	0
A0A075B7G8;O00213-4;O00213-6;O00213-5;O00213;A0A087X0V7;A0A087WYH9;J3KPL8;O00213-3;O00213-2;V9GYR7	13	Amyloid beta A4 precursor protein-binding family B member 1	APBB1	tr|A0A075B7G8|A0A075B7G8_HUMAN Isoform of O00213, Amyloid-beta A4 precursor protein-binding family B member 1 OS=Homo sapiens OX=9606 GN=APBB1 PE=1 SV=7;sp|O00213-4|APBB1-4_HUMAN Isoform of O00213, Isoform 4 of Amyloid-beta A4 precursor protein-binding fam	30456000	82755000	0	0	87998	22507000	2522200	25187000	91678000	11556000	26722000	26307000	43851000	45673000	72301000	103350000	7934400	4418100	151860000	695850	3254600	24191000	7278900	11929000	15349000	4939600	169210000	14792000	0	90118000	128980000	2101300	7808200	7698000	2654200	105130000	35637000	17131000	13390000	1152200	6305400	37915000	17734000	20162000	89379000
P25054-2;P25054-3;P25054	5	Adenomatous polyposis coli protein	APC	sp|P25054-2|APC-2_HUMAN Isoform of P25054, Isoform 2 of Adenomatous polyposis coli protein OS=Homo sapiens OX=9606 GN=APC PE=1 SV=2;sp|P25054-3|APC-3_HUMAN Isoform of P25054, Isoform 1B of Adenomatous polyposis coli protein OS=Homo sapiens OX=9606 GN=APC P	251960000	596690000	100180000	139280000	23950000	13727000	50597000	225990000	11283000	336170000	502610000	136810000	161290000	7054400000	337270000	808030000	36007000	17180000	965070000	516970000	27419000	56928000	146280000	186010000	190590000	866760000	419180000	345180000	32919000	270220000	17785000000	27623000	1105300000	87712000	816300000	144700000	63183000	673010000	103100000	67767000	282100000	431590000	656220000	189210000	195360000
P02743	1	Serum amyloid P-component;Serum amyloid P-component(1-203)	APCS	sp|P02743|SAMP_HUMAN Serum amyloid P-component OS=Homo sapiens OX=9606 GN=APCS PE=1 SV=2	44550000	781580000	71179000	607590000	611640000	67919000	94275000	472560000	0	1480000000	1195300000	1167500000	1059800000	967050000	361740000	1641300000	365250000	365220000	2819200000	689100000	252120000	1897200000	309990000	93114000	565930000	110400000	143920000	2049800000	79546000	1121900000	1499500000	328240000	4414000000	1498100000	0	148550000	177730000	635780000	617160000	508780000	283130000	1631200000	188040000	33257000	82446000
C9JIF9;P13798;H7C1U0;H7C393	7	Acylamino-acid-releasing enzyme	APEH	tr|C9JIF9|C9JIF9_HUMAN Isoform of P13798, Acylamino-acid-releasing enzyme OS=Homo sapiens OX=9606 GN=APEH PE=1 SV=1;sp|P13798|ACPH_HUMAN Acylamino-acid-releasing enzyme OS=Homo sapiens OX=9606 GN=APEH PE=1 SV=4;tr|H7C1U0|H7C1U0_HUMAN Isoform of P13798, Acy	154350000000	96416000000	19933000000	15710000000	17595000000	11566000000	18060000000	72871000000	39512000000	45907000000	10386000000	72663000000	34590000000	119370000000	87123000000	14812000000	4036800000	4920900000	179790000000	18201000000	1847500000	55646000000	30437000000	20896000000	14229000000	30060000000	10258000000	112770000000	6572700000	84275000000	134390000000	3794400000	54680000000	20684000000	7821800000	13426000000	14642000000	30759000000	19615000000	7633300000	43377000000	87544000000	8034200000	10189000000	12838000000
P27695;G3V3M6;G3V3C7;G3V5Q1;A0A0C4DGK8;G3V5M0;G3V359	9	DNA-(apurinic or apyrimidinic site) lyase;DNA-(apurinic or apyrimidinic site) lyase, mitochondrial	APEX1	sp|P27695|APEX1_HUMAN DNA-(apurinic or apyrimidinic site) lyase OS=Homo sapiens OX=9606 GN=APEX1 PE=1 SV=2;tr|G3V3M6|G3V3M6_HUMAN Isoform of P27695, DNA-(apurinic or apyrimidinic site) lyase (Fragment) OS=Homo sapiens OX=9606 GN=APEX1 PE=1 SV=1;tr|G3V3C7|G	13939000	2690000	11450000	49796000	20592000	5165800	718510	13509000	902300	28475000	3466700	31368000	21193000	0	16010000	3768300	6772200	2797300	38575000	2575400	7979400	8416100	1096200	46009000	15287000	31794000	13572000	2247800	0	19112000	37609000	0	213180000	0	4025100	19421000	0	195870000	0	0	27289000	0	5984700	4847000	12385000
Q9BZZ5-2;G3V1C3;Q9BZZ5;Q9BZZ5-5;Q9BZZ5-6;Q9BZZ5-1	8	Apoptosis inhibitor 5	API5	sp|Q9BZZ5-2|API5-2_HUMAN Isoform of Q9BZZ5, Isoform 2 of Apoptosis inhibitor 5 OS=Homo sapiens OX=9606 GN=API5 PE=1 SV=3;tr|G3V1C3|G3V1C3_HUMAN Isoform of Q9BZZ5, Apoptosis inhibitor 5 OS=Homo sapiens OX=9606 GN=API5 PE=1 SV=1;sp|Q9BZZ5|API5_HUMAN Apoptosi	21813000	75027000	4866100	109910000	1068900000	572710000	1405500	657410000	12356000	17390000	540410000	152630000	28133000	856950000	123810000	1303000000	53493000	686550000	196290000	852560000	0	25363000	65789000	432910000	80060000	17169000	75267000	1235500000	364070000	1784900000	8108500000	143600000	85796000	231250000	670450000	82628000	8365200	9710700	2591800000	129970000	659270000	0	94934000	75608000	166340000
Q96GX9;S4R3D6	2	Methylthioribulose-1-phosphate dehydratase	APIP	sp|Q96GX9|MTNB_HUMAN Methylthioribulose-1-phosphate dehydratase OS=Homo sapiens OX=9606 GN=APIP PE=1 SV=1;tr|S4R3D6|S4R3D6_HUMAN Isoform of Q96GX9, Methylthioribulose-1-phosphate dehydratase OS=Homo sapiens OX=9606 GN=APIP PE=1 SV=1	18731000	333320000	45068000	272630000	5259400	30402000	135340000	75904000	0	65315000	43777000	322100000	5984000	650890000	46570000	256460000	5312300	0	56818000	12856000	13037000	448390000	259080000	107650000	16103000	152200000	313500000	241260000	11737000	105210000	48947000	7218900	89615000	53480000	7570000	19439000	62211000	77011000	72985000	0	31244000	13890000	28541000	87974000	16499000
P35414	1	Apelin receptor	APLNR	sp|P35414|APJ_HUMAN Apelin receptor OS=Homo sapiens OX=9606 GN=APLNR PE=1 SV=1	23971000	41701000	0	23137000	5769800	0	4507900	7096700	0	1523900	1640500	75550000	2701300	10722000	0	677360	0	0	9288100	0	0	998230	0	0	0	7938100	808200	6702400	0	8531600	6326700	0	0	5839100	0	481090	19678000	34219000	1925900	4378000	5986500	11816000	10881000	1768900	0
P51693-2	1	Amyloid-like protein 1;C30	APLP1	sp|P51693-2|APLP1-2_HUMAN Isoform of P51693, Isoform 2 of Amyloid-like protein 1 OS=Homo sapiens OX=9606 GN=APLP1 PE=1 SV=3	3110500000	3247000000	567320000	529040000	2075400000	1112700000	1630800000	3342400000	1476700000	871160000	1584800000	5455400000	1884500000	10482000000	5155000000	957150000	1165600000	406840000	4321100000	1821500000	126080000	3342200000	2404700000	2202300000	791750000	1812800000	607730000	2816400000	321310000	8183900000	6231000000	383820000	4267200000	1123200000	193390000	558960000	899180000	2163000000	1279700000	373000000	1288900000	4127700000	427140000	898760000	809150000
Q06481;Q06481-3;Q06481-6;Q06481-2;Q06481-4;Q06481-5	9	Amyloid-like protein 2	APLP2	sp|Q06481|APLP2_HUMAN Amyloid-like protein 2 OS=Homo sapiens OX=9606 GN=APLP2 PE=1 SV=2;sp|Q06481-3|APLP2-3_HUMAN Isoform of Q06481, Isoform 3 of Amyloid-like protein 2 OS=Homo sapiens OX=9606 GN=APLP2 PE=1 SV=2;sp|Q06481-6|APLP2-6_HUMAN Isoform of Q06481,	48601000	248350000	59696000	5058200	11167000	4459500	513860	226700000	25818000	380760000	19622000	205700000	142030000	142210000	94718000	30014000	44230000	272940	498580000	32344000	6490600	226570000	36680000	39655000	103840000	587390000	25385000	136410000	0	311820000	469090000	0	95755000	20462000	13593000	6335000	58961000	48248000	58855000	0	123560000	235930000	25157000	7436600	9106600
Q9HDC9;H0Y512;Q9HDC9-2	3	Adipocyte plasma membrane-associated protein	APMAP	sp|Q9HDC9|APMAP_HUMAN Adipocyte plasma membrane-associated protein OS=Homo sapiens OX=9606 GN=APMAP PE=1 SV=2;tr|H0Y512|H0Y512_HUMAN Isoform of Q9HDC9, Adipocyte plasma membrane-associated protein (Fragment) OS=Homo sapiens OX=9606 GN=APMAP PE=1 SV=1;sp|Q9	141670000	331190000	41999000	469210000	729080000	20174000	23264000	472140000	40577000	40224000	416720000	162670000	694570000	853310000	373010000	758660000	788060000	140240000	4334600000	29813000	74291000	47404000	377400000	503870000	235990000	28060000	466600000	260750000	261820000	1984200000	726910000	107040000	1777300000	875810000	481840000	1393200000	491420000	403740000	988800000	188030000	1054600000	1458200000	824510000	249930000	201940000
P02647;F8W696	2	Apolipoprotein A-I;Proapolipoprotein A-I;Truncated apolipoprotein A-I	APOA1	sp|P02647|APOA1_HUMAN Apolipoprotein A-I OS=Homo sapiens OX=9606 GN=APOA1 PE=1 SV=1;tr|F8W696|F8W696_HUMAN Isoform of P02647, Apolipoprotein A-I OS=Homo sapiens OX=9606 GN=APOA1 PE=1 SV=1	1796900000	6068200000	544250000	5909700000	969490000	36627000	307730000	5868500000	38409000	332350000	3491200000	5606700000	1410800000	4050200000	2120300000	619560000	50896000	77129000	8964600000	1973300000	42489000	348600000	236650000	83511000	388190000	150290000	1636800000	866800000	37939000	3180200000	11680000000	123780000	405090000	9177000000	342080000	289770000	755270000	4787000000	426920000	516930000	322840000	688200000	43175000	987720000	2135900000
Q8NCW5;Q8NCW5-2;Q5T3I4	3	NAD(P)H-hydrate epimerase	APOA1BP	sp|Q8NCW5|NNRE_HUMAN NAD(P)H-hydrate epimerase OS=Homo sapiens OX=9606 GN=NAXE PE=1 SV=2;sp|Q8NCW5-2|NNRE-2_HUMAN Isoform of Q8NCW5, Isoform 2 of NAD(P)H-hydrate epimerase OS=Homo sapiens OX=9606 GN=NAXE PE=1 SV=2;tr|Q5T3I4|Q5T3I4_HUMAN Isoform of Q8NCW5,	415020000	231240000	13474000	67077000	65111000	646530000	11450000	62313000	3351700	50990000	95465000	184820000	184800000	161750000	95332000	389760000	6065600	2877000	120840000	120160000	5201800	50675000	68230000	44613000	101810000	23570000	68297000	231790000	51992000	354850000	227280000	21482000	223760000	73478000	66963000	30559000	28878000	112340000	167770000	9051100	31093000	109500000	64992000	29023000	41700000
V9GYG9;V9GYM3;P02652;V9GYE3;V9GYC1;V9GYS1	6	Apolipoprotein A-II;Proapolipoprotein A-II;Truncated apolipoprotein A-II	APOA2	tr|V9GYG9|V9GYG9_HUMAN Isoform of P02652, Apolipoprotein A-II (Fragment) OS=Homo sapiens OX=9606 GN=APOA2 PE=1 SV=1;tr|V9GYM3|V9GYM3_HUMAN Isoform of P02652, Apolipoprotein A-II OS=Homo sapiens OX=9606 GN=APOA2 PE=1 SV=1;sp|P02652|APOA2_HUMAN Apolipoprotei	5931300	134010000	0	85857000	8568100	0	0	153340000	1672700	0	18948000	369500000	39530000	858180000	16819000	149510000	56048000	8353200	251530000	35164000	6917700	54382000	20634000	6377700	15646000	15472000	12410000	0	5511700	44833000	573200000	5181000	77827000	2254300000	6311700	53215000	122700000	371870000	130960000	57349000	0	67650000	22971000	7930700	36042000
P06727	1	Apolipoprotein A-IV	APOA4	sp|P06727|APOA4_HUMAN Apolipoprotein A-IV OS=Homo sapiens OX=9606 GN=APOA4 PE=1 SV=3	34646000	119370000	27042000	48677000	39750000	4162700	30742000	152970000	2441800	69399000	192290000	249630000	51269000	453910000	350530000	118760000	59707000	1566900	4108800000	26643000	462020000	42438000	46021000	14528000	29812000	249980000	151460000	1217200000	89083000	454430000	675230000	0	1752400000	2081100000	42820000	360380000	429620000	5263100000	57656000	30085000	312000000	688200000	126190000	239950000	27762000
P04114	2	Apolipoprotein B-100;Apolipoprotein B-48	APOB	sp|P04114|APOB_HUMAN Apolipoprotein B-100 OS=Homo sapiens OX=9606 GN=APOB PE=1 SV=2	32624000000	31601000000	39910000000	36565000000	8969100000	3119400000	19169000000	26370000000	22093000000	36166000000	4329500000	44018000000	30633000000	108220000000	42940000000	18120000000	5042500000	6813700000	226550000000	16472000000	4320000000	30720000000	28855000000	13397000000	9785300000	9194200000	4614800000	13853000000	5091000000	60243000000	98189000000	3466500000	45765000000	35411000000	6233200000	16201000000	7402900000	30158000000	26266000000	16532000000	10729000000	48134000000	5453000000	9775600000	5035900000
Q9HC16	1	DNA dC->dU-editing enzyme APOBEC-3G	APOBEC3G	sp|Q9HC16|ABC3G_HUMAN DNA dC->dU-editing enzyme APOBEC-3G OS=Homo sapiens OX=9606 GN=APOBEC3G PE=1 SV=1	78110000	87917000	2309700	56082000	4795000	2286100	145870000	89252000	1759400	5872000	140360000	345840000	188440000	176590000	12750000	158810000	27286000	7965300	652460000	4849700	11302000	245580000	13108000	2922300	0	10913000	15385000	218450000	0	146730000	387360000	19330000	250490000	45986000	34501000	260250000	28749000	509580000	22363000	0	35452000	520640000	112010000	316810000	386860000
Q6P163;A0A024R0T9;K7ER74;P02655;V9GYJ8	5	Apolipoprotein C-II;Proapolipoprotein C-II	APOC2;APOC4-APOC2	tr|Q6P163|Q6P163_HUMAN Isoform of P02655, APOC2 protein OS=Homo sapiens OX=9606 GN=APOC2 PE=1 SV=1;tr|A0A024R0T9|A0A024R0T9_HUMAN Isoform of K7ER74, Apolipoprotein C-II isoform 1 OS=Homo sapiens OX=9606 GN=APOC4-APOC2 PE=1 SV=1;tr|K7ER74|K7ER74_HUMAN APOC4	16368000	46463000	0	44485000	0	1022300	4639600	0	9828800	0	394200	0	12186000	5699400	0	18984000	345840	580580	183460000	379590	0	0	0	0	0	0	0	41838000	220020	0	0	0	2687500	57956000	2453200	2155700	6168900	3570000	7099200	2729700	178180000	0	0	0	1915900
B0YIW2;P02656	2	Apolipoprotein C-III	APOC3	tr|B0YIW2|B0YIW2_HUMAN Isoform of P02656, Apolipoprotein C-III OS=Homo sapiens OX=9606 GN=APOC3 PE=1 SV=1;sp|P02656|APOC3_HUMAN Apolipoprotein C-III OS=Homo sapiens OX=9606 GN=APOC3 PE=1 SV=1	9227300	15035000	4489900	17986000	5995300	5224500	498170	36318000	636340	21393000	10256000	55717000	16176000	224200000	160920000	14666000	1874800	959540	341640000	36755000	1465600	27393000	0	2673800	11631000	4461900	291130	20882000	744930	271190000	58050000	0	39430000	355190000	9361600	410100	59659000	200230000	26560000	13296000	8692600	39435000	1228300	45134000	3793500
C9JF17;P05090	4	Apolipoprotein D	APOD	tr|C9JF17|C9JF17_HUMAN Isoform of P05090, Apolipoprotein D (Fragment) OS=Homo sapiens OX=9606 GN=APOD PE=1 SV=1;sp|P05090|APOD_HUMAN Apolipoprotein D OS=Homo sapiens OX=9606 GN=APOD PE=1 SV=1	6506300000	4290100000	718750000	3315800000	1848600000	316540000	1038800000	3184900000	48165000	1428400000	1648200000	3430400000	2945900000	14181000000	4413600000	1457500000	220780000	338490000	8593100000	2757800000	437340000	2523200000	2401800000	988730000	520190000	1623300000	2529500000	2565300000	395900000	19006000000	23360000000	976350000	5352900000	3101000000	162230000	813680000	668230000	635230000	1280100000	3312500000	2505300000	5254700000	151130000	1180900000	1214000000
P02649;H0Y7L5;E9PEV4;E7ERP7	4	Apolipoprotein E	APOE	sp|P02649|APOE_HUMAN Apolipoprotein E OS=Homo sapiens OX=9606 GN=APOE PE=1 SV=1;tr|H0Y7L5|H0Y7L5_HUMAN Isoform of P02649, Apolipoprotein E (Fragment) OS=Homo sapiens OX=9606 GN=APOE PE=1 SV=2;tr|E9PEV4|E9PEV4_HUMAN Isoform of P02649, Apolipoprotein E (Frag	6379800000	29328000000	2452300000	1324900000	3732600000	44813000	409960000	9826400000	79739000	2155600000	3961900000	9346700000	1657400000	11901000000	6515400000	729510000	671890000	489170000	33137000000	5034600000	279090000	3714300000	320270000	670930000	411210000	1897400000	5711600000	7498800000	171660000	4001900000	35208000000	423560000	2925900000	2200100000	175530000	414630000	407010000	615490000	315870000	7968200000	1994500000	22161000000	278780000	188030000	7097400000
P02749;J3QRN2	4	Beta-2-glycoprotein 1	APOH	sp|P02749|APOH_HUMAN Beta-2-glycoprotein 1 OS=Homo sapiens OX=9606 GN=APOH PE=1 SV=3;tr|J3QRN2|J3QRN2_HUMAN Isoform of P02749, Beta-2-glycoprotein 1 (Fragment) OS=Homo sapiens OX=9606 GN=APOH PE=1 SV=1	0	1890900	0	0	0	1188000	0	0	0	0	0	74742000	2334700	52855000	0	0	0	0	37517000	0	0	4090800	4316600	0	40065000	0	0	98724000	0	8434800	14369000	0	24814000	242330000	1674700	16361000	49250000	132310000	0	6890700	0	6176000	10117000	4266000	2129900
O14791-3;O14791;O14791-2	4	Apolipoprotein L1	APOL1	sp|O14791-3|APOL1-3_HUMAN Isoform of O14791, Isoform 3 of Apolipoprotein L1 OS=Homo sapiens OX=9606 GN=APOL1 PE=1 SV=5;sp|O14791|APOL1_HUMAN Apolipoprotein L1 OS=Homo sapiens OX=9606 GN=APOL1 PE=1 SV=5;sp|O14791-2|APOL1-2_HUMAN Isoform of O14791, Isoform 2	5787100	169850000	39504000	82223000	10664000	14849000	20528000	52255000	0	472060000	26672000	283590000	29396000	71215000	31669000	59101000	88808000	140380	371300000	42131000	37869000	45386000	34782000	25880000	17921000	9118900	136560000	68590000	10055000	112360000	32317000	2672400	264670000	123360000	11155000	26574000	754250000	176590000	68287000	12180000	0	133460000	8535300	7973300	8770000
J3KQL8;Q9BQE5	4	Apolipoprotein L2	APOL2	tr|J3KQL8|J3KQL8_HUMAN Isoform of Q9BQE5, Apolipoprotein L2 OS=Homo sapiens OX=9606 GN=APOL2 PE=1 SV=2;sp|Q9BQE5|APOL2_HUMAN Apolipoprotein L2 OS=Homo sapiens OX=9606 GN=APOL2 PE=1 SV=1	0	7530200	2298400	24251000	17723000	1857700	0	5353100	0	20555000	35645000	0	184960000	93773000	0	47950000	13800000	2931400	24851000	0	5516600	0	0	6627900	1249600	21537000	55641000	0	4935400	12933000	217730000	6353100	32117000	34735000	9663200	53441000	258510000	607780000	58884000	0	6824400	0	58248000	0	82356000
G3V1B6;Q9BUR5-2;H7C1U8;Q9BUR5	4	Apolipoprotein O	APOO	tr|G3V1B6|G3V1B6_HUMAN Isoform of Q9BUR5, MICOS complex subunit MIC26 OS=Homo sapiens OX=9606 GN=APOO PE=1 SV=1;sp|Q9BUR5-2|MIC26-2_HUMAN Isoform of Q9BUR5, Isoform 2 of MICOS complex subunit MIC26 OS=Homo sapiens OX=9606 GN=APOO PE=1 SV=1;tr|H7C1U8|H7C1U8	9370300	54207000	0	55209000	1250500	1421300	6467200	8370600	1163700	3703300	1919200	51290000	0	112600000	0	3320000	5575700	18976000	69929000	0	3320200	52908000	4650800	4819700	12037000	839000	1822200	21265000	3259600	53144000	62504000	1622600	24025000	0	0	0	12442000	107090000	8821500	18900000	27679000	55904000	0	0	7609600
P05067-8;P05067;P05067-11;P05067-7;P05067-9;E9PG40;P05067-4;P05067-6;A0A0A0MRG2;P05067-3;P05067-5;P05067-10;H7C0V9	15	Amyloid beta A4 protein;N-APP;Soluble APP-alpha;Soluble APP-beta;C99;Beta-amyloid protein 42;Beta-amyloid protein 40;C83;P3(42);P3(40);C80;Gamma-secretase C-terminal fragment 59;Gamma-secretase C-terminal fragment 57;Gamma-secretase C-terminal fragment 50;C31	APP	sp|P05067-8|A4-8_HUMAN Isoform of P05067, Isoform APP751 of Amyloid-beta precursor protein OS=Homo sapiens OX=9606 GN=APP PE=1 SV=3;sp|P05067|A4_HUMAN Amyloid-beta precursor protein OS=Homo sapiens OX=9606 GN=APP PE=1 SV=3;sp|P05067-11|A4-11_HUMAN Isoform	6003900000	8448200000	2381500000	498610000	1658800000	1126100000	1763000000	10007000000	2962900000	6710400000	1512100000	8675100000	4623100000	12152000000	9211100000	1456500000	1223700000	319800000	22460000000	3817800000	523480000	7101000000	3528300000	3333700000	1603300000	5516000000	1229600000	6142100000	330940000	12955000000	19237000000	476910000	7834600000	2556800000	248290000	1884700000	1710500000	3644500000	3006900000	276520000	2332600000	5660000000	1329600000	1122600000	615420000
Q9UKG1	3	DCC-interacting protein 13-alpha	APPL1	sp|Q9UKG1|DP13A_HUMAN DCC-interacting protein 13-alpha OS=Homo sapiens OX=9606 GN=APPL1 PE=1 SV=1	331650000	375040000	9870800	1851200000	2011600000	1324700000	508960000	330610000	400160000	698600000	2324200000	410900000	7309800000	5325300000	408830000	3413900000	3020300000	1321800000	1819500000	84704000	237820000	1194700000	1560400000	1899800000	1714100000	1568100000	1801800000	56404000	502470000	1994900000	2074800000	339730000	2704500000	1839900000	1217400000	1118400000	2779800000	8028400000	4891300000	304930000	1577800000	2653000000	1968800000	942200000	3116500000
Q8NEU8-3;Q8NEU8;Q8NEU8-2	7	DCC-interacting protein 13-beta	APPL2	sp|Q8NEU8-3|DP13B-3_HUMAN Isoform of Q8NEU8, Isoform 3 of DCC-interacting protein 13-beta OS=Homo sapiens OX=9606 GN=APPL2 PE=1 SV=3;sp|Q8NEU8|DP13B_HUMAN DCC-interacting protein 13-beta OS=Homo sapiens OX=9606 GN=APPL2 PE=1 SV=3;sp|Q8NEU8-2|DP13B-2_HUMAN	95346000	225990000	20556000	428000000	169920000	84909000	72049000	77464000	891480	82190000	240510000	155420000	918650000	145950000	53142000	732330000	284910000	128060000	1219400000	14653000	48280000	89370000	288090000	76036000	611330000	325540000	392350000	59886000	227070000	122280000	277600000	61142000	173950000	183450000	244640000	140390000	1070600000	861460000	493970000	280620000	163720000	330170000	106600000	267860000	1777000000
P07741;H3BQB1;P07741-2;H3BQF1;H3BQZ9	6	Adenine phosphoribosyltransferase	APRT	sp|P07741|APT_HUMAN Adenine phosphoribosyltransferase OS=Homo sapiens OX=9606 GN=APRT PE=1 SV=2;tr|H3BQB1|H3BQB1_HUMAN Isoform of P07741, Adenine phosphoribosyltransferase (Fragment) OS=Homo sapiens OX=9606 GN=APRT PE=1 SV=1;sp|P07741-2|APT-2_HUMAN Isoform	347840000	448030000	50407000	1193000000	168340000	129860000	147590000	348470000	0	312020000	177980000	340140000	528930000	2324100000	1002500000	928630000	108010000	46066000	911970000	299820000	77995000	25433000	513030000	263720000	718360000	175150000	193600000	644210000	168950000	5125400000	2287600000	49554000	1181100000	421260000	411560000	118760000	291990000	1296800000	1080300000	259330000	313840000	900080000	137230000	466830000	189960000
K7N7A8;P29972;A0A494C1U4;A0A494C115;P29972-4;P29972-2;P29972-3	7	Aquaporin-1	AQP1	tr|K7N7A8|K7N7A8_HUMAN Uncharacterized protein (Fragment) OS=Homo sapiens OX=9606 PE=3 SV=2;sp|P29972|AQP1_HUMAN Aquaporin-1 OS=Homo sapiens OX=9606 GN=AQP1 PE=1 SV=3;tr|A0A494C1U4|A0A494C1U4_HUMAN Isoform of P29972, Aquaporin-1 (Fragment) OS=Homo sapiens	204520000	0	0	98815000	4800200	0	67807000	0	0	0	38859000	3590000	0	54562000	32385000	0	20823000	0	8123700	0	0	0	0	43889000	0	0	0	0	0	494530000	0	0	0	10561000	68797000	0	0	0	0	14696000	91879000	320670000	0	15538000	0
P55087;P55087-2	2	Aquaporin-4	AQP4	sp|P55087|AQP4_HUMAN Aquaporin-4 OS=Homo sapiens OX=9606 GN=AQP4 PE=1 SV=2;sp|P55087-2|AQP4-2_HUMAN Isoform of P55087, Isoform 1 of Aquaporin-4 OS=Homo sapiens OX=9606 GN=AQP4 PE=1 SV=2	467190000	644490000	8430100	78310000	92240000	4325100	68276000	136270000	0	22789000	50039000	423260000	126130000	358370000	239560000	65317000	67195000	0	303400000	150010000	514280	189970000	55355000	55344000	4441900	81869000	26737000	0	263320000	1486600000	1286400000	4436700	115920000	1052600000	120420000	107110000	183360000	386010000	287960000	234260000	445300000	1309400000	5488200	19405000	56218000
O60306;H0YH15	2	Intron-binding protein aquarius	AQR	sp|O60306|AQR_HUMAN RNA helicase aquarius OS=Homo sapiens OX=9606 GN=AQR PE=1 SV=4;tr|H0YH15|H0YH15_HUMAN Isoform of O60306, Aquarius homolog (Mouse), isoform CRA_a OS=Homo sapiens OX=9606 GN=AQR PE=1 SV=1	43759000	1618800	4395700	12447000	4330500	29099000	4421600	59743000	6654400	840750000	13445000	158140000	4187100	81741000	51653000	17667000	12206000	2413000	82909000	25912000	19670000	33192000	14831000	69269000	29708000	3911500	34881000	203350000	199990	78599000	11929000	0	164170000	21892000	1764100	19483000	56123000	8905500	188670000	8160900	100870000	243180000	19210000	19110000	23875000
Q96P48-3;Q96P48;E7EU13;Q96P48-7;Q96P48-4;Q96P48-2;Q96P48-1	13	Arf-GAP with Rho-GAP domain, ANK repeat and PH domain-containing protein 1	ARAP1	sp|Q96P48-3|ARAP1-3_HUMAN Isoform of Q96P48, Isoform 3 of Arf-GAP with Rho-GAP domain, ANK repeat and PH domain-containing protein 1 OS=Homo sapiens OX=9606 GN=ARAP1 PE=1 SV=3;sp|Q96P48|ARAP1_HUMAN Arf-GAP with Rho-GAP domain, ANK repeat and PH domain-cont	32272000	22683000	2247700	15027000	60159000	241460000	4131600	66625000	0	45316000	2349700	4844300	201110000	75144000	187160000	71830000	58715000	4218600	140020000	21292000	26007000	0	11343000	4575400	2401500	7156900	22499000	103890000	0	7681700	292220000	652460	251300000	52147000	9438100	63788000	68020000	5994800000	162850000	17694000	169300000	188740000	67818000	4039000	1381600
P48444;B0YIW6;P48444-2	5	Coatomer subunit delta	ARCN1	sp|P48444|COPD_HUMAN Coatomer subunit delta OS=Homo sapiens OX=9606 GN=ARCN1 PE=1 SV=1;tr|B0YIW6|B0YIW6_HUMAN Isoform of P48444, Archain 1, isoform CRA_a OS=Homo sapiens OX=9606 GN=ARCN1 PE=1 SV=1;sp|P48444-2|COPD-2_HUMAN Isoform of P48444, Isoform 2 of Co	22023000	23001000	25956000	153520000	78833000	164760000	1994500	39058000	3602200	15198000	61421000	106740000	104270000	407110000	63945000	153160000	383730000	24773000	924180000	35631000	114950000	50099000	10542000	18122000	199180000	66441000	36215000	70697000	14096000	175570000	1444800000	7749800	371320000	125810000	107020000	21902000	433460000	490630000	129930000	39609000	131900000	387050000	115370000	101420000	42293000
O15033-2;O15033;G3V506;G3V2B5	7	Apoptosis-resistant E3 ubiquitin protein ligase 1	AREL1	sp|O15033-2|AREL1-2_HUMAN Isoform of O15033, Isoform 2 of Apoptosis-resistant E3 ubiquitin protein ligase 1 OS=Homo sapiens OX=9606 GN=AREL1 PE=1 SV=3;sp|O15033|AREL1_HUMAN Apoptosis-resistant E3 ubiquitin protein ligase 1 OS=Homo sapiens OX=9606 GN=AREL1	114030000	23873000	0	8905900	9754500	523210	92013	58654000	534480	17897000	2879900	184530000	6379300	98224000	249050000	24516000	960940	1302800	398130000	1867700	1778500	2133900	10127000	41880000	4005500	166070000	10424000	41640000	2312500	167370000	152100000	1353400	111260000	27485000	7002400	226840000	23491000	44134000	43749000	473250	39530000	180100000	20344000	0	0
P61204;P84077	3	ADP-ribosylation factor 3;ADP-ribosylation factor 1	ARF3;ARF1	sp|P61204|ARF3_HUMAN ADP-ribosylation factor 3 OS=Homo sapiens OX=9606 GN=ARF3 PE=1 SV=2;sp|P84077|ARF1_HUMAN ADP-ribosylation factor 1 OS=Homo sapiens OX=9606 GN=ARF1 PE=1 SV=2	783580000	1008300000	65992000	189340000	173490000	19497000	34997000	282030000	0	334770000	362690000	313900000	458960000	883570000	549600000	246780000	29007000	17748000	816810000	139830000	25542000	8165600	107990000	81082000	468350000	102440000	115420000	674180000	28157000	984730000	2233100000	42226000	980600000	214640000	438420000	44793000	121360000	1996600000	486800000	29452000	207290000	866680000	166630000	1989800000	263450000
P18085;C9JPM4	3	ADP-ribosylation factor 4	ARF4	sp|P18085|ARF4_HUMAN ADP-ribosylation factor 4 OS=Homo sapiens OX=9606 GN=ARF4 PE=1 SV=3;tr|C9JPM4|C9JPM4_HUMAN Isoform of P18085, ADP-ribosylation factor 4 (Fragment) OS=Homo sapiens OX=9606 GN=ARF4 PE=1 SV=1	38288000	9935900	0	17794000	6212400	20217000	5736300	2150800	0	108260000	44173000	53535000	183290000	161320000	57348000	77604000	25190000	3805300	45597000	2300900	11808000	30805000	31083000	21302000	971120000	71199000	5928600	160620000	4300800	144920000	128480000	32416000	187860000	172910000	631520000	54665000	104800000	390630000	77676000	19223000	75862000	393790000	80600000	1040500000	13903000
P84085;C9J1Z8	2	ADP-ribosylation factor 5	ARF5	sp|P84085|ARF5_HUMAN ADP-ribosylation factor 5 OS=Homo sapiens OX=9606 GN=ARF5 PE=1 SV=2;tr|C9J1Z8|C9J1Z8_HUMAN Isoform of P84085, ADP-ribosylation factor 5 (Fragment) OS=Homo sapiens OX=9606 GN=ARF5 PE=1 SV=1	44632000	110350000	3101400	17557000	1197400000	387780000	11186000	60828000	0	17958000	41981000	41671000	136730000	77522000	110010000	42799000	6408800	4869800	129120000	15502000	4662400	2606700	23485000	22711000	36421000	20358000	27766000	48781000	6661600	117430000	538740000	7351500	131990000	45823000	602660000	0	38740000	187690000	273230000	1976500	68797000	126940000	13275000	1044100000	43466000
P62330	1	ADP-ribosylation factor 6	ARF6	sp|P62330|ARF6_HUMAN ADP-ribosylation factor 6 OS=Homo sapiens OX=9606 GN=ARF6 PE=1 SV=2	0	48913000	2367900	2324600	15875000	1819700	1879600	1372000	0	26514000	14598000	11633000	73210000	1423800000	24066000	30912000	1123000	559770	1406900	14445000	3167600	0	3680800	8074100	72339000	9402900	2574400	181180000	811830	79149000	274110000	666060	95254000	18768000	67047000	17521000	10158000	318850000	60347000	2812400	67089000	128830000	5561500	126100000	10173000
Q8N6T3;Q8N6T3-2;F8VWH9;Q8N6T3-5;F8W1U7;Q8N6T3-3;E5RHT6;E5RHC5	13	ADP-ribosylation factor GTPase-activating protein 1	ARFGAP1	sp|Q8N6T3|ARFG1_HUMAN ADP-ribosylation factor GTPase-activating protein 1 OS=Homo sapiens OX=9606 GN=ARFGAP1 PE=1 SV=2;sp|Q8N6T3-2|ARFG1-2_HUMAN Isoform of Q8N6T3, Isoform 2 of ADP-ribosylation factor GTPase-activating protein 1 OS=Homo sapiens OX=9606 GN=	45838000	57906000	2886300	1675300	3139300	5989000	2703600	4180900	4796700	30982000	4585400	34675000	762660000	38447000	128860000	90800000	187800000	71050000	519830000	5253700	2663600	1221900	49348000	50920000	20150000	99204000	22366000	12890000	7981900	124810000	541270000	0	795310000	25938000	14829000	152850000	68274000	1929300000	1765000000	27867000	477140000	246650000	154820000	378800000	2262100
Q8N6H7;G5E9L0;A0A0D9SF70;E9PIY6;Q8N6H7-2;E9PQP3;E9PN48;E9PJT7;E9PK28	20	ADP-ribosylation factor GTPase-activating protein 2	ARFGAP2	sp|Q8N6H7|ARFG2_HUMAN ADP-ribosylation factor GTPase-activating protein 2 OS=Homo sapiens OX=9606 GN=ARFGAP2 PE=1 SV=1;tr|G5E9L0|G5E9L0_HUMAN Isoform of Q8N6H7, ADP-ribosylation factor GTPase-activating protein 2 OS=Homo sapiens OX=9606 GN=ARFGAP2 PE=1 SV=	104860000	137240000	0	25889000	5925400	56569000	65650000	100970000	1217900	32748000	172840000	109470000	47400000	161610000	20296000	4720900	158480000	36650000	1179000000	8907200	566920	66490000	79881000	90666000	18250000	130010000	37060000	44494000	21150000	56805000	46599000000	3855200	84468000	48710000	80395000	84710000	56476000	263260000	178960000	7151700	43254000	82715000	16553000	41168000	31497000
Q9Y6D6;E5RIF2;E5RHL7	5	Brefeldin A-inhibited guanine nucleotide-exchange protein 1	ARFGEF1	sp|Q9Y6D6|BIG1_HUMAN Brefeldin A-inhibited guanine nucleotide-exchange protein 1 OS=Homo sapiens OX=9606 GN=ARFGEF1 PE=1 SV=2;tr|E5RIF2|E5RIF2_HUMAN Isoform of Q9Y6D6, Brefeldin A-inhibited guanine nucleotide-exchange protein 1 (Fragment) OS=Homo sapiens O	128540000	425250000	15015000	148220000	84040000	1946100000	26875000	91078000	12526000	417510000	36263000	209370000	379890000	1179000000	101500000	109120000	161530000	33506000	333980000	40747000	34985000	456820000	69484000	23434000	116590000	270650000	35465000	1269800000	8733400	294690000	2076900000	13068000	386930000	250850000	105210000	183200000	776780000	780780000	1516900000	190250000	264950000	11598000000	102320000	1824300000	1860500000
Q9Y6D5	1	Brefeldin A-inhibited guanine nucleotide-exchange protein 2	ARFGEF2	sp|Q9Y6D5|BIG2_HUMAN Brefeldin A-inhibited guanine nucleotide-exchange protein 2 OS=Homo sapiens OX=9606 GN=ARFGEF2 PE=1 SV=3	421270000	92143000	89355000	47941000	15626000	13534000	15853000	516060000	95365000	450780000	60520000	197370000	288600000	489190000	1497800000	1215500000	91939000	14439000	409220000	659350000	4507200	197680000	40396000	110060000	147380000	187950000	36826000	97226000	17458000	240940000	2540600000	26778000	290130000	31797000	110030000	135010000	183350000	311640000	349790000	2758300	167490000	250850000	57666000	29162000	22891000
Q5TH69	1	Brefeldin A-inhibited guanine nucleotide-exchange protein 3	ARFGEF3	sp|Q5TH69|BIG3_HUMAN Brefeldin A-inhibited guanine nucleotide-exchange protein 3 OS=Homo sapiens OX=9606 GN=ARFGEF3 PE=1 SV=3	286910000	76610000	19716000	194480000	9861200	9025100	40841000	101810000	44849000	51256000	31149000	46076000	334700000	346160000	165120000	136270000000	142050000	6890200	275420000	7770500	76712000	31611000	15094000	59675000	28745000	74871000	28080000	87523000	3227400	143610000	331870000	475820	194310000	14502000	3498800	59523000	599000000	88555000	179140000	1970900	169810000	239890000	148150000	195570000	93006000
P53367-2	1	Arfaptin-1	ARFIP1	sp|P53367-2|ARFP1-2_HUMAN Isoform of P53367, Isoform A of Arfaptin-1 OS=Homo sapiens OX=9606 GN=ARFIP1 PE=1 SV=2	585390000	130730000	21248000	194900000	141190000	54057000	3970800	12392000	1091800	76296000	83072000	233090000	101660000	652340000	171670000	75326000	51673000	0	916270000	7099600	49574000	59999000	46689000	69536000	8878000	134870000	137870000	346770000	0	248720000	151290000	621350	26363000	30190000	29254000	39059000	0	41617000	36329000	81620000	12040000	219300000	5787600	73176000	19678000
A0A087X1E4;P53365;P53365-3;P53365-2	5	Arfaptin-2	ARFIP2	tr|A0A087X1E4|A0A087X1E4_HUMAN Isoform of P53365, Arfaptin-2 OS=Homo sapiens OX=9606 GN=ARFIP2 PE=1 SV=1;sp|P53365|ARFP2_HUMAN Arfaptin-2 OS=Homo sapiens OX=9606 GN=ARFIP2 PE=1 SV=1;sp|P53365-3|ARFP2-3_HUMAN Isoform of P53365, Isoform 3 of Arfaptin-2 OS=Ho	133860000	670700000	92963000	403690000	135090000	118020000	280620000	181220000	11966000	275280000	333290000	1190700000	206900000	291330000	95951000	151630000	15554000	20743000	418850000	17900000	5404600	349680000	208430000	144440000	45521000	739850000	355920000	60527000	10443000	1201900000	746800000	148460000	118850000	129320000	38265000	93083000	2157500000	159150000	88062000	4752400	139530000	6198300000	1392400000	39187000	202990000
P05089;P05089-3	2	Arginase-1	ARG1	sp|P05089|ARGI1_HUMAN Arginase-1 OS=Homo sapiens OX=9606 GN=ARG1 PE=1 SV=2;sp|P05089-3|ARGI1-3_HUMAN Isoform of P05089, Isoform 3 of Arginase-1 OS=Homo sapiens OX=9606 GN=ARG1 PE=1 SV=2	8103400000	12244000000	230610000	8459500000	1368300000	2757400000	658410000	2472300000	724800000	6540200000	4486400000	766780000	15890000000	39882000000	3325600000	2027000000	569400000	521490000	15147000000	4259100000	219430000	1076900000	1944500000	6221600000	17166000000	4499900000	1224800000	4009300000	1107600000	5638300000	159910000000	884830000	2916000000	3379900000	15392000000	5512400000	2012600000	42204000000	11703000000	423170000	1179600000	4380100000	1533200000	26449000000	1156100000
P78540	1	Arginase-2, mitochondrial	ARG2	sp|P78540|ARGI2_HUMAN Arginase-2, mitochondrial OS=Homo sapiens OX=9606 GN=ARG2 PE=1 SV=1	34408000	41692000	0	1420900	0	6551100	558650	3949500	2262000	5428800	26850000	8880500	66491000	26256000	4405300	238340000	3992100	0	65454000	3272000	0	6000000	4901500	58255000	5904300	685110	1402600	7494200	310830	244440000	6650500	0	101870000	387000	804660	7825700	0	23671000	1302100	1182300	0	0	15966000	0	3183100
Q9NWB6;Q9NWB6-2;Q9NWB6-3	3	Arginine and glutamate-rich protein 1	ARGLU1	sp|Q9NWB6|ARGL1_HUMAN Arginine and glutamate-rich protein 1 OS=Homo sapiens OX=9606 GN=ARGLU1 PE=1 SV=1;sp|Q9NWB6-2|ARGL1-2_HUMAN Isoform of Q9NWB6, Isoform 2 of Arginine and glutamate-rich protein 1 OS=Homo sapiens OX=9606 GN=ARGLU1 PE=1 SV=1;sp|Q9NWB6-3|	73235000	3704300	13511000	86744000	4329200	0	0	1614400	4158600	205310000	12706000	0	11468000	5456200	28574000	22121000	0	9002700	15939000	0	7496300	42719000	31905000	40578000	1700100	98929000	3508700	62885000	0	36018000	139070000	35714000	210120000	41092000	0	8242500	1514400000	12459000	33730000	0	89600000	1262900	1820300	0	3051500
Q07960;H0YE29	3	Rho GTPase-activating protein 1	ARHGAP1	sp|Q07960|RHG01_HUMAN Rho GTPase-activating protein 1 OS=Homo sapiens OX=9606 GN=ARHGAP1 PE=1 SV=1;tr|H0YE29|H0YE29_HUMAN Isoform of Q07960, Rho GTPase-activating protein 1 (Fragment) OS=Homo sapiens OX=9606 GN=ARHGAP1 PE=1 SV=1	0	66958000	835690	25184000	6633100	2575700	0	10958000	0	0	4259400	0	54177000	18315000	10751000	53480000	70643000	22522000	175910000	0	6949500	0	4879000	0	118260000	10354000	222140000	0	0	2684100	236610000	2403700	74771000	28622000	60990000	7527500000	45809000	375000000	44706000	16843000	77213000	47731000	57347000	103220000	8814700
Q68EM7-5	2	Rho GTPase-activating protein 17	ARHGAP17	sp|Q68EM7-5|RHG17-5_HUMAN Isoform of Q68EM7, Isoform 5 of Rho GTPase-activating protein 17 OS=Homo sapiens OX=9606 GN=ARHGAP17 PE=1 SV=1	188130000	224840000	12003000	47584000	30401000	6494900	33111000	659590000	13207000	402980000	25414000	94431000	334220000	244970000	52295000	73549000	3018500	6835600	143510000	0	5921500	8390300	12717000	54152000	14156000	160800000	77581000	32611000	0	87235000	326030000	0	80096000	7150900	260660000	60692000	80266000	1281500000	51329000	37942000	101330000	238350000	21113000	58092000	25643000
Q5T5U3;A0A087WW76;A0A452Q6Z5;E7ESW5;F8W9U9;Q5T5U3-3	12	Rho GTPase-activating protein 21	ARHGAP21	sp|Q5T5U3|RHG21_HUMAN Rho GTPase-activating protein 21 OS=Homo sapiens OX=9606 GN=ARHGAP21 PE=1 SV=2;tr|A0A087WW76|A0A087WW76_HUMAN Isoform of Q5T5U3, Rho GTPase-activating protein 21 OS=Homo sapiens OX=9606 GN=ARHGAP21 PE=1 SV=1;tr|A0A452Q6Z5|A0A452Q6Z5_H	296710000	291340000	18000000	50696000	42254000	18882000	7387600	59462000	14766000	100950000	86435000	124340000	173030000	543050000	7810200	53288000	82177000	34711000	260070000	2205500	26541000	72230000	10421000	133120000	77273000	72724000	21874000	174290000	32745000	281410000	382520000	6742100	431130000	60617000	16257000	150480000	1663500000	123200000	381990000	99167000	204390000	510960000	76301000	4971600000	36551000
Q7Z5H3;Q7Z5H3-5;Q7Z5H3-3;Q7Z5H3-2;A6NJ38;A6NHM7;D6RBJ8	7	Rho GTPase-activating protein 22	ARHGAP22	sp|Q7Z5H3|RHG22_HUMAN Rho GTPase-activating protein 22 OS=Homo sapiens OX=9606 GN=ARHGAP22 PE=1 SV=1;sp|Q7Z5H3-5|RHG22-5_HUMAN Isoform of Q7Z5H3, Isoform 5 of Rho GTPase-activating protein 22 OS=Homo sapiens OX=9606 GN=ARHGAP22 PE=1 SV=1;sp|Q7Z5H3-3|RHG22-	61783000	56769000	53025000	71711000	59298000	70246000	36553000	82889000	0	227050000	79429000	167180000	1871400000	1236900000	1885600000	1435900000	112720000	123110000	4506700000	102210000	25604000	149530000	1312000000	108840000	67729000	192840000	431740000	3589400000	300300000	7100500000	3323800000	40931000	1083100000	254020000	172450000	469840000	3855600000	1668300000	352470000	539440000	239150000	2126100000	446740000	214190000	3733600
P42331-6;P42331-4;P42331-2;B7Z8K7	4	Rho GTPase-activating protein 25	ARHGAP25	sp|P42331-6|RHG25-6_HUMAN Isoform of P42331, Isoform 6 of Rho GTPase-activating protein 25 OS=Homo sapiens OX=9606 GN=ARHGAP25 PE=1 SV=2;sp|P42331-4|RHG25-4_HUMAN Isoform of P42331, Isoform 4 of Rho GTPase-activating protein 25 OS=Homo sapiens OX=9606 GN=A	100960000	10619000	15317000	71874000	88984000	201200000	58992000	89673000	18147000	6805100	8081500	81206000	116940000	413260000	22951000	80656000	176490000	4556500	455110000	26223000	12042000	121920000	26298000	58446000	47435000	10219000	20574000	24750000	533250	40726000	193810000	0	118200000	39363000	41654000	110410000	205080000	62330000	60524000	14411000	192810000	612240000	84183000	24192000	35507000
Q9UNA1-2;Q9UNA1;A0A2R8YGB3	10	Rho GTPase-activating protein 26	ARHGAP26	sp|Q9UNA1-2|RHG26-2_HUMAN Isoform of Q9UNA1, Isoform 2 of Rho GTPase-activating protein 26 OS=Homo sapiens OX=9606 GN=ARHGAP26 PE=1 SV=1;sp|Q9UNA1|RHG26_HUMAN Rho GTPase-activating protein 26 OS=Homo sapiens OX=9606 GN=ARHGAP26 PE=1 SV=1;tr|A0A2R8YGB3|A0A2	19375000	50329000	4909400	84895000	25772000	10087000	0	7677100	61943000	1097400	44534000	1309600	174780000	159880000	13616000	114820000	23285000	43102000	356150000	20011000	11827000	9704600	14722000	19671000	20760000	131380000	64230000	45401000	45063	91953000	2761000000	1492200	118250000	10416000	1674000	250000000	435090000	141020000	316590000	0	70113000	63952000	158370000	707080	160460000
E9PNT2;E9PIR1;A0A0G2JRG8;A0A0G2JNY3;Q6ZUM4;Q6ZUM4-3;Q6ZUM4-2;A0A0C4DGE6	9	Rho GTPase-activating protein 27	ARHGAP27	tr|E9PNT2|E9PNT2_HUMAN Isoform of Q6ZUM4, Rho GTPase-activating protein 27 OS=Homo sapiens OX=9606 GN=ARHGAP27 PE=1 SV=1;tr|E9PIR1|E9PIR1_HUMAN Isoform of Q6ZUM4, Rho GTPase-activating protein 27 OS=Homo sapiens OX=9606 GN=ARHGAP27 PE=1 SV=1;tr|A0A0G2JRG8|	10495000	28305000	6340900	19267000	19140000	14077000	8394500	39313000	183210000	25042000	28043000	12376000	118670000	151340000	89951000	48645000	119750000	1464300	226950000	309300000	53046000	26428000	58196000	162710000	27423000	186350000	49498000	476160000	3274000	113700000	407800000	0	196490000	3396400	26504000	10002000	223450000	263670000	1012700000	8694700	140740000	76617000	25799000	6513700	27044000
Q52LW3;F8VWZ8	2	Rho GTPase-activating protein 29	ARHGAP29	sp|Q52LW3|RHG29_HUMAN Rho GTPase-activating protein 29 OS=Homo sapiens OX=9606 GN=ARHGAP29 PE=1 SV=2;tr|F8VWZ8|F8VWZ8_HUMAN Isoform of Q52LW3, Rho GTPase-activating protein 29 OS=Homo sapiens OX=9606 GN=ARHGAP29 PE=1 SV=1	48709000	3675000	4836800	87980000	1996900	2468100	3570400	12330000	8395800	15835000	14800000	143250000	138450000	157540000	422270000	752020000	5874500	0	34265000	18683000	3110500	19340000	148770000	25321000	24669000	61031000	6295800	29824000	347390	113860000	346450000	4721400	73345000	39197000	13846000	16857000	266350000	1377600000	185400000	8963100	194980000	171260000	27643000	69366000	10985000
Q2M1Z3	2	Rho GTPase-activating protein 31	ARHGAP31	sp|Q2M1Z3|RHG31_HUMAN Rho GTPase-activating protein 31 OS=Homo sapiens OX=9606 GN=ARHGAP31 PE=1 SV=2	38476000	24442000	1442400	52306000	10837000	1541300	91898000	724180000	13809000	17406000	13799000	11260000	535510000	45845000	92470000	28595000	71961000	11338000	237120000	662650	899170	74835000	702850	88152000	24908000	2683400	1445600	13489000	6677500	159050000	2068100000	6618900	422550000	121400000	14767000	142060000	260100000	424440000	758170000	0	3511200	15047000	27034000	65401000	10066000
A7KAX9;A7KAX9-2;G3V174	5	Rho GTPase-activating protein 32	ARHGAP32	sp|A7KAX9|RHG32_HUMAN Rho GTPase-activating protein 32 OS=Homo sapiens OX=9606 GN=ARHGAP32 PE=1 SV=1;sp|A7KAX9-2|RHG32-2_HUMAN Isoform of A7KAX9, Isoform 2 of Rho GTPase-activating protein 32 OS=Homo sapiens OX=9606 GN=ARHGAP32 PE=1 SV=1;tr|G3V174|G3V174_H	82571000	67340000	17501000	239530000	32762000	63936000	3831300	23858000	174380000	14029000	48669000	40290000	772850000	1556400000	707520000	122530000	189870000	69333000	450670000	121700000	4373200	30494000	186540000	88675000	379410000	124150000	90848000	1155200000	2997100	259360000	308200000	27340000	645500000	270430000	16124000	94727000	478830000	451560000	205640000	30490000	338510000	555260000	318520000	90592000	67797000
Q9NRY4	1	Rho GTPase-activating protein 35	ARHGAP35	sp|Q9NRY4|RHG35_HUMAN Rho GTPase-activating protein 35 OS=Homo sapiens OX=9606 GN=ARHGAP35 PE=1 SV=3	411890000	599080000	26325000	208570000	13768000	90499000	13327000	217370000	246930000	130690000	34100000	212400000	723510000	2296300000	74873000	24645000	79193000	14571000	584190000	26904000	70381000	297120000	256790000	82734000	85081000	123590000	48200000	80299000	15256000	230210000	4278300000	14201000	85391000	122490000	106560000	3207800000	180010000	173440000	127690000	8520700	111950000	3522700000	136990000	436870000	112310000
E7EQN5;P98171;P98171-2;E9PCM6;A0A0B4J1X7	14	Rho GTPase-activating protein 4	ARHGAP4	tr|E7EQN5|E7EQN5_HUMAN Isoform of P98171, Rho GTPase-activating protein 4 OS=Homo sapiens OX=9606 GN=ARHGAP4 PE=1 SV=1;sp|P98171|RHG04_HUMAN Rho GTPase-activating protein 4 OS=Homo sapiens OX=9606 GN=ARHGAP4 PE=1 SV=2;sp|P98171-2|RHG04-2_HUMAN Isoform of P	10497000	942820000	0	95306000	41886000	3300200	4071500	104840000	29518000	96974000	64836000	18979000	646160000	93719000	1556100000	25620000	66343000	105280000	169720000	98278000	11204000	35831000	105830000	28088000	37530000	10758000	82563000	269630000	16584000	117330000	48127000	1981400	1602200000	41102000	42368000	132510000	41209000	382410000	63538000	15096000	97340000	65974000	64191000	48509000	8020000
E7ERK8;Q17R89-2;Q17R89-3;Q17R89;F5H6L3	7	Rho GTPase-activating protein 44	ARHGAP44	tr|E7ERK8|E7ERK8_HUMAN Isoform of Q17R89, Rho GTPase-activating protein 44 OS=Homo sapiens OX=9606 GN=ARHGAP44 PE=1 SV=3;sp|Q17R89-2|RHG44-2_HUMAN Isoform of Q17R89, Isoform 2 of Rho GTPase-activating protein 44 OS=Homo sapiens OX=9606 GN=ARHGAP44 PE=1 SV=	127450000	93348000	7606400	24252000	0	24479000	178860000	77872000	65762000	33720000	24412000	233560000	175830000	113110000	299560000	23606000	82634000	9399100	5067300000	34569000	5512900	20760000	8846200	314240000	109490000	45544000	5840300	67596000	14280000	76806000	131660000	7052600	835480000	420850000	68052000	311680000	583300000	351860000	47926000	30160000	47765000	190600000	35872000	15625000	4453700
A0A0A0MSK6;Q13017-2;Q13017	6	Rho GTPase-activating protein 5	ARHGAP5	tr|A0A0A0MSK6|A0A0A0MSK6_HUMAN Isoform of Q13017, Rho GTPase-activating protein 5 OS=Homo sapiens OX=9606 GN=ARHGAP5 PE=1 SV=1;sp|Q13017-2|RHG05-2_HUMAN Isoform of Q13017, Isoform 2 of Rho GTPase-activating protein 5 OS=Homo sapiens OX=9606 GN=ARHGAP5 PE=1	65493000	121170000	20231000	137900000	18394000	26901000	288970000	711200000	8194100	61202000	151840000	63778000	276680000	971860000	208680000	106620000	408370000	3407700	752740000	43160000	29982000	91417000	214380000	2874100	56572000	240320000	45553000	15074000	9215700	307120000	708630000	3854100	591580000	239450000	92327000	605460000	1252600000	601080000	244260000	270970000	50708000	402150000	342080000	149600000	127450000
O43182;O43182-3;O43182-2;O43182-4;H7BYE6;O43182-5	6	Rho GTPase-activating protein 6	ARHGAP6	sp|O43182|RHG06_HUMAN Rho GTPase-activating protein 6 OS=Homo sapiens OX=9606 GN=ARHGAP6 PE=1 SV=3;sp|O43182-3|RHG06-3_HUMAN Isoform of O43182, Isoform 2 of Rho GTPase-activating protein 6 OS=Homo sapiens OX=9606 GN=ARHGAP6 PE=1 SV=3;sp|O43182-2|RHG06-2_HU	8002200	287660000	717240000	3169900	183350000	1329900000	0	6793500	0	7137600	2055100000	39283000	1170100000	1631400000	855030000	127030000	494180	0	239610000	0	68080000	99893000	143430000	22393000	206080	0	217880000	322370000	381390000	276890000	924650000	0	1121700000	68298000	2568900000	429160000	63475000	169630000	5689600	112280000	7881700	7579000000	1868200000	458090000	1598700
J3KTF8;J3QQX2;P52565;J3KRE2	4	Rho GDP-dissociation inhibitor 1	ARHGDIA	tr|J3KTF8|J3KTF8_HUMAN Isoform of P52565, Rho GDP-dissociation inhibitor 1 (Fragment) OS=Homo sapiens OX=9606 GN=ARHGDIA PE=1 SV=8;tr|J3QQX2|J3QQX2_HUMAN Isoform of P52565, Rho GDP-dissociation inhibitor 1 OS=Homo sapiens OX=9606 GN=ARHGDIA PE=1 SV=1;sp|P5	27439000	26364000	12994000	32006000	18725000	23068000	4295900	63428000	1568300	141970000	9970300	67364000	66901000	42875000	0	31855000	5775900	232280	22205000	11512000	85270000	0	3255700	33519000	101690000	14552000	18777000	37878000	0	22283000	430370000	1599500	3178300	240960	85058000	39665000	276820000	330130000	31199000	7725700	42051000	362080000	42270000	264260000	5442200
P52566;F5H2R5;F5H6Q0;F5H3P3;H0YGX7	5	Rho GDP-dissociation inhibitor 2	ARHGDIB	sp|P52566|GDIR2_HUMAN Rho GDP-dissociation inhibitor 2 OS=Homo sapiens OX=9606 GN=ARHGDIB PE=1 SV=3;tr|F5H2R5|F5H2R5_HUMAN Isoform of P52566, Rho GDP-dissociation inhibitor 2 (Fragment) OS=Homo sapiens OX=9606 GN=ARHGDIB PE=1 SV=1;tr|F5H6Q0|F5H6Q0_HUMAN Is	0	63129000	0	3699000	4852700	7717000	1924200	2785900	0	0	0	115700000	0	142490000	0	22249000	3214100	0	8867800	0	25224	0	0	0	0	0	0	18979000	0	22818000	0	0	0	0	17920000	0	2334700	0	0	0	5946500	50614000	3645900	0	737010
M0QZR4;Q92888-2;Q92888;M0QYC1	8	Rho guanine nucleotide exchange factor 1	ARHGEF1	tr|M0QZR4|M0QZR4_HUMAN Isoform of Q92888, Rho guanine nucleotide exchange factor 1 OS=Homo sapiens OX=9606 GN=ARHGEF1 PE=1 SV=1;sp|Q92888-2|ARHG1-2_HUMAN Isoform of Q92888, Isoform 2 of Rho guanine nucleotide exchange factor 1 OS=Homo sapiens OX=9606 GN=AR	49331000	36723000	0	31500000	9002200	2300000	9872300	5077700	1638200	26718000	4551000	38389000	8402200	120750000	31758000	48336000	12150000	987500	235890000	0	222270000	93492000	6931400	9277200	105890000	56036000	1139500	33770000	1112100	8356200	178910000	3010600	52539000	100990000	42431000	499340000	89168000	758790000	49910000	4258700	79735000	216690000	2041600	88794000	0
Q5VXI4;Q9HCE6-3;Q9HCE6-2;Q9HCE6;Q9HCE6-4;Q9HCE6-5;A0A384DVK7	7	Rho guanine nucleotide exchange factor 10-like protein	ARHGEF10L	tr|Q5VXI4|Q5VXI4_HUMAN Isoform of Q9HCE6, Rho guanine nucleotide exchange factor 10-like protein OS=Homo sapiens OX=9606 GN=ARHGEF10L PE=1 SV=2;sp|Q9HCE6-3|ARGAL-3_HUMAN Isoform of Q9HCE6, Isoform 3 of Rho guanine nucleotide exchange factor 10-like protein	16641000	132390000	35148000	27554000	17016000	40526000	9428900	92297000	5048400	117290000	28241000	86621000	375530000	50125000	140590000	34694000	22334000	0	88173000	12136000	841450	80734000	559830	46183000	259160000	44961000	67072000	50075000	11246000	85293000	83351000	0	519630000	83456000	19802000	6190700	11281000	63387000	180870000	0	128440000	69825000	24507000	132510000	3417100
O15085;O15085-2	2	Rho guanine nucleotide exchange factor 11	ARHGEF11	sp|O15085|ARHGB_HUMAN Rho guanine nucleotide exchange factor 11 OS=Homo sapiens OX=9606 GN=ARHGEF11 PE=1 SV=1;sp|O15085-2|ARHGB-2_HUMAN Isoform of O15085, Isoform 2 of Rho guanine nucleotide exchange factor 11 OS=Homo sapiens OX=9606 GN=ARHGEF11 PE=1 SV=1	241830000	129230000	52368000	804240000	82358000	145630000	20092000	93824000	143990000	113650000	225760000	151550000	879640000	339750000	702980000	427120000	286330000	132980000	713510000	221720000	26488000	231290000	57338000	484110000	194240000	151060000	253560000	1822800000	4779100	352460000	981420000	63458000	67593000	715690000	586100000	241440000	411730000	556990000	691340000	38918000	270430000	310320000	121050000	532820000	127440000
Q9NZN5;E9PMR6;Q9NZN5-2	3	Rho guanine nucleotide exchange factor 12	ARHGEF12	sp|Q9NZN5|ARHGC_HUMAN Rho guanine nucleotide exchange factor 12 OS=Homo sapiens OX=9606 GN=ARHGEF12 PE=1 SV=1;tr|E9PMR6|E9PMR6_HUMAN Isoform of Q9NZN5, Rho guanine nucleotide exchange factor 12 OS=Homo sapiens OX=9606 GN=ARHGEF12 PE=1 SV=1;sp|Q9NZN5-2|ARHG	2499500000	315020000	27205000	14474000	238270000	5335000	203530000	456430000	321830000	30932000	110110000	4416700	134600000	747640000	97494000	271220000	55036000	9571100	1683000000	63113000	9471000	915570000	79811000	348200000	609320000	32533000	19755000	624850000	90851000	548530000	56515000	17779000	8270700000	23106000	91018000	78732000	37681000	571110000	144930000	79421000	99585000	171960000	5948600	243400000	46225000
Q96PE2	1	Rho guanine nucleotide exchange factor 17	ARHGEF17	sp|Q96PE2|ARHGH_HUMAN Rho guanine nucleotide exchange factor 17 OS=Homo sapiens OX=9606 GN=ARHGEF17 PE=1 SV=1	92127000	115700000	25089000	95465000	1976600	18914000	8594100	131770000	9649200	41890000	124600000	26097000	175060000	348190000	92627000	208500000	151890000	5967200	576100000	4479500	31850000	74069000	2864500	13106000	18840000	7393700	26729000	153680000	11088000	307680000	170050000	199280000	447620000	55070000	43683000	1008700000	58013000	174180000	76154000	87211000	316630000	536330000	391220000	29262000	15290000
A0A3B3IPE9;Q6ZSZ5-1;M0QZS0;A0A087WZG4;Q6ZSZ5-2	5	Rho guanine nucleotide exchange factor 18	ARHGEF18	tr|A0A3B3IPE9|A0A3B3IPE9_HUMAN Isoform of Q6ZSZ5, Rho guanine nucleotide exchange factor 18 OS=Homo sapiens OX=9606 GN=ARHGEF18 PE=1 SV=1;sp|Q6ZSZ5-1|ARHGI-1_HUMAN Isoform of Q6ZSZ5, Isoform 5 of Rho guanine nucleotide exchange factor 18 OS=Homo sapiens OX	132970000	74697000	13065000	410210000	166140000	13073000	4388300	104230000	7828600	27077000	39975000	537080000	174180000	31152000	141310000	35258000	31276000	693020	303640000	2865600	359660000	45666000	0	3314700	385060	13929000	64701000	29043000	17734000	413880000	79999000	3546900	276490000	12055000	22446000	254000000	677390000	1692300000	500830000	424040	32964000	66951000	137170000	16681000	47337000
V9GYM8;Q92974-3;Q92974-2;Q92974	10	Rho guanine nucleotide exchange factor 2	ARHGEF2	tr|V9GYM8|V9GYM8_HUMAN Isoform of Q92974, Rho guanine nucleotide exchange factor 2 OS=Homo sapiens OX=9606 GN=ARHGEF2 PE=1 SV=1;sp|Q92974-3|ARHG2-3_HUMAN Isoform of Q92974, Isoform 3 of Rho guanine nucleotide exchange factor 2 OS=Homo sapiens OX=9606 GN=AR	421270000	181620000	22837000	76273000	29424000	114060000	47999000	76476000	0	72459000	6061000	50084000	233850000	215590000	54950000	182290000	40368000	77748000	125630000	57133000	14338000	96464000	49646000	35574000	48573000	111550000	55944000	444760000	139350000	544430000	636770000	32625000	155070000	423120000	766600000	86875000	290270000	792150000	272660000	14696000	98620000	432290000	38012000	76070000	68873000
Q86VW2-2;Q86VW2	2	Rho guanine nucleotide exchange factor 25	ARHGEF25	sp|Q86VW2-2|ARHGP-2_HUMAN Isoform of Q86VW2, Isoform 2 of Rho guanine nucleotide exchange factor 25 OS=Homo sapiens OX=9606 GN=ARHGEF25 PE=1 SV=2;sp|Q86VW2|ARHGP_HUMAN Rho guanine nucleotide exchange factor 25 OS=Homo sapiens OX=9606 GN=ARHGEF25 PE=1 SV=2	47770000	36765000	11495000	7047300	8048000	44906000	0	2256900	445770	20094000	28086000	23644000	14901000	78936000	102870000	44408000	76996000	6618300	128950000	35574000	19839000	3489700	12706000	8949500	57310000	23079000	21757000	111020000	19078000	106480000	687420000	987120	0	19179000	20013000	20671000	80033000	591690000	100630000	15934000	132340000	82079000	45703000	4846700	79142000
Q8N1W1-3;Q8N1W1-6;Q8N1W1-4	5	Rho guanine nucleotide exchange factor 28	ARHGEF28	sp|Q8N1W1-3|ARG28-3_HUMAN Isoform of Q8N1W1, Isoform 3 of Rho guanine nucleotide exchange factor 28 OS=Homo sapiens OX=9606 GN=ARHGEF28 PE=1 SV=3;sp|Q8N1W1-6|ARG28-6_HUMAN Isoform of Q8N1W1, Isoform 6 of Rho guanine nucleotide exchange factor 28 OS=Homo sa	13361000	274630000	16736000	60639000	91093000	55400000	7652900	120650000	0	185490000	91251000	169040000	651840000	1514100000	150200000	226300000	108030000	46185000	12988000000	23443000	19882000	547460000	139220000	69249000	700580000	341210000	40929000	881090000	61083000	1649900000	417070000	2615500	5702500000	1394400000	91855000	497290000	135350000	636780000	614750000	67336000	107150000	477380000	296930000	15901000	46609000
E7EV07;A0A087X0P1	5	Isoform of Q9NR80, Rho guanine nucleotide exchange factor 4	ARHGEF4	tr|E7EV07|E7EV07_HUMAN Isoform of Q9NR80, Rho guanine nucleotide exchange factor 4 OS=Homo sapiens OX=9606 GN=ARHGEF4 PE=1 SV=2;tr|A0A087X0P1|A0A087X0P1_HUMAN Isoform of Q9NR80, Rho guanine nucleotide exchange factor 4 OS=Homo sapiens OX=9606 GN=ARHGEF4 PE	21894000	178260000	29347000	77646000	19971000	19313000	26362000	91419000	5994200	219130000	32923000	181410000	547430000	162650000	531860000	31927000	133670000	8044600	608140000	59253000	29394000	133470000	6735600	611240000	597300000	4135300	34109000	71309000	0	155910000	254650000	64906000	35948000	232340000	424590000	7196500000	7378700000	264900000	199650000	9973100	126010000	190510000	742000000	933380000	37819000
Q8TER5-3;Q8TER5-2;Q8TER5-4;Q8TER5	4	Rho guanine nucleotide exchange factor 40	ARHGEF40	sp|Q8TER5-3|ARH40-3_HUMAN Isoform of Q8TER5, Isoform 3 of Rho guanine nucleotide exchange factor 40 OS=Homo sapiens OX=9606 GN=ARHGEF40 PE=1 SV=3;sp|Q8TER5-2|ARH40-2_HUMAN Isoform of Q8TER5, Isoform 2 of Rho guanine nucleotide exchange factor 40 OS=Homo sa	0	50733000	1254600	51980000	83980000	0	3808900	118140000	35946000	19115000	15701000	59771000	135680000	191090000	173670000	113190000	0	19933000	155970000	7740700	0	33935000	48902000	46917000	0	10997000	34841000	561060000	1036100	29808000	1295400000	1783100	302040000	265460000	22752000	147240000	50886000	241660000	195870000	3398100	907090000	330920000	67453000	2150300	11710000
A0A2R8YG42;B1ALK7;Q14155-3;Q14155;Q14155-2;Q14155-6;E7EUY6;E9PDQ5	13	Rho guanine nucleotide exchange factor 7	ARHGEF7	tr|A0A2R8YG42|A0A2R8YG42_HUMAN Isoform of Q14155, Rho guanine nucleotide exchange factor 7 OS=Homo sapiens OX=9606 GN=ARHGEF7 PE=1 SV=1;tr|B1ALK7|B1ALK7_HUMAN Isoform of Q14155, Rho guanine nucleotide exchange factor 7 OS=Homo sapiens OX=9606 GN=ARHGEF7 PE	79225000	22239000	8745600	92088000	5059900	656710	957450	43963000	0	6145100	11878000	815040000	2174400000	125880000	343820000	8350900	55826000	28857000	28786000	0	12264000	24391000	17476000	75283000	23017000	81173000	127120000	69344000	17335000000	119300000	226840000	1519100	103690000	25835000	39389000	295760000	566770000	391830000	866810000	876700	309040000	101740000	69736000	1819500000	173880000
O43307-3;A0A1B0GVC4;A0A1B0GTC2;B1AMR3;A0A1B0GV84;A0A1B0GWI5;A0A0A6YYF8;O43307-2;O43307;A0A1B0GV82;A0A1B0GVV2;A0A0A6YYB3	15	Rho guanine nucleotide exchange factor 9	ARHGEF9	sp|O43307-3|ARHG9-3_HUMAN Isoform of O43307, Isoform 3 of Rho guanine nucleotide exchange factor 9 OS=Homo sapiens OX=9606 GN=ARHGEF9 PE=1 SV=3;tr|A0A1B0GVC4|A0A1B0GVC4_HUMAN Isoform of O43307, Rho guanine nucleotide exchange factor 9 OS=Homo sapiens OX=96	101430000	21551000	0	144260000	23549000	0	41267000	18316000	0	5537900	179180000	25073000	1134100000	28689000	7552500	35427000	22130000	0	94618000	0	0	684990	1088500	4912000	6944800	0	0	0	0	299570000	63430000	0	1232700	0	8171100	12188000	3193100	26306000	68793000	8492500	11428000	3760900	12112000	553890	1563400
O14497;O14497-2;H0Y488;A0A1B0GTU5;O14497-3	8	AT-rich interactive domain-containing protein 1A	ARID1A	sp|O14497|ARI1A_HUMAN AT-rich interactive domain-containing protein 1A OS=Homo sapiens OX=9606 GN=ARID1A PE=1 SV=3;sp|O14497-2|ARI1A-2_HUMAN Isoform of O14497, Isoform 2 of AT-rich interactive domain-containing protein 1A OS=Homo sapiens OX=9606 GN=ARID1A	48610000	11472000	2946300	196860000	77817000	18095000	45741000	40016000	11064000	2242200000	692710000	30880000	62304000	75039000	56329000	46601000	65880000	24271000	749560000	91489000	43815000	101100000	11042000	19425000	15109000	158500000	29321000	138230000	78218000	47745000	2861000000	22557000	5578400	1214900000	401350000	73564000	53545000	142080000	114820000	34913000	91269000	62191000	4742300	71180000	20045000
Q14865;Q14865-2	4	AT-rich interactive domain-containing protein 5B	ARID5B	sp|Q14865|ARI5B_HUMAN AT-rich interactive domain-containing protein 5B OS=Homo sapiens OX=9606 GN=ARID5B PE=1 SV=3;sp|Q14865-2|ARI5B-2_HUMAN Isoform of Q14865, Isoform 2 of AT-rich interactive domain-containing protein 5B OS=Homo sapiens OX=9606 GN=ARID5B	15649000	1200800000	4953300	53808000	2723400	3646800	11281000	5755400	79994	83954000	1976500	3299300	72440000	163990000	10263000	38140000	199260	95659	248490000	1917300	1153900	16763000	20586000	4025100	2875000	1010500	10946000	170450000	874000	321210000	214910000	14451000	190060000	38230000	37462000	19026000	12119000	154160000	30319000	5281300	15762000	21248000	5587000	24950000	1501000
Q9Y4X5	4	E3 ubiquitin-protein ligase ARIH1	ARIH1	sp|Q9Y4X5|ARI1_HUMAN E3 ubiquitin-protein ligase ARIH1 OS=Homo sapiens OX=9606 GN=ARIH1 PE=1 SV=2	0	54312000	22260000	577960000	132290000	223570000	12685000	65276000	31239000	165970000	396420000	20194000	508040000	268950000	27039000	446410000	356030000	302420000	353710000	0	153880000	247260000	5634800	17520000	137360000	363540000	231760000	30490000	6786800	156380000	407680000	59328000	287860000	615480000	126970000	458200000	928930000	1235700000	655060000	125650000	789250000	446430000	281190000	122860000	155230000
O95376	2	E3 ubiquitin-protein ligase ARIH2	ARIH2	sp|O95376|ARI2_HUMAN E3 ubiquitin-protein ligase ARIH2 OS=Homo sapiens OX=9606 GN=ARIH2 PE=1 SV=1	130190000	164850000	0	0	0	4151300	859610	8198200	0	60315000	17572000	5038200	31529000	139370000	35286000	36688000	45101000	926190	56436000	4566500	7021000	0	3094600	10695000	24244000	7763000	6766200	45339000	0	19524000	98579000	0	81848000	2987800	154920000	7069500	24553000	446870000	45924000	0	87913000	768950000	0	6790900	35213000
F8VYN9;P40616;P40616-2	6	ADP-ribosylation factor-like protein 1	ARL1	tr|F8VYN9|F8VYN9_HUMAN Isoform of P40616, ADP-ribosylation factor-like protein 1 OS=Homo sapiens OX=9606 GN=ARL1 PE=1 SV=1;sp|P40616|ARL1_HUMAN ADP-ribosylation factor-like protein 1 OS=Homo sapiens OX=9606 GN=ARL1 PE=1 SV=1;sp|P40616-2|ARL1-2_HUMAN Isofor	38426000	29378000	2436500	49441000	15404000	5664000	2369300	29362000	0	8354800	9521400	20715000	74779000	193430000	149520000	97124000	85719000	3370900	134220000	4034100	2211000000	34738000	62530000	10738000	182190000	223440000	13367000	154290000	406700	132250000	297860000	5811400	270630000	100380000	228350000	68683000	36952000	210180000	95938000	9898900	148960000	572570000	6438400	113870000	43888000
Q9NXU5;A0A087WUW9;A0A0B4J222	3	ADP-ribosylation factor-like protein 15	ARL15	sp|Q9NXU5|ARL15_HUMAN ADP-ribosylation factor-like protein 15 OS=Homo sapiens OX=9606 GN=ARL15 PE=1 SV=1;tr|A0A087WUW9|A0A087WUW9_HUMAN Isoform of Q9NXU5, ADP-ribosylation factor-like protein 15 OS=Homo sapiens OX=9606 GN=ARL15 PE=1 SV=1;tr|A0A0B4J222|A0A0	3285900	2124600	0	0	0	0	0	0	0	3401600	0	0	0	0	5431200	0	47689000	0	401590000	0	44809000	0	0	0	529740000	0	0	0	0	19708000	0	0	32144000	0	30183000	0	2314900	29847000	4194500	0	5203500	10393000	2463600	0	0
P36404;V9GYD0;P36404-2	3	ADP-ribosylation factor-like protein 2	ARL2;ARL2-SNX15	sp|P36404|ARL2_HUMAN ADP-ribosylation factor-like protein 2 OS=Homo sapiens OX=9606 GN=ARL2 PE=1 SV=4;tr|V9GYD0|V9GYD0_HUMAN ARL2-SNX15 readthrough (NMD candidate) OS=Homo sapiens OX=9606 GN=ARL2-SNX15 PE=3 SV=1;sp|P36404-2|ARL2-2_HUMAN Isoform of P36404,	67198000	158700000	2680000	235200000	24020000	84677000	102820000	392160000	32305000	35478000	273600000	147100000	380600000	344690000	363730000	172300000	220360000	37253000	658210000	7700000	57112000	3731300	0	14187000	2481000000	293800000	433170000	181590000	5018100	983470000	1075100000	10661000	582350000	110520000	435320000	659540000	1050100000	6132800000	1663800000	27130000	177630000	179710000	291180000	1750400000	64052000
P36405	1	ADP-ribosylation factor-like protein 3	ARL3	sp|P36405|ARL3_HUMAN ADP-ribosylation factor-like protein 3 OS=Homo sapiens OX=9606 GN=ARL3 PE=1 SV=2	26744000	101310000	28952000	42079000	14763000	28103000	37721000	21166000	192620	1882200000	24558000	66090000	250530000	337170000	144690000	138700000	1331400	19186000	284950000	123790000	10998000	136950000	24771000	5575400	1598800000	33833000	52238000	4110400000	5343900	211290000	248880000	8374900	270350000	93606000	60751000	40228000	71970000	79303000	214780000	1065100000	89685000	132630000	206120000	199470000	10253000
Q9Y689;Q9Y689-2	3	ADP-ribosylation factor-like protein 5A	ARL5A	sp|Q9Y689|ARL5A_HUMAN ADP-ribosylation factor-like protein 5A OS=Homo sapiens OX=9606 GN=ARL5A PE=1 SV=1;sp|Q9Y689-2|ARL5A-2_HUMAN Isoform of Q9Y689, Isoform 2 of ADP-ribosylation factor-like protein 5A OS=Homo sapiens OX=9606 GN=ARL5A PE=1 SV=1	8605300	9412100	3900600	12658000	19661000	0	0	9031900	0	25575000	241870000	15461000	156800000	605690000	717080000	255690000	1707300	783560	487170000	938150	3125000	473680000	2208000	140150000	6129500	139950000	6156100	97250000	5345400	115450000	11258000000	7283200	26689000	459310000	27383000	5088000	141600000	91660000	150570000	32394000	111690000	205580000	12252000	345420000	5478900
Q66PJ3-2;F5H7X4;Q66PJ3-3;Q66PJ3;Q66PJ3-5;F5GYV5;F8WCT1;A0A0C4DG62;Q66PJ3-7	13	ADP-ribosylation factor-like protein 6-interacting protein 4	ARL6IP4	sp|Q66PJ3-2|AR6P4-2_HUMAN Isoform of Q66PJ3, Isoform 2 of ADP-ribosylation factor-like protein 6-interacting protein 4 OS=Homo sapiens OX=9606 GN=ARL6IP4 PE=1 SV=2;tr|F5H7X4|F5H7X4_HUMAN Isoform of Q66PJ3, ADP-ribosylation factor-like protein 6-interacting	34160000	28808000	346140	29680000	5926800	34211000	52371000	28640000	21441000	48989000	13273000	211290000	122190000	93516000	62065000	102270000	8826300	20603000	135200000	120010000	10842000	9120700	51896000	67639000	35477000	129540000	39391000	109530000	9365000	54092000	11565000	23263000	206650000	1313900000	77674000	107950000	91553000	135500000	287680000	39689000	34398000	79552000	226530000	25611000	5712200
O75915;F8WF90;C9JQU6;F8WF33	4	PRA1 family protein 3	ARL6IP5	sp|O75915|PRAF3_HUMAN PRA1 family protein 3 OS=Homo sapiens OX=9606 GN=ARL6IP5 PE=1 SV=1;tr|F8WF90|F8WF90_HUMAN Isoform of O75915, PRA1 family protein OS=Homo sapiens OX=9606 GN=ARL6IP5 PE=1 SV=1;tr|C9JQU6|C9JQU6_HUMAN Isoform of O75915, PRA1 family protei	197110000	472850000	89569000	330960000	100110000	49224000	43877000	351690000	12623000	237170000	63555000	282950000	218260000	120110000	114510000	63035000	21431000	11957000	500080000	12646000	13775000	68939000	76593000	59887000	68808000	141630000	116960000	53512000	3796600	296380000	1099600000	27287000	112300000	136450000	45083000	45807000	197520000	124940000	43476000	53975000	121910000	346950000	11525000	31170000	47463000
Q96BM9	2	ADP-ribosylation factor-like protein 8A	ARL8A	sp|Q96BM9|ARL8A_HUMAN ADP-ribosylation factor-like protein 8A OS=Homo sapiens OX=9606 GN=ARL8A PE=1 SV=1	8959300	50725000	4214300	73693000	39049000	13023000	5970500	149990000	85793	40685000	57371000	50800000	102890000	178860000	11829000	65363000	23950000	10570000	169800000	17960000	7633300	12360000	41222000	21115000	80500000	19013000	26940000	96614000	5687800	271530000	640630000	5991100	433520000	137290000	46476000	116960000	101390000	186020000	55501000	25123000	128550000	159800000	27978000	173590000	36694000
Q9NVJ2	2	ADP-ribosylation factor-like protein 8B	ARL8B	sp|Q9NVJ2|ARL8B_HUMAN ADP-ribosylation factor-like protein 8B OS=Homo sapiens OX=9606 GN=ARL8B PE=1 SV=1	235780000	223530000	7740100	65778000	74945000	23653000	17034000	248840000	2561600	342470000	64038000	261650000	614670000	330190000	83824000	117180000	46969000	14365000	272100000	15654000	1614900000	21762000	32173000	51198000	262410000	101090000	41174000	52062000	10152000	613000000	782900000	11809000	500870000	65317000	203860000	116090000	144160000	953760000	53977000	35460000	102530000	370530000	36046000	95616000	729420000
Q5W041-3;Q5W041-4;Q5W041;Q5W041-5	6	Armadillo repeat-containing protein 3	ARMC3	sp|Q5W041-3|ARMC3-3_HUMAN Isoform of Q5W041, Isoform 3 of Armadillo repeat-containing protein 3 OS=Homo sapiens OX=9606 GN=ARMC3 PE=2 SV=2;sp|Q5W041-4|ARMC3-4_HUMAN Isoform of Q5W041, Isoform 4 of Armadillo repeat-containing protein 3 OS=Homo sapiens OX=96	54754000	19523000	30701000	565400000	15010000	32439000	1822600	30671000	1138500	23227000	27684000	10678000	360820000	109560000	100300000	464130000	101170000	0	498530000	3978500	0	44899000	12199000	3993400	96456000	23792000	395130	305590000	0	154630000	3304300000	4199400	121070000	148960000	58035000	13000000	530650000	38431000	130480000	16563000	15031000	988280000	853490	5674300	0
J3KQ26;Q96C12;Q96C12-2;H3BS74	6	Armadillo repeat-containing protein 5	ARMC5	tr|J3KQ26|J3KQ26_HUMAN Isoform of Q96C12, Armadillo repeat-containing protein 5 OS=Homo sapiens OX=9606 GN=ARMC5 PE=1 SV=1;sp|Q96C12|ARMC5_HUMAN Armadillo repeat-containing protein 5 OS=Homo sapiens OX=9606 GN=ARMC5 PE=1 SV=2;sp|Q96C12-2|ARMC5-2_HUMAN Isof	618110000	217280000	2373800	733090000	27690000	11138000	13902000	667310000	2405600	62968000	404660000	608680000	365870000	1372700000	91823000	60004000	133360000	20833000	912200000	267100000	2017900	736910000	16204000	271220000	456100000	53197000	51657000	0	133040000	222090000	7025700000	454960	336710000	188880000	415570000	35839000	54411000	2987700000	1799500000	7021700	1360900000	34492000	65707000	207160000	96547000
Q8IUR7-7;Q8IUR7;Q8IUR7-8;Q8IUR7-2;G5E9V6;Q8IUR7-6;C9JBY2	11	Armadillo repeat-containing protein 8	ARMC8	sp|Q8IUR7-7|ARMC8-7_HUMAN Isoform of Q8IUR7, Isoform 7 of Armadillo repeat-containing protein 8 OS=Homo sapiens OX=9606 GN=ARMC8 PE=1 SV=2;sp|Q8IUR7|ARMC8_HUMAN Armadillo repeat-containing protein 8 OS=Homo sapiens OX=9606 GN=ARMC8 PE=1 SV=2;sp|Q8IUR7-8|AR	33268000	7027900	888270	6118700	2741100	1004500	0	7576300	1694700	23611000	0	32738000	41127000	423620000	9400400	37310000	12835000	13958000	200680000	31403000	16296000	5772700	742130	92754000	38883000	34300000	14318000	17225000	2396900	20677000	21649000	481060	204870000	24171000	13803000	57270000	156470000	60492000	36458000	968300	1516200000	45464000	47379000	0	1259000
Q7Z3E5;A0A2Q3DP09;Q7Z3E5-2;H7C3U7;H7BZY2	8	LisH domain-containing protein ARMC9	ARMC9	sp|Q7Z3E5|ARMC9_HUMAN LisH domain-containing protein ARMC9 OS=Homo sapiens OX=9606 GN=ARMC9 PE=1 SV=3;tr|A0A2Q3DP09|A0A2Q3DP09_HUMAN Isoform of Q7Z3E5, LisH domain-containing protein ARMC9 OS=Homo sapiens OX=9606 GN=ARMC9 PE=1 SV=1;sp|Q7Z3E5-2|ARMC9-2_HUMA	271520000	35752000	0	24182000	18487000	432830000	9286700	575230000	4278700	2314100000	26988000	291710000	814840000	2578500000	389090000	382160000	282520000	363770	1341500000	7921500	10512000	78967000	59417000	44306000	66906000	39559000	63630000	281220000	2233000	291670000	202440000	1679800	528100000	263150000	10884000	452970000	171440000	1049900000	808830000	0	5372400	467930000	237380000	114930000	30995000
Q9UH62	2	Armadillo repeat-containing X-linked protein 3	ARMCX3	sp|Q9UH62|ARMX3_HUMAN Armadillo repeat-containing X-linked protein 3 OS=Homo sapiens OX=9606 GN=ARMCX3 PE=1 SV=1	42082000	496920000	158330000	285980000	377980000	425800000	281530000	229350000	4920800	917250000	628860000	464260000	5489600000	669740000	235200000	1645500000	512640000	1940700000	1356000000	116710000	1923400000	663750000	318320000	647840000	458390000	1516000000	269600000	90389000	107610000	1741300000	56689000000	113150000	1093400000	695480000	166150000	691550000	1400600000	5093200000	7610000000	385650000	12227000000	492800000	726520000	179760000	499530000
A0A1W2PNV4;E9PF58	3	Isoform of Q92747, Actin-related protein 2/3 complex subunit 1A	ARPC1A	tr|A0A1W2PNV4|A0A1W2PNV4_HUMAN Uncharacterized protein OS=Homo sapiens OX=9606 PE=4 SV=1;tr|E9PF58|E9PF58_HUMAN Isoform of Q92747, Actin-related protein 2/3 complex subunit 1A OS=Homo sapiens OX=9606 GN=ARPC1A PE=1 SV=1	10068000000	18866000000	3446300000	4843800000	4299800000	2712900000	1952400000	8595500000	100270000	6333800000	3420700000	14928000000	3362300000	17062000000	14169000000	10235000000	2589400000	1708600000	35890000000	2881200000	1103700000	9163200000	5997800000	4371700000	3555600000	9810800000	4586600000	9203600000	1547700000	15211000000	57418000000	1419500000	9928800000	7355300000	2384000000	7563300000	4185000000	13221000000	9372900000	1884300000	15498000000	23068000000	4174500000	2176700000	4525000000
Q92747;Q92747-2	2	Actin-related protein 2/3 complex subunit 1A	ARPC1A	sp|Q92747|ARC1A_HUMAN Actin-related protein 2/3 complex subunit 1A OS=Homo sapiens OX=9606 GN=ARPC1A PE=2 SV=2;sp|Q92747-2|ARC1A-2_HUMAN Isoform of Q92747, Isoform 2 of Actin-related protein 2/3 complex subunit 1A OS=Homo sapiens OX=9606 GN=ARPC1A PE=2 SV=	1346400000	3586500000	654850000	909220000	716910000	676230000	501430000	1764900000	17776000	2073300000	783500000	3135200000	1020500000	3890600000	1912200000	1817900000	752480000	562070000	5137700000	286180000	206070000	1782800000	745880000	865730000	693900000	1732600000	1051500000	672230000	244100000	3493000000	8770400000	283270000	27142000000	1554100000	549280000	1454500000	959800000	1974000000	1565300000	177360000	3112000000	4853900000	703080000	279930000	815500000
O15144	5	Actin-related protein 2/3 complex subunit 2	ARPC2	sp|O15144|ARPC2_HUMAN Actin-related protein 2/3 complex subunit 2 OS=Homo sapiens OX=9606 GN=ARPC2 PE=1 SV=1	11018000000	18358000000	4091000000	3384000000	3783100000	2168300000	1545200000	7027400000	43492000	10941000000	2624800000	10006000000	6038600000	13748000000	9858300000	6984400000	2055600000	1315900000	32972000000	2418600000	749350000	9486300000	4300200000	3207600000	3671100000	8346700000	4276300000	11044000000	1317800000	15342000000	35881000000	1158200000	12163000000	5502100000	18879000000	2502600000	4039200000	7210000000	5488900000	1480800000	10437000000	22476000000	2893200000	1614200000	4123700000
O15145;C9JZD1;F8VR50	3	Actin-related protein 2/3 complex subunit 3	ARPC3	sp|O15145|ARPC3_HUMAN Actin-related protein 2/3 complex subunit 3 OS=Homo sapiens OX=9606 GN=ARPC3 PE=1 SV=3;tr|C9JZD1|C9JZD1_HUMAN Isoform of O15145, Actin-related protein 2/3 complex subunit 3 (Fragment) OS=Homo sapiens OX=9606 GN=ARPC3 PE=1 SV=1;tr|F8VR	2624300000	3376200000	525990000	875530000	697960000	294950000	327220000	1453200000	3129400	744210000	735320000	1780400000	1578300000	3254700000	1961500000	911820000	155960000	42949000	3186100000	101230000	139650000	236650000	1041100000	915540000	1173100000	1127700000	674380000	2814200000	328760000	2702600000	7494100000	90202000	1970700000	910510000	711560000	254000000	537710000	2310200000	689420000	140140000	1375800000	1896200000	187790000	744590000	810420000
F8WCF6;P59998;P59998-3;H7C0A3	6	Actin-related protein 2/3 complex subunit 4	ARPC4-TTLL3;ARPC4	tr|F8WCF6|F8WCF6_HUMAN Isoform of A0A0A6YYG9, Actin-related protein 2/3 complex subunit 4 OS=Homo sapiens OX=9606 GN=ARPC4-TTLL3 PE=3 SV=1;sp|P59998|ARPC4_HUMAN Actin-related protein 2/3 complex subunit 4 OS=Homo sapiens OX=9606 GN=ARPC4 PE=1 SV=3;sp|P5999	10277000000	13428000000	2506600000	3543100000	4252300000	2421000000	2649900000	7784000000	47435000	8869800000	2710700000	8429800000	8251800000	17457000000	17019000000	9593700000	2539400000	1250500000	23719000000	5117100000	1176800000	1034400000	4596300000	3686900000	3099600000	3520100000	3592100000	28356000000	2577500000	20740000000	53746000000	1252000000	19914000000	9472100000	3932500000	4614600000	5569400000	11885000000	7082500000	1332400000	11351000000	26105000000	3486000000	1668500000	2415200000
O15511;B1ALC0;O15511-2	3	Actin-related protein 2/3 complex subunit 5	ARPC5	sp|O15511|ARPC5_HUMAN Actin-related protein 2/3 complex subunit 5 OS=Homo sapiens OX=9606 GN=ARPC5 PE=1 SV=3;tr|B1ALC0|B1ALC0_HUMAN Isoform of O15511, Actin-related protein 2/3 complex subunit 5 OS=Homo sapiens OX=9606 GN=ARPC5 PE=1 SV=1;sp|O15511-2|ARPC5-	1328700000	1007100000	126570000	452800000	162830000	156020000	107820000	451290000	111480	502710000	119420000	771050000	512360000	1179900000	1357600000	628330000	143060000	50605000	1791800000	380260000	93574000	118460000	269300000	263080000	324280000	279830000	168730000	2146200000	174060000	2249000000	3038900000	77224000	1224000000	741660000	364270000	170840000	222280000	756600000	323640000	145910000	900000000	1899000000	183900000	142570000	245050000
Q9BPX5	1	Actin-related protein 2/3 complex subunit 5-like protein	ARPC5L	sp|Q9BPX5|ARP5L_HUMAN Actin-related protein 2/3 complex subunit 5-like protein OS=Homo sapiens OX=9606 GN=ARPC5L PE=1 SV=1	3647600000	5336400000	1262600000	574060000	969210000	700030000	693690000	2689700000	6845400	3913400000	631260000	2922700000	1826400000	4587100000	4233700000	2370300000	566360000	276250000	6110400000	1130100000	204810000	397760000	1823300000	1175000000	1252500000	1663100000	1076800000	5563300000	605600000	4857300000	64098000000	318240000	3380700000	2253400000	1016500000	799980000	871180000	2835200000	1697300000	187650000	2472700000	5735600000	732020000	297680000	871170000
A0A087WWQ5;P36575-2;P36575	4	Arrestin-C	ARR3	tr|A0A087WWQ5|A0A087WWQ5_HUMAN Isoform of P36575, Arrestin-C OS=Homo sapiens OX=9606 GN=ARR3 PE=1 SV=1;sp|P36575-2|ARRC-2_HUMAN Isoform of P36575, Isoform 2 of Arrestin-C OS=Homo sapiens OX=9606 GN=ARR3 PE=1 SV=2;sp|P36575|ARRC_HUMAN Arrestin-C OS=Homo sap	103880000	26973000	3467100	10696000	28240000	0	5465900	5545600	0	14655000	8614700	64017000	9012500	243790000	6455900	37708000	1852700	0	161530000	48063000	1104000	8830800	3783900	25719000	7936400	30106000	6949500	50325000	1670300	181130000	29682000	0	50596000	17348000	4047600	0	1455200	22395000	46346000	4981100	6731700	155140000	0	904390	14294000
P49407;P49407-2;E9PM35	4	Beta-arrestin-1	ARRB1	sp|P49407|ARRB1_HUMAN Beta-arrestin-1 OS=Homo sapiens OX=9606 GN=ARRB1 PE=1 SV=2;sp|P49407-2|ARRB1-2_HUMAN Isoform of P49407, Isoform 1B of Beta-arrestin-1 OS=Homo sapiens OX=9606 GN=ARRB1 PE=1 SV=2;tr|E9PM35|E9PM35_HUMAN Isoform of P49407, Beta-arrestin-1	730920000	328290000	79089000	23784000	68155000	13529000	22970000	118610000	4883400	129150000	52150000	413810000	74480000	479440000	233360000	173780000	31623000	3762600	1363900000	152390000	8809600	147870000	136810000	130980000	75544000	212790000	19602000	710330000	8515400	249490000	266630000	11589000	253990000	5717900	227750000	112380000	1852000	38236000	110090000	38606000	153200000	332050000	10133000	11849000	72336000
A0A0C4DFZ2;P15289;P15289-2	3	Arylsulfatase A;Arylsulfatase A component B;Arylsulfatase A component C	ARSA	tr|A0A0C4DFZ2|A0A0C4DFZ2_HUMAN Isoform of P15289, Arylsulfatase A OS=Homo sapiens OX=9606 GN=ARSA PE=1 SV=1;sp|P15289|ARSA_HUMAN Arylsulfatase A OS=Homo sapiens OX=9606 GN=ARSA PE=1 SV=3;sp|P15289-2|ARSA-2_HUMAN Isoform of P15289, Isoform 2 of Arylsulfatas	501370000	1385100000	220010000	834330000	216560000	294400000	506480000	690810000	237940000	401410000	563980000	1733100000	138140000	1349000000	259600000	642580000	78977000	109120000	448240000	214780000	22331000	312710000	931760000	324440000	139020000	275970000	131620000	332080000	53864000	1046400000	568590000	263400000	628450000	128980000	120790000	85094000	66180000	546020000	174320000	88679000	186330000	182890000	35966000	305480000	223050000
P54793	1	Arylsulfatase F	ARSF	sp|P54793|ARSF_HUMAN Arylsulfatase F OS=Homo sapiens OX=9606 GN=ARSF PE=1 SV=4	69500000	26401000	38114000	3905100	16417000	3776100	1365200	488770000	125650000	2364000	8606800	162640000	108800000	1316400000	49906000	25527000	2031400	1290000	30626000	2008600	7748100	170990000	285810000	18677000	118400000	84486000	51113000	100890000	0	627510000	75130000	4764900	50628000	372060000	49890000	6660600	9112200	64441000	73698000	2646300	2739100	8295400	6652600	2750900	10989000
J9JIG6;Q96EG1	2	Arylsulfatase G	ARSG	tr|J9JIG6|J9JIG6_HUMAN Isoform of Q96EG1, Arylsulfatase G OS=Homo sapiens OX=9606 GN=ARSG PE=1 SV=1;sp|Q96EG1|ARSG_HUMAN Arylsulfatase G OS=Homo sapiens OX=9606 GN=ARSG PE=1 SV=1	4215300	10772000	3456500	3288100	0	0	0	6863600	0	0	0	24217000	23892000	16845000	20816000	0	0	0	123170000	1998300	0	0	0	0	0	3965200	3514900	15355000	855250	0	0	0	0	2036400	0	0	0	3170600	32938000	1874300	0	0	0	0	3586900
Q13508-3;Q13508;Q13508-2;E7ESB3;E7ER42	7	Ecto-ADP-ribosyltransferase 3;NAD(P)(+)--arginine ADP-ribosyltransferase	ART3	sp|Q13508-3|NAR3-3_HUMAN Isoform of Q13508, Isoform 2 of Ecto-ADP-ribosyltransferase 3 OS=Homo sapiens OX=9606 GN=ART3 PE=1 SV=2;sp|Q13508|NAR3_HUMAN Ecto-ADP-ribosyltransferase 3 OS=Homo sapiens OX=9606 GN=ART3 PE=1 SV=2;sp|Q13508-2|NAR3-2_HUMAN Isoform o	34755000	7641000	1270900	13598000	0	183130	746070	3253000	947410	27353000	0	1913400	6958800	0	3688400	19456000	6719400	0	11385000	6590900	0	16568000	1695000	934260	44122000	12971000	0	649980	0	66299000	35179000	157540	2179500	679850	1370200	0	0	48839000	2342300	2784400	0	4030200	0	145670	6731900
A0A1B0GW68;Q13510-2;Q13510;A0A1B0GUH5;A0A1B0GTZ5;A0A1B0GTM3;A0A1B0GUA4;E7EMM4;A0A1B0GUG1;A0A1B0GUE3;A0A1B0GUW4;A0A1B0GTP7;Q13510-3;A0A1B0GVG2;A0A1B0GUB3;A0A1B0GV06	26	Acid ceramidase;Acid ceramidase subunit alpha;Acid ceramidase subunit beta	ASAH1	tr|A0A1B0GW68|A0A1B0GW68_HUMAN Isoform of Q13510, Acid ceramidase OS=Homo sapiens OX=9606 GN=ASAH1 PE=1 SV=1;sp|Q13510-2|ASAH1-2_HUMAN Isoform of Q13510, Isoform 2 of Acid ceramidase OS=Homo sapiens OX=9606 GN=ASAH1 PE=1 SV=5;sp|Q13510|ASAH1_HUMAN Acid cer	55059000000	37290000000	5040700000	7608300000	3753300000	3368100000	5846800000	17550000000	279380000	8855200000	4225800000	30341000000	4121200000	27324000000	23015000000	6600700000	1357700000	1059200000	33035000000	6567700000	3140400000	13582000000	11422000000	7590200000	3144500000	11915000000	2676300000	22077000000	1793300000	33568000000	36590000000	1469500000	9732900000	6512800000	3068600000	3948500000	2531600000	6323300000	3832200000	8807400000	13840000000	27209000000	1404300000	2135200000	2898000000
A0A0A0MRE5;Q9ULH1;Q9ULH1-2;H0YBF7	6	Arf-GAP with SH3 domain, ANK repeat and PH domain-containing protein 1	ASAP1	tr|A0A0A0MRE5|A0A0A0MRE5_HUMAN Isoform of Q9ULH1, Arf-GAP with SH3 domain, ANK repeat and PH domain-containing protein 1 OS=Homo sapiens OX=9606 GN=ASAP1 PE=1 SV=1;sp|Q9ULH1|ASAP1_HUMAN Arf-GAP with SH3 domain, ANK repeat and PH domain-containing protein 1	41374000	167110000	8568700	20554000	14119000	174850000	3715600	15707000	0	12239000	73933000	167050000	164270000	741970000	210830000	89811000	7792800	3155600	1019200000	77786000	525050	79827000	0	3649000	30937000	51490000	65088000	119960000	0	298600000	175420000	0	50735000	314160000	8449500	61409000	12523000	226100000	1038000000	980560	36184000	46349000	350850000	376430	18666000
O43150;O43150-2	3	Arf-GAP with SH3 domain, ANK repeat and PH domain-containing protein 2	ASAP2	sp|O43150|ASAP2_HUMAN Arf-GAP with SH3 domain, ANK repeat and PH domain-containing protein 2 OS=Homo sapiens OX=9606 GN=ASAP2 PE=1 SV=3;sp|O43150-2|ASAP2-2_HUMAN Isoform of O43150, Isoform 2 of Arf-GAP with SH3 domain, ANK repeat and PH domain-containing p	19852000	25665000	9350900	13211000	6114600	3565400	9698400	249630000	2209700	20210000	4487600	29684000	100550000	130410000	82049000	0	9675300	0	10527000	14812000	3976800	12596000	3640900	19714000	271600000	45529000	11527000	85412000	1340800	50744000	27546000	0	77765000	10533000	49097000	70014000	25724000	170820000	26861000	0	70146000	132070000	17375000	4367700	5161700
Q96Q27;Q96Q27-2;G3V2Z2	5	Ankyrin repeat and SOCS box protein 2	ASB2	sp|Q96Q27|ASB2_HUMAN Ankyrin repeat and SOCS box protein 2 OS=Homo sapiens OX=9606 GN=ASB2 PE=1 SV=1;sp|Q96Q27-2|ASB2-2_HUMAN Isoform of Q96Q27, Isoform 2 of Ankyrin repeat and SOCS box protein 2 OS=Homo sapiens OX=9606 GN=ASB2 PE=1 SV=1;tr|G3V2Z2|G3V2Z2_H	79378000	23387000	0	23513000	561930	3929300	0	80446000	315870	3169800	7741600	100170000	80299000	275500000	64348000	116410000	3024000	0	235820000	2593600	0	0	2143800	188900000	190370	8974600	27718000	649350	654230	18702000	192970000	205880000	107250000	9569100	165930000	6311000	61971000	58475000	162490000	1797000	55664000	108700000	29300000	45300000	16942000
Q9NWX5;F6TX30;Q9NWX5-2	3	Ankyrin repeat and SOCS box protein 6	ASB6	sp|Q9NWX5|ASB6_HUMAN Ankyrin repeat and SOCS box protein 6 OS=Homo sapiens OX=9606 GN=ASB6 PE=1 SV=1;tr|F6TX30|F6TX30_HUMAN Isoform of Q9NWX5, Ankyrin repeat and SOCS box protein 6 OS=Homo sapiens OX=9606 GN=ASB6 PE=1 SV=1;sp|Q9NWX5-2|ASB6-2_HUMAN Isoform	19810000	0	0	13227000	10518000	8005100	4878300	8203400	0	15292000	0	58675000	36747000	79779000	185300000	51134000	11971000	0	166180000	4352300	13061000	5561500	14627000	11065000	13122000	5196600	488700	108100000	0	15185000	608540000	10489000	47332000	62512000	2581900	10703000	72186000	174770000	43417000	9760900	23432000	55210000	0	35960000	109400000
Q8N3C0	2	Activating signal cointegrator 1 complex subunit 3	ASCC3	sp|Q8N3C0|ASCC3_HUMAN Activating signal cointegrator 1 complex subunit 3 OS=Homo sapiens OX=9606 GN=ASCC3 PE=1 SV=3	94004000	96418000	0	35345000	208190000	1811500	16740000	59598000	1703700	44905000	61179000	22272000	256100000	392910000	62280000	223050000	87785000	41095000	727240000	53540000	11696000	10923000	38056000	26120000	25636000	91749000	22444000	457820000	3154500	215660000	596280000	1373100	294950000	12614000	65984000	21265000	19255000	741330000	182680000	44447000	147200000	229950000	70516000	61276000	37485000
Q9Y294	1	Histone chaperone ASF1A	ASF1A	sp|Q9Y294|ASF1A_HUMAN Histone chaperone ASF1A OS=Homo sapiens OX=9606 GN=ASF1A PE=1 SV=1	59520000	6742800	0	4749000	0	0	0	2734000	0	2226000	0	14550000	35597000	0	22938000	40598000	10347000	0	23113000	0	0	0	0	6605900	0	1101400	340460	5986100	0	0	0	0	0	0	1253100	16182000	6305400	19679000	0	4234600	6712100	23409000	7356700	0	1279100
F5H8F7;Q9UBL3-3;Q9UBL3;Q9UBL3-2;H0YBF6	6	Set1/Ash2 histone methyltransferase complex subunit ASH2	ASH2L	tr|F5H8F7|F5H8F7_HUMAN Isoform of Q9UBL3, Set1/Ash2 histone methyltransferase complex subunit ASH2 OS=Homo sapiens OX=9606 GN=ASH2L PE=1 SV=1;sp|Q9UBL3-3|ASH2L-3_HUMAN Isoform of Q9UBL3, Isoform 3 of Set1/Ash2 histone methyltransferase complex subunit ASH2	14284000	14782000	19340000	4156100	4586000	13028000	2002700	6928300	17878000	196150000	40847000	103050000	50287000	185420000	6648900	47417000	4089700	1900200	56757000	0	26336000	0	5336200	22274000	13575000	25304000	0	0	2410500	369450000	181000000	0	74020000	4027500	4618800	18261000	35978000	94923000	119560000	79069000	5291400	1313200	8511900	0	55563000
P04424;P04424-2;P04424-3;F8W943	5	Argininosuccinate lyase	ASL	sp|P04424|ARLY_HUMAN Argininosuccinate lyase OS=Homo sapiens OX=9606 GN=ASL PE=1 SV=4;sp|P04424-2|ARLY-2_HUMAN Isoform of P04424, Isoform 2 of Argininosuccinate lyase OS=Homo sapiens OX=9606 GN=ASL PE=1 SV=4;sp|P04424-3|ARLY-3_HUMAN Isoform of P04424, Isof	31544000000	40129000000	7606200000	15403000000	10730000000	44246000000	13489000000	21636000000	111720000	19719000000	45007000000	14022000000	41664000000	261400000000	7948400000	29813000000	4737100000	15077000000	29142000000	40628000000	4748600000	35549000000	14354000000	70030000000	73015000000	28872000000	13585000000	11787000000	9054600000	70057000000	79972000000	19581000000	7631700000	2421400000	90463000000	1723900000	1371300000	200070000000	15820000000	2253900000	2967800000	7200100000	1486900000	28258000000	19375000000
O95671;O95671-2;O95671-3	3	N-acetylserotonin O-methyltransferase-like protein	ASMTL	sp|O95671|ASML_HUMAN Probable bifunctional dTTP/UTP pyrophosphatase/methyltransferase protein OS=Homo sapiens OX=9606 GN=ASMTL PE=1 SV=3;sp|O95671-2|ASML-2_HUMAN Isoform of O95671, Isoform 2 of Probable bifunctional dTTP/UTP pyrophosphatase/methyltransfera	2692700000	727690000	6557800	1534700000	540350000	613240000	599640000	667460000	1134100000	2512200000	1569500000	1224900000	2493000000	2196800000	1435100000	1061500000	983360000	682090000	1168200000	60844000	297080000	823600000	1374300000	607570000	928250000	895280000	1943300000	132090000	129370000	2861300000	3473300000	431680000	653250000	744280000	136730000	690080000	1101900000	3162000000	2662700000	741500000	3308000000	5675200000	3707900000	5376400000	1049800000
O43681;A0A087WXS7;K7ERW9	3	ATPase ASNA1	ASNA1	sp|O43681|ASNA_HUMAN ATPase ASNA1 OS=Homo sapiens OX=9606 GN=ASNA1 PE=1 SV=2;tr|A0A087WXS7|A0A087WXS7_HUMAN Isoform of O43681, ATPase ASNA1 OS=Homo sapiens OX=9606 GN=ASNA1 PE=1 SV=1;tr|K7ERW9|K7ERW9_HUMAN Isoform of O43681, Arsenical pump-driving ATPase (	217650000	6931400000	713900000	10205000000	674590000	2157600000	959740000	493510000	8420300	2101200000	8017100000	4391600000	1540300000	3246200000	1069500000	5508500000	10038000000	3653800000	2213100000	203240000	2797400000	3797500000	296190000	4308200000	1968200000	5915500000	1360100000	231780000	1547200000	2044500000	8715200000	221970000	14552000000	1184400000	359860000	9562300000	11319000000	3144400000	2231400000	358680000	11848000000	18992000000	13278000000	297570000	3718500000
P08243-3;P08243-2;P08243;F8WEJ5	7	Asparagine synthetase [glutamine-hydrolyzing]	ASNS	sp|P08243-3|ASNS-3_HUMAN Isoform of P08243, Isoform 3 of Asparagine synthetase [glutamine-hydrolyzing] OS=Homo sapiens OX=9606 GN=ASNS PE=1 SV=4;sp|P08243-2|ASNS-2_HUMAN Isoform of P08243, Isoform 2 of Asparagine synthetase [glutamine-hydrolyzing] OS=Homo	17423000	6021000	0	2744300	12636000	230570	0	0	0	17761000	0	7138500	0	0	30039000	0	0	0	70116000	654020	0	0	0	1340300	7123600	10811000	234510	65442000	0	422410000	53755000	977940	377060000	47379000	0	11192000	6448800	142820000	77488000	13261000	1400700	24177000	0	703460000	5242200
C9IYZ1;Q9NWL6;U3KQP1	4	Asparagine synthetase domain-containing protein 1	ASNSD1	tr|C9IYZ1|C9IYZ1_HUMAN Isoform of Q9NWL6, Asparagine synthetase domain-containing protein 1 (Fragment) OS=Homo sapiens OX=9606 GN=ASNSD1 PE=1 SV=1;sp|Q9NWL6|ASND1_HUMAN Asparagine synthetase domain-containing protein 1 OS=Homo sapiens OX=9606 GN=ASNSD1 PE=	34723000	17025000000	7790400	78743000	4688500	8820900	31763000000	19621000	645450	29809000	2191100	221540	72859000	11056000000	141690000	1237300000	110840000	31616000	391450000	2441800	88120000	918320000	97444000	291840000	9892400	148150000000	3082800	35561000	2550500	219340000	6753100000	247680000	1978000000	76543000	184110000	31485000	45080000	171240000	35231000	24106000	11114000	285630000000	492290000	12058000000	8097400
P45381	3	Aspartoacylase	ASPA	sp|P45381|ACY2_HUMAN Aspartoacylase OS=Homo sapiens OX=9606 GN=ASPA PE=1 SV=1	0	4041500	2788200	25416000	2621100	0	26588000	13373000	0	1051600	3758000	14359000	75734000	119270000	64153000	86645000	13539000	0	78514000	0	1122000	15461000	10485000	13446000	0	71602000	19807000	84852000	0	14342000	26551000	0	12429000	959570	0	57969000	43099000	32521000	9516200	442690	23811000	888240000	16505000	15569000	0
Q12797-10;Q12797	16	Aspartyl/asparaginyl beta-hydroxylase	ASPH	sp|Q12797-10|ASPH-10_HUMAN Isoform of Q12797, Isoform 10 of Aspartyl/asparaginyl beta-hydroxylase OS=Homo sapiens OX=9606 GN=ASPH PE=1 SV=3;sp|Q12797|ASPH_HUMAN Aspartyl/asparaginyl beta-hydroxylase OS=Homo sapiens OX=9606 GN=ASPH PE=1 SV=3	41876000	16069000	307830	38895000	47164000000	11695000	444750	47244000	8308800	40261000	29199000	7133200	18583000	708760000	98536000	9825200	11235000	0	386380000	57205000	34170000	28645000	3132900	3937200	13935000	25114000	584080	3198500	925160	305240000	530550000	2007400	126450000	446500000	13517000	76175000	13575000	7872100	205560000	59967000	108790000	1212300000	23582000	54583000	1321100
Q5U4P2	1	Aspartate beta-hydroxylase domain-containing protein 1	ASPHD1	sp|Q5U4P2|ASPH1_HUMAN Aspartate beta-hydroxylase domain-containing protein 1 OS=Homo sapiens OX=9606 GN=ASPHD1 PE=1 SV=3	0	422110000	631910	8548900	13868000	4213500	716480	4885200	0	38470000	62905000	12684000	4072800	23817000	179740000	12859000	0	191200	396330000	3658200	0	81319000	8183000	4021400	178370000	11819000	238410	24764000	20025000	14767000	118760000	7742700	84090000	40393000	5427800	89233000	3657800	19369000	46555000	0	49271000	31267000	6233800	15417000	0
Q8IZT6;Q8IZT6-2	3	Abnormal spindle-like microcephaly-associated protein	ASPM	sp|Q8IZT6|ASPM_HUMAN Abnormal spindle-like microcephaly-associated protein OS=Homo sapiens OX=9606 GN=ASPM PE=1 SV=2;sp|Q8IZT6-2|ASPM-2_HUMAN Isoform of Q8IZT6, Isoform 2 of Abnormal spindle-like microcephaly-associated protein OS=Homo sapiens OX=9606 GN=A	412160000	159980000	20975000	166220000	137500000	427900000	513920000	602480000	16146000	51774000	174480000	104940000	6812300000	743320000	835910000	113950000	92599000	58905000	2884200000	336050000	16582000	202830000	500420000	424850000	23087000	191750000	140510000	241010000	146360000	328970000	1574900000	208220000	465140000	498230000	202420000	18910000	373790000	259630000	324860000	57230000	1009300000	1023400000	316530000	342080000	639620000
Q9BXN1;A0A494C084;A0A494C1J0;Q5TBF2	4	Asporin	ASPN	sp|Q9BXN1|ASPN_HUMAN Asporin OS=Homo sapiens OX=9606 GN=ASPN PE=1 SV=2;tr|A0A494C084|A0A494C084_HUMAN Isoform of Q9BXN1, Asporin (Fragment) OS=Homo sapiens OX=9606 GN=ASPN PE=4 SV=1;tr|A0A494C1J0|A0A494C1J0_HUMAN Isoform of Q9BXN1, Asporin OS=Homo sapiens	0	0	0	71984000	45093000	0	0	0	0	0	2883500	0	9207200	0	0	18180000	0	0	334560000	966080	4925800	0	0	23194000	0	40374000	0	0	0	2320700000	567260000	0	0	143210000	0	36336000	0	0	0	0	175240000	0	270640000	0	0
Q53RT3	1	Retroviral-like aspartic protease 1	ASPRV1	sp|Q53RT3|APRV1_HUMAN Retroviral-like aspartic protease 1 OS=Homo sapiens OX=9606 GN=ASPRV1 PE=1 SV=1	32202000	115560000	11776000	85964000	11423000	87021000	21008000	149680000	5216400	113170000	404270000	135120000	881530000	5446700000	238950000	80861000	22848000	33810000	574160000	22232000	11311000	42893000	229310000	396860000	10289000000	251910000	12818000	590180000	7136700	449590000	1899300000	4337900	1227800000	155030000	3610900000	301280000	63706000	7138000000	409620000	0	116550000	107070000	20680000	9724400000	1000500000
Q9BZE9-2;Q9BZE9;Q9BZE9-3;J3QL04;Q9BZE9-4	11	Tether containing UBX domain for GLUT4	ASPSCR1	sp|Q9BZE9-2|ASPC1-2_HUMAN Isoform of Q9BZE9, Isoform 2 of Tether containing UBX domain for GLUT4 OS=Homo sapiens OX=9606 GN=ASPSCR1 PE=1 SV=1;sp|Q9BZE9|ASPC1_HUMAN Tether containing UBX domain for GLUT4 OS=Homo sapiens OX=9606 GN=ASPSCR1 PE=1 SV=1;sp|Q9BZE	1733000000	3424600000	421830000	595850000	1026400000	549990000	282200000	4191700000	550010000	3066600000	640190000	3098500000	3899100000	7680100000	1692500000	2840900000	375760000	436540000	7328400000	221730000	160640000	1843700000	801100000	1246800000	352420000	1322300000	580240000	653870000	405250000	5421800000	7873700000	137370000	6060400000	726010000	463470000	943640000	2292500000	2479900000	1568000000	502840000	1939200000	7443800000	472240000	595860000	791930000
Q7L266;Q7L266-2	5	Isoaspartyl peptidase/L-asparaginase;Isoaspartyl peptidase/L-asparaginase alpha chain;Isoaspartyl peptidase/L-asparaginase beta chain	ASRGL1	sp|Q7L266|ASGL1_HUMAN Isoaspartyl peptidase/L-asparaginase OS=Homo sapiens OX=9606 GN=ASRGL1 PE=1 SV=2;sp|Q7L266-2|ASGL1-2_HUMAN Isoform of Q7L266, Isoform 2 of Isoaspartyl peptidase/L-asparaginase OS=Homo sapiens OX=9606 GN=ASRGL1 PE=1 SV=2	57786000	35067000	11117000	24380000	17460000	22872000	15375000	31994000	8016000	70134000	25001000	37006000	178280000	142270000	53137000	310710000	3487100	4830900	106180000	0	7166700	7343400	21945000	9187300	16295000	24449000	9655600	817640	7885900	77750000	311660000	5191500	339450000	62776000	23855000	28260000	97937000	280820000	66085000	3910500	534090000	141430000	27116000	18285000	41254000
P00966;Q5T6L6;Q5T6L5	3	Argininosuccinate synthase	ASS1	sp|P00966|ASSY_HUMAN Argininosuccinate synthase OS=Homo sapiens OX=9606 GN=ASS1 PE=1 SV=2;tr|Q5T6L6|Q5T6L6_HUMAN Isoform of P00966, Argininosuccinate synthase (Fragment) OS=Homo sapiens OX=9606 GN=ASS1 PE=1 SV=1;tr|Q5T6L5|Q5T6L5_HUMAN Isoform of P00966, Ar	120630000	6244900000	4867300	444600000	350460000	53297000	27495000	260540000	15711000	8355200000	40801000	4706100000	149570000	3858300000	251510000	1500000000	28849000	0	3384000000	33924000	5380400	297560000	237690000	59522000	561600000	3953000000	52934000	33181000	45123000	13697000000	30718000000	4828200	2883100000	35937000	620260000	357330000	39463000	1293500000	17930000	2914400000	54229000	719520000	13741000	64983000	481440000
O14525-2;O14525;B1AJS1;O14525-3	4	Astrotactin-1	ASTN1	sp|O14525-2|ASTN1-2_HUMAN Isoform of O14525, Isoform 1 of Astrotactin-1 OS=Homo sapiens OX=9606 GN=ASTN1 PE=4 SV=3;sp|O14525|ASTN1_HUMAN Astrotactin-1 OS=Homo sapiens OX=9606 GN=ASTN1 PE=2 SV=3;tr|B1AJS1|B1AJS1_HUMAN Isoform of O14525, Astrotactin-1 OS=Hom	2458200000	1234200000	128760000	313850000	113830000	20974000	17027000	250370000	370240000	195730000	765740000	369930000	1276100000	359600000	1495600000	320970000	91054000	14399000	1207400000	63509000	28081000	407450000	236350000	229350000	218970000	249650000	1158600000	282300000	24596000	3248100000	603060000	32944000	1336600000	232840000	26403000	342170000	119920000	533810000	277860000	53356000	340580000	350060000	104310000	187090000	65189000
O75129-2;O75129	2	Astrotactin-2	ASTN2	sp|O75129-2|ASTN2-2_HUMAN Isoform of O75129, Isoform 2 of Astrotactin-2 OS=Homo sapiens OX=9606 GN=ASTN2 PE=1 SV=2;sp|O75129|ASTN2_HUMAN Astrotactin-2 OS=Homo sapiens OX=9606 GN=ASTN2 PE=1 SV=2	1258700000	389290000	47929000	171240000	99802000	51938000	22139000	912900000	93997000	262460000	95001000	209680000	197140000	422520000	799030000	235120000	138720000	15256000	2073400000	3096300	8175400	289820000	86443000	111220000	54146000	236560000	29167000	345830000	14986000	512540000	446140000	11080000	471520000	185760000	22025000	113420000	229730000	1368000000	126900000	50077000	123620000	482530000	10197000	120500000	37492000
Q9NVM9;Q9NVM9-2;H0YH12	6	Protein asunder homolog	ASUN	sp|Q9NVM9|INT13_HUMAN Integrator complex subunit 13 OS=Homo sapiens OX=9606 GN=INTS13 PE=1 SV=2;sp|Q9NVM9-2|INT13-2_HUMAN Isoform of Q9NVM9, Isoform 2 of Integrator complex subunit 13 OS=Homo sapiens OX=9606 GN=INTS13 PE=1 SV=2;tr|H0YH12|H0YH12_HUMAN Isofo	6977700	55726000	5047600	14166000	7442200	2047000	12607000	12037000	82015000	10938000	2136900	39147000	16975000	121900000	16391000	131830000	0	6325900	79549000	10494000	1345400	132070000	16292000	5310000	437770	10416000	2485600	28517000	14202000	84181000	50050000	18692000	47996000	8738700	14947000	23719000	0	29029000	904250000	2152800	29839000	40397000	972260	96767000	0
E7EWD6;Q76L83;Q76L83-2	3	Putative Polycomb group protein ASXL2	ASXL2	tr|E7EWD6|E7EWD6_HUMAN Isoform of Q76L83, Putative Polycomb group protein ASXL2 OS=Homo sapiens OX=9606 GN=ASXL2 PE=1 SV=1;sp|Q76L83|ASXL2_HUMAN Putative Polycomb group protein ASXL2 OS=Homo sapiens OX=9606 GN=ASXL2 PE=1 SV=1;sp|Q76L83-2|ASXL2-2_HUMAN Isof	11680000	292030000	6084900	453870000	85892000	30814000	61379000	19649000	5991900	18320000	118640000	46777000	103070000	389310000	48691000	136660000	5301100	17419000	131520000	28780000	8099700	971350000	100260000	15724000	24734000	59829000	19799000	84715000	7785200	99237000	678870000	47517000	68767000	9422300	151310000	232330000	49112000	144240000	201140000	8328600	127880000	242970000	6386200	9783800	15855000
Q9ULI0;Q9ULI0-2	3	ATPase family AAA domain-containing protein 2B	ATAD2B	sp|Q9ULI0|ATD2B_HUMAN ATPase family AAA domain-containing protein 2B OS=Homo sapiens OX=9606 GN=ATAD2B PE=1 SV=3;sp|Q9ULI0-2|ATD2B-2_HUMAN Isoform of Q9ULI0, Isoform 2 of ATPase family AAA domain-containing protein 2B OS=Homo sapiens OX=9606 GN=ATAD2B PE=1	208280000	2840900000	24591000	52338000	79882000	6433100	7581000	14007000	35435000	15440000	64016000	218610000	133120000	740210000	24371000	384520000	9226800	4499400	545650000	940210	34144000	49713000	24842000	6960400	53473000	93660000	15988000	856950000	0	239770000	866430000	18236000	319880000	169750000	195950000	274730000	28139000	505740000	906290000	15514000	216530000	333900000	76154000	57224000	94157000
H0Y2W2;Q9NVI7-3;Q9NVI7-2;Q9NVI7	5	ATPase family AAA domain-containing protein 3A	ATAD3A	tr|H0Y2W2|H0Y2W2_HUMAN Isoform of Q9NVI7, ATPase family AAA domain-containing protein 3A (Fragment) OS=Homo sapiens OX=9606 GN=ATAD3A PE=1 SV=1;sp|Q9NVI7-3|ATD3A-3_HUMAN Isoform of Q9NVI7, Isoform 3 of ATPase family AAA domain-containing protein 3A OS=Homo	141580000	18152000	5142100	18596000	11077000	29785000	105850000	183420000	6772200	91821000	14581000	88688000	154710000	302770000	1127900000	55972000	19210000	5172900	2003300000	9386300	3206900	16122000	39066000	53987000	48318000	69119000	41416000	720440000	102080000	133530000	320490000	0	351850000	88533000	7588800000	268700000	35262000	104590000	70630000	27280000	200500000	371890000	104060000	17216000	16192000
Q86WG3;Q86WG3-3	2	Caytaxin	ATCAY	sp|Q86WG3|ATCAY_HUMAN Caytaxin OS=Homo sapiens OX=9606 GN=ATCAY PE=1 SV=2;sp|Q86WG3-3|ATCAY-3_HUMAN Isoform of Q86WG3, Isoform 2 of Caytaxin OS=Homo sapiens OX=9606 GN=ATCAY PE=1 SV=2	600420000	1347400000	238920000	306930000	955820000	703250000	85310000	1688600000	225180000	3441800000	1211000000	1057800000	4209500000	3442000000	1380100000	3323000000	759460000	867070000	6490200000	129190000	359030000	1714600000	355030000	733880000	741420000	2857800000	1276300000	467200000	265150000	2171800000	22844000000	324700000	3593800000	2898100000	294660000	3854100000	5197400000	5572100000	5842700000	35339000	2738500000	3777200000	4203000000	109550000	1025000000
F5GXE4;O95260-2;B4E107;Q5SQQ1	4	Arginyl-tRNA--protein transferase 1	ATE1	tr|F5GXE4|F5GXE4_HUMAN Isoform of O95260, Arginyl-tRNA--protein transferase 1 OS=Homo sapiens OX=9606 GN=ATE1 PE=1 SV=1;sp|O95260-2|ATE1-2_HUMAN Isoform of O95260, Isoform ATE1-2 of Arginyl-tRNA--protein transferase 1 OS=Homo sapiens OX=9606 GN=ATE1 PE=1 S	0	184680000	0	318710000	55366000	52069000	0	89838000	0	144820000	87840000	11227000	668640000	291540000	121150000	328370000	194620000	63853000	350030000	20331000	9815400	21291000	0	43203000	593800000	586980000	113540000	0	3868400	31686000	298440000	6572800	74914000	231800000	910290000	263120000	408050000	539350000	125870000	207640000	155190000	148700000	58470000	37426000	75251000
Q99941;Q99941-2;H0Y7D7	3	Cyclic AMP-dependent transcription factor ATF-6 beta;Processed cyclic AMP-dependent transcription factor ATF-6 beta	ATF6B	sp|Q99941|ATF6B_HUMAN Cyclic AMP-dependent transcription factor ATF-6 beta OS=Homo sapiens OX=9606 GN=ATF6B PE=1 SV=2;sp|Q99941-2|ATF6B-2_HUMAN Isoform of Q99941, Isoform 1 of Cyclic AMP-dependent transcription factor ATF-6 beta OS=Homo sapiens OX=9606 GN=	28064000	470830000	0	17519000	6073700	6789900	15075000	45639000	0	34760000	4126500	55285000	204550000	265300000	26665000	90897000	2471600	3697800	193040000	10433000	0	12972000	57319000	18855000	352390000	19980000	3129400	62415000	0	571450000	804300000	39463000	30823000	29124000	47300000	11827000	21608000	119210000	81336000	105260000	8113300	199890000	6431400	239340	0
E7EVC7;Q676U5-2;Q676U5;Q676U5-3;Q676U5-5	10	Autophagy-related protein 16-1	ATG16L1	tr|E7EVC7|E7EVC7_HUMAN Isoform of Q676U5, Autophagy-related protein 16-1 OS=Homo sapiens OX=9606 GN=ATG16L1 PE=1 SV=1;sp|Q676U5-2|A16L1-2_HUMAN Isoform of Q676U5, Isoform 2 of Autophagy-related protein 16-1 OS=Homo sapiens OX=9606 GN=ATG16L1 PE=1 SV=2;sp|Q	24673000	106690000	2235400	5752200	119520000	14638000	0	25305000	2381700	152250000	38596000	14815000	25046000	108330000	6921500	6775300	1986600	5995800	20766000	0	3649100	15454000	0	5722800	19905000	4458500	7294700	30706000	170820	33548000	19110000	0	0	15351000	0	56154000	81154000	46347000	89261000	84525000	183010000	133720000	272960	120310	22295000
Q2TAZ0-3;Q2TAZ0;H7C3T2	3	Autophagy-related protein 2 homolog A	ATG2A	sp|Q2TAZ0-3|ATG2A-3_HUMAN Isoform of Q2TAZ0, Isoform 2 of Autophagy-related protein 2 homolog A OS=Homo sapiens OX=9606 GN=ATG2A PE=1 SV=3;sp|Q2TAZ0|ATG2A_HUMAN Autophagy-related protein 2 homolog A OS=Homo sapiens OX=9606 GN=ATG2A PE=1 SV=3;tr|H7C3T2|H7C3	1281100000	135850000	5062800	106810000	28247000	163420000	13537000	76531000	53249000	455890000	310570000	1320000000	678290000	639650000	434670000	247690000	149160000	21781000	1071200000	11324000	79940000	95725000	88646000	297900000	138930000	176280000	87869000	578590000	9680100	595040000	890870000	4822500	815550000	647720000	111420000	220340000	450540000	1147300000	565820000	108260000	465370000	597220000	120430000	64872000	52215000
Q96BY7	1	Autophagy-related protein 2 homolog B	ATG2B	sp|Q96BY7|ATG2B_HUMAN Autophagy-related protein 2 homolog B OS=Homo sapiens OX=9606 GN=ATG2B PE=1 SV=5	177550000	172980000	63143000	405340000	89769000	229450000	184120000	110540000	15276000	195510000	58868000	155470000	622630000	653860000	806730000	145410000	146720000	25833000	320010000	24820000	27264000	212270000	74186000	36884000	45214000	1327900000	48589000	171850000	10526000	8822400000	1043600000	7387500	900250000	495980000	34853000	139870000	680940000	391020000	265620000	450510000	171170000	144430000	54919000	29266000	4817200
Q9NT62;Q9NT62-2	4	Ubiquitin-like-conjugating enzyme ATG3	ATG3	sp|Q9NT62|ATG3_HUMAN Ubiquitin-like-conjugating enzyme ATG3 OS=Homo sapiens OX=9606 GN=ATG3 PE=1 SV=1;sp|Q9NT62-2|ATG3-2_HUMAN Isoform of Q9NT62, Isoform 2 of Ubiquitin-like-conjugating enzyme ATG3 OS=Homo sapiens OX=9606 GN=ATG3 PE=1 SV=1	30659000	23225000	0	131500000	3165500	318370	2720300	18862000	0	85281000	26626000	92494000	122850000	132330000	18472000	58804000	113210000	22951000	51839000	1437400	56672000	26158000	0	0	35639000	10523000	70835000	7116600	1249800	28038000	83325000	0	108990000	180630000	63406000	447920000	210940000	181090000	56779000	7791100	123180000	410610000	53293000	8267900	13746000
Q9Y4P1-6;Q9Y4P1;Q9Y4P1-2;Q9Y4P1-4;C9JIK8;Q9Y4P1-3	12	Cysteine protease ATG4B	ATG4B	sp|Q9Y4P1-6|ATG4B-6_HUMAN Isoform of Q9Y4P1, Isoform 6 of Cysteine protease ATG4B OS=Homo sapiens OX=9606 GN=ATG4B PE=1 SV=2;sp|Q9Y4P1|ATG4B_HUMAN Cysteine protease ATG4B OS=Homo sapiens OX=9606 GN=ATG4B PE=1 SV=2;sp|Q9Y4P1-2|ATG4B-2_HUMAN Isoform of Q9Y4P	45123000	62250000	16360000	786600000	84814000	31868000	684360	2253000	0	4434900	294360000	14973000	174080000	61495000	13752000	581310000	312530000	218420000	307560000	216000	75804000	993470	152370000	18629000	47051000	77907000	243900000	19639000	8094200	20294000	22803000	26069000	19497000	147440000	8070900	98754000	196950000	859740000	408940000	26068000	24049000	25896000	64709000	299480000	799520000
Q96DT6	4	Cysteine protease ATG4C	ATG4C	sp|Q96DT6|ATG4C_HUMAN Cysteine protease ATG4C OS=Homo sapiens OX=9606 GN=ATG4C PE=1 SV=1	5919500	19781000	609530	7940200	2209100	7662000	0	14262000	0	5549800	10042000	0	8533500	53513000	0	46255000	11330000	1092300	8845100	0	1903300	0	620460	0	571380000	7389000	7270100	7248800	0	103010000	177290000	4256100	16019000	24228000	3539500	8753700	26377000	57177000	15777000	3194100	65530000	20998000	8371400	28467000	4189800
Q9H1Y0;A0A2R8Y718;Q9H1Y0-2;A0A1B0GV54;A0A1B0GUS1;L7UQJ2	8	Autophagy protein 5	ATG5	sp|Q9H1Y0|ATG5_HUMAN Autophagy protein 5 OS=Homo sapiens OX=9606 GN=ATG5 PE=1 SV=2;tr|A0A2R8Y718|A0A2R8Y718_HUMAN Isoform of Q9H1Y0, Autophagy protein 5 OS=Homo sapiens OX=9606 GN=ATG5 PE=1 SV=1;sp|Q9H1Y0-2|ATG5-2_HUMAN Isoform of Q9H1Y0, Isoform Short of	71416000	227610000	14041000	208500000	51920000	28436000	5218200	4344800	820180	106580000	85593000	37581000	82785000	25171000	18678000	123320000	192730000	21409000	184360000	12280000	22960000	45487000	16211000	40138000	19816000	154840000	56571000	32050000	3022700	19484000	119190000	7305300	128230000	34027000	0	62194000	30007000	103760000	174890000	181170000	82020000	204200000	112560000	52943000	40093000
O95352;O95352-2;O95352-3	14	Ubiquitin-like modifier-activating enzyme ATG7	ATG7	sp|O95352|ATG7_HUMAN Ubiquitin-like modifier-activating enzyme ATG7 OS=Homo sapiens OX=9606 GN=ATG7 PE=1 SV=1;sp|O95352-2|ATG7-2_HUMAN Isoform of O95352, Isoform 2 of Ubiquitin-like modifier-activating enzyme ATG7 OS=Homo sapiens OX=9606 GN=ATG7 PE=1 SV=1;	8100500000	9701300000	1192100000	2670800000	4794000000	2609800000	2910500000	5036000000	3974200000	6860100000	2983700000	8185900000	7849700000	21052000000	8878100000	4337500000	1019600000	1205500000	14638000000	1174400000	455290000	7271200000	6004700000	4505200000	2422200000	6357000000	2249500000	1483800000	1253000000	10870000000	17030000000	708630000	9530300000	3680000000	2261200000	3810900000	3249200000	9027000000	4415800000	887310000	5594600000	8907500000	1260700000	5008900000	3563400000
Q7Z3C6-2;Q7Z3C6	5	Autophagy-related protein 9A	ATG9A	sp|Q7Z3C6-2|ATG9A-2_HUMAN Isoform of Q7Z3C6, Isoform 2 of Autophagy-related protein 9A OS=Homo sapiens OX=9606 GN=ATG9A PE=1 SV=3;sp|Q7Z3C6|ATG9A_HUMAN Autophagy-related protein 9A OS=Homo sapiens OX=9606 GN=ATG9A PE=1 SV=3	94380000	349520000	691100	314030000	50239000	4145900	182320	109240000	20868000	163580000	74874000	263370000	127110000	633660000	149420000	328630000	37533000	7893100	1316500000	11871000	110020000	6640400	27296000	12430000	54951000	19906000	13323000	89979000	15838000	3338200000	4118000000	0	817170000	232100000	22942000	14174000	45319000	112650000	35229000	129820000	149380000	415240000	45777000	12304000	1280200000
Q674R7	2	Autophagy-related protein 9B	ATG9B	sp|Q674R7|ATG9B_HUMAN Autophagy-related protein 9B OS=Homo sapiens OX=9606 GN=ATG9B PE=2 SV=1	6964400	36868000	609800	6863500	32809000	34087000	6797500	22064000	6971500	451370000	26887000	71989000	54766000	629360000	323130000	107260000	35852000	1831400	706280000	14078000	20130000	49957000	6485200	65895000	92568000	84030000	10993000	4621100000	4091900	227700000	549380000	9419300	1364200000	104490000	13820000	271340000	409560000	132040000	397580000	0	64058000	401250000	192240000	23205000	17604000
E7EMA9;Q32M88;B8ZZ60;Q32M88-2	6	Acid trehalase-like protein 1	ATHL1	tr|E7EMA9|E7EMA9_HUMAN Isoform of Q32M88, Protein-glucosylgalactosylhydroxylysine glucosidase OS=Homo sapiens OX=9606 GN=PGGHG PE=1 SV=1;sp|Q32M88|PGGHG_HUMAN Protein-glucosylgalactosylhydroxylysine glucosidase OS=Homo sapiens OX=9606 GN=PGGHG PE=1 SV=2;tr	118900000	141300000	10646000	47660000	46205000	54649000	10077000	197440000	19560000	61746000	14551000	127910000	112480000	164540000	98804000	90757000	39489000	30286000	372470000	409660000	6602200	61880000	86883000	39657000	42752000	9955700	59980000	202670000	6096600	522830000	224810000	314560	154330000	39192000	77977000	213530000	19309000	111920000	38223000	11892000	16457000	157250000	10966000	35457000	433300000
P31939;P31939-2	5	Bifunctional purine biosynthesis protein PURH;Phosphoribosylaminoimidazolecarboxamide formyltransferase;IMP cyclohydrolase	ATIC	sp|P31939|PUR9_HUMAN Bifunctional purine biosynthesis protein PURH OS=Homo sapiens OX=9606 GN=ATIC PE=1 SV=3;sp|P31939-2|PUR9-2_HUMAN Isoform of P31939, Isoform 2 of Bifunctional purine biosynthesis protein PURH OS=Homo sapiens OX=9606 GN=ATIC PE=1 SV=3	316540000	236930000	4729400	313870000	352720000	48391000	50700000	26530000	39617000	1238500000	115320000	283510000	2227000000	745550000	185810000	362280000	58992000	47143000	388520000	65209000	34231000	73112000	295840000	34605000	1424900000	170860000	191550000	181630000	6602300	638850000	7028200000	24404000	987160000	126130000	1245100000	632780000	163210000	919770000	155060000	241250000	342700000	454400000	51056000	2044400000	228610000
Q8WXF7	5	Atlastin-1	ATL1	sp|Q8WXF7|ATLA1_HUMAN Atlastin-1 OS=Homo sapiens OX=9606 GN=ATL1 PE=1 SV=1	8538200	127840000	24502000	493800000	262410000	751630000	29198000	107010000	0	284330000	657280000	254670000	1284700000	510880000	272640000	1307900000	1515300000	580420000	894500000	3996200	271100000	199780000	64272000	342020000	439370000	1218700000	1125500000	13853000	27506000	640760000	14524000000	165240000	2869300000	1827700000	1494200000	2120300000	5536900000	3453800000	3117700000	204020000	2334500000	3869200000	1856800000	320090000	337840000
Q8NHH9-2;Q8NHH9-4;Q8NHH9;B5MCN0;Q8NHH9-5;Q8NHH9-3	8	Atlastin-2	ATL2	sp|Q8NHH9-2|ATLA2-2_HUMAN Isoform of Q8NHH9, Isoform 2 of Atlastin-2 OS=Homo sapiens OX=9606 GN=ATL2 PE=1 SV=2;sp|Q8NHH9-4|ATLA2-4_HUMAN Isoform of Q8NHH9, Isoform 4 of Atlastin-2 OS=Homo sapiens OX=9606 GN=ATL2 PE=1 SV=2;sp|Q8NHH9|ATLA2_HUMAN Atlastin-2 O	3408100	55303000	479670	32146000	3095000	4085200	0	23893000	0	31090000	35692000	27645000	17201000	273930000	289890000	153210000	50641000	24378000	49384000	2893300	31925000	10305000	421450000	11417000	15010000	42740000	22945000	10071000	0	43597000	83108000	13493000	296490000	210400000	2674000	52722000	88410000	291800000	43123000	5636300	13315000	7062600	16089000	319860	9010700
Q6DD88;F5H6I7	3	Atlastin-3	ATL3	sp|Q6DD88|ATLA3_HUMAN Atlastin-3 OS=Homo sapiens OX=9606 GN=ATL3 PE=1 SV=1;tr|F5H6I7|F5H6I7_HUMAN Isoform of Q6DD88, Atlastin-3 OS=Homo sapiens OX=9606 GN=ATL3 PE=1 SV=1	2858300	2578400	0	325000000	42210000	38393000	2873000	0	0	56699000	18088000	12331000	41172000	185260000	22555000	64104000	97708000	3983800	113130000	8462100	68414000	6763700	0	6494200	71015000	29315000	26597000	4520900	0	76259000	560260000	317270	77707000	42942000	115160000	10676000	14295000	158460000	22757000	57426000	71703000	122860000	215220	722080000	12143000
Q13315	8	Serine-protein kinase ATM	ATM	sp|Q13315|ATM_HUMAN Serine-protein kinase ATM OS=Homo sapiens OX=9606 GN=ATM PE=1 SV=4	1435300000	287780000	60167000	312130000	266610000	211650000	37301000	244430000	62238000	451210000	648840000	75999000	402200000	2100400000	237320000	449850000	70069000	74343000	1093400000	208620000	416300000	39349000	167970000	952000000	74360000	79864000	47555000	3232300000	21819000	136920000	4177700000	54857000	326370000	1143400000	113160000	32829000	507460000	870470000	186630000	303640000	136640000	979750000	414200000	49639000	389230000
O94823;A0A2R8YDI5	4	Probable phospholipid-transporting ATPase VB	ATP10B	sp|O94823|AT10B_HUMAN Probable phospholipid-transporting ATPase VB OS=Homo sapiens OX=9606 GN=ATP10B PE=2 SV=2;tr|A0A2R8YDI5|A0A2R8YDI5_HUMAN Isoform of O94823, Phospholipid-transporting ATPase OS=Homo sapiens OX=9606 GN=ATP10B PE=1 SV=1	56393000	2141700000	248410000	30566000	38049000	248400000	23117000	459140000	12277000	1612200000	51686000	2007500000	226220000	3199200000	160560000	144080000	1151700000	84571000	370300000	123660000	4697600	434770000	1424500000	83179000	12087000	0	377540000	100210000	1722900	257200000	268030000	15093000	52317000	50743000	23552000	2656400000	17340000	68644000	94020000	71939000	257680000	111270000	20338000	0	18935000
Q9P241;Q9P241-2	4	Probable phospholipid-transporting ATPase VD	ATP10D	sp|Q9P241|AT10D_HUMAN Probable phospholipid-transporting ATPase VD OS=Homo sapiens OX=9606 GN=ATP10D PE=2 SV=3;sp|Q9P241-2|AT10D-2_HUMAN Isoform of Q9P241, Isoform 2 of Probable phospholipid-transporting ATPase VD OS=Homo sapiens OX=9606 GN=ATP10D PE=2 SV=	88170000	93115000	3324500	0	173060000	0	124530000	1321400	0	15669000	21876000	26841000	253550000	79623000	275470000	48066000	17995000	2758200	1040400000	73871000	4232500	26919000	290030000	15436000	2146100	229860000	4543000	389910000	4913800	1621000000	303210000	8247000	27210000	990440000	162560	48712000	88907000	4138100000	1797700000	0	54929000	1164800	15920000	2761100	14061000
P54707;P54707-2	2	Potassium-transporting ATPase alpha chain 2	ATP12A	sp|P54707|AT12A_HUMAN Potassium-transporting ATPase alpha chain 2 OS=Homo sapiens OX=9606 GN=ATP12A PE=1 SV=3;sp|P54707-2|AT12A-2_HUMAN Isoform of P54707, Isoform 2 of Potassium-transporting ATPase alpha chain 2 OS=Homo sapiens OX=9606 GN=ATP12A PE=1 SV=3	90658000	14530000	15934000	73710000	23334000	29778000	14602000	89273000	664280	75482000	21754000	47471000	88351000	15116000	101240000	13901000	11070000	2096300	101440000	25785000	0	322360000	695540	50894000	25566000	194100000	2721000	135110000	356240	379450000	170410000	410450	156480000	38728000	61905000	113870000	58978000	964390	58489000	40468000	552610	1593100000	38185000	0	25939000
Q9HD20;Q9HD20-2	3	Manganese-transporting ATPase 13A1	ATP13A1	sp|Q9HD20|AT131_HUMAN Manganese-transporting ATPase 13A1 OS=Homo sapiens OX=9606 GN=ATP13A1 PE=1 SV=2;sp|Q9HD20-2|AT131-2_HUMAN Isoform of Q9HD20, Isoform B of Manganese-transporting ATPase 13A1 OS=Homo sapiens OX=9606 GN=ATP13A1 PE=1 SV=2	2740000	3038900	0	65608000	0	0	0	0	3247800	23045000000	0	7572700	15728000	137760000	0	10973000	0	0	28921000	0	0	0	0	0	9062200	897350	0	681540000	0	137760000	221740000	0	12467000	0	119920000	0	0	125100000	36634000	0	28713000	72015000	0	3136700	1050500
B7WPN9;Q4VNC1;Q4VNC1-2	7	Probable cation-transporting ATPase 13A4	ATP13A4	tr|B7WPN9|B7WPN9_HUMAN Isoform of Q4VNC1, Cation-transporting ATPase OS=Homo sapiens OX=9606 GN=ATP13A4 PE=1 SV=1;sp|Q4VNC1|AT134_HUMAN Probable cation-transporting ATPase 13A4 OS=Homo sapiens OX=9606 GN=ATP13A4 PE=2 SV=3;sp|Q4VNC1-2|AT134-2_HUMAN Isoform	2255900000	245300000	6673400000	809640000	65568000	0	477160000	41511000	0	94743000	43519000	427940	25019000	73449000	128220000	153300000	818200000	2543500	152270000	20520000	36590000	11775000	139150000	8296800	17986000	37644000	8572200	24904000000	18635000	14810000	111010000	263880	61153000	9901600	22826000	279030000	593490	66558000	40281000	244470000000	187330000	21758000	15268000	41140000	136390
P05023-4;P05023;P05023-3;P05023-2	7	Sodium/potassium-transporting ATPase subunit alpha-1	ATP1A1	sp|P05023-4|AT1A1-4_HUMAN Isoform of P05023, Isoform 4 of Sodium/potassium-transporting ATPase subunit alpha-1 OS=Homo sapiens OX=9606 GN=ATP1A1 PE=1 SV=1;sp|P05023|AT1A1_HUMAN Sodium/potassium-transporting ATPase subunit alpha-1 OS=Homo sapiens OX=9606 GN	24048000000	17822000000	5475800000	959290000	2671800000	1010300000	3659100000	14514000000	4937800000	18408000000	1005100000	9339000000	3715300000	10964000000	10878000000	1377600000	599770000	637470000	34206000000	5577400000	55891000	7110200000	1187200000	5755500000	615800000	2405800000	846270000	9207200000	691750000	13528000000	16940000000	288870000	5356200000	3494700000	1519200000	3221600000	2919000000	7447600000	2236300000	2300900000	4687100000	47686000000	1286900000	343010000	1069300000
B1AKY9;P50993;H0Y7C1	3	Sodium/potassium-transporting ATPase subunit alpha-2	ATP1A2	tr|B1AKY9|B1AKY9_HUMAN Isoform of P50993, Sodium/potassium-transporting ATPase subunit alpha OS=Homo sapiens OX=9606 GN=ATP1A2 PE=1 SV=1;sp|P50993|AT1A2_HUMAN Sodium/potassium-transporting ATPase subunit alpha-2 OS=Homo sapiens OX=9606 GN=ATP1A2 PE=1 SV=1;	50359000000	38069000000	6228100000	6149200000	14022000000	2674800000	9314200000	52193000000	9500900000	11938000000	4545800000	17925000000	12129000000	43684000000	42598000000	4564900000	1921900000	2067100000	98604000000	28082000000	304730000	17847000000	4568600000	6759100000	4912600000	7092400000	3446800000	21337000000	11474000000	67378000000	110600000000	787730000	21643000000	12199000000	12894000000	12691000000	10920000000	31077000000	5007200000	15564000000	24873000000	157810000000	2931100000	1855700000	6382300000
M0R116;P13637;P13637-2;P13637-3;A0A2R8YEY8;A0A0A0MT26	7	Sodium/potassium-transporting ATPase subunit alpha-3	ATP1A3	tr|M0R116|M0R116_HUMAN Isoform of P13637, Sodium/potassium-transporting ATPase subunit alpha OS=Homo sapiens OX=9606 GN=ATP1A3 PE=1 SV=1;sp|P13637|AT1A3_HUMAN Sodium/potassium-transporting ATPase subunit alpha-3 OS=Homo sapiens OX=9606 GN=ATP1A3 PE=1 SV=3;	43147000000	27139000000	5256900000	2908700000	3616100000	1809600000	4882200000	33096000000	6968500000	7902900000	1686500000	13032000000	8205700000	19405000000	30576000000	2516100000	1006900000	1008400000	58805000000	17942000000	132990000	7470400000	1759000000	3386900000	1085500000	4255200000	1346900000	17570000000	932290000	37643000000	33862000000	369360000	9425200000	8316200000	5483400000	5845000000	2904700000	11631000000	3388500000	5218700000	10638000000	86225000000	2834000000	331810000	1720600000
Q13733	2	Sodium/potassium-transporting ATPase subunit alpha-4	ATP1A4	sp|Q13733|AT1A4_HUMAN Sodium/potassium-transporting ATPase subunit alpha-4 OS=Homo sapiens OX=9606 GN=ATP1A4 PE=1 SV=3	431690000	616620000	125250000	85088000	186300000	26802000	174200000	1685400000	197130000	270820000	862350000	254090000	85014000	470790000	390310000	64106000	119830000	156060000	784550000	805490000	59094000	106100000	62629000	121550000	123690000	76118000	128850000	287030000	180090000	839280000	994280000	100320000	238140000	55119000	294590000	188720000	112110000	266870000	42987000	417190000	132650000	2237800000	46763000	47036000	102040000
P05026-2;P05026	2	Sodium/potassium-transporting ATPase subunit beta-1	ATP1B1	sp|P05026-2|AT1B1-2_HUMAN Isoform of P05026, Isoform 2 of Sodium/potassium-transporting ATPase subunit beta-1 OS=Homo sapiens OX=9606 GN=ATP1B1 PE=1 SV=1;sp|P05026|AT1B1_HUMAN Sodium/potassium-transporting ATPase subunit beta-1 OS=Homo sapiens OX=9606 GN=A	14758000000	21450000000	3431000000	1632200000	1746000000	1293300000	1595100000	11530000000	300930000	4912800000	1252000000	9259000000	1198900000	10877000000	8672600000	2396800000	542640000	401520000	34742000000	3995300000	82296000	4227500000	830650000	1836400000	654970000	4551300000	968650000	9828900000	250760000	13747000000	15737000000	346960000	3408200000	3223600000	1942500000	3277200000	992930000	6632500000	1171400000	2063400000	5482900000	39258000000	1534800000	236950000	1268800000
P14415	3	Sodium/potassium-transporting ATPase subunit beta-2	ATP1B2	sp|P14415|AT1B2_HUMAN Sodium/potassium-transporting ATPase subunit beta-2 OS=Homo sapiens OX=9606 GN=ATP1B2 PE=1 SV=3	1492000000	1383700000	153300000	39975000	127900000	124010000	362820000	980500000	3109400	175030000	187970000	1695600000	443700000	1294500000	1243100000	16556000	56126000	14007000	1241200000	260440000	13657000	320070000	110650000	454900000	196540000	160710000	169390000	154550000	10255000	1655100000	2397300000	17813000	82119000	87223000	389770000	246000000	2497500000	789750000	1572900000	242350000	3431900000	10903000000	8448700	64375000	280230000
P54709	4	Sodium/potassium-transporting ATPase subunit beta-3	ATP1B3	sp|P54709|AT1B3_HUMAN Sodium/potassium-transporting ATPase subunit beta-3 OS=Homo sapiens OX=9606 GN=ATP1B3 PE=1 SV=1	148890000	522320000	71739000	196540000	1062500000	39330000	44857000	1429700000	2059800	659310000	17309000	251400000	57148000	482580000	301550000	21594000	38678000	87034000	6707500000	71415000	11793000	455320000	39166000	14327000	326560000	92184000	21813000	207940000	27316000	714530000	7861100000	11737000	1322000000	165910000	71755000	527810000	254220000	729410000	118680000	726960000	181030000	1323500000	124500000	95086000	273050000
O14983-2;O14983;O14983-3	4	Sarcoplasmic/endoplasmic reticulum calcium ATPase 1	ATP2A1	sp|O14983-2|AT2A1-2_HUMAN Isoform of O14983, Isoform SERCA1A of Sarcoplasmic/endoplasmic reticulum calcium ATPase 1 OS=Homo sapiens OX=9606 GN=ATP2A1 PE=2 SV=1;sp|O14983|AT2A1_HUMAN Sarcoplasmic/endoplasmic reticulum calcium ATPase 1 OS=Homo sapiens OX=960	28896000	37496000	12713000	2357200	651730	983940	69558000	1897900	795180	39179000	661250	2383900	305310000	963800000	17600000	20587000	84232000	0	299500000	4837500	0	45144000	11877000	8810500	14882000	12389000	0	11641000	1888900	0	158730000	0	15426000	34021000	3273200	3093800	38769000	4502100	11253000	274510	19475000	36259000	4791700	19323000	21114000
P16615;P16615-5;P16615-2;P16615-3;P16615-4;H7C5W9	8	Sarcoplasmic/endoplasmic reticulum calcium ATPase 2	ATP2A2	sp|P16615|AT2A2_HUMAN Sarcoplasmic/endoplasmic reticulum calcium ATPase 2 OS=Homo sapiens OX=9606 GN=ATP2A2 PE=1 SV=1;sp|P16615-5|AT2A2-5_HUMAN Isoform of P16615, Isoform 5 of Sarcoplasmic/endoplasmic reticulum calcium ATPase 2 OS=Homo sapiens OX=9606 GN=A	8516200000	727350000	410760000	3860000000	513120000	2457400000	170500000	2306400000	663720000	2178400000	289070000	894600000	1238500000	2890000000	1716500000	625050000	466220000	190430000	4103100000	155150000	63562000	999440000	175910000	396180000	380780000	792170000	440150000	204350000	1006600000	3355400000	4536500000	51100000	1101500000	534210000	1672200000	642920000	1602300000	2736900000	772950000	863610000	2316000000	7140200000	388290000	2077400000	194070000
P20020-4;P20020-1;P20020-5;P20020-2;P20020-6;P20020;E7ERY9	10	Plasma membrane calcium-transporting ATPase 1;Calcium-transporting ATPase	ATP2B1	sp|P20020-4|AT2B1-4_HUMAN Isoform of P20020, Isoform C of Plasma membrane calcium-transporting ATPase 1 OS=Homo sapiens OX=9606 GN=ATP2B1 PE=1 SV=4;sp|P20020-1|AT2B1-1_HUMAN Isoform of P20020, Isoform D of Plasma membrane calcium-transporting ATPase 1 OS=H	203690000	198430000	75188000	27396000	77485000	26719000	399740000	829840000	40968000	83819000	51578000	266810000	255710000	437510000	310520000	39322000	38901000	89491000	3291400000	21706000	47183000	127080000	64700000	159070000	85006000	81116000	73256000	5262700	10096000	786950000	1079200000	129210000	107460000	132990000	116710000	207990000	1865100000	2425900000	81833000	18967000	193110000	1532600000	246450000	4288700	51538000
A0A2U3U055;A0A2U3TZI3;Q01814-4;Q01814-7;Q01814-3;Q01814-2	7	Plasma membrane calcium-transporting ATPase 2	ATP2B2	tr|A0A2U3U055|A0A2U3U055_HUMAN Isoform of Q01814, Calcium-transporting ATPase OS=Homo sapiens OX=9606 GN=ATP2B2 PE=1 SV=1;tr|A0A2U3TZI3|A0A2U3TZI3_HUMAN Isoform of Q01814, Calcium-transporting ATPase OS=Homo sapiens OX=9606 GN=ATP2B2 PE=1 SV=1;sp|Q01814-4|	1554100000	1415100000	250500000	131290000	90117000	35576000	195050000	2156500000	192870000	440590000	31857000	795860000	115280000	2053500000	710800000	185060000	14185000	25783000	3137100000	353010000	26136000	192170000	92219000	142020000	147760000	124970000	24258000	271770000	18511000	747320000	2049700000	7249700	578640000	361160000	76075000	523340000	185180000	505290000	318190000	81954000	210520000	2207000000	114580000	4888800	63708000
Q01814-6;Q01814-8;Q01814-5;Q01814;H0Y7S3;A0A2R8Y4R4	6	Plasma membrane calcium-transporting ATPase 2	ATP2B2	sp|Q01814-6|AT2B2-6_HUMAN Isoform of Q01814, Isoform ZB of Plasma membrane calcium-transporting ATPase 2 OS=Homo sapiens OX=9606 GN=ATP2B2 PE=1 SV=2;sp|Q01814-8|AT2B2-8_HUMAN Isoform of Q01814, Isoform XB of Plasma membrane calcium-transporting ATPase 2 OS	141530000	64642000	14270000	0	0	0	0	165060000	11499000	0	3578000	219600000	0	60845000	68291000	8912700	0	0	383050000	9688300	0	26968000	10402000	107300000	0	4256000	0	3151400	0	81336000	187280000	654140	0	25401000	7049300	0	25589000	45601000	59497000	0	166230000	290810000	447170	0	3742800
Q16720-8;Q16720-7;Q16720-6;Q16720-3;Q16720-5;Q16720-2;Q16720-4;Q16720	8	Plasma membrane calcium-transporting ATPase 3	ATP2B3	sp|Q16720-8|AT2B3-8_HUMAN Isoform of Q16720, Isoform ZG of Plasma membrane calcium-transporting ATPase 3 OS=Homo sapiens OX=9606 GN=ATP2B3 PE=1 SV=3;sp|Q16720-7|AT2B3-7_HUMAN Isoform of Q16720, Isoform XG of Plasma membrane calcium-transporting ATPase 3 OS	79505000	71928000	21944000	19618000	29605000	4547700	5454800	280290000	30065000	2351500000	51864000	84427000	287050000	642400000	396470000	81530000	3685500	1953000	359380000	5500700	35246000	79700000	16698000	40710000	14407000	103600000	24314000	86135000	5747900	4593200000	186760000	1991700	300410000	200060000	42420000	41495000	69229000	483730000	275270000	53653000	163490000	841130000	31763000	5850200	20172000
P23634-8;P23634;P23634-7;P23634-6	5	Plasma membrane calcium-transporting ATPase 4	ATP2B4	sp|P23634-8|AT2B4-8_HUMAN Isoform of P23634, Isoform ZD of Plasma membrane calcium-transporting ATPase 4 OS=Homo sapiens OX=9606 GN=ATP2B4 PE=1 SV=2;sp|P23634|AT2B4_HUMAN Plasma membrane calcium-transporting ATPase 4 OS=Homo sapiens OX=9606 GN=ATP2B4 PE=1	4552000000	1859100000	487560000	165610000	327540000	87020000	282390000	6057000000	346810000	1508700000	121310000	1856300000	2628600000	1462800000	3646000000	351610000	81901000	62539000	5342000000	341080000	22551000	780130000	287880000	633070000	293940000	545280000	178900000	988310000	350040000	2813600000	8320700000	93536000	741630000	469020000	330190000	1101200000	419890000	1414800000	341660000	472950000	1315900000	6844100000	296750000	321880000	195920000
B4E2Q0;P98194-8;P98194-7;H0Y9V7;P98194-2;P98194-4;P98194;P98194-3;P98194-5;P98194-9;P98194-6	13	Calcium-transporting ATPase;Calcium-transporting ATPase type 2C member 1	ATP2C1	tr|B4E2Q0|B4E2Q0_HUMAN Isoform of P98194, Calcium-transporting ATPase OS=Homo sapiens OX=9606 GN=ATP2C1 PE=1 SV=1;sp|P98194-8|AT2C1-8_HUMAN Isoform of P98194, Isoform 8 of Calcium-transporting ATPase type 2C member 1 OS=Homo sapiens OX=9606 GN=ATP2C1 PE=1	83349000	42708000	24654000	11031000	12351000	21671000	6990300	78747000	422490	33236000	3530700	37739000	76771000	1001100	78151000	10720000	5327200	4462900	8624600	3647300	3984500	4578600	6145600	3601100	31049000	91385000	7334300	2422900	0	0	287480000	605660	37915000	6655900	4371100	42004000	17573000	39072000	43314000	16859000	108870000	41663000	34479000	16959000	19868000
P20648	1	Potassium-transporting ATPase alpha chain 1	ATP4A	sp|P20648|ATP4A_HUMAN Potassium-transporting ATPase alpha chain 1 OS=Homo sapiens OX=9606 GN=ATP4A PE=2 SV=5	1027500000	219890000	160080000	195680000	346680000	3055000	2964100	316570000	26617000	51277000	137680000	119260000	297320000	504770000	2520500000	305740000	99891000	78375000	5152400000	347220000	1368500	304490000	14755000	196800000	106360000	374630000	39938000	1097500000	79349000	187630000	4953800000	36872000	797410000	844280000	585580000	37547000	397650000	200630000	574150000	595930000	202400000	2669500000	239350000	52827000	209810000
P25705;P25705-2;K7EK77	7	ATP synthase subunit alpha, mitochondrial	ATP5A1	sp|P25705|ATPA_HUMAN ATP synthase subunit alpha, mitochondrial OS=Homo sapiens OX=9606 GN=ATP5F1A PE=1 SV=1;sp|P25705-2|ATPA-2_HUMAN Isoform of P25705, Isoform 2 of ATP synthase subunit alpha, mitochondrial OS=Homo sapiens OX=9606 GN=ATP5F1A PE=1 SV=1;tr|K	17699000000	45824000000	9892300000	11387000000	10276000000	4332800000	3039300000	47621000000	560310000	24479000000	7394500000	38092000000	8351900000	41392000000	18691000000	9449600000	3857100000	2873100000	121050000000	6914900000	1030600000	14029000000	3949000000	4617800000	5370400000	18714000000	3547800000	28299000000	1319600000	49727000000	127260000000	2049400000	29739000000	14100000000	5074200000	14145000000	11323000000	27998000000	11885000000	5986200000	21577000000	98453000000	6245900000	2337100000	3952300000
P06576;H0YH81	3	ATP synthase subunit beta, mitochondrial;ATP synthase subunit beta	ATP5B	sp|P06576|ATPB_HUMAN ATP synthase subunit beta, mitochondrial OS=Homo sapiens OX=9606 GN=ATP5F1B PE=1 SV=3;tr|H0YH81|H0YH81_HUMAN Isoform of P06576, ATP synthase subunit beta (Fragment) OS=Homo sapiens OX=9606 GN=ATP5F1B PE=1 SV=1	92193000000	116380000000	24666000000	20987000000	23094000000	6439400000	7947800000	62621000000	1099400000	35285000000	7992300000	91623000000	8219400000	74350000000	65986000000	20282000000	5580700000	4059100000	317220000000	32189000000	1671400000	35877000000	18096000000	10285000000	9520000000	34726000000	5582000000	127620000000	5130100000	125110000000	157190000000	4566200000	110250000000	23525000000	10720000000	41545000000	10250000000	62401000000	13581000000	16738000000	32145000000	156930000000	12217000000	4971100000	9166500000
P36542-2;P36542	2	ATP synthase subunit gamma, mitochondrial	ATP5C1	sp|P36542-2|ATPG-2_HUMAN Isoform of P36542, Isoform Heart of ATP synthase subunit gamma, mitochondrial OS=Homo sapiens OX=9606 GN=ATP5F1C PE=1 SV=1;sp|P36542|ATPG_HUMAN ATP synthase subunit gamma, mitochondrial OS=Homo sapiens OX=9606 GN=ATP5F1C PE=1 SV=1	75462000	674560000	140610000	193900000	271260000	41052000	99090000	551200000	0	671350000	35149000	530520000	215990000	618210000	220260000	236000000	69084000	19220000	2564300000	28365000	5976800	331830000	7062300	213250000	90974000	545180000	55456000	226860000	305820000	1113000000	3022800000	11261000	654530000	120200000	321970000	104980000	284490000	1616100000	119370000	371150000	531530000	2993800000	77944000	64287000	41658000
P30049	1	ATP synthase subunit delta, mitochondrial	ATP5D	sp|P30049|ATPD_HUMAN ATP synthase subunit delta, mitochondrial OS=Homo sapiens OX=9606 GN=ATP5F1D PE=1 SV=2	60759000	18346000	1811700	14811000	13175000	679120	1500800	103560000	1149200	14647000	12312000	8349300	10800000	77083000	151790000	20496000	2453000	3556200	93057000	26424000	1237400	7847800	329580	25563000	45527000	8350000	7321800	119660000	2807800	150110000	427530000	0	178610000	2142000	68535000	4669900	7880200	216300000	7069200	16589000	18016000	223470000	983430	7404300	1949200
P24539;Q5QNZ2	2	ATP synthase F(0) complex subunit B1, mitochondrial	ATP5F1	sp|P24539|AT5F1_HUMAN ATP synthase F(0) complex subunit B1, mitochondrial OS=Homo sapiens OX=9606 GN=ATP5PB PE=1 SV=2;tr|Q5QNZ2|Q5QNZ2_HUMAN Isoform of P24539, ATP synthase F(0) complex subunit B1, mitochondrial OS=Homo sapiens OX=9606 GN=ATP5PB PE=1 SV=1	99368000	290380000	10914000	167780000	146710000	10989000	19730000	229230000	0	116090000	4637100	122150000	32183000	558740000	425650000	73452000	36281000	14749000	1498200000	913770	8286600	23007000	47838000	33763000	48569000	26898000	635670	26555000	3287300	828810000	2096000000	1417900	261180000	23277000	148700000	22153000	261420000	578720000	27448000	103560000	396890000	1877100000	49666000	26862000	41289000
O75947;O75947-2;F5H608	3	ATP synthase subunit d, mitochondrial	ATP5H	sp|O75947|ATP5H_HUMAN ATP synthase subunit d, mitochondrial OS=Homo sapiens OX=9606 GN=ATP5PD PE=1 SV=3;sp|O75947-2|ATP5H-2_HUMAN Isoform of O75947, Isoform 2 of ATP synthase subunit d, mitochondrial OS=Homo sapiens OX=9606 GN=ATP5PD PE=1 SV=3;tr|F5H608|F5	129400000	111270000	6737700	174160000	45638000	8031000	17727000	69850000	0	74108000	34857000	24978000	30929000	260220000	106810000	63278000	8401000	15307000	505530000	21666000	7891500	5020400	14934000	6950600	11355000	25385000	9573800	39466000	2357000	849800000	1131800000	90522	175250000	33977000	152770000	358840000	31779000	661950000	36368000	48961000	112520000	799900000	3364600	1385300	16444000
P56385	1	ATP synthase subunit e, mitochondrial	ATP5I	sp|P56385|ATP5I_HUMAN ATP synthase subunit e, mitochondrial OS=Homo sapiens OX=9606 GN=ATP5ME PE=1 SV=2	6046800	4331700	8066900	0	6077700	0	2433400	21181000	0	15127000	0	133910000	5885800	0	0	40345000	0	0	35042000	5892200	0	0	0	0	0	4942200	0	0	0	7469400	0	0	0	0	35756000	0	5049500	2032200	696780	0	0	34988000	2602000	0	965900
G3V325;C9JJT5;C9JU26;P56134-4;P56134-3;P56134-2;P56134;O75127	9	ATP synthase subunit f, mitochondrial;Pentatricopeptide repeat-containing protein 1, mitochondrial	ATP5J2-PTCD1;ATP5J2;PTCD1	tr|G3V325|G3V325_HUMAN ATP5MF-PTCD1 readthrough OS=Homo sapiens OX=9606 GN=ATP5MF-PTCD1 PE=4 SV=1;tr|C9JJT5|C9JJT5_HUMAN Isoform of G3V325, ATP5MF-PTCD1 readthrough OS=Homo sapiens OX=9606 GN=ATP5MF-PTCD1 PE=4 SV=2;tr|C9JU26|C9JU26_HUMAN Isoform of P56134,	24330000	10899000	4287200	21318000	7328100	2794900	19313000	76735000	0	171470000	290020	13281000	43261000	36094000	79565000	5914100	4634700	0	103900000	16162000	0	4386500	1364100	0	2080000	4448300	1866200	47502000	0	83990000	373500000	0	37539000	6878500	26967000	0	6490300	95921000	9595400	0	55231000	102850000	315660	74648000	2960100
E9PN17;A0A3B3ITX4;O75964	4	ATP synthase subunit g, mitochondrial	ATP5L	tr|E9PN17|E9PN17_HUMAN Isoform of O75964, ATP synthase subunit g, mitochondrial OS=Homo sapiens OX=9606 GN=ATP5MG PE=1 SV=1;tr|A0A3B3ITX4|A0A3B3ITX4_HUMAN Isoform of A0A3B3ITZ1, Uncharacterized protein OS=Homo sapiens OX=9606 PE=4 SV=1;sp|O75964|ATP5L_HUMA	27911000	39942000	50340000	21665000	82235000	2442600000	48928000	40363000	0	70577000	2047700000	22872000	116820000	218290000	441870000	51826000	11562000	4338700	420820000	12967000	1064000000	2877700000	8673100	10247000	12874000	74664000	30451000	20803000	0	11150000000	1011100000	1058300000	322190000	30772000	45517000	9291700	163410000	340890000	52101000	14080000	143600000	889340000	4805000000	0	1311200
P48047;A0A494C0K9;H7C0C1	5	ATP synthase subunit O, mitochondrial	ATP5O	sp|P48047|ATPO_HUMAN ATP synthase subunit O, mitochondrial OS=Homo sapiens OX=9606 GN=ATP5PO PE=1 SV=1;tr|A0A494C0K9|A0A494C0K9_HUMAN Isoform of P48047, ATP synthase subunit O, mitochondrial OS=Homo sapiens OX=9606 GN=ATP5PO PE=4 SV=1;tr|H7C0C1|H7C0C1_HUMA	103030000	486870000	31861000	120950000	153630000	44838000	39190000	549950000	0	194780000	73868000	176020000	1173400000	912760000	368650000	148120000	77838000	20471000	9380600000	56143000	18027000	349810000	5090700	38576000	112730000	394080000	31397000	3792700000	24868000	8643400000	2791700000	3997900	743980000	127860000	239410000	929330000	150710000	13253000000	52567000	252720000	946500000	3021300000	1770800000	11427000	45760000
Q99766;A0A2R8YDJ1	4	ATP synthase subunit s, mitochondrial	ATP5S	sp|Q99766|ATP5S_HUMAN ATP synthase subunit s, mitochondrial OS=Homo sapiens OX=9606 GN=DMAC2L PE=1 SV=3;tr|A0A2R8YDJ1|A0A2R8YDJ1_HUMAN Isoform of Q99766, ATP synthase subunit s, mitochondrial (Fragment) OS=Homo sapiens OX=9606 GN=DMAC2L PE=1 SV=1	4003300	233730000	912930	230180000	80559000	83355000	109600000	70224000	0	162430000	102580000	156100000	114990000	376690000	10567000	204440000	54891000	17603000	81544000	15299000	6382000	4041900	170820000	102270000	19056000	131160000	82370000	4472500	21691000	141810000	525140000	95552000	27211000	132160000	91561000	153890000	496400000	342250000	164240000	23060000	115280000	46523000	143750000	121610000	150150000
Q15904;A6NLC6;A0A0C4DGX8	7	V-type proton ATPase subunit S1	ATP6AP1	sp|Q15904|VAS1_HUMAN V-type proton ATPase subunit S1 OS=Homo sapiens OX=9606 GN=ATP6AP1 PE=1 SV=2;tr|A6NLC6|A6NLC6_HUMAN Isoform of Q15904, V-type proton ATPase subunit S1 (Fragment) OS=Homo sapiens OX=9606 GN=ATP6AP1 PE=1 SV=3;tr|A0A0C4DGX8|A0A0C4DGX8_HUM	91169000	334790000	25986000	2272200	64294000	2604100	4828500	227380000	0	152540000	35642000	116600000	515800000	1019000000	103670000	31534000	115960000	76959000	421880000	31705000	18495000	41805000	6620800	27698000	91246000	94698000	156950000	188030000	3197500	70731000	1240600000	0	221200000	82913000	132630000	795670000	195430000	736870000	371960000	322720000	342280000	388190000	446540000	306450000	83085000
Q93050-1;Q93050;Q93050-3;B7Z641;B7Z2A9	16	V-type proton ATPase 116 kDa subunit a isoform 1;V-type proton ATPase subunit a	ATP6V0A1	sp|Q93050-1|VPP1-1_HUMAN Isoform of Q93050, Isoform 2 of V-type proton ATPase 116 kDa subunit a isoform 1 OS=Homo sapiens OX=9606 GN=ATP6V0A1 PE=1 SV=3;sp|Q93050|VPP1_HUMAN V-type proton ATPase 116 kDa subunit a isoform 1 OS=Homo sapiens OX=9606 GN=ATP6V0A	2042100000	2326300000	246420000	229930000	1256900000	163210000	44922000	4490100000	224740000	1241800000	358680000	851750000	4953600000	4203400000	2242000000	480570000	1413700000	728460000	9102300000	113770000	103810000	625700000	153860000	287460000	650060000	911640000	2048900000	1894000000	79901000	1010100000	13302000000	75395000	1689400000	996380000	10394000000	2428600000	2308100000	7391500000	4083100000	329410000	4955700000	7435400000	3124500000	113720000	618750000
F5GYQ1;P61421;R4GN72;J3QL14	7	V-type proton ATPase subunit d 1	ATP6V0D1	tr|F5GYQ1|F5GYQ1_HUMAN Isoform of P61421, V-type proton ATPase subunit OS=Homo sapiens OX=9606 GN=ATP6V0D1 PE=1 SV=1;sp|P61421|VA0D1_HUMAN V-type proton ATPase subunit d 1 OS=Homo sapiens OX=9606 GN=ATP6V0D1 PE=1 SV=1;tr|R4GN72|R4GN72_HUMAN Isoform of P614	7447800000	11192000000	2011700000	580890000	1247700000	520760000	394450000	6939200000	43727000	3075400000	733590000	7264400000	1819200000	5776000000	6746100000	1474100000	1169800000	789410000	22870000000	2108300000	164480000	3397900000	1618100000	1763400000	927850000	4159000000	1831600000	7302800000	400560000	4103700000	21031000000	429300000	5288400000	3212800000	2144300000	4260100000	2308400000	10209000000	6375500000	1055900000	4422400000	18021000000	3632800000	473410000	764640000
Q8N8Y2	1	V-type proton ATPase subunit d 2	ATP6V0D2	sp|Q8N8Y2|VA0D2_HUMAN V-type proton ATPase subunit d 2 OS=Homo sapiens OX=9606 GN=ATP6V0D2 PE=2 SV=1	852310000	694970000	641950	57179000	32303000	35652000	8280100	616230000	1390000	416140000	15383000	410660000	93007000	70627000	487230000	67836000	22724000	31509000	1100200000	0	0	59617000	91201000	5141600	27154000	352520000	8898500	595030000	3136700	242530000	1472100000	152070	111960000	49314000	55342000	142120000	21676000	744750000	155320000	20416000	189820000	717700000	24917000	76655000	52093000
P38606	2	V-type proton ATPase catalytic subunit A	ATP6V1A	sp|P38606|VATA_HUMAN V-type proton ATPase catalytic subunit A OS=Homo sapiens OX=9606 GN=ATP6V1A PE=1 SV=2	149960000000	99941000000	18125000000	23839000000	31929000000	26300000000	25427000000	88303000000	41884000000	61366000000	30132000000	108060000000	71578000000	150040000000	108670000000	29477000000	10278000000	12843000000	177000000000	19511000000	3391700000	75196000000	48478000000	41199000000	19455000000	40002000000	18991000000	68926000000	8856000000	132000000000	246770000000	6355900000	90502000000	41955000000	12748000000	36978000000	35864000000	79920000000	43820000000	9122500000	58728000000	221900000000	16152000000	26989000000	21838000000
C9JL73;P15313;C9JNS9	4	V-type proton ATPase subunit B, kidney isoform	ATP6V1B1	tr|C9JL73|C9JL73_HUMAN Isoform of P15313, V-type proton ATPase subunit B, kidney isoform OS=Homo sapiens OX=9606 GN=ATP6V1B1 PE=1 SV=1;sp|P15313|VATB1_HUMAN V-type proton ATPase subunit B, kidney isoform OS=Homo sapiens OX=9606 GN=ATP6V1B1 PE=1 SV=3;tr|C9J	721540000	181020000	22309000	43908000	115570000	12174000	0	83130000	0	15601000	38732000	225670000	76304000	7563600000	803600000	43672000	18462000	91758000	892880000	1246500	0	288610000	80464000	42835000	326210000	642390000	26261000	188220000	0	2036400000	1022800000	31580000	224190000	0	689870	280330000	0	20135000	162830000	0	2543600	181700000	55464000	0	90038000
P21281	5	V-type proton ATPase subunit B, brain isoform	ATP6V1B2	sp|P21281|VATB2_HUMAN V-type proton ATPase subunit B, brain isoform OS=Homo sapiens OX=9606 GN=ATP6V1B2 PE=1 SV=3	93436000000	113940000000	21443000000	32129000000	31101000000	30605000000	28559000000	54885000000	6774800000	65893000000	41764000000	134640000000	26850000000	138080000000	66562000000	51667000000	14142000000	12042000000	163070000000	23632000000	9094400000	59637000000	53406000000	35529000000	21126000000	62019000000	27764000000	63279000000	8415900000	102050000000	188450000000	11258000000	72784000000	52470000000	16679000000	45094000000	35976000000	75413000000	55567000000	8939000000	53453000000	194120000000	24345000000	25081000000	24423000000
P21283	1	V-type proton ATPase subunit C 1	ATP6V1C1	sp|P21283|VATC1_HUMAN V-type proton ATPase subunit C 1 OS=Homo sapiens OX=9606 GN=ATP6V1C1 PE=1 SV=4	19819000000	23363000000	3173200000	5399900000	5932800000	7566300000	7649900000	4937200000	180210000	9264400000	8381900000	18633000000	5762400000	23456000000	17272000000	5823700000	2597300000	2351000000	11235000000	4901700000	759890000	10362000000	12016000000	10240000000	1893400000	6843600000	5884100000	20138000000	1686100000	6815700000	51208000000	1871300000	7928700000	10312000000	3077900000	10224000000	6244400000	15347000000	12340000000	611720000	15136000000	27643000000	5144200000	4770200000	6205000000
Q9Y5K8;G3V2S6;G3V2V6;H0YJH8;G3V559	10	V-type proton ATPase subunit D	ATP6V1D	sp|Q9Y5K8|VATD_HUMAN V-type proton ATPase subunit D OS=Homo sapiens OX=9606 GN=ATP6V1D PE=1 SV=1;tr|G3V2S6|G3V2S6_HUMAN Isoform of Q9Y5K8, V-type proton ATPase subunit D OS=Homo sapiens OX=9606 GN=ATP6V1D PE=1 SV=1;tr|G3V2V6|G3V2V6_HUMAN Isoform of Q9Y5K8,	3965400000	10682000000	1476900000	2062300000	2621300000	1755900000	2260400000	2880800000	103050000	4453600000	2666300000	6787900000	5518800000	12266000000	6955400000	6345500000	1495800000	743150000	11092000000	2448000000	592190000	8998500000	4188600000	2818900000	1087600000	7056600000	3892000000	7564100000	854670000	23139000000	24716000000	1242600000	18328000000	29023000000	4398400000	2514600000	4215200000	3431600000	5075400000	937690000	9018100000	25774000000	3365100000	2911400000	4979100000
P36543;C9J8H1	2	V-type proton ATPase subunit E 1	ATP6V1E1	sp|P36543|VATE1_HUMAN V-type proton ATPase subunit E 1 OS=Homo sapiens OX=9606 GN=ATP6V1E1 PE=1 SV=1;tr|C9J8H1|C9J8H1_HUMAN Isoform of P36543, V-type proton ATPase subunit E 1 (Fragment) OS=Homo sapiens OX=9606 GN=ATP6V1E1 PE=1 SV=1	8364800000	12112000000	3153000000	3742900000	6832800000	4165200000	4697200000	6499400000	167790000	10283000000	4388700000	19303000000	4380500000	20231000000	9638300000	7705100000	1802100000	979310000	11405000000	3079900000	593700000	5524800000	7967800000	6306600000	1734700000	10518000000	7920300000	7196800000	1076200000	10777000000	16738000000	1556500000	4445700000	6054700000	2241100000	1890800000	3130900000	8895900000	6050800000	1132800000	9077500000	30452000000	3399500000	4665500000	6381600000
Q16864;Q16864-2	2	V-type proton ATPase subunit F	ATP6V1F	sp|Q16864|VATF_HUMAN V-type proton ATPase subunit F OS=Homo sapiens OX=9606 GN=ATP6V1F PE=1 SV=2;sp|Q16864-2|VATF-2_HUMAN Isoform of Q16864, Isoform 2 of V-type proton ATPase subunit F OS=Homo sapiens OX=9606 GN=ATP6V1F PE=1 SV=2	104060000	84212000	90849000	42695000	39740000	31173000	17815000	55629000	0	55505000	17953000	85437000	75078000	300550000	108600000	289500000	62289000	6094300	61615000	112480000	10077000	135760000	85605000	33423000	9820100	12107000	48846000	434940000	22996000	1218900000	1016100000	24874000	111910000	121480000	61027000	117890000	169800000	139770000	101200000	3004600	45526000	345330000	64223000	124890000	21629000
O75348	1	V-type proton ATPase subunit G 1	ATP6V1G1	sp|O75348|VATG1_HUMAN V-type proton ATPase subunit G 1 OS=Homo sapiens OX=9606 GN=ATP6V1G1 PE=1 SV=3	166910000	119070000	26476000	171170000	61521000	96650000	39907000	100770000	0	159840000	82447000	280730000	951780000	826390000	225360000	223240000	40131000	21719000	449030000	136250000	31978000	19050000	105670000	120450000	191210000	56843000	88926000	356800000	64088000	402310000	554200000	28907000	222830000	441980000	109250000	65631000	192440000	336710000	162940000	28674000	5190100000	709040000	92533000	69600000	52896000
O95670;H0Y474;O95670-3;F2Z307	5	V-type proton ATPase subunit G 2	ATP6V1G2;ATP6V1G2-DDX39B	sp|O95670|VATG2_HUMAN V-type proton ATPase subunit G 2 OS=Homo sapiens OX=9606 GN=ATP6V1G2 PE=1 SV=1;tr|H0Y474|H0Y474_HUMAN Isoform of O95670, V-type proton ATPase subunit G (Fragment) OS=Homo sapiens OX=9606 GN=ATP6V1G2 PE=1 SV=1;sp|O95670-3|VATG2-3_HUMAN	463250000	239500000	32980000	44244000	54637000	73420000	50892000	103070000	0	146150000	185870000	353270000	113350000	396190000	228150000	258020000	45420000	3054600	134150000	50533000	11711000	22107000	137060000	181860000	6726100	155100000	205450000	140420000	31744000	155370000	669330000	58173000	45751000	105760000	117410000	16935000	59548000	105320000	76071000	4579400	43066000	878090000	55265000	128910000	68634000
Q9UI12-2	1	V-type proton ATPase subunit H	ATP6V1H	sp|Q9UI12-2|VATH-2_HUMAN Isoform of Q9UI12, Isoform 2 of V-type proton ATPase subunit H OS=Homo sapiens OX=9606 GN=ATP6V1H PE=1 SV=1	11314000000	26280000000	3082300000	8763800000	5087100000	5131500000	4002100000	7600900000	826700000	15556000000	8067000000	19907000000	8827300000	38143000000	13069000000	8056900000	3043200000	2220200000	28364000000	2843900000	1117400000	10229000000	11712000000	8224300000	3096600000	13357000000	4586000000	7400500000	1153000000	18037000000	40143000000	2271200000	9640900000	11774000000	15806000000	9452300000	8326500000	14040000000	10517000000	2615500000	11935000000	35663000000	4103000000	4876700000	5714700000
Q04656;Q04656-2;Q04656-3;Q04656-5	5	Copper-transporting ATPase 1	ATP7A	sp|Q04656|ATP7A_HUMAN Copper-transporting ATPase 1 OS=Homo sapiens OX=9606 GN=ATP7A PE=1 SV=4;sp|Q04656-2|ATP7A-2_HUMAN Isoform of Q04656, Isoform 1 of Copper-transporting ATPase 1 OS=Homo sapiens OX=9606 GN=ATP7A PE=1 SV=4;sp|Q04656-3|ATP7A-3_HUMAN Isofor	8443600	122950000	0	372360	90476000	36270000	0	301630000	9268100	63265000	9959300	38195000	746330000	334290000	14703000	1649000	10354000	493380	166920000	0	0	122940000	517780	87921000	90829000	135160000	7158000	816430	5277300	103160000	20322000	53298000	551490000	26254000	13793000	39464000	142670000	1437200000	3798600	54276000	107000000	82641000	9587100	58430000	988340
Q9Y2Q0;Q9Y2Q0-2	6	Phospholipid-transporting ATPase IA	ATP8A1	sp|Q9Y2Q0|AT8A1_HUMAN Phospholipid-transporting ATPase IA OS=Homo sapiens OX=9606 GN=ATP8A1 PE=1 SV=1;sp|Q9Y2Q0-2|AT8A1-2_HUMAN Isoform of Q9Y2Q0, Isoform 2 of Phospholipid-transporting ATPase IA OS=Homo sapiens OX=9606 GN=ATP8A1 PE=1 SV=1	602620000	359260000	42256000	1538900000	99165000	185340000	157260000	996880000	0	158500000	78028000	165100000	3176800000	899140000	574780000	77142000000	534990000	120630000	29352000000	64458000	23206000	54576000	92989000	70150000	306370000	200190000	723150000	116140000	14643000	1023400000	5565100000	29158000	8192200000	777040000	121520000	193680000	150570000	3821900000	1244200000	63705000	9735900000	4208400000	701010000	105910000	45392000
Q9NTI2;Q9NTI2-1;F8VRS1;F8W9B3	5	Phospholipid-transporting ATPase IB;Phospholipid-transporting ATPase	ATP8A2	sp|Q9NTI2|AT8A2_HUMAN Phospholipid-transporting ATPase IB OS=Homo sapiens OX=9606 GN=ATP8A2 PE=1 SV=3;sp|Q9NTI2-1|AT8A2-1_HUMAN Isoform of Q9NTI2, Isoform 1 of Phospholipid-transporting ATPase IB OS=Homo sapiens OX=9606 GN=ATP8A2 PE=1 SV=3;tr|F8VRS1|F8VRS1	1414900000	27378000	2328300	14558000	2989200	220790000	497180000	10294000	4808400	40392000	745670000	46082000	50582000	146310000	334640000	97135000	226600000	0	355450000	2970200	9483100	212960000	18845000	0	8555900	24625000	9262800	390570000	1152600	190740000	377290000	0	233090000	34996000	127840000	73597000	113400000	62991000	43632000	29693000	8118200	38935000	28625000	199210000	181110000
O75110;A0A0A0MR22;O75110-2	3	Probable phospholipid-transporting ATPase IIA;Phospholipid-transporting ATPase	ATP9A	sp|O75110|ATP9A_HUMAN Probable phospholipid-transporting ATPase IIA OS=Homo sapiens OX=9606 GN=ATP9A PE=1 SV=3;tr|A0A0A0MR22|A0A0A0MR22_HUMAN Isoform of O75110, Phospholipid-transporting ATPase OS=Homo sapiens OX=9606 GN=ATP9A PE=1 SV=1;sp|O75110-2|ATP9A-2	38116000	28146000	3552100	9861300	7754700	3354500	6139600	93404000	1563800	8568200	1879100	38122000	96012000	242870000	176740000	57566000	1726000	705710	256650000	0	367980	14150000	13233000	1009500	5404100	13594000	7704800	0	660470	11555000000	238690000	2005400	132960000	89224000	11128000	50225000	20280000	28427000	768150000	12680000	52847000	334500000	166200000	16000000	1224900
I3L448;Q5TC12;A8MRA7;Q5TC12-2;Q5TC12-3;H0YEW4	8	ATP synthase mitochondrial F1 complex assembly factor 1	ATPAF1	tr|I3L448|I3L448_HUMAN Isoform of Q5TC12, ATP synthase mitochondrial F1 complex assembly factor 1 OS=Homo sapiens OX=9606 GN=ATPAF1 PE=1 SV=1;sp|Q5TC12|ATPF1_HUMAN ATP synthase mitochondrial F1 complex assembly factor 1 OS=Homo sapiens OX=9606 GN=ATPAF1 PE	45808000	20832000	0	95635000	14280000	0	0	0	155910	16784000	16912000	74826000	108520000	0	529460000	4772400	9073400	0	1829300	0	10002000	0	5210200	16307000	29318000	8986100	394530	0	17180000	0	30099000	0	9661800	0	0	7485700	54941000	7938900	25560000	0	17322000	40277000	50331000	459000	10414000
Q8N5M1;C9J2Q2	3	ATP synthase mitochondrial F1 complex assembly factor 2	ATPAF2	sp|Q8N5M1|ATPF2_HUMAN ATP synthase mitochondrial F1 complex assembly factor 2 OS=Homo sapiens OX=9606 GN=ATPAF2 PE=1 SV=1;tr|C9J2Q2|C9J2Q2_HUMAN Isoform of Q8N5M1, ATP synthase mitochondrial F1 complex assembly factor 2 (Fragment) OS=Homo sapiens OX=9606 G	673480000	1280700000	86804000	307290000	157850000	143880000	145840000	481790000	126530	323180000	321000000	822950000	569190000	900790000	957940000	1305700000	320390000	143610000	1131000000	209440000	82699000	295700000	198840000	138970000	275160000	185690000	276330000	1015200000	70921000	1130400000	1556200000	122650000	985270000	712630000	936020000	486560000	846360000	597120000	545120000	59765000	612260000	1534500000	338290000	130480000	236400000
Q13535-2;Q13535-3;Q13535	6	Serine/threonine-protein kinase ATR	ATR	sp|Q13535-2|ATR-2_HUMAN Isoform of Q13535, Isoform 2 of Serine/threonine-protein kinase ATR OS=Homo sapiens OX=9606 GN=ATR PE=1 SV=3;sp|Q13535-3|ATR-3_HUMAN Isoform of Q13535, Isoform 3 of Serine/threonine-protein kinase ATR OS=Homo sapiens OX=9606 GN=ATR	157170000	444130000	53862000	409380000	41700000	9295000	4740800	167820000	15215000	697690000	25242000	102750000	1280000000	145950000	295960000	300900000	42291000	4248200	1397200000	457880	29887000	197860000	51812000	53418000	79741000	81828000	170360000	544800000	506980	1543100000	363400000	6332000	94869000	4205400000	76728000	57745000	355450000	240170000	874650000	50041000	236420000	441870000	9261500	226350000	19180000
O75882;O75882-2	2	Attractin	ATRN	sp|O75882|ATRN_HUMAN Attractin OS=Homo sapiens OX=9606 GN=ATRN PE=1 SV=2;sp|O75882-2|ATRN-2_HUMAN Isoform of O75882, Isoform 2 of Attractin OS=Homo sapiens OX=9606 GN=ATRN PE=1 SV=2	671460000	37937000	1239800	72452000	132170000	31854000	281260000	41882000	3221200	164660000	36324000	414600000	223290000	1003700000	190060000	193330000	104920000	624880	2402400000	29646000	5194800	54885000	129900000	212580000	67879000	266040000	44050000	115190000	8266000	348870000	349830000	5309700	1346000000	131640000	5415500	121320000	165580000	579540000	233600000	55647000	244710000	113990000	52286000	31714000	328640000
Q9UBB4;Q9UBB4-2;A0A1W2PQD2	5	Ataxin-10	ATXN10	sp|Q9UBB4|ATX10_HUMAN Ataxin-10 OS=Homo sapiens OX=9606 GN=ATXN10 PE=1 SV=1;sp|Q9UBB4-2|ATX10-2_HUMAN Isoform of Q9UBB4, Isoform 2 of Ataxin-10 OS=Homo sapiens OX=9606 GN=ATXN10 PE=1 SV=1;tr|A0A1W2PQD2|A0A1W2PQD2_HUMAN Isoform of Q9UBB4, Ataxin-10 OS=Homo	561510000	2833800000	199600000	3209700000	2505300000	1129600000	722290000	435710000	70618000	1825100000	2188400000	1858900000	2713300000	12160000000	2780000000	3971500000	943850000	1077400000	4529500000	580680000	406290000	1593400000	2929400000	2765500000	1081000000	3202600000	2192600000	483820000	357270000	5224200000	14297000000	680560000	3899900000	2685500000	2692300000	2060500000	3104700000	3675800000	3253000000	699790000	4594000000	7014200000	1299200000	1297100000	3065100000
Q99700-4;Q99700;Q99700-2;F8VQP2;F8WB06;V9GY86;A0A2R8Y7E6;A0A2R8Y5A6;H0YH87;A0A2R8Y7P6;A0A2R8YDM9;Q99700-5	16	Ataxin-2	ATXN2	sp|Q99700-4|ATX2-4_HUMAN Isoform of Q99700, Isoform 4 of Ataxin-2 OS=Homo sapiens OX=9606 GN=ATXN2 PE=1 SV=2;sp|Q99700|ATX2_HUMAN Ataxin-2 OS=Homo sapiens OX=9606 GN=ATXN2 PE=1 SV=2;sp|Q99700-2|ATX2-2_HUMAN Isoform of Q99700, Isoform 2 of Ataxin-2 OS=Homo	30939000	44786000	6609300	13558000	35796000	481450	9553300	141500000	30926000	94315000	72080000	45320000	53798000	100630000	130840000	48809000	5401100	3434800	133810000	547280	968130	186280000	16814000	54099000	10900000	24339000	74743000	33563000	662990000	89835000	76464000	3195400	325530000	106190000	120770	204290000	85905000	169550000	244780000	319480	15640000	293670000	33637000	12397000	106590000
Q8WWM7-6;Q8WWM7-8;Q8WWM7-5;Q8WWM7-4;Q8WWM7-9;Q8WWM7-2;Q8WWM7;Q8WWM7-3;H3BUF6;Q8WWM7-7	10	Ataxin-2-like protein	ATXN2L	sp|Q8WWM7-6|ATX2L-6_HUMAN Isoform of Q8WWM7, Isoform 6 of Ataxin-2-like protein OS=Homo sapiens OX=9606 GN=ATXN2L PE=1 SV=2;sp|Q8WWM7-8|ATX2L-8_HUMAN Isoform of Q8WWM7, Isoform 8 of Ataxin-2-like protein OS=Homo sapiens OX=9606 GN=ATXN2L PE=1 SV=2;sp|Q8WWM	37970000	20927000	3664400	22555000	4456900	685510	5349200	8306100	387390000	13079000	5885200	0	35739000	348450000	100290000	66154000	11093000	29504000	177310000	7109500	407780	4725200	0	7310000	1964200	17407000	13034000	272140000	7051700	259610000	109250000	505790	44736000	47354000	14979000	97300000	196030000	172190000	94063000	3195000	56837000	97334000	1001500	14074000	715080
P54252-4;P54252-1;P54252;A0A2R8Y3X7;G3V3R7;P54252-3;C9JQV6;F5H211;G3V328;D3VVH9;A0A087X1A8;A0A0A0MS38;A0A087WXY4;G3V4U9;G3V2G1;G3V2G2;P54252-5;G3V3T6;E9PJN5;S4R399	32	Ataxin-3	ATXN3	sp|P54252-4|ATX3-4_HUMAN Isoform of P54252, Isoform 4 of Ataxin-3 OS=Homo sapiens OX=9606 GN=ATXN3 PE=1 SV=5;sp|P54252-1|ATX3-1_HUMAN Isoform of P54252, Isoform 1 of Ataxin-3 OS=Homo sapiens OX=9606 GN=ATXN3 PE=1 SV=5;sp|P54252|ATX3_HUMAN Ataxin-3 OS=Homo	700000	37297000	25537000	36184000	71125000	9458200	12737000	41850000	29549000	164610000	404410000	43353000	6873000000	780490000	141480000	22574000	34928000	2583200	64116000	24505000	1162100	59556000	22781000	24906000	98768000	34084000000	50276000	81955000	2376800	207840000	163370000	0	54378000	245430000	5162800	41870000	252090000	320190000	2275700	27287000	6253800	142500000	58889000	118230000	43722000
Q13825;Q13825-2	2	Methylglutaconyl-CoA hydratase, mitochondrial	AUH	sp|Q13825|AUHM_HUMAN Methylglutaconyl-CoA hydratase, mitochondrial OS=Homo sapiens OX=9606 GN=AUH PE=1 SV=1;sp|Q13825-2|AUHM-2_HUMAN Isoform of Q13825, Isoform 2 of Methylglutaconyl-CoA hydratase, mitochondrial OS=Homo sapiens OX=9606 GN=AUH PE=1 SV=1	1013500000	1956200000	335760000	294990000	240910000	123940000	328060000	816820000	99393000	897310000	204310000	1021500000	641510000	1361900000	1003900000	583080000	95620000	30039000	3004700000	585150000	34239000	376350000	395390000	189540000	95546000	336610000	622370000	2874200000	90027000	1250100000	3207000000	54487000	3832600000	392910000	95065000	384830000	674510000	238670000	266090000	84228000	761920000	2746700000	396730000	62510000	247210000
O75366-2;O75366	2	Advillin	AVIL	sp|O75366-2|AVIL-2_HUMAN Isoform of O75366, Isoform 2 of Advillin OS=Homo sapiens OX=9606 GN=AVIL PE=1 SV=3;sp|O75366|AVIL_HUMAN Advillin OS=Homo sapiens OX=9606 GN=AVIL PE=1 SV=3	58563000	84456000	5129300	72485000	1009400	3489900	5052400	262240000	58382000	8258600	34587000	8027100	62213000	314000000	799840000	125650000	62774000	21593000	237110000	725230	3524600	5973900	27348000	13098000	8775900	62679000	27848000	189210000	0	306860000	564950000	12558000	146660000	85043000	1648500	63688000	59902000	595270000	261160000	3386700	38429000	633150000	51755000	19438000	212620000
Q8NBF6;B8ZZW5;Q8NBF6-2	3	Late secretory pathway protein AVL9 homolog	AVL9	sp|Q8NBF6|AVL9_HUMAN Late secretory pathway protein AVL9 homolog OS=Homo sapiens OX=9606 GN=AVL9 PE=1 SV=1;tr|B8ZZW5|B8ZZW5_HUMAN Isoform of Q8NBF6, Late secretory pathway protein AVL9 homolog OS=Homo sapiens OX=9606 GN=AVL9 PE=1 SV=1;sp|Q8NBF6-2|AVL9-2_HU	69175000	146630000	0	15590000	19273000	89166000	1579000	9841100	7381500	110670000	161120000	56043000	673260000	381160000	51491000	263050000	169020000	79048000	20349000	5812700	46279000	25774000	21680000	11436000	19368000	93176000	168130000	209950000	0	251990000	1688600000	8214700	44599000	261940000	48530000	124060000	567880000	310850000	529260000	16811000	493010000	442720000	218740000	2590800	260400000
P30530;P30530-2;M0R0W6	3	Tyrosine-protein kinase receptor UFO;Receptor protein-tyrosine kinase	AXL	sp|P30530|UFO_HUMAN Tyrosine-protein kinase receptor UFO OS=Homo sapiens OX=9606 GN=AXL PE=1 SV=4;sp|P30530-2|UFO-2_HUMAN Isoform of P30530, Isoform Short of Tyrosine-protein kinase receptor UFO OS=Homo sapiens OX=9606 GN=AXL PE=1 SV=4;tr|M0R0W6|M0R0W6_HUM	170140000	27690000	0	8543500	8687400	6445200	29790000	2617700	29263000	12030000	18604000	8861900	2392800	402140000	49965000	20466000	6593700	4051100	1422300	45850000	11275000	57538000	54811000	33564000	0	6331200	18128000	97367000	10398000	68781000	55840000	0	49279000	24280000	83532000	66859000	0	29773000	47610000	0	18131000	0	49375000	0	15349000
P25311;C9JEV0	2	Zinc-alpha-2-glycoprotein	AZGP1	sp|P25311|ZA2G_HUMAN Zinc-alpha-2-glycoprotein OS=Homo sapiens OX=9606 GN=AZGP1 PE=1 SV=2;tr|C9JEV0|C9JEV0_HUMAN Isoform of P25311, Zinc-alpha-2-glycoprotein OS=Homo sapiens OX=9606 GN=AZGP1 PE=1 SV=1	301080000	316030000	64464000	909600000	353420000	275400000	186660000	176240000	440220000	603620000	762390000	311320000	4414400000	6712000000	926190000	1578500000	310310000	306910000	4722500000	552190000	166820000	222820000	390420000	1095200000	1674000000	281690000	613290000	873660000	80194000	7110000000	1659200000	350010000	1181500000	1326600000	2270900000	1969800000	562710000	5601400000	5657700000	317750000	514850000	2302800000	381020000	2614300000	566680000
P20160	2	Azurocidin	AZU1	sp|P20160|CAP7_HUMAN Azurocidin OS=Homo sapiens OX=9606 GN=AZU1 PE=1 SV=3	0	155220000	0	0	3040600	976720	5666500	4737100	0	6023600	8408300	16847000	10842000	286850000	2389800	1202100	7973200	0	23275000	845530	0	16424000	0	2523500	492880	518540	722760	203030	617460	4607200	2914200	0	0	0	0	1883400	789110	14797000	4265100	69292	3935000	0	339020	0	14909000
P61769;H0YLF3;F5H6I0	3	Beta-2-microglobulin;Beta-2-microglobulin form pI 5.3	B2M	sp|P61769|B2MG_HUMAN Beta-2-microglobulin OS=Homo sapiens OX=9606 GN=B2M PE=1 SV=1;tr|H0YLF3|H0YLF3_HUMAN Isoform of P61769, Beta-2-microglobulin (Fragment) OS=Homo sapiens OX=9606 GN=B2M PE=1 SV=1;tr|F5H6I0|F5H6I0_HUMAN Isoform of P61769, Beta-2-microglob	112870000	68689000	22429000	65234000	58184000	37282000	9669300	70560000	0	38564000	71141000	94243000	62822000	1105700000	282090000	217890000	14827000	19130000	755930000	56588000	23304000	0	94862000	34982000	29086000	28663000	15046000	136390000	38582000	1175800000	499600000	29110000	315750000	266710000	63700000	18554000	25327000	324240000	221760000	47621000	112290000	1114800000	9689400	78456000	44152000
Q6Y288	1	Beta-1,3-glucosyltransferase	B3GALTL	sp|Q6Y288|B3GLT_HUMAN Beta-1,3-glucosyltransferase OS=Homo sapiens OX=9606 GN=B3GLCT PE=1 SV=2	28298000	14521000	0	18770000	0	11609000	2177100	759780	262180	4339100	290480000	50463000	10949000	33338000	26997000	29584000	0	1663000	85848000	1531900	1649300	43789000	13779000	554330	56368000	41384000	17245000	10698000	3094600	24610000	66419000	0	10565000	141360000	45949000	4794600	29484000	24398000	28598000	49670000	15068000	70751000	1794100	30209000	11016000
O43505	1	Beta-1,4-glucuronyltransferase 1	B4GAT1	sp|O43505|B4GA1_HUMAN Beta-1,4-glucuronyltransferase 1 OS=Homo sapiens OX=9606 GN=B4GAT1 PE=1 SV=1	18018000	32765000	1859200	21640000	15491000	14459000	6818900	5813400	0	0	25932000	67780000	97746000	660810000	22308000	457990000	73476000	9619400	938690000	89795000	6105000	206800000	68491000	136480000	123120000	1658700	39224000	52316000	3045200	1092300000	48127000	932940	142890000	105530000	6006000	617170000	75383000	11325000	72330000	22005000	650350000	432400000	15877000	41290000	23059000
Q9NWV8;J3KQS6;M0R0I0;M0R3F4;M0R2A4;M0R2K3;M0R193;M0R2I2;Q9NWV8-3	12	BRISC and BRCA1-A complex member 1	BABAM1	sp|Q9NWV8|BABA1_HUMAN BRISC and BRCA1-A complex member 1 OS=Homo sapiens OX=9606 GN=BABAM1 PE=1 SV=1;tr|J3KQS6|J3KQS6_HUMAN Isoform of Q9NWV8, BRISC and BRCA1-A complex member 1 OS=Homo sapiens OX=9606 GN=BABAM1 PE=1 SV=2;tr|M0R0I0|M0R0I0_HUMAN Isoform of	130210000	1628600000	406470000	212600000	220800000	203890000	107340000	1424500000	52062000	948580000	297260000	1731500000	637710000	1673400000	516810000	555220000	246380000	209690000	2985500000	196170000	152100000	863940000	111060000	168570000	173330000	764230000	186150000	705850000	515810000	73759000000	3952300000	102230000	1000700000	488740000	100840000	507800000	726090000	964470000	841290000	83145000	876340000	2771400000	621000000	167140000	125650000
Q92934	3	Bcl2-associated agonist of cell death	BAD	sp|Q92934|BAD_HUMAN Bcl2-associated agonist of cell death OS=Homo sapiens OX=9606 GN=BAD PE=1 SV=3	34937000	88595000	21981000	8685600	32918000	31664000	23790000	82154000	0	3492900000	44178000	110320000	613840000	745400000	150420000	263490000	46143000	8077200	294420000	53798000	6468800	32014000	48322000	59951000	7184100	58349000	64297000	119560000	44866000	385800000	1197700000	18027000	119970000	289360000	36255000	77462000	124130000	319300000	158480000	13872000	122920000	380370000	69708000	19243000	15821000
O95816;O95816-2	2	BAG family molecular chaperone regulator 2	BAG2	sp|O95816|BAG2_HUMAN BAG family molecular chaperone regulator 2 OS=Homo sapiens OX=9606 GN=BAG2 PE=1 SV=1;sp|O95816-2|BAG2-2_HUMAN Isoform of O95816, Isoform 2 of BAG family molecular chaperone regulator 2 OS=Homo sapiens OX=9606 GN=BAG2 PE=1 SV=1	32550000	28570000	7966800	78362000	24415000	3205900	3352100	8092400	0	342680000	15853000	10233000	68206000	84348000	26118000	116880000	11448000	17453000	157190000	0	8888300	37307000	5184800	5510000	58463000	32009000	15951000	41355000	1340000	28364000	4185800000	4168800	79852000	0	3208500	8820600	23903000	66438000	46227000	2285400	13236000	260250000	49483000	17632000	15034000
O95817;C9JFK9	2	BAG family molecular chaperone regulator 3	BAG3	sp|O95817|BAG3_HUMAN BAG family molecular chaperone regulator 3 OS=Homo sapiens OX=9606 GN=BAG3 PE=1 SV=3;tr|C9JFK9|C9JFK9_HUMAN Isoform of O95817, BAG family molecular chaperone regulator 3 (Fragment) OS=Homo sapiens OX=9606 GN=BAG3 PE=1 SV=1	40099000	102640000	9381700	49055000	126720000	7659000	3359000	58236000	3419500	285630000	32180000	21674000	110420000	648150000	188920000	57767000	712500000	1583100	232170000	20757000	1451600	40695000	25725000	7948600	112370000	37325000	21698000	93617000	2496400	145770000	312390000	42501000	194120000	65441000	44328000	37553000	29649000	756190000	259890000	39339000	315850000	887630000	7419400	55421000	35396000
O95429;O95429-2	3	BAG family molecular chaperone regulator 4	BAG4	sp|O95429|BAG4_HUMAN BAG family molecular chaperone regulator 4 OS=Homo sapiens OX=9606 GN=BAG4 PE=1 SV=1;sp|O95429-2|BAG4-2_HUMAN Isoform of O95429, Isoform 2 of BAG family molecular chaperone regulator 4 OS=Homo sapiens OX=9606 GN=BAG4 PE=1 SV=1	84460000	74215000	21576000	211110000	2175300	25269000	8660200	159960000	30305000	207550000	48504000	580110000	52147000	201440000	68419000	95642000	9101300	3981000	332480000	4016900	27192000	139180000	241520000	27805000	1262800000	89288000	315960000	56763000	2914400	138300000	2913900000	27702000	54610000	2740800	7363200	29855000	94224000	60083000	149610000	0	23910000	85404000	16269000	118280000	3331200
Q9UL15-2;Q9UL15	3	BAG family molecular chaperone regulator 5	BAG5	sp|Q9UL15-2|BAG5-2_HUMAN Isoform of Q9UL15, Isoform 2 of BAG family molecular chaperone regulator 5 OS=Homo sapiens OX=9606 GN=BAG5 PE=1 SV=1;sp|Q9UL15|BAG5_HUMAN BAG family molecular chaperone regulator 5 OS=Homo sapiens OX=9606 GN=BAG5 PE=1 SV=1	132110000	48816000	19736000	61187000	8173400	57840000	35975000	61448000	29710000	26805000	50083000	13131000	22164000	12508000	62780000	47247000	28592000	23576000	101380000	1294200	38054000	28629000	328860000	16107000	37035000	86907000	34530000	15839000	243790	4278800	28097000	2903400	2744000	50330000	45577000	64817000	45425000	213120000	33640000	15743000	16769000	127840000	54909000	2408500	37422000
P46379;A0A0G2JK23;P46379-3;P46379-2;A0A024RCR6;P46379-5;P46379-4;A0A0G2JL47	23	Large proline-rich protein BAG6	BAG6;BAT3	sp|P46379|BAG6_HUMAN Large proline-rich protein BAG6 OS=Homo sapiens OX=9606 GN=BAG6 PE=1 SV=2;tr|A0A0G2JK23|A0A0G2JK23_HUMAN Isoform of P46379, Large proline-rich protein BAG6 OS=Homo sapiens OX=9606 GN=BAG6 PE=1 SV=1;sp|P46379-3|BAG6-3_HUMAN Isoform of P	86975000	148000000	9030300	91324000	109570000	22100000	6444200	77867000	8781100	34856000	241200000	56557000	2118900000	471730000	134390000	203220000	186980000	48512000	410070000	6269800	14939000	72464000	11355000	34504000	61785000	127330000	568930000	86276000	321340	211100000	236870000	6899200	287950000	86933000	98339000	49569000	572260000	2834600000	397560000	40324000	167630000	269400000	157520000	362870000	95596000
Q9UQB8-5;Q9UQB8;Q9UQB8-2;Q9UQB8-6;Q9UQB8-4;Q9UQB8-3;I3L4C2;I3L2M4	20	Brain-specific angiogenesis inhibitor 1-associated protein 2	BAIAP2	sp|Q9UQB8-5|BAIP2-5_HUMAN Isoform of Q9UQB8, Isoform 5 of Brain-specific angiogenesis inhibitor 1-associated protein 2 OS=Homo sapiens OX=9606 GN=BAIAP2 PE=1 SV=1;sp|Q9UQB8|BAIP2_HUMAN Brain-specific angiogenesis inhibitor 1-associated protein 2 OS=Homo sa	60976000	358320000	5097100	5675700	44152000	33185000	14135000	61729000	19293000	12546000	65472000	155410000	201050000	4556800000	37705000	11260000	18995000	17231000	131450000	15223000	18411000	46224000	96417000	269610000	120400000	205560000	76622000	8433700	572910	81361000	588800000	5405200	41012000	57462000	75269000	87364000	45488000	601260000	186820000	8316600	372820000	217250000	33222000	951830000	52863000
O94812-5;O94812-3;O94812-6;O94812;O94812-7;O94812-2	8	BAI1-associated protein 3	BAIAP3	sp|O94812-5|BAIP3-5_HUMAN Isoform of O94812, Isoform 4 of BAI1-associated protein 3 OS=Homo sapiens OX=9606 GN=BAIAP3 PE=1 SV=2;sp|O94812-3|BAIP3-3_HUMAN Isoform of O94812, Isoform 3 of BAI1-associated protein 3 OS=Homo sapiens OX=9606 GN=BAIAP3 PE=1 SV=2;	245460000	143540000	12941000	103080000	379260000	5835500	79502000	34913000	630270	50232000	150300000	114250000	467110000	126570000	320830000	426490000	8554900	2197000	1271900000	72013000	94002000	64907000	125790000	212230000	120540000	292170000	44744000	269070000	2905300	30189000	388040000	19966000	217790000	1149200000	154410000	810320000	45637000	1012600000	1177400000	94767000	211730000	754790000	220440000	395530000	140060000
O75531	1	Barrier-to-autointegration factor;Barrier-to-autointegration factor, N-terminally processed	BANF1	sp|O75531|BAF_HUMAN Barrier-to-autointegration factor OS=Homo sapiens OX=9606 GN=BANF1 PE=1 SV=1	0	0	0	0	0	1049600	0	816770	0	28071000	8844100	0	28471000	133900000	0	0	0	0	0	0	0	0	0	1117400	78339000	0	0	1452700	0	2883100	23480000	0	39949000	0	45171000	5360400	0	255930000	10114000	0	0	0	0	313080000	1095100
Q8IXM2-2;Q8IXM2;Q8IXM2-3;F8W038;F8W1H0;H0YIS7	6	Chromatin complexes subunit BAP18	BAP18;C17orf49;RNASEK-C17orf49	sp|Q8IXM2-2|BAP18-2_HUMAN Isoform of Q8IXM2, Isoform 2 of Chromatin complexes subunit BAP18 OS=Homo sapiens OX=9606 GN=BAP18 PE=1 SV=1;sp|Q8IXM2|BAP18_HUMAN Chromatin complexes subunit BAP18 OS=Homo sapiens OX=9606 GN=BAP18 PE=1 SV=1;sp|Q8IXM2-3|BAP18-3_HU	25486000	118800000	0	126650000	12515000	6520000	0	1314600	3779600	8252800	0	10312000	167560000	319950000	67471000	937120	9234600	0	114250000	1151900	0	19587000	15715000	50085000	32732000	2792400	3494200	2907600	0	51354000	35253000	418340	21279000	2254800	1437600	0	5163900	90119000	4685100	8881400	24320000	70196000	2439200	18032000	28153000
[truncated: 5,220 more rows]
[truncated: 42 more columns]

## Sheet: Input AD>NCI
Protein IDs	Number of proteins	Protein names	Gene names	Fasta headers	avg AD	avg NCI	FC AD vs NCI	ttest	FC>1 and ttest<=0.25				Included:	gProfiler
													> query_1 (2090)	Query parameters
[truncated: 4,209 more rows]

## Sheet: Input MCI>NCI
Gene names	avg MCI	avg NCI	ttest	FC MCI vs NCI	FC>1 AND ttest<=0.25		Query parameters	Included: FC>1 AND ttest<=0.25
SLC39A12	4728930	0.1	0.0725402	47289300	1		version	> query_1 (1814)
[truncated: 5,749 more rows]

## Sheet: Input AD>MCI
Gene names	avg AD	avg MCI	FC AD vs MCI	ttest	FC MCI vs AD	FC>1 AND ttest <=0.25		Included: FC > 1 AND ttest <=0.25	Query parameters
[truncated: 3,062 more rows]

[truncated: 5 more sheets: Output ADvsNCI, Output MCIvsNCI, Output ADvsMCI, KEGG transition, Reactome transition]
