# Supplementary material for: Systems-Level Interactome Mapping Reveals Actionable Protein Network Dysregulation Across the Alzheimer's Disease Spectrum
Source: Research Square preprint supplement (doi:10.21203/rs.3.rs-5930673/v1), 2025-02-12
Supplement: Supplementary file 2 [file 6f9c98cba1b732bafb3bb599.xlsx]

## Sheet: NeuroPro data
Gene	NeuroPro Score (Total)	NeuroPro Score (Bulk Tissue)	Increased in AD	Decreased in AD	Single Directional Outlier	Inconsistent in AD	NFT Protein	Plaque Protein	Inconsistent in Plaques	CAA Protein	Published Studies Linked to AD	Understudied
GFAP	31	25	TRUE				INCREASED	INCREASED		INCREASED	1882			Article https://doi.org/10.1038/s41467-023-40208-x
APP	28	24	TRUE				INCREASED	INCREASED			18228			Compilation of reported protein changes in
HSPB1	27	23	TRUE				INCREASED	PRESENT			47			the brain in Alzheimer’s disease
CD44	25	21	TRUE					INCREASED		INCREASED	44			Nature Communications 2023
CLU	24	19	TRUE		TRUE		INCREASED	INCREASED		INCREASED	583
RPH3A	22	19		TRUE				PRESENT		DECREASED	2	TRUE
VGF	22	19		TRUE				INCREASED		DECREASED	46			NeuroPro Dataset. Data exported from NeuroPro on 7-21-22. Details 5311 significantly altered proteins in human AD brain tissue. Highlighted proteins are the 55 most consistently identified altered proteins in human AD brain tissue (NeuroPro Score (Total) ³15). Column Identifiers:
CAPG	20	17	TRUE				INCREASED	INCREASED			0	TRUE
CORO1A	20	17		TRUE	TRUE		PRESENT	PRESENT			2	TRUE		NeuroPro Score (Total): Total number of studies a protein is either significantly altered in AD bulk tissue or present/altered in neuropathological lesions.
ACTN2	19	17		TRUE				PRESENT			1	TRUE		NeuroPro Score (Bulk Tissue): Total number of bulk tissue studies a protein is significantly altered in AD (combination of preclinical AD, MCI, AD stages).
APOE	19	14	TRUE				PRESENT	INCREASED		INCREASED	10606			Increased in AD: Proteins consistently identified as significantly increased in AD vs controls in ≥5 studies of bulk tissue. One directional outlier was permitted for this designation.
C4A	19	14	TRUE				INCREASED	INCREASED		INCREASED	52			Decreased in AD: Proteins consistently identified as significantly decreased in AD vs controls in ≥5 studies of bulk tissue. One directional outlier was permitted for this designation.
PADI2	19	16	TRUE					PRESENT		INCREASED	10	TRUE
ANXA1	18	14	TRUE				PRESENT	INCREASED			24
DNM1L	18	15		TRUE	TRUE		PRESENT	PRESENT			87
HOMER1	18	15		TRUE			DECREASED	PRESENT			16
PLCD1	18	15	TRUE					PRESENT		INCREASED	4	TRUE
AHNAK	17	14	TRUE				PRESENT	PRESENT			1	TRUE
ANXA5	17	15	TRUE					PRESENT			58
GJA1	17	15	TRUE					PRESENT			17
PRDX6	17	14	TRUE				PRESENT	PRESENT			25
STXBP1	17	14		TRUE	TRUE		PRESENT	PRESENT			15
SYT12	17	15		TRUE				PRESENT			1	TRUE
VCAN	17	13				TRUE	INCREASED	PRESENT			7	TRUE
AP3D1	16	14		TRUE				PRESENT			0	TRUE
APCS	16	12	TRUE					INCREASED		INCREASED	138
BAG3	16	14	TRUE					PRESENT			21
GPNMB	16	13	TRUE					INCREASED		INCREASED	16
HTRA1	16	12	TRUE					INCREASED		INCREASED	33
IDH2	16	13				TRUE	PRESENT	PRESENT			10	TRUE
MAOB	16	14	TRUE					PRESENT			534
MAPT	16	11	TRUE				INCREASED	INCREASED			23171
OTUB1	16	14		TRUE	TRUE			PRESENT			3	TRUE
PBXIP1	16	14	TRUE					PRESENT			0	TRUE
PLEC	16	13	TRUE				PRESENT	PRESENT			1	TRUE
UCHL1	16	12				TRUE	PRESENT	PRESENT		INCREASED	98
VIM	16	11	TRUE				INCREASED	INCREASED			125
ANXA2	15	12	TRUE		TRUE		PRESENT	PRESENT			13
AP2A1	15	12		TRUE			PRESENT	PRESENT			1	TRUE
ATP2A2	15	12		TRUE			PRESENT	PRESENT			6	TRUE
CAP2	15	12		TRUE			PRESENT	PRESENT			3	TRUE
CSTB	15	11	TRUE					INCREASED		INCREASED	14
FARSB	15	12		TRUE			PRESENT	PRESENT			1	TRUE
GNAI1	15	13		TRUE				PRESENT			3	TRUE
GNG12	15	13	TRUE					PRESENT			1	TRUE
GRIA2	15	12		TRUE			PRESENT	PRESENT			41
PPP2R1A	15	12		TRUE			PRESENT	PRESENT			3	TRUE
PRDX1	15	12	TRUE		TRUE		PRESENT	PRESENT			16
S100A6	15	13	TRUE		TRUE			PRESENT			14
SEPTIN5	15	12		TRUE			PRESENT	PRESENT			7	TRUE
SH3GL1	15	12		TRUE	TRUE			PRESENT		INCREASED	1	TRUE
SNAP25	15	11		TRUE			PRESENT	PRESENT		DECREASED	184
SUCLA2	15	12		TRUE			PRESENT	PRESENT			0	TRUE
YWHAQ	15	12		TRUE	TRUE		PRESENT	PRESENT			4	TRUE
AK1	14	10	TRUE				PRESENT	PRESENT		INCREASED
AQP4	14	11	TRUE				PRESENT	PRESENT
C4B; C4B_2	14	13	TRUE					INCREASED
CA4	14	11		TRUE	TRUE			PRESENT		DECREASED
CSRP1	14	12	TRUE					PRESENT
DBI	14	12	TRUE					PRESENT
DLG4	14	12		TRUE				PRESENT
DNAJC6	14	12		TRUE				PRESENT
DPP6	14	12		TRUE	TRUE			PRESENT
EZR	14	11	TRUE				PRESENT	INCREASED
FABP5	14	11	TRUE				PRESENT	PRESENT
FABP7	14	12	TRUE		TRUE			PRESENT
GLS	14	11		TRUE			PRESENT	PRESENT
GSTP1	14	10	TRUE				PRESENT	PRESENT		INCREASED
HAPLN2	14	11				TRUE	PRESENT	PRESENT
LRPPRC	14	11		TRUE			PRESENT	PRESENT
MAP2	14	11		TRUE			PRESENT	PRESENT
MDK	14	11	TRUE					INCREASED
OLFM1	14	11		TRUE			INCREASED	PRESENT
PLXNA1	14	12		TRUE				PRESENT
PSAT1	14	10	TRUE				PRESENT	PRESENT		INCREASED
RAB3A	14	11				TRUE	PRESENT	PRESENT
RAP1GDS1	14	12				TRUE		PRESENT
SMOC1	14	11	TRUE					INCREASED
STX1A	14	11		TRUE	TRUE		PRESENT	PRESENT
SUCLG1	14	12		TRUE				PRESENT
SYNPO	14	12		TRUE				PRESENT
UBA1	14	9				TRUE	PRESENT	INCREASED		INCREASED
YWHAB	14	10				TRUE	PRESENT	INCREASED
ADIRF	13	13	TRUE		TRUE
ARHGDIA	13	8				TRUE	INCREASED	PRESENT		INCREASED
C3	13	10	TRUE					INCREASED		INCREASED
CAPS	13	12	TRUE					INCREASED
CYFIP2	13	10		TRUE			PRESENT	PRESENT
DBNL	13	11		TRUE				PRESENT
ENO1	13	9	TRUE				INCREASED	PRESENT
FHL1	13	10	TRUE					PRESENT		INCREASED
GAS7	13	11		TRUE				PRESENT		INCREASED
GMPR	13	13	TRUE
HSP90AA1	13	9				TRUE	PRESENT	PRESENT		INCREASED
HSPB8	13	12	TRUE					PRESENT
ICAM1	13	10	TRUE					INCREASED
MAPRE3	13	11		TRUE				PRESENT
MSN	13	10	TRUE				PRESENT	INCREASED
OXCT1	13	10		TRUE			PRESENT	PRESENT
PGD	13	10	TRUE				PRESENT	PRESENT
PGM2L1	13	10		TRUE			PRESENT	PRESENT
PPIA	13	8				TRUE	INCREASED	PRESENT		INCREASED
PPME1	13	11		TRUE	TRUE			PRESENT		INCREASED
PREP	13	10		TRUE	TRUE			PRESENT		INCREASED
RTN4	13	10		TRUE			PRESENT	PRESENT
YWHAZ	13	9		TRUE			PRESENT	INCREASED
ACAN	12	11	TRUE					PRESENT
AP2A2	12	9		TRUE			PRESENT	PRESENT
AP2M1	12	10		TRUE				PRESENT
AP3B2	12	10		TRUE				PRESENT
BAIAP2	12	10		TRUE				PRESENT
CP	12	9	TRUE		TRUE			INCREASED
CRMP1	12	9		TRUE	TRUE		PRESENT	PRESENT
DBN1	12	9		TRUE	TRUE		PRESENT	PRESENT
DCLK1	12	9		TRUE			PRESENT	PRESENT
DLAT	12	9		TRUE			PRESENT	PRESENT
DPYSL4	12	9		TRUE			PRESENT	PRESENT
EPB41L3	12	9		TRUE			PRESENT	PRESENT
FARSA	12	9		TRUE			PRESENT	PRESENT
FGG	12	7	TRUE				DECREASED	INCREASED		INCREASED
GAP43	12	9				TRUE	PRESENT	PRESENT
HP	12	10	TRUE		TRUE			PRESENT
HPCA	12	11		TRUE				DECREASED
HSPA4L	12	9		TRUE			PRESENT	PRESENT
IDH3G	12	10				TRUE		PRESENT
IRGQ	12	10		TRUE				INCREASED
KIF5C	12	10		TRUE				PRESENT
NDUFA10	12	10		TRUE				PRESENT
PAFAH1B3	12	9	TRUE					PRESENT		INCREASED
PAK1	12	10		TRUE				PRESENT
PDHX	12	9		TRUE			PRESENT	PRESENT
PLCB1	12	8		TRUE			PRESENT	PRESENT		INCREASED
SERPINA1	12	9	TRUE		TRUE			INCREASED
SGIP1	12	10		TRUE				PRESENT
SH3GLB2	12	10		TRUE	TRUE			PRESENT
SPR	12	10	TRUE					PRESENT
SQSTM1	12	8	TRUE				INCREASED	INCREASED
SYNGAP1	12	9		TRUE			PRESENT	PRESENT
SYNJ1	12	9		TRUE			PRESENT	PRESENT
SYT1	12	9		TRUE	TRUE		PRESENT	PRESENT
THY1	12	9				TRUE	INCREASED	PRESENT
TLN2	12	10		TRUE	TRUE			PRESENT
UGP2	12	10	TRUE					PRESENT
VPS35	12	8		TRUE	TRUE		PRESENT	PRESENT		INCREASED
WDR1	12	9				TRUE	PRESENT	PRESENT
ACTN1	11	9		TRUE				PRESENT
ADD3	11	9	TRUE					PRESENT
AMPD2	11	10	TRUE					PRESENT
ANKS1B	11	10		TRUE				PRESENT
AP2B1	11	8		TRUE			PRESENT	PRESENT
ATL1	11	9		TRUE				PRESENT
ATP1A3	11	8		TRUE			PRESENT	PRESENT
ATP1B2	11	9				TRUE		PRESENT
BSN	11	9		TRUE				PRESENT
C1QC	11	7	TRUE					INCREASED		INCREASED
CAMK2A	11	7		TRUE	TRUE		DECREASED	PRESENT
CAPN2	11	9	TRUE					PRESENT
CAPNS1	11	9	TRUE					PRESENT
CD47	11	8		TRUE			PRESENT	PRESENT
CHGA	11	10	TRUE					INCREASED
CLIC1	11	8	TRUE					INCREASED		INCREASED
CLTC	11	8		TRUE			PRESENT	PRESENT
CNDP2	11	6	TRUE				INCREASED	PRESENT		INCREASED
COTL1	11	8	TRUE					PRESENT		INCREASED
CTSD	11	7	TRUE				PRESENT	INCREASED
EPN1	11	9		TRUE	TRUE			PRESENT
FASN	11	8				TRUE	PRESENT	PRESENT
FGA	11	8	TRUE					PRESENT		INCREASED
FGB	11	8	TRUE					PRESENT		INCREASED
FLT1	11	8	TRUE					INCREASED		INCREASED
GAPDH	11	8	TRUE				PRESENT	PRESENT
GNAZ	11	9		TRUE				PRESENT
GSK3A	11	8		TRUE	TRUE		PRESENT	PRESENT
GYG1	11	9	TRUE					PRESENT
HP1BP3	11	8				TRUE	PRESENT	PRESENT
ITGB1	11	10	TRUE					PRESENT
KIAA0513	11	9		TRUE				PRESENT
LRRC57	11	10		TRUE				PRESENT
LTA4H	11	9	TRUE					PRESENT		INCREASED
MAP2K1	11	9				TRUE		PRESENT
MAP2K4	11	10		TRUE	TRUE			PRESENT
MAPK1	11	8	TRUE				PRESENT	PRESENT
MTAP	11	11	TRUE
NDUFV1	11	9		TRUE	TRUE			PRESENT
NECAP1	11	9		TRUE				PRESENT
NEFM	11	8	TRUE				PRESENT	PRESENT
NNT	11	8		TRUE	TRUE		PRESENT	PRESENT
NUMBL	11	9		TRUE	TRUE			PRESENT
OLA1	11	8				TRUE		PRESENT		INCREASED
OLFML3	11	7	TRUE					INCREASED		INCREASED
ORM1	11	11				TRUE
PALM	11	7		TRUE			INCREASED	PRESENT
PCLO	11	9		TRUE	TRUE			PRESENT
PDIA3	11	9				TRUE		PRESENT
PFN2	11	8				TRUE	PRESENT	PRESENT
PGAM1	11	6				TRUE	INCREASED	PRESENT		INCREASED
PGAM2	11	11	TRUE
PHF24	11	9		TRUE				PRESENT
PHGDH	11	7	TRUE				PRESENT	PRESENT		INCREASED
PKM	11	8	TRUE				PRESENT	PRESENT
PNPO	11	9	TRUE		TRUE			PRESENT
PRKCG	11	8		TRUE			PRESENT	PRESENT
QDPR	11	8	TRUE				PRESENT	PRESENT
RALA	11	9		TRUE				PRESENT
SELENBP1	11	9	TRUE					PRESENT
SEPTIN2	11	8	TRUE				PRESENT	PRESENT
SIRPA	11	9		TRUE	TRUE			PRESENT
SYNM	11	9	TRUE					PRESENT
TKT	11	8	TRUE				PRESENT	PRESENT
TNC	11	8	TRUE					PRESENT		INCREASED
ABR	10	8		TRUE				PRESENT
ADAP1	10	8		TRUE	TRUE			PRESENT		INCREASED
AHCYL1	10	7				TRUE	PRESENT	PRESENT
AKR1B1	10	6	TRUE				PRESENT	PRESENT		INCREASED
ALAD	10	8	TRUE					PRESENT
ALDH1L1	10	7	TRUE					PRESENT		INCREASED
ANO6	10	10	TRUE
AP1G1	10	8		TRUE				PRESENT
ARHGEF2	10	8		TRUE				PRESENT
ATP2B1	10	7		TRUE			PRESENT	PRESENT
ATP2B2	10	7		TRUE				INCREASED
ATP6V1H	10	6		TRUE			PRESENT	INCREASED
BBOX1	10	8	TRUE					PRESENT
BLVRB	10	6	TRUE				INCREASED	PRESENT		INCREASED
CA2	10	7	TRUE				PRESENT	PRESENT
CADM3	10	7		TRUE			INCREASED	PRESENT
CADPS	10	8		TRUE				PRESENT
CASKIN1	10	8		TRUE				PRESENT
CBR1	10	5	TRUE		TRUE		INCREASED	PRESENT		INCREASED
COL25A1	10	6	TRUE				INCREASED	INCREASED
CORO2B	10	8		TRUE				PRESENT
CRIP2	10	8		TRUE	TRUE			PRESENT
CYRIA	10	9		TRUE	TRUE			PRESENT
DBT	10	9		TRUE	TRUE			INCREASED
DDAH2	10	7	TRUE					PRESENT		INCREASED
DDX1	10	7				TRUE	PRESENT	PRESENT
DIRAS2	10	8		TRUE				PRESENT
DKK3	10	7	TRUE					INCREASED		INCREASED
DMXL2	10	8		TRUE				PRESENT
DNM1	10	6		TRUE			PRESENT	INCREASED
DPYSL2	10	7				TRUE	PRESENT	PRESENT
FBXL16	10	9		TRUE				PRESENT
FLNA	10	9	TRUE					PRESENT
FTL	10	8	TRUE					INCREASED
GABRA1	10	8				TRUE		DECREASED
GDAP1	10	8		TRUE				PRESENT
GRPEL1	10	8		TRUE				PRESENT
H1-0	10	7	TRUE					INCREASED		DECREASED
H1-2	10	8	TRUE					PRESENT
H4C1; H4C2; H4C3; H4C4; H4C5; H4C6; H4C8; H4C9; H4C11; H4C12; H4C13; H4C14; H4C15; H4-16	10	8	TRUE					PRESENT
HDHD2	10	7				TRUE		PRESENT		INCREASED
HEPACAM	10	7	TRUE				PRESENT	PRESENT
HGS	10	9		TRUE	TRUE			PRESENT
HMGB1	10	7	TRUE					INCREASED		INCREASED
HSP90AB1	10	6				TRUE	PRESENT	INCREASED
IARS2	10	8		TRUE				PRESENT
IDH3A	10	7		TRUE	TRUE		PRESENT	PRESENT
IPO7	10	7		TRUE	TRUE		INCREASED	PRESENT		INCREASED
LCP1	10	8	TRUE		TRUE			INCREASED
LGALS1	10	8	TRUE					PRESENT
LGALS3	10	7	TRUE					PRESENT		INCREASED
LHPP	10	8	TRUE					INCREASED
LINGO1	10	8		TRUE				PRESENT
MAP4	10	7	TRUE		TRUE		PRESENT	PRESENT
MTX2	10	8				TRUE		PRESENT
NAPB	10	7		TRUE			PRESENT	PRESENT
NCKAP1	10	8		TRUE	TRUE			PRESENT
NDRG2	10	7				TRUE	PRESENT	PRESENT
NDUFA5	10	8		TRUE	TRUE			PRESENT
NDUFS6	10	7		TRUE	TRUE			PRESENT		DECREASED
NEFH	10	7	TRUE				PRESENT	PRESENT
NEFL	10	7	TRUE				PRESENT	PRESENT
NFS1	10	8		TRUE				PRESENT
NRN1	10	10		TRUE
NTN1	10	7	TRUE					INCREASED
OGDH	10	8		TRUE				PRESENT
OGDHL	10	8		TRUE				DECREASED
OPA1	10	8		TRUE				PRESENT
PACSIN1	10	7		TRUE			PRESENT	PRESENT
PDCD6IP	10	8		TRUE	TRUE			PRESENT
PDHA1	10	7		TRUE			PRESENT	PRESENT
PDHB	10	7		TRUE	TRUE		PRESENT	PRESENT
PEA15	10	5	TRUE				INCREASED	PRESENT		INCREASED
PGM2	10	9	TRUE					INCREASED
PLSCR4	10	9	TRUE					PRESENT
PPM1H	10	8		TRUE				PRESENT
RAC1	10	8				TRUE		PRESENT
RNH1	10	6	TRUE				PRESENT	PRESENT		INCREASED
RTN1	10	8		TRUE				PRESENT
S100A1	10	8	TRUE					INCREASED
SCAI	10	9		TRUE				PRESENT
SCIN	10	9	TRUE					INCREASED
SCRN1	10	6	TRUE		TRUE		PRESENT	PRESENT		INCREASED
SDC4	10	7	TRUE					INCREASED
SEPTIN11	10	8		TRUE				PRESENT
SEPTIN3	10	8				TRUE		PRESENT
SLC2A3	10	9		TRUE				INCREASED
SLC30A3	10	8		TRUE				PRESENT
SLC4A10	10	9		TRUE				PRESENT
SPTBN2	10	7		TRUE			PRESENT	PRESENT
SRI	10	7	TRUE				PRESENT	PRESENT
SV2B	10	8		TRUE	TRUE			PRESENT
TBCB	10	8				TRUE		PRESENT
TIMM44	10	9		TRUE				DECREASED
TPP1	10	9	TRUE					INCREASED
TRAP1	10	7		TRUE			PRESENT	PRESENT
TUBB3	10	7		TRUE			PRESENT	PRESENT
TWF2	10	8		TRUE	TRUE			PRESENT
USP14	10	6		TRUE	TRUE		PRESENT	PRESENT		INCREASED
VPS26A	10	7				TRUE		PRESENT		INCREASED
A2M	9	7	TRUE					PRESENT
ABAT	9	6				TRUE	PRESENT	PRESENT
ABI2	9	7		TRUE				PRESENT
ACAT2	9	7				TRUE		PRESENT
AGRN	9	7	TRUE					INCREASED
ALDH9A1	9	6	TRUE				PRESENT	PRESENT
APRT	9	6	TRUE					PRESENT		INCREASED
ARRB1	9	6	TRUE					PRESENT		INCREASED
ATP1A2	9	6		TRUE			PRESENT	PRESENT
ATP1B1	9	6		TRUE			PRESENT	PRESENT
ATP5PF	9	6				TRUE		PRESENT		DECREASED
ATP6V1D	9	6		TRUE				INCREASED
ATP8A1	9	7	TRUE		TRUE			PRESENT
AUH	9	7		TRUE	TRUE			PRESENT
BASP1	9	5		TRUE			PRESENT	PRESENT		DECREASED
CAMK4	9	7		TRUE				PRESENT
CEP170B	9	7		TRUE				PRESENT
CHCHD6	9	7		TRUE				PRESENT
CLIC4	9	7	TRUE		TRUE			PRESENT
CNRIP1	9	5				TRUE	INCREASED	PRESENT
COPS4	9	6		TRUE	TRUE			PRESENT		INCREASED
COX5A	9	5		TRUE			PRESENT	PRESENT		DECREASED
COX5B	9	5		TRUE			PRESENT	PRESENT		DECREASED
COX6B1	9	6		TRUE	TRUE			PRESENT		DECREASED
CPNE6	9	5	TRUE		TRUE		PRESENT	PRESENT		INCREASED
CRAT	9	7		TRUE	TRUE			PRESENT
CTNND1	9	8		TRUE				PRESENT
DLG1	9	7		TRUE				PRESENT
DLG3	9	7		TRUE				PRESENT
DMTN	9	6		TRUE			PRESENT	PRESENT
DPYSL3	9	7	TRUE					PRESENT
DUSP3	9	6		TRUE	TRUE			PRESENT		INCREASED
DYNC1LI1	9	7		TRUE				PRESENT
EEF1B2	9	5		TRUE	TRUE		PRESENT	PRESENT		INCREASED
ENTPD2	9	6	TRUE					PRESENT		INCREASED
ESD	9	7	TRUE					PRESENT
FBXO2	9	6	TRUE					PRESENT		INCREASED
FSCN1	9	5				TRUE	PRESENT	PRESENT		INCREASED
G6PD	9	7	TRUE		TRUE			PRESENT
GDA	9	6		TRUE			PRESENT	PRESENT
GNA13	9	7	TRUE					PRESENT
GNL1	9	7		TRUE				PRESENT
GPHN	9	6		TRUE			PRESENT	PRESENT
GPI	9	5				TRUE	PRESENT	PRESENT		INCREASED
GRHPR	9	7	TRUE					PRESENT
GSN	9	6	TRUE				PRESENT	PRESENT
HNRNPM	9	5	TRUE				DECREASED	PRESENT
HSPB6	9	8	TRUE					INCREASED
HSPD1	9	6		TRUE			PRESENT	PRESENT
IGHA1	9	7				TRUE		PRESENT
IMMT	9	6		TRUE	TRUE		PRESENT	PRESENT
KLC2	9	8		TRUE				DECREASED
KRAS	9	7		TRUE	TRUE			PRESENT
MACROD1	9	8	TRUE		TRUE			PRESENT
MACROH2A1	9	7	TRUE					PRESENT
MGLL	9	8		TRUE				PRESENT
MTCH2	9	7				TRUE		PRESENT
MYO5A	9	7		TRUE			PRESENT	PRESENT
NCDN	9	5				TRUE	PRESENT	PRESENT		INCREASED
NDRG4	9	7	TRUE		TRUE			PRESENT
NDUFB9	9	7		TRUE				PRESENT
NECAB2	9	7		TRUE				PRESENT
NECTIN1	9	8		TRUE	TRUE			PRESENT
NPC2	9	9	TRUE
NPEPPS	9	6	TRUE		TRUE		PRESENT	PRESENT
PAICS	9	7	TRUE					PRESENT
PCDH1	9	7		TRUE				PRESENT
PGLS	9	7	TRUE					PRESENT
PHACTR1	9	7		TRUE				PRESENT
PHB	9	6		TRUE	TRUE		PRESENT	PRESENT
PIP5K1C	9	7		TRUE				PRESENT
PLCD3	9	8	TRUE					PRESENT
PLIN3	9	9	TRUE
PLXNA4	9	7		TRUE				PRESENT
PPP2R5E	9	7		TRUE	TRUE			PRESENT
PRDX5	9	6	TRUE		TRUE		PRESENT	PRESENT
PRKACA	9	8		TRUE	TRUE			PRESENT
PRKCE	9	7		TRUE				PRESENT
PSD3	9	7		TRUE	TRUE			PRESENT
PTPA	9	6				TRUE		PRESENT		INCREASED
PYGB	9	6	TRUE				PRESENT	PRESENT
RABEP1	9	8		TRUE				PRESENT
RGS7	9	8		TRUE				PRESENT
RIDA	9	7				TRUE		PRESENT
ROCK2	9	7		TRUE	TRUE			PRESENT
RPS3	9	6				TRUE	PRESENT	PRESENT
RTN3	9	7		TRUE				PRESENT
RUVBL2	9	6	TRUE				PRESENT	PRESENT
S100A11	9	9	TRUE
S100A9	9	6	TRUE				PRESENT	PRESENT
SERPINA3	9	6	TRUE				PRESENT	INCREASED
SGTB	9	9		TRUE
SH3BGRL	9	6	TRUE				PRESENT	PRESENT
SLC25A22	9	7		TRUE				PRESENT
SLC25A27	9	9		TRUE
SLIRP	9	9		TRUE	TRUE
SOD1	9	6	TRUE		TRUE		PRESENT	PRESENT
STX1B	9	6		TRUE			PRESENT	PRESENT
TAGLN3	9	7		TRUE				PRESENT
TJP2	9	7	TRUE					PRESENT
TPI1	9	6				TRUE	PRESENT	PRESENT
TPPP	9	6		TRUE	TRUE		PRESENT	PRESENT
TPPP3	9	6	TRUE					PRESENT		INCREASED
TUBA4A	9	6		TRUE	TRUE		PRESENT	PRESENT
TUBB	9	6		TRUE	TRUE		PRESENT	PRESENT
UBE2M	9	6				TRUE		PRESENT		INCREASED
UQCRB	9	7		TRUE	TRUE			PRESENT
VSNL1	9	7		TRUE	TRUE			PRESENT
VTA1	9	8		TRUE				PRESENT
WDR7	9	7		TRUE				PRESENT
AASDHPPT	8	5				TRUE		PRESENT		INCREASED
ABHD14B	8	5	TRUE					INCREASED		INCREASED
ACTN4	8	5		TRUE			PRESENT	PRESENT
ACTR3B	8	7		TRUE				PRESENT
ACYP2	8	6				TRUE		PRESENT
ADH5	8	6	TRUE					PRESENT
AKR1A1	8	5				TRUE		PRESENT		INCREASED
AKR7A2	8	5	TRUE					PRESENT		INCREASED
ANK2	8	5				TRUE	PRESENT	PRESENT
ANXA4	8	6	TRUE					PRESENT
AP1B1	8	6		TRUE				PRESENT
AP3M2	8	6		TRUE				PRESENT
ARL3	8	5				TRUE		PRESENT		INCREASED
ASAH1	8	6	TRUE					INCREASED
ATG3	8	6	TRUE					DECREASED
ATP5PO	8	6		TRUE	TRUE			PRESENT
ATP6V0A1	8	4					PRESENT	INCREASED
ATP6V1B2	8	4					PRESENT	INCREASED
ATP6V1E1	8	4					PRESENT	INCREASED
BCL2L13	8	6				TRUE	INCREASED	PRESENT
BDH2	8	6	TRUE					PRESENT
CADM2	8	6		TRUE				PRESENT
CD109	8	8	TRUE
CDC42	8	6		TRUE				PRESENT
CDK5	8	5		TRUE			PRESENT	PRESENT
CHCHD3	8	5				TRUE	PRESENT	PRESENT
CKB	8	5		TRUE	TRUE		PRESENT	PRESENT
CLTA	8	5		TRUE	TRUE		PRESENT	PRESENT
CLTB	8	5		TRUE	TRUE		PRESENT	PRESENT
CPLX2	8	6		TRUE				PRESENT
CPNE5	8	6		TRUE	TRUE			PRESENT
CRKL	8	7				TRUE		PRESENT
CRYL1	8	6	TRUE		TRUE			PRESENT
CYC1	8	6		TRUE	TRUE			PRESENT
CYRIB	8	5		TRUE			DECREASED	PRESENT
DIRAS1	8	6		TRUE	TRUE			PRESENT
DLD	8	5		TRUE			PRESENT	PRESENT
DNM3	8	6		TRUE				PRESENT
DSTN	8	5		TRUE			PRESENT	PRESENT
EEF1A2	8	6				TRUE		PRESENT
EEF1G	8	5		TRUE	TRUE		PRESENT	PRESENT
EIF4H	8	6				TRUE		PRESENT
ERLIN2	8	6	TRUE					DECREASED
FABP3	8	5		TRUE	TRUE		PRESENT	PRESENT
FKBP1A	8	5		TRUE			INCREASED	PRESENT
FXYD6	8	6		TRUE	TRUE			PRESENT
GLUD1	8	5	TRUE		TRUE		PRESENT	PRESENT
GNB1	8	5		TRUE			PRESENT	PRESENT
GNB2	8	5				TRUE		PRESENT		INCREASED
GPM6B	8	7				TRUE		PRESENT
GRIA3	8	7		TRUE				PRESENT
GSK3B	8	7		TRUE				PRESENT
HEBP2	8	8	TRUE
HLA-DRA	8	6	TRUE					INCREASED
HMOX2	8	7		TRUE				PRESENT
HPCAL4	8	5		TRUE			INCREASED	PRESENT
HPX	8	6	TRUE					INCREASED
HSPE1	8	5		TRUE			PRESENT	PRESENT
IDH3B	8	5		TRUE			PRESENT	PRESENT
IMPA1	8	5	TRUE				PRESENT	PRESENT
INA	8	5	TRUE		TRUE		PRESENT	PRESENT
LANCL1	8	5	TRUE		TRUE		PRESENT	PRESENT
LDHA	8	5		TRUE			PRESENT	PRESENT
LDHB	8	5	TRUE				PRESENT	PRESENT
LMNA	8	5	TRUE				PRESENT	PRESENT
LONP1	8	6		TRUE				PRESENT
LRRC40	8	7		TRUE				PRESENT
LTF	8	4					PRESENT	INCREASED
MECP2	8	8				TRUE
MTHFD1	8	5	TRUE				PRESENT	PRESENT
NAGK	8	5	TRUE					PRESENT		INCREASED
NAPG	8	5		TRUE			PRESENT	PRESENT
NCALD	8	7		TRUE				PRESENT
NDUFA9	8	6		TRUE				PRESENT
NDUFS1	8	5		TRUE			PRESENT	PRESENT
NDUFS3	8	5		TRUE			PRESENT	PRESENT
NRXN1	8	4						INCREASED		INCREASED
NTM	8	6		TRUE	TRUE			PRESENT
NUCKS1	8	7	TRUE					PRESENT
PACS1	8	5		TRUE			INCREASED	PRESENT
PDK3	8	6		TRUE				PRESENT
PDXP	8	5		TRUE	TRUE		PRESENT	PRESENT
PEBP1	8	5	TRUE				PRESENT	PRESENT
PFN1	8	4					PRESENT	PRESENT		INCREASED
PGM3	8	6	TRUE					PRESENT
PLCL2	8	7		TRUE			DECREASED
PLP1	8	5	TRUE		TRUE		PRESENT	DECREASED
PLPBP	8	6				TRUE		PRESENT
PPP2CA	8	6		TRUE				PRESENT
PPP3CB	8	5		TRUE			PRESENT	PRESENT
PPP5C	8	6		TRUE				PRESENT
PPT1	8	6	TRUE					PRESENT
PSMA2	8	6				TRUE		PRESENT
PSME1	8	7	TRUE					INCREASED
PTN	8	5	TRUE		TRUE			INCREASED		INCREASED
PTRHD1	8	7	TRUE					INCREASED
PURA	8	5		TRUE			PRESENT	PRESENT
QPRT	8	7	TRUE					PRESENT
RAB3B	8	8		TRUE
RASAL1	8	6		TRUE				PRESENT
RDX	8	6	TRUE					PRESENT
RHOB	8	6		TRUE	TRUE			PRESENT
RPLP0	8	5		TRUE			DECREASED	PRESENT
RPS2	8	4					DECREASED	PRESENT
S100A13	8	5				TRUE		PRESENT		INCREASED
S100B	8	7	TRUE		TRUE			PRESENT
SAR1A	8	6		TRUE	TRUE			PRESENT
SEPTIN7	8	5		TRUE			PRESENT	PRESENT
SLC25A3	8	5		TRUE			PRESENT	PRESENT
SLC8A2	8	6		TRUE				PRESENT
SLC9A3R1	8	6	TRUE					PRESENT
SLIT2	8	5	TRUE					INCREASED		INCREASED
SNAP91	8	5		TRUE			PRESENT	PRESENT
SORBS1	8	6	TRUE		TRUE			PRESENT
SRSF1	8	5	TRUE				PRESENT	PRESENT
SSBP1	8	4					INCREASED	PRESENT
STAM	8	6		TRUE	TRUE			PRESENT		INCREASED
STOM	8	6	TRUE		TRUE			PRESENT
SYN1	8	5		TRUE			PRESENT	PRESENT
SYNGR1	8	6		TRUE				PRESENT
TAGLN2	8	6	TRUE					PRESENT
TANC2	8	8				TRUE
TMEM30A	8	6	TRUE		TRUE			PRESENT
TMPO	8	6	TRUE				PRESENT	INCREASED
TOM1L2	8	6		TRUE				PRESENT
TXNDC17	8	5	TRUE					PRESENT		INCREASED
VAMP2	8	5		TRUE			PRESENT	PRESENT
VPS29	8	6				TRUE		PRESENT
WARS1	8	6		TRUE				PRESENT
WASF1	8	6		TRUE				PRESENT
YARS1	8	6		TRUE	TRUE			PRESENT
AARS1	7	5				TRUE		PRESENT
ABLIM2	7	6		TRUE				PRESENT
ACLY	7	4						PRESENT		INCREASED
ACTR2	7	5		TRUE	TRUE			PRESENT
ADD2	7	4					PRESENT	PRESENT
AFG3L2	7	5		TRUE				PRESENT
AGAP2	7	5		TRUE				PRESENT
AGK	7	6		TRUE				PRESENT
AIFM1	7	5		TRUE	TRUE			PRESENT
AP1M1	7	5		TRUE	TRUE			PRESENT		INCREASED
AP2S1	7	4					PRESENT	PRESENT
APEH	7	5		TRUE	TRUE			PRESENT
ARPC1A	7	5		TRUE				PRESENT
ASAP1	7	7		TRUE
ATP1A1	7	4					PRESENT	PRESENT
ATP2B3	7	5		TRUE				PRESENT
CACNA2D1	7	4					PRESENT	PRESENT
CACNG3	7	7		TRUE
CALR	7	5		TRUE	TRUE			PRESENT
CAMK2B	7	3					DECREASED	PRESENT
CAMKV	7	5		TRUE	TRUE			PRESENT
CBR3	7	4						INCREASED		INCREASED
CD99	7	7	TRUE
CEND1	7	3					PRESENT	PRESENT		DECREASED
COPS6	7	5				TRUE		PRESENT		INCREASED
CPLX1	7	6		TRUE	TRUE			DECREASED
CRYM	7	4					PRESENT	PRESENT
CTHRC1	7	6	TRUE					INCREASED
CTNNA2	7	5		TRUE	TRUE			PRESENT
CYCS	7	4					PRESENT	PRESENT
DCTN1	7	5		TRUE	TRUE			PRESENT
DDX3X	7	5	TRUE		TRUE			DECREASED
DHX9	7	3					DECREASED	PRESENT
DPP10	7	5		TRUE				PRESENT
DPYSL5	7	5		TRUE	TRUE			PRESENT
DST	7	6	TRUE		TRUE			PRESENT
DYNLL2	7	6		TRUE				PRESENT
EHD3	7	6		TRUE				PRESENT
ELOB	7	5		TRUE				PRESENT
ENO2	7	3					INCREASED	PRESENT
EPHA4	7	5		TRUE				PRESENT
ERP44	7	4					PRESENT	PRESENT
FAH	7	5	TRUE					PRESENT
FAM162A	7	6		TRUE				PRESENT
FGF1	7	5	TRUE					INCREASED
FN3KRP	7	5	TRUE					INCREASED
FTH1	7	4					PRESENT	PRESENT
GANAB	7	4					PRESENT	PRESENT
GFRA2	7	6		TRUE				INCREASED
GLRX	7	6	TRUE					PRESENT
GNAI2	7	5		TRUE	TRUE			PRESENT
GOT2	7	4					PRESENT	PRESENT
GPC1	7	3						INCREASED		INCREASED
GPM6A	7	4					PRESENT	PRESENT
GRB2	7	4					PRESENT	PRESENT
GRIN1	7	6		TRUE				PRESENT
GRK2	7	6		TRUE	TRUE			PRESENT
GRM2	7	6		TRUE	TRUE			DECREASED
GSPT1	7	5	TRUE					INCREASED		INCREASED
GSTM3	7	4						PRESENT		INCREASED
GYG2	7	7	TRUE
H1-4	7	5	TRUE					PRESENT
H2AX	7	7	TRUE
H2AZ2	7	5	TRUE					PRESENT
H3-3A; H3-3B	7	7	TRUE
HBA1; HBA2	7	5	TRUE		TRUE			PRESENT
HINT1	7	5	TRUE		TRUE			PRESENT
HINT2	7	4					DECREASED	PRESENT
HK1	7	4					PRESENT	PRESENT
HNRNPH1	7	4					PRESENT	PRESENT
HNRNPU	7	3					DECREASED	PRESENT
HPRT1	7	5		TRUE				PRESENT
HSD17B4	7	5	TRUE		TRUE			PRESENT
HSP90B1	7	4					PRESENT	PRESENT
HSPA2	7	5	TRUE					PRESENT
HSPA8	7	4					PRESENT	PRESENT
IDH1	7	5	TRUE					PRESENT
IGHG1	7	6	TRUE				PRESENT
IGKC	7	6	TRUE					PRESENT
ITGAV	7	6	TRUE					PRESENT
ITIH4	7	7	TRUE
KCTD12	7	5	TRUE		TRUE			PRESENT
KPNA3	7	6				TRUE		PRESENT
LAMP2	7	7	TRUE
LANCL2	7	5		TRUE	TRUE			PRESENT
LETM1	7	5		TRUE				PRESENT
LGALSL	7	6		TRUE				PRESENT
LLGL1	7	5	TRUE					PRESENT
LRP1	7	5	TRUE					INCREASED
LRRC47	7	4					PRESENT	PRESENT
LY6H	7	5		TRUE	TRUE			INCREASED
MAP2K2	7	5	TRUE					PRESENT
MAPK3	7	4						PRESENT		INCREASED
MAPRE2	7	5				TRUE		PRESENT
MARK1	7	6		TRUE				PRESENT
MBP	7	4					PRESENT	DECREASED
MDH1	7	4					PRESENT	PRESENT
MDH2	7	4					PRESENT	PRESENT
MLC1	7	5	TRUE					PRESENT
MMUT	7	6		TRUE	TRUE			PRESENT
MRPS35	7	7		TRUE
NAMPT	7	6	TRUE					PRESENT
NAP1L1	7	4						PRESENT		INCREASED
NCAM1	7	3					PRESENT	PRESENT
NCAN	7	5		TRUE				PRESENT
NCL	7	4					PRESENT	PRESENT
NDUFB10	7	5		TRUE				PRESENT
NDUFB7	7	5		TRUE				PRESENT
NDUFC2	7	5		TRUE				PRESENT
NDUFS2	7	5		TRUE				PRESENT
NDUFS4	7	5		TRUE	TRUE			INCREASED
NECAB1	7	6		TRUE						INCREASED
NIT1	7	5		TRUE				PRESENT
NPTX2	7	7		TRUE
NRBP1	7	7		TRUE
NRCAM	7	4					PRESENT	PRESENT
NSF	7	4					PRESENT	PRESENT
NT5DC3	7	5		TRUE				PRESENT
NUDT5	7	6	TRUE					PRESENT
OLFM3	7	7		TRUE
OPCML	7	3					INCREASED	PRESENT
ORM2	7	7				TRUE
OSBPL8	7	7		TRUE
P08107	7	7	TRUE
PAFAH1B1	7	5				TRUE		PRESENT
PARK7	7	4					PRESENT	PRESENT
PCMT1	7	4					PRESENT	PRESENT
PCSK1	7	7		TRUE
PDE2A	7	5		TRUE	TRUE			PRESENT
PGK1	7	4					PRESENT	PRESENT
PLXNB1	7	6	TRUE					PRESENT
PPEF1	7	7		TRUE
PPM1E	7	5		TRUE	TRUE			PRESENT
PPP1CB	7	5		TRUE				PRESENT
PPP1R1B	7	5	TRUE		TRUE			PRESENT
PPP1R7	7	4					PRESENT	PRESENT
PRKRA	7	6		TRUE				PRESENT
PRNP	7	5				TRUE		PRESENT
PSAP	7	4					PRESENT	INCREASED
PSMA1	7	5				TRUE		PRESENT
PSMA3	7	4					PRESENT	PRESENT
PSMA6	7	4					PRESENT	PRESENT
PTK2B	7	5		TRUE	TRUE			PRESENT
RAB27B	7	6	TRUE		TRUE			PRESENT
RAN	7	4					PRESENT	PRESENT
RANGAP1	7	6	TRUE		TRUE			PRESENT
RAP2B	7	5		TRUE	TRUE			PRESENT
RELCH	7	5		TRUE				PRESENT
RFTN1	7	7				TRUE
RIMS1	7	6		TRUE	TRUE			PRESENT
RNPEP	7	6	TRUE					PRESENT
RPL12	7	4					PRESENT	PRESENT
RPL5	7	5				TRUE		PRESENT
RPL6	7	4					PRESENT	PRESENT
RPL8	7	3					DECREASED	PRESENT
RPLP1	7	7				TRUE
RPS16	7	5		TRUE				PRESENT
RPS25	7	5	TRUE					INCREASED
RPS4X	7	5		TRUE				PRESENT
RPS6KA2	7	6	TRUE					PRESENT
SAMHD1	7	6	TRUE					INCREASED
SARS2	7	6		TRUE				PRESENT
SBDS	7	6				TRUE		PRESENT
SDHA	7	5		TRUE	TRUE			PRESENT
SDHB	7	4					PRESENT	PRESENT
SEC14L2	7	4						PRESENT		INCREASED
SERPINE2	7	3						INCREASED		INCREASED
SERPING1	7	7	TRUE		TRUE
SH3GL2	7	4					PRESENT	PRESENT
SHANK2	7	7		TRUE
SLC17A7	7	5		TRUE				PRESENT
SLC1A2	7	4					PRESENT	PRESENT
SLC1A3	7	5	TRUE		TRUE			PRESENT
SLC25A11	7	5		TRUE				PRESENT
SLC25A4	7	5		TRUE	TRUE			PRESENT
SLC25A5	7	5		TRUE	TRUE			PRESENT
SLC7A5	7	5		TRUE				PRESENT
SNCA	7	4					PRESENT	PRESENT
SNCG	7	4					PRESENT	PRESENT
SNRPD2	7	5	TRUE					PRESENT
SNRPD3	7	6				TRUE		PRESENT
SNX12	7	4						PRESENT		INCREASED
SNX30	7	6		TRUE	TRUE			PRESENT
SOD2	7	5	TRUE				PRESENT	PRESENT
SPOCK2	7	5	TRUE					INCREASED
SPON1	7	3						INCREASED		INCREASED
SPP1	7	7	TRUE
SPTAN1	7	4					PRESENT	PRESENT
SRPK2	7	4					PRESENT	PRESENT
SRSF7	7	5				TRUE	PRESENT	PRESENT
STIP1	7	4					PRESENT	PRESENT
STUM	7	5				TRUE		PRESENT
SV2A	7	4					PRESENT	PRESENT
SYNGR3	7	5		TRUE	TRUE			PRESENT
SYT7	7	6		TRUE				DECREASED
TARS1	7	5				TRUE		PRESENT
TAX1BP3	7	6				TRUE		PRESENT
TBC1D10B	7	5		TRUE				PRESENT
TBC1D24	7	6		TRUE				DECREASED
TCEAL3	7	5	TRUE					PRESENT
TKFC	7	5	TRUE					PRESENT		INCREASED
TLN1	7	5	TRUE		TRUE			PRESENT
TPD52L1	7	7	TRUE
TPD52L2	7	6	TRUE		TRUE			PRESENT
TPM3	7	4					PRESENT	PRESENT
TPT1	7	5		TRUE	TRUE			PRESENT		INCREASED
TTC7B	7	6		TRUE				PRESENT
TTYH1	7	5		TRUE				PRESENT
TUBB4A	7	3					PRESENT	PRESENT		INCREASED
TUFM	7	4					PRESENT	PRESENT
UQCRC1	7	4					PRESENT	PRESENT
UQCRQ	7	5		TRUE				PRESENT
VCL	7	4					PRESENT	PRESENT
WASF3	7	5		TRUE				PRESENT
XRCC6	7	4					PRESENT	PRESENT
YWHAE	7	3					PRESENT	INCREASED
YWHAG	7	4					PRESENT	PRESENT
YWHAH	7	4					PRESENT	PRESENT
AAK1	6	4						PRESENT
ACAA2	6	4						PRESENT
ACADM	6	5				TRUE		PRESENT
ACO2	6	3					PRESENT	PRESENT
ACOT7	6	3					PRESENT	PRESENT
ACOT9	6	4						PRESENT
ACSS1	6	5		TRUE	TRUE			PRESENT
ADAM11	6	6		TRUE
ADAM22	6	4						PRESENT
ADD1	6	3					PRESENT	PRESENT
AGPAT1	6	6		TRUE
AHSA1	6	4						PRESENT
AIMP1	6	5		TRUE				PRESENT
AK5	6	4						PRESENT
AKAP12	6	4						PRESENT
ALDH1A1	6	4						PRESENT
ALDH2	6	3					PRESENT	PRESENT
ALDH4A1	6	3					PRESENT	PRESENT
AMPH	6	3					PRESENT	PRESENT
ANP32B	6	6	TRUE
APMAP	6	3					PRESENT	PRESENT
APOD	6	3					PRESENT	PRESENT
APOO	6	4						DECREASED
AQP1	6	4						INCREASED
ATCAY	6	4						PRESENT
ATP5F1A	6	4						PRESENT
ATP5PD	6	4						PRESENT
ATP6V0D1	6	3					PRESENT	PRESENT
ATP6V1A	6	3					PRESENT	PRESENT
ATP6V1F	6	4						PRESENT
AVL9	6	5		TRUE				PRESENT
BCAP31	6	5				TRUE		INCREASED
BDH1	6	4						PRESENT
BPHL	6	5		TRUE				INCREASED
BSG	6	3						PRESENT		DECREASED
C2CD2L	6	5		TRUE				PRESENT
CAP1	6	3					PRESENT	PRESENT
CARMIL2	6	4						PRESENT
CAT	6	3					PRESENT	PRESENT
CCDC6	6	4						PRESENT
CCT4	6	3					PRESENT	PRESENT
CD200	6	5		TRUE	TRUE			PRESENT
CDC37	6	3					PRESENT	PRESENT
CDC42BPB	6	5		TRUE				PRESENT
CDH10	6	6		TRUE
CFL1	6	3					PRESENT	PRESENT
CLSTN1	6	3						INCREASED
COPS3	6	4						PRESENT
COPS7A	6	4						PRESENT
CPE	6	4						INCREASED
CPNE3	6	4						PRESENT
CRACDL	6	5		TRUE				PRESENT
CRK	6	3						PRESENT		INCREASED
CROCC	6	4						DECREASED
CRYAB	6	4						PRESENT
CS	6	3					PRESENT	PRESENT
CST3	6	2					PRESENT	PRESENT		INCREASED
CTTN	6	4						PRESENT
CXADR	6	6		TRUE
CYB5R3	6	4						PRESENT
DDX39B	6	3					PRESENT	PRESENT
DLG2	6	5		TRUE				PRESENT
DLGAP1	6	5		TRUE				DECREASED
DLGAP3	6	4						PRESENT
DLST	6	3					PRESENT	PRESENT
DNAJB2	6	4						PRESENT
DNPEP	6	5	TRUE					PRESENT
DTNA	6	4						PRESENT
DYNC1H1	6	3					PRESENT	PRESENT
DYNC1I1	6	4						PRESENT
DYNC1LI2	6	4						PRESENT
ECPAS	6	5		TRUE	TRUE					INCREASED
EDF1	6	5	TRUE					PRESENT
EEF2	6	3					PRESENT	PRESENT
EFR3B	6	5		TRUE				PRESENT
EIF4A2	6	3					PRESENT	PRESENT
EIF4G1	6	6		TRUE
ENOPH1	6	3						PRESENT		INCREASED
EPB41L2	6	4						PRESENT
EPDR1	6	4						INCREASED
ERC2	6	4						PRESENT
ESYT1	6	4						INCREASED
ETF1	6	5	TRUE					INCREASED
FBXO41	6	4						PRESENT
FERMT2	6	4						PRESENT		INCREASED
FGF2	6	5	TRUE					PRESENT
FH	6	3					PRESENT	PRESENT
FIS1	6	4						PRESENT
FKBP2	6	5				TRUE		PRESENT
FKBP4	6	3						PRESENT		INCREASED
FSD1	6	4						PRESENT
FXYD7	6	5		TRUE				DECREASED
GAA	6	4						PRESENT
GC	6	6	TRUE
GCLC	6	4						PRESENT		INCREASED
GLUL	6	3					PRESENT	PRESENT
GMPS	6	4						PRESENT		INCREASED
GNAO1	6	2					DECREASED	PRESENT
GNB5	6	4						PRESENT
GNG2	6	4						PRESENT
GNPDA1	6	4						PRESENT
GPD1	6	6	TRUE
GPD2	6	2					DECREASED	PRESENT
GPR158	6	5		TRUE				PRESENT
GPR37L1	6	4						PRESENT
GPRC5B	6	4						PRESENT
GPX1	6	5	TRUE					PRESENT
GRIN2B	6	5		TRUE				PRESENT
GRM3	6	6		TRUE
GSTK1	6	5		TRUE				PRESENT
H1-5	6	4						INCREASED
H2AZ1	6	6	TRUE
HADHA	6	4						PRESENT
HAGH	6	3					INCREASED	PRESENT
HARS1	6	4						PRESENT		INCREASED
HDHD3	6	4						PRESENT
HNRNPA2B1	6	3					PRESENT	PRESENT
HNRNPH3	6	2					DECREASED	PRESENT
HNRNPK	6	3					PRESENT	PRESENT
HPCAL1	6	4						PRESENT
HSPA12A	6	3					PRESENT	PRESENT
HSPA5	6	3					PRESENT	PRESENT
HSPA9	6	3					PRESENT	PRESENT
HYOU1	6	3					PRESENT	PRESENT
IARS1	6	5		TRUE				PRESENT
IGFBP5	6	6	TRUE
INPP4A	6	4						PRESENT		INCREASED
IPO5	6	5		TRUE	TRUE			PRESENT
ISOC1	6	5	TRUE		TRUE			PRESENT
ISYNA1	6	6	TRUE
ITGA7	6	6	TRUE
KRT1	6	4						INCREASED
KRT9	6	5	TRUE		TRUE			INCREASED
LAMP1	6	5	TRUE		TRUE			PRESENT
LMNB1	6	4					PRESENT	PRESENT
LMNB2	6	4					PRESENT	PRESENT
LSAMP	6	4						PRESENT
MAP1S	6	4						PRESENT
MAPRE1	6	4						PRESENT
MARCKS	6	4					PRESENT	PRESENT
MATR3	6	2					DECREASED	PRESENT
MGST3	6	4						INCREASED		INCREASED
MPST	6	5	TRUE					PRESENT
MT-ATP8	6	5		TRUE						DECREASED
MYH10	6	3					PRESENT	PRESENT
MYH9	6	3					PRESENT	PRESENT
NARS1	6	3						PRESENT		INCREASED
NAXD	6	4						PRESENT
NAXE	6	4						PRESENT
NDUFA12	6	4						PRESENT
NDUFA2	6	3					PRESENT	PRESENT
NDUFA8	6	4						PRESENT
NDUFB4	6	4						PRESENT
NDUFB8	6	4						PRESENT
NDUFS8	6	4						PRESENT
NDUFV2	6	4						PRESENT
NF1	6	6		TRUE
NIPSNAP1	6	4						PRESENT
NIPSNAP2	6	4						PRESENT
NPTN	6	3					PRESENT	PRESENT
NRAS	6	5		TRUE			PRESENT
NRGN	6	5				TRUE		DECREASED
NUCB1	6	4					PRESENT	PRESENT
OAT	6	5		TRUE				PRESENT
OGA	6	4						PRESENT
OSBPL1A	6	5				TRUE				INCREASED
OXR1	6	4						PRESENT
P05067a	6	6	TRUE
P4HB	6	3					PRESENT	PRESENT
P62158	6	6		TRUE
PACSIN2	6	4						PRESENT
PARP1	6	4					PRESENT	DECREASED
PC	6	4						PRESENT
PCBD1	6	4						PRESENT
PCSK1N	6	3					PRESENT	PRESENT
PEPD	6	4						PRESENT
PFKFB2	6	3						PRESENT		INCREASED
PFKP	6	2					PRESENT	INCREASED
PGM1	6	4						PRESENT
PHYHD1	6	4						PRESENT
PHYHIPL	6	4						PRESENT
PICK1	6	5		TRUE				PRESENT
PITPNA	6	4						PRESENT
PLPP3	6	4						PRESENT
PPFIA3	6	4						PRESENT
PPIB	6	3					INCREASED	PRESENT
PPP1CA	6	5		TRUE				PRESENT
PPP2R5B	6	6		TRUE
PPP2R5D	6	5		TRUE				PRESENT
PPP3R1	6	4						PRESENT
PRDX2	6	3					PRESENT	PRESENT
PRKACB	6	4						PRESENT
PRKCA	6	4						PRESENT
PRPSAP2	6	3						PRESENT		INCREASED
PRRT2	6	4						PRESENT
PRXL2A	6	4						PRESENT
PSMA5	6	3					PRESENT	PRESENT
PSMA7	6	3					PRESENT	PRESENT
PTGDS	6	3					INCREASED	INCREASED
PTPRZ1	6	3					PRESENT	PRESENT
PYGM	6	3						PRESENT		INCREASED
RAB10	6	4						PRESENT
RAB35	6	4						PRESENT
RAB3GAP2	6	5		TRUE				PRESENT
RAB5A	6	4						PRESENT
RAB6B	6	3					PRESENT	PRESENT
RABGGTA	6	4						PRESENT		INCREASED
RAP2A	6	4						PRESENT
RHEB	6	5		TRUE				PRESENT
RHOA	6	4						PRESENT
RPL13	6	3					PRESENT	PRESENT
RPL23A	6	3					DECREASED	PRESENT
RPL28	6	4						PRESENT
RPL7	6	2					DECREASED	PRESENT
RPS12	6	6				TRUE
RPS28	6	3					PRESENT	PRESENT
RPS3A	6	3					PRESENT	PRESENT
RPS6	6	3					PRESENT	PRESENT
RPS8	6	3					PRESENT	PRESENT
S100A10	6	5	TRUE					INCREASED
SAMM50	6	5				TRUE		PRESENT
SCARB2	6	4						PRESENT
SCCPDH	6	4						PRESENT
SCFD1	6	5		TRUE	TRUE			PRESENT
SCN2A	6	4						PRESENT
SDR39U1	6	5		TRUE				PRESENT
SFN	6	3					PRESENT	PRESENT
SFPQ	6	3					PRESENT	PRESENT
SFRP1	6	5	TRUE					INCREASED
SFXN1	6	4						PRESENT
SHANK3	6	4						PRESENT
SHMT2	6	5		TRUE				PRESENT
SKP1	6	4						PRESENT
SLC12A5	6	3					PRESENT	PRESENT
SLC1A4	6	4						INCREASED
SLC25A46	6	5		TRUE				PRESENT
SLC25A6	6	4						PRESENT
SLC9A6	6	4						PRESENT
SMS	6	6				TRUE
SNCB	6	4						PRESENT
SORD	6	4						PRESENT
SPOCK1	6	4						INCREASED
SPOCK3	6	5	TRUE							INCREASED
SPTBN1	6	3					PRESENT	PRESENT
SRGAP2	6	6		TRUE
SRSF2	6	3					PRESENT	DECREASED
SST	6	6		TRUE
STK24	6	6		TRUE	TRUE
STMN1	6	4						PRESENT
STRAP	6	5		TRUE				PRESENT
SUB1	6	5		TRUE				PRESENT
SUCLG2	6	5				TRUE		PRESENT
SYN2	6	4					PRESENT	PRESENT
SYP	6	4						PRESENT
TARDBP	6	3					DECREASED	DECREASED
TFG	6	4						INCREASED
TMEM163	6	4						DECREASED
TMEM65	6	4						PRESENT
TMX4	6	5		TRUE				PRESENT
TOMM34	6	4					INCREASED			INCREASED
TOMM70	6	4						PRESENT
TPD52	6	4						PRESENT
TRIM2	6	4						PRESENT
TRIM3	6	4						PRESENT
TSTD1	6	4						PRESENT
TUBA1A	6	4						PRESENT
TUBB2A	6	3					PRESENT	PRESENT
TXNL1	6	4						PRESENT
UBA6	6	5	TRUE		TRUE			PRESENT
UBE2O	6	3						PRESENT		INCREASED
UQCRFS1	6	3					PRESENT	PRESENT
UQCRH	6	4						PRESENT
VAT1L	6	4						PRESENT
VDAC1	6	3					PRESENT	PRESENT
VDAC2	6	3					PRESENT	PRESENT
VDAC3	6	4						PRESENT
WDR13	6	4						PRESENT
XRCC5	6	3					PRESENT	PRESENT
ZADH2	6	5		TRUE	TRUE			DECREASED
ABHD10	5	3						PRESENT
ABI1	5	2					PRESENT	PRESENT
ABLIM1	5	3						PRESENT
ACAD9	5	4						PRESENT
ACTR1B	5	3						PRESENT
ACTR3	5	3						PRESENT
ACYP1	5	3						PRESENT
ADGRB2	5	5		TRUE
ADGRL1	5	4						PRESENT
AGL	5	3						PRESENT
AHCY	5	3						PRESENT
AIP	5	3						PRESENT
AKAP5	5	5		TRUE
ALB	5	5	TRUE
ALDH6A1	5	2					PRESENT	PRESENT
ALDH7A1	5	2					PRESENT	PRESENT
ALDOA	5	2					PRESENT	PRESENT
ANKFY1	5	4						PRESENT
APPL1	5	3						PRESENT		INCREASED
ARF3	5	4					PRESENT
ARFGEF3	5	3						INCREASED
ARHGAP1	5	3						PRESENT
ARHGAP44	5	4						PRESENT
ARHGEF7	5	4						PRESENT
ARL6IP4	5	5	TRUE
ARL8B	5	3						INCREASED
ARMT1	5	5				TRUE
ARPC5L	5	3						PRESENT
ASPH	5	5	TRUE
ASTN1	5	5		TRUE
ATIC	5	3						PRESENT
ATP2B4	5	3						PRESENT
ATP5F1D	5	3						DECREASED
ATP5IF1	5	5				TRUE
ATP5MK	5	5				TRUE
ATP5PB	5	3						PRESENT
ATP6V1C1	5	3						PRESENT
ATP6V1G2	5	3						PRESENT
ATPAF1	5	4						PRESENT
AZGP1	5	2					PRESENT	DECREASED
B4GAT1	5	3						PRESENT
BCAP29	5	5		TRUE	TRUE
BCAS3	5	4						INCREASED
BLVRA	5	3						PRESENT
BRK1	5	3						PRESENT
C1QBP	5	3						PRESENT
CALB1	5	5		TRUE
CALB2	5	3						PRESENT
CAMK2G	5	3						PRESENT
CAMKK2	5	5		TRUE
CAPZA2	5	3						PRESENT
CAVIN2	5	5	TRUE		TRUE
CCT7	5	2					PRESENT	PRESENT
CCT8	5	2					PRESENT	PRESENT
CDKN1B	5	5	TRUE
CFB	5	5	TRUE		TRUE
CHL1	5	3						PRESENT
CHMP4B	5	2					PRESENT	PRESENT
CHP1	5	4						PRESENT
CIRBP	5	5		TRUE
CISD1	5	3						PRESENT
CLDN10	5	5	TRUE
CMAS	5	3					PRESENT	PRESENT
CMBL	5	4						PRESENT
CNN3	5	3						PRESENT		INCREASED
CNTN1	5	2					PRESENT	PRESENT
COA6	5	5		TRUE
COPS2	5	4						PRESENT
COPS5	5	3						PRESENT		INCREASED
COX4I1	5	2					PRESENT	PRESENT
COX7A2	5	3						PRESENT
COX7A2L	5	4						INCREASED
CSNK1E	5	3						PRESENT
CSNK2A1	5	4						PRESENT
CTBP1	5	3						PRESENT
CUL3	5	4						PRESENT
CYB5R1	5	3						PRESENT
CYFIP1	5	4						PRESENT
CZIB	5	5	TRUE
DARS1	5	3						PRESENT
DCXR	5	3						PRESENT
DDAH1	5	3						PRESENT
DDB1	5	2					PRESENT	PRESENT
DDX17	5	3					PRESENT	PRESENT
DDX5	5	3					PRESENT	PRESENT
DEK	5	5	TRUE
DGKZ	5	5		TRUE
DHRS7	5	4						INCREASED
DHX15	5	4						PRESENT
DMXL1	5	5				TRUE
DNAJA1	5	4						PRESENT
DNAJC5	5	2					INCREASED	PRESENT
ECH1	5	3						PRESENT
ECHS1	5	2					PRESENT	PRESENT
EEA1	5	4						PRESENT
EEF1A1	5	4					PRESENT
EIF3A	5	4						PRESENT
EIF4A1	5	3						DECREASED
EIF5	5	4						DECREASED
ELAVL2	5	5		TRUE
EMD	5	3						PRESENT
ENDOD1	5	3						PRESENT
EPB41L1	5	3						PRESENT
EPHX1	5	3						PRESENT
EPS15L1	5	3						PRESENT
ERO1A	5	4						PRESENT
EVL	5	5		TRUE
EXOC2	5	4						PRESENT
EXOC4	5	3					DECREASED	PRESENT
EXOC7	5	5		TRUE
FDX2	5	5		TRUE	TRUE
FDXR	5	3						PRESENT
FGF12	5	5		TRUE
FMN2	5	4						PRESENT
FNTA	5	3						PRESENT		INCREASED
FYN	5	3						PRESENT
G3BP2	5	5		TRUE
GABBR2	5	3						PRESENT
GAD2	5	4						PRESENT
GARS1	5	3						PRESENT
GATD1	5	4						PRESENT
GATM	5	4						INCREASED
GCDH	5	4						PRESENT
GDAP1L1	5	3						PRESENT
GDI1	5	2					PRESENT	PRESENT
GGA3	5	5		TRUE	TRUE
GGT7	5	3						PRESENT
GJB6	5	5		TRUE
GLO1	5	2					PRESENT	PRESENT
GLOD4	5	3						PRESENT
GNA11	5	3						PRESENT
GNAQ	5	3						PRESENT
GNAS	5	3						PRESENT
GNG3	5	3						PRESENT
GNG4	5	5		TRUE
GNG7	5	3						PRESENT
GPRIN1	5	3						PRESENT
GRIA1	5	4		TRUE				PRESENT
GSTM2	5	3						PRESENT
GSTZ1	5	5	TRUE
H1-3	5	5	TRUE
HADH	5	3						PRESENT
HADHB	5	2					PRESENT	PRESENT
HAPLN1	5	3						PRESENT
HBB	5	2					PRESENT	PRESENT
HDGF	5	5	TRUE
HEBP1	5	3						PRESENT
HMGA1	5	5	TRUE
HMGCS1	5	4					DECREASED
HNRNPA1	5	2					PRESENT	PRESENT
HNRNPA3	5	2					PRESENT	PRESENT
HNRNPC	5	2					PRESENT	PRESENT
HNRNPD	5	1					DECREASED	PRESENT
HNRNPR	5	2					PRESENT	PRESENT
HSD17B10	5	2					PRESENT	PRESENT
HSPA4	5	2					PRESENT	PRESENT
HSPH1	5	2					PRESENT	PRESENT
HTATSF1	5	5	TRUE
ICAM5	5	2					PRESENT	PRESENT
IGLL5	5	4						PRESENT
IGSF21	5	3						PRESENT
IGSF8	5	2					PRESENT	PRESENT
ILF2	5	4						PRESENT
ILF3	5	2					PRESENT	PRESENT
ISCU	5	5		TRUE
ITGAX	5	4						INCREASED
ITGB2	5	3						INCREASED		INCREASED
ITGB8	5	5	TRUE
IVD	5	3						PRESENT
JUP	5	1					PRESENT	PRESENT	TRUE
KBTBD11	5	3						PRESENT
KHSRP	5	2					PRESENT	PRESENT
KIAA1549L	5	5		TRUE
KPNB1	5	2					PRESENT	PRESENT
KRT2	5	4						PRESENT
LAP3	5	3						PRESENT
LARP1	5	4						DECREASED
LCMT1	5	5	TRUE
LGI4	5	4						INCREASED
LZTFL1	5	4						DECREASED
MAOA	5	3						PRESENT
MAP1A	5	2					PRESENT	PRESENT
MARK2	5	3						PRESENT
MAT2A	5	3						PRESENT
MCCC1	5	4						PRESENT
ME3	5	4						PRESENT
MFF	5	5		TRUE	TRUE
MFN2	5	4						PRESENT
MICOS10	5	5		TRUE
MIX23	5	4								DECREASED
MLIP	5	5		TRUE
MMAB	5	4								INCREASED
MOB4	5	5		TRUE
MRAS	5	4						PRESENT
MT-ND4	5	5		TRUE	TRUE
MTSS2	5	3						PRESENT
NANS	5	3						PRESENT		INCREASED
NCKIPSD	5	3						PRESENT
NCS1	5	4						PRESENT
NDUFA13	5	4						PRESENT
NDUFA4	5	3						PRESENT
NDUFA6	5	4						PRESENT
NDUFA7	5	3						PRESENT
NDUFB3	5	3						PRESENT
NDUFB5	5	4						PRESENT
NDUFS7	5	3						PRESENT
NEBL	5	3						PRESENT
NEGR1	5	4						PRESENT
NEK7	5	5	TRUE		TRUE
NFASC	5	2					PRESENT	PRESENT
NGEF	5	5		TRUE
NONO	5	3					PRESENT	PRESENT
NPM1	5	2					PRESENT	PRESENT
NPTXR	5	3						INCREASED
NT5C	5	5	TRUE
NTN3	5	5	TRUE
NUDC	5	3						PRESENT
NUDT4	5	4						PRESENT
NUMB	5	5		TRUE
OGT	5	3						PRESENT
OMG	5	3						PRESENT
OSBP	5	3					DECREASED	PRESENT
P0CG05	5	5	TRUE
PAK3	5	5		TRUE
PCBP1	5	2					PRESENT	PRESENT
PCCB	5	3						PRESENT
PCP4	5	5		TRUE
PCYOX1L	5	4								DECREASED
PCYT2	5	3						PRESENT
PDE1A	5	3						PRESENT
PDXK	5	3						PRESENT
PEX5L	5	4						PRESENT
PFDN6	5	4						DECREASED
PFKM	5	2					PRESENT	PRESENT
PGRMC1	5	2					PRESENT	PRESENT
PHB2	5	2					PRESENT	PRESENT
PHPT1	5	2						PRESENT		INCREASED
PHYHIP	5	2					PRESENT	PRESENT
PIN1	5	2					PRESENT	PRESENT
PLIN4	5	5	TRUE		TRUE
PLXDC2	5	5	TRUE
PMP2	5	2						PRESENT		DECREASED
PMPCB	5	4						PRESENT
PPP3CA	5	2					PRESENT	PRESENT
PRAF2	5	4						PRESENT
PREPL	5	3						PRESENT		INCREASED
PRKAA1	5	4						PRESENT
PRKAR2A	5	2					PRESENT	PRESENT
PRKAR2B	5	3						PRESENT
PRKCB	5	3						PRESENT
PRMT1	5	5		TRUE	TRUE
PRPSAP1	5	4								INCREASED
PRRT3	5	4						DECREASED
PRUNE2	5	5		TRUE
PSMA4	5	3						PRESENT
PSMB1	5	3						PRESENT
PSMB5	5	2					PRESENT	PRESENT
PSMC4	5	3						PRESENT
PSMD14	5	2					PRESENT	PRESENT
PSMD3	5	3						PRESENT
PSPC1	5	3					PRESENT	PRESENT
PTGR2	5	5	TRUE
PTPRS	5	3						PRESENT
R3HDM2	5	5		TRUE
RAB14	5	3						PRESENT
RAB18	5	3						PRESENT
RAB3C	5	3						PRESENT
RAB3GAP1	5	5		TRUE
RAB6A	5	3						PRESENT
RAB7A	5	2					PRESENT	PRESENT
RACK1	5	3						PRESENT
RAPGEF4	5	5		TRUE
RASAL2	5	5		TRUE
RBKS	5	5	TRUE
RBMX	5	2					PRESENT	PRESENT
RDH13	5	5		TRUE
REEP1	5	5		TRUE
REEP5	5	5		TRUE
RHOG	5	4						PRESENT
RHOT1	5	3						PRESENT
RPL15	5	1					DECREASED	PRESENT
RPL22	5	2					PRESENT	INCREASED
RPL24	5	3					DECREASED	PRESENT
RPL36	5	4						PRESENT
RPLP2	5	2					PRESENT	PRESENT
RPS11	5	2					DECREASED	PRESENT
RPS13	5	3						PRESENT
RPS14	5	1					DECREASED	PRESENT
RPS15	5	5				TRUE
RPS18	5	2					PRESENT	PRESENT
RPS5	5	3						PRESENT
RPS6KA5	5	5	TRUE
RPS9	5	3						PRESENT
RTN4RL2	5	4						PRESENT
RUFY3	5	2					PRESENT	PRESENT
RUVBL1	5	3						PRESENT
S100A8	5	2					PRESENT	DECREASED
SACM1L	5	4						PRESENT
SCG2	5	3						PRESENT
SEPTIN10	5	4						PRESENT
SEPTIN6	5	4						PRESENT
SH3GL3	5	3						PRESENT
SHISA7	5	5		TRUE
SIRT2	5	3						PRESENT
SLC25A12	5	2					PRESENT	PRESENT
SLC27A4	5	5		TRUE
SLC39A10	5	5		TRUE
SLC39A12	5	5	TRUE
SLC4A1	5	5	TRUE		TRUE
SLC6A17	5	3						PRESENT
SLK	5	4						DECREASED
SMAP1	5	4						DECREASED
SMAP2	5	4						PRESENT
SMPD3	5	4						DECREASED
SND1	5	2					PRESENT	PRESENT
SNRNP70	5	4						PRESENT
SNRPA	5	5				TRUE
SNTA1	5	3						PRESENT
SNX2	5	3						PRESENT		INCREASED
SNX4	5	4						PRESENT
SPARCL1	5	3						INCREASED
SRCIN1	5	3						PRESENT
ST13	5	2					PRESENT	PRESENT
STK32C	5	3						PRESENT
STRN4	5	5		TRUE
STXBP5L	5	5		TRUE
STXBP6	5	4						DECREASED
SULT4A1	5	4						PRESENT
SYN3	5	3						PRESENT
SYNE1	5	5		TRUE	TRUE
SYT2	5	5	TRUE		TRUE
TALDO1	5	2					PRESENT	PRESENT
TBCA	5	3						PRESENT
TBCC	5	4						PRESENT
TCP11L1	5	4						PRESENT
TFAM	5	3						PRESENT
TIPRL	5	4						PRESENT
TMOD1	5	4						PRESENT
TNR	5	2					PRESENT	PRESENT
TOLLIP	5	2					INCREASED	PRESENT
TOM1	5	2					PRESENT	PRESENT
TPM1	5	2					PRESENT	PRESENT
TPM4	5	3						PRESENT
TPP2	5	5		TRUE	TRUE
TUBA1B	5	2					PRESENT	PRESENT
TUBA8	5	3						PRESENT
TUBB2B	5	3						PRESENT
TUBB4B	5	2					PRESENT	PRESENT
TUBB6	5	4						PRESENT
TXN	5	2					PRESENT	PRESENT
TXNRD1	5	3						PRESENT		INCREASED
UBE2D3	5	4								INCREASED
UBE2I	5	5	TRUE
UBE2L3	5	4						PRESENT
UNC13A	5	4						PRESENT
UQCR10	5	5		TRUE	TRUE
UQCRC2	5	3						PRESENT
USP7	5	4						PRESENT
VAC14	5	4						PRESENT
VAT1	5	3						PRESENT
VCP	5	2					PRESENT	PRESENT
VPS51	5	4						PRESENT
XPO1	5	4						PRESENT
COX6C	5	2					PRESENT	PRESENT
MOG	5	3						PRESENT
AAMP	4	4
ACACA	4	2						PRESENT
ACO1	4	3						PRESENT
ACSL1	4	2					DECREASED	INCREASED
ACTR1A	4	2						PRESENT
ADAM10	4	4
ADGRG1	4	4
AGT	4	3						PRESENT
AHCYL2	4	2						PRESENT
AJM1	4	3						PRESENT
AK3	4	2						PRESENT
AK4	4	2						PRESENT
ALCAM	4	2						PRESENT
ALDH3A2	4	2						PRESENT
ALDH5A1	4	1					PRESENT	PRESENT
ALDOC	4	1					PRESENT	PRESENT
AMER2	4	3						PRESENT
ANXA3	4	2						PRESENT		DECREASED
ANXA7	4	2						PRESENT
AP3S1	4	4
APPL2	4	3						INCREASED
ARC	4	4
ARF5	4	4
ARFGAP1	4	2						DECREASED
ARFGAP2	4	4
ARFIP2	4	3						PRESENT
ARHGAP26	4	3						DECREASED
ARL15	4	4
ARL8A	4	1					PRESENT	PRESENT
ARMC10	4	4
ARPC2	4	2						PRESENT
ARPC5	4	3						PRESENT
ATAD1	4	4
ATAD3A	4	2						PRESENT
ATG9A	4	3						INCREASED
ATP5F1B	4	2						PRESENT
ATP5F1C	4	2						PRESENT
ATP5ME	4	2						DECREASED
ATP5MG	4	2						PRESENT
ATP6AP1	4	2						PRESENT
ATP6V0C	4	4
ATXN10	4	3						PRESENT
BCKDHB	4	4
BPNT1	4	3						PRESENT
BRINP1	4	4
BRSK1	4	3						PRESENT
C11orf54	4	4
C12orf57	4	4
C2CD4C	4	4
C4BPA	4	2						INCREASED		INCREASED
CA1	4	2						PRESENT
CAB39	4	3						PRESENT
CACNG8	4	4
CACYBP	4	2						PRESENT
CADM1	4	3						INCREASED
CADPS2	4	4
CALD1	4	4
CALU	4	4
CAMK2D	4	2						PRESENT
CAND1	4	1					PRESENT	PRESENT
CANX	4	1					PRESENT	PRESENT
CAPN1	4	2						PRESENT
CARS1	4	2						PRESENT
CCDC22	4	3						INCREASED
CCK	4	3						PRESENT
CCNY	4	3						PRESENT
CCT2	4	1					PRESENT	PRESENT
CD81	4	3						PRESENT
CDC42EP4	4	2						PRESENT
CDH13	4	3						PRESENT
CDS2	4	1					PRESENT	PRESENT
CEP170	4	3						DECREASED
CFL2	4	1					PRESENT	PRESENT
CHML	4	4
CHN1	4	3						PRESENT
CKAP4	4	3					PRESENT
CKAP5	4	3						PRESENT
CLASP2	4	2						PRESENT
CLCN6	4	3						INCREASED
CLDN11	4	3						PRESENT
CLINT1	4	4
CLIP2	4	2						PRESENT
CNKSR2	4	3						PRESENT
CNTN2	4	2						PRESENT
CNTNAP1	4	2						PRESENT
CNTNAP2	4	2						PRESENT
COA7	4	4
COL1A1	4	2						INCREASED
COL6A3	4	3						PRESENT
COPB2	4	3						DECREASED
COPS7B	4	3								INCREASED
CORO1B	4	2						PRESENT
CORO1C	4	2						PRESENT
COX7C	4	4
CRBN	4	4
CRYZ	4	1					PRESENT	PRESENT
CSE1L	4	2						PRESENT
CSNK1A1	4	3					INCREASED
CSTA	4	1					PRESENT	DECREASED
CTNNB1	4	2						PRESENT
CTNND2	4	2						PRESENT
CTSB	4	2						INCREASED
CUL1	4	3						PRESENT
CUL2	4	3								INCREASED
DCTN2	4	1					PRESENT	PRESENT
DCTN3	4	2						PRESENT
DDT	4	1						PRESENT		INCREASED
DECR1	4	1					PRESENT	PRESENT
DGKB	4	3						PRESENT
DGKG	4	4
DGKH	4	4
DIAPH1	4	4
DLGAP2	4	4
DNAJA3	4	2						PRESENT
DNAJB6	4	2						PRESENT
DNAJC11	4	3						PRESENT
DNPH1	4	2						PRESENT
DOCK3	4	4
DOCK4	4	2					DECREASED	PRESENT
DYNC1I2	4	2						PRESENT
DYNLL1	4	2						PRESENT
EFHD2	4	2						PRESENT
EIF2S3	4	2						PRESENT
EIF3D	4	4
EIF3J	4	3						PRESENT
EIF3L	4	2						PRESENT		INCREASED
EIF5A	4	2						PRESENT
ELAVL1	4	2						PRESENT
EMC1	4	4
EPRS1	4	2						PRESENT
ERBIN	4	4
ESYT2	4	3						PRESENT
ETFB	4	1					PRESENT	PRESENT
EXOC3	4	3						PRESENT
FAHD1	4	3						PRESENT
FARP1	4	2						PRESENT
FBLN1	4	3								INCREASED
FDPS	4	2						INCREASED
FECH	4	3						PRESENT
FLNC	4	4
FLOT2	4	2						PRESENT
FMNL2	4	3						PRESENT
FN3K	4	2						PRESENT
FRZB	4	3						INCREASED
GABARAP	4	4
GABRB1	4	3						PRESENT
GALK1	4	3						PRESENT
GAR1	4	4
GART	4	4
GET3	4	3						PRESENT
GFM1	4	3						PRESENT
GFUS	4	3						DECREASED
GGCT	4	1					PRESENT	DECREASED
GK	4	4
GMFB	4	2						PRESENT
GNG5	4	4
GOT1	4	1					PRESENT	PRESENT
GPC4	4	3						INCREASED
GPC5	4	3						INCREASED
GPS1	4	2						PRESENT
GRSF1	4	4
GSR	4	2						PRESENT
GSTM5	4	3								INCREASED
GSTO1	4	2						PRESENT
H1-10	4	3								DECREASED
H2AC21	4	4
HACD3	4	2						PRESENT
HBD	4	2						PRESENT
HDGFL3	4	4
HIBADH	4	2						PRESENT
HNRNPDL	4	3						PRESENT
HOOK3	4	3						INCREASED
HRAS	4	3						PRESENT
IGLC3	4	1					PRESENT	PRESENT		DECREASED
INPP5A	4	4
IQSEC2	4	2						PRESENT
ITGA6	4	3						PRESENT
ITM2B	4	4
ITPKA	4	2						PRESENT
ITPKB	4	4
ITPR1	4	3						PRESENT
JAM3	4	3						INCREASED
K7EL21	4	3						PRESENT
KATNAL1	4	4
KCNJ4	4	4
KCNMA1	4	4
KIAA1549	4	4
KIF13B	4	4
KIF1A	4	2						PRESENT
KIF21A	4	2						PRESENT
KIF2A	4	2						PRESENT
KLC1	4	2						PRESENT
LAMC1	4	2						PRESENT
LAMTOR3	4	4
LASP1	4	2						PRESENT
LCLAT1	4	4
LMO7	4	4
LRTM2	4	4
LSM2	4	3						PRESENT
LSP1	4	4
LYRM4	4	2						PRESENT
LZIC	4	4
MAIP1	4	4
MAP1B	4	1					PRESENT	PRESENT
MAP1LC3A	4	3						PRESENT
MAP2K6	4	4
MAP4K3	4	4
MAPK10	4	3						PRESENT
MARCKSL1	4	1						INCREASED		DECREASED
MARS1	4	3						PRESENT
MAT2B	4	2						PRESENT
MBOAT7	4	3						PRESENT
ME2	4	2						PRESENT
METTL7A	4	2						PRESENT
MIF	4	1					PRESENT	INCREASED
MPC2	4	3								INCREASED
MRPL15	4	3								DECREASED
MRPL49	4	4
MRPS27	4	4
MRPS31	4	4
MRPS34	4	4
MT-CO2	4	2						PRESENT
MT1E	4	4
MT2A	4	4
MTARC2	4	3						PRESENT
MVD	4	2						PRESENT
MYDGF	4	4
MYL12A	4	2						PRESENT
MYL6	4	1					PRESENT	PRESENT
NADK2	4	2						PRESENT
NAPA	4	2						PRESENT
NCK2	4	3						PRESENT
NDP	4	1						INCREASED		INCREASED
NDRG1	4	2						PRESENT
NDUFA11	4	3						INCREASED
NDUFB11	4	3						PRESENT
NDUFB6	4	3						INCREASED
NDUFS5	4	2						PRESENT
NES	4	4
NISCH	4	4
NME1	4	3						PRESENT
NOCT	4	4
NPTX1	4	2						INCREASED
NQO1	4	2					INCREASED	PRESENT
NRIP2	4	4
NRXN2	4	2						INCREASED		INCREASED
NSFL1C	4	2						PRESENT
NUDT2	4	4
NUDT3	4	2						PRESENT
NUTF2	4	4
OLFM2	4	4
OSBPL3	4	4
OSTF1	4	3						INCREASED
PA2G4	4	1					PRESENT	PRESENT
PAFAH1B2	4	1						INCREASED		INCREASED
PALLD	4	4
PARS2	4	3						INCREASED
PARVA	4	3								INCREASED
PCCA	4	1					PRESENT	PRESENT
PDE4A	4	4
PDIA6	4	1					PRESENT	PRESENT
PDK2	4	3						INCREASED
PDLIM5	4	2						PRESENT
PDP1	4	4
PFDN1	4	2						PRESENT
PGAM5	4	2						PRESENT
PI16	4	4
PI4KA	4	3						PRESENT
PICALM	4	4
PIP4K2A	4	1						PRESENT		INCREASED
PIP4K2B	4	2						PRESENT
PITHD1	4	2						PRESENT
PITPNB	4	4
PKIA	4	3						PRESENT
PLLP	4	4
PMM1	4	4
PMPCA	4	4
PMVK	4	3						PRESENT
PPFIA2	4	2						PRESENT
PPM1B	4	4
PPP2CB	4	4
PPP2R2A	4	2						PRESENT
PPP2R2C	4	4
PPP2R5C	4	4
PRKAR1A	4	1					PRESENT	PRESENT
PRKAR1B	4	3						DECREASED
PRKCD	4	4
PRKCSH	4	1					PRESENT	PRESENT
PRMT5	4	3						PRESENT
PRPF19	4	4
PSD	4	3						PRESENT
PSD2	4	4
PSMB2	4	2						PRESENT
PSMB3	4	3						PRESENT
PSMB4	4	3						PRESENT
PSMB6	4	2						PRESENT
PSMC6	4	2						PRESENT
PSMD11	4	2						PRESENT
PSMD12	4	3						PRESENT
PSMF1	4	2						INCREASED		INCREASED
PTGFRN	4	3						PRESENT
PTGR1	4	3						PRESENT
PTMS	4	4
PTPN11	4	2						PRESENT
QKI	4	3						PRESENT
RAB11FIP5	4	3						PRESENT
RAB2A	4	2						PRESENT
RAB4B	4	2						PRESENT
RAB8B	4	2						INCREASED
RANBP2	4	4
RAPH1	4	4
RASA2	4	4
RBBP4	4	3						PRESENT
RBP1	4	2						PRESENT		INCREASED
RCN2	4	3						PRESENT
RETREG2	4	3						PRESENT
RFTN2	4	4
RGS6	4	3						PRESENT
ROGDI	4	2						PRESENT
RPL10	4	4
RPL10A	4	1					PRESENT	PRESENT
RPL13A	4	1					PRESENT	PRESENT
RPL17	4	3						PRESENT
RPL18	4	2						PRESENT
RPL23	4	3					DECREASED
RPL27	4	1					PRESENT	PRESENT
RPL3	4	3						DECREASED
RPL30	4	2						PRESENT
RPL32	4	4
RPL34	4	2						DECREASED
RPL9; RPL9P7; RPL9P8; RPL9P9	4	4
RPS15A	4	3						PRESENT
RPS19	4	2					PRESENT	PRESENT
RPS20	4	1					PRESENT	PRESENT
RPS23	4	2					DECREASED	PRESENT
RPS26	4	2						PRESENT
RPS27A	4	4
RPS7	4	2					PRESENT	PRESENT
RTCB	4	2						PRESENT
S100A4	4	4
S1PR1	4	4
SAE1	4	4
SDHC	4	4
SEC22B	4	2						PRESENT
SEC24C	4	3						PRESENT
SEMA7A	4	3						PRESENT
SEPTIN9	4	2						PRESENT
SERPINB6	4	2						PRESENT
SERPINC1	4	1						PRESENT		INCREASED
SET	4	1					PRESENT	PRESENT
SH2D5	4	4
SLC16A1	4	4
SLC25A18	4	4
SLC2A1	4	3						DECREASED
SLC3A2	4	2						PRESENT
SLC44A2	4	2						PRESENT
SLC4A8	4	4
SLC8A3	4	4
SNRPD1	4	4
SNTB1	4	2						PRESENT
SNX1	4	2						PRESENT
SNX27	4	2						PRESENT
SPIRE1	4	3						PRESENT
SRC	4	2						PRESENT
SRM	4	2						PRESENT
SRSF3	4	2						INCREASED
STAT3	4	3						PRESENT
STK39	4	4
STMN3	4	4
STUB1	4	3						DECREASED
SYAP1	4	4
SYNCRIP	4	3						PRESENT
SYT11	4	3						INCREASED
TAGLN	4	3								INCREASED
TF	4	2						PRESENT
TGFBI	4	1						INCREASED		INCREASED
THTPA	4	4
TIMM8A	4	2						INCREASED		DECREASED
TIMM9	4	2						PRESENT		DECREASED
TMEFF2	4	2						INCREASED
TMEM126A	4	4
TMSB4X	4	1					PRESENT	PRESENT
TNPO3	4	4
TUBB8	4	2						PRESENT
UBA2	4	2					PRESENT	PRESENT
UBAP2L	4	4
UBE2K	4	2						PRESENT
UBE3A	4	3					DECREASED
UBQLN2	4	2						DECREASED
UPF1	4	3						PRESENT
USO1	4	2						PRESENT
USP5	4	1					PRESENT	PRESENT
VBP1	4	3						PRESENT
VPS26B	4	2						PRESENT
VPS52	4	3						PRESENT
WDR47	4	2						PRESENT
WFS1	4	2						PRESENT
YES1	4	4
ZC2HC1A	4	4
ZDHHC5	4	4
RPL31	4	1					PRESENT	DECREASED
ELAVL4	4						DECREASED	PRESENT
CAPZB	4	1					PRESENT	PRESENT
GDI2	4	1					PRESENT	PRESENT
RPL7A	4	1					PRESENT	PRESENT
ACTB	4	1					PRESENT	PRESENT
BCAN	4	1					PRESENT	PRESENT
DSP	4						PRESENT	PRESENT	TRUE
SERPINB12	4						PRESENT	PRESENT	TRUE
KYAT3	4	3						PRESENT
CADM4	4	2						PRESENT
L1CAM	4	2						PRESENT
A0A087X0T3	3	3
A0A0A0MS52	3	3
A0A0C4DH03	3	3
ABCB8	3	3
ABCC5	3	3
ABHD11	3	2						PRESENT
ABHD16A	3	2						PRESENT
ABRACL	3	3
ACADVL	3	1						PRESENT
ACBD7	3	1						PRESENT
ACOT1	3	1						PRESENT
ACOT13	3	1						PRESENT
ACSL6	3	2						PRESENT
ACSS3	3	2						PRESENT
ACTR10	3	3
ADCY1	3	3
ADGRA1	3	3
ADGRB1	3	3
ADK	3	3
ADSS2	3	2						PRESENT
AFAP1L2	3	3
AGFG1	3	3
AGPAT3	3	3
AHNAK2	3	3
ALPL	3	2								DECREASED
ANK3	3	1						PRESENT
ANLN	3	2						PRESENT
ANP32A	3	3
APBB1	3	3
APC	3	3
APLP1	3	2						PRESENT
ARF1	3	1						PRESENT
ARF4	3	2						PRESENT
ARHGAP23	3	3
ARHGAP5	3	3
ARHGDIB	3	2								INCREASED
ARL1	3	3
ARPC1B	3	1						INCREASED
ARPC3	3	1						PRESENT
ARR3	3	3
ASRGL1	3	1						PRESENT
ATG4B	3	3
ATP5MJ	3	3
ATP6V0D2	3	1						INCREASED
ATP9A	3	1						INCREASED
ATXN2L	3	3
B2M	3	3
BAG6	3	1						PRESENT
BANF1	3	3
BCAS1	3	3
BCAT1	3	3
BCKDHA	3	2						PRESENT
BCKDK	3	3
BCL2L2	3	3
BEGAIN	3	3
BIN1	3	1						PRESENT
BOLA2; BOLA2B	3	2						PRESENT
BZW1	3	3
BZW2	3	3
C1orf198	3	2						PRESENT
C1QA	3	2						INCREASED
C2CD2	3	3
CA8	3	3
CACNA1E	3	2						PRESENT
CACNB3	3	3
CACNG2	3	3
CAMK1	3	2						PRESENT
CAMK1D	3	1						PRESENT
CAMK1G	3	3
CAMSAP1	3	3
CAPN7	3	3
CARHSP1	3	2						PRESENT
CAST	3	3
CBARP	3	3
CBLN4	3	3
CCDC136	3	3
CD63	3	3
CDH9	3	3
CDIP1	3	2						DECREASED
CETN2	3	3
CFH	3	2						PRESENT
CHGB	3	1						PRESENT
CIAPIN1	3	3
CKM	3	1						INCREASED
CLPTM1	3	3
CMC1	3	2								DECREASED
CMPK1	3	1						PRESENT
COL11A1	3	3
COL18A1	3	2						PRESENT
COL1A2	3	1						INCREASED
COMT	3	2						PRESENT
COPA	3	2						PRESENT
COPS8	3	2						INCREASED
CPM	3	3
CPNE4	3	3
CPPED1	3	2						PRESENT
CPSF6	3	3
CPT2	3	2						PRESENT
CRTAC1	3	1						INCREASED
CSK	3	3
CUL5	3	2						PRESENT
CUTA	3	1						DECREASED
CYB5A	3	2								DECREASED
CYBB	3	2						INCREASED
CYP4F11	3	3
CYTH1	3	3
D3DTX6	3	2						PRESENT
DAAM2	3	2						PRESENT
DAG1	3	3
DARS2	3	3
DDRGK1	3	2						DECREASED
DDX24	3	3
DDX6	3	2						PRESENT
DEFA1; DEFA1B	3	2						DECREASED
DEFA3	3	1					PRESENT	PRESENT
DENR	3	3
DGKI	3	3
DGLUCY	3	2						PRESENT
DHRS7B	3	3
DLGAP4	3	3
DNAJB4	3	2						PRESENT
DYNLRB1	3	1						PRESENT
DYNLT3	3	2						PRESENT
ECI1	3	2						PRESENT
EFEMP1	3	2								INCREASED
EFHD1	3	3
EIF2S1	3	1						PRESENT
EIF4B	3	1						PRESENT
EIF4E	3	2						DECREASED
ELANE	3	3
ENO3	3	3
ENPP6	3	2						DECREASED
ENSA	3	3
EPHX4	3	3
ERH	3	1						INCREASED		DECREASED
ERP29	3	2						PRESENT
ETFA	3	1						PRESENT
ETFDH	3	2						PRESENT
EVI5L	3	3
EXOC1	3	2						PRESENT
EXOC8	3	2						PRESENT
F13A1	3	3
F5H126	3	3
FAHD2A	3	2						PRESENT
FAM120A	3	3
FAM171A1	3	2						PRESENT
FBXL18	3	3
FIBP	3	3
FKBP3	3	1						PRESENT
FKBP5	3	1						PRESENT		INCREASED
FKBP8	3	2						PRESENT
FUBP1	3	1					PRESENT	PRESENT
FXR1	3	2					PRESENT
GABARAPL2	3	1						PRESENT
GABBR1	3	2						PRESENT
GABRB2	3	3
GABRG2	3	3
GAD1	3	3
GCSH	3	3
GDF10	3	2						INCREASED
GHITM	3	3
GIMAP1	3	3
GIT1	3	1						PRESENT
GLIPR2	3	2						PRESENT
GLRX3	3	3
GM2A	3	3
GMPR2	3	3
GNG13	3	3
GOLGA7B	3	3
GPD1L	3	1						PRESENT
GPT	3	3
GPX4	3	1						PRESENT
GRAMD4	3	3
GRIPAP1	3	1						PRESENT
[truncated: 3,312 more rows]

## Sheet: All dfPPIvsNeuroPro
Protein IDs	Number of proteins	Protein names	Gene names	Fasta headers	Intensity 7 NCI F	Intensity 13 NCI F	Intensity 16 NCI F	Intensity 203 NCI F	Intensity 207 NCI F	Intensity 219 NCI F	Intensity 426 NCI F	Intensity 10 NCI M	Intensity 27 NCI M	Intensity 28 NCI M	Intensity 53 NCI M	Intensity 99 NCI M	Intensity 200 NCI M	Intensity 221 NCI M	Intensity 223 NCI M	Intensity 423 NCI M	Intensity 424 NCI M	Intensity 425 NCI M	Intensity 427 NCI M	Intensity 126 MCI F	Intensity 160 MCI F	Intensity 276 MCI F	Intensity 325 MCI F	Intensity 328 MCI F	Intensity 422 MCI F	Intensity 29 MCI M	Intensity 124 MCI M	Intensity 161 MCI M	Intensity 326 MCI M	Intensity 1 AD F	Intensity 2 AD F	Intensity 5 AD F	Intensity 11 AD F	Intensity 17 AD F	Intensity 49 AD F	Intensity 50 AD F	Intensity 52 AD F	Intensity 55 AD F	Intensity 96 AD F	Intensity 148 AD F	Intensity 185 AD F	Intensity 187 AD F	Intensity 188 AD F	Intensity 189 AD F	Intensity 191 AD F
P07900-2;P07900	3	Heat shock protein HSP 90-alpha	HSP90AA1	sp|P07900-2|HS90A-2_HUMAN Isoform of P07900, Isoform 2 of Heat shock protein HSP 90-alpha OS=Homo sapiens OX=9606 GN=HSP90AA1 PE=1 SV=5;sp|P07900|HS90A_HUMAN Heat shock protein HSP 90-alpha OS=Homo sapiens OX=9606 GN=HSP90AA1 PE=1 SV=5	200010000000	207980000000	172580000000	208330000000	164380000000	489780000000	27206000000	296480000000	192050000000	257920000000	165940000000	93172000000	532890000000	111530000000	213470000000	688760000000	543660000000	113590000000	197900000000	280280000000	127280000000	348860000000	386640000000	527600000000	326860000000	92660000000	372270000000	644320000000	206890000000	140080000000	167450000000	28029000000	178630000000	236780000000	127390000000	115950000000	122700000000	156490000000	171830000000	165370000000	137920000000	627640000000	739060000000	348960000000	312180000000
P11142;P11142-2	6	Heat shock cognate 71 kDa protein	HSPA8	sp|P11142|HSP7C_HUMAN Heat shock cognate 71 kDa protein OS=Homo sapiens OX=9606 GN=HSPA8 PE=1 SV=1;sp|P11142-2|HSP7C-2_HUMAN Isoform of P11142, Isoform 2 of Heat shock cognate 71 kDa protein OS=Homo sapiens OX=9606 GN=HSPA8 PE=1 SV=1	52790000000	27163000000	21887000000	31332000000	15798000000	77314000000	11541000000	41024000000	21325000000	35504000000	30553000000	18312000000	88077000000	10816000000	34255000000	59520000000	96636000000	13634000000	27079000000	35567000000	34655000000	33579000000	60933000000	117700000000	53262000000	31453000000	117570000000	163690000000	32694000000	66296000000	109380000000	18486000000	41552000000	24963000000	19644000000	25580000000	84835000000	42816000000	114760000000	28188000000	94876000000	101250000000	124930000000	113210000000	45326000000
P08238	1	Heat shock protein HSP 90-beta	HSP90AB1	sp|P08238|HS90B_HUMAN Heat shock protein HSP 90-beta OS=Homo sapiens OX=9606 GN=HSP90AB1 PE=1 SV=4	36020000000	25314000000	45956000000	17433000000	26633000000	27471000000	378880000	58469000000	30598000000	111080000000	29958000000	15937000000	35895000000	13489000000	52256000000	170380000000	59409000000	27982000000	49781000000	43374000000	20229000000	104560000000	117270000000	96437000000	69287000000	19466000000	60007000000	127670000000	61441000000	9634500000	14326000000	1361500000	34175000000	18511000000	20735000000	6967800000	14845000000	14854000000	17166000000	31083000000	4712500000	118030000000	70006000000	16592000000	49270000000
P10809	8	60 kDa heat shock protein, mitochondrial	HSPD1	sp|P10809|CH60_HUMAN 60 kDa heat shock protein, mitochondrial OS=Homo sapiens OX=9606 GN=HSPD1 PE=1 SV=2	13800000000	12495000000	13648000000	8784300000	2339700000	60219000000	65593000000	18313000000	11734000000	24259000000	10673000000	1239200000	58614000000	3382400000	18703000000	60565000000	209540000000	12096000000	17229000000	8898500000	13601000000	24251000000	23202000000	31059000000	28702000000	26909000000	21216000000	149500000000	15786000000	149910000000	62961000000	6228300000	28665000000	37471000000	1659500000	10871000000	22388000000	8116400000	9769000000	13294000000	28153000000	9373300000	30191000000	42932000000	31132000000
P14625	6	Endoplasmin	HSP90B1	sp|P14625|ENPL_HUMAN Endoplasmin OS=Homo sapiens OX=9606 GN=HSP90B1 PE=1 SV=1	9808600000	11820000000	11644000000	7121400000	9556400000	12263000000	22382000000	13097000000	7458100000	9429800000	9638900000	3823300000	21741000000	3266000000	13811000000	40415000000	48532000000	8539500000	15086000000	16185000000	8002700000	21455000000	9202400000	53217000000	18505000000	12153000000	14531000000	55786000000	17981000000	7337000000	7695200000	734920000	29023000000	14365000000	5600100000	4038000000	8985300000	4843800000	4575600000	11350000000	8916800000	17859000000	69764000000	12142000000	48751000000
Q16543;K7EKQ2;K7EQA9	4	Hsp90 co-chaperone Cdc37;Hsp90 co-chaperone Cdc37, N-terminally processed	CDC37	sp|Q16543|CDC37_HUMAN Hsp90 co-chaperone Cdc37 OS=Homo sapiens OX=9606 GN=CDC37 PE=1 SV=1;tr|K7EKQ2|K7EKQ2_HUMAN Isoform of Q16543, Hsp90 co-chaperone Cdc37 (Fragment) OS=Homo sapiens OX=9606 GN=CDC37 PE=1 SV=1;tr|K7EQA9|K7EQA9_HUMAN Isoform of Q16543, Hsp	1874100000	5189000000	4482400000	2966200000	11475000000	2486600000	1560200000	6916800000	3273200000	4880600000	3784800000	5718800000	11155000000	1161800000	80050000000	5977200000	11790000000	1706400000	3231600000	11101000000	6205400000	3563300000	5441900000	12492000000	31113000000	834760000	33810000000	67765000000	4679400000	2070500000	8017800000	8577700000	3207700000	3361700000	2387200000	2139400000	4072300000	406110000	7115900000	4940700000	8631300000	39276000000	24181000000	3355300000	27068000000
A0A0G2JIW1;P0DMV9;P0DMV8;P0DMV8-2;V9GZ37	5	Heat shock 70 kDa protein 1B;Heat shock 70 kDa protein 1A	HSPA1B	tr|A0A0G2JIW1|A0A0G2JIW1_HUMAN Isoform of P0DMV9, Heat shock 70 kDa protein 1B OS=Homo sapiens OX=9606 GN=HSPA1B PE=1 SV=1;sp|P0DMV9|HS71B_HUMAN Heat shock 70 kDa protein 1B OS=Homo sapiens OX=9606 GN=HSPA1B PE=1 SV=1;sp|P0DMV8|HS71A_HUMAN Heat shock 70 kD	11547000000	6735600000	7547600000	5643500000	2190700000	19498000000	3541100000	9527000000	2959800000	3536700000	5980400000	2205600000	7521300000	1838900000	5443000000	6530400000	28694000000	1474500000	3587600000	5350800000	7681500000	6212500000	7622800000	46120000000	9572700000	17661000000	20075000000	47617000000	4722900000	36677000000	35848000000	5786400000	15372000000	8540400000	2210900000	6382000000	19422000000	10624000000	20432000000	4271300000	31319000000	9827800000	31309000000	29866000000	9725700000
Q92598-2;Q92598;Q92598-3;Q92598-4;A0A0A0MSM0	7	Heat shock protein 105 kDa	HSPH1	sp|Q92598-2|HS105-2_HUMAN Isoform of Q92598, Isoform Beta of Heat shock protein 105 kDa OS=Homo sapiens OX=9606 GN=HSPH1 PE=1 SV=1;sp|Q92598|HS105_HUMAN Heat shock protein 105 kDa OS=Homo sapiens OX=9606 GN=HSPH1 PE=1 SV=1;sp|Q92598-3|HS105-3_HUMAN Isoform	2140800000	4161400000	4576700000	3714400000	1106200000	5263600000	144400000	6554900000	3417100000	4324300000	2813800000	2549100000	14759000000	2624000000	14676000000	25470000000	5369400000	3405400000	3621100000	17062000000	1445500000	4051100000	11701000000	14603000000	14735000000	881310000	79273000000	12174000000	14070000000	2653100000	4708500000	1643400000	2308500000	3279500000	1534300000	1903100000	5264700000	2679700000	8647400000	4415300000	6490700000	40806000000	14198000000	17206000000	11343000000
P11021	1	78 kDa glucose-regulated protein	HSPA5	sp|P11021|BIP_HUMAN Endoplasmic reticulum chaperone BiP OS=Homo sapiens OX=9606 GN=HSPA5 PE=1 SV=2	29453000000	2572500000	1969000000	2619500000	910460000	12560000000	1188700000	3324700000	1558800000	2013600000	3332800000	718450000	8139100000	763610000	2942900000	10690000000	11760000000	1405700000	3155000000	2048600000	16911000000	3740100000	1445500000	21689000000	4230000000	4029000000	6008700000	20954000000	1637600000	5047500000	7550000000	832130000	5041000000	3832300000	982770000	1108600000	5119100000	1958300000	3667300000	2781900000	3689000000	6737600000	12817000000	9206300000	3662900000
P04792	3	Heat shock protein beta-1	HSPB1	sp|P04792|HSPB1_HUMAN Heat shock protein beta-1 OS=Homo sapiens OX=9606 GN=HSPB1 PE=1 SV=2	46732000000	1909800000	2119800000	3620700000	409790000	3418800000	342960000	1620400000	370610000	290660000	637610000	100460000	3043600000	1033800000	2838100000	2665000000	538170000	1456800000	678740000	3882700000	17389000000	2749900000	2954300000	46692000000	10161000000	816370000	2281700000	5353200000	763980000	543040000	1491800000	110230000	1537300000	681300000	828330000	238440000	854110000	19854000	1322400000	1802200000	687760000	16739000000	19276000000	2248700000	1314200000
P38646	10	Stress-70 protein, mitochondrial	HSPA9	sp|P38646|GRP75_HUMAN Stress-70 protein, mitochondrial OS=Homo sapiens OX=9606 GN=HSPA9 PE=1 SV=2	7740800000	1660800000	1722400000	979010000	287320000	11351000000	3038200000	1722700000	1601900000	3210300000	1762900000	416840000	5911800000	579840000	3814100000	12225000000	23370000000	2671300000	3346400000	2163700000	1348700000	4162000000	4516800000	6583900000	4335000000	5312500000	4955100000	19778000000	1800900000	15319000000	10568000000	948710000	6115700000	4581800000	644470000	1189400000	4088400000	1128300000	2047700000	1085500000	8704600000	9911400000	5814100000	9349100000	3340700000
P34932	1	Heat shock 70 kDa protein 4	HSPA4	sp|P34932|HSP74_HUMAN Heat shock 70 kDa protein 4 OS=Homo sapiens OX=9606 GN=HSPA4 PE=1 SV=4	1351600000	2163300000	1626000000	1301600000	456020000	3408900000	66830000	3628200000	1826900000	2025000000	1632400000	1575000000	5164300000	472320000	1519800000	3544000000	5865500000	1204100000	1290300000	3239200000	737630000	1513200000	1736700000	8664200000	3904700000	1174200000	4179400000	6415300000	3326400000	11508000000	8443200000	1285800000	2727000000	1552700000	819800000	1178400000	5147300000	2413500000	7875000000	1917400000	7511900000	3569100000	7520400000	8382700000	3764400000
P54652	1	Heat shock-related 70 kDa protein 2	HSPA2	sp|P54652|HSP72_HUMAN Heat shock-related 70 kDa protein 2 OS=Homo sapiens OX=9606 GN=HSPA2 PE=1 SV=1	8722300000	834120000	1459200000	2032500000	459900000	4875600000	282570000	980070000	696170000	670250000	627200000	535990000	987730000	552110000	1244500000	742910000	2137800000	1768600000	2248900000	2445400000	1568000000	784950000	841010000	7465900000	2342400000	2411600000	3697200000	7239400000	554150000	2423300000	5153400000	881130000	4252100000	1327300000	977140000	3644000000	3177200000	3599000000	3212100000	1876600000	10051000000	5152500000	13199000000	4503800000	2182400000
P17066	1	Heat shock 70 kDa protein 6	HSPA6	sp|P17066|HSP76_HUMAN Heat shock 70 kDa protein 6 OS=Homo sapiens OX=9606 GN=HSPA6 PE=1 SV=2	4257100000	302250000	1862300000	235620000	104520000	8489800000	1043100000	3899500000	1537500000	422780000	3776500000	2053800000	75268000	109800000	474710000	1216900000	306480000	1286400000	247120000	859230000	1230700000	415310000	1569100000	1810200000	5935900000	147680000	12485000000	23680000000	930240000	9571000000	10669000000	117890000	484380000	779180000	103090000	3070300000	1886800000	138580000	8856800000	1526700000	8029800000	9309200000	16280000000	1068300000	1735000000
O95757	1	Heat shock 70 kDa protein 4L	HSPA4L	sp|O95757|HS74L_HUMAN Heat shock 70 kDa protein 4L OS=Homo sapiens OX=9606 GN=HSPA4L PE=1 SV=3	477950000	1115000000	778490000	732400000	332460000	1641700000	148900000	923100000	1087700000	974100000	495870000	312140000	1354200000	188770000	1463900000	2420400000	7699300000	942680000	924320000	921920000	423010000	1605300000	1394000000	4184000000	2076000000	128900000	3911800000	2956700000	1557900000	581710000	260010000	333030000	632080000	479990000	242400000	55382000	228270000	216620000	620640000	668300000	195120000	5941600000	4491900000	1034900000	1890500000
Q58FF6	1	Putative heat shock protein HSP 90-beta 4	HSP90AB4P	sp|Q58FF6|H90B4_HUMAN Putative heat shock protein HSP 90-beta 4 OS=Homo sapiens OX=9606 GN=HSP90AB4P PE=5 SV=1	4415100000	934200000	928260000	776030000	87572000	926140000	13200000	1896800000	1239400000	2331800000	702000000	351660000	3457000000	337880000	1435200000	4321200000	1880300000	128720000	473960000	585940000	12171000000	1341600000	591270000	2583100000	688950000	229730000	199010000	472030000	661890000	1486000000	815670000	246820000	1650400000	492030000	1277300000	518280000	2409000000	281630000	941550000	527630000	634070000	909610000	1931700000	287390000	1212000000
Q58FF8	1	Putative heat shock protein HSP 90-beta 2	HSP90AB2P	sp|Q58FF8|H90B2_HUMAN Putative heat shock protein HSP 90-beta 2 OS=Homo sapiens OX=9606 GN=HSP90AB2P PE=1 SV=2	39037000	251490000	238270000	104920000	145400000	1457100000	0	4339300000	1686800000	254390000	187260000	56627000	259510000	636120000	4173100000	10708000000	2972200000	560840000	1571900000	1279100000	325490000	1892300000	239880000	2501800000	1467500000	39123000	2072000000	3120100000	844700000	44933000	256020000	0	2630900000	617320000	944420000	21983000	571400000	14081000	15299000	214430000	566590000	5436200000	504390000	211170000	652010000
O43301;A0A1B0GTF3	4	Heat shock 70 kDa protein 12A	HSPA12A	sp|O43301|HS12A_HUMAN Heat shock 70 kDa protein 12A OS=Homo sapiens OX=9606 GN=HSPA12A PE=1 SV=2;tr|A0A1B0GTF3|A0A1B0GTF3_HUMAN Isoform of O43301, Heat shock 70 kDa protein 12A OS=Homo sapiens OX=9606 GN=HSPA12A PE=1 SV=1	91741000	309630000	515460000	61629000	314220000	404170000	2946700	614600000	393370000	1401900000	414890000	71247000	434320000	73162000	3443800000	1550300000	77418000	592970000	437930000	449630000	796890000	1211200000	2139100000	2359200000	914840000	810340000	1374800000	2238700000	519000000	250670000	216860000	18446000	2560300000	293800000	168130000	15237000	489600000	15950000	1702700000	400200000	178000000	8472100000	1075500000	739630000	371740000
Q9UJY1;H0YG30	2	Heat shock protein beta-8	HSPB8	sp|Q9UJY1|HSPB8_HUMAN Heat shock protein beta-8 OS=Homo sapiens OX=9606 GN=HSPB8 PE=1 SV=1;tr|H0YG30|H0YG30_HUMAN Isoform of Q9UJY1, Heat shock protein beta-8 (Fragment) OS=Homo sapiens OX=9606 GN=HSPB8 PE=1 SV=1	86205000	41786000	5862700	1555400	6247100	618210000	11405000	0	43129000	46249000	152910000	0	37075000	3815700	56600000	100890000	136230000	69573000	34456000	126530000	90367000	243190000	182930000	36121000000	590640000	66325000	306960000	409380000	45302000	302390000	109950000	1045900	46588000	1192300	263970	3350200	18558000	4576300	63646000	21552000	39183000	439140000	356240000	525290000	63869000
Q58FG1	1	Putative heat shock protein HSP 90-alpha A4	HSP90AA4P	sp|Q58FG1|HS904_HUMAN Putative heat shock protein HSP 90-alpha A4 OS=Homo sapiens OX=9606 GN=HSP90AA4P PE=5 SV=1	1634800000	671430000	477430000	291190000	47354000	902980000	89379000	1649300000	205320000	2479400000	222350000	138760000	2224300000	123370000	1402600000	2776800000	1109800000	316880000	918450000	574940000	694750000	2532800000	203650000	2069200000	983860000	111640000	721640000	838770000	79262000	870560000	90121000	114350000	191600000	129430000	177470000	509620000	261860000	20945000	621820000	1476600000	189350000	1124400000	1473800000	786620000	235540000
Q58FF7	1	Putative heat shock protein HSP 90-beta-3	HSP90AB3P	sp|Q58FF7|H90B3_HUMAN Putative heat shock protein HSP 90-beta-3 OS=Homo sapiens OX=9606 GN=HSP90AB3P PE=5 SV=1	423640000	885840000	316760000	288520000	87475000	610260000	2170400	767260000	421490000	438090000	114120000	366440000	1480100000	184640000	1268400000	2379800000	1736000000	57973000	356510000	133080000	302400000	318650000	381660000	3895200000	270430000	166860000	347660000	335400000	17478000	493060000	485930000	21929000	138490000	159250000	78054000	115090000	121600000	56328000	188230000	148030000	146160000	451250000	2727000000	178670000	388520000
Q58FG0	1	Putative heat shock protein HSP 90-alpha A5	HSP90AA5P	sp|Q58FG0|HS905_HUMAN Putative heat shock protein HSP 90-alpha A5 OS=Homo sapiens OX=9606 GN=HSP90AA5P PE=2 SV=1	0	8752300	1318000000	0	7996300	43043000	0	2018300000	241690000	1516300000	787400000	5004000	3750400000	474650000	6542400	2199000000	14412000	0	9553800	12009000	10205000	1082600000	13906000	17246000	17740000	0	17028000	3133400	8294800	0	0	1000200	1507300000	35037000	562070000	326100000	994350	7062900	0	8987300	2786400	62918000	21495000	0	11123000
Q9NZL4;Q9NZL4-3;Q9NZL4-2;K7EL16	8	Hsp70-binding protein 1	HSPBP1	sp|Q9NZL4|HPBP1_HUMAN Hsp70-binding protein 1 OS=Homo sapiens OX=9606 GN=HSPBP1 PE=1 SV=2;sp|Q9NZL4-3|HPBP1-3_HUMAN Isoform of Q9NZL4, Isoform 3 of Hsp70-binding protein 1 OS=Homo sapiens OX=9606 GN=HSPBP1 PE=1 SV=2;sp|Q9NZL4-2|HPBP1-2_HUMAN Isoform of Q9N	200330000	431790000	280060000	132050000	94344000	677100000	75600000	357580000	330380000	149310000	74789000	33683000	762250000	52705000	245540000	348360000	625250000	174570000	82708000	178900000	182140000	219100000	159270000	508230000	165730000	34436000	168400000	370190000	97457000	437170000	359340000	37606000	412430000	154880000	104170000	93893000	128750000	2684500	175960000	384060000	432380000	135930000	1298100000	982270000	550930000
Q14568	1	Heat shock protein HSP 90-alpha A2	HSP90AA2P	sp|Q14568|HS902_HUMAN Heat shock protein HSP 90-alpha A2 OS=Homo sapiens OX=9606 GN=HSP90AA2P PE=1 SV=2	21196000	19910000	15173000	409810000	0	40744000	0	786980000	433680000	31076000	18563000	14665000	1306100000	3498800	22145000	740260000	33440000	41114000	0	38537000	3641700	91974000	91236000	199320000	16554000	136930000	185850000	42484000	102470000	0	926130	1508600	24434000	17907000	31296000	2450500	209680000	9268300	160510000	5250600	115850000	173130000	782530000	0	205200000
B1AL69;Q7L3B6	2	Hsp90 co-chaperone Cdc37-like 1	CDC37L1	tr|B1AL69|B1AL69_HUMAN Isoform of Q7L3B6, Hsp90 co-chaperone Cdc37-like 1 OS=Homo sapiens OX=9606 GN=CDC37L1 PE=1 SV=1;sp|Q7L3B6|CD37L_HUMAN Hsp90 co-chaperone Cdc37-like 1 OS=Homo sapiens OX=9606 GN=CDC37L1 PE=1 SV=1	32540000	45740000	79147000	53423000	28806000	22436000	11807000	279120000	102340000	376870000	141790000	71484000	217270000	62923000	80705000	41737000	0	9953400	113890000	19809000	37166000	208700000	66716000	172190000	326260000	10630000	70840000	479130000	231230000	25917000	82479000	77622000	163990000	151320000	83468000	198640000	114260000	39338000	49197000	86604000	106110000	104100000	57295000	243990000	158110000
Q5JX83;Q96MM6	2	Heat shock 70 kDa protein 12B	HSPA12B	tr|Q5JX83|Q5JX83_HUMAN Isoform of Q96MM6, Heat shock 70 kDa protein 12B OS=Homo sapiens OX=9606 GN=HSPA12B PE=1 SV=2;sp|Q96MM6|HS12B_HUMAN Heat shock 70 kDa protein 12B OS=Homo sapiens OX=9606 GN=HSPA12B PE=1 SV=2	21434000	17121000	27279000	0	0	70360000	1306600000	18934000	6258300	93749000	9906300	6514100	17597000	62238000	186220000	479220000	1291800	31127000	4420100	111980000	4508800	83244000	45923000	280410000	119520000	0	96087000	118020000	232520000	55146000	13242000	6943700	30187000	29919000	7435100	10805000	911740000	3444400	73744000	2256500	21236000	72872000	74843000	52846000	9983600
P61604;B8ZZL8;B8ZZ54	3	10 kDa heat shock protein, mitochondrial	HSPE1	sp|P61604|CH10_HUMAN 10 kDa heat shock protein, mitochondrial OS=Homo sapiens OX=9606 GN=HSPE1 PE=1 SV=2;tr|B8ZZL8|B8ZZL8_HUMAN Isoform of P61604, 10 kDa heat shock protein, mitochondrial OS=Homo sapiens OX=9606 GN=HSPE1 PE=1 SV=1;tr|B8ZZ54|B8ZZ54_HUMAN Is	0	0	0	0	50819000	117070000	323720000	6933000	542770000	0	0	11259000	50154000	3768600	61114000	21894000	67294000	152000000	314180000	40850000	131350000	90593000	578870000	410900000	251000000	6625000	36527000	362050000	60991000	65151000	4768300	0	0	1829700	0	0	0	0	56062000	10679000	13362000	21651000	140310000	32811000	328520000
Q53FA3;P34931	2	Heat shock 70 kDa protein 1-like	HSPA1L	tr|Q53FA3|Q53FA3_HUMAN Isoform of P34931, HSPA1L (Fragment) OS=Homo sapiens OX=9606 GN=HSPA1L PE=1 SV=1;sp|P34931|HS71L_HUMAN Heat shock 70 kDa protein 1-like OS=Homo sapiens OX=9606 GN=HSPA1L PE=1 SV=2	24974000	563440	16708000	20223000	14046000	2115900	1494600	15657000	137260000	23983000	22243000	9499400	7210100	154240000	31441000	98082000	29458000	2435900	22287000	8224200	289110000	3713500	4720100	86212000	97898000	1881400	33311000	94295000	7477600	48908000	64186000	30006000	49602000	32409000	4500000	35844000	17972000	14390000	138580000	52701000	75195000	283180000	73615000	46176000	14644000
Q96EW2;Q96EW2-3	3	HSPB1-associated protein 1	HSPBAP1	sp|Q96EW2|HBAP1_HUMAN HSPB1-associated protein 1 OS=Homo sapiens OX=9606 GN=HSPBAP1 PE=1 SV=1;sp|Q96EW2-3|HBAP1-3_HUMAN Isoform of Q96EW2, Isoform 3 of HSPB1-associated protein 1 OS=Homo sapiens OX=9606 GN=HSPBAP1 PE=1 SV=1	2278000	46455000	45311000	9450600	5137500	101420000	24562000	4400000	5784100	90845000	32909000	26189000	79583000	14500000	41351000	83984000	8541600	48816000	0	40286000	10007000	113460000	49192000	44948000	173530000	120910000	62338000	47624000	29851000	0	63430000	0	34831000	9601500	12642000	24474000	83007000	7691200	24564000	33798000	142580000	17930000	230880000	10417000	16141000
A0A1X7SC65;K7EP04;O14558	3	Heat shock protein beta-6	HSPB6	tr|A0A1X7SC65|A0A1X7SC65_HUMAN Isoform of O14558, Heat shock protein beta-6 (Fragment) OS=Homo sapiens OX=9606 GN=HSPB6 PE=1 SV=1;tr|K7EP04|K7EP04_HUMAN Isoform of O14558, Heat shock protein beta-6 OS=Homo sapiens OX=9606 GN=HSPB6 PE=1 SV=1;sp|O14558|HSPB6	23599000	102850000	3156600	109570	968380	15927000	0	2650300	0	1995600	3996600	334880	0	0	5661700	82809000	0	15957000	0	2073500	16755000	40030000	163120000	734770000	4571400	23834000	36669000	145570000	18572000	0	17944000	0	15304000	0	1080500	0	0	0	9860800	657690	5939900	1130200	230210000	4474100	9977100
K7EMP8;P14136;A0A1X7SBR3	3	Glial fibrillary acidic protein	GFAP	tr|K7EMP8|K7EMP8_HUMAN Isoform of P14136, Glial fibrillary acidic protein OS=Homo sapiens OX=9606 GN=GFAP PE=1 SV=2;sp|P14136|GFAP_HUMAN Glial fibrillary acidic protein OS=Homo sapiens OX=9606 GN=GFAP PE=1 SV=1;tr|A0A1X7SBR3|A0A1X7SBR3_HUMAN Isoform of P14	593460000000	193240000000	334690000000	67540000000	297590000000	4414100000000	24640000000	403460000000	174750000000	361270000000	387680000000	196000000000	216280000000	212840000000	2038800000000	430680000000	2581800000000	470440000000	101360000000	3015600000000	118250000000	373540000000	923580000000	1124100000000	2241700000000	5168500000000	4427100000000	6008900000000	794120000000	3422300000000	4161700000000	334890000000	3943200000000	498770000000	421910000000	418540000000	1185400000000	18444000000	1506000000000	391310000000	2533600000000	857250000000	2588500000000	5264400000000	2137800000000
P60709	4	Actin, cytoplasmic 1;Actin, cytoplasmic 1, N-terminally processed	ACTB	sp|P60709|ACTB_HUMAN Actin, cytoplasmic 1 OS=Homo sapiens OX=9606 GN=ACTB PE=1 SV=1	297420000000	420100000000	490010000000	270530000000	321670000000	880900000000	302700000000	724050000000	298560000000	560930000000	747330000000	135300000000	1234200000000	206130000000	917160000000	1075100000000	1867500000000	375280000000	235690000000	1112300000000	410690000000	975640000000	754750000000	1475000000000	1047300000000	208490000000	1312600000000	2553600000000	675790000000	848520000000	2096200000000	273700000000	587190000000	552450000000	344170000000	248920000000	965260000000	38977000000	1112700000000	425820000000	1760000000000	620380000000	2218700000000	1168800000000	1086900000000
P68363;P68363-2	4	Tubulin alpha-1B chain	TUBA1B	sp|P68363|TBA1B_HUMAN Tubulin alpha-1B chain OS=Homo sapiens OX=9606 GN=TUBA1B PE=1 SV=1;sp|P68363-2|TBA1B-2_HUMAN Isoform of P68363, Isoform 2 of Tubulin alpha-1B chain OS=Homo sapiens OX=9606 GN=TUBA1B PE=1 SV=1	64798000000	111110000000	548160000000	64957000000	158670000000	128640000000	8861300000	759400000000	36055000000	613400000000	424560000000	142030000000	309670000000	48959000000	993170000000	345390000000	100000000000	11539000000	26883000000	190200000000	163340000000	60448000000	492440000000	318020000000	808170000000	93233000000	914530000000	1775500000000	115810000000	40189000000	605000000000	189960000000	170810000000	97761000000	137620000000	38973000000	558540000000	9414500000	2294400000000	273710000000	1246200000000	741160000000	922160000000	177890000000	305130000000
A0A0D9SGF6	1	Isoform of Q13813, Spectrin alpha chain, non-erythrocytic 1	SPTAN1	tr|A0A0D9SGF6|A0A0D9SGF6_HUMAN Isoform of Q13813, Spectrin alpha chain, non-erythrocytic 1 OS=Homo sapiens OX=9606 GN=SPTAN1 PE=1 SV=1	153350000000	95916000000	103600000000	101690000000	67897000000	568570000000	23654000000	265230000000	167370000000	197380000000	181090000000	81877000000	347080000000	91663000000	360660000000	366010000000	1321000000000	63325000000	29690000000	641180000000	55703000000	523500000000	162560000000	593020000000	412840000000	175380000000	654720000000	618390000000	257600000000	1256400000000	539210000000	166620000000	259260000000	144120000000	113730000000	192340000000	277730000000	257070000000	440290000000	100010000000	453870000000	702310000000	794060000000	1546100000000	222030000000
Q13885	1	Tubulin beta-2A chain	TUBB2A	sp|Q13885|TBB2A_HUMAN Tubulin beta-2A chain OS=Homo sapiens OX=9606 GN=TUBB2A PE=1 SV=1	25977000000	75116000000	282740000000	31405000000	82525000000	59165000000	3311900000	467530000000	15786000000	535050000000	280160000000	63232000000	128880000000	25484000000	885860000000	153410000000	62459000000	6894800000	9582300000	110400000000	75883000000	38997000000	628820000000	133010000000	520190000000	60953000000	652130000000	1548400000000	88841000000	23519000000	424240000000	129010000000	102130000000	47618000000	90742000000	20926000000	311170000000	3118400000	1389400000000	105770000000	850260000000	384810000000	425860000000	108640000000	164450000000
P00367;P00367-3	2	Glutamate dehydrogenase 1, mitochondrial	GLUD1	sp|P00367|DHE3_HUMAN Glutamate dehydrogenase 1, mitochondrial OS=Homo sapiens OX=9606 GN=GLUD1 PE=1 SV=2;sp|P00367-3|DHE3-3_HUMAN Isoform of P00367, Isoform 3 of Glutamate dehydrogenase 1, mitochondrial OS=Homo sapiens OX=9606 GN=GLUD1 PE=1 SV=2	116860000000	93059000000	87858000000	48851000000	49966000000	602760000000	191620000000	123140000000	67586000000	119390000000	101550000000	29515000000	233670000000	35250000000	115050000000	257470000000	331820000000	46551000000	62897000000	246610000000	63008000000	152550000000	83995000000	242070000000	155430000000	112540000000	153510000000	496900000000	111690000000	632280000000	897810000000	140560000000	93337000000	151400000000	85275000000	68857000000	302230000000	18203000000	213610000000	109490000000	690220000000	94864000000	572500000000	609550000000	149760000000
Q01082;Q01082-2;Q01082-3	3	Spectrin beta chain, non-erythrocytic 1	SPTBN1	sp|Q01082|SPTB2_HUMAN Spectrin beta chain, non-erythrocytic 1 OS=Homo sapiens OX=9606 GN=SPTBN1 PE=1 SV=2;sp|Q01082-2|SPTB2-2_HUMAN Isoform of Q01082, Isoform Short of Spectrin beta chain, non-erythrocytic 1 OS=Homo sapiens OX=9606 GN=SPTBN1 PE=1 SV=2;sp|Q	85898000000	46881000000	57330000000	45120000000	41423000000	310410000000	17211000000	149190000000	93172000000	119540000000	103130000000	33422000000	176380000000	42090000000	276730000000	202460000000	593180000000	23698000000	10066000000	387300000000	22617000000	273790000000	97937000000	309470000000	259820000000	111230000000	358830000000	326420000000	119160000000	623080000000	260550000000	105610000000	147980000000	72165000000	65412000000	96728000000	130910000000	106980000000	218390000000	49936000000	190830000000	394210000000	342460000000	737780000000	158610000000
P09104;F5H0C8	5	Gamma-enolase;Enolase	ENO2	sp|P09104|ENOG_HUMAN Gamma-enolase OS=Homo sapiens OX=9606 GN=ENO2 PE=1 SV=3;tr|F5H0C8|F5H0C8_HUMAN Isoform of P09104, Gamma-enolase OS=Homo sapiens OX=9606 GN=ENO2 PE=1 SV=1	70112000000	143640000000	167010000000	76094000000	58930000000	257700000000	120020000000	198920000000	110950000000	115270000000	112660000000	29517000000	285900000000	41870000000	150180000000	122730000000	376200000000	66414000000	151130000000	106200000000	54162000000	108190000000	81369000000	407490000000	251440000000	23659000000	106390000000	164780000000	110020000000	358360000000	371750000000	45583000000	148860000000	94268000000	85397000000	59760000000	100400000000	10904000000	213070000000	191300000000	412030000000	131920000000	619880000000	184860000000	418210000000
A0A1C7CYX9	2	Dihydropyrimidinase-related protein 2	DPYSL2	tr|A0A1C7CYX9|A0A1C7CYX9_HUMAN Isoform of Q16555, Dihydropyrimidinase-related protein 2 OS=Homo sapiens OX=9606 GN=DPYSL2 PE=1 SV=1	71771000000	101500000000	106450000000	99380000000	35377000000	287720000000	136680000000	128050000000	88403000000	85676000000	72408000000	36054000000	410050000000	37282000000	81963000000	204200000000	500000000000	70701000000	88156000000	118170000000	29446000000	168450000000	73852000000	318630000000	222730000000	30653000000	117990000000	194390000000	87922000000	507170000000	272370000000	38877000000	132570000000	158030000000	64108000000	62375000000	111960000000	61688000000	96406000000	138130000000	230220000000	128210000000	399250000000	231360000000	297760000000
P11216	2	Glycogen phosphorylase, brain form	PYGB	sp|P11216|PYGB_HUMAN Glycogen phosphorylase, brain form OS=Homo sapiens OX=9606 GN=PYGB PE=1 SV=5	54776000000	50618000000	44653000000	92608000000	30090000000	266190000000	15340000000	67569000000	47649000000	63677000000	51835000000	28275000000	159450000000	29703000000	52102000000	103970000000	205900000000	27889000000	30255000000	96552000000	47837000000	53814000000	90900000000	148600000000	75671000000	51872000000	134280000000	329860000000	34181000000	454460000000	237670000000	36302000000	53066000000	87364000000	51369000000	63859000000	303260000000	58094000000	120200000000	56269000000	180910000000	179230000000	609580000000	327640000000	76907000000
P05091	2	Aldehyde dehydrogenase, mitochondrial	ALDH2	sp|P05091|ALDH2_HUMAN Aldehyde dehydrogenase, mitochondrial OS=Homo sapiens OX=9606 GN=ALDH2 PE=1 SV=2	35780000000	51954000000	44564000000	32085000000	27023000000	295510000000	105440000000	63073000000	39651000000	47341000000	57879000000	13557000000	135520000000	21905000000	76086000000	109970000000	420890000000	32202000000	33382000000	83393000000	37811000000	89076000000	53968000000	124520000000	84184000000	55896000000	124080000000	290000000000	46545000000	436610000000	440860000000	63590000000	63317000000	66133000000	43661000000	57406000000	179410000000	9175700000	102020000000	59313000000	326490000000	56717000000	327010000000	269480000000	85158000000
P68871;A0A2R8Y7R2;F8W6P5	4	Hemoglobin subunit beta;LVV-hemorphin-7;Spinorphin	HBB	sp|P68871|HBB_HUMAN Hemoglobin subunit beta OS=Homo sapiens OX=9606 GN=HBB PE=1 SV=2;tr|A0A2R8Y7R2|A0A2R8Y7R2_HUMAN Isoform of P68871, Hemoglobin subunit beta OS=Homo sapiens OX=9606 GN=HBB PE=1 SV=1;tr|F8W6P5|F8W6P5_HUMAN Isoform of P68871, Hemoglobin sub	10781000000	62899000000	93415000000	159760000000	16309000000	252900000000	32132000000	149550000000	37430000000	20877000000	91541000000	8774800000	264110000000	6832200000	58147000000	574010000000	345180000000	50577000000	7982100000	86728000000	22622000000	12599000000	70911000000	92432000000	11395000000	24516000000	102740000000	332060000000	5842700000	111310000000	77256000000	10905000000	85828000000	102130000000	12842000000	15842000000	52668000000	2611900000	149160000000	64580000000	104860000000	13987000000	209990000000	111690000000	79287000000
P15924;P15924-3;P15924-2	3	Desmoplakin	DSP	sp|P15924|DESP_HUMAN Desmoplakin OS=Homo sapiens OX=9606 GN=DSP PE=1 SV=3;sp|P15924-3|DESP-3_HUMAN Isoform of P15924, Isoform DSPIa of Desmoplakin OS=Homo sapiens OX=9606 GN=DSP PE=1 SV=3;sp|P15924-2|DESP-2_HUMAN Isoform of P15924, Isoform DPII of Desmopla	744060000000	17535000000	37358000000	118380000000	4164300000	68171000000	10656000000	23641000000	8434500000	13546000000	31955000000	3974100000	113130000000	19680000000	46204000000	39593000000	25412000000	39805000000	30558000000	31730000000	179410000000	57745000000	29102000000	791210000000	191670000000	5073700000	11947000000	263950000000	27927000000	18390000000	13055000000	2063900000	7314900000	2800300000	34791000000	5448700000	15581000000	1568300000	24277000000	50232000000	2543200000	511950000000	476920000000	74657000000	20501000000
P32119;A6NIW5	3	Peroxiredoxin-2	PRDX2	sp|P32119|PRDX2_HUMAN Peroxiredoxin-2 OS=Homo sapiens OX=9606 GN=PRDX2 PE=1 SV=5;tr|A6NIW5|A6NIW5_HUMAN Isoform of P32119, Peroxiredoxin 2, isoform CRA_a OS=Homo sapiens OX=9606 GN=PRDX2 PE=1 SV=2	34702000000	26535000000	25550000000	58243000000	28365000000	194890000000	48595000000	64593000000	25509000000	23734000000	29232000000	11511000000	58615000000	19225000000	67345000000	98331000000	220710000000	65095000000	18271000000	145970000000	44131000000	42977000000	53175000000	207410000000	70108000000	20184000000	68707000000	189510000000	28805000000	120610000000	120840000000	23611000000	47183000000	37534000000	33757000000	43101000000	86247000000	2191700000	94507000000	46305000000	107980000000	77702000000	232670000000	124990000000	177580000000
P49189-3	1	4-trimethylaminobutyraldehyde dehydrogenase	ALDH9A1	sp|P49189-3|AL9A1-3_HUMAN Isoform of P49189, Isoform 3 of 4-trimethylaminobutyraldehyde dehydrogenase OS=Homo sapiens OX=9606 GN=ALDH9A1 PE=1 SV=3	26978000000	25827000000	29734000000	13910000000	16366000000	166160000000	70133000000	30893000000	25388000000	18439000000	35296000000	10961000000	77504000000	14009000000	67080000000	39682000000	179430000000	27077000000	15990000000	65965000000	22584000000	37010000000	39135000000	63272000000	47177000000	42647000000	87660000000	283640000000	25035000000	361010000000	266580000000	35167000000	69645000000	49492000000	25666000000	52156000000	137250000000	4467200000	58783000000	30033000000	197850000000	28349000000	323410000000	196820000000	56124000000
A0A087WVQ6;Q00610-2;Q00610	8	Clathrin heavy chain;Clathrin heavy chain 1	CLTC	tr|A0A087WVQ6|A0A087WVQ6_HUMAN Isoform of Q00610, Clathrin heavy chain OS=Homo sapiens OX=9606 GN=CLTC PE=1 SV=1;sp|Q00610-2|CLH1-2_HUMAN Isoform of Q00610, Isoform 2 of Clathrin heavy chain 1 OS=Homo sapiens OX=9606 GN=CLTC PE=1 SV=5;sp|Q00610|CLH1_HUMAN	46405000000	50553000000	45533000000	48211000000	29165000000	52475000000	1030100000	149870000000	51841000000	70327000000	51763000000	21707000000	82126000000	26159000000	85381000000	109960000000	122630000000	10325000000	10608000000	162510000000	53536000000	122300000000	74509000000	369250000000	86012000000	24851000000	101260000000	157010000000	106530000000	33436000000	63736000000	38936000000	45381000000	23357000000	40747000000	17278000000	70129000000	33300000000	155610000000	58988000000	74639000000	288370000000	249110000000	132730000000	71226000000
P62258;P62258-2	7	14-3-3 protein epsilon	YWHAE	sp|P62258|1433E_HUMAN 14-3-3 protein epsilon OS=Homo sapiens OX=9606 GN=YWHAE PE=1 SV=1;sp|P62258-2|1433E-2_HUMAN Isoform of P62258, Isoform SV of 14-3-3 protein epsilon OS=Homo sapiens OX=9606 GN=YWHAE PE=1 SV=1	52214000000	60855000000	81508000000	32395000000	25121000000	95362000000	16373000000	128960000000	58503000000	93307000000	31037000000	18629000000	71965000000	19813000000	86773000000	216060000000	161620000000	40336000000	39879000000	179140000000	37911000000	63385000000	188130000000	118790000000	207680000000	23271000000	75929000000	113210000000	142970000000	21772000000	79528000000	8253100000	51884000000	27964000000	37394000000	23966000000	27792000000	1617100000	86390000000	64251000000	78412000000	105240000000	125670000000	57726000000	250190000000
Q9UBB6-2	2	Neurochondrin	NCDN	sp|Q9UBB6-2|NCDN-2_HUMAN Isoform of Q9UBB6, Isoform 2 of Neurochondrin OS=Homo sapiens OX=9606 GN=NCDN PE=1 SV=1	41926000000	57238000000	59998000000	100160000000	39749000000	124370000000	657910000	101220000000	55175000000	84914000000	71457000000	39854000000	269110000000	32808000000	78341000000	67268000000	39966000000	17252000000	26571000000	85773000000	46781000000	62486000000	72883000000	141530000000	76847000000	7435000000	205410000000	155060000000	24298000000	6392200000	20277000000	4882900000	11634000000	95319000000	46794000000	26978000000	22630000000	66610000000	61275000000	54630000000	42082000000	257230000000	250230000000	89832000000	65038000000
Q13509	7	Tubulin beta-3 chain	TUBB3	sp|Q13509|TBB3_HUMAN Tubulin beta-3 chain OS=Homo sapiens OX=9606 GN=TUBB3 PE=1 SV=2	4665000000	33460000000	82146000000	8622600000	20489000000	16825000000	1683900000	142140000000	8215600000	133700000000	93152000000	27669000000	71784000000	6355500000	209050000000	25260000000	11161000000	724150000	829400000	34568000000	9867100000	5597100000	115660000000	49060000000	122610000000	9540400000	135830000000	255400000000	31805000000	6317100000	190440000000	52785000000	19464000000	17355000000	17855000000	3946000000	125520000000	1401900000	490690000000	42087000000	310770000000	103260000000	103300000000	33762000000	50106000000
Q12931;Q12931-2;I3L0K7	7	Heat shock protein 75 kDa, mitochondrial	TRAP1	sp|Q12931|TRAP1_HUMAN Heat shock protein 75 kDa, mitochondrial OS=Homo sapiens OX=9606 GN=TRAP1 PE=1 SV=3;sp|Q12931-2|TRAP1-2_HUMAN Isoform of Q12931, Isoform 2 of Heat shock protein 75 kDa, mitochondrial OS=Homo sapiens OX=9606 GN=TRAP1 PE=1 SV=3;tr|I3L0K	51811000000	77253000000	55987000000	36547000000	42798000000	102570000000	11612000000	88844000000	58193000000	117800000000	62332000000	36633000000	130930000000	32364000000	99064000000	115160000000	144660000000	24687000000	71384000000	47912000000	37429000000	86400000000	75056000000	141210000000	98380000000	50383000000	76789000000	164670000000	54614000000	32160000000	44222000000	9607300000	69624000000	66861000000	50465000000	20619000000	40098000000	36386000000	49107000000	52368000000	39226000000	125040000000	178700000000	66027000000	103610000000
P55072	3	Transitional endoplasmic reticulum ATPase	VCP	sp|P55072|TERA_HUMAN Transitional endoplasmic reticulum ATPase OS=Homo sapiens OX=9606 GN=VCP PE=1 SV=4	6436000000	26499000000	29502000000	18964000000	16914000000	17307000000	31483000000	40066000000	20980000000	52353000000	38969000000	23233000000	109620000000	12578000000	42624000000	106970000000	115890000000	3217800000	2666100000	48955000000	19755000000	52639000000	43797000000	89743000000	79541000000	36652000000	117850000000	359500000000	20074000000	219530000000	232540000000	33438000000	29888000000	44815000000	16985000000	4301000000	270610000000	8919800000	110070000000	25706000000	145980000000	104850000000	287720000000	164850000000	35293000000
P08670;B0YJC4;B0YJC5	5	Vimentin	VIM	sp|P08670|VIME_HUMAN Vimentin OS=Homo sapiens OX=9606 GN=VIM PE=1 SV=4;tr|B0YJC4|B0YJC4_HUMAN Isoform of P08670, Vimentin OS=Homo sapiens OX=9606 GN=VIM PE=1 SV=1;tr|B0YJC5|B0YJC5_HUMAN Isoform of P08670, Vimentin OS=Homo sapiens OX=9606 GN=VIM PE=1 SV=1	8166700000	12996000000	47811000000	2686700000	8699400000	20666000000	611100000	29833000000	6307700000	14782000000	31304000000	11381000000	20391000000	7361500000	381010000000	64158000000	4823100000	18555000000	1698100000	81662000000	3124800000	44756000000	39756000000	121390000000	138980000000	80536000000	71237000000	106280000000	31918000000	123250000000	193630000000	9264200000	108030000000	35745000000	22883000000	6939100000	100480000000	3629400000	103090000000	9378100000	145780000000	39803000000	60532000000	124730000000	65941000000
Q08209;Q08209-5;Q08209-4	5	Serine/threonine-protein phosphatase 2B catalytic subunit alpha isoform	PPP3CA	sp|Q08209|PP2BA_HUMAN Serine/threonine-protein phosphatase 2B catalytic subunit alpha isoform OS=Homo sapiens OX=9606 GN=PPP3CA PE=1 SV=1;sp|Q08209-5|PP2BA-5_HUMAN Isoform of Q08209, Isoform 5 of Serine/threonine-protein phosphatase 2B catalytic subunit al	9573200000	35144000000	36529000000	30796000000	22083000000	35371000000	41040000000	52973000000	31102000000	57111000000	53969000000	17679000000	136760000000	13806000000	79216000000	79151000000	151360000000	20122000000	12078000000	53656000000	14269000000	78918000000	72521000000	91058000000	82166000000	9670800000	141390000000	202020000000	34017000000	208980000000	203940000000	38672000000	6050600000	51464000000	21581000000	16570000000	99064000000	21829000000	85931000000	34209000000	181400000000	51358000000	167960000000	101210000000	74109000000
P02794;G3V192;G3V1D1	9	Ferritin heavy chain;Ferritin heavy chain, N-terminally processed;Ferritin	FTH1	sp|P02794|FRIH_HUMAN Ferritin heavy chain OS=Homo sapiens OX=9606 GN=FTH1 PE=1 SV=2;tr|G3V192|G3V192_HUMAN Isoform of P02794, Ferritin OS=Homo sapiens OX=9606 GN=FTH1 PE=1 SV=1;tr|G3V1D1|G3V1D1_HUMAN Isoform of P02794, Ferritin OS=Homo sapiens OX=9606 GN=F	22719000000	13274000000	13874000000	29286000000	19386000000	294870000000	20904000000	26265000000	14599000000	18693000000	32694000000	8785800000	45100000000	13317000000	34688000000	59225000000	81100000000	97734000000	21361000000	75136000000	7476700000	26757000000	27292000000	65418000000	37376000000	15733000000	47589000000	102130000000	28810000000	223450000000	87567000000	43462000000	14740000000	30735000000	27078000000	29922000000	45170000000	45788000000	39286000000	18989000000	113120000000	88963000000	371940000000	168830000000	53573000000
A0A2R8YDT1	1	Glutamine synthetase	GLUL	tr|A0A2R8YDT1|A0A2R8YDT1_HUMAN Isoform of P15104, Glutamine synthetase OS=Homo sapiens OX=9606 GN=GLUL PE=1 SV=1	10371000000	61865000000	20154000000	34584000000	16013000000	65428000000	21860000000	66883000000	42364000000	35499000000	40547000000	10211000000	144140000000	9376400000	67192000000	89897000000	111010000000	7458700000	18618000000	42588000000	11238000000	48395000000	52849000000	90532000000	63695000000	9542000000	38949000000	53579000000	34368000000	86854000000	242660000000	38409000000	16233000000	43193000000	28654000000	14713000000	89616000000	4194100000	182550000000	35487000000	200920000000	51419000000	247100000000	55686000000	98348000000
P22314-2	1	Ubiquitin-like modifier-activating enzyme 1	UBA1	sp|P22314-2|UBA1-2_HUMAN Isoform of P22314, Isoform 2 of Ubiquitin-like modifier-activating enzyme 1 OS=Homo sapiens OX=9606 GN=UBA1 PE=1 SV=3	81053000000	56405000000	57603000000	46657000000	26860000000	86131000000	650220000	58755000000	71093000000	90313000000	46819000000	47267000000	86872000000	27229000000	84299000000	132940000000	71248000000	24915000000	37256000000	141040000000	27219000000	107800000000	84085000000	242760000000	92928000000	25561000000	46498000000	74858000000	55607000000	23596000000	34325000000	2938000000	83855000000	50286000000	51556000000	26174000000	31366000000	18369000000	35272000000	43697000000	21966000000	178430000000	126440000000	76390000000	78633000000
Q86VP6	4	Cullin-associated NEDD8-dissociated protein 1	CAND1	sp|Q86VP6|CAND1_HUMAN Cullin-associated NEDD8-dissociated protein 1 OS=Homo sapiens OX=9606 GN=CAND1 PE=1 SV=2	32079000000	36256000000	27391000000	40382000000	14725000000	128340000000	2174500000	64679000000	39716000000	30847000000	30617000000	19711000000	112530000000	16780000000	42665000000	60117000000	170010000000	10246000000	10271000000	105730000000	17782000000	43074000000	43514000000	69794000000	41265000000	46944000000	100030000000	146190000000	18517000000	114270000000	97156000000	24136000000	46506000000	37249000000	16604000000	22846000000	52970000000	52509000000	66359000000	27496000000	63589000000	110300000000	298260000000	176000000000	36571000000
P63104;B0AZS6;P63104-2	5	14-3-3 protein zeta/delta	YWHAZ	sp|P63104|1433Z_HUMAN 14-3-3 protein zeta/delta OS=Homo sapiens OX=9606 GN=YWHAZ PE=1 SV=1;tr|B0AZS6|B0AZS6_HUMAN Isoform of P63104, 14-3-3 protein zeta/delta OS=Homo sapiens OX=9606 GN=YWHAZ PE=1 SV=1;sp|P63104-2|1433Z-2_HUMAN Isoform of P63104, Isoform 2	44812000000	40814000000	43340000000	26764000000	13678000000	46927000000	7191700000	106770000000	37457000000	71752000000	29999000000	13230000000	72777000000	15255000000	56498000000	117420000000	74345000000	52128000000	28539000000	111740000000	28878000000	68552000000	93680000000	108740000000	146980000000	9066500000	117230000000	109400000000	94468000000	10268000000	54267000000	5177400000	32733000000	20498000000	36203000000	10734000000	13194000000	1110100000	39159000000	35970000000	37695000000	73756000000	113220000000	33982000000	195010000000
Q15149-3	1	Plectin	PLEC	sp|Q15149-3|PLEC-3_HUMAN Isoform of Q15149, Isoform 3 of Plectin OS=Homo sapiens OX=9606 GN=PLEC PE=1 SV=3	77967000000	17368000000	42846000000	14365000000	10059000000	130930000000	1182200000	40836000000	25455000000	28899000000	12608000000	14207000000	24492000000	17460000000	170940000000	72651000000	90116000000	47193000000	26852000000	156390000000	38941000000	46334000000	34215000000	147980000000	172790000000	46010000000	108500000000	73413000000	48832000000	55336000000	41789000000	4573900000	115390000000	29818000000	32687000000	33123000000	13021000000	19146000000	34318000000	29286000000	28295000000	130810000000	113040000000	107050000000	105660000000
Q06830;A0A0A0MSI0	2	Peroxiredoxin-1	PRDX1	sp|Q06830|PRDX1_HUMAN Peroxiredoxin-1 OS=Homo sapiens OX=9606 GN=PRDX1 PE=1 SV=1;tr|A0A0A0MSI0|A0A0A0MSI0_HUMAN Isoform of Q06830, Peroxiredoxin-1 (Fragment) OS=Homo sapiens OX=9606 GN=PRDX1 PE=1 SV=1	23517000000	19452000000	11789000000	23783000000	15348000000	132740000000	17653000000	27204000000	11355000000	11648000000	27814000000	7113300000	22934000000	8987900000	27142000000	69894000000	79322000000	40889000000	13725000000	84782000000	25130000000	24608000000	30369000000	87305000000	48166000000	21376000000	84566000000	131800000000	14852000000	152520000000	68880000000	10041000000	27306000000	36576000000	15663000000	20147000000	37514000000	1515400000	47900000000	15590000000	64933000000	77162000000	173360000000	220480000000	44708000000
P38606	2	V-type proton ATPase catalytic subunit A	ATP6V1A	sp|P38606|VATA_HUMAN V-type proton ATPase catalytic subunit A OS=Homo sapiens OX=9606 GN=ATP6V1A PE=1 SV=2	26989000000	21838000000	26755000000	36429000000	15425000000	77742000000	12829000000	52895000000	23545000000	31744000000	21214000000	11484000000	110900000000	12752000000	26466000000	65972000000	105200000000	10656000000	20890000000	41955000000	12748000000	36978000000	35864000000	79920000000	43820000000	9122500000	58728000000	221900000000	16152000000	149960000000	99941000000	18125000000	23839000000	31929000000	26300000000	25427000000	88303000000	41884000000	61366000000	30132000000	108060000000	71578000000	150040000000	108670000000	29477000000
P11217;P11217-2	2	Glycogen phosphorylase, muscle form	PYGM	sp|P11217|PYGM_HUMAN Glycogen phosphorylase, muscle form OS=Homo sapiens OX=9606 GN=PYGM PE=1 SV=6;sp|P11217-2|PYGM-2_HUMAN Isoform of P11217, Isoform 2 of Glycogen phosphorylase, muscle form OS=Homo sapiens OX=9606 GN=PYGM PE=1 SV=6	17664000000	27832000000	11126000000	24037000000	27549000000	63924000000	2063000000	47616000000	14960000000	24126000000	15319000000	8817500000	83327000000	6483700000	22263000000	49484000000	151880000000	3311400000	7258000000	35066000000	25907000000	11744000000	24601000000	38772000000	107200000000	60518000000	71829000000	149650000000	11666000000	120980000000	121750000000	24242000000	22619000000	22130000000	6143200000	12459000000	67558000000	8862200000	35485000000	12408000000	38529000000	43798000000	155290000000	71160000000	106400000000
P04406-2	1	Glyceraldehyde-3-phosphate dehydrogenase	GAPDH	sp|P04406-2|G3P-2_HUMAN Isoform of P04406, Isoform 2 of Glyceraldehyde-3-phosphate dehydrogenase OS=Homo sapiens OX=9606 GN=GAPDH PE=1 SV=3	72648000000	39809000000	30890000000	66048000000	19613000000	67564000000	30422000000	64780000000	52533000000	45056000000	45742000000	11140000000	122670000000	9745700000	56523000000	65990000000	320410000000	33004000000	32040000000	68433000000	30949000000	28279000000	26220000000	111840000000	55274000000	18947000000	45266000000	151270000000	21092000000	19592000000	19130000000	4498200000	104730000000	66384000000	49180000000	11670000000	18257000000	1030400000	28324000000	60899000000	39133000000	53343000000	175230000000	43580000000	132840000000
P21281	5	V-type proton ATPase subunit B, brain isoform	ATP6V1B2	sp|P21281|VATB2_HUMAN V-type proton ATPase subunit B, brain isoform OS=Homo sapiens OX=9606 GN=ATP6V1B2 PE=1 SV=3	25081000000	24423000000	38552000000	26458000000	16097000000	72056000000	24318000000	46164000000	26490000000	36200000000	32743000000	9183400000	85423000000	10500000000	47054000000	53278000000	112650000000	14308000000	24029000000	52470000000	16679000000	45094000000	35976000000	75413000000	55567000000	8939000000	53453000000	194120000000	24345000000	93436000000	113940000000	21443000000	32129000000	31101000000	30605000000	28559000000	54885000000	6774800000	65893000000	41764000000	134640000000	26850000000	138080000000	66562000000	51667000000
P12814-3	1	Alpha-actinin-1	ACTN1	sp|P12814-3|ACTN1-3_HUMAN Isoform of P12814, Isoform 3 of Alpha-actinin-1 OS=Homo sapiens OX=9606 GN=ACTN1 PE=1 SV=2	8487800000	14523000000	11475000000	9814200000	7562000000	6850700000	4760300000	32410000000	19636000000	13562000000	26525000000	10259000000	68215000000	5443700000	32794000000	35562000000	21548000000	1267900000	913010000	30112000000	4077200000	22828000000	11617000000	63180000000	38387000000	16238000000	42786000000	54176000000	9867200000	210730000000	268140000000	47024000000	20133000000	34201000000	8326500000	6351400000	185070000000	11002000000	69546000000	15984000000	135850000000	88416000000	66980000000	102590000000	13461000000
Q9BY11;F6U236	2	Protein kinase C and casein kinase substrate in neurons protein 1	PACSIN1	sp|Q9BY11|PACN1_HUMAN Protein kinase C and casein kinase substrate in neurons protein 1 OS=Homo sapiens OX=9606 GN=PACSIN1 PE=1 SV=1;tr|F6U236|F6U236_HUMAN Isoform of Q9BY11, Protein kinase C and casein kinase substrate in neurons protein 1 OS=Homo sapiens	8709400000	18602000000	20270000000	17320000000	23331000000	17906000000	18587000000	27932000000	16408000000	44280000000	41729000000	12555000000	76655000000	10844000000	47401000000	52888000000	45651000000	2995400000	5851700000	35386000000	3360200000	36545000000	41474000000	52353000000	74037000000	5559000000	41565000000	93378000000	42171000000	46169000000	110660000000	36877000000	3103000000	26145000000	17138000000	14192000000	106470000000	5097300000	64497000000	22020000000	118980000000	43454000000	102950000000	67594000000	42991000000
P06576;H0YH81	3	ATP synthase subunit beta, mitochondrial;ATP synthase subunit beta	ATP5B	sp|P06576|ATPB_HUMAN ATP synthase subunit beta, mitochondrial OS=Homo sapiens OX=9606 GN=ATP5F1B PE=1 SV=3;tr|H0YH81|H0YH81_HUMAN Isoform of P06576, ATP synthase subunit beta (Fragment) OS=Homo sapiens OX=9606 GN=ATP5F1B PE=1 SV=1	4971100000	9166500000	7095900000	6098100000	4591000000	41478000000	145520000000	11664000000	7748500000	6586100000	16609000000	1307900000	45545000000	2709700000	30469000000	141160000000	352130000000	31881000000	23207000000	23525000000	10720000000	41545000000	10250000000	62401000000	13581000000	16738000000	32145000000	156930000000	12217000000	92193000000	116380000000	24666000000	20987000000	23094000000	6439400000	7947800000	62621000000	1099400000	35285000000	7992300000	91623000000	8219400000	74350000000	65986000000	20282000000
P49419-2	1	Isoform 2 of Alpha-aminoadipic semialdehyde dehydrogenase	ALDH7A1	sp|P49419-2|AL7A1-2_HUMAN Isoform of P49419, Isoform 2 of Alpha-aminoadipic semialdehyde dehydrogenase OS=Homo sapiens OX=9606 GN=ALDH7A1 PE=1 SV=5	24433000000	31377000000	40710000000	16157000000	14840000000	195560000000	1311100000	39254000000	23881000000	31212000000	34996000000	9562400000	58589000000	13196000000	59345000000	43233000000	85696000000	8611600000	15780000000	80179000000	18302000000	31640000000	27145000000	60239000000	45926000000	34785000000	134190000000	171240000000	14039000000	16665000000	34863000000	3407500000	51941000000	28357000000	31984000000	22679000000	8671600000	2128900000	18505000000	36572000000	21864000000	28933000000	160020000000	130810000000	31498000000
P14618;P14618-3;B4DNK4;H3BQ34	10	Pyruvate kinase PKM;Pyruvate kinase	PKM	sp|P14618|KPYM_HUMAN Pyruvate kinase PKM OS=Homo sapiens OX=9606 GN=PKM PE=1 SV=4;sp|P14618-3|KPYM-3_HUMAN Isoform of P14618, Isoform 3 of Pyruvate kinase PKM OS=Homo sapiens OX=9606 GN=PKM PE=1 SV=4;tr|B4DNK4|B4DNK4_HUMAN Isoform of P14618, Pyruvate kinas	39536000000	37212000000	21815000000	27652000000	11013000000	145200000000	3472400000	23352000000	26915000000	11256000000	27672000000	8793300000	54955000000	11165000000	40837000000	46431000000	121160000000	15127000000	15410000000	37503000000	17255000000	27519000000	23537000000	103540000000	47773000000	24221000000	69799000000	29169000000	13130000000	39171000000	11080000000	12016000000	72283000000	38341000000	30400000000	6187500000	26044000000	19160000000	56329000000	42780000000	47719000000	41222000000	130820000000	83433000000	54768000000
A0A286YF22;O43175;A0A286YFA2	10	D-3-phosphoglycerate dehydrogenase	PHGDH	tr|A0A286YF22|A0A286YF22_HUMAN Isoform of O43175, D-3-phosphoglycerate dehydrogenase OS=Homo sapiens OX=9606 GN=PHGDH PE=1 SV=1;sp|O43175|SERA_HUMAN D-3-phosphoglycerate dehydrogenase OS=Homo sapiens OX=9606 GN=PHGDH PE=1 SV=4;tr|A0A286YFA2|A0A286YFA2_HUMA	27295000000	14140000000	32806000000	16821000000	14003000000	36468000000	344910000	36806000000	17303000000	24018000000	13746000000	6781600000	26907000000	11526000000	52089000000	38594000000	48274000000	19939000000	21838000000	70676000000	20320000000	26363000000	40857000000	40022000000	51811000000	34040000000	70405000000	168410000000	16367000000	14802000000	49399000000	8140600000	55360000000	16088000000	31331000000	16012000000	29356000000	2556800000	125080000000	40637000000	60503000000	28097000000	161400000000	36283000000	66385000000
O43865;O43865-2	2	Putative adenosylhomocysteinase 2	AHCYL1	sp|O43865|SAHH2_HUMAN S-adenosylhomocysteine hydrolase-like protein 1 OS=Homo sapiens OX=9606 GN=AHCYL1 PE=1 SV=2;sp|O43865-2|SAHH2-2_HUMAN Isoform of O43865, Isoform 2 of S-adenosylhomocysteine hydrolase-like protein 1 OS=Homo sapiens OX=9606 GN=AHCYL1 PE	10962000000	24458000000	22629000000	20157000000	15209000000	99624000000	12052000000	25205000000	13051000000	20335000000	10458000000	9703800000	30918000000	8571000000	67084000000	32219000000	107810000000	20370000000	4219900000	44216000000	10898000000	18284000000	16982000000	49377000000	88080000000	17232000000	48709000000	153070000000	6426200000	71083000000	91260000000	17064000000	30015000000	30143000000	11488000000	16151000000	37547000000	15534000000	68292000000	13882000000	46484000000	46385000000	113030000000	76328000000	76052000000
O75891;O75891-3;O75891-2	10	Cytosolic 10-formyltetrahydrofolate dehydrogenase	ALDH1L1	sp|O75891|AL1L1_HUMAN Cytosolic 10-formyltetrahydrofolate dehydrogenase OS=Homo sapiens OX=9606 GN=ALDH1L1 PE=1 SV=2;sp|O75891-3|AL1L1-3_HUMAN Isoform of O75891, Isoform 3 of Cytosolic 10-formyltetrahydrofolate dehydrogenase OS=Homo sapiens OX=9606 GN=ALDH	7986800000	30672000000	19137000000	36946000000	13366000000	66475000000	13740000000	39763000000	28792000000	23180000000	29310000000	9488400000	46197000000	11008000000	30962000000	43618000000	84641000000	7970600000	10551000000	42696000000	13335000000	34158000000	27342000000	92688000000	47749000000	12383000000	46980000000	72289000000	17086000000	54883000000	41155000000	3115600000	24418000000	39507000000	14346000000	9491400000	39396000000	17819000000	50861000000	22529000000	31302000000	103020000000	185230000000	118100000000	19800000000
P53396	3	ATP-citrate synthase	ACLY	sp|P53396|ACLY_HUMAN ATP-citrate synthase OS=Homo sapiens OX=9606 GN=ACLY PE=1 SV=3	37101000000	23081000000	29711000000	47950000000	9270500000	38378000000	558160000	49070000000	13053000000	17895000000	11984000000	4039100000	12720000000	14090000000	38593000000	37698000000	36573000000	18832000000	7113000000	40649000000	59664000000	40266000000	30606000000	225790000000	228770000000	4792300000	27373000000	65099000000	10380000000	5005000000	11361000000	2742100000	31343000000	14835000000	11720000000	11769000000	17834000000	16320000000	42862000000	29807000000	14854000000	299130000000	58036000000	18488000000	17912000000
P06396;A0A0A0MS51;A0A0A0MT01;P06396-4	5	Gelsolin	GSN	sp|P06396|GELS_HUMAN Gelsolin OS=Homo sapiens OX=9606 GN=GSN PE=1 SV=1;tr|A0A0A0MS51|A0A0A0MS51_HUMAN Isoform of P06396, Gelsolin OS=Homo sapiens OX=9606 GN=GSN PE=1 SV=1;tr|A0A0A0MT01|A0A0A0MT01_HUMAN Isoform of P06396, Gelsolin OS=Homo sapiens OX=9606 GN	28943000000	16768000000	25256000000	23907000000	10822000000	66966000000	6266300000	27217000000	12905000000	18833000000	15152000000	8712200000	37366000000	12438000000	20427000000	34568000000	47128000000	18356000000	24194000000	48637000000	23648000000	26917000000	26520000000	75176000000	36204000000	24966000000	59060000000	121350000000	12107000000	41256000000	41581000000	6527300000	62932000000	29927000000	23580000000	17429000000	49263000000	15983000000	28687000000	35945000000	55977000000	48992000000	113610000000	69745000000	36586000000
Q16531;F5GY55	4	DNA damage-binding protein 1	DDB1	sp|Q16531|DDB1_HUMAN DNA damage-binding protein 1 OS=Homo sapiens OX=9606 GN=DDB1 PE=1 SV=1;tr|F5GY55|F5GY55_HUMAN Isoform of Q16531, DNA damage-binding protein 1 OS=Homo sapiens OX=9606 GN=DDB1 PE=1 SV=1	9544400000	11121000000	9622400000	14335000000	5440900000	37141000000	11876000000	26141000000	13840000000	16497000000	18988000000	12246000000	43051000000	7326100000	22201000000	28665000000	84538000000	5749200000	3132200000	41382000000	6607700000	18492000000	19834000000	36153000000	24541000000	8326100000	30429000000	63680000000	11775000000	182540000000	87401000000	24475000000	12884000000	13633000000	7698700000	19100000000	80265000000	24624000000	60499000000	8490700000	75995000000	48625000000	127660000000	111860000000	19638000000
P28482;P28482-2	2	Mitogen-activated protein kinase 1	MAPK1	sp|P28482|MK01_HUMAN Mitogen-activated protein kinase 1 OS=Homo sapiens OX=9606 GN=MAPK1 PE=1 SV=3;sp|P28482-2|MK01-2_HUMAN Isoform of P28482, Isoform 2 of Mitogen-activated protein kinase 1 OS=Homo sapiens OX=9606 GN=MAPK1 PE=1 SV=3	12530000000	12453000000	15001000000	7740700000	8822900000	40876000000	12156000000	16165000000	10224000000	26732000000	18219000000	9517400000	34473000000	5505000000	33709000000	27472000000	90114000000	4919200000	6370200000	33750000000	8506600000	19791000000	19982000000	35714000000	35967000000	19925000000	48246000000	104910000000	11657000000	47135000000	101130000000	13247000000	21106000000	20631000000	13297000000	16300000000	54948000000	938040000	45590000000	14927000000	99086000000	17680000000	100550000000	65095000000	26692000000
P30153;B3KQV6	3	Serine/threonine-protein phosphatase 2A 65 kDa regulatory subunit A alpha isoform	PPP2R1A	sp|P30153|2AAA_HUMAN Serine/threonine-protein phosphatase 2A 65 kDa regulatory subunit A alpha isoform OS=Homo sapiens OX=9606 GN=PPP2R1A PE=1 SV=4;tr|B3KQV6|B3KQV6_HUMAN Isoform of P30153, Serine/threonine-protein phosphatase 2A 65 kDa regulatory subunit	21465000000	35569000000	35239000000	10746000000	13136000000	29298000000	5518900000	38757000000	27288000000	64022000000	30922000000	13345000000	133650000000	7924600000	54089000000	42130000000	43310000000	13044000000	16723000000	37752000000	14342000000	36462000000	36831000000	61381000000	49092000000	9871200000	49611000000	54064000000	24440000000	14571000000	43349000000	6921700000	30798000000	15392000000	22738000000	9021200000	29714000000	6398100000	55899000000	23268000000	38017000000	35132000000	69040000000	28678000000	44842000000
C9JIF9;P13798;H7C1U0;H7C393	7	Acylamino-acid-releasing enzyme	APEH	tr|C9JIF9|C9JIF9_HUMAN Isoform of P13798, Acylamino-acid-releasing enzyme OS=Homo sapiens OX=9606 GN=APEH PE=1 SV=1;sp|P13798|ACPH_HUMAN Acylamino-acid-releasing enzyme OS=Homo sapiens OX=9606 GN=APEH PE=1 SV=4;tr|H7C1U0|H7C1U0_HUMAN Isoform of P13798, Acy	10189000000	12838000000	10475000000	16979000000	7531400000	45274000000	11782000000	18565000000	10579000000	13525000000	13241000000	5924300000	64110000000	6399700000	12693000000	34432000000	26913000000	7686100000	7269000000	20684000000	7821800000	13426000000	14642000000	30759000000	19615000000	7633300000	43377000000	87544000000	8034200000	154350000000	96416000000	19933000000	15710000000	17595000000	11566000000	18060000000	72871000000	39512000000	45907000000	10386000000	72663000000	34590000000	119370000000	87123000000	14812000000
P09972;A8MVZ9;J3KSV6;J3QKP5;C9J8F3	7	Fructose-bisphosphate aldolase C;Fructose-bisphosphate aldolase	ALDOC	sp|P09972|ALDOC_HUMAN Fructose-bisphosphate aldolase C OS=Homo sapiens OX=9606 GN=ALDOC PE=1 SV=2;tr|A8MVZ9|A8MVZ9_HUMAN Isoform of P09972, Fructose-bisphosphate aldolase OS=Homo sapiens OX=9606 GN=ALDOC PE=1 SV=1;tr|J3KSV6|J3KSV6_HUMAN Isoform of P09972,	23367000000	15186000000	21953000000	4456200000	619440000	204420000000	11311000000	33725000000	18052000000	1664700000	33591000000	22049000000	20856000000	857820000	1886200000	5976100000	300850000000	41961000000	9125000000	11739000000	1183000000	33113000000	6999100000	9123800000	32491000000	335080000	12595000000	275160000000	17884000000	3535800000	25259000000	29634000000	14246000000	7988600000	3194100000	451840000	948540000	106600000	3949900000	26583000000	3169400000	56209000000	22395000000	501860000	29040000000
P0C0L4;P0C0L4-2	2	Complement C4-A;Complement C4 beta chain;Complement C4-A alpha chain;C4a anaphylatoxin;C4b-A;C4d-A;Complement C4 gamma chain	C4A	sp|P0C0L4|CO4A_HUMAN Complement C4-A OS=Homo sapiens OX=9606 GN=C4A PE=1 SV=2;sp|P0C0L4-2|CO4A-2_HUMAN Isoform of P0C0L4, Isoform 2 of Complement C4-A OS=Homo sapiens OX=9606 GN=C4A PE=1 SV=2	4267700000	5679000000	10057000000	2834000000	3732800000	21743000000	618980000	2074000000	1659300000	2038900000	3933100000	2903600000	2028600000	4481000000	8443900000	26505000000	17754000000	8877300000	2526200000	173570000000	2280400000	7923300000	3197200000	23373000000	16687000000	48408000000	18802000000	25658000000	2208800000	56412000000	77456000000	7659700000	30255000000	19383000000	4767600000	13660000000	44488000000	12417000000	10706000000	16337000000	26942000000	97633000000	92409000000	59024000000	23293000000
Q99962	1	Endophilin-A1	SH3GL2	sp|Q99962|SH3G2_HUMAN Endophilin-A1 OS=Homo sapiens OX=9606 GN=SH3GL2 PE=1 SV=1	7936500000	33707000000	21134000000	14625000000	14494000000	21420000000	18694000000	39052000000	19240000000	42383000000	27764000000	9710000000	79448000000	7236900000	31009000000	33341000000	73117000000	3283100000	8492200000	26022000000	4155200000	24717000000	25850000000	42978000000	39957000000	5173300000	28846000000	28288000000	19353000000	14182000000	58717000000	11455000000	7801500000	25341000000	19797000000	13486000000	39425000000	905640000	77776000000	20028000000	70962000000	28503000000	70631000000	37248000000	27408000000
P23526;P23526-2	2	Adenosylhomocysteinase	AHCY	sp|P23526|SAHH_HUMAN Adenosylhomocysteinase OS=Homo sapiens OX=9606 GN=AHCY PE=1 SV=4;sp|P23526-2|SAHH-2_HUMAN Isoform of P23526, Isoform 2 of Adenosylhomocysteinase OS=Homo sapiens OX=9606 GN=AHCY PE=1 SV=4	13049000000	17238000000	13397000000	10948000000	8853900000	39989000000	13987000000	14600000000	11621000000	20706000000	14225000000	4007800000	34258000000	6334000000	26400000000	33067000000	41055000000	19319000000	17893000000	28553000000	8820300000	27695000000	28994000000	41395000000	26587000000	11575000000	32947000000	90455000000	17136000000	73008000000	67544000000	10159000000	27743000000	15941000000	14096000000	12955000000	20046000000	3021400000	15898000000	15709000000	55104000000	18757000000	139860000000	49750000000	37630000000
Q92777	1	Synapsin-2	SYN2	sp|Q92777|SYN2_HUMAN Synapsin-2 OS=Homo sapiens OX=9606 GN=SYN2 PE=2 SV=4	4426100000	20157000000	18258000000	12449000000	11260000000	11013000000	4042700000	18242000000	11460000000	28555000000	22704000000	14923000000	71904000000	7382400000	23526000000	31758000000	32878000000	6716300000	6912100000	30745000000	10969000000	18562000000	20609000000	44128000000	26589000000	4044200000	55775000000	82829000000	15545000000	23895000000	68864000000	11426000000	2444800000	35337000000	12498000000	5454000000	42694000000	3223400000	36468000000	13505000000	45052000000	26001000000	70434000000	65712000000	17608000000
P04424;P04424-2;P04424-3;F8W943	5	Argininosuccinate lyase	ASL	sp|P04424|ARLY_HUMAN Argininosuccinate lyase OS=Homo sapiens OX=9606 GN=ASL PE=1 SV=4;sp|P04424-2|ARLY-2_HUMAN Isoform of P04424, Isoform 2 of Argininosuccinate lyase OS=Homo sapiens OX=9606 GN=ASL PE=1 SV=4;sp|P04424-3|ARLY-3_HUMAN Isoform of P04424, Isof	28258000000	19375000000	38406000000	80495000000	7447800000	4425700000	14882000000	34554000000	8474500000	7650100000	9197500000	10165000000	93522000000	27416000000	20232000000	4330200000	10761000000	1638100000	35902000000	2421400000	90463000000	1723900000	1371300000	200070000000	15820000000	2253900000	2967800000	7200100000	1486900000	31544000000	40129000000	7606200000	15403000000	10730000000	44246000000	13489000000	21636000000	111720000	19719000000	45007000000	14022000000	41664000000	261400000000	7948400000	29813000000
A0A2R8Y4H4;Q6ZRR7;Q6ZRR7-2	5	Leucine-rich repeat-containing protein 9	LRRC9	tr|A0A2R8Y4H4|A0A2R8Y4H4_HUMAN Isoform of Q6ZRR7, Leucine-rich repeat-containing protein 9 OS=Homo sapiens OX=9606 GN=LRRC9 PE=4 SV=1;sp|Q6ZRR7|LRRC9_HUMAN Leucine-rich repeat-containing protein 9 OS=Homo sapiens OX=9606 GN=LRRC9 PE=2 SV=2;sp|Q6ZRR7-2|LRRC	890160000000	563610000	358080000	75956000	249820000	50177000000	95127000	859970000	795120000	112720000	25216000	388040000	329080000	538930000	6204100000	20266000000	4820700000	1017100000	1064000000	38213000000	127820000	2133000000	407250000	26866000000	119990000000	5377300000	9962800000	63466000000	2645200000	22033000000	1443600000	274930000	5264800000	399450000	29596000000	165670000	734960000	7206000000	663600000	1447400000	3260900000	41754000000	61225000000	5310200000	6289700000
P68371	3	Tubulin beta-4B chain	TUBB4B	sp|P68371|TBB4B_HUMAN Tubulin beta-4B chain OS=Homo sapiens OX=9606 GN=TUBB4B PE=1 SV=1	3136100000	5670400000	32565000000	3826000000	7446000000	4036200000	286750000	35778000000	2443700000	45273000000	25010000000	6725300000	16335000000	1762700000	136790000000	21377000000	7727500000	1194000000	827430000	8858500000	8296300000	4318800000	57142000000	11078000000	42806000000	6026600000	62777000000	179590000000	9325200000	2398800000	47700000000	14111000000	10167000000	6585600000	9136800000	3017800000	36090000000	699170000	120130000000	17712000000	69271000000	48391000000	38856000000	8585600000	13000000000
P01857;A0A0A0MS08;A0A0A0MS07	3	Ig gamma-1 chain C region	IGHG1	sp|P01857|IGHG1_HUMAN Immunoglobulin heavy constant gamma 1 OS=Homo sapiens OX=9606 GN=IGHG1 PE=1 SV=1;tr|A0A0A0MS08|A0A0A0MS08_HUMAN Isoform of P01857, Immunoglobulin heavy constant gamma 1 (Fragment) OS=Homo sapiens OX=9606 GN=IGHG1 PE=1 SV=1;tr|A0A0A0MS	9105200000	7987300000	10299000000	10048000000	3902100000	43568000000	4965600000	3929000000	4114100000	3267300000	14157000000	5299900000	15342000000	6708900000	17812000000	16962000000	22786000000	20354000000	11743000000	33186000000	5525800000	23737000000	8574500000	120490000000	61474000000	6404600000	9759600000	22809000000	16265000000	21873000000	27863000000	15661000000	53282000000	13460000000	4245900000	6886400000	19818000000	3597800000	36871000000	14904000000	47027000000	19063000000	34993000000	22133000000	49529000000
P00352	4	Retinal dehydrogenase 1	ALDH1A1	sp|P00352|AL1A1_HUMAN Retinal dehydrogenase 1 OS=Homo sapiens OX=9606 GN=ALDH1A1 PE=1 SV=2	21037000000	12414000000	12197000000	8557000000	2570900000	108850000000	110240000000	13984000000	10063000000	6522700000	10842000000	2196500000	24251000000	4894500000	17989000000	15544000000	388590000000	12212000000	7476400000	20503000000	10474000000	6369000000	9395300000	23120000000	10579000000	10531000000	30700000000	65558000000	4211300000	81462000000	76895000000	8853700000	22549000000	9624300000	5793300000	12581000000	13380000000	4820700000	22861000000	8494700000	28874000000	18657000000	69240000000	32461000000	20681000000
P46821	4	Microtubule-associated protein 1B;MAP1B heavy chain;MAP1 light chain LC1	MAP1B	sp|P46821|MAP1B_HUMAN Microtubule-associated protein 1B OS=Homo sapiens OX=9606 GN=MAP1B PE=1 SV=2	40957000000	12168000000	18467000000	15460000000	13255000000	73365000000	1497600000	29828000000	11844000000	39985000000	13292000000	5095300000	36264000000	8987500000	34828000000	18101000000	56818000000	11204000000	13399000000	29161000000	17037000000	15777000000	43110000000	86252000000	50348000000	8287200000	42688000000	105940000000	20383000000	4195300000	22960000000	6027200000	40985000000	10165000000	24125000000	22279000000	5018200000	22286000000	28718000000	19268000000	15142000000	57589000000	60078000000	24394000000	46253000000
Q96KP4;Q96KP4-2;J3QKT2	17	Cytosolic non-specific dipeptidase	CNDP2	sp|Q96KP4|CNDP2_HUMAN Cytosolic non-specific dipeptidase OS=Homo sapiens OX=9606 GN=CNDP2 PE=1 SV=2;sp|Q96KP4-2|CNDP2-2_HUMAN Isoform of Q96KP4, Isoform 2 of Cytosolic non-specific dipeptidase OS=Homo sapiens OX=9606 GN=CNDP2 PE=1 SV=2;tr|J3QKT2|J3QKT2_HUM	18199000000	19170000000	21532000000	13763000000	8705800000	65431000000	1048000000	24416000000	17868000000	14709000000	24492000000	5016600000	47997000000	9051700000	20269000000	27640000000	71523000000	12868000000	17542000000	27206000000	8404600000	14716000000	9214000000	39994000000	26311000000	11065000000	17129000000	56322000000	7303400000	14045000000	40918000000	4909100000	34890000000	15226000000	18581000000	13813000000	27161000000	1835600000	21897000000	21438000000	62143000000	21501000000	92569000000	25562000000	49791000000
P07864;F5H245	2	L-lactate dehydrogenase C chain;L-lactate dehydrogenase	LDHC	sp|P07864|LDHC_HUMAN L-lactate dehydrogenase C chain OS=Homo sapiens OX=9606 GN=LDHC PE=1 SV=4;tr|F5H245|F5H245_HUMAN Isoform of P07864, L-lactate dehydrogenase OS=Homo sapiens OX=9606 GN=LDHC PE=1 SV=1	0	55541000	2848100	27642000000	185540000	2032800000	14752000000	15330000	28158000000	38644000000	687380	113570	15770000	5491900	262670000	420780000	124040000000	95010000	28814000000	137680000000	4601100	17025000	76707000000	131840000000	52952000	7864700	112690000000	212170000000	103750000000	648770000	20750000	423370	134930000	60947000	42119000000	18404000000	352040000	0	27324000000	63560000000	28905000000	149630000	161020000	30330000	163880000
Q9Y2J8;Q9Y2J8-2	2	Protein-arginine deiminase type-2	PADI2	sp|Q9Y2J8|PADI2_HUMAN Protein-arginine deiminase type-2 OS=Homo sapiens OX=9606 GN=PADI2 PE=1 SV=2;sp|Q9Y2J8-2|PADI2-2_HUMAN Isoform of Q9Y2J8, Isoform 2 of Protein-arginine deiminase type-2 OS=Homo sapiens OX=9606 GN=PADI2 PE=1 SV=2	10181000000	4716400000	8384400000	11099000000	4893700000	51651000000	994640000	16090000000	6746800000	11969000000	7952000000	5000500000	24118000000	4289900000	12318000000	22038000000	11401000000	5282000000	4162800000	8232900000	9003100000	6700000000	11250000000	13125000000	16223000000	17076000000	33015000000	135590000000	3796800000	107110000000	66048000000	4489900000	13620000000	12332000000	9457100000	19855000000	44629000000	8817300000	42256000000	17217000000	65600000000	21650000000	163500000000	48269000000	18449000000
P14923	7	Junction plakoglobin	JUP	sp|P14923|PLAK_HUMAN Junction plakoglobin OS=Homo sapiens OX=9606 GN=JUP PE=1 SV=3	171750000000	5622200000	11474000000	36331000000	1662100000	46967000000	3167600000	10475000000	2277800000	4463900000	7656600000	1880800000	35669000000	5731200000	16384000000	17076000000	5379100000	5166400000	10242000000	7604400000	61960000000	13137000000	11767000000	206410000000	47525000000	823630000	5948300000	36088000000	7849900000	4984500000	5887200000	1075100000	3639600000	1280100000	11203000000	1701200000	4924500000	896780000	16473000000	18206000000	1691300000	137830000000	140190000000	22993000000	7589300000
Q14204	8	Cytoplasmic dynein 1 heavy chain 1	DYNC1H1	sp|Q14204|DYHC1_HUMAN Cytoplasmic dynein 1 heavy chain 1 OS=Homo sapiens OX=9606 GN=DYNC1H1 PE=1 SV=5	26830000000	5675200000	21257000000	15550000000	7102200000	11854000000	225290000	40027000000	6457400000	50830000000	19881000000	2944000000	10175000000	5311100000	64022000000	31583000000	10518000000	8040800000	8044800000	42145000000	35366000000	12219000000	46418000000	71390000000	45380000000	24576000000	31501000000	103510000000	13533000000	4550400000	11155000000	2099900000	48471000000	7064600000	11368000000	3574800000	8804100000	3819700000	14511000000	13506000000	3924300000	75972000000	75948000000	16317000000	22668000000
Q71U36-2	7	Isoform 2 of Tubulin alpha-1A chain	TUBA1A	sp|Q71U36-2|TBA1A-2_HUMAN Isoform of Q71U36, Isoform 2 of Tubulin alpha-1A chain OS=Homo sapiens OX=9606 GN=TUBA1A PE=1 SV=1	4017300000	5885700000	34612000000	2004700000	3086000000	4120300000	310610000	39900000000	2365900000	31425000000	18792000000	5432500000	19743000000	1732700000	49549000000	6908600000	1014300000	391980000	841350000	4581000000	10377000000	1180400000	13981000000	10193000000	21303000000	9522800000	34948000000	116500000000	1474500000	4166200000	38539000000	6545300000	19627000000	3086400000	5610300000	2031100000	32378000000	343050000	117320000000	13482000000	57445000000	14471000000	57261000000	45480000000	7891600000
P48454;P48454-2;P48454-3;G3V111	8	Serine/threonine-protein phosphatase 2B catalytic subunit gamma isoform;Serine/threonine-protein phosphatase	PPP3CC	sp|P48454|PP2BC_HUMAN Serine/threonine-protein phosphatase 2B catalytic subunit gamma isoform OS=Homo sapiens OX=9606 GN=PPP3CC PE=1 SV=3;sp|P48454-2|PP2BC-2_HUMAN Isoform of P48454, Isoform 2 of Serine/threonine-protein phosphatase 2B catalytic subunit ga	31242000	108050000	13876000000	1511200000	82361000	10364000000	299640000	30370000000	2069000000	27000000000	27193000000	35595000	12560000000	16847000000	685810000	18544000000	10860000000	0	35931000	186300000	2866500	14757000000	6118800000	24284000000	572130000	7807300000	2597500000	18647000000	3419900000	192280000000	49358000000	143920000	43182000000	188250000	35125000000	121990000	4983000000	39954000	95323000000	18764000000	23217000000	266510000	102760000000	17694000000	1504700000
P04114	2	Apolipoprotein B-100;Apolipoprotein B-48	APOB	sp|P04114|APOB_HUMAN Apolipoprotein B-100 OS=Homo sapiens OX=9606 GN=APOB PE=1 SV=2	9775600000	5035900000	10485000000	6648200000	4883900000	27865000000	663980000	1855800000	6983500000	2745900000	13148000000	3510700000	9043700000	2209400000	25768000000	37584000000	25435000000	3202200000	2554100000	35411000000	6233200000	16201000000	7402900000	30158000000	26266000000	16532000000	10729000000	48134000000	5453000000	32624000000	31601000000	39910000000	36565000000	8969100000	3119400000	19169000000	26370000000	22093000000	36166000000	4329500000	44018000000	30633000000	108220000000	42940000000	18120000000
P21333-2;P21333	6	Filamin-A	FLNA	sp|P21333-2|FLNA-2_HUMAN Isoform of P21333, Isoform 2 of Filamin-A OS=Homo sapiens OX=9606 GN=FLNA PE=1 SV=4;sp|P21333|FLNA_HUMAN Filamin-A OS=Homo sapiens OX=9606 GN=FLNA PE=1 SV=4	8644900000	9592900000	8976900000	7464400000	5773400000	18946000000	75103000	24879000000	7155500000	4591800000	20245000000	1783000000	15515000000	1814200000	90121000000	14114000000	8993000000	6079500000	2584400000	49126000000	7172100000	11868000000	12145000000	64353000000	16508000000	29762000000	20649000000	80077000000	2842200000	28335000000	45066000000	5252100000	48843000000	15496000000	7402300000	7239900000	22522000000	4804300000	22028000000	8067700000	13853000000	27275000000	74794000000	22755000000	10479000000
P01023	4	Alpha-2-macroglobulin	A2M	sp|P01023|A2MG_HUMAN Alpha-2-macroglobulin OS=Homo sapiens OX=9606 GN=A2M PE=1 SV=3	9003200000	9104200000	26255000000	7215000000	3816100000	30756000000	1027500000	11330000000	9728800000	3758100000	11844000000	9785000000	10984000000	4873800000	18942000000	16617000000	44502000000	9301100000	2895400000	47453000000	4150000000	9079200000	5143100000	53860000000	20578000000	7971500000	25288000000	15969000000	5487500000	74643000000	31332000000	15827000000	30886000000	9020800000	6232600000	13724000000	20308000000	16564000000	24072000000	13660000000	33727000000	19432000000	91427000000	41322000000	16663000000
P61764-2;A0A1B0GTP9	3	Syntaxin-binding protein 1	STXBP1	sp|P61764-2|STXB1-2_HUMAN Isoform of P61764, Isoform 2 of Syntaxin-binding protein 1 OS=Homo sapiens OX=9606 GN=STXBP1 PE=1 SV=1;tr|A0A1B0GTP9|A0A1B0GTP9_HUMAN Isoform of P61764, Syntaxin-binding protein 1 OS=Homo sapiens OX=9606 GN=STXBP1 PE=1 SV=1	280640000	22764000000	22369000000	16919000000	16845000000	30369000000	4643300	36452000000	19773000000	66071000000	22643000000	9827200000	29147000000	7357900000	15640000000	51871000000	27844000000	2831900000	14105000000	9135900000	10592000000	31839000000	22585000000	48785000000	23437000000	7053500000	20923000000	52287000000	20415000000	4887400000	1295700000	1938300000	15209000000	24819000000	13134000000	4497500000	15667000000	17131000000	74671000000	18639000000	13975000000	54554000000	50740000000	10195000000	29679000000
P35573	2	Glycogen debranching enzyme;4-alpha-glucanotransferase;Amylo-alpha-1,6-glucosidase	AGL	sp|P35573|GDE_HUMAN Glycogen debranching enzyme OS=Homo sapiens OX=9606 GN=AGL PE=1 SV=3	5205000000	9582800000	6508400000	11999000000	3879700000	20329000000	815990000	22753000000	15865000000	12394000000	10790000000	7056300000	15957000000	3621700000	17466000000	9522800000	14849000000	1989000000	1427700000	12072000000	7293000000	10441000000	9496300000	31393000000	11801000000	5139500000	15156000000	25898000000	6426600000	108300000000	44099000000	16632000000	8395000000	8251100000	4150400000	13747000000	65392000000	8753600000	16685000000	9066400000	47920000000	32551000000	90555000000	38974000000	8673600000
P49418;P49418-2	2	Amphiphysin	AMPH	sp|P49418|AMPH_HUMAN Amphiphysin OS=Homo sapiens OX=9606 GN=AMPH PE=1 SV=1;sp|P49418-2|AMPH-2_HUMAN Isoform of P49418, Isoform 2 of Amphiphysin OS=Homo sapiens OX=9606 GN=AMPH PE=1 SV=1	8703800000	13749000000	15564000000	13374000000	11789000000	4522900000	376010000	25631000000	13701000000	37476000000	17258000000	12717000000	32675000000	5656100000	24442000000	42553000000	4241800000	2636100000	11636000000	29564000000	6529000000	9148300000	37529000000	47199000000	35246000000	1241600000	28052000000	48507000000	32198000000	6889800000	16702000000	8190900000	5370400000	8383500000	16344000000	5549400000	35304000000	11156000000	52053000000	14747000000	33493000000	47399000000	60390000000	11399000000	20702000000
Q92752	2	Tenascin-R	TNR	sp|Q92752|TENR_HUMAN Tenascin-R OS=Homo sapiens OX=9606 GN=TNR PE=1 SV=3	4953500000	7756500000	6830400000	3475900000	3779300000	26390000000	2158900000	21288000000	11215000000	26518000000	15731000000	6934700000	25929000000	3399600000	22535000000	23046000000	20368000000	1109800000	673500000	31293000000	3241300000	24736000000	12725000000	37961000000	27024000000	7591200000	26123000000	27034000000	9933400000	127950000000	16120000000	7706700000	7737600000	7745800000	6898600000	5546200000	11200000000	5278700000	17450000000	5866700000	10285000000	35665000000	39774000000	157400000000	11015000000
O43776	7	Asparagine--tRNA ligase, cytoplasmic	NARS	sp|O43776|SYNC_HUMAN Asparagine--tRNA ligase, cytoplasmic OS=Homo sapiens OX=9606 GN=NARS PE=1 SV=1	50102000000	11228000000	8046200000	10044000000	4442000000	28475000000	2303500000	23667000000	9420500000	14401000000	16145000000	6158800000	60119000000	4423300000	13242000000	13154000000	20472000000	586610000	1623000000	13341000000	5211400000	8889500000	9378900000	19000000000	12400000000	7004500000	16745000000	68120000000	3680300000	27733000000	48324000000	9587100000	12745000000	19133000000	9413600000	9038900000	48032000000	12629000000	43869000000	8630800000	49398000000	16097000000	79190000000	36156000000	13921000000
Q9Y2T3-3;Q9Y2T3;Q9Y2T3-2	3	Guanine deaminase	GDA	sp|Q9Y2T3-3|GUAD-3_HUMAN Isoform of Q9Y2T3, Isoform 3 of Guanine deaminase OS=Homo sapiens OX=9606 GN=GDA PE=1 SV=1;sp|Q9Y2T3|GUAD_HUMAN Guanine deaminase OS=Homo sapiens OX=9606 GN=GDA PE=1 SV=1;sp|Q9Y2T3-2|GUAD-2_HUMAN Isoform of Q9Y2T3, Isoform 2 of Gua	5136700000	13723000000	18917000000	5960800000	8353100000	15282000000	451160000	18757000000	11586000000	28234000000	16301000000	4751800000	51796000000	4171200000	35103000000	22550000000	475350000	3832200000	7200600000	25555000000	4528800000	19346000000	21013000000	41829000000	42602000000	2094900000	31628000000	26708000000	15839000000	19820000000	36310000000	5992300000	1368500000	11444000000	11851000000	5231000000	17095000000	746620000	33470000000	16707000000	45878000000	19159000000	40798000000	22152000000	30865000000
C9JFZ1;J3KQV8;O43426-2;O43426;O43426-4	6	Synaptojanin-1	SYNJ1	tr|C9JFZ1|C9JFZ1_HUMAN Isoform of O43426, Synaptojanin-1 OS=Homo sapiens OX=9606 GN=SYNJ1 PE=1 SV=1;tr|J3KQV8|J3KQV8_HUMAN Isoform of O43426, Synaptojanin-1 OS=Homo sapiens OX=9606 GN=SYNJ1 PE=1 SV=1;sp|O43426-2|SYNJ1-2_HUMAN Isoform of O43426, Isoform 2 o	6894100000	16896000000	13524000000	13351000000	4665200000	26193000000	54740000	23433000000	19520000000	14371000000	11739000000	8569200000	44378000000	5769400000	15062000000	26168000000	29649000000	4431300000	4072100000	37474000000	3808300000	28910000000	13054000000	40112000000	29638000000	1625100000	37554000000	16392000000	14742000000	2917100000	15605000000	7066200000	7433700000	14887000000	7211800000	9248700000	15916000000	18131000000	34996000000	12138000000	20560000000	36932000000	21722000000	35805000000	18230000000
P61981	1	14-3-3 protein gamma;14-3-3 protein gamma, N-terminally processed	YWHAG	sp|P61981|1433G_HUMAN 14-3-3 protein gamma OS=Homo sapiens OX=9606 GN=YWHAG PE=1 SV=2	14459000000	5977900000	25811000000	5073800000	9259600000	3701600000	492630000	50942000000	7553500000	55112000000	5886700000	4173300000	7701400000	3728200000	47984000000	85363000000	23617000000	24515000000	17055000000	40894000000	4619000000	38778000000	74697000000	21462000000	53192000000	2182200000	36219000000	22807000000	44036000000	1051500000	5178500000	549400000	12364000000	3659300000	18997000000	1572700000	2471700000	222920000	10223000000	19242000000	4233100000	31433000000	15544000000	2097600000	82813000000
O43707;F5GXS2	3	Alpha-actinin-4	ACTN4	sp|O43707|ACTN4_HUMAN Alpha-actinin-4 OS=Homo sapiens OX=9606 GN=ACTN4 PE=1 SV=2;tr|F5GXS2|F5GXS2_HUMAN Isoform of O43707, Alpha-actinin-4 OS=Homo sapiens OX=9606 GN=ACTN4 PE=1 SV=2	18946000000	7819000000	3740600000	8020200000	2858100000	8696200000	6914100000	11388000000	7573300000	4670900000	12513000000	2765600000	26354000000	2292000000	9773200000	13545000000	14778000000	1110400000	936130000	12641000000	16649000000	8247700000	5036900000	25131000000	10388000000	7649700000	8184100000	27678000000	3176900000	115740000000	58356000000	17005000000	14476000000	15411000000	3160700000	4306200000	67286000000	10215000000	21328000000	5386400000	44376000000	25183000000	50111000000	41049000000	6607800000
P49327	1	Fatty acid synthase;[Acyl-carrier-protein] S-acetyltransferase;[Acyl-carrier-protein] S-malonyltransferase;3-oxoacyl-[acyl-carrier-protein] synthase;3-oxoacyl-[acyl-carrier-protein] reductase;3-hydroxyacyl-[acyl-carrier-protein] dehydratase;Enoyl-[acyl-carrier-protein] reductase;Oleoyl-[acyl-carrier-protein] hydrolase	FASN	sp|P49327|FAS_HUMAN Fatty acid synthase OS=Homo sapiens OX=9606 GN=FASN PE=1 SV=3	20826000000	7090600000	15519000000	7957700000	5031000000	17190000000	64526000	34812000000	17288000000	33194000000	9837800000	5382100000	11430000000	4625600000	46629000000	41810000000	34738000000	7741700000	9445800000	54507000000	17154000000	32469000000	30225000000	57745000000	55742000000	7174100000	25480000000	31197000000	17926000000	3323400000	8819900000	1780800000	33477000000	4189300000	21369000000	3605400000	3347000000	11321000000	20477000000	14611000000	4831800000	67338000000	38311000000	8405400000	35569000000
E9PGC8;P78559;P78559-2	3	Microtubule-associated protein 1A;MAP1A heavy chain;MAP1 light chain LC2	MAP1A	tr|E9PGC8|E9PGC8_HUMAN Isoform of P78559, Microtubule-associated protein 1A OS=Homo sapiens OX=9606 GN=MAP1A PE=1 SV=1;sp|P78559|MAP1A_HUMAN Microtubule-associated protein 1A OS=Homo sapiens OX=9606 GN=MAP1A PE=1 SV=6;sp|P78559-2|MAP1A-2_HUMAN Isoform of P	17437000000	6688600000	14969000000	11735000000	9266100000	20769000000	877740000	28494000000	10187000000	54980000000	17551000000	7945400000	18734000000	3609100000	24279000000	7852100000	18351000000	4561700000	7200100000	30064000000	12121000000	7237600000	32447000000	35687000000	26933000000	2923400000	42559000000	70652000000	15313000000	2741700000	13926000000	7894800000	12202000000	3225300000	21567000000	11042000000	10215000000	15435000000	44277000000	15348000000	16503000000	43438000000	34865000000	10101000000	33247000000
P08237-3;A0A2R8Y891;P08237;P08237-2;F8VZI0	20	ATP-dependent 6-phosphofructokinase, muscle type	PFKM	sp|P08237-3|PFKAM-3_HUMAN Isoform of P08237, Isoform 3 of ATP-dependent 6-phosphofructokinase, muscle type OS=Homo sapiens OX=9606 GN=PFKM PE=1 SV=2;tr|A0A2R8Y891|A0A2R8Y891_HUMAN Isoform of P08237, ATP-dependent 6-phosphofructokinase OS=Homo sapiens OX=96	5994900000	5661800000	10147000000	9846700000	4775100000	56682000000	323320000	23054000000	5563500000	20371000000	4907700000	2903100000	21361000000	2216300000	16357000000	20788000000	23243000000	3643000000	3986300000	14332000000	2709500000	8825500000	24329000000	12728000000	14696000000	6432800000	19942000000	104430000000	4267200000	24665000000	37035000000	3916000000	16827000000	12150000000	3627200000	15481000000	52161000000	16291000000	35198000000	9658300000	19273000000	25341000000	47125000000	27694000000	13638000000
P25705;P25705-2;K7EK77	7	ATP synthase subunit alpha, mitochondrial	ATP5A1	sp|P25705|ATPA_HUMAN ATP synthase subunit alpha, mitochondrial OS=Homo sapiens OX=9606 GN=ATP5F1A PE=1 SV=1;sp|P25705-2|ATPA-2_HUMAN Isoform of P25705, Isoform 2 of ATP synthase subunit alpha, mitochondrial OS=Homo sapiens OX=9606 GN=ATP5F1A PE=1 SV=1;tr|K	2337100000	3952300000	4097100000	3650300000	3009300000	9251100000	25977000000	8120300000	4338100000	6173100000	10921000000	1127700000	19659000000	1128200000	29358000000	58683000000	123640000000	6591800000	4410600000	14100000000	5074200000	14145000000	11323000000	27998000000	11885000000	5986200000	21577000000	98453000000	6245900000	17699000000	45824000000	9892300000	11387000000	10276000000	4332800000	3039300000	47621000000	560310000	24479000000	7394500000	38092000000	8351900000	41392000000	18691000000	9449600000
P17600	2	Synapsin-1	SYN1	sp|P17600|SYN1_HUMAN Synapsin-1 OS=Homo sapiens OX=9606 GN=SYN1 PE=1 SV=3	1969800000	16066000000	12387000000	12469000000	5469900000	7542600000	3693400000	13753000000	9746300000	21375000000	14673000000	8044400000	55538000000	3823300000	15255000000	17186000000	31264000000	1391000000	3061600000	13100000000	2903200000	22788000000	9977200000	25376000000	14113000000	1345800000	26938000000	33960000000	6884800000	21031000000	35337000000	6856700000	1792100000	29390000000	8643100000	4293700000	46237000000	10075000000	21382000000	11217000000	27309000000	22014000000	47491000000	28343000000	10206000000
P41250	3	Glycine--tRNA ligase	GARS	sp|P41250|GARS_HUMAN Glycine--tRNA ligase OS=Homo sapiens OX=9606 GN=GARS PE=1 SV=3	6118600000	9861100000	8009400000	13034000000	3961500000	29810000000	8960400000	13785000000	8994100000	5564500000	11095000000	3680700000	48985000000	4582200000	4839900000	13733000000	29139000000	2320400000	4137600000	8747200000	5259500000	7199400000	9551800000	24996000000	12871000000	3288800000	20352000000	47702000000	5778500000	40128000000	57623000000	8603500000	9730700000	11881000000	4049300000	6400500000	33680000000	14285000000	17089000000	8920500000	40401000000	26571000000	71018000000	39002000000	12002000000
P01024	4	Complement C3;Complement C3 beta chain;C3-beta-c;Complement C3 alpha chain;C3a anaphylatoxin;Acylation stimulating protein;Complement C3b alpha chain;Complement C3c alpha chain fragment 1;Complement C3dg fragment;Complement C3g fragment;Complement C3d fragment;Complement C3f fragment;Complement C3c alpha chain fragment 2	C3	sp|P01024|CO3_HUMAN Complement C3 OS=Homo sapiens OX=9606 GN=C3 PE=1 SV=2	6067800000	8414800000	16012000000	9218900000	3944000000	13792000000	3062500000	16343000000	4519400000	3414100000	9005400000	4609000000	19804000000	5268400000	8778200000	23854000000	9365000000	5467800000	6563100000	31009000000	2288100000	4935500000	3534700000	39561000000	21322000000	9957800000	8383100000	26777000000	3714400000	38890000000	26608000000	4737000000	29409000000	18016000000	6475500000	10914000000	16109000000	10741000000	9975200000	16625000000	28570000000	9631300000	58553000000	23727000000	31247000000
P12277	5	Creatine kinase B-type	CKB	sp|P12277|KCRB_HUMAN Creatine kinase B-type OS=Homo sapiens OX=9606 GN=CKB PE=1 SV=1	9297600000	11544000000	45965000000	1799700000	2934700000	1588700000	98287000	18236000000	16236000000	52815000000	3522700000	1388200000	4368400000	1227900000	28654000000	36099000000	6883300000	28535000000	46201000000	6326700000	5472200000	40244000000	23882000000	116230000000	74015000000	8006200000	12861000000	22145000000	46860000000	1356200000	3348000000	224800000	56146000000	4553100000	5614300000	3271200000	856970000	43067000	5105700000	16454000000	1222700000	9500500000	8105700000	2755300000	54337000000
E9PLK3;P55786;P55786-2	9	Puromycin-sensitive aminopeptidase	NPEPPS	tr|E9PLK3|E9PLK3_HUMAN Isoform of P55786, Aminopeptidase OS=Homo sapiens OX=9606 GN=NPEPPS PE=1 SV=1;sp|P55786|PSA_HUMAN Puromycin-sensitive aminopeptidase OS=Homo sapiens OX=9606 GN=NPEPPS PE=1 SV=2;sp|P55786-2|PSA-2_HUMAN Isoform of P55786, Isoform 2 of	8773100000	13323000000	10369000000	19616000000	5797700000	24805000000	1773900000	16792000000	11486000000	6939300000	5298200000	4593800000	24345000000	4722200000	11383000000	17436000000	71079000000	6264600000	5780300000	30641000000	20042000000	10584000000	11571000000	33900000000	27139000000	3532700000	22776000000	32173000000	7918100000	20769000000	13127000000	2940500000	17476000000	16096000000	4753300000	3428500000	12396000000	6518600000	8089700000	19378000000	17645000000	35030000000	70124000000	31475000000	21220000000
P36957;P36957-2;Q86SW4	6	Dihydrolipoyllysine-residue succinyltransferase component of 2-oxoglutarate dehydrogenase complex, mitochondrial	DLST	sp|P36957|ODO2_HUMAN Dihydrolipoyllysine-residue succinyltransferase component of 2-oxoglutarate dehydrogenase complex, mitochondrial OS=Homo sapiens OX=9606 GN=DLST PE=1 SV=4;sp|P36957-2|ODO2-2_HUMAN Isoform of P36957, Isoform 2 of Dihydrolipoyllysine-res	571710000	1277700000	885490000	938570000	767370000	410540000000	2074100000	2913200000	473420000	740260000	1771800000	119910000	3375300000	560460000	4382500000	129780000000	37614000000	1360300000	43315000000	4568600000	1784500000	2164800000	12545000000	34466000000	2302800000	1091500000	10662000000	10676000000	21917000000	1212600000	2536400000	1650900000	211440000	1746600000	1378500000	900150000	2468900000	336250000	4971800000	1487000000	3059800000	2163500000	11414000000	8237200000	3445900000
B1AKY9;P50993;H0Y7C1	3	Sodium/potassium-transporting ATPase subunit alpha-2	ATP1A2	tr|B1AKY9|B1AKY9_HUMAN Isoform of P50993, Sodium/potassium-transporting ATPase subunit alpha OS=Homo sapiens OX=9606 GN=ATP1A2 PE=1 SV=1;sp|P50993|AT1A2_HUMAN Sodium/potassium-transporting ATPase subunit alpha-2 OS=Homo sapiens OX=9606 GN=ATP1A2 PE=1 SV=1;	1855700000	6382300000	3702800000	11188000000	3584000000	21402000000	9316900000	12038000000	3216400000	7727200000	11142000000	2212700000	9383400000	947390000	18302000000	20117000000	11986000000	1319500000	581720000	12199000000	12894000000	12691000000	10920000000	31077000000	5007200000	15564000000	24873000000	157810000000	2931100000	50359000000	38069000000	6228100000	6149200000	14022000000	2674800000	9314200000	52193000000	9500900000	11938000000	4545800000	17925000000	12129000000	43684000000	42598000000	4564900000
A0A2U3TZH3;Q05639	5	Elongation factor 1-alpha 2	EEF1A2	tr|A0A2U3TZH3|A0A2U3TZH3_HUMAN Isoform of Q05639, Elongation factor 1-alpha OS=Homo sapiens OX=9606 GN=EEF1A2 PE=1 SV=1;sp|Q05639|EF1A2_HUMAN Elongation factor 1-alpha 2 OS=Homo sapiens OX=9606 GN=EEF1A2 PE=1 SV=1	16511000000	13288000000	12551000000	6559300000	6492400000	44248000000	979010000	18564000000	10279000000	15653000000	12458000000	3043900000	28714000000	4601600000	27221000000	26128000000	25390000000	5290200000	8117600000	19380000000	13972000000	16456000000	24826000000	72325000000	25488000000	3278300000	24867000000	39365000000	13062000000	1281500000	15454000000	3705400000	10413000000	8664000000	9133800000	2999300000	10825000000	405470000	24891000000	13113000000	14712000000	23397000000	36117000000	12767000000	35633000000
P35611-4	1	Alpha-adducin	ADD1	sp|P35611-4|ADDA-4_HUMAN Isoform of P35611, Isoform 4 of Alpha-adducin OS=Homo sapiens OX=9606 GN=ADD1 PE=1 SV=2	4096000000	8595900000	9484800000	7635900000	4267400000	15558000000	5354900000	16503000000	11706000000	13927000000	12207000000	4527100000	27467000000	3089300000	16078000000	10390000000	26012000000	2280100000	3154600000	19879000000	5377600000	14216000000	11258000000	26580000000	21204000000	8337600000	28652000000	49075000000	9994400000	26284000000	40079000000	5989600000	15932000000	11363000000	9787900000	5172300000	20647000000	3271500000	23591000000	9138400000	31860000000	17731000000	29835000000	27798000000	16707000000
P20336;M0R257	3	Ras-related protein Rab-3A	RAB3A	sp|P20336|RAB3A_HUMAN Ras-related protein Rab-3A OS=Homo sapiens OX=9606 GN=RAB3A PE=1 SV=1;tr|M0R257|M0R257_HUMAN Isoform of P20336, Ras-related protein Rab-3A (Fragment) OS=Homo sapiens OX=9606 GN=RAB3A PE=1 SV=1	27792000000	10458000000	8883400000	11243000000	4733300000	24209000000	4658300000	22768000000	13963000000	9161300000	13587000000	2497000000	32566000000	3320400000	14444000000	27881000000	47202000000	2874200000	2339500000	28930000000	15148000000	11255000000	23042000000	25601000000	17159000000	1562900000	25618000000	54839000000	8691600000	9778700000	23910000000	2668900000	3478900000	11298000000	6878300000	3270600000	14764000000	264830000	23342000000	6904400000	14714000000	36983000000	41461000000	35236000000	33296000000
P31946-2;P31946	2	14-3-3 protein beta/alpha;14-3-3 protein beta/alpha, N-terminally processed	YWHAB	sp|P31946-2|1433B-2_HUMAN Isoform of P31946, Isoform Short of 14-3-3 protein beta/alpha OS=Homo sapiens OX=9606 GN=YWHAB PE=1 SV=3;sp|P31946|1433B_HUMAN 14-3-3 protein beta/alpha OS=Homo sapiens OX=9606 GN=YWHAB PE=1 SV=3	13377000000	7293100000	20018000000	7921100000	3044000000	8858300000	1509900000	27603000000	6952600000	17085000000	9971400000	3799500000	11826000000	1847100000	8774800000	64982000000	23686000000	20767000000	6602000000	50205000000	6543000000	12993000000	49417000000	32620000000	59867000000	1344300000	41021000000	31965000000	12376000000	1591800000	7694700000	1031100000	7732100000	4254600000	7365100000	1331600000	4153600000	155460000	6502200000	10134000000	4980400000	21572000000	27472000000	9997400000	78003000000
P02792	1	Ferritin light chain	FTL	sp|P02792|FRIL_HUMAN Ferritin light chain OS=Homo sapiens OX=9606 GN=FTL PE=1 SV=2	3533400000	2046900000	2460500000	7517200000	847190000	72949000000	2940400000	13395000000	5559900000	3686300000	7693000000	7525600000	17113000000	2186600000	3953300000	10524000000	12648000000	36602000000	2389600000	5508600000	2330900000	3736400000	2818400000	17322000000	8965600000	3486400000	8759600000	23333000000	2862600000	107120000000	41986000000	14075000000	11139000000	4918700000	3222000000	6407300000	18035000000	7679700000	17854000000	4765300000	16358000000	22391000000	59362000000	29106000000	8771400000
O00410-3	2	Importin-5	IPO5	sp|O00410-3|IPO5-3_HUMAN Isoform of O00410, Isoform 3 of Importin-5 OS=Homo sapiens OX=9606 GN=IPO5 PE=1 SV=4	11634000000	9411000000	10538000000	7241000000	2944000000	17354000000	105040000	20542000000	12979000000	17429000000	14147000000	8811900000	31687000000	5346500000	13626000000	17830000000	18587000000	1861500000	3338100000	25996000000	7900400000	14912000000	10543000000	27099000000	15358000000	5862200000	16169000000	24311000000	6862700000	14620000000	27416000000	5755900000	16327000000	6413500000	7910700000	6811500000	28018000000	7150800000	37042000000	8932400000	18718000000	38700000000	37186000000	34199000000	7851100000
P11940;E7EQV3;E7ERJ7	7	Polyadenylate-binding protein 1;Polyadenylate-binding protein	PABPC1	sp|P11940|PABP1_HUMAN Polyadenylate-binding protein 1 OS=Homo sapiens OX=9606 GN=PABPC1 PE=1 SV=2;tr|E7EQV3|E7EQV3_HUMAN Isoform of P11940, Polyadenylate-binding protein OS=Homo sapiens OX=9606 GN=PABPC1 PE=1 SV=1;tr|E7ERJ7|E7ERJ7_HUMAN Isoform of P11940,	4144900000	5455200000	3087900000	7071900000	2435700000	30248000000	23480000000	4703000000	3900300000	2982200000	7550900000	2243600000	20332000000	3073800000	7142800000	7939000000	26620000000	1999200000	2487800000	8951600000	4533900000	7917600000	3568600000	16389000000	11038000000	3536600000	10037000000	18304000000	2598700000	54255000000	65234000000	16301000000	4048700000	10388000000	3190500000	7580000000	27791000000	3503000000	12657000000	5232400000	46178000000	11566000000	35091000000	37617000000	11478000000
Q02413	1	Desmoglein-1	DSG1	sp|Q02413|DSG1_HUMAN Desmoglein-1 OS=Homo sapiens OX=9606 GN=DSG1 PE=1 SV=2	183830000000	4322800000	8692700000	29526000000	796430000	6146400000	2290800000	7747600000	1683500000	3644300000	6393900000	1429200000	34688000000	4745700000	11439000000	11497000000	2813700000	4551800000	7856100000	7192000000	36683000000	9615100000	7590700000	135040000000	32022000000	1173100000	3243500000	14855000000	4038400000	3297900000	3443400000	590670000	3422800000	2510700000	7863900000	1421700000	3685200000	2230600000	5880300000	13844000000	2466200000	54744000000	87804000000	13473000000	5181700000
P31150	2	Rab GDP dissociation inhibitor alpha	GDI1	sp|P31150|GDIA_HUMAN Rab GDP dissociation inhibitor alpha OS=Homo sapiens OX=9606 GN=GDI1 PE=1 SV=2	11130000000	20394000000	17754000000	14140000000	2858300000	20945000000	2729700000	23950000000	13903000000	9302700000	6826700000	2949200000	52668000000	2294500000	7546700000	8649200000	33056000000	9297900000	15242000000	6881900000	5240100000	7878700000	6373500000	48169000000	26931000000	1741900000	9104600000	12937000000	10420000000	19865000000	20165000000	2314700000	21831000000	17019000000	8181900000	5651500000	3890200000	4866500000	9293300000	23753000000	22635000000	7134700000	25485000000	9323300000	45492000000
P68366;P68366-2	6	Tubulin alpha-4A chain	TUBA4A	sp|P68366|TBA4A_HUMAN Tubulin alpha-4A chain OS=Homo sapiens OX=9606 GN=TUBA4A PE=1 SV=1;sp|P68366-2|TBA4A-2_HUMAN Isoform of P68366, Isoform 2 of Tubulin alpha-4A chain OS=Homo sapiens OX=9606 GN=TUBA4A PE=1 SV=1	4178000000	3524300000	20968000000	1583800000	5648400000	4622500000	134110000	19682000000	931500000	36732000000	13101000000	4353700000	6265900000	1352800000	74646000000	17715000000	2082000000	445450000	1437400000	3901300000	5398000000	2747200000	42492000000	14977000000	35952000000	2344400000	27390000000	29429000000	6107900000	359570000	15402000000	3203600000	2655400000	2260800000	3232600000	724260000	20506000000	120910000	69476000000	7965500000	20456000000	35624000000	21044000000	3001700000	12423000000
G3V5Z7;P60900;G3V295;G3V3I1	9	Proteasome subunit alpha type;Proteasome subunit alpha type-6	PSMA6	tr|G3V5Z7|G3V5Z7_HUMAN Isoform of P60900, Proteasome subunit alpha type OS=Homo sapiens OX=9606 GN=PSMA6 PE=1 SV=1;sp|P60900|PSA6_HUMAN Proteasome subunit alpha type-6 OS=Homo sapiens OX=9606 GN=PSMA6 PE=1 SV=1;tr|G3V295|G3V295_HUMAN Isoform of P60900, Pro	2431600000	4153400000	2682900000	4565300000	3890300000	5952600000	2116000000	4869000000	2064700000	1786200000	2397000000	599210000	105790000000	898410000	2539500000	5576600000	7617900000	4491700000	1835100000	5112000000	13172000000	4233100000	19073000000	404260000000	7606700000	432980000	4762700000	13030000000	3928900000	5082000000	6277600000	508160000	3265500000	3518800000	18338000000	1979100000	1614200000	66038000	3395900000	3045900000	3701500000	75633000000	15909000000	5727800000	15625000000
Q96GW7;Q96GW7-2	6	Brevican core protein	BCAN	sp|Q96GW7|PGCB_HUMAN Brevican core protein OS=Homo sapiens OX=9606 GN=BCAN PE=1 SV=2;sp|Q96GW7-2|PGCB-2_HUMAN Isoform of Q96GW7, Isoform 2 of Brevican core protein OS=Homo sapiens OX=9606 GN=BCAN PE=1 SV=2	5903600000	4563600000	4945500000	2696700000	2044500000	17460000000	4604600000	10987000000	5013700000	11016000000	5994200000	5243200000	14848000000	1986500000	7033800000	9173000000	8767700000	893180000	696070000	14029000000	1805400000	11053000000	6133700000	14615000000	8818900000	3586800000	15636000000	29156000000	3837400000	81828000000	35220000000	7345600000	5108000000	7450800000	4845600000	10787000000	22712000000	6630200000	16223000000	5492200000	29310000000	12267000000	27204000000	85530000000	6174100000
E7EQL8	2	Gamma-tubulin complex component 6	TUBGCP6	tr|E7EQL8|E7EQL8_HUMAN Isoform of Q96RT7, Gamma-tubulin complex component 6 OS=Homo sapiens OX=9606 GN=TUBGCP6 PE=1 SV=1	170480000	53132000	4056500	8301400	174160000	196260000	229650	29118000000	8405400000	6991300	3603100	3406800	763610000	1290600	7697900000	73605000	3678000000	2555100000	7091600	22537000	206030000	20874000	1086000000	3472200000	87898000	208090000000	5767300000	137200000	122160000	1297300000	642020000	634720000	15992000	14431000	1976800	3595400	298750000	177410000	3527000000	114430000	91457000000	264730000	11809000000	17109000000	368450000
Q16181-2	1	Septin-7	SEPTIN7	sp|Q16181-2|SEPT7-2_HUMAN Isoform of Q16181, Isoform 2 of Septin-7 OS=Homo sapiens OX=9606 GN=SEPT7 PE=1 SV=2	1890300000	14375000000	13890000000	1670900000	3905400000	7888400000	6565600000	19338000000	11395000000	24044000000	12085000000	7686300000	32313000000	1835900000	17670000000	24779000000	44038000000	3624400000	10536000000	6772600000	2698100000	14569000000	11224000000	36374000000	35100000000	4011100000	11675000000	20546000000	13792000000	7557100000	32390000000	1739200000	23383000000	9959800000	7865100000	2148300000	10579000000	252410000	18324000000	12331000000	16987000000	5571900000	20305000000	14898000000	24711000000
J3KQ32;Q9NTK5;Q9NTK5-3	4	Obg-like ATPase 1	OLA1	tr|J3KQ32|J3KQ32_HUMAN Isoform of Q9NTK5, Obg-like ATPase 1 OS=Homo sapiens OX=9606 GN=OLA1 PE=1 SV=1;sp|Q9NTK5|OLA1_HUMAN Obg-like ATPase 1 OS=Homo sapiens OX=9606 GN=OLA1 PE=1 SV=2;sp|Q9NTK5-3|OLA1-3_HUMAN Isoform of Q9NTK5, Isoform 3 of Obg-like ATPase	1664900000	11423000000	11579000000	3885300000	4480300000	22513000000	4494700000	13829000000	9724400000	11754000000	15465000000	3666500000	31359000000	3427200000	17376000000	14561000000	24966000000	1535500000	1587200000	12458000000	7687200000	8603700000	9699300000	25339000000	16240000000	4634800000	22332000000	28894000000	7067200000	6295000000	36204000000	5568200000	12658000000	5958500000	6813400000	1252500000	13466000000	236850000	35783000000	10406000000	31682000000	15021000000	29337000000	13999000000	18519000000
P02768;A0A0C4DGB6;H0YA55;D6RHD5;C9JKR2;P02768-2;P02768-3	7	Serum albumin	ALB	sp|P02768|ALBU_HUMAN Serum albumin OS=Homo sapiens OX=9606 GN=ALB PE=1 SV=2;tr|A0A0C4DGB6|A0A0C4DGB6_HUMAN Isoform of P02768, Serum albumin OS=Homo sapiens OX=9606 GN=ALB PE=1 SV=1;tr|H0YA55|H0YA55_HUMAN Isoform of P02768, Serum albumin (Fragment) OS=Homo	6482500000	13419000000	3356100000	3981400000	1848400000	19271000000	2450900000	4895500000	3088900000	4112200000	4584700000	5164400000	5890300000	1476300000	11782000000	10054000000	17919000000	36180000000	1541300000	176680000000	7292800000	36355000000	20909000000	81413000000	8537100000	3750500000	8540400000	17519000000	8323400000	40428000000	3969600000	2332800000	5758100000	3063100000	2801500000	1913300000	3857300000	1766600000	10719000000	7651700000	58125000000	30939000000	52197000000	7057500000	13128000000
P16298;P16298-4;Q5F2F8;P16298-2	4	Serine/threonine-protein phosphatase 2B catalytic subunit beta isoform;Serine/threonine-protein phosphatase	PPP3CB	sp|P16298|PP2BB_HUMAN Serine/threonine-protein phosphatase 2B catalytic subunit beta isoform OS=Homo sapiens OX=9606 GN=PPP3CB PE=1 SV=2;sp|P16298-4|PP2BB-4_HUMAN Isoform of P16298, Isoform 4 of Serine/threonine-protein phosphatase 2B catalytic subunit bet	2367500000	4552100000	4887700000	2628000000	2817300000	9251300000	7886900000	7229300000	4156400000	10490000000	9109900000	3431500000	30635000000	2137400000	8019500000	11113000000	24672000000	1481900000	1404200000	9218800000	3806900000	9438800000	37217000000	13217000000	14911000000	2438000000	29741000000	42723000000	4950200000	34719000000	50223000000	7937900000	1129800000	7134800000	2897800000	2979300000	23670000000	3465200000	24121000000	5241100000	30500000000	8153200000	30482000000	28619000000	10263000000
P17655	1	Calpain-2 catalytic subunit	CAPN2	sp|P17655|CAN2_HUMAN Calpain-2 catalytic subunit OS=Homo sapiens OX=9606 GN=CAPN2 PE=1 SV=6	5948000000	8447800000	7662800000	4934200000	2696500000	24186000000	2680000000	14212000000	6044600000	5996300000	6073400000	3442000000	24741000000	2125800000	8000300000	7784900000	12494000000	863110000	249970000	8531600000	3177300000	5774500000	5259700000	14359000000	7571500000	7362700000	15957000000	43319000000	2303000000	45966000000	50668000000	4828900000	19309000000	10695000000	5194400000	7366300000	23979000000	10829000000	19836000000	9088400000	39868000000	20555000000	67350000000	39975000000	8664000000
Q9UEY8-2	1	Gamma-adducin	ADD3	sp|Q9UEY8-2|ADDG-2_HUMAN Isoform of Q9UEY8, Isoform 1 of Gamma-adducin OS=Homo sapiens OX=9606 GN=ADD3 PE=1 SV=1	5591500000	4753900000	5322200000	3262200000	2380900000	13454000000	2201800000	10650000000	5532400000	6528500000	23837000000	2530000000	10507000000	2080600000	12194000000	9262400000	23688000000	2347800000	1359900000	14934000000	2599300000	9495600000	6353400000	119990000000	16011000000	7311300000	21494000000	36648000000	3835000000	28087000000	31557000000	4105600000	15316000000	6838800000	5549100000	4039300000	12103000000	2279300000	13181000000	5345100000	23462000000	10689000000	26484000000	30242000000	14065000000
P67775;P67775-2	2	Serine/threonine-protein phosphatase 2A catalytic subunit alpha isoform	PPP2CA	sp|P67775|PP2AA_HUMAN Serine/threonine-protein phosphatase 2A catalytic subunit alpha isoform OS=Homo sapiens OX=9606 GN=PPP2CA PE=1 SV=1;sp|P67775-2|PP2AA-2_HUMAN Isoform of P67775, Isoform 2 of Serine/threonine-protein phosphatase 2A catalytic subunit al	6375400000	10171000000	10401000000	6753600000	3568800000	198680000000	3598200000	12503000000	7622400000	17503000000	7891100000	4044500000	20486000000	2014200000	13934000000	12305000000	30836000000	5062700000	4973800000	11806000000	4445200000	8491700000	18673000000	19370000000	12949000000	3238300000	17506000000	17633000000	7523300000	14703000000	27462000000	6500300000	8066200000	5780800000	7368200000	5272300000	14563000000	148900000	19484000000	6859600000	26690000000	6614700000	15088000000	12153000000	12203000000
P02679-2;P02679;C9JEU5;C9JC84	4	Fibrinogen gamma chain	FGG	sp|P02679-2|FIBG-2_HUMAN Isoform of P02679, Isoform Gamma-A of Fibrinogen gamma chain OS=Homo sapiens OX=9606 GN=FGG PE=1 SV=3;sp|P02679|FIBG_HUMAN Fibrinogen gamma chain OS=Homo sapiens OX=9606 GN=FGG PE=1 SV=3;tr|C9JEU5|C9JEU5_HUMAN Isoform of P02679, Fi	2463900000	6428500000	14972000000	4876700000	2431600000	17740000000	2499000000	3743100000	2609400000	2428100000	7208100000	2857200000	5901000000	3059100000	12024000000	50056000000	14705000000	3601400000	1424300000	4913600000	1469700000	2136400000	14124000000	23242000000	3071300000	4367700000	4872400000	20005000000	4014900000	12117000000	34864000000	5054700000	1673900000	16854000000	3856600000	4594300000	20826000000	3086000000	10199000000	10076000000	19429000000	3384600000	14013000000	24498000000	22349000000
Q14974;Q14974-2;J3KTM9	6	Importin subunit beta-1	KPNB1	sp|Q14974|IMB1_HUMAN Importin subunit beta-1 OS=Homo sapiens OX=9606 GN=KPNB1 PE=1 SV=2;sp|Q14974-2|IMB1-2_HUMAN Isoform of Q14974, Isoform 2 of Importin subunit beta-1 OS=Homo sapiens OX=9606 GN=KPNB1 PE=1 SV=2;tr|J3KTM9|J3KTM9_HUMAN Isoform of Q14974, Im	10374000000	8669200000	9573800000	5571900000	5731300000	25844000000	2023800000	14661000000	11473000000	22425000000	7477400000	5442000000	18864000000	4146400000	17403000000	28328000000	16716000000	3771500000	3720200000	15631000000	5706500000	20871000000	19925000000	33249000000	15428000000	7497200000	17408000000	28925000000	9541400000	13977000000	15976000000	2452800000	17576000000	8914500000	6092800000	4172900000	16527000000	5067800000	12255000000	7742600000	11150000000	30816000000	33631000000	23318000000	8871900000
Q14240;Q14240-2;E7EQG2	8	Eukaryotic initiation factor 4A-II;Eukaryotic initiation factor 4A-II, N-terminally processed	EIF4A2	sp|Q14240|IF4A2_HUMAN Eukaryotic initiation factor 4A-II OS=Homo sapiens OX=9606 GN=EIF4A2 PE=1 SV=2;sp|Q14240-2|IF4A2-2_HUMAN Isoform of Q14240, Isoform 2 of Eukaryotic initiation factor 4A-II OS=Homo sapiens OX=9606 GN=EIF4A2 PE=1 SV=2;tr|E7EQG2|E7EQG2_H	5110200000	10894000000	9269300000	3385000000	5147600000	13302000000	6139000000	14901000000	8813400000	17712000000	9832300000	3029800000	25600000000	3025900000	20217000000	22799000000	23785000000	1687000000	2797900000	14471000000	4011100000	24227000000	17882000000	40918000000	17548000000	3494500000	17326000000	30227000000	11454000000	2937200000	18983000000	3766000000	8376300000	7740200000	5503300000	2093700000	18290000000	181390000	25210000000	9272100000	16920000000	17048000000	62122000000	8512100000	18767000000
O14594	2	Neurocan core protein	NCAN	sp|O14594|NCAN_HUMAN Neurocan core protein OS=Homo sapiens OX=9606 GN=NCAN PE=1 SV=3	3899100000	5686600000	3810200000	3795400000	3313700000	1120200000	951800000	12341000000	5374700000	9224500000	7802700000	2846600000	17495000000	1524800000	11544000000	14115000000	3966200000	337080000	913990000	17624000000	4275600000	13381000000	4412400000	21599000000	7801900000	302760000	26051000000	85176000000	6358300000	16408000000	26463000000	11551000000	282360000	6254000000	4295700000	2833600000	21221000000	4355600000	24556000000	6645800000	28228000000	20697000000	43524000000	29171000000	11129000000
P04350	9	Tubulin beta-4A chain	TUBB4A	sp|P04350|TBB4A_HUMAN Tubulin beta-4A chain OS=Homo sapiens OX=9606 GN=TUBB4A PE=1 SV=2	1411000000	1820400000	19616000000	2106600000	4072200000	552500000	248920000	12586000000	591000000	39776000000	10425000000	3033700000	3454000000	1015700000	53970000000	9267300000	6951300000	481340000	703730000	4598900000	8208800000	2115400000	44578000000	3928200000	18141000000	1340900000	34482000000	98381000000	2848400000	643630000	9745400000	3865500000	3062600000	1288300000	6173200000	1191900000	9418500000	245310000	43711000000	7400400000	36315000000	14675000000	26656000000	2369400000	5851000000
Q14894;I3L325	5	Ketimine reductase mu-crystallin	CRYM	sp|Q14894|CRYM_HUMAN Ketimine reductase mu-crystallin OS=Homo sapiens OX=9606 GN=CRYM PE=1 SV=1;tr|I3L325|I3L325_HUMAN Isoform of Q14894, Ketimine reductase mu-crystallin (Fragment) OS=Homo sapiens OX=9606 GN=CRYM PE=1 SV=1	4451900000	11537000000	13761000000	4476300000	3165300000	38662000000	5181800000	12937000000	10763000000	3265500000	15052000000	4380100000	18274000000	6009900000	9482200000	5729400000	34266000000	8960100000	2884300000	7026200000	386610000	2638600000	2653300000	11740000000	7093000000	705180000	3684600000	4640900000	4897400000	31856000000	114010000000	4172800000	12250000000	5510700000	11380000000	1843500000	6361400000	476480000	983930000	3461100000	24425000000	8987900000	13765000000	40297000000	13334000000
P01834	1	Ig kappa chain C region	IGKC	sp|P01834|IGKC_HUMAN Immunoglobulin kappa constant OS=Homo sapiens OX=9606 GN=IGKC PE=1 SV=2	6592400000	3926700000	3449000000	5039300000	1221600000	8961300000	4274300000	3009400000	3556500000	1427600000	3999500000	2461200000	5672600000	2432400000	4703900000	7706500000	4465700000	10347000000	2473600000	19280000000	14928000000	4596700000	2424600000	30213000000	11458000000	1788800000	5000500000	11263000000	4972600000	10582000000	16300000000	6269700000	27054000000	8356700000	3434000000	2775000000	14811000000	262870000	29525000000	11214000000	19059000000	34686000000	34015000000	15126000000	18276000000
P98164	3	Low-density lipoprotein receptor-related protein 2	LRP2	sp|P98164|LRP2_HUMAN Low-density lipoprotein receptor-related protein 2 OS=Homo sapiens OX=9606 GN=LRP2 PE=1 SV=3	1045000000	1959300000	224790000	1101200000	28048000	237740000	1042100000	132090000	1372300000	1869600000	1300800000	41842000	1747500000	883520000	311000000	2068900000	1056900000	1542100000	156590000	134780000000	69452000	492370000	356190000	18407000000	169590000	3863700000	188120000000	275690000000	225670000	760380000	437960000	84773000	129270000000	138030000	11984000	611150000	9165400000	210560000	71146000000	3489800000	1218600000	233700000	990210000	17780000000	113330000
P63010;P63010-2;A0A087X253;P63010-3;A0A087WU93;A0A087WZQ6;A0A087WYD1	12	AP-2 complex subunit beta	AP2B1	sp|P63010|AP2B1_HUMAN AP-2 complex subunit beta OS=Homo sapiens OX=9606 GN=AP2B1 PE=1 SV=1;sp|P63010-2|AP2B1-2_HUMAN Isoform of P63010, Isoform 2 of AP-2 complex subunit beta OS=Homo sapiens OX=9606 GN=AP2B1 PE=1 SV=1;tr|A0A087X253|A0A087X253_HUMAN Isoform	4633000000	7359300000	6967500000	6185000000	4623400000	8248800000	2731000000	14997000000	7084600000	17050000000	7212500000	4115200000	19284000000	2314500000	13245000000	20932000000	19452000000	2111000000	3253400000	13481000000	3928700000	15929000000	15647000000	33873000000	18361000000	2676900000	14054000000	29160000000	12016000000	30386000000	20536000000	3182900000	5870700000	6985600000	5459500000	3216500000	15009000000	4730100000	26179000000	7650700000	16874000000	25032000000	31470000000	21199000000	9926500000
Q4G0N4;Q4G0N4-3	2	NAD kinase 2, mitochondrial	NADK2	sp|Q4G0N4|NAKD2_HUMAN NAD kinase 2, mitochondrial OS=Homo sapiens OX=9606 GN=NADK2 PE=1 SV=2;sp|Q4G0N4-3|NAKD2-3_HUMAN Isoform of Q4G0N4, Isoform 3 of NAD kinase 2, mitochondrial OS=Homo sapiens OX=9606 GN=NADK2 PE=1 SV=2	2793500000	4180100000	2838000000	2902000000	2292400000	19464000000	19116000000	5388300000	2599900000	4522100000	5606100000	1009500000	14341000000	1569600000	6434000000	12218000000	27455000000	2774300000	3615300000	10019000000	6216100000	6067800000	7125000000	8001700000	8317700000	5479200000	11625000000	43266000000	5547400000	30347000000	45644000000	6756900000	5262100000	6191800000	3905300000	5449100000	16291000000	359930000	8614600000	4326400000	30358000000	3987700000	40758000000	31193000000	9241000000
P16083;Q5TD07;Q5TD05	4	Ribosyldihydronicotinamide dehydrogenase [quinone]	NQO2	sp|P16083|NQO2_HUMAN Ribosyldihydronicotinamide dehydrogenase [quinone] OS=Homo sapiens OX=9606 GN=NQO2 PE=1 SV=5;tr|Q5TD07|Q5TD07_HUMAN Isoform of P16083, Ribosyldihydronicotinamide dehydrogenase [quinone] OS=Homo sapiens OX=9606 GN=NQO2 PE=1 SV=1;tr|Q5TD	3953100000	7536400000	1237700000	6084100000	3291200000	27785000000	5702400000	11389000000	5971700000	1991100000	4409300000	1254400000	22005000000	2633500000	4510700000	7461200000	17182000000	6293800000	1844100000	9149900000	378710000	4622100000	3711200000	12638000000	2860300000	1251700000	5417800000	5611300000	4984000000	33960000000	46462000000	6451400000	6735900000	423470000	4589600000	5573500000	9223800000	505140000	2361100000	4170000000	24102000000	13205000000	56124000000	24192000000	9126800000
O75223;M0QZK8;B8ZZK2	8	Gamma-glutamylcyclotransferase	GGCT	sp|O75223|GGCT_HUMAN Gamma-glutamylcyclotransferase OS=Homo sapiens OX=9606 GN=GGCT PE=1 SV=1;tr|M0QZK8|M0QZK8_HUMAN Uncharacterized protein OS=Homo sapiens OX=9606 PE=4 SV=1;tr|B8ZZK2|B8ZZK2_HUMAN Isoform of O75223, Gamma-glutamylcyclotransferase OS=Homo	17660000000	8621700000	9505900000	18175000000	2943200000	323640000	1761400000	10868000000	1065200000	3804500000	3792200000	781310000	18946000000	6721400000	8302600000	3583100000	3215800000	2085200000	1472100000	9581300000	38939000000	6829000000	4007100000	90039000000	100760000000	1301000000	9321600000	8223000000	3227000000	2564900000	3891600000	565720000	2460800000	7345600000	989500000	72199000	1121000000	10954000000	4370600000	10757000000	3558700000	25636000000	9900100000	5782900000	7389300000
A0A494C1B4;A0A494C0U4;A0A494C055;A0A494C087;P23471-2;P23471;A0A494C1R4;A0A494C1H9;A0A494C036;P23471-3	11	Receptor-type tyrosine-protein phosphatase zeta	PTPRZ1	tr|A0A494C1B4|A0A494C1B4_HUMAN Isoform of P23471, Receptor-type tyrosine-protein phosphatase zeta OS=Homo sapiens OX=9606 GN=PTPRZ1 PE=4 SV=1;tr|A0A494C0U4|A0A494C0U4_HUMAN Isoform of P23471, Receptor-type tyrosine-protein phosphatase zeta OS=Homo sapiens	4721200000	3095500000	2291200000	3107500000	2811900000	17489000000	6237300000	6058700000	3765200000	4921200000	3944200000	1819900000	11426000000	1646200000	8428100000	9000800000	11303000000	1093000000	1559800000	11855000000	2054100000	7281500000	5408500000	12940000000	8432900000	2988200000	12683000000	35586000000	3495100000	68037000000	22035000000	5433400000	1787300000	5429000000	4101700000	5487100000	10623000000	5522800000	10145000000	3514300000	18896000000	12535000000	53040000000	54616000000	8058500000
P20916-3;P20916-2;P20916	6	Myelin-associated glycoprotein	MAG	sp|P20916-3|MAG-3_HUMAN Isoform of P20916, Isoform 3 of Myelin-associated glycoprotein OS=Homo sapiens OX=9606 GN=MAG PE=1 SV=1;sp|P20916-2|MAG-2_HUMAN Isoform of P20916, Isoform 2 of Myelin-associated glycoprotein OS=Homo sapiens OX=9606 GN=MAG PE=1 SV=1;	747100000	300410000	465840000	2346300000	777360000	61568000000	5933900000	926590000	829360000	3825800000	3809200000	984550000	4889700000	333810000	733580000	2652600000	12123000000	1803100000	408040000	3319400000	285740000	4642100000	881600000	2595400000	1309800000	1570000000	1871000000	18183000000	662950000	116140000000	43565000000	4866600000	1593600000	1909200000	1240100000	4266000000	9037900000	19171000000	2699100000	592860000	11732000000	1723700000	9310400000	60864000000	3168700000
Q9Y2A7;Q9Y2A7-2	2	Nck-associated protein 1	NCKAP1	sp|Q9Y2A7|NCKP1_HUMAN Nck-associated protein 1 OS=Homo sapiens OX=9606 GN=NCKAP1 PE=1 SV=1;sp|Q9Y2A7-2|NCKP1-2_HUMAN Isoform of Q9Y2A7, Isoform 2 of Nck-associated protein 1 OS=Homo sapiens OX=9606 GN=NCKAP1 PE=1 SV=1	9804200000	3780400000	6170000000	2018600000	3289900000	3107800000	22378000	9146600000	3613600000	10306000000	4915200000	3396600000	13356000000	1148600000	11458000000	13548000000	7500400000	1791800000	1290400000	10910000000	6324800000	3953000000	17163000000	22063000000	12728000000	3885500000	19411000000	51433000000	5264500000	7024200000	14658000000	3576600000	3722200000	3903200000	4027300000	3642300000	32528000000	3159800000	40664000000	5236300000	13601000000	24641000000	33474000000	17020000000	4458300000
Q86YZ3	1	Hornerin	HRNR	sp|Q86YZ3|HORN_HUMAN Hornerin OS=Homo sapiens OX=9606 GN=HRNR PE=1 SV=2	39970000000	3777000000	10207000000	24959000000	1215700000	9026400000	2094200000	8504600000	1988300000	5426100000	11775000000	2284000000	34889000000	5703500000	11588000000	8471700000	3244300000	5271100000	8202100000	7253200000	24180000000	14322000000	16454000000	77280000000	13598000000	3077900000	4300900000	30215000000	7797300000	5203800000	3058000000	1067100000	5489700000	3007900000	10035000000	3171300000	5651500000	2514100000	8416400000	20679000000	4173800000	29732000000	39291000000	6816500000	7048600000
E7EVJ5;Q96F07-2;H7C229	10	Cytoplasmic FMR1-interacting protein 2	CYFIP2	tr|E7EVJ5|E7EVJ5_HUMAN Isoform of Q96F07, Cytoplasmic FMR1-interacting protein OS=Homo sapiens OX=9606 GN=CYFIP2 PE=1 SV=1;sp|Q96F07-2|CYFP2-2_HUMAN Isoform of Q96F07, Isoform 2 of Cytoplasmic FMR1-interacting protein 2 OS=Homo sapiens OX=9606 GN=CYFIP2 PE	3110600000	3188900000	5022400000	2592200000	2810000000	4613800000	10492000	8953700000	3733700000	12356000000	5366700000	5474600000	10747000000	1111600000	13574000000	28767000000	6064100000	1563700000	858610000	12817000000	2762100000	4878900000	15688000000	22085000000	11671000000	2341300000	21677000000	41335000000	5346000000	8782500000	12356000000	4504200000	3571400000	3529500000	4459500000	3432500000	28799000000	3145100000	44743000000	3430600000	15945000000	28079000000	28808000000	14362000000	5180300000
P61158;B4DXW1	5	Actin-related protein 3	ACTR3	sp|P61158|ARP3_HUMAN Actin-related protein 3 OS=Homo sapiens OX=9606 GN=ACTR3 PE=1 SV=3;tr|B4DXW1|B4DXW1_HUMAN Isoform of P61158, Actin-related protein 3 OS=Homo sapiens OX=9606 GN=ACTR3 PE=1 SV=1	3999200000	6762300000	6143500000	3290500000	2101400000	6262900000	6568600000	8398400000	4145300000	6517800000	8372600000	1404400000	19151000000	1205200000	8446500000	8012200000	19077000000	2619700000	2608400000	10069000000	4117300000	8715600000	5951300000	16971000000	10949000000	4122800000	18001000000	34283000000	4298100000	18540000000	31182000000	4700800000	11765000000	5057500000	4897200000	2447500000	15680000000	295330000	16919000000	7458000000	27514000000	4335000000	30471000000	16012000000	8614900000
P11413-2;P11413;P11413-3	4	Glucose-6-phosphate 1-dehydrogenase	G6PD	sp|P11413-2|G6PD-2_HUMAN Isoform of P11413, Isoform Long of Glucose-6-phosphate 1-dehydrogenase OS=Homo sapiens OX=9606 GN=G6PD PE=1 SV=4;sp|P11413|G6PD_HUMAN Glucose-6-phosphate 1-dehydrogenase OS=Homo sapiens OX=9606 GN=G6PD PE=1 SV=4;sp|P11413-3|G6PD-3_	3365300000	6914500000	6319900000	4927100000	2108700000	19701000000	2324200000	8089100000	4698400000	4857200000	7224000000	1777500000	16720000000	2128600000	11335000000	10496000000	22156000000	2590600000	3777300000	9223200000	3335600000	6693700000	5895600000	14058000000	8623100000	4901200000	8906300000	20111000000	5219300000	34675000000	34570000000	4153200000	13486000000	7017300000	4878500000	5656100000	11932000000	1281100000	14180000000	7301500000	30032000000	5551700000	41903000000	20414000000	15522000000
Q9BT78;D6RFN0;D6RAX7;Q9BT78-2;D6RD63	6	COP9 signalosome complex subunit 4	COPS4	sp|Q9BT78|CSN4_HUMAN COP9 signalosome complex subunit 4 OS=Homo sapiens OX=9606 GN=COPS4 PE=1 SV=1;tr|D6RFN0|D6RFN0_HUMAN Isoform of Q9BT78, COP9 signalosome complex subunit 4 OS=Homo sapiens OX=9606 GN=COPS4 PE=1 SV=1;tr|D6RAX7|D6RAX7_HUMAN Isoform of Q9B	4902600000	8369200000	10134000000	3952000000	8153100000	12551000000	1679500000	8444300000	7283000000	21411000000	10058000000	2987600000	23369000000	2376200000	13285000000	8964600000	16533000000	2571900000	4351600000	14021000000	7489500000	9648600000	7229400000	14707000000	10937000000	2479200000	16069000000	18536000000	6718600000	47822000000	15028000000	3432700000	9083700000	5115300000	6565800000	3747600000	9546300000	304740000	16290000000	7260600000	78899000000	11127000000	22871000000	8058300000	12689000000
A0A286YEY1;P01876	2	Ig alpha-1 chain C region	IGHA1	tr|A0A286YEY1|A0A286YEY1_HUMAN Isoform of P01876, Immunoglobulin heavy constant alpha 1 (Fragment) OS=Homo sapiens OX=9606 GN=IGHA1 PE=1 SV=1;sp|P01876|IGHA1_HUMAN Immunoglobulin heavy constant alpha 1 OS=Homo sapiens OX=9606 GN=IGHA1 PE=1 SV=2	2131000000	4916300000	4229500000	7681500000	2671700000	5304000000	1035500000	2741700000	3939700000	1441500000	3500300000	2418600000	4875900000	2001800000	4419300000	9877900000	6591300000	9846100000	677910000	9541700000	1420900000	7718200000	2142700000	30035000000	4050500000	4675100000	7678800000	13352000000	2463700000	12938000000	8774300000	6020400000	30928000000	23520000000	1168600000	2175600000	17287000000	11921000000	48102000000	17709000000	23608000000	9576500000	58512000000	24363000000	7241700000
P63267;P63267-2	6	Actin, gamma-enteric smooth muscle	ACTG2	sp|P63267|ACTH_HUMAN Actin, gamma-enteric smooth muscle OS=Homo sapiens OX=9606 GN=ACTG2 PE=1 SV=1;sp|P63267-2|ACTH-2_HUMAN Isoform of P63267, Isoform 2 of Actin, gamma-enteric smooth muscle OS=Homo sapiens OX=9606 GN=ACTG2 PE=1 SV=1	2729400000	8367600000	4021000000	2802600000	1680800000	1283800000	812540000	12853000000	2533700000	11511000000	6396000000	1902700000	16452000000	209980000	41174000000	8260700000	3901500000	641910000	1515400000	14949000000	982610000	2963100000	3415100000	84848000000	2316300000	2479000000	1916900000	10731000000	1957900000	11040000000	66635000000	2602600000	21772000000	10830000000	3440900000	1422900000	10083000000	79379000	13321000000	3244700000	11050000000	2292300000	5038800000	47859000000	2048900000
P69905	1	Hemoglobin subunit alpha	HBA1	sp|P69905|HBA_HUMAN Hemoglobin subunit alpha OS=Homo sapiens OX=9606 GN=HBA2 PE=1 SV=2	1673800000	21066000000	26099000000	32102000000	2864600000	17758000000	5650700000	48948000000	4759700000	2751200000	14262000000	1167300000	24108000000	373790000	5323200000	74286000000	38435000000	4000500000	416540000	10246000000	2229000000	1835400000	10486000000	8351700000	1338700000	3603600000	15656000000	15441000000	974040000	8354400000	11780000000	2292200000	27784000000	11532000000	1961700000	1655100000	3116900000	308460000	9206400000	13737000000	10382000000	1507400000	22561000000	5975900000	11968000000
Q9Y490	1	Talin-1	TLN1	sp|Q9Y490|TLN1_HUMAN Talin-1 OS=Homo sapiens OX=9606 GN=TLN1 PE=1 SV=3	9027800000	4166800000	3892600000	3105400000	963150000	17761000000	983150000	7370900000	6057500000	3741800000	6481500000	1031000000	8265100000	1947100000	27455000000	13072000000	15374000000	6157800000	2370000000	24575000000	2939200000	11658000000	3387800000	33549000000	9902600000	11290000000	11941000000	8433200000	3150200000	22546000000	18491000000	3240900000	13132000000	5881500000	4073800000	4820800000	5266800000	4956600000	15487000000	17025000000	6283500000	21619000000	75174000000	19893000000	9519900000
P13716	2	Delta-aminolevulinic acid dehydratase	ALAD	sp|P13716|HEM2_HUMAN Delta-aminolevulinic acid dehydratase OS=Homo sapiens OX=9606 GN=ALAD PE=1 SV=1	5091600000	8821400000	9077700000	3680200000	2809500000	36613000000	1409700000	10655000000	5349700000	3784300000	3697200000	1075400000	8818700000	1852100000	8740700000	7556200000	9461900000	7005700000	3834500000	11663000000	5359200000	4173000000	3482100000	16479000000	9325300000	5498800000	11955000000	28413000000	3760100000	24631000000	43617000000	1954300000	19690000000	4405900000	6794700000	7170600000	13897000000	226150000	9515800000	6032800000	26109000000	5487900000	39681000000	23181000000	17616000000
P26641;P26641-2	2	Elongation factor 1-gamma	EEF1G	sp|P26641|EF1G_HUMAN Elongation factor 1-gamma OS=Homo sapiens OX=9606 GN=EEF1G PE=1 SV=3;sp|P26641-2|EF1G-2_HUMAN Isoform of P26641, Isoform 2 of Elongation factor 1-gamma OS=Homo sapiens OX=9606 GN=EEF1G PE=1 SV=3	6569600000	9659900000	8230100000	4694100000	4624500000	20179000000	397220000	10100000000	6660000000	6697300000	7773200000	1374500000	13445000000	3079300000	11368000000	9132700000	20714000000	3125400000	5828400000	11747000000	6005700000	11618000000	11562000000	27330000000	14758000000	151340000000	10794000000	9794700000	8485900000	2893700000	32962000000	510320000	10249000000	6368300000	6412800000	2713000000	2633200000	766000000	8216800000	8562800000	3669400000	11476000000	14138000000	6050100000	20932000000
P50990;P50990-3	4	T-complex protein 1 subunit theta	CCT8	sp|P50990|TCPQ_HUMAN T-complex protein 1 subunit theta OS=Homo sapiens OX=9606 GN=CCT8 PE=1 SV=4;sp|P50990-3|TCPQ-3_HUMAN Isoform of P50990, Isoform 3 of T-complex protein 1 subunit theta OS=Homo sapiens OX=9606 GN=CCT8 PE=1 SV=4	2962000000	6199400000	5776000000	4050400000	3399400000	9239100000	2765400000	7964900000	4251700000	11546000000	8108200000	1725000000	11443000000	2690700000	13482000000	18774000000	23507000000	3493700000	3170000000	12627000000	3553900000	12663000000	20369000000	18144000000	19899000000	4030300000	24648000000	27544000000	8391500000	4821200000	4521900000	1423500000	9068300000	5549000000	4778100000	2055300000	3685600000	874060000	6315400000	5283900000	6169400000	13640000000	30503000000	10040000000	9908800000
Q9UK22;A0A286YF37	3	F-box only protein 2	FBXO2	sp|Q9UK22|FBX2_HUMAN F-box only protein 2 OS=Homo sapiens OX=9606 GN=FBXO2 PE=1 SV=2;tr|A0A286YF37|A0A286YF37_HUMAN Isoform of Q9UK22, F-box only protein 2 (Fragment) OS=Homo sapiens OX=9606 GN=FBXO2 PE=1 SV=1	6634600000	16200000000	14892000000	4311700000	4811400000	14779000000	163470000	12435000000	11210000000	19087000000	5457400000	3398500000	11984000000	2494800000	23642000000	25129000000	6790800000	4752000000	5297600000	16317000000	8514200000	18755000000	11786000000	29537000000	18131000000	7381000000	14483000000	17121000000	11182000000	1413600000	6135500000	229660000	42661000000	11520000000	9252300000	3274000000	3791800000	81111000	9096900000	13904000000	5809900000	10151000000	20968000000	5269700000	18512000000
Q14194-2	1	Dihydropyrimidinase-related protein 1	CRMP1	sp|Q14194-2|DPYL1-2_HUMAN Isoform of Q14194, Isoform LCRMP-1 of Dihydropyrimidinase-related protein 1 OS=Homo sapiens OX=9606 GN=CRMP1 PE=1 SV=1	6787500000	5241600000	5046500000	5504700000	2589400000	7901400000	8695800000	6042400000	5154100000	7773200000	5914700000	2586200000	33168000000	2215500000	5068600000	15348000000	45250000000	2926200000	4175900000	5199700000	2987100000	10776000000	4742400000	19458000000	13879000000	1744600000	10915000000	21557000000	5258900000	21540000000	14845000000	1875700000	6259500000	7579200000	3452300000	2986600000	12360000000	3183500000	5695700000	7475000000	11085000000	8433500000	23874000000	11671000000	13610000000
Q03001;F8W9J4	3	Dystonin	DST	sp|Q03001|DYST_HUMAN Dystonin OS=Homo sapiens OX=9606 GN=DST PE=1 SV=4;tr|F8W9J4|F8W9J4_HUMAN Isoform of Q03001, Dystonin OS=Homo sapiens OX=9606 GN=DST PE=1 SV=1	1864900000	1095800000	1509900000	773060000	827620000	17456000000	279080000	5986100000	1050500000	2961800000	1064300000	229120000	2036200000	797360000	8431400000	6717900000	7010700000	1514400000	6688700000	6510400000	1950800000	6733300000	2917300000	10620000000	7244300000	1116800000	12823000000	3845400000	2991900000	2431900000	162270000000	473590000	3269300000	2736200000	1360800000	818020000	698990000	524030000	765610000	17379000000	135220000000	36742000000	9605600000	5179000000	5989700000
P61978-3;Q5T6W2	2	Heterogeneous nuclear ribonucleoprotein K	HNRNPK	sp|P61978-3|HNRPK-3_HUMAN Isoform of P61978, Isoform 3 of Heterogeneous nuclear ribonucleoprotein K OS=Homo sapiens OX=9606 GN=HNRNPK PE=1 SV=1;tr|Q5T6W2|Q5T6W2_HUMAN Isoform of P61978, Heterogeneous nuclear ribonucleoprotein K (Fragment) OS=Homo sapiens O	5548500000	2491300000	6083200000	2626100000	3276400000	11033000000	4998600000	6571700000	4382600000	8941500000	8646100000	4595900000	10594000000	2270400000	11950000000	10715000000	22307000000	1177400000	1293500000	15163000000	3422600000	9524000000	9447900000	16433000000	13962000000	3142700000	13733000000	22115000000	4829900000	11729000000	12286000000	2041100000	10697000000	3607800000	4325900000	5106000000	13263000000	2543700000	18887000000	5139100000	22022000000	12844000000	27967000000	10903000000	10027000000
P06733;A0A2R8Y6G6;P06733-2;K7EM90	10	Alpha-enolase;Enolase	ENO1	sp|P06733|ENOA_HUMAN Alpha-enolase OS=Homo sapiens OX=9606 GN=ENO1 PE=1 SV=2;tr|A0A2R8Y6G6|A0A2R8Y6G6_HUMAN Isoform of P06733, Alpha-enolase OS=Homo sapiens OX=9606 GN=ENO1 PE=1 SV=1;sp|P06733-2|ENOA-2_HUMAN Isoform of P06733, Isoform MBP-1 of Alpha-enolas	44258000000	15833000000	12624000000	9552500000	1030100000	8461900000	7000300000	3928200000	4572500000	1781500000	15307000000	1020000000	20597000000	1697600000	3735500000	11927000000	19912000000	3023200000	3792200000	8870100000	15981000000	6581000000	2220500000	58203000000	12853000000	2097600000	10564000000	17876000000	4827000000	10217000000	12885000000	4990100000	3126400000	3593900000	3009000000	1659500000	7279500000	193150000	2994000000	6635200000	4051500000	21154000000	39150000000	6073200000	13362000000
Q04917	3	14-3-3 protein eta	YWHAH	sp|Q04917|1433F_HUMAN 14-3-3 protein eta OS=Homo sapiens OX=9606 GN=YWHAH PE=1 SV=4	7131900000	6340800000	14026000000	3335900000	5105000000	6895900000	713350000	20783000000	10172000000	22212000000	5131600000	2560400000	25296000000	2221200000	16965000000	32603000000	14000000000	4869000000	4498300000	17685000000	3277900000	17135000000	24400000000	14874000000	23583000000	1322700000	16784000000	11759000000	20751000000	973200000	3902200000	305590000	7626400000	3100100000	6916400000	865290000	1777900000	67610000	5160100000	11366000000	3170100000	23617000000	9084500000	2998600000	34318000000
Q9UI12-2	1	V-type proton ATPase subunit H	ATP6V1H	sp|Q9UI12-2|VATH-2_HUMAN Isoform of Q9UI12, Isoform 2 of V-type proton ATPase subunit H OS=Homo sapiens OX=9606 GN=ATP6V1H PE=1 SV=1	4876700000	5714700000	9537700000	4858900000	2985600000	19409000000	2640800000	12688000000	5768200000	7853500000	6621300000	1535300000	20975000000	2208300000	10891000000	12030000000	19850000000	2287200000	5115900000	11774000000	15806000000	9452300000	8326500000	14040000000	10517000000	2615500000	11935000000	35663000000	4103000000	11314000000	26280000000	3082300000	8763800000	5087100000	5131500000	4002100000	7600900000	826700000	15556000000	8067000000	19907000000	8827300000	38143000000	13069000000	8056900000
Q15019;Q15019-2;Q15019-3;C9JB25;C9J938	13	Septin-2	SEPTIN2	sp|Q15019|SEPT2_HUMAN Septin-2 OS=Homo sapiens OX=9606 GN=SEPT2 PE=1 SV=1;sp|Q15019-2|SEPT2-2_HUMAN Isoform of Q15019, Isoform 2 of Septin-2 OS=Homo sapiens OX=9606 GN=SEPT2 PE=1 SV=1;sp|Q15019-3|SEPT2-3_HUMAN Isoform of Q15019, Isoform 3 of Septin-2 OS=Ho	4808100000	5304300000	7861300000	992110000	1958100000	5675000000	1001300000	8797500000	4742200000	6335700000	5893500000	2070100000	17847000000	1178200000	16234000000	13110000000	8049500000	1977600000	2295500000	6695200000	2152300000	7683600000	6851900000	28374000000	29132000000	4529700000	14233000000	26087000000	7334100000	10398000000	30632000000	1318000000	23239000000	7872300000	2720100000	1683600000	8624700000	381190000	15799000000	5346100000	15043000000	7721500000	27582000000	12991000000	17657000000
P29144;A0A494C0U1;A0A494C1B8	9	Tripeptidyl-peptidase 2	TPP2	sp|P29144|TPP2_HUMAN Tripeptidyl-peptidase 2 OS=Homo sapiens OX=9606 GN=TPP2 PE=1 SV=4;tr|A0A494C0U1|A0A494C0U1_HUMAN Isoform of P29144, Tripeptidyl-peptidase 2 (Fragment) OS=Homo sapiens OX=9606 GN=TPP2 PE=4 SV=1;tr|A0A494C1B8|A0A494C1B8_HUMAN Isoform of	3517400000	4839400000	2430000000	5447800000	1366800000	9584800000	343020000	9767500000	7200100000	4585400000	5045000000	2163300000	22514000000	1633300000	5871000000	8926400000	20707000000	3800700000	1427500000	8962700000	2350600000	6047900000	4036600000	11302000000	3715200000	2733500000	6386500000	15893000000	1613400000	45451000000	24637000000	8892100000	4641300000	2818800000	2469200000	6012200000	14955000000	10415000000	21086000000	2113100000	18448000000	17732000000	30609000000	57694000000	7053900000
Q08554;Q08554-2	2	Desmocollin-1	DSC1	sp|Q08554|DSC1_HUMAN Desmocollin-1 OS=Homo sapiens OX=9606 GN=DSC1 PE=1 SV=2;sp|Q08554-2|DSC1-2_HUMAN Isoform of Q08554, Isoform 1B of Desmocollin-1 OS=Homo sapiens OX=9606 GN=DSC1 PE=1 SV=2	87929000000	2331000000	3767600000	19889000000	957930000	6681300000	2195800000	4162500000	1201300000	3486800000	4558700000	809590000	17694000000	2739500000	5939200000	6865600000	2520600000	4197500000	5011200000	13709000000	26871000000	14543000000	7713000000	84959000000	24057000000	1160700000	3366100000	12882000000	4455800000	2915100000	1219700000	427610000	1692900000	2348200000	4048100000	1685000000	2047900000	1466900000	2802100000	9081300000	1475400000	23461000000	39568000000	7333000000	4085800000
P02686-3;P02686;P02686-5;A8MZH3;J3QL64;E9PJ72;J3QKL5;J3QQK6;C9J6H1	19	Myelin basic protein	MBP	sp|P02686-3|MBP-3_HUMAN Isoform of P02686, Isoform 3 of Myelin basic protein OS=Homo sapiens OX=9606 GN=MBP PE=1 SV=3;sp|P02686|MBP_HUMAN Myelin basic protein OS=Homo sapiens OX=9606 GN=MBP PE=1 SV=3;sp|P02686-5|MBP-5_HUMAN Isoform of P02686, Isoform 5 of	8762000000	1918500000	5039600000	8447700000	4958100000	32030000000	1273600000	10146000000	2600100000	5656300000	3004200000	1139100000	10041000000	2261600000	9393000000	5763100000	11521000000	7173400000	5436700000	22607000000	6710100000	6665700000	8471400000	10534000000	4679500000	4856700000	16233000000	52744000000	4127200000	9163800000	6179400000	1449900000	4362800000	3232100000	4240700000	11327000000	4132100000	356380000	5107900000	6610900000	9172500000	11471000000	31792000000	22577000000	32720000000
P02675;D6REL8	2	Fibrinogen beta chain;Fibrinopeptide B;Fibrinogen beta chain	FGB	sp|P02675|FIBB_HUMAN Fibrinogen beta chain OS=Homo sapiens OX=9606 GN=FGB PE=1 SV=2;tr|D6REL8|D6REL8_HUMAN Isoform of P02675, Fibrinogen beta chain OS=Homo sapiens OX=9606 GN=FGB PE=1 SV=1	2911100000	5007500000	13498000000	4791800000	1433100000	14701000000	1414200000	3320000000	2033100000	1759900000	4960700000	3262500000	5391100000	1886000000	8404200000	31769000000	9879500000	2557500000	937960000	3476900000	744220000	1357700000	5942600000	15764000000	2015000000	4678500000	5056600000	7182400000	2256500000	12428000000	31154000000	5672100000	1968800000	14281000000	3275400000	5843400000	21739000000	3326600000	9019700000	9350200000	16410000000	1936900000	10687000000	14085000000	15052000000
F5H039	5	Molybdopterin molybdenumtransferase	GPHN	tr|F5H039|F5H039_HUMAN Isoform of Q9NQX3, Molybdopterin molybdenumtransferase OS=Homo sapiens OX=9606 GN=GPHN PE=1 SV=1	4322300000	2695800000	2368600000	5114900000	2740100000	8780100000	3607800000	5987600000	2503900000	4277200000	5520900000	1784900000	16428000000	1325100000	5777500000	2024200000	4768600000	1174200000	811610000	5908200000	2704500000	2559300000	3719000000	8692500000	8174100000	1874100000	13958000000	33123000000	2347700000	30856000000	54071000000	7046000000	1020800000	4123700000	2759400000	3286700000	32713000000	4755800000	14905000000	2645200000	28758000000	9547700000	32068000000	18227000000	6406400000
P30041	1	Peroxiredoxin-6	PRDX6	sp|P30041|PRDX6_HUMAN Peroxiredoxin-6 OS=Homo sapiens OX=9606 GN=PRDX6 PE=1 SV=3	6941500000	3724500000	3296100000	5061800000	1876400000	16408000000	4100700000	6543300000	3558500000	2177600000	2694100000	759580000	6442400000	1290900000	6387500000	11681000000	19748000000	5900900000	2306200000	13292000000	6488200000	6086100000	5729000000	16674000000	5801100000	3372000000	12310000000	51604000000	2405700000	21770000000	15341000000	1681900000	10374000000	5069800000	2599600000	3723200000	6885800000	51296000	9543500000	4294900000	6818900000	10298000000	33733000000	20557000000	21516000000
P31153	1	S-adenosylmethionine synthase isoform type-2	MAT2A	sp|P31153|METK2_HUMAN S-adenosylmethionine synthase isoform type-2 OS=Homo sapiens OX=9606 GN=MAT2A PE=1 SV=1	5106300000	6703100000	5636900000	5351500000	2589900000	14580000000	4448100000	10216000000	5068300000	6062600000	6673900000	1692400000	14417000000	2723100000	6552700000	9321200000	18588000000	3657000000	8466700000	8357300000	15446000000	6352600000	9938000000	9748400000	9487100000	1755900000	8247600000	18179000000	4241200000	15985000000	19602000000	3347000000	6316300000	7282900000	6224400000	4086600000	6794000000	1114800000	7550300000	7937700000	17090000000	3923800000	69985000000	10697000000	13795000000
Q02252;Q02252-2	3	Methylmalonate-semialdehyde dehydrogenase [acylating], mitochondrial	ALDH6A1	sp|Q02252|MMSA_HUMAN Methylmalonate-semialdehyde dehydrogenase [acylating], mitochondrial OS=Homo sapiens OX=9606 GN=ALDH6A1 PE=1 SV=2;sp|Q02252-2|MMSA-2_HUMAN Isoform of Q02252, Isoform 2 of Methylmalonate-semialdehyde dehydrogenase [acylating], mitochond	1483400000	10229000000	7213800000	2969000000	3145300000	7572700000	2345700000	8056700000	4382500000	5676300000	4021400000	927170000	12875000000	1234600000	11396000000	12966000000	13407000000	1243700000	1600300000	9871100000	535870000	15680000000	5524700000	9635200000	8527200000	2374000000	5394700000	21038000000	3210600000	9719200000	10005000000	1552100000	5802300000	11354000000	2016200000	2252200000	2358400000	304890000	2431200000	10236000000	10078000000	6726000000	20551000000	18491000000	10544000000
O14773;A0A2R8YD45;A0A2R8Y7U1;A0A2R8YGD1	8	Tripeptidyl-peptidase 1	TPP1	sp|O14773|TPP1_HUMAN Tripeptidyl-peptidase 1 OS=Homo sapiens OX=9606 GN=TPP1 PE=1 SV=2;tr|A0A2R8YD45|A0A2R8YD45_HUMAN Isoform of O14773, Tripeptidyl-peptidase 1 OS=Homo sapiens OX=9606 GN=TPP1 PE=1 SV=1;tr|A0A2R8Y7U1|A0A2R8Y7U1_HUMAN Isoform of O14773, Tri	3706300000	4559300000	9279000000	2382900000	2444000000	15907000000	3296400000	8070200000	3296400000	6138900000	5682300000	1511900000	8257900000	1536900000	19207000000	10416000000	10714000000	1349000000	1752900000	7873600000	2779200000	8250200000	5525800000	11664000000	8981500000	5428500000	11040000000	18794000000	2622400000	15551000000	26133000000	3188600000	6523500000	4526700000	2886700000	5505200000	25931000000	475000000	23305000000	4075000000	22657000000	7793000000	30491000000	16112000000	7353600000
O94986-2;O94986-1;O94986-3;O94986	6	Centrosomal protein of 152 kDa	CEP152	sp|O94986-2|CE152-2_HUMAN Isoform of O94986, Isoform 2 of Centrosomal protein of 152 kDa OS=Homo sapiens OX=9606 GN=CEP152 PE=1 SV=4;sp|O94986-1|CE152-1_HUMAN Isoform of O94986, Isoform 1 of Centrosomal protein of 152 kDa OS=Homo sapiens OX=9606 GN=CEP152	261490000	53517000	55114000	4648900	105180000	531470000000	6992600	310150000	53517000	124050000	25462000000	247730000	33258000	26688000	1529200000	178480000	203380000	199740000	651350000	41602000	12402000000	123980000	855560000	921920000	16261000000	280890000	75653000	336920000	294350000	140780000	375860000	6795200	442880000	676460000	6106000	67520000	211650000	7723600	86379000000	40173000	100630000	514170000	815250000	1050800000	412960000
H3BQK9;H3BPE1	5	Microtubule-actin cross-linking factor 1, isoforms 1/2/3/5	MACF1	tr|H3BQK9|H3BQK9_HUMAN Isoform of Q9UPN3, Microtubule-actin cross-linking factor 1, isoforms 1/2/3/5 OS=Homo sapiens OX=9606 GN=MACF1 PE=1 SV=1;tr|H3BPE1|H3BPE1_HUMAN Isoform of Q9UPN3, Microtubule-actin cross-linking factor 1, isoforms 1/2/3/5 OS=Homo sap	9629600000	2267000000	3243100000	1309000000	1650400000	18719000000	535700000	11550000000	3793400000	8863700000	6969000000	1406500000	5116300000	1217100000	22346000000	13586000000	20030000000	2392600000	1652500000	17283000000	6206600000	12422000000	7476600000	40798000000	12569000000	4613600000	13643000000	22669000000	5412100000	10161000000	8346600000	3068000000	7838400000	3706200000	2812700000	2671500000	4106800000	2730100000	5386500000	3373200000	4908700000	21733000000	20991000000	24530000000	8971400000
P27348;E9PG15	2	14-3-3 protein theta	YWHAQ	sp|P27348|1433T_HUMAN 14-3-3 protein theta OS=Homo sapiens OX=9606 GN=YWHAQ PE=1 SV=1;tr|E9PG15|E9PG15_HUMAN Isoform of P27348, 14-3-3 protein theta (Fragment) OS=Homo sapiens OX=9606 GN=YWHAQ PE=1 SV=1	8853500000	10638000000	11164000000	6546800000	3817300000	11522000000	1042100000	26580000000	8051600000	12153000000	5887900000	2015200000	12507000000	2940200000	8642300000	17239000000	24534000000	7809300000	5655200000	15316000000	8854100000	9430600000	12548000000	12196000000	14163000000	2899700000	13539000000	17771000000	7697900000	914090000	7756200000	539620000	12309000000	5155900000	6286500000	2959600000	1871300000	135830000	4950500000	9907500000	6738000000	21256000000	16062000000	3229100000	30555000000
O43488;H3BLU7	4	Aflatoxin B1 aldehyde reductase member 2	AKR7A2	sp|O43488|ARK72_HUMAN Aflatoxin B1 aldehyde reductase member 2 OS=Homo sapiens OX=9606 GN=AKR7A2 PE=1 SV=3;tr|H3BLU7|H3BLU7_HUMAN Isoform of O43488, Aflatoxin B1 aldehyde reductase member 2 (Fragment) OS=Homo sapiens OX=9606 GN=AKR7A2 PE=1 SV=1	9350000000	8180200000	7218700000	6010700000	1929200000	17579000000	4178900000	9710500000	5959000000	7928200000	3237200000	1453200000	14594000000	1786100000	5327700000	5955300000	21801000000	3597100000	3040700000	7180300000	3505300000	4270800000	2158200000	7863300000	6281100000	4459900000	11196000000	23187000000	2557200000	18730000000	32678000000	3719300000	15660000000	7729400000	6299400000	8646800000	10648000000	267030000	10316000000	6824700000	29162000000	2330600000	24234000000	19805000000	10664000000
Q5T749	1	Keratinocyte proline-rich protein	KPRP	sp|Q5T749|KPRP_HUMAN Keratinocyte proline-rich protein OS=Homo sapiens OX=9606 GN=KPRP PE=1 SV=1	21025000000	2374300000	5010100000	7254300000	1500300000	9162900000	957570000	3257200000	2078400000	3033600000	2472400000	1108600000	12330000000	2417900000	8684600000	19591000000	6902100000	11554000000	2991400000	14442000000	11827000000	5568000000	14049000000	59434000000	30432000000	1908800000	7687600000	13015000000	6266500000	2411000000	2179800000	664450000	2227200000	1485800000	2175700000	1284000000	2147900000	4105400000	6512000000	9905400000	2043500000	43152000000	25859000000	15573000000	10400000000
Q13618;Q13618-2;Q13618-3	7	Cullin-3	CUL3	sp|Q13618|CUL3_HUMAN Cullin-3 OS=Homo sapiens OX=9606 GN=CUL3 PE=1 SV=2;sp|Q13618-2|CUL3-2_HUMAN Isoform of Q13618, Isoform 2 of Cullin-3 OS=Homo sapiens OX=9606 GN=CUL3 PE=1 SV=2;sp|Q13618-3|CUL3-3_HUMAN Isoform of Q13618, Isoform 3 of Cullin-3 OS=Homo sa	10291000000	6646000000	4937000000	10304000000	2913600000	18984000000	1466500000	11441000000	5945300000	5461300000	5466800000	2911700000	27505000000	2860400000	6394600000	21200000000	17267000000	1194600000	2219400000	7939100000	3776800000	6894500000	7295800000	17449000000	8061500000	4280000000	13739000000	22807000000	5323900000	10404000000	14169000000	2967200000	5312600000	10417000000	3284500000	3816000000	10667000000	10518000000	9136900000	6095500000	9815500000	18278000000	42999000000	21759000000	6746300000
E7ESC6	3	Exportin-7	XPO7	tr|E7ESC6|E7ESC6_HUMAN Isoform of Q9UIA9, Exportin-7 OS=Homo sapiens OX=9606 GN=XPO7 PE=1 SV=1	2598700000	5022100000	5411400000	4197500000	4257700000	6346200000	333130000	8798900000	5796400000	9996100000	9321400000	5858400000	10839000000	2327800000	8985700000	25381000000	19731000000	1150800000	1339300000	19559000000	2918100000	13608000000	12835000000	38937000000	11639000000	2738000000	13604000000	16046000000	10268000000	5495200000	8469700000	2030300000	6158200000	5865400000	4331100000	2378500000	11646000000	2794400000	12614000000	4633100000	9342800000	23260000000	19545000000	17233000000	7374300000
A0A1B0GW68;Q13510-2;Q13510;A0A1B0GUH5;A0A1B0GTZ5;A0A1B0GTM3;A0A1B0GUA4;E7EMM4;A0A1B0GUG1;A0A1B0GUE3;A0A1B0GUW4;A0A1B0GTP7;Q13510-3;A0A1B0GVG2;A0A1B0GUB3;A0A1B0GV06	26	Acid ceramidase;Acid ceramidase subunit alpha;Acid ceramidase subunit beta	ASAH1	tr|A0A1B0GW68|A0A1B0GW68_HUMAN Isoform of Q13510, Acid ceramidase OS=Homo sapiens OX=9606 GN=ASAH1 PE=1 SV=1;sp|Q13510-2|ASAH1-2_HUMAN Isoform of Q13510, Isoform 2 of Acid ceramidase OS=Homo sapiens OX=9606 GN=ASAH1 PE=1 SV=5;sp|Q13510|ASAH1_HUMAN Acid cer	2135200000	2898000000	3511700000	4016100000	2062200000	13100000000	11761000000	4000400000	2497400000	3499900000	3972800000	1690300000	7581900000	1550900000	5770600000	5197100000	19216000000	2220000000	2329000000	6512800000	3068600000	3948500000	2531600000	6323300000	3832200000	8807400000	13840000000	27209000000	1404300000	55059000000	37290000000	5040700000	7608300000	3753300000	3368100000	5846800000	17550000000	279380000	8855200000	4225800000	30341000000	4121200000	27324000000	23015000000	6600700000
P50502;Q3KNR6;H7C3I1;Q8IZP2;F6VDH7	6	Hsc70-interacting protein;Putative protein FAM10A4	ST13	sp|P50502|F10A1_HUMAN Hsc70-interacting protein OS=Homo sapiens OX=9606 GN=ST13 PE=1 SV=2;tr|Q3KNR6|Q3KNR6_HUMAN Isoform of P50502, Hsc70-interacting protein OS=Homo sapiens OX=9606 GN=ST13 PE=1 SV=1;tr|H7C3I1|H7C3I1_HUMAN Isoform of P50502, Hsc70-interact	2520000000	5887900000	3821800000	4155000000	2705200000	12840000000	7712500000	4423800000	2250100000	4295600000	6008200000	1138100000	19660000000	2212200000	6573500000	11523000000	16136000000	2517600000	6200100000	8051400000	5201400000	4943500000	5048000000	14937000000	7381800000	4607200000	12497000000	29226000000	3557200000	13620000000	20362000000	2521300000	5251700000	4427600000	4169100000	4149700000	7596900000	587580000	6781300000	3093700000	14955000000	5623200000	36167000000	14525000000	6212900000
P02671;P02671-2	3	Fibrinogen alpha chain;Fibrinopeptide A;Fibrinogen alpha chain	FGA	sp|P02671|FIBA_HUMAN Fibrinogen alpha chain OS=Homo sapiens OX=9606 GN=FGA PE=1 SV=2;sp|P02671-2|FIBA-2_HUMAN Isoform of P02671, Isoform 2 of Fibrinogen alpha chain OS=Homo sapiens OX=9606 GN=FGA PE=1 SV=2	1747900000	4626200000	3727200000	4909700000	1222300000	8080000000	2038300000	3088400000	1273800000	600370000	5288500000	1759000000	4593800000	1866700000	4696600000	26114000000	7772900000	3406200000	561710000	3095200000	766900000	2526100000	3781400000	17757000000	2680400000	3515500000	3706900000	16672000000	2061200000	8643300000	16983000000	4594200000	1174400000	10649000000	2421600000	4735500000	22429000000	4265100000	7698200000	11245000000	11969000000	1859000000	12987000000	17629000000	12788000000
O95782-2;O95782	2	AP-2 complex subunit alpha-1	AP2A1	sp|O95782-2|AP2A1-2_HUMAN Isoform of O95782, Isoform B of AP-2 complex subunit alpha-1 OS=Homo sapiens OX=9606 GN=AP2A1 PE=1 SV=3;sp|O95782|AP2A1_HUMAN AP-2 complex subunit alpha-1 OS=Homo sapiens OX=9606 GN=AP2A1 PE=1 SV=3	3622000000	5897700000	5882200000	5124700000	2626700000	7113300000	1495700000	11566000000	5247200000	10885000000	4452900000	3050100000	11802000000	1418400000	15409000000	14738000000	13080000000	1220700000	1772500000	9941600000	3285600000	12226000000	12069000000	27012000000	15217000000	2022300000	14016000000	22766000000	8766700000	19389000000	15547000000	2360200000	3547600000	4981500000	4016200000	2973400000	12203000000	2817900000	15240000000	5443800000	12271000000	17998000000	21420000000	17462000000	8419600000
M0R116;P13637;P13637-2;P13637-3;A0A2R8YEY8;A0A0A0MT26	7	Sodium/potassium-transporting ATPase subunit alpha-3	ATP1A3	tr|M0R116|M0R116_HUMAN Isoform of P13637, Sodium/potassium-transporting ATPase subunit alpha OS=Homo sapiens OX=9606 GN=ATP1A3 PE=1 SV=1;sp|P13637|AT1A3_HUMAN Sodium/potassium-transporting ATPase subunit alpha-3 OS=Homo sapiens OX=9606 GN=ATP1A3 PE=1 SV=3;	331810000	1720600000	852010000	2183400000	1831600000	12445000000	5998200000	5723600000	1240200000	4985300000	4548200000	1077700000	3605600000	398170000	3175900000	9530400000	9917100000	438760000	226670000	8316200000	5483400000	5845000000	2904700000	11631000000	3388500000	5218700000	10638000000	86225000000	2834000000	43147000000	27139000000	5256900000	2908700000	3616100000	1809600000	4882200000	33096000000	6968500000	7902900000	1686500000	13032000000	8205700000	19405000000	30576000000	2516100000
P30626-3;P30626-2	2	Sorcin	SRI	sp|P30626-3|SORCN-3_HUMAN Isoform of P30626, Isoform 3 of Sorcin OS=Homo sapiens OX=9606 GN=SRI PE=1 SV=1;sp|P30626-2|SORCN-2_HUMAN Isoform of P30626, Isoform 2 of Sorcin OS=Homo sapiens OX=9606 GN=SRI PE=1 SV=1	7352900000	2967800000	2268300000	4309500000	1946500000	8368500000	12453000000	5169300000	2417300000	3025500000	2430400000	665240000	10168000000	1434100000	3729500000	8409000000	19518000000	4820200000	1904200000	5449700000	4682700000	7203800000	5847400000	17056000000	6809100000	2228200000	5222300000	27265000000	4755600000	25433000000	28069000000	2701000000	4118000000	3751200000	2731700000	3049000000	12047000000	66426000	12908000000	3687400000	14295000000	8855800000	29633000000	23403000000	9004900000
Q12765;Q12765-2;Q12765-3;C9K052	6	Secernin-1	SCRN1	sp|Q12765|SCRN1_HUMAN Secernin-1 OS=Homo sapiens OX=9606 GN=SCRN1 PE=1 SV=2;sp|Q12765-2|SCRN1-2_HUMAN Isoform of Q12765, Isoform 2 of Secernin-1 OS=Homo sapiens OX=9606 GN=SCRN1 PE=1 SV=2;sp|Q12765-3|SCRN1-3_HUMAN Isoform of Q12765, Isoform 3 of Secernin-1	4834600000	12219000000	10226000000	7025500000	1520200000	10782000000	1082400000	11907000000	7909800000	5842100000	3936200000	1446500000	19837000000	1371600000	6974500000	7564600000	35504000000	5827100000	7966600000	6021400000	1451600000	5910800000	4979700000	33637000000	19698000000	845070000	5543600000	5760100000	8246000000	1851700000	7852500000	525700000	14373000000	7435000000	4162700000	2102100000	1424100000	470460000	3643700000	11599000000	9505500000	3420600000	11539000000	3435300000	37693000000
A0A0A0MRA8;Q9Y2J2-4	12	Band 4.1-like protein 3;Band 4.1-like protein 3, N-terminally processed	EPB41L3	tr|A0A0A0MRA8|A0A0A0MRA8_HUMAN Isoform of Q9Y2J2, Band 4.1-like protein 3 OS=Homo sapiens OX=9606 GN=EPB41L3 PE=1 SV=1;sp|Q9Y2J2-4|E41L3-4_HUMAN Isoform of Q9Y2J2, Isoform 4 of Band 4.1-like protein 3 OS=Homo sapiens OX=9606 GN=EPB41L3 PE=1 SV=2	2741500000	8580100000	7863000000	3656600000	4582100000	3837800000	200100000	9686900000	6612500000	17958000000	7887800000	3273000000	12205000000	1980000000	20253000000	37375000000	12408000000	1100900000	2642500000	9894300000	2287400000	16492000000	28489000000	41475000000	28252000000	1519700000	11167000000	9763400000	14168000000	103060000	1573400000	364630000	4693000000	5576400000	4163700000	563380000	1108400000	1238900000	3651500000	6129300000	2141100000	21902000000	10101000000	3604000000	14758000000
O94964-2;O94964;H0YDM2;O94964-4	5	Protein SOGA1;N-terminal form;C-terminal 80 kDa form	SOGA1	sp|O94964-2|SOGA1-2_HUMAN Isoform of O94964, Isoform 2 of Protein SOGA1 OS=Homo sapiens OX=9606 GN=SOGA1 PE=1 SV=2;sp|O94964|SOGA1_HUMAN Protein SOGA1 OS=Homo sapiens OX=9606 GN=SOGA1 PE=1 SV=2;tr|H0YDM2|H0YDM2_HUMAN Isoform of O94964, Protein SOGA1 (Fragm	7413900000	426330000	109310000	2142100000	150600000	28677000000	19496000	487630000	11256000000	1051700000	231780000	88617000	927950000	427530000	4968200000	5864700000	105370000000	13632000000	527820000	1732800000	115450000	9096300000	17941000000	11666000000	2312900000	348770000	13049000000	21150000000	286770000	11343000000	649040000	6008900000	489580000	3274500000	238130000	1430400000	1140900000	61915000	2977400000	1112100000	3575500000	117000000	4263600000	960780000	4010400000
P21283	1	V-type proton ATPase subunit C 1	ATP6V1C1	sp|P21283|VATC1_HUMAN V-type proton ATPase subunit C 1 OS=Homo sapiens OX=9606 GN=ATP6V1C1 PE=1 SV=4	4770200000	6205000000	5499600000	4705000000	3071200000	7352700000	2331200000	6584200000	5806900000	7888900000	6784400000	1467200000	16361000000	1860100000	7480800000	12112000000	28065000000	4600400000	5414900000	10312000000	3077900000	10224000000	6244400000	15347000000	12340000000	611720000	15136000000	27643000000	5144200000	19819000000	23363000000	3173200000	5399900000	5932800000	7566300000	7649900000	4937200000	180210000	9264400000	8381900000	18633000000	5762400000	23456000000	17272000000	5823700000
Q01469	2	Fatty acid-binding protein, epidermal	FABP5	sp|Q01469|FABP5_HUMAN Fatty acid-binding protein 5 OS=Homo sapiens OX=9606 GN=FABP5 PE=1 SV=3	78447000000	1321700000	1492000000	13686000000	939040000	1663800000	1561400000	4067300000	377780000	1316400000	1950800000	1323000000	24774000000	1479000000	3233100000	3408000000	1152100000	958330000	2612300000	39137000000	47502000000	20409000000	3693300000	97496000000	10342000000	99193000	656890000	4407700000	2051100000	456820000	381200000	161920000	520640000	117570000	1492500000	1718300000	1300300000	97883000	926540000	6046300000	218320000	19594000000	53870000000	7698600000	1942000000
Q12860;Q12860-2	8	Contactin-1	CNTN1	sp|Q12860|CNTN1_HUMAN Contactin-1 OS=Homo sapiens OX=9606 GN=CNTN1 PE=1 SV=1;sp|Q12860-2|CNTN1-2_HUMAN Isoform of Q12860, Isoform 2 of Contactin-1 OS=Homo sapiens OX=9606 GN=CNTN1 PE=1 SV=1	1150400000	1941700000	1644500000	4524700000	1376900000	3437500000	1776300000	4849200000	4011200000	4179800000	4623700000	1931200000	7298800000	907550000	5138200000	7990300000	13999000000	747780000	898520000	11569000000	1317600000	7447300000	2463100000	8146600000	2948200000	2052800000	9504900000	26861000000	2343900000	48406000000	17496000000	3814300000	831080000	3581400000	1963500000	2752300000	19931000000	2996000000	8101900000	4815300000	16244000000	8132700000	16983000000	73179000000	2993100000
Q8WXX0	2	Dynein heavy chain 7, axonemal	DNAH7	sp|Q8WXX0|DYH7_HUMAN Dynein heavy chain 7, axonemal OS=Homo sapiens OX=9606 GN=DNAH7 PE=1 SV=2	230610000	4478300000	332720000	3856500000	3683900000	5724700000	3480900000	4901500000	730290000	447620000	5464900000	1435800000	11622000000	4008800000	3369500000	18720000000	11848000000	1917300000	3281000000	2589500000	3670000000	11691000000	14730000000	13454000000	30871000000	37635000	12360000000	1475700000	2699800000	20300000000	14885000000	3351500000	10033000000	4562500000	3437200000	4068000000	6347700000	355910000	37265000000	1268700000	10827000000	21901000000	28118000000	14901000000	1474300000
Q14697-2;E9PKU7	3	Neutral alpha-glucosidase AB	GANAB	sp|Q14697-2|GANAB-2_HUMAN Isoform of Q14697, Isoform 2 of Neutral alpha-glucosidase AB OS=Homo sapiens OX=9606 GN=GANAB PE=1 SV=3;tr|E9PKU7|E9PKU7_HUMAN Isoform of Q14697, Neutral alpha-glucosidase AB OS=Homo sapiens OX=9606 GN=GANAB PE=1 SV=1	4892000000	5428900000	3992800000	5855900000	2283200000	6457400000	32756000	9581800000	3624300000	5662100000	8570400000	2632000000	9955500000	1564000000	10588000000	24308000000	40424000000	2837000000	2417600000	12795000000	4006300000	9469300000	6094300000	26687000000	10775000000	5144400000	8311800000	20464000000	4851000000	1465700000	6975400000	1007600000	11546000000	8349500000	3686600000	1812400000	11238000000	3219300000	8513800000	4667400000	5716300000	12495000000	11458000000	9888100000	7121700000
P20073-2;P20073	2	Annexin A7	ANXA7	sp|P20073-2|ANXA7-2_HUMAN Isoform of P20073, Isoform 2 of Annexin A7 OS=Homo sapiens OX=9606 GN=ANXA7 PE=1 SV=3;sp|P20073|ANXA7_HUMAN Annexin A7 OS=Homo sapiens OX=9606 GN=ANXA7 PE=1 SV=3	7062900000	4411500000	7637600000	1943900000	2642400000	20324000000	1965900000	8700300000	3061600000	8232000000	4055000000	2043900000	15509000000	2068500000	7630000000	11646000000	23251000000	1617300000	3646300000	6110900000	4677100000	9978800000	6628800000	21243000000	10143000000	5147000000	9306800000	23235000000	3545200000	12365000000	29170000000	3334900000	7320100000	2892300000	3954100000	8505900000	8611900000	911440000	16490000000	7166500000	30460000000	6078300000	23273000000	22907000000	5616800000
Q92890;Q92890-1;Q92890-3	6	Ubiquitin fusion degradation protein 1 homolog	UFD1L	sp|Q92890|UFD1_HUMAN Ubiquitin recognition factor in ER-associated degradation protein 1 OS=Homo sapiens OX=9606 GN=UFD1 PE=1 SV=3;sp|Q92890-1|UFD1-1_HUMAN Isoform of Q92890, Isoform Long of Ubiquitin recognition factor in ER-associated degradation protein	4965300000	4251600000	1081900000	5595400000	2776100000	38383000000	5385200000	5531200000	1133400000	3404600000	1404800000	1012800000	2945300000	2006100000	2274700000	9013500000	21040000000	2046400000	3164600000	1945400000	441760000	1103800000	9041600000	10290000000	10188000000	296180000	14526000000	49545000000	4144000000	2445600000	18928000000	2706900000	809240000	5411800000	806700000	1606200000	13839000000	11265000	2465100000	1546500000	4339100000	10079000000	41255000000	6811000000	18753000000
Q9NPH2-2	1	Inositol-3-phosphate synthase 1	ISYNA1	sp|Q9NPH2-2|INO1-2_HUMAN Isoform of Q9NPH2, Isoform 2 of Inositol-3-phosphate synthase 1 OS=Homo sapiens OX=9606 GN=ISYNA1 PE=1 SV=1	1448300000	3743500000	4276700000	2756700000	962350000	10503000000	5384800000	4055000000	2120300000	3016800000	3732100000	1691200000	13367000000	1187200000	8063000000	4687400000	9541500000	2016900000	960350000	5703300000	1665800000	2759200000	2691500000	9229900000	5219800000	4370200000	8877300000	22663000000	1870100000	25604000000	27730000000	3053900000	10397000000	7181300000	2950200000	3571500000	15005000000	3853100000	13763000000	3580400000	15082000000	4134800000	33259000000	14996000000	5172800000
Q14195-2	1	Isoform LCRMP-4 of Dihydropyrimidinase-related protein 3	DPYSL3	sp|Q14195-2|DPYL3-2_HUMAN Isoform of Q14195, Isoform LCRMP-4 of Dihydropyrimidinase-related protein 3 OS=Homo sapiens OX=9606 GN=DPYSL3 PE=1 SV=1	4554700000	5027700000	5046600000	3714700000	1436800000	14976000000	2708000000	3276700000	3619500000	3399800000	2404400000	2165100000	16257000000	1864500000	2767800000	7346000000	26337000000	4746400000	4127100000	6371000000	2901700000	7753900000	2986500000	13879000000	9762700000	4259200000	8755700000	20233000000	3923100000	31893000000	16263000000	1409100000	24639000000	9443900000	3844500000	4293100000	5291100000	2979200000	4038000000	7659500000	12992000000	5888300000	28378000000	15160000000	9670200000
P08559;P08559-2;P08559-3	7	Pyruvate dehydrogenase E1 component subunit alpha, somatic form, mitochondrial	PDHA1	sp|P08559|ODPA_HUMAN Pyruvate dehydrogenase E1 component subunit alpha, somatic form, mitochondrial OS=Homo sapiens OX=9606 GN=PDHA1 PE=1 SV=3;sp|P08559-2|ODPA-2_HUMAN Isoform of P08559, Isoform 2 of Pyruvate dehydrogenase E1 component subunit alpha, somat	23514000000	19193000000	2155300000	6929700000	1639900000	7575600000	11449000000	38850000000	4093500000	2003200000	3144600000	791430000	14834000000	600640000	10492000000	21118000000	35890000000	2523500000	3245700000	9430300000	6202400000	5341600000	1171900000	9813600000	6992400000	2381300000	9399800000	9677600000	2346500000	3273500000	8351900000	2138400000	4685800000	8118900000	20779000000	2766100000	27537000000	1224000000	6922800000	11707000000	12710000000	2728300000	13152000000	3500400000	6326000000
Q7Z4W1;J3KS22;J3QS36	3	L-xylulose reductase	DCXR	sp|Q7Z4W1|DCXR_HUMAN L-xylulose reductase OS=Homo sapiens OX=9606 GN=DCXR PE=1 SV=2;tr|J3KS22|J3KS22_HUMAN Isoform of Q7Z4W1, L-xylulose reductase (Fragment) OS=Homo sapiens OX=9606 GN=DCXR PE=1 SV=8;tr|J3QS36|J3QS36_HUMAN Isoform of Q7Z4W1, L-xylulose red	2478700000	3233500000	2109500000	4437000000	1501100000	22447000000	15866000000	7862600000	2436200000	2191500000	4243200000	746270000	8934500000	927230000	5271800000	7331600000	18191000000	3859200000	1403000000	6936500000	1819100000	3052700000	5471800000	5731100000	5175200000	2926400000	10995000000	21560000000	2686300000	22579000000	28510000000	3807100000	3821600000	4228600000	2521900000	4876200000	14651000000	151710000	11712000000	2531000000	18088000000	6040000000	25575000000	23620000000	8922100000
P09211;A8MX94	4	Glutathione S-transferase P	GSTP1	sp|P09211|GSTP1_HUMAN Glutathione S-transferase P OS=Homo sapiens OX=9606 GN=GSTP1 PE=1 SV=2;tr|A8MX94|A8MX94_HUMAN Isoform of P09211, Glutathione S-transferase P OS=Homo sapiens OX=9606 GN=GSTP1 PE=1 SV=1	13124000000	4161100000	5114500000	5079200000	967050000	9587400000	4868900000	7086900000	3208900000	1860100000	3650200000	950250000	12454000000	1212400000	2254800000	5500400000	10638000000	3582200000	1573400000	7877800000	6705900000	1172100000	2512400000	20567000000	5354500000	830230000	4374500000	14585000000	1168300000	33662000000	32935000000	2605400000	8709700000	3443300000	3317400000	5899400000	7684600000	85357000	9036800000	6184600000	15780000000	8346700000	27288000000	11068000000	6934500000
P62873;P62873-2;F6UT28;B3KVK2	6	Guanine nucleotide-binding protein G(I)/G(S)/G(T) subunit beta-1	GNB1	sp|P62873|GBB1_HUMAN Guanine nucleotide-binding protein G(I)/G(S)/G(T) subunit beta-1 OS=Homo sapiens OX=9606 GN=GNB1 PE=1 SV=3;sp|P62873-2|GBB1-2_HUMAN Isoform of P62873, Isoform 2 of Guanine nucleotide-binding protein G(I)/G(S)/G(T) subunit beta-1 OS=Hom	835770000	3486800000	3342900000	1552500000	1522600000	4166400000	11837000000	6286000000	2712200000	8005700000	5489100000	992350000	10637000000	281330000	15642000000	15935000000	16487000000	619710000	657550000	6321700000	2676300000	11405000000	3903000000	15006000000	12799000000	4034300000	10741000000	46324000000	3000100000	7449000000	31154000000	2798000000	4143000000	3586400000	2176100000	916520000	23923000000	40620000	13474000000	2303900000	17944000000	5495100000	12493000000	8173300000	6604300000
P09622;E9PEX6;P09622-3;P09622-2	8	Dihydrolipoyl dehydrogenase, mitochondrial;Dihydrolipoyl dehydrogenase	DLD	sp|P09622|DLDH_HUMAN Dihydrolipoyl dehydrogenase, mitochondrial OS=Homo sapiens OX=9606 GN=DLD PE=1 SV=2;tr|E9PEX6|E9PEX6_HUMAN Isoform of P09622, Dihydrolipoyl dehydrogenase OS=Homo sapiens OX=9606 GN=DLD PE=1 SV=1;sp|P09622-3|DLDH-3_HUMAN Isoform of P096	2145900000	6250300000	3913000000	3340900000	2512900000	17074000000	8210000000	5401600000	4916500000	5793400000	7079200000	1027200000	22423000000	1522600000	9839100000	17438000000	29110000000	2506900000	4868900000	6761700000	3423100000	7697300000	9134000000	14924000000	8002700000	2445100000	9881100000	28146000000	6363000000	13651000000	23900000000	4990400000	3713400000	6965000000	3029200000	2846800000	6729000000	1439000000	11429000000	4451900000	14825000000	5249400000	24321000000	9507700000	13658000000
O60282;A0A0G2JMZ6;O60282-2	4	Kinesin heavy chain isoform 5C	KIF5C	sp|O60282|KIF5C_HUMAN Kinesin heavy chain isoform 5C OS=Homo sapiens OX=9606 GN=KIF5C PE=1 SV=1;tr|A0A0G2JMZ6|A0A0G2JMZ6_HUMAN Isoform of O60282, Kinesin-like protein (Fragment) OS=Homo sapiens OX=9606 GN=KIF5C PE=1 SV=1;sp|O60282-2|KIF5C-2_HUMAN Isoform o	17471000000	3846400000	4135600000	2093100000	2685000000	9800300000	39089000	7223700000	5239600000	14367000000	2393000000	2727000000	7732800000	2460200000	9133100000	11545000000	24616000000	3725000000	3610500000	15741000000	3289900000	8108100000	14437000000	19626000000	10046000000	1619700000	6716100000	11469000000	9338300000	1405500000	2801600000	571370000	7059200000	2165100000	4561800000	3214900000	1732600000	4901300000	4882300000	2865100000	3048200000	27354000000	17338000000	8682300000	7711500000
P49748-3;P49748	5	Very long-chain specific acyl-CoA dehydrogenase, mitochondrial	ACADVL	sp|P49748-3|ACADV-3_HUMAN Isoform of P49748, Isoform 3 of Very long-chain specific acyl-CoA dehydrogenase, mitochondrial OS=Homo sapiens OX=9606 GN=ACADVL PE=1 SV=1;sp|P49748|ACADV_HUMAN Very long-chain specific acyl-CoA dehydrogenase, mitochondrial OS=Hom	18593000000	1540800000	1234200000	2785300000	1435700000	39904000000	1036200000	3788400000	1138200000	2060300000	2543400000	542130000	9503600000	935970000	4677600000	6274700000	7329600000	3677500000	3382800000	6383100000	2244000000	4225900000	1863000000	8912500000	2545700000	5490200000	6809500000	20460000000	1048500000	26401000000	25238000000	3172000000	6866600000	3008100000	4301400000	7322800000	7196200000	8238000000	6026600000	3205100000	18756000000	6225700000	41503000000	10396000000	11652000000
P35080-2;G5E9Q6;C9J0J7	3	Profilin-2;Profilin	PFN2	sp|P35080-2|PROF2-2_HUMAN Isoform of P35080, Isoform IIb of Profilin-2 OS=Homo sapiens OX=9606 GN=PFN2 PE=1 SV=3;tr|G5E9Q6|G5E9Q6_HUMAN Isoform of P35080, Profilin OS=Homo sapiens OX=9606 GN=PFN2 PE=1 SV=1;tr|C9J0J7|C9J0J7_HUMAN Isoform of P35080, Profilin	3973800000	4669400000	3886600000	8903400000	3307600000	10201000000	5529600000	9318400000	4711600000	7614800000	6329700000	1741600000	15420000000	1779100000	4261300000	6937700000	6986000000	4933100000	2343900000	10172000000	5782400000	5226400000	8544200000	11183000000	7887000000	1275100000	16706000000	20438000000	4520400000	15679000000	13248000000	4154700000	5196400000	6403300000	5198500000	5048000000	12401000000	88608000	11987000000	3560200000	17288000000	948020000	18834000000	20159000000	12704000000
P46940;A0A0J9YXZ5;H0YLE8	6	Ras GTPase-activating-like protein IQGAP1	IQGAP1	sp|P46940|IQGA1_HUMAN Ras GTPase-activating-like protein IQGAP1 OS=Homo sapiens OX=9606 GN=IQGAP1 PE=1 SV=1;tr|A0A0J9YXZ5|A0A0J9YXZ5_HUMAN Isoform of P46940, Ras GTPase-activating-like protein IQGAP1 OS=Homo sapiens OX=9606 GN=IQGAP1 PE=1 SV=1;tr|H0YLE8|H0	5608700000	5145500000	3901000000	3826800000	1340200000	12256000000	455270000	8135600000	3342600000	2768800000	6065300000	1183300000	9138400000	1199600000	8087500000	7027000000	6711100000	1026000000	1146600000	9842600000	4803600000	3115500000	1986600000	37721000000	3748000000	8414300000	8783400000	14130000000	906150000	14388000000	12896000000	3476100000	14680000000	4969800000	3606600000	3332400000	17085000000	4371000000	16600000000	2870100000	14510000000	11850000000	32600000000	13695000000	3818000000
P31948;P31948-2;P31948-3	5	Stress-induced-phosphoprotein 1	STIP1	sp|P31948|STIP1_HUMAN Stress-induced-phosphoprotein 1 OS=Homo sapiens OX=9606 GN=STIP1 PE=1 SV=1;sp|P31948-2|STIP1-2_HUMAN Isoform of P31948, Isoform 2 of Stress-induced-phosphoprotein 1 OS=Homo sapiens OX=9606 GN=STIP1 PE=1 SV=1;sp|P31948-3|STIP1-3_HUMAN	2468500000	6465000000	3597300000	8488800000	2676700000	10029000000	2238000000	8066100000	2941400000	4870400000	5117300000	2536300000	14226000000	1136900000	3090900000	7419900000	7342300000	1722300000	4649100000	3995900000	2588000000	1716000000	5312600000	8707200000	5686300000	1683600000	8762000000	20107000000	2473800000	9261300000	19853000000	2519100000	4561400000	5337500000	3352200000	6561100000	13666000000	14125000000	11426000000	3683100000	13572000000	9735200000	33053000000	10098000000	9576800000
Q92945;A0A087WTP3;M0R0I5	10	Far upstream element-binding protein 2	KHSRP	sp|Q92945|FUBP2_HUMAN Far upstream element-binding protein 2 OS=Homo sapiens OX=9606 GN=KHSRP PE=1 SV=4;tr|A0A087WTP3|A0A087WTP3_HUMAN Isoform of Q92945, Far upstream element-binding protein 2 OS=Homo sapiens OX=9606 GN=KHSRP PE=1 SV=1;tr|M0R0I5|M0R0I5_HUM	4157500000	4380600000	3950600000	9737000000	2699900000	5662600000	1465000000	8546200000	3632900000	8151100000	8878700000	4322500000	15231000000	1850000000	2738500000	3716600000	13787000000	657170000	1876000000	6046000000	2589500000	2261200000	5051000000	8705800000	3198900000	4514700000	11377000000	22912000000	1558400000	10495000000	19999000000	3435800000	7227600000	4629400000	4894400000	6769700000	20050000000	9659400000	13753000000	4128000000	25384000000	10778000000	49611000000	6721800000	3849500000
Q5T5C7;P49591	2	Serine--tRNA ligase, cytoplasmic	SARS	tr|Q5T5C7|Q5T5C7_HUMAN Isoform of P49591, Serine--tRNA ligase, cytoplasmic OS=Homo sapiens OX=9606 GN=SARS PE=1 SV=1;sp|P49591|SYSC_HUMAN Serine--tRNA ligase, cytoplasmic OS=Homo sapiens OX=9606 GN=SARS PE=1 SV=3	2994300000	2210200000	1733500000	1346100000	498690000	7165200000	6843100000	19171000000	2835200000	2246200000	4160700000	1355700000	12902000000	682480000	4181800000	6123300000	9520200000	839700000	749670000	3811100000	1414400000	4040200000	1606000000	7090000000	3844800000	1744300000	4197100000	32605000000	832200000	20891000000	45470000000	8653500000	3722700000	4457400000	982470000	2271400000	23130000000	2994200000	16130000000	1643100000	28001000000	3127000000	30738000000	13563000000	4246600000
E7EUC7;A0A087WYS1;Q16851;Q16851-2	16	UTP--glucose-1-phosphate uridylyltransferase	UGP2	tr|E7EUC7|E7EUC7_HUMAN Isoform of Q16851, UTP--glucose-1-phosphate uridylyltransferase OS=Homo sapiens OX=9606 GN=UGP2 PE=1 SV=1;tr|A0A087WYS1|A0A087WYS1_HUMAN Isoform of Q16851, UTP--glucose-1-phosphate uridylyltransferase OS=Homo sapiens OX=9606 GN=UGP2	463510000	2999500000	2708900000	1540100000	8650000000	2297400000	841580000	4812600000	2499600000	48402000000	21572000000	4261500000	4422800000	1772300000	93416000000	2431600000	11991000000	1209600000	1577100000	2126800000	381130000	1392900000	1105000000	4614100000	3340200000	167940000	65913000000	1269900000	1178000000	4014900000	3629500000	866120000	7309000000	6181400000	532070000	179820000	569420000	34528000	1375900000	11846000000	53989000000	33643000000	6714400000	8800100000	5626600000
P63208;E5RJR5;E7ERH2;F8W8N3;P63208-2;E5RGM3	8	S-phase kinase-associated protein 1	SKP1	sp|P63208|SKP1_HUMAN S-phase kinase-associated protein 1 OS=Homo sapiens OX=9606 GN=SKP1 PE=1 SV=2;tr|E5RJR5|E5RJR5_HUMAN Isoform of P63208, S-phase kinase-associated protein 1 OS=Homo sapiens OX=9606 GN=SKP1 PE=1 SV=1;tr|E7ERH2|E7ERH2_HUMAN Isoform of P63	2240200000	2786000000	2726600000	5205000000	2649300000	11397000000	5085400000	6241500000	2208000000	4215100000	4480700000	1270000000	8525500000	1333900000	5929600000	8039100000	8110000000	3093800000	1520200000	9727800000	5957900000	3388300000	6073100000	10291000000	6511500000	2615700000	12535000000	31662000000	2918900000	11587000000	16092000000	1656000000	6689800000	3552600000	2789700000	4864200000	7791900000	102990000	19607000000	3970600000	15501000000	8790500000	31555000000	14535000000	11253000000
Q9NZL9;Q9NZL9-2;Q9NZL9-4;Q9NZL9-3	7	Methionine adenosyltransferase 2 subunit beta	MAT2B	sp|Q9NZL9|MAT2B_HUMAN Methionine adenosyltransferase 2 subunit beta OS=Homo sapiens OX=9606 GN=MAT2B PE=1 SV=1;sp|Q9NZL9-2|MAT2B-2_HUMAN Isoform of Q9NZL9, Isoform 2 of Methionine adenosyltransferase 2 subunit beta OS=Homo sapiens OX=9606 GN=MAT2B PE=1 SV=	4407600000	6058400000	5022000000	3964100000	2222100000	9061400000	2815100000	7721700000	3834500000	4351000000	4657100000	962860000	18366000000	1731700000	5857400000	4929000000	14202000000	4130700000	3042700000	8873800000	15159000000	3762600000	3297200000	42810000000	11658000000	1158700000	6393200000	14491000000	2566400000	10307000000	17180000000	3084000000	5517800000	4426800000	5239900000	3099200000	5619300000	403380000	5956200000	5115200000	10721000000	6225400000	60185000000	9140400000	12771000000
Q13564-4	1	NEDD8-activating enzyme E1 regulatory subunit	NAE1	sp|Q13564-4|ULA1-4_HUMAN Isoform of Q13564, Isoform 4 of NEDD8-activating enzyme E1 regulatory subunit OS=Homo sapiens OX=9606 GN=NAE1 PE=1 SV=1	2288900000	7060300000	6170800000	3529600000	1802900000	15972000000	3283900000	7475500000	5597800000	6978900000	4528200000	1956500000	13472000000	2343800000	6383300000	4071900000	15322000000	1275400000	2367800000	6790600000	2629600000	3908700000	3567400000	15092000000	9875600000	1954000000	6848500000	24942000000	2373800000	19834000000	23387000000	3990400000	8906000000	4901600000	5177500000	4194700000	6368100000	2312100000	11448000000	4013600000	19592000000	5210500000	32509000000	18752000000	8466000000
Q92734-2;Q92734;Q92734-4;Q92734-3;C9JJP5;C9JUE0;C9JTY3	7	Protein TFG	TFG	sp|Q92734-2|TFG-2_HUMAN Isoform of Q92734, Isoform 2 of Protein TFG OS=Homo sapiens OX=9606 GN=TFG PE=1 SV=2;sp|Q92734|TFG_HUMAN Protein TFG OS=Homo sapiens OX=9606 GN=TFG PE=1 SV=2;sp|Q92734-4|TFG-4_HUMAN Isoform of Q92734, Isoform 4 of Protein TFG OS=Hom	1712900000	3077900000	3462500000	4633000000	2620300000	10781000000	7405500000	5055100000	2397000000	7344700000	8481000000	1647900000	13074000000	1344800000	4071000000	5106700000	15289000000	2047600000	2683600000	5468500000	3189700000	1704400000	4891700000	6252200000	6968200000	1381600000	10902000000	30948000000	2123800000	13108000000	20104000000	5397700000	3836100000	4706700000	3444800000	4708400000	15395000000	3036100000	11950000000	3558800000	26624000000	5780400000	37625000000	12217000000	6673700000
Q13363-2;Q13363;D6RAX2;E7ESU7;E7EPF8;E9PGB1	10	C-terminal-binding protein 1	CTBP1	sp|Q13363-2|CTBP1-2_HUMAN Isoform of Q13363, Isoform 2 of C-terminal-binding protein 1 OS=Homo sapiens OX=9606 GN=CTBP1 PE=1 SV=2;sp|Q13363|CTBP1_HUMAN C-terminal-binding protein 1 OS=Homo sapiens OX=9606 GN=CTBP1 PE=1 SV=2;tr|D6RAX2|D6RAX2_HUMAN Isoform o	1940500000	6006100000	5027200000	4133600000	2544500000	4955200000	6964300000	7426100000	6525900000	5625900000	8130600000	1768200000	21851000000	1699100000	7795000000	10475000000	41405000000	1811300000	1951700000	7497100000	1198500000	7695500000	6301200000	10020000000	9190000000	849040000	8808200000	18977000000	4335400000	5736500000	21631000000	4205800000	2987800000	5863400000	2848100000	1675400000	7894900000	476330000	10294000000	4454500000	15315000000	6141200000	22985000000	10857000000	9522700000
Q14203;Q14203-6;Q14203-2	3	Dynactin subunit 1	DCTN1	sp|Q14203|DCTN1_HUMAN Dynactin subunit 1 OS=Homo sapiens OX=9606 GN=DCTN1 PE=1 SV=3;sp|Q14203-6|DCTN1-6_HUMAN Isoform of Q14203, Isoform 6 of Dynactin subunit 1 OS=Homo sapiens OX=9606 GN=DCTN1 PE=1 SV=3;sp|Q14203-2|DCTN1-2_HUMAN Isoform of Q14203, Isoform	40396000000	1628200000	6650600000	782210000	1964600000	1561200000	196240000	16087000000	2969200000	21781000000	4331800000	4515200000	2683700000	1094100000	22242000000	15061000000	11145000000	77012000	185830000	12999000000	1559800000	6922900000	21266000000	17491000000	16326000000	4847100000	19801000000	18864000000	9448900000	4829100000	3487400000	556360000	6512100000	2248500000	3993300000	242080000	2466700000	687690000	11345000000	3094300000	2273000000	64406000000	4451700000	6783900000	3761700000
A6NFX8;Q9UKK9;A6NJU6;A6NCQ0	5	ADP-sugar pyrophosphatase	NUDT5	tr|A6NFX8|A6NFX8_HUMAN Isoform of Q9UKK9, ADP-sugar pyrophosphatase OS=Homo sapiens OX=9606 GN=NUDT5 PE=1 SV=1;sp|Q9UKK9|NUDT5_HUMAN ADP-sugar pyrophosphatase OS=Homo sapiens OX=9606 GN=NUDT5 PE=1 SV=1;tr|A6NJU6|A6NJU6_HUMAN Isoform of Q9UKK9, ADP-sugar py	3426000000	4568100000	3558400000	2590800000	1819900000	23366000000	7416900000	5165600000	2771300000	3111200000	1696500000	883960000	7905900000	1608800000	9740200000	5944600000	12152000000	4455900000	2396700000	12454000000	2609100000	1991400000	2749000000	7538500000	8123100000	11589000000	6497800000	33568000000	2314000000	25153000000	25214000000	1558700000	13191000000	4654800000	2162000000	3370600000	4280100000	141630000	5219500000	2206400000	7609000000	3469200000	26003000000	9467600000	14352000000
Q8IVF2;Q8IVF2-3	3	Protein AHNAK2	AHNAK2	sp|Q8IVF2|AHNK2_HUMAN Protein AHNAK2 OS=Homo sapiens OX=9606 GN=AHNAK2 PE=1 SV=2;sp|Q8IVF2-3|AHNK2-3_HUMAN Isoform of Q8IVF2, Isoform 3 of Protein AHNAK2 OS=Homo sapiens OX=9606 GN=AHNAK2 PE=1 SV=2	2805700000	7286900000	2724600000	490970000	2130800000	7078000000	341240000	4195900000	2528900000	4399300000	5313800000	1331500000	1777200000	1446200000	9195400000	2101300000	12650000000	406280000	433270000	8553700000	3436400000	6069900000	5450200000	12467000000	8788300000	518130000	9816600000	17866000000	1900400000	6337300000	10892000000	1990500000	4634200000	4323100000	5261000000	2696200000	4493100000	252910000	5535500000	4015600000	8786000000	5308800000	16142000000	2320500000	1269000000
Q9BYR9;P0C7H8	2	Keratin-associated protein 2-4;Keratin-associated protein 2-3	KRTAP2-4	sp|Q9BYR9|KRA24_HUMAN Keratin-associated protein 2-4 OS=Homo sapiens OX=9606 GN=KRTAP2-4 PE=1 SV=1;sp|P0C7H8|KRA23_HUMAN Keratin-associated protein 2-3 OS=Homo sapiens OX=9606 GN=KRTAP2-3 PE=1 SV=2	3087000000	13755000000	35249000	1031900000	6898200	102060000000	50030000	2271400000	463280000	760280000	2687700000	427780000	1154900000	0	309330000	18488000000	44040000000	2418200000	13288000000	76384000	9787800	11535000000	2506000000	39289000000	4067500000	327630000	388400000	0	18347000000	2553700000	764880000	1145100000	317390000	207300000	2995700000	865520000	562450000	140090000	27336000000	1698700000	1237900000	10278000000	8224800000	1987000000	0
Q9HA64;I3L139;I3L3W5	7	Ketosamine-3-kinase	FN3KRP	sp|Q9HA64|KT3K_HUMAN Ketosamine-3-kinase OS=Homo sapiens OX=9606 GN=FN3KRP PE=1 SV=2;tr|I3L139|I3L139_HUMAN Isoform of Q9HA64, Ketosamine-3-kinase OS=Homo sapiens OX=9606 GN=FN3KRP PE=1 SV=1;tr|I3L3W5|I3L3W5_HUMAN Isoform of Q9HA64, Ketosamine-3-kinase (Fr	2610600000	3422800000	2716200000	2766400000	1917500000	15849000000	4240800000	5338900000	2329700000	2549700000	2191000000	782840000	6642600000	928240000	5423300000	2983300000	9784800000	948410000	1029800000	4800800000	1405000000	876490000	2738400000	4238100000	15065000000	2205900000	5264200000	21605000000	1737700000	27474000000	28933000000	7106100000	4695800000	5285700000	2077400000	5513900000	14622000000	94196000	7513700000	2056600000	26896000000	1349500000	23192000000	11597000000	6320600000
P07237	1	Protein disulfide-isomerase	P4HB	sp|P07237|PDIA1_HUMAN Protein disulfide-isomerase OS=Homo sapiens OX=9606 GN=P4HB PE=1 SV=3	2277100000	4257100000	2531800000	3624500000	1849800000	13916000000	4335400000	9559600000	2398100000	3572300000	7334600000	819240000	9990500000	1095100000	8100400000	12297000000	65789000000	3670800000	4037900000	6163100000	4024400000	8131000000	3235100000	18221000000	4875500000	3705300000	5531800000	22792000000	5359200000	8357900000	14982000000	1191600000	16015000000	6092500000	3160600000	2025000000	10397000000	1051400000	5980000000	3176300000	10381000000	2799800000	18456000000	7687200000	7014600000
P49902;P49902-2	7	Cytosolic purine 5-nucleotidase	NT5C2	sp|P49902|5NTC_HUMAN Cytosolic purine 5-nucleotidase OS=Homo sapiens OX=9606 GN=NT5C2 PE=1 SV=1;sp|P49902-2|5NTC-2_HUMAN Isoform of P49902, Isoform 2 of Cytosolic purine 5-nucleotidase OS=Homo sapiens OX=9606 GN=NT5C2 PE=1 SV=1	1187300000	1443600000	2362200000	3396800000	1319700000	14124000000	5515800000	2729300000	1261500000	1406900000	1832500000	2562400000	5286900000	1927600000	22427000000	8840200000	8894400000	6875800000	796710000	15539000000	2371900000	1929600000	1815800000	39100000000	10813000000	2287900000	3608700000	9151800000	644240000	19792000000	20134000000	3427200000	6085700000	3300600000	1111200000	2431200000	6950100000	733580000	8396600000	1949400000	12913000000	126330000000	31970000000	7011800000	6402000000
Q96JE9;Q96JE9-3	3	Microtubule-associated protein 6	MAP6	sp|Q96JE9|MAP6_HUMAN Microtubule-associated protein 6 OS=Homo sapiens OX=9606 GN=MAP6 PE=1 SV=2;sp|Q96JE9-3|MAP6-3_HUMAN Isoform of Q96JE9, Isoform 3 of Microtubule-associated protein 6 OS=Homo sapiens OX=9606 GN=MAP6 PE=1 SV=2	2448400000	4543700000	5879800000	6910100000	5792100000	8246200000	238720000	13009000000	4760900000	17461000000	6680500000	3686000000	16770000000	1855900000	13327000000	11687000000	2231400000	788450000	1388500000	8427000000	3390100000	636170000	15902000000	8550600000	8000200000	1305700000	10617000000	22867000000	4217500000	2283800000	9452500000	4415600000	3092900000	2978600000	5281500000	3595800000	11091000000	4735000000	23774000000	3474800000	11576000000	15609000000	25610000000	8020700000	7714900000
O43242;O43242-2	3	26S proteasome non-ATPase regulatory subunit 3	PSMD3	sp|O43242|PSMD3_HUMAN 26S proteasome non-ATPase regulatory subunit 3 OS=Homo sapiens OX=9606 GN=PSMD3 PE=1 SV=2;sp|O43242-2|PSMD3-2_HUMAN Isoform of O43242, Isoform 2 of 26S proteasome non-ATPase regulatory subunit 3 OS=Homo sapiens OX=9606 GN=PSMD3 PE=1 S	1839900000	2810200000	3024200000	1390100000	1110900000	28951000000	116540000	2939400000	1917400000	8548400000	2612800000	797220000	6364800000	966900000	4750400000	6532500000	13761000000	1416100000	26708000000	3354200000	2801200000	3862900000	7929600000	269800000000	3842600000	4088200000	3996400000	30747000000	3449200000	908570000	1959600000	104600000	2863700000	2342000000	1931300000	1456600000	1128900000	881860000	1943600000	2161500000	1119400000	2566600000	16868000000	4499000000	4262600000
Q9ULU8;Q9ULU8-4	2	Calcium-dependent secretion activator 1	CADPS	sp|Q9ULU8|CAPS1_HUMAN Calcium-dependent secretion activator 1 OS=Homo sapiens OX=9606 GN=CADPS PE=1 SV=3;sp|Q9ULU8-4|CAPS1-4_HUMAN Isoform of Q9ULU8, Isoform 4 of Calcium-dependent secretion activator 1 OS=Homo sapiens OX=9606 GN=CADPS PE=1 SV=3	2688900000	8414800000	7179700000	2064800000	3549200000	3922500000	15507000	13329000000	13594000000	27601000000	4811000000	5458000000	9593200000	1704700000	21025000000	34740000000	10785000000	4180200000	1974700000	13426000000	1984100000	18343000000	32784000000	30432000000	14140000000	703900000	7339600000	3316100000	9532200000	293720000	1538100000	121030000	1896100000	1917700000	4613800000	403360000	1769700000	684820000	8622600000	3323000000	1081900000	42905000000	6642000000	998390000	12683000000
A0A494C165;P12955;K7ES25;P12955-3;P12955-2;A0A494C194	8	Xaa-Pro dipeptidase	PEPD	tr|A0A494C165|A0A494C165_HUMAN Isoform of P12955, Xaa-Pro dipeptidase (Fragment) OS=Homo sapiens OX=9606 GN=PEPD PE=4 SV=1;sp|P12955|PEPD_HUMAN Xaa-Pro dipeptidase OS=Homo sapiens OX=9606 GN=PEPD PE=1 SV=3;tr|K7ES25|K7ES25_HUMAN Isoform of P12955, Xaa-Pro	2297900000	5181200000	5444200000	4665100000	2430700000	22650000000	2460800000	5884700000	4242700000	4158000000	5374700000	1027400000	12102000000	1699600000	6680500000	6544300000	8387300000	3634900000	4581400000	5291600000	2568200000	3391800000	5836300000	9831400000	7558200000	2579200000	9789500000	16820000000	3274700000	14869000000	20360000000	3177500000	6112100000	6591400000	3108000000	3390300000	5633600000	1074600000	9279700000	5918400000	14649000000	5470800000	27072000000	9570600000	14756000000
P27361;E9PQW4;P27361-2;P27361-3;E9PJF0;E9PBK7;B3KR49	9	Mitogen-activated protein kinase 3;Mitogen-activated protein kinase	MAPK3	sp|P27361|MK03_HUMAN Mitogen-activated protein kinase 3 OS=Homo sapiens OX=9606 GN=MAPK3 PE=1 SV=4;tr|E9PQW4|E9PQW4_HUMAN Isoform of P27361, Mitogen-activated protein kinase OS=Homo sapiens OX=9606 GN=MAPK3 PE=1 SV=1;sp|P27361-2|MK03-2_HUMAN Isoform of P27	3011700000	4414600000	5645500000	2142900000	1972500000	5136200000	4513800000	4455000000	4051000000	5204000000	6462200000	2369200000	5578300000	1520800000	10136000000	5753200000	4202400000	2097600000	2114800000	10371000000	2373600000	5918700000	5044500000	9203100000	8889200000	3568400000	10807000000	14293000000	3710900000	4521900000	14074000000	1587800000	8438100000	3128100000	5100400000	2203800000	6693500000	301550000	5912700000	6012200000	16793000000	2833100000	27498000000	11545000000	6830100000
O00499;O00499-3;O00499-6;O00499-2;O00499-9;O00499-7;O00499-4	7	Myc box-dependent-interacting protein 1	BIN1	sp|O00499|BIN1_HUMAN Myc box-dependent-interacting protein 1 OS=Homo sapiens OX=9606 GN=BIN1 PE=1 SV=1;sp|O00499-3|BIN1-3_HUMAN Isoform of O00499, Isoform IIC1 of Myc box-dependent-interacting protein 1 OS=Homo sapiens OX=9606 GN=BIN1 PE=1 SV=1;sp|O00499-6	5158600000	6348600000	6163000000	7360000000	5208400000	4645200000	140140000	9259400000	5271700000	11855000000	7024500000	2237900000	17842000000	1804500000	6655700000	16079000000	2312700000	1853400000	8797800000	6453600000	2456600000	2282900000	12509000000	14929000000	12530000000	472090000	10368000000	22782000000	7589200000	7898100000	7883100000	1336200000	2503000000	5405100000	4452600000	2003800000	6489500000	4346600000	9773100000	7411600000	14262000000	13626000000	22131000000	5517200000	8556800000
O00429-6	1	Dynamin-1-like protein	DNM1L	sp|O00429-6|DNM1L-6_HUMAN Isoform of O00429, Isoform 6 of Dynamin-1-like protein OS=Homo sapiens OX=9606 GN=DNM1L PE=1 SV=2	5550000000	13907000000	10100000000	11095000000	5589600000	12393000000	133320000	16179000000	14298000000	14411000000	8421400000	3290800000	44307000000	2305200000	9661700000	22049000000	5310000000	2116100000	5283500000	5549700000	3625600000	8658200000	10226000000	21740000000	13046000000	627060000	7506000000	4945900000	4212000000	1152200000	1816300000	252890000	6488600000	8581000000	5081300000	551010000	1080400000	1123700000	5290000000	11667000000	1381700000	18303000000	10313000000	2462400000	13161000000
Q9NVA2-2;D6RGI3;D6RER5;Q9NVA2;D6RDU5	9	Septin-11	SEPTIN11	sp|Q9NVA2-2|SEP11-2_HUMAN Isoform of Q9NVA2, Isoform 2 of Septin-11 OS=Homo sapiens OX=9606 GN=SEPT11 PE=1 SV=3;tr|D6RGI3|D6RGI3_HUMAN Isoform of Q9NVA2, Septin 11 OS=Homo sapiens OX=9606 GN=SEPTIN11 PE=1 SV=1;tr|D6RER5|D6RER5_HUMAN Isoform of Q9NVA2, Sept	1053100000	4230500000	5174100000	1435100000	1764000000	2865100000	1613300000	27946000000	3526800000	7162300000	4944100000	1347800000	12045000000	694270000	13179000000	12443000000	17365000000	1399600000	2928000000	5808500000	1014500000	7504900000	5809300000	16915000000	20010000000	1816600000	10698000000	20468000000	8735900000	7319600000	21668000000	1190900000	8412800000	6842000000	1696700000	1114900000	6127700000	153390000	10111000000	5519400000	13631000000	6966600000	17284000000	7479600000	11684000000
A0A2R8Y840;Q9HCK8;Q9HCK8-2;H0YJG4	7	Chromodomain-helicase-DNA-binding protein 8	CHD8	tr|A0A2R8Y840|A0A2R8Y840_HUMAN Isoform of Q9HCK8, Chromodomain-helicase-DNA-binding protein 8 (Fragment) OS=Homo sapiens OX=9606 GN=CHD8 PE=1 SV=1;sp|Q9HCK8|CHD8_HUMAN Chromodomain-helicase-DNA-binding protein 8 OS=Homo sapiens OX=9606 GN=CHD8 PE=1 SV=5;sp	0	3083600	17474000000	43584000	0	120010000000	40249000	131640000	256840000	1873500	28272000	56206000	95470000	10915000	112180000	84734000	60273000	738810000	8294900	103980000	5954200	193700000	102980000	329660000	500990000	2763500	50966000	185790000000	196080000	3227100	23146000	45007000	45257000	205710000	9183000	13640000	111810000	2553500	34773000	22405000	66775000	60822000	97460000	275670000	57604000
Q13098-7;C9JFE4;Q13098-5;Q13098-6	4	COP9 signalosome complex subunit 1	GPS1	sp|Q13098-7|CSN1-7_HUMAN Isoform of Q13098, Isoform 2 of COP9 signalosome complex subunit 1 OS=Homo sapiens OX=9606 GN=GPS1 PE=1 SV=4;tr|C9JFE4|C9JFE4_HUMAN Isoform of Q13098, COP9 signalosome complex subunit 1 OS=Homo sapiens OX=9606 GN=GPS1 PE=1 SV=2;sp|	3837400000	4396100000	5247600000	2787000000	2844200000	9084800000	935810000	6318700000	3751700000	8414800000	6213500000	2085600000	7720800000	1687600000	8808100000	7543400000	13204000000	2006700000	1968500000	8910400000	4036300000	6640700000	7881700000	10133000000	9492900000	4650500000	12675000000	16645000000	5422800000	4928700000	9582200000	2376500000	7835800000	5144400000	4437000000	3187100000	6372700000	1088200000	53755000000	4659700000	12876000000	7493400000	15164000000	7685800000	8184700000
P05089;P05089-3	2	Arginase-1	ARG1	sp|P05089|ARGI1_HUMAN Arginase-1 OS=Homo sapiens OX=9606 GN=ARG1 PE=1 SV=2;sp|P05089-3|ARGI1-3_HUMAN Isoform of P05089, Isoform 3 of Arginase-1 OS=Homo sapiens OX=9606 GN=ARG1 PE=1 SV=2	26449000000	1156100000	3460100000	6830700000	319550000	2449900000	499600000	7299900000	1190200000	1691500000	2654100000	493070000	11085000000	1267900000	6972700000	3304500000	1380800000	1945100000	1180200000	3379900000	15392000000	5512400000	2012600000	42204000000	11703000000	423170000	1179600000	4380100000	1533200000	8103400000	12244000000	230610000	8459500000	1368300000	2757400000	658410000	2472300000	724800000	6540200000	4486400000	766780000	15890000000	39882000000	3325600000	2027000000
Q96QK1	4	Vacuolar protein sorting-associated protein 35	VPS35	sp|Q96QK1|VPS35_HUMAN Vacuolar protein sorting-associated protein 35 OS=Homo sapiens OX=9606 GN=VPS35 PE=1 SV=2	1452700000	5981100000	5923500000	7704000000	2806400000	11950000000	24348000	8684900000	3981500000	12020000000	4222500000	2623000000	13792000000	3169800000	10854000000	17886000000	5910000000	2267200000	2971900000	9515700000	1132400000	10448000000	6728700000	17641000000	28535000000	1754400000	7324400000	8555200000	12405000000	1406200000	864160000	45544000	3383500000	4138200000	2163000000	626880000	1686400000	617520000	4799600000	5314300000	1454100000	46431000000	8638300000	8726200000	5163200000
P13591;A0A087WX77;A0A087WWD4;A0A087WV75;P13591-5;P13591-6	7	Neural cell adhesion molecule 1	NCAM1	sp|P13591|NCAM1_HUMAN Neural cell adhesion molecule 1 OS=Homo sapiens OX=9606 GN=NCAM1 PE=1 SV=3;tr|A0A087WX77|A0A087WX77_HUMAN Isoform of P13591, Neural cell adhesion molecule 1 OS=Homo sapiens OX=9606 GN=NCAM1 PE=1 SV=1;tr|A0A087WWD4|A0A087WWD4_HUMAN Iso	3655600000	1613600000	2026400000	2422700000	728790000	7628700000	528660000	3008900000	1780100000	3014900000	2689000000	1098000000	4062100000	866000000	2510500000	6166200000	9261300000	1941200000	1164700000	7235000000	2335900000	3292800000	806590000	7704800000	2528000000	3124400000	7478800000	27655000000	1591200000	38213000000	14123000000	4348600000	5920800000	2308800000	2931900000	6092500000	15189000000	3942400000	4971100000	2846200000	19966000000	6072900000	29553000000	31808000000	3172300000
P48681	1	Nestin	NES	sp|P48681|NEST_HUMAN Nestin OS=Homo sapiens OX=9606 GN=NES PE=1 SV=2	619000000	45495000	212290000	274890000	324970000	332830000	216160000	2570300000	135250000	4370300000	3472800000	2584900000	141460000	164660000	23984000000	271940000	1119600000	292010000	123350000	17806000000	15727000000	411620000	281410000	1715400000	13428000000	8197000000	14776000000	3130900000	276790000	14909000000	33552000000	220590000	30953000000	2732100000	320270000	238110000	5221500000	43588000	14760000000	809090000	21473000000	1105900000	2844200000	6627600000	679190000
P00338;P00338-3;P00338-4;P00338-5;P00338-2;F5GXY2	15	L-lactate dehydrogenase A chain	LDHA	sp|P00338|LDHA_HUMAN L-lactate dehydrogenase A chain OS=Homo sapiens OX=9606 GN=LDHA PE=1 SV=2;sp|P00338-3|LDHA-3_HUMAN Isoform of P00338, Isoform 3 of L-lactate dehydrogenase A chain OS=Homo sapiens OX=9606 GN=LDHA PE=1 SV=2;sp|P00338-4|LDHA-4_HUMAN Isofo	11652000000	3623600000	2657500000	1683700000	1982200000	10736000000	1413200000	5018900000	3034100000	2545400000	2416400000	711670000	9483800000	1883000000	5819000000	5143200000	24047000000	2217800000	987400000	6787600000	6816300000	1992500000	3732600000	22011000000	20082000000	1262800000	4795100000	19459000000	2560400000	5564700000	10398000000	1215700000	5320100000	2768400000	1957400000	1487900000	3507600000	105490000	3902800000	2586700000	6670100000	6776300000	19497000000	10024000000	7579900000
H3BNU1;Q9ULP9-2;Q9ULP9;H3BV07;A0A2R8Y518;A0A0D9SFR5;H3BQ06	7	TBC1 domain family member 24	TBC1D24	tr|H3BNU1|H3BNU1_HUMAN Isoform of Q9ULP9, TBC1 domain family member 24 OS=Homo sapiens OX=9606 GN=TBC1D24 PE=1 SV=2;sp|Q9ULP9-2|TBC24-2_HUMAN Isoform of Q9ULP9, Isoform 2 of TBC1 domain family member 24 OS=Homo sapiens OX=9606 GN=TBC1D24 PE=1 SV=2;sp|Q9ULP	5290000000	4202000000	2911700000	32016000000	1386100000	12144000000	723080000	3698400000	5668500000	1105100000	14581000000	1791600000	30123000000	3098200000	17836000000	12578000000	10199000000	165820000	734730000	4849100000	1752700000	5613000000	12887000000	11746000000	7575800000	1188400000	11022000000	11837000000	1503900000	4070500000	8945000000	767310000	1656100000	6626800000	1909900000	434310000	1690000000	3077600000	5218700000	3190100000	7003200000	46216000000	17778000000	16491000000	1627300000
P61201;P61201-2;B4DIH5;H0YKU5	6	COP9 signalosome complex subunit 2	COPS2	sp|P61201|CSN2_HUMAN COP9 signalosome complex subunit 2 OS=Homo sapiens OX=9606 GN=COPS2 PE=1 SV=1;sp|P61201-2|CSN2-2_HUMAN Isoform of P61201, Isoform 2 of COP9 signalosome complex subunit 2 OS=Homo sapiens OX=9606 GN=COPS2 PE=1 SV=1;tr|B4DIH5|B4DIH5_HUMAN	4809100000	5037000000	6103400000	3211600000	3771900000	6910900000	718920000	5644000000	3862400000	8211500000	6261600000	2000500000	8817900000	2069400000	10874000000	11391000000	14311000000	1594000000	3571700000	11227000000	2109800000	7090800000	8974400000	13260000000	10706000000	1684100000	12382000000	13460000000	6260600000	2005600000	9428300000	2652000000	6212700000	5607900000	4595800000	2557200000	8803000000	545500000	9551700000	5589300000	14951000000	7793400000	18407000000	6822300000	11350000000
Q9UN36-2;Q9UN36-6;Q9UN36-5;Q9UN36-4;A0A0A0MS87;G3V4S9;G3V5H8;G3V5G0;G3V392;G3V5B7	24	Protein NDRG2	NDRG2	sp|Q9UN36-2|NDRG2-2_HUMAN Isoform of Q9UN36, Isoform 2 of Protein NDRG2 OS=Homo sapiens OX=9606 GN=NDRG2 PE=1 SV=2;sp|Q9UN36-6|NDRG2-6_HUMAN Isoform of Q9UN36, Isoform 6 of Protein NDRG2 OS=Homo sapiens OX=9606 GN=NDRG2 PE=1 SV=2;sp|Q9UN36-5|NDRG2-5_HUMAN	4068700000	7151500000	4665100000	3679600000	2474600000	13600000000	14391000000	7259500000	3481400000	4882500000	5929600000	802340000	24305000000	1551500000	5149200000	6409400000	29989000000	3157900000	3762900000	4122700000	4814100000	5410300000	3836600000	6762300000	6120300000	7127500000	7873700000	30011000000	2447900000	18414000000	22076000000	1354800000	8537500000	2570600000	1926500000	3764500000	2981100000	417520000	6855900000	4343200000	14055000000	2572700000	21308000000	12377000000	5710700000
Q9UJ70-2;Q9UJ70;H7C3G9;C9JEV6;H7C286	12	N-acetyl-D-glucosamine kinase	NAGK	sp|Q9UJ70-2|NAGK-2_HUMAN Isoform of Q9UJ70, Isoform 2 of N-acetyl-D-glucosamine kinase OS=Homo sapiens OX=9606 GN=NAGK PE=1 SV=4;sp|Q9UJ70|NAGK_HUMAN N-acetyl-D-glucosamine kinase OS=Homo sapiens OX=9606 GN=NAGK PE=1 SV=4;tr|H7C3G9|H7C3G9_HUMAN Isoform of	5030800000	3849100000	4264700000	2553400000	2092700000	12518000000	2069100000	5303400000	2668500000	5281400000	3591800000	1176000000	10267000000	1689900000	10046000000	7115800000	14038000000	2676500000	1899600000	8553100000	2512400000	5321500000	4240800000	16333000000	9172700000	2599700000	9105000000	14339000000	3825400000	6926500000	13744000000	1577100000	9151900000	3593800000	4746700000	2265800000	7089800000	162500000	11495000000	4033300000	15021000000	5159300000	30991000000	9226300000	7317300000
A0A1W2PNV4;E9PF58	3	Isoform of Q92747, Actin-related protein 2/3 complex subunit 1A	ARPC1A	tr|A0A1W2PNV4|A0A1W2PNV4_HUMAN Uncharacterized protein OS=Homo sapiens OX=9606 PE=4 SV=1;tr|E9PF58|E9PF58_HUMAN Isoform of Q92747, Actin-related protein 2/3 complex subunit 1A OS=Homo sapiens OX=9606 GN=ARPC1A PE=1 SV=1	2176700000	4525000000	3419600000	2695500000	1575700000	2926900000	2745200000	4522200000	3154400000	5289200000	4274700000	959380000	14089000000	1088200000	7163000000	7165800000	15033000000	1760300000	1476700000	7355300000	2384000000	7563300000	4185000000	13221000000	9372900000	1884300000	15498000000	23068000000	4174500000	10068000000	18866000000	3446300000	4843800000	4299800000	2712900000	1952400000	8595500000	100270000	6333800000	3420700000	14928000000	3362300000	17062000000	14169000000	10235000000
Q9H853	1	Putative tubulin-like protein alpha-4B	TUBA4B	sp|Q9H853|TBA4B_HUMAN Putative tubulin-like protein alpha-4B OS=Homo sapiens OX=9606 GN=TUBA4B PE=5 SV=2	2603300000	6705500000	4374600000	590220000	4009900000	3789200000	41942000	8335300000	1069800000	18478000000	23952000000	3811200000	9469800000	1657100000	1463000000	23472000000	1849000000	131290000	695310000	1292700000	81885000	1317000000	5204200000	1502200000	9972400000	2464300000	12057000000	43879000000	899460000	1224800000	17208000000	2210500000	7887600000	4444800000	8998500000	498760000	26479000000	655080000	27679000000	11132000000	25307000000	31253000000	3312500000	5496800000	1761000000
J3KR44;Q96FW1;F5H6Q1;F5GYN4;F5GYJ8	5	Ubiquitin thioesterase OTUB1	OTUB1	tr|J3KR44|J3KR44_HUMAN Isoform of Q96FW1, Ubiquitin thioesterase OS=Homo sapiens OX=9606 GN=OTUB1 PE=1 SV=2;sp|Q96FW1|OTUB1_HUMAN Ubiquitin thioesterase OTUB1 OS=Homo sapiens OX=9606 GN=OTUB1 PE=1 SV=2;tr|F5H6Q1|F5H6Q1_HUMAN Isoform of Q96FW1, Ubiquitin th	10607000000	9271500000	8629900000	4107300000	4780000000	11484000000	30031000	10331000000	8535400000	16744000000	5412800000	2336900000	10974000000	2755800000	15063000000	16121000000	9454400000	10514000000	8919300000	13786000000	5380800000	6833900000	12396000000	21757000000	14305000000	1169600000	12709000000	7102300000	13719000000	40292000	1308300000	152140000	5039700000	2598800000	7245300000	913750000	295880000	47913000	2874100000	6598900000	1311400000	11056000000	7945300000	1447400000	21255000000
P13611;P13611-5;P13611-2	4	Versican core protein	VCAN	sp|P13611|CSPG2_HUMAN Versican core protein OS=Homo sapiens OX=9606 GN=VCAN PE=1 SV=3;sp|P13611-5|CSPG2-5_HUMAN Isoform of P13611, Isoform Vint of Versican core protein OS=Homo sapiens OX=9606 GN=VCAN PE=1 SV=3;sp|P13611-2|CSPG2-2_HUMAN Isoform of P13611,	2373500000	1589400000	3062200000	1463500000	1644200000	22039000000	1773000000	2397000000	2016000000	1244700000	1171400000	394230000	2464900000	1531500000	3191200000	3375200000	19312000000	1346700000	2233900000	17152000000	1973200000	6530200000	1871800000	5443400000	3440300000	1505500000	10919000000	29673000000	3047500000	20372000000	7202800000	2563300000	2549800000	4085700000	4247600000	7022000000	1834600000	2675300000	1424100000	4750900000	7458300000	3785800000	49564000000	33499000000	8624700000
Q9UBV8	1	Peflin	PEF1	sp|Q9UBV8|PEF1_HUMAN Peflin OS=Homo sapiens OX=9606 GN=PEF1 PE=1 SV=1	2794600000	10825000000	1042700000	3293900000	30493000	399400000000	968160000	2813700000	235460000	612890000	240910000	1357900000	1175100000	147010000	941410000	522830000	6013500000	206400000	744040000	429230000	2666100000	471670000	1012100000	1787900000	1060400000	222740000	6250700000	1968100000	290700000	4595700000	4768800000	3228700000	517540000	355060000	508330000	446330000	1666500000	12118000	3591700000	987150000	1655800000	2917100000	4123700000	2747600000	722140000
B1ALA9;P60891;A0A2R8Y7H4	5	Ribose-phosphate pyrophosphokinase 1	PRPS1	tr|B1ALA9|B1ALA9_HUMAN Isoform of P60891, Ribose-phosphate pyrophosphokinase 1 OS=Homo sapiens OX=9606 GN=PRPS1 PE=1 SV=2;sp|P60891|PRPS1_HUMAN Ribose-phosphate pyrophosphokinase 1 OS=Homo sapiens OX=9606 GN=PRPS1 PE=1 SV=2;tr|A0A2R8Y7H4|A0A2R8Y7H4_HUMAN I	2228100000	3399000000	4752800000	3439900000	1902200000	21533000000	1809600000	6823000000	1947500000	4973300000	3075300000	814350000	7559300000	778220000	6638800000	2509300000	3434800000	1812600000	1187700000	7535400000	7699600000	1794500000	3552500000	10288000000	7483900000	2858300000	10203000000	31841000000	2535500000	10925000000	19799000000	2387800000	6381600000	2772900000	2998000000	3362600000	8119100000	113340000	9906800000	2922900000	16796000000	3547900000	21490000000	10294000000	6018400000
C9IYZ1;Q9NWL6;U3KQP1	4	Asparagine synthetase domain-containing protein 1	ASNSD1	tr|C9IYZ1|C9IYZ1_HUMAN Isoform of Q9NWL6, Asparagine synthetase domain-containing protein 1 (Fragment) OS=Homo sapiens OX=9606 GN=ASNSD1 PE=1 SV=1;sp|Q9NWL6|ASND1_HUMAN Asparagine synthetase domain-containing protein 1 OS=Homo sapiens OX=9606 GN=ASNSD1 PE=	12058000000	8097400	695030	909810	12869000	26475000	1038700000	12315000	38555000	13418000	4603400	1051000	790790000	6112700	10616000	1615600	43103000	2970900000	35884000	76543000	184110000	31485000	45080000	171240000	35231000	24106000	11114000	285630000000	492290000	34723000	17025000000	7790400	78743000	4688500	8820900	31763000000	19621000	645450	29809000	2191100	221540	72859000	11056000000	141690000	1237300000
P07195;A0A3B3IS95;A8MW50;C9J7H8	5	L-lactate dehydrogenase B chain;L-lactate dehydrogenase	LDHB	sp|P07195|LDHB_HUMAN L-lactate dehydrogenase B chain OS=Homo sapiens OX=9606 GN=LDHB PE=1 SV=2;tr|A0A3B3IS95|A0A3B3IS95_HUMAN L-lactate dehydrogenase OS=Homo sapiens OX=9606 PE=3 SV=1;tr|A8MW50|A8MW50_HUMAN Isoform of P07195, L-lactate dehydrogenase (Fragm	2240200000	3729500000	3146200000	2851300000	2991400000	15503000000	3219400000	5549400000	3432400000	2718300000	3185700000	762110000	12779000000	2053000000	7177500000	6765500000	30639000000	3743200000	1872700000	8114200000	2882600000	2411000000	3552400000	7699500000	4475500000	1779700000	7466700000	38944000000	3229100000	10736000000	14557000000	2038600000	5266600000	3472000000	2331900000	2331200000	3948800000	105660000	5951800000	3202600000	8791700000	4527200000	25120000000	10493000000	13112000000
P61163;R4GMT0	3	Alpha-centractin	ACTR1A	sp|P61163|ACTZ_HUMAN Alpha-centractin OS=Homo sapiens OX=9606 GN=ACTR1A PE=1 SV=1;tr|R4GMT0|R4GMT0_HUMAN Isoform of P61163, Alpha-centractin OS=Homo sapiens OX=9606 GN=ACTR1A PE=1 SV=1	1776700000	2721100000	9963100000	744670000	2207100000	2113600000	629850000	14725000000	3073900000	15804000000	5821800000	2118000000	3682600000	650020000	22994000000	10328000000	8468000000	549910000	486950000	8150400000	3231200000	7735400000	16463000000	13312000000	15502000000	4127800000	16323000000	21806000000	6633300000	1982800000	10108000000	1768100000	8669900000	2228000000	4800500000	547920000	4706100000	54602000	10104000000	5641100000	8375000000	9607300000	6876900000	5053600000	6741600000
P13639	1	Elongation factor 2	EEF2	sp|P13639|EF2_HUMAN Elongation factor 2 OS=Homo sapiens OX=9606 GN=EEF2 PE=1 SV=4	25813000000	2329600000	2825800000	4413500000	1378200000	15584000000	577070000	5174900000	1570900000	3755600000	2228300000	983500000	9225800000	1357300000	3972100000	8951300000	17120000000	2117300000	2748800000	5631000000	12087000000	7124500000	7028100000	39670000000	9497100000	1323100000	5894200000	12457000000	2643200000	2884400000	4120000000	870410000	3521900000	1985300000	2971300000	1450100000	7256800000	1869500000	10098000000	5954800000	3983000000	15188000000	27326000000	6131100000	5053100000
Q8TBC4	1	NEDD8-activating enzyme E1 catalytic subunit	UBA3	sp|Q8TBC4|UBA3_HUMAN NEDD8-activating enzyme E1 catalytic subunit OS=Homo sapiens OX=9606 GN=UBA3 PE=1 SV=2	5807100000	5244900000	5404900000	2898600000	1921900000	12109000000	2500100000	4704600000	4614500000	3880000000	5722500000	1150300000	13756000000	1516800000	7007400000	6523300000	15918000000	1043800000	2165000000	6720100000	2095100000	4368700000	4873700000	10566000000	6471200000	1904400000	6507400000	14558000000	2266000000	9881600000	18749000000	1884000000	7418200000	3469000000	3622100000	3362400000	5725500000	319250000	9901400000	4703300000	13091000000	4780000000	36507000000	10173000000	9950400000
F8WCF6;P59998;P59998-3;H7C0A3	6	Actin-related protein 2/3 complex subunit 4	ARPC4-TTLL3	tr|F8WCF6|F8WCF6_HUMAN Isoform of A0A0A6YYG9, Actin-related protein 2/3 complex subunit 4 OS=Homo sapiens OX=9606 GN=ARPC4-TTLL3 PE=3 SV=1;sp|P59998|ARPC4_HUMAN Actin-related protein 2/3 complex subunit 4 OS=Homo sapiens OX=9606 GN=ARPC4 PE=1 SV=3;sp|P5999	1668500000	2415200000	1841100000	2991900000	1321400000	5808200000	5523900000	4026500000	2426200000	3104700000	3230900000	810120000	10376000000	830400000	4394900000	6374200000	13029000000	3796200000	1068200000	9472100000	3932500000	4614600000	5569400000	11885000000	7082500000	1332400000	11351000000	26105000000	3486000000	10277000000	13428000000	2506600000	3543100000	4252300000	2421000000	2649900000	7784000000	47435000	8869800000	2710700000	8429800000	8251800000	17457000000	17019000000	9593700000
P62805	1	Histone H4	HIST1H4A	sp|P62805|H4_HUMAN Histone H4 OS=Homo sapiens OX=9606 GN=HIST4H4 PE=1 SV=2	5292000000	4512300000	624790000	951420000	942420000	141240000000	185460000	2081500000	869350000	449080000	3150900000	868680000	2795900000	361200000	755330000	16629000000	6523000000	1192900000	5161800000	1064600000	19542000000	1485900000	2586200000	24174000000	2493800000	130420000	3091200000	1380200000	5994200000	1627300000	1919900000	1092200000	1716000000	1285000000	1543200000	100540000	864210000	23770000	23986000000	2811100000	1084200000	18375000000	20281000000	4453400000	883500000
Q96K21;H3BN64;H3BRF9;Q96K21-2;H3BRM1;Q96K21-4	7	Abscission/NoCut checkpoint regulator	ZFYVE19	sp|Q96K21|ANCHR_HUMAN Abscission/NoCut checkpoint regulator OS=Homo sapiens OX=9606 GN=ZFYVE19 PE=1 SV=3;tr|H3BN64|H3BN64_HUMAN Isoform of Q96K21, Abscission/NoCut checkpoint regulator (Fragment) OS=Homo sapiens OX=9606 GN=ZFYVE19 PE=1 SV=1;tr|H3BRF9|H3BRF	20981000	3146300	3891300	372440000	3640600	4303500000	16583000	2933600	0	51049000	114580000	0	30701000	422370	369800000	4723500	32834000	16112000	49168000	181170000000	14547000	44300000	38195000	479130000	98337000	6647800	258790000000	100260000	27093000	533350000	264560000	8053900	8407800	1037100	32642000	7013100	20702000	3342400	31906000	20690000	854200000	38089000	170940000	10948000	19860000
P26640;A0A140T936	8	Valine--tRNA ligase	VARS	sp|P26640|SYVC_HUMAN Valine--tRNA ligase OS=Homo sapiens OX=9606 GN=VARS PE=1 SV=4;tr|A0A140T936|A0A140T936_HUMAN Isoform of P26640, Valine--tRNA ligase (Fragment) OS=Homo sapiens OX=9606 GN=VARS PE=1 SV=1	18947000000	4607900000	4654300000	3138400000	2375800000	10973000000	157430000	8198200000	8686500000	6519600000	5396700000	3062100000	7899300000	3378900000	11039000000	8522900000	12224000000	1053000000	1987400000	13910000000	3513200000	11394000000	11831000000	26559000000	10774000000	1883200000	7913200000	6047500000	5331700000	1733200000	2687700000	490160000	5713700000	2926700000	4756300000	3111100000	1904400000	2978000000	5960300000	4768500000	2916000000	31200000000	14373000000	6247400000	8979400000
P49773	4	Histidine triad nucleotide-binding protein 1	HINT1	sp|P49773|HINT1_HUMAN Histidine triad nucleotide-binding protein 1 OS=Homo sapiens OX=9606 GN=HINT1 PE=1 SV=2	2055300000	2017100000	1348800000	2577000000	2801900000	12151000000	2214200000	2737100000	1785100000	3103800000	3769600000	585920000	5468500000	1305700000	4048300000	9054600000	22712000000	6428400000	2193300000	10454000000	3164500000	5117100000	7699100000	11988000000	6789600000	1253700000	8929600000	19538000000	4263100000	4320400000	3695000000	1840400000	2111800000	2479500000	3324700000	1696800000	3929400000	13225000	8289800000	2065600000	5329100000	1311700000	23465000000	16149000000	13047000000
Q9NZT1	1	Calmodulin-like protein 5	CALML5	sp|Q9NZT1|CALL5_HUMAN Calmodulin-like protein 5 OS=Homo sapiens OX=9606 GN=CALML5 PE=1 SV=2	100390000000	1471400000	1803100000	10340000000	471570000	3629100000	440340000	3088500000	591640000	296840000	1229400000	199930000	13238000000	1858900000	2714100000	1789300000	644550000	996920000	1097800000	1612400000	12186000000	7067300000	2220100000	119330000000	6739100000	164430000	504040000	3719600000	1123400000	158440000	371610000	188510000	380880000	25751000	1573400000	806140000	340220000	81920000	457820000	3648600000	295080000	20160000000	62106000000	3063300000	2288300000
O15020;O15020-2	5	Spectrin beta chain, non-erythrocytic 2	SPTBN2	sp|O15020|SPTN2_HUMAN Spectrin beta chain, non-erythrocytic 2 OS=Homo sapiens OX=9606 GN=SPTBN2 PE=1 SV=3;sp|O15020-2|SPTN2-2_HUMAN Isoform of O15020, Isoform 2 of Spectrin beta chain, non-erythrocytic 2 OS=Homo sapiens OX=9606 GN=SPTBN2 PE=1 SV=3	4156500000	2419600000	3288000000	1378700000	2121500000	3451900000	273760000	3411600000	5761800000	12875000000	5416000000	1326300000	5295900000	1020500000	15245000000	6124000000	7755800000	682730000	1119500000	16407000000	29401000000	18650000000	9727000000	55087000000	16924000000	969800000	15937000000	3935500000	14302000000	1405100000	1424100000	387860000	2728900000	2059500000	1913500000	642600000	1091600000	616730000	5534600000	1313400000	565920000	60575000000	4243100000	6345900000	5023400000
O00764;O00764-3;O00764-2	4	Pyridoxal kinase	PDXK	sp|O00764|PDXK_HUMAN Pyridoxal kinase OS=Homo sapiens OX=9606 GN=PDXK PE=1 SV=1;sp|O00764-3|PDXK-3_HUMAN Isoform of O00764, Isoform 3 of Pyridoxal kinase OS=Homo sapiens OX=9606 GN=PDXK PE=1 SV=1;sp|O00764-2|PDXK-2_HUMAN Isoform of O00764, Isoform 2 of Pyr	5765000000	4667600000	10461000000	2583800000	2276400000	2066200000	119380000	12431000000	4078500000	21864000000	2568800000	842670000	4961500000	1406800000	18572000000	19902000000	6496200000	4602500000	6965900000	10962000000	3870500000	12680000000	13896000000	19348000000	8805000000	1669200000	8500900000	13495000000	12110000000	898800000	7313900000	485470000	6208400000	862580000	6425600000	808760000	2968000000	16556000	4501900000	6273600000	2966000000	6884800000	8318100000	1338900000	13700000000
P62979;P0CG48;F5H2Z3;Q96C32;Q5PY61;J3QKN0;F5GXK7;F5H747;F5H388;B4DV12;F5H265;F5GYU3;F5H6Q2;J3QTR3;J3QS39;P0CG47;A0A2R8Y422;Q49A90;M0R1V7;F5GZ39;J3QSA3	21	Ubiquitin-40S ribosomal protein S27a;Ubiquitin;40S ribosomal protein S27a;Polyubiquitin-C;Ubiquitin;Polyubiquitin-B;Ubiquitin	RPS27A	sp|P62979|RS27A_HUMAN Ubiquitin-40S ribosomal protein S27a OS=Homo sapiens OX=9606 GN=RPS27A PE=1 SV=2;sp|P0CG48|UBC_HUMAN Polyubiquitin-C OS=Homo sapiens OX=9606 GN=UBC PE=1 SV=3;tr|F5H2Z3|F5H2Z3_HUMAN Isoform of P0CG48, Polyubiquitin-C (Fragment) OS=Homo	6580300000	2530000000	3027600000	3843000000	2345000000	15094000000	1359900000	3533400000	1886600000	2902300000	4194600000	993710000	7000000000	1413100000	8347700000	6285900000	7564500000	4836500000	2442500000	9241800000	10627000000	6582800000	3996500000	24008000000	9578300000	2774100000	8475800000	26343000000	3067900000	5636500000	5579800000	1252900000	4233400000	2797100000	2421800000	1798100000	3666200000	1204900000	4109900000	3584700000	3734000000	12413000000	29377000000	10688000000	5835300000
Q9NR46-2	1	Endophilin-B2	SH3GLB2	sp|Q9NR46-2|SHLB2-2_HUMAN Isoform of Q9NR46, Isoform 2 of Endophilin-B2 OS=Homo sapiens OX=9606 GN=SH3GLB2 PE=1 SV=1	1652500000	5104500000	7016000000	2972600000	4214500000	2375100000	17241000	7774100000	4070900000	15421000000	7406800000	2245500000	13460000000	1515800000	23756000000	11040000000	8361900000	5261700000	3521100000	8004500000	2018500000	2040400000	9058700000	11716000000	21728000000	42106000	13448000000	8577100000	7058200000	185390000	2295000000	152360000	1852400000	2241300000	3631500000	213600000	424500000	139200000	9576600000	6240300000	6010400000	8589500000	9556400000	827260000	10678000000
C9JE98;C9J0Q5;C9JFD3;Q9Y618-5;Q9Y618-4;Q9Y618;C9JQE8;C9J7T7;A0A384DVL6	16	Nuclear receptor corepressor 2	NCOR2	tr|C9JE98|C9JE98_HUMAN Isoform of Q9Y618, Nuclear receptor corepressor 2 OS=Homo sapiens OX=9606 GN=NCOR2 PE=1 SV=1;tr|C9J0Q5|C9J0Q5_HUMAN Isoform of Q9Y618, Nuclear receptor corepressor 2 OS=Homo sapiens OX=9606 GN=NCOR2 PE=1 SV=2;tr|C9JFD3|C9JFD3_HUMAN I	160800000	280960000	2842900	6766500	7312100	322540000	52145000	64409000	40614000	204490000	5689300	245590000	269020000	85403000	275140000	971280000	317640000	242530000	11059000	78879000	1486600000	114950000	161400000	229000000000	243700000	9836800	548510000	544890000	51453000	1275800000	29323000	10429000	689110000	13133000	7238700	3685400	218820000	947790	75818000	34319000	26156000	776630000	1777100000	740610000	93537000
P36543;C9J8H1	2	V-type proton ATPase subunit E 1	ATP6V1E1	sp|P36543|VATE1_HUMAN V-type proton ATPase subunit E 1 OS=Homo sapiens OX=9606 GN=ATP6V1E1 PE=1 SV=1;tr|C9J8H1|C9J8H1_HUMAN Isoform of P36543, V-type proton ATPase subunit E 1 (Fragment) OS=Homo sapiens OX=9606 GN=ATP6V1E1 PE=1 SV=1	4665500000	6381600000	6569500000	4437200000	2046000000	11534000000	7602600000	8887000000	3446900000	4999700000	2434200000	1019300000	10480000000	1573100000	11930000000	5260200000	13253000000	3537900000	2445900000	6054700000	2241100000	1890800000	3130900000	8895900000	6050800000	1132800000	9077500000	30452000000	3399500000	8364800000	12112000000	3153000000	3742900000	6832800000	4165200000	4697200000	6499400000	167790000	10283000000	4388700000	19303000000	4380500000	20231000000	9638300000	7705100000
P60201;P60201-2;B1B1G3;B1B1G4;B1B1G6	7	Myelin proteolipid protein	PLP1	sp|P60201|MYPR_HUMAN Myelin proteolipid protein OS=Homo sapiens OX=9606 GN=PLP1 PE=1 SV=2;sp|P60201-2|MYPR-2_HUMAN Isoform of P60201, Isoform DM-20 of Myelin proteolipid protein OS=Homo sapiens OX=9606 GN=PLP1 PE=1 SV=2;tr|B1B1G3|B1B1G3_HUMAN Isoform of P6	847770000	1130900000	1555200000	2143800000	1270600000	6462000000	1140900000	2826900000	1620000000	3968000000	2876800000	750480000	5000900000	273910000	4778400000	6493500000	4359700000	587940000	121110000	12008000000	1956000000	3352000000	3606600000	7447200000	1443500000	5145900000	11658000000	35919000000	928180000	13024000000	19459000000	2972300000	2060100000	4044500000	996290000	1639400000	12080000000	38568000	3541400000	2043500000	13061000000	4381900000	16083000000	26918000000	3228600000
E9PDR0;P05166;C9JQS9;E7EX59;P05166-2;E7ETT1;E7ETT4;E7EUY3;F8WBI9;E9PEC3;E7ENC1	15	Propionyl-CoA carboxylase beta chain, mitochondrial	PCCB	tr|E9PDR0|E9PDR0_HUMAN Isoform of P05166, Propionyl-CoA carboxylase beta chain, mitochondrial OS=Homo sapiens OX=9606 GN=PCCB PE=1 SV=1;sp|P05166|PCCB_HUMAN Propionyl-CoA carboxylase beta chain, mitochondrial OS=Homo sapiens OX=9606 GN=PCCB PE=1 SV=3;tr|C9	116590000	547310000	256800000	603990000	228830000	2814400000	3209300000	1098200000	259570000	241240000	375550000	25638000	2436800000	99423000	804620000	3786700000	9675200000	21312000000	702810000	678680000	744470000	587320000	583900000	2489600000	2085300000	464630000	2024400000	6177900000	929430000	4084900000	2555500000	351650000	435190000	957730000	336240000	313510000	1075600000	329940000	918750000	1104600000	3455400000	543290000	3766300000	56574000000	2957600000
G3XAH0;E7EPG2	2	Septin-5	SEPTIN5	tr|G3XAH0|G3XAH0_HUMAN Isoform of Q99719, HCG2002594, isoform CRA_c OS=Homo sapiens OX=9606 GN=SEPTIN5 PE=1 SV=1;tr|E7EPG2|E7EPG2_HUMAN Isoform of Q99719, Septin 5 (Fragment) OS=Homo sapiens OX=9606 GN=SEPTIN5 PE=1 SV=1	443320000	3259200000	4158100000	598220000	1496400000	843270000	975990000	3570600000	1547400000	6065700000	2885000000	461050000	10052000000	894130000	8361200000	11783000000	32086000000	1889800000	1896900000	2503500000	263910000	6248900000	5457600000	14002000000	16345000000	417820000	3683700000	38627000000	9812800000	4910100000	13097000000	440960000	5177500000	2777900000	979690000	337690000	4003600000	1801400	5676000000	2583600000	8227100000	3227300000	4595500000	2850100000	7146400000
P19367;P19367-4;P19367-2;P19367-3	7	Hexokinase-1	HK1	sp|P19367|HXK1_HUMAN Hexokinase-1 OS=Homo sapiens OX=9606 GN=HK1 PE=1 SV=3;sp|P19367-4|HXK1-4_HUMAN Isoform of P19367, Isoform 4 of Hexokinase-1 OS=Homo sapiens OX=9606 GN=HK1 PE=1 SV=3;sp|P19367-2|HXK1-2_HUMAN Isoform of P19367, Isoform 2 of Hexokinase-1	1212000000	1297800000	1744900000	687410000	860870000	17170000000	28173000	4318100000	5767600000	6752400000	3567100000	891700000	15115000000	694880000	10615000000	30034000000	42757000000	570500000	1768300000	1807500000	5013600000	9258600000	15349000000	15382000000	3812000000	315160000	7860500000	35107000000	3812000000	15188000000	3164900000	431720000	3653200000	589140000	1219000000	2135700000	3018000000	254620000	7504200000	8199200000	2145400000	8380800000	3525000000	3742300000	9720100000
P25786-2;P25786;B4DEV8	3	Proteasome subunit alpha type-1;Proteasome subunit alpha type	PSMA1	sp|P25786-2|PSA1-2_HUMAN Isoform of P25786, Isoform Long of Proteasome subunit alpha type-1 OS=Homo sapiens OX=9606 GN=PSMA1 PE=1 SV=1;sp|P25786|PSA1_HUMAN Proteasome subunit alpha type-1 OS=Homo sapiens OX=9606 GN=PSMA1 PE=1 SV=1;tr|B4DEV8|B4DEV8_HUMAN Pr	8482800000	6133000000	2695800000	7349700000	1558300000	7847800000	2668700000	4152600000	2339400000	2263200000	2551900000	495330000	9044300000	1832300000	3455000000	5438800000	7913000000	5052100000	2978400000	4756300000	16547000000	5035700000	4049100000	23622000000	9140300000	684010000	5303100000	11550000000	4614200000	5403100000	6770500000	715170000	3198800000	3145700000	1947900000	2189300000	2426300000	180190000	5471000000	3997900000	4802000000	7778500000	30984000000	6949000000	15119000000
O15144	5	Actin-related protein 2/3 complex subunit 2	ARPC2	sp|O15144|ARPC2_HUMAN Actin-related protein 2/3 complex subunit 2 OS=Homo sapiens OX=9606 GN=ARPC2 PE=1 SV=1	1614200000	4123700000	2888600000	2514400000	1486100000	4007400000	3116300000	4830000000	2929500000	4962700000	2503400000	708700000	12307000000	928240000	4634700000	5828500000	9376900000	1755100000	821440000	5502100000	18879000000	2502600000	4039200000	7210000000	5488900000	1480800000	10437000000	22476000000	2893200000	11018000000	18358000000	4091000000	3384000000	3783100000	2168300000	1545200000	7027400000	43492000	10941000000	2624800000	10006000000	6038600000	13748000000	9858300000	6984400000
Q9P2E9;A0A087WVV2;Q9P2E9-3;F8W7S5	5	Ribosome-binding protein 1	RRBP1	sp|Q9P2E9|RRBP1_HUMAN Ribosome-binding protein 1 OS=Homo sapiens OX=9606 GN=RRBP1 PE=1 SV=5;tr|A0A087WVV2|A0A087WVV2_HUMAN Isoform of Q9P2E9, Ribosome-binding protein 1 OS=Homo sapiens OX=9606 GN=RRBP1 PE=1 SV=1;sp|Q9P2E9-3|RRBP1-3_HUMAN Isoform of Q9P2E9,	3917100000	1526800000	752520000	2131500000	466960000	45160000000	160330000	1722800000	771070000	608470000	4318000000	339660000	4262100000	1648400000	6344600000	140180000000	3553500000	946640000	448520000	2628100000	1022400000	10601000000	2809300000	12095000000	2236700000	491500000	3802200000	40695000000	576640000	1184800000	2522000000	90746000	3664900000	971700000	820110000	1047000000	2358300000	841920000	686930000	769260000	1060800000	55229000000	12894000000	8737400000	1663600000
Q709C8;Q709C8-3;Q709C8-2;Q709C8-4	6	Vacuolar protein sorting-associated protein 13C	VPS13C	sp|Q709C8|VP13C_HUMAN Vacuolar protein sorting-associated protein 13C OS=Homo sapiens OX=9606 GN=VPS13C PE=1 SV=1;sp|Q709C8-3|VP13C-3_HUMAN Isoform of Q709C8, Isoform 3 of Vacuolar protein sorting-associated protein 13C OS=Homo sapiens OX=9606 GN=VPS13C PE	25770000000	1895800000	5588300000	4875400000	1499600000	3018800000	957440000	6171200000	3217500000	3288900000	2707200000	1041300000	5312900000	1667300000	7923400000	6145900000	6788100000	551120000	422590000	5546300000	13876000000	3072400000	2823900000	17227000000	37278000000	1560300000	3139000000	5769500000	1391000000	5655700000	5024500000	2023500000	3781600000	3159200000	1073200000	1870600000	2935100000	5900200000	18126000000	2495500000	2783700000	12129000000	27950000000	9259300000	3020100000
Q01433;H0Y360;Q01433-2;Q01433-5	8	AMP deaminase 2	AMPD2	sp|Q01433|AMPD2_HUMAN AMP deaminase 2 OS=Homo sapiens OX=9606 GN=AMPD2 PE=1 SV=2;tr|H0Y360|H0Y360_HUMAN Isoform of Q01433, AMP deaminase 2 (Fragment) OS=Homo sapiens OX=9606 GN=AMPD2 PE=1 SV=1;sp|Q01433-2|AMPD2-2_HUMAN Isoform of Q01433, Isoform Ex1A-2-3 o	1102700000	3546500000	1787000000	5060000000	2478400000	10254000000	300390000	9957100000	1261500000	3444500000	3201300000	2657400000	4157800000	1228600000	3685200000	2367100000	4430900000	2141300000	3356800000	4226900000	1682000000	2708100000	5455700000	3921200000	5351100000	1217200000	7645500000	27479000000	2537100000	14788000000	13550000000	3963000000	4456900000	3063500000	3398500000	4025200000	8303400000	8405300000	9254500000	4230000000	12947000000	11698000000	23194000000	11085000000	5518000000
P61247;D6RG13;D6RAT0;D6RB09;E9PFI5;H0Y9Y4;H0Y8L7;D6R9B6	12	40S ribosomal protein S3a	RPS3A	sp|P61247|RS3A_HUMAN 40S ribosomal protein S3a OS=Homo sapiens OX=9606 GN=RPS3A PE=1 SV=2;tr|D6RG13|D6RG13_HUMAN Isoform of P61247, 40S ribosomal protein S3a (Fragment) OS=Homo sapiens OX=9606 GN=RPS3A PE=1 SV=1;tr|D6RAT0|D6RAT0_HUMAN Isoform of P61247, 40	21870000	225350000	230740000	6817300	104450000	3049000000	26864000	665860000	106940000	498500000	344050000	90532000	180060000	812340	7211700000	1875400000	62576000	0	37764000	17709000	337480000	278680000	3430500000	163830000000	114710000000	229830000	1998800000	1221500000	221040000	36741000	994710000	71661000	14960000	485670000	28283000	992220	2726000000	0	2565700000	457330000	162410000	96873000000	210340000	557810000	145560000
Q7Z6Z7-2;Q7Z6Z7;Q7Z6Z7-3	6	E3 ubiquitin-protein ligase HUWE1	HUWE1	sp|Q7Z6Z7-2|HUWE1-2_HUMAN Isoform of Q7Z6Z7, Isoform 2 of E3 ubiquitin-protein ligase HUWE1 OS=Homo sapiens OX=9606 GN=HUWE1 PE=1 SV=3;sp|Q7Z6Z7|HUWE1_HUMAN E3 ubiquitin-protein ligase HUWE1 OS=Homo sapiens OX=9606 GN=HUWE1 PE=1 SV=3;sp|Q7Z6Z7-3|HUWE1-3_HU	26986000000	1455700000	3121800000	2612900000	1617400000	2771400000	832320000	7335300000	2282600000	6708900000	4670800000	1521200000	3752800000	1640400000	12715000000	6110200000	5772100000	1686800000	1617200000	10238000000	4279400000	4646700000	9534100000	10546000000	5874000000	1479900000	8715200000	20720000000	8673900000	1707200000	3848800000	1168500000	3332400000	1603100000	3158300000	1604900000	7914000000	1484000000	8218600000	2387300000	3727100000	14569000000	20806000000	4603900000	4957000000
P07384	11	Calpain-1 catalytic subunit	CAPN1	sp|P07384|CAN1_HUMAN Calpain-1 catalytic subunit OS=Homo sapiens OX=9606 GN=CAPN1 PE=1 SV=1	3930800000	4347400000	4126300000	4789000000	1377400000	14670000000	1451900000	5514300000	2838500000	3270600000	2689100000	1166500000	12690000000	1489700000	4886600000	5405300000	12125000000	1362500000	1737400000	4321500000	2373600000	3073600000	4280000000	10516000000	6382100000	3268600000	6369000000	12827000000	1609100000	20904000000	10628000000	916440000	8607100000	4164900000	2185800000	2417200000	6395000000	5261900000	4610200000	4035200000	5081700000	9640200000	22299000000	12217000000	5673600000
P07686;Q5URX0;H0YA83;H0Y9B6	5	Beta-hexosaminidase subunit beta;Beta-hexosaminidase subunit beta chain B;Beta-hexosaminidase subunit beta chain A	HEXB	sp|P07686|HEXB_HUMAN Beta-hexosaminidase subunit beta OS=Homo sapiens OX=9606 GN=HEXB PE=1 SV=3;tr|Q5URX0|Q5URX0_HUMAN Isoform of P07686, Beta-hexosaminidase subunit beta OS=Homo sapiens OX=9606 GN=HEXB PE=1 SV=1;tr|H0YA83|H0YA83_HUMAN Isoform of P07686, B	2693500000	1705600000	1798600000	2970100000	918970000	5010700000	12202000000	3368200000	1225600000	1767600000	2370500000	558150000	5874500000	572520000	3045200000	4946900000	6794300000	1460200000	670440000	6592300000	4480800000	3130500000	6339800000	3380400000	1758900000	565810000	4692300000	9340400000	1708500000	10181000000	7410300000	1368800000	2020300000	1695700000	4033200000	1964500000	6356100000	173850000	5140700000	4278600000	6542800000	11591000000	19899000000	9196300000	5571700000
Q01813;Q01813-2;B1APP6	8	ATP-dependent 6-phosphofructokinase, platelet type	PFKP	sp|Q01813|PFKAP_HUMAN ATP-dependent 6-phosphofructokinase, platelet type OS=Homo sapiens OX=9606 GN=PFKP PE=1 SV=2;sp|Q01813-2|PFKAP-2_HUMAN Isoform of Q01813, Isoform 2 of ATP-dependent 6-phosphofructokinase, platelet type OS=Homo sapiens OX=9606 GN=PFKP	3409800000	3524200000	2746300000	2790800000	1635900000	2035600000	68330000	9773400000	2405000000	20741000000	2900900000	979020000	14612000000	874860000	4277900000	9014100000	7567800000	2910500000	2851700000	4014400000	4409400000	2671400000	18034000000	5332100000	3347800000	2931300000	10127000000	39346000000	2918000000	1597000000	13836000000	889790000	4230000000	2846800000	2934300000	1582400000	17983000000	1625000000	5732900000	3432900000	3019100000	8755600000	18319000000	4185500000	3888300000
B0QY89;Q9Y262;Q9Y262-2;B0QY90	7	Eukaryotic translation initiation factor 3 subunit L	EIF3L	tr|B0QY89|B0QY89_HUMAN Isoform of Q9Y262, Eukaryotic translation initiation factor 3 subunit L OS=Homo sapiens OX=9606 GN=EIF3L PE=1 SV=1;sp|Q9Y262|EIF3L_HUMAN Eukaryotic translation initiation factor 3 subunit L OS=Homo sapiens OX=9606 GN=EIF3L PE=1 SV=1;	265760000	764260000	558840000	62064000	181560000	1910200000	68452000	1394200000	437830000	1062300000	540710000	351380000	69872000000	29955000	2633700000	2558500000	2283500000	182400000	21776000	516040000	324630000	2248200000	2051100000	177590000000	1789100000	596180000	1669500000	742740000	641680000	303270000	1009100000	71913000	384860000	716680000	90201000	40497000	571290000	73173000	1805900000	168180000	413680000	3777800000	1079300000	612720000	556120000
A0A096LPE2;P35542	4	Serum amyloid A-4 protein	SAA2-SAA4	tr|A0A096LPE2|A0A096LPE2_HUMAN SAA2-SAA4 readthrough OS=Homo sapiens OX=9606 GN=SAA2-SAA4 PE=4 SV=1;sp|P35542|SAA4_HUMAN Serum amyloid A-4 protein OS=Homo sapiens OX=9606 GN=SAA4 PE=1 SV=2	54823000	70610000	222160000	103830000	26329000	224260000	25493000	64615000	35657000000	314020000	32137000	7273900	162770000	45326000	62338000	703860000	212930000000	0	62813000	147870000	10102000	0	1552000000	61089000	71720000	393490000	113530000	3682300000	0	97637000	507060000	96547000	536870000	287160000	26360000	4234300	785170000	0	48419000	327220000	138090000000	64484000	202180000	244700000	74539000
Q562R1	1	Beta-actin-like protein 2	ACTBL2	sp|Q562R1|ACTBL_HUMAN Beta-actin-like protein 2 OS=Homo sapiens OX=9606 GN=ACTBL2 PE=1 SV=2	24487000000	422300000	1213300000	1149800000	1635900000	4193000000	2840400000	390840000	272690000	6533200000	1899200000	1373600000	2436200000	2682800000	3626900000	687740000	1503100000	742120000	172670000	8328100000	4321100000	181400000	451470000	1063500000	1223600000	151710000	5335000000	27310000000	656200000	5950600000	13913000000	2636000000	3559000000	856340000	1228900000	2660000000	303190000	4480800	12073000000	269220000	10946000000	424250000	2357200000	12162000000	1416000000
P07099	3	Epoxide hydrolase 1	EPHX1	sp|P07099|HYEP_HUMAN Epoxide hydrolase 1 OS=Homo sapiens OX=9606 GN=EPHX1 PE=1 SV=1	2972400000	3493900000	5098700000	1166000000	596130000	19746000000	273070000	5774400000	1904300000	3532200000	4023800000	491440000	4036300000	469440000	12589000000	5913800000	4452600000	588350000	605780000	2685700000	1167300000	3851700000	5262200000	6098000000	3009000000	7240000000	12525000000	19609000000	497520000	15241000000	21314000000	3404200000	6769100000	3718900000	979600000	1510300000	7966600000	187050000	8826300000	2553300000	10803000000	5192700000	10626000000	13718000000	2647900000
P30622;A0A3B3ITA2	6	CAP-Gly domain-containing linker protein 1	CLIP1	sp|P30622|CLIP1_HUMAN CAP-Gly domain-containing linker protein 1 OS=Homo sapiens OX=9606 GN=CLIP1 PE=1 SV=2;tr|A0A3B3ITA2|A0A3B3ITA2_HUMAN Isoform of P30622, CAP-Gly domain-containing linker protein 1 (Fragment) OS=Homo sapiens OX=9606 GN=CLIP1 PE=1 SV=1	615220000	643820000	706840000	11555000000	657070000	1060100000	36861000	1203600000	669330000	748850000	747490000	769920000	3927800000	445410000	2626900000	1353000000	1433100000	5865500000	648140000	5742600000	2630800000	46657000000	4560900000	6424000000	28928000000	600360000	22523000000	6982200000	30778000000	641810000	3061800000	164280000	674710000	388640000	3005400000	305510000	879210000	3145100000	2292000000	727910000	774420000	80375000000	22652000000	13587000000	15665000000
P13489	10	Ribonuclease inhibitor	RNH1	sp|P13489|RINI_HUMAN Ribonuclease inhibitor OS=Homo sapiens OX=9606 GN=RNH1 PE=1 SV=2	1003600000	2806200000	1539800000	1444400000	945830000	5876200000	576980000	9953000000	3798300000	10308000000	4897800000	865520000	1491300000	425710000	7482500000	7447200000	20112000000	9388400000	6564800000	2507100000	5751500000	6181100000	4631300000	11447000000	9777000000	3153100000	15071000000	19682000000	6808600000	408240000	3561200000	295730000	32819000000	775440000	8944200000	159420000	2286400000	670820000	13717000000	4424200000	4250200000	8632100000	3681700000	4024900000	14093000000
P49821;G3V0I5;P49821-2;B4DE93	14	NADH dehydrogenase [ubiquinone] flavoprotein 1, mitochondrial	NDUFV1	sp|P49821|NDUV1_HUMAN NADH dehydrogenase [ubiquinone] flavoprotein 1, mitochondrial OS=Homo sapiens OX=9606 GN=NDUFV1 PE=1 SV=4;tr|G3V0I5|G3V0I5_HUMAN Isoform of P49821, NADH dehydrogenase [ubiquinone] flavoprotein 1, mitochondrial OS=Homo sapiens OX=9606	46284000	139800000	168290000	203310000	134360000	495420000	1794700000	406350000	188880000	210640000	326890000	7233300	1784100000	363770000	760330000	6030400000	238010000000	35536000000	313740000	506710000	423090000	24296000000	64540000000	1103600000	837180000	210130000	429330000	3900900000	135730000	1192300000	2514700000	345900000	288290000	411710000	115090000	335180000	3036800000	8659400	751400000	264780000	3415700000	149790000	3808500000	860170000	386670000
Q01518	10	Adenylyl cyclase-associated protein 1	CAP1	sp|Q01518|CAP1_HUMAN Adenylyl cyclase-associated protein 1 OS=Homo sapiens OX=9606 GN=CAP1 PE=1 SV=5	7635000000	5096000000	3985100000	4126000000	2184000000	4406400000	2939500000	2684600000	2303700000	7933900000	3215600000	647210000	7334900000	2491800000	5216300000	5942700000	2413800000	7883200000	9462800000	4241800000	5455400000	5163700000	6363200000	16013000000	6452400000	666610000	4972900000	2859500000	4796700000	7079900000	7333000000	924090000	10256000000	4422400000	2890300000	2991800000	1878100000	2018300000	4869500000	6629900000	13920000000	3163300000	24431000000	4255000000	7547100000
O75369-8	1	Filamin-B	FLNB	sp|O75369-8|FLNB-8_HUMAN Isoform of O75369, Isoform 8 of Filamin-B OS=Homo sapiens OX=9606 GN=FLNB PE=1 SV=2	10789000000	1418900000	2368100000	2714200000	1014700000	10452000000	217350000	4056400000	1414500000	1322600000	2690500000	278200000	4937500000	891820000	7716100000	3754000000	4711100000	4438300000	2275600000	9549500000	14549000000	3652300000	1894200000	54461000000	9205600000	4219900000	7471200000	10085000000	891610000	7694600000	3551800000	1249000000	8851300000	2334000000	2895100000	5175300000	2696300000	2438200000	6231900000	2689100000	3579300000	10625000000	25669000000	7549500000	6849200000
Q9UPY8;C9JB30	2	Microtubule-associated protein RP/EB family member 3	MAPRE3	sp|Q9UPY8|MARE3_HUMAN Microtubule-associated protein RP/EB family member 3 OS=Homo sapiens OX=9606 GN=MAPRE3 PE=1 SV=1;tr|C9JB30|C9JB30_HUMAN Isoform of Q9UPY8, Microtubule-associated protein RP/EB family member 3 (Fragment) OS=Homo sapiens OX=9606 GN=MAPR	649870000	4482400000	2652000000	888640000	4139100000	2792700000	241360000	5515700000	3582200000	11251000000	3570600000	3294800000	11327000000	686240000	18854000000	11224000000	3243100000	561650000	267350000	10081000000	4442100000	5570500000	11201000000	7896000000	9044300000	725870000	5427500000	4828000000	8687000000	2043300000	1846700000	309840000	886700000	3009700000	1544400000	356130000	1901500000	0	7162000000	2071800000	6099700000	8792700000	7598000000	1883400000	12673000000
Q9ULV4;Q9ULV4-2;Q9ULV4-3;B4E3S0;H0YHL7	12	Coronin-1C;Coronin	CORO1C	sp|Q9ULV4|COR1C_HUMAN Coronin-1C OS=Homo sapiens OX=9606 GN=CORO1C PE=1 SV=1;sp|Q9ULV4-2|COR1C-2_HUMAN Isoform of Q9ULV4, Isoform 2 of Coronin-1C OS=Homo sapiens OX=9606 GN=CORO1C PE=1 SV=1;sp|Q9ULV4-3|COR1C-3_HUMAN Isoform of Q9ULV4, Isoform 3 of Coronin-	398210000	3034000000	2855800000	1003500000	1642700000	619080000	531610000	3910400000	2165300000	3833400000	4152900000	902920000	7061900000	604980000	6149100000	3821300000	3532000000	72937000	249450000	5361000000	2829600000	1259800000	5095900000	11754000000	7126300000	988010000	34974000000	52706000000	2623400000	386760000	5054000000	1335700000	2561400000	2537100000	2207300000	402090000	4282100000	88882000	8222000000	4185000000	7246100000	3613300000	11299000000	3459500000	6024500000
O95373	3	Importin-7	IPO7	sp|O95373|IPO7_HUMAN Importin-7 OS=Homo sapiens OX=9606 GN=IPO7 PE=1 SV=1	3500300000	2921000000	3842200000	2459900000	1238400000	5469400000	70250000	7161500000	4701000000	7842100000	3985400000	2984600000	7180700000	1431000000	5499300000	9161400000	6134300000	925830000	1102900000	9296400000	1531900000	7342200000	5496300000	13715000000	5130300000	2154600000	5819000000	6826200000	2671400000	8964700000	6681300000	1228000000	6907900000	2034600000	2150200000	2036500000	6331300000	1930900000	12420000000	4561300000	4448400000	12757000000	10898000000	8923000000	3290700000
P00488	4	Coagulation factor XIII A chain	F13A1	sp|P00488|F13A_HUMAN Coagulation factor XIII A chain OS=Homo sapiens OX=9606 GN=F13A1 PE=1 SV=4	122740000	9380100000	5893200000	6161500000	597780000	4732100000	94229000	13126000000	718220000	961670000	7111000000	583740000	10444000000	469500000	15192000000	5566300000	1044800000	312190000	514330000	857260000	660830000	2109500000	1922300000	5917300000	2658400000	3410200000	2883500000	4647100000	274000000	12539000000	21801000000	1830200000	4380000000	12972000000	727510000	7845300000	24625000000	1290900000	4755200000	15654000000	4247500000	8370500000	14102000000	8269200000	1075200000
Q9Y5K8;G3V2S6;G3V2V6;H0YJH8;G3V559	10	V-type proton ATPase subunit D	ATP6V1D	sp|Q9Y5K8|VATD_HUMAN V-type proton ATPase subunit D OS=Homo sapiens OX=9606 GN=ATP6V1D PE=1 SV=1;tr|G3V2S6|G3V2S6_HUMAN Isoform of Q9Y5K8, V-type proton ATPase subunit D OS=Homo sapiens OX=9606 GN=ATP6V1D PE=1 SV=1;tr|G3V2V6|G3V2V6_HUMAN Isoform of Q9Y5K8,	2911400000	4979100000	13147000000	2876900000	1625800000	13023000000	2132700000	20566000000	1881000000	2490600000	1832900000	522580000	5354500000	1350900000	4247800000	5359800000	9639500000	2777800000	1502200000	29023000000	4398400000	2514600000	4215200000	3431600000	5075400000	937690000	9018100000	25774000000	3365100000	3965400000	10682000000	1476900000	2062300000	2621300000	1755900000	2260400000	2880800000	103050000	4453600000	2666300000	6787900000	5518800000	12266000000	6955400000	6345500000
P54750-4;P54750-6;P54750-5;P54750-7	4	Calcium/calmodulin-dependent 3,5-cyclic nucleotide phosphodiesterase 1A	PDE1A	sp|P54750-4|PDE1A-4_HUMAN Isoform of P54750, Isoform 4 of Calcium/calmodulin-dependent 3,5-cyclic nucleotide phosphodiesterase 1A OS=Homo sapiens OX=9606 GN=PDE1A PE=2 SV=2;sp|P54750-6|PDE1A-6_HUMAN Isoform of P54750, Isoform 6 of Calcium/calmodulin-depe	4406400000	2031900000	3720000000	1764500000	1358700000	2440900000	485130000	3195600000	1974800000	4673100000	3475100000	1702800000	9094600000	1463200000	3892800000	2953700000	25586000000	917150000	1523800000	5052700000	950890000	2870300000	3819400000	4291000000	4653300000	489830000	21107000000	56504000000	2757500000	955350000	5672800000	1100700000	446310000	2258300000	1387500000	1331800000	4691400000	1073300000	3129700000	2682400000	7226600000	2636300000	10493000000	5171900000	4816300000
P31947;P31947-2	2	14-3-3 protein sigma	SFN	sp|P31947|1433S_HUMAN 14-3-3 protein sigma OS=Homo sapiens OX=9606 GN=SFN PE=1 SV=1;sp|P31947-2|1433S-2_HUMAN Isoform of P31947, Isoform 2 of 14-3-3 protein sigma OS=Homo sapiens OX=9606 GN=SFN PE=1 SV=1	19909000000	5521400000	1611500000	1842200000	4119200000	20494000000	282360000	23816000000	1040700000	18679000000	519100000	585700000	1782800000	880070000	1009400000	7445200000	3718300000	2301600000	499640000	1554200000	10655000000	6398400000	2863200000	40831000000	5749200000	1145700000	2127600000	5175900000	8154900000	398980000	1767200000	328200000	842540000	319040000	8640500000	1004800000	1347300000	66135000	3193300000	1564700000	1438400000	6918100000	17738000000	4638900000	3041000000
Q99832;Q99832-3	4	T-complex protein 1 subunit eta	CCT7	sp|Q99832|TCPH_HUMAN T-complex protein 1 subunit eta OS=Homo sapiens OX=9606 GN=CCT7 PE=1 SV=2;sp|Q99832-3|TCPH-3_HUMAN Isoform of Q99832, Isoform 3 of T-complex protein 1 subunit eta OS=Homo sapiens OX=9606 GN=CCT7 PE=1 SV=2	2142800000	3973700000	3917200000	1965000000	1506400000	8146200000	4284500000	5804100000	3118600000	7197600000	4311600000	1122500000	10059000000	694200000	6880100000	7027600000	11612000000	1050200000	1874600000	5446000000	4614200000	6013200000	8165900000	10542000000	6580500000	2152400000	6290800000	17287000000	2357800000	16130000000	10913000000	2210100000	5810200000	3447800000	2186500000	2203000000	8012700000	1098500000	7944300000	3135800000	8552800000	4299600000	11992000000	7539600000	5081000000
P10909-6	1	Clusterin;Clusterin beta chain;Clusterin alpha chain	CLU	sp|P10909-6|CLUS-6_HUMAN Isoform of P10909, Isoform 6 of Clusterin OS=Homo sapiens OX=9606 GN=CLU PE=1 SV=1	1023700000	2376900000	2856600000	1132500000	1266700000	2643900000	1296700000	2371300000	874370000	2368900000	2692000000	772900000	2368800000	727880000	4963500000	5270100000	3744100000	1121300000	1280400000	4922300000	659400000	2789100000	3054200000	10292000000	5081000000	2740800000	4329100000	29712000000	1285000000	18847000000	7327200000	1398100000	3375900000	1994600000	1330600000	921140000	4569100000	174140000	4946200000	2113800000	7236600000	3065300000	18715000000	11042000000	6001600000
Q96KN2	1	Beta-Ala-His dipeptidase	CNDP1	sp|Q96KN2|CNDP1_HUMAN Beta-Ala-His dipeptidase OS=Homo sapiens OX=9606 GN=CNDP1 PE=1 SV=4	5546900000	1871200000	2064500000	2122500000	570400000	3647600000	473140000	2288200000	1450000000	1109600000	785560000	865960000	4363100000	1031400000	975670000	1826800000	948290000	348460000	1866300000	5221000000	241700000	724610000	1011800000	2301800000	1812300000	235330000	2148400000	8708300000	446430000	15456000000	12661000000	1825200000	1310900000	2687800000	2863500000	6282500000	3350600000	3337900000	87349000000	2360700000	10680000000	1339200000	27661000000	6521200000	5587800000
A0A0A0MTS7;Q8WZ42-12;Q8WZ42-13;Q8WZ42-8;Q8WZ42;Q8WZ42-2;Q8WZ42-11;Q8WZ42-7;Q8WZ42-4;Q8WZ42-5;Q8WZ42-10;Q8WZ42-9;Q8WZ42-3;A0A0A0MRA3	18	Titin	TTN	tr|A0A0A0MTS7|A0A0A0MTS7_HUMAN Isoform of Q8WZ42, Titin OS=Homo sapiens OX=9606 GN=TTN PE=1 SV=1;sp|Q8WZ42-12|TITIN-12_HUMAN Isoform of Q8WZ42, Isoform 12 of Titin OS=Homo sapiens OX=9606 GN=TTN PE=1 SV=4;sp|Q8WZ42-13|TITIN-13_HUMAN Isoform of Q8WZ42, Isof	3058400000	1915900000	3983800000	5374300000	1422400000	20891000000	1156500000	3314600000	1722700000	1749400000	3185300000	522120000	10856000000	336440000	6596100000	17304000000	12595000000	6316600000	887840000	6462100000	2686500000	14363000000	4876700000	23844000000	17915000000	876540000	5210700000	17384000000	3694100000	6295900000	3359400000	1144700000	2484600000	1938700000	6706900000	528880000	3146700000	598820000	1358800000	1653100000	2630500000	9609000000	9859900000	9893400000	8634300000
P09471-2	1	Guanine nucleotide-binding protein G(o) subunit alpha	GNAO1	sp|P09471-2|GNAO-2_HUMAN Isoform of P09471, Isoform Alpha-2 of Guanine nucleotide-binding protein G(o) subunit alpha OS=Homo sapiens OX=9606 GN=GNAO1 PE=1 SV=4	338570000	1778700000	1259200000	1394800000	1394400000	837010000	5307500000	2339300000	1733200000	5181100000	5048800000	679750000	7075900000	316620000	6536600000	14261000000	30578000000	627690000	531930000	2303100000	611620000	13094000000	6077800000	11707000000	7481500000	892080000	3742400000	19912000000	3695400000	4027400000	9442200000	1399900000	1978300000	2242400000	873060000	563590000	9807600000	36145000	3540300000	2148700000	7587800000	1653200000	7741300000	6134200000	2845100000
Q02790	3	Peptidyl-prolyl cis-trans isomerase FKBP4;Peptidyl-prolyl cis-trans isomerase FKBP4, N-terminally processed	FKBP4	sp|Q02790|FKBP4_HUMAN Peptidyl-prolyl cis-trans isomerase FKBP4 OS=Homo sapiens OX=9606 GN=FKBP4 PE=1 SV=3	3012500000	4635100000	5547000000	2501200000	1898400000	3554300000	168270000	8639400000	3345400000	9626400000	4231400000	1371300000	7078400000	1332200000	12353000000	10004000000	4744300000	2394600000	6345700000	12837000000	1967400000	2994500000	6868500000	10003000000	10630000000	766000000	12687000000	10160000000	5982100000	2022400000	977400000	234170000	8815300000	2492300000	1829300000	1325500000	775010000	2504600000	5537200000	3161300000	1499800000	4948900000	15124000000	1271000000	15687000000
P07737	1	Profilin-1	PFN1	sp|P07737|PROF1_HUMAN Profilin-1 OS=Homo sapiens OX=9606 GN=PFN1 PE=1 SV=2	3863600000	3831700000	2611400000	3605300000	513530000	7701800000	4916500000	7204100000	2321200000	2806700000	3378300000	767970000	12196000000	699440000	2197300000	4330900000	4290500000	5407800000	2012700000	5913100000	4136700000	1931000000	2164300000	10850000000	5873100000	1003400000	4683700000	10816000000	1910800000	13385000000	9211500000	1811000000	8844700000	2368800000	2526000000	4103400000	4608900000	20839000	8311500000	2670700000	6754300000	1173600000	15441000000	12410000000	7061300000
B4DUC8	3	S-methyl-5-thioadenosine phosphorylase	MTAP	tr|B4DUC8|B4DUC8_HUMAN Isoform of Q13126, S-methyl-5-thioadenosine phosphorylase OS=Homo sapiens OX=9606 GN=MTAP PE=1 SV=1	3362800000	2727900000	1803600000	2974800000	529750000	9773500000	3936300000	4023700000	1035700000	792650000	1238500000	314630000	5482000000	543040000	1502900000	3465600000	3896700000	1296200000	669920000	4789400000	3854500000	707720000	1547300000	2845600000	1403000000	2325700000	3382300000	17543000000	846560000	28229000000	25543000000	2415100000	3629200000	2330000000	1104400000	3340200000	6617100000	111110000	9738900000	1606700000	14329000000	4229300000	18962000000	15388000000	3967800000
Q01484	4	Ankyrin-2	ANK2	sp|Q01484|ANK2_HUMAN Ankyrin-2 OS=Homo sapiens OX=9606 GN=ANK2 PE=1 SV=4	951960000	514730000	3048400000	604890000	1563800000	3085400000	92678000	4022600000	1771800000	9390200000	1437400000	1008200000	5848500000	1495900000	12857000000	9202900000	15315000000	897560000	588280000	11834000000	991040000	18435000000	7253500000	11994000000	14342000000	1624400000	13563000000	14302000000	6853000000	1626600000	1786900000	382510000	4205000000	1115600000	1942900000	334060000	2982500000	631480000	3133700000	2677900000	2813900000	16782000000	9442900000	4687400000	6264900000
Q9C040;Q9C040-2;A0A0J9YX34	8	Tripartite motif-containing protein 2	TRIM2	sp|Q9C040|TRIM2_HUMAN Tripartite motif-containing protein 2 OS=Homo sapiens OX=9606 GN=TRIM2 PE=1 SV=1;sp|Q9C040-2|TRIM2-2_HUMAN Isoform of Q9C040, Isoform 2 of Tripartite motif-containing protein 2 OS=Homo sapiens OX=9606 GN=TRIM2 PE=1 SV=1;tr|A0A0J9YX34|	5744200000	4364800000	6028000000	10376000000	2127100000	6256200000	9816600	7012800000	4253200000	7233200000	3264400000	1958100000	11561000000	2053500000	4300500000	8038200000	3264600000	2177200000	4944300000	5251400000	2277500000	3300200000	4700800000	9668700000	17640000000	741130000	10995000000	16614000000	2769700000	599160000	2756800000	422370000	4905500000	3532300000	3486400000	3760300000	2378400000	2780900000	5166800000	5222000000	7223600000	7986900000	13384000000	4395200000	5192400000
P53041;H0YDU8;A8MU39	3	Serine/threonine-protein phosphatase 5;Serine/threonine-protein phosphatase	PPP5C	sp|P53041|PPP5_HUMAN Serine/threonine-protein phosphatase 5 OS=Homo sapiens OX=9606 GN=PPP5C PE=1 SV=1;tr|H0YDU8|H0YDU8_HUMAN Isoform of P53041, Serine/threonine-protein phosphatase (Fragment) OS=Homo sapiens OX=9606 GN=PPP5C PE=1 SV=1;tr|A8MU39|A8MU39_HUM	2213600000	5319900000	3945500000	2960300000	2792900000	11628000000	211360000	5331100000	3607700000	7657700000	6029300000	1823600000	12537000000	2023600000	9433300000	8981700000	11637000000	1445100000	3352300000	6062700000	1395100000	4459800000	7141900000	7957000000	8364200000	3633700000	5867700000	14864000000	4272100000	1451400000	6025300000	999980000	2909100000	4371400000	2761200000	2717900000	1780800000	1532700000	5192300000	2812900000	3466200000	3792400000	15059000000	8530900000	8430400000
Q08380	10	Galectin-3-binding protein	LGALS3BP	sp|Q08380|LG3BP_HUMAN Galectin-3-binding protein OS=Homo sapiens OX=9606 GN=LGALS3BP PE=1 SV=1	1491200000	1864800000	2015700000	2718700000	1447900000	16169000000	2878900000	3546700000	1231200000	1304800000	1698700000	677560000	4215700000	910530000	3468800000	1883000000	5683000000	1385700000	3013700000	6592400000	726440000	1236300000	659120000	4419800000	1637600000	1823300000	5648200000	9423100000	451920000	23347000000	14090000000	2605400000	4008400000	2358800000	940340000	1980900000	6229700000	2553900000	3361000000	2609100000	10650000000	3198500000	28353000000	8190800000	5139600000
Q13492-3;Q13492-2;Q13492-5;Q13492	14	Phosphatidylinositol-binding clathrin assembly protein	PICALM	sp|Q13492-3|PICAL-3_HUMAN Isoform of Q13492, Isoform 3 of Phosphatidylinositol-binding clathrin assembly protein OS=Homo sapiens OX=9606 GN=PICALM PE=1 SV=2;sp|Q13492-2|PICAL-2_HUMAN Isoform of Q13492, Isoform 2 of Phosphatidylinositol-binding clathrin ass	40771000	234920000	342930000	265330000	51631000	140970000	3923200	467500000	197490000	335310000	128490000	34745000	462300000	24640000	146090000	128300000	15406000	6789900	49257000	102300000	110480000	63811000	79089000	655610000	64412000	40225000	248500000	460930000	10843000	391390000	180170000	14403000	368200000	135600000	22770000	54316000	397390000	25639000	152420000	280030000	141500000000	184430000	513200000	68592000	81566000
Q13835-2;Q13835	2	Plakophilin-1	PKP1	sp|Q13835-2|PKP1-2_HUMAN Isoform of Q13835, Isoform 1 of Plakophilin-1 OS=Homo sapiens OX=9606 GN=PKP1 PE=1 SV=2;sp|Q13835|PKP1_HUMAN Plakophilin-1 OS=Homo sapiens OX=9606 GN=PKP1 PE=1 SV=2	39805000000	1241000000	1692200000	6382600000	403150000	8712800000	827880000	3942400000	1489000000	1811500000	2915200000	155140000	7245300000	1557500000	4124200000	3263700000	809470000	1152000000	1910800000	2858000000	9495000000	4385600000	2663400000	60719000000	11818000000	149540000	2901800000	7600600000	1953900000	1072100000	2886000000	171430000	738660000	181940000	1485100000	287460000	2834100000	586780000	3834500000	3921700000	148890000	26671000000	33170000000	4853000000	1062300000
P14868;P14868-2	7	Aspartate--tRNA ligase, cytoplasmic	DARS	sp|P14868|SYDC_HUMAN Aspartate--tRNA ligase, cytoplasmic OS=Homo sapiens OX=9606 GN=DARS PE=1 SV=2;sp|P14868-2|SYDC-2_HUMAN Isoform of P14868, Isoform 2 of Aspartate--tRNA ligase, cytoplasmic OS=Homo sapiens OX=9606 GN=DARS PE=1 SV=2	2024700000	4603200000	5612300000	3008600000	1293700000	8670500000	902250000	7982700000	3243700000	8633300000	3729300000	759970000	7772900000	1279000000	9226500000	7196100000	9741300000	1951600000	1887100000	3808000000	1977300000	3274300000	6628100000	10090000000	9868100000	2394300000	6663300000	23073000000	4289700000	1802900000	8468400000	877350000	6583000000	3417900000	2326500000	1111400000	3012300000	256850000	3311100000	4830600000	5322100000	4300900000	19421000000	6314100000	11675000000
P54577;A0A0C4DGZ5	2	Tyrosine--tRNA ligase, cytoplasmic;Tyrosine--tRNA ligase, cytoplasmic, N-terminally processed;Tyrosine--tRNA ligase	YARS	sp|P54577|SYYC_HUMAN Tyrosine--tRNA ligase, cytoplasmic OS=Homo sapiens OX=9606 GN=YARS PE=1 SV=4;tr|A0A0C4DGZ5|A0A0C4DGZ5_HUMAN Isoform of P54577, Tyrosine--tRNA ligase OS=Homo sapiens OX=9606 GN=YARS PE=1 SV=1	2896000000	3194500000	2443900000	2550800000	1399600000	14637000000	1681700000	3743600000	5559700000	2589500000	4546300000	1433100000	15860000000	1214700000	3439000000	5386900000	7961600000	905350000	1370300000	2884300000	2011400000	3058100000	3113500000	12136000000	4652900000	922890000	9427900000	13982000000	2841200000	200880000	7345100000	1091600000	3160400000	2949600000	3518300000	910500000	7307500000	1394000000	11080000000	3371300000	9879000000	4394900000	9730600000	3479800000	7382200000
Q8WUM4-2	1	Programmed cell death 6-interacting protein	PDCD6IP	sp|Q8WUM4-2|PDC6I-2_HUMAN Isoform of Q8WUM4, Isoform 2 of Programmed cell death 6-interacting protein OS=Homo sapiens OX=9606 GN=PDCD6IP PE=1 SV=1	9349100000	6432000000	2645300000	5801000000	2437600000	9297300000	245400000	7298800000	3964000000	3141200000	5700000000	1788400000	17874000000	1577800000	4985600000	11438000000	5212400000	1485500000	6223200000	4254900000	15809000000	1925900000	4846500000	15376000000	6854200000	905060000	2121700000	7718900000	1409000000	1224200000	1791800000	292310000	5175700000	4835500000	3012300000	2941700000	3891600000	2416000000	11336000000	3964200000	4044000000	16072000000	14281000000	3170900000	8264700000
Q15075	1	Early endosome antigen 1	EEA1	sp|Q15075|EEA1_HUMAN Early endosome antigen 1 OS=Homo sapiens OX=9606 GN=EEA1 PE=1 SV=2	4219200000	2475300000	1895900000	2480700000	2107800000	4956100000	59563000	3018900000	4479700000	3339600000	2890700000	1578500000	8922600000	1741900000	3842900000	6115100000	7667800000	3064600000	3746200000	8935300000	4819600000	6230100000	7794700000	24367000000	7356900000	430250000	6007600000	9662700000	9521200000	2853200000	2489300000	1117200000	1089900000	1425500000	3908500000	2666800000	2795600000	2171100000	4940100000	2688000000	3617700000	10715000000	20262000000	6307300000	5171700000
Q15643;H0YJ97	4	Thyroid receptor-interacting protein 11	TRIP11	sp|Q15643|TRIPB_HUMAN Thyroid receptor-interacting protein 11 OS=Homo sapiens OX=9606 GN=TRIP11 PE=1 SV=3;tr|H0YJ97|H0YJ97_HUMAN Isoform of Q15643, Thyroid receptor-interacting protein 11 (Fragment) OS=Homo sapiens OX=9606 GN=TRIP11 PE=1 SV=1	94071000	18553000	55206000	24686000000	15665000	19933000	1458100	601220000	18806000	75032000	121620000	16386000	168990000	52496000	127380000	208730000	535020000	112540000	54947000	67573000000	93534000	49066000000	122900000	385540000	1797400000	59605000	125490000	11662000000	36123000	443550000	1069500000	38253000	761590000	21088000000	42627000	52659000	110430000	3104700	216690000	424340000	35017000	149530000	3883600000	14140000000	348520000
P17987;E7ERF2;E7EQR6;F5H282	10	T-complex protein 1 subunit alpha	TCP1	sp|P17987|TCPA_HUMAN T-complex protein 1 subunit alpha OS=Homo sapiens OX=9606 GN=TCP1 PE=1 SV=1;tr|E7ERF2|E7ERF2_HUMAN Isoform of P17987, T-complex protein 1 subunit alpha OS=Homo sapiens OX=9606 GN=TCP1 PE=1 SV=1;tr|E7EQR6|E7EQR6_HUMAN Isoform of P17987,	2900800000	4151400000	3710000000	1760200000	1936000000	4416200000	1177500000	6608800000	2368900000	8665600000	3501900000	1365500000	8642700000	541720000	9006500000	10354000000	8254300000	1574700000	1774200000	6844000000	2912900000	7722800000	13385000000	9536400000	9606600000	1354100000	9358400000	20465000000	4144200000	3765800000	4602800000	912690000	4533800000	2783500000	1698500000	1221500000	4539300000	830580000	10532000000	3661900000	5153800000	8016500000	13771000000	4020900000	9596600000
P12081-4;P12081;B4DDD8;P12081-3;P12081-2;B3KWE1;B4E1C5;E7ETE2	11	Histidine--tRNA ligase, cytoplasmic	HARS	sp|P12081-4|SYHC-4_HUMAN Isoform of P12081, Isoform 4 of Histidine--tRNA ligase, cytoplasmic OS=Homo sapiens OX=9606 GN=HARS PE=1 SV=2;sp|P12081|SYHC_HUMAN Histidine--tRNA ligase, cytoplasmic OS=Homo sapiens OX=9606 GN=HARS PE=1 SV=2;tr|B4DDD8|B4DDD8_HUMAN	22585000000	1530600000	1918300000	4922400000	97077000	18742000000	229430000	4224900000	1298000000	834240000	1757700000	122400000	12781000000	4950800000	799960000	1186900000	1870200000	271840000	3801700000	560240000	1391500000	720840000	761620000	5888200000	4653900000	129330000	19499000000	31517000000	538860000	68042000	2711800000	202410000	18886000000	336330000	3132700000	63738000	3891100000	5641900	6269000000	5626000000	3455900000	4144900000	2368700000	625070000	8825500000
Q9NZR1;G5EA42;Q9NZR1-2	4	Tropomodulin-2	TMOD2	sp|Q9NZR1|TMOD2_HUMAN Tropomodulin-2 OS=Homo sapiens OX=9606 GN=TMOD2 PE=1 SV=1;tr|G5EA42|G5EA42_HUMAN Isoform of Q9NZR1, Tropomodulin 2 (Neuronal), isoform CRA_a OS=Homo sapiens OX=9606 GN=TMOD2 PE=1 SV=1;sp|Q9NZR1-2|TMOD2-2_HUMAN Isoform of Q9NZR1, Isofo	10288000000	2278000000	2292600000	1235800000	1807300000	1150000000	2121300000	3869900000	2096200000	4005500000	3329700000	1149800000	4678400000	1138700000	8660800000	3718100000	10316000000	506900000	890600000	7204300000	1005900000	4986300000	3211400000	7100900000	7184800000	2136700000	11371000000	17561000000	4430200000	4880100000	12829000000	2929000000	3667700000	2463300000	3051500000	1015000000	6502100000	63232000	8536700000	3206300000	15028000000	4733100000	11870000000	9956500000	5905600000
P58107	1	Epiplakin	EPPK1	sp|P58107|EPIPL_HUMAN Epiplakin OS=Homo sapiens OX=9606 GN=EPPK1 PE=1 SV=3	48864000000	551890000	414110000	1367300000	275840000	988410000	107000000	1737100000	2562400000	832750000	288540000	88596000	11460000000	556740000	3324400000	1168000000	17545000000	783690000	595350000	531620000	38732000000	1624400000	752160000	46850000000	15605000000	149240000	4384600000	2492400000	477970000	771310000	1984500000	50410000	156000000	83569000	886170000	80649000	1798700000	325630000	335860000	5476400000	303620000	23530000000	19316000000	7148500000	1593000000
H0YFD6;P40939;A0A2R8Y4F5;A0A2R8YG21	6	Trifunctional enzyme subunit alpha, mitochondrial;Long-chain enoyl-CoA hydratase;Long chain 3-hydroxyacyl-CoA dehydrogenase	HADHA	tr|H0YFD6|H0YFD6_HUMAN Isoform of P40939, Trifunctional enzyme subunit alpha, mitochondrial OS=Homo sapiens OX=9606 GN=HADHA PE=1 SV=2;sp|P40939|ECHA_HUMAN Trifunctional enzyme subunit alpha, mitochondrial OS=Homo sapiens OX=9606 GN=HADHA PE=1 SV=2;tr|A0A2	12391000000	3843100000	1774200000	2496800000	1468800000	4789700000	2565000000	2341300000	2022500000	2217700000	1752800000	595520000	7420000000	667610000	3816800000	10390000000	18308000000	733290000	1606100000	3100100000	6763600000	7832700000	3912400000	7797000000	6834600000	2523200000	5738400000	18699000000	2391600000	7021200000	10671000000	671320000	3493200000	2728900000	852480000	907030000	7795800000	1309700000	4633300000	1790700000	8444600000	9124500000	13121000000	9951500000	2361600000
E7EVA0;P27816-6;P27816;P27816-5	11	Microtubule-associated protein;Microtubule-associated protein 4	MAP4	tr|E7EVA0|E7EVA0_HUMAN Isoform of P27816, Microtubule-associated protein OS=Homo sapiens OX=9606 GN=MAP4 PE=1 SV=1;sp|P27816-6|MAP4-6_HUMAN Isoform of P27816, Isoform 6 of Microtubule-associated protein 4 OS=Homo sapiens OX=9606 GN=MAP4 PE=1 SV=3;sp|P27816	2965300000	833710000	1142600000	1224500000	1566000000	3541400000	43316000	2215100000	350350000	927610000	651740000	235900000	1174000000	548600000	1552400000	1173500000	121980000000	1430900000	1689900000	1780200000	1462200000	1323300000	953180000	3110600000	1014100000	648450000	6666100000	13600000000	486720000	657460000	1741900000	117540000	2452800000	258770000	740650000	1530400000	403450000	1220700000	1203600000	995780000	1753200000	2765100000	9373900000	967710000	2935100000
Q05193-2;A0A0D9SFB1;Q05193-5	4	Isoform of Q05193, Isoform 2 of Dynamin-1	DNM1	sp|Q05193-2|DYN1-2_HUMAN Isoform of Q05193, Isoform 2 of Dynamin-1 OS=Homo sapiens OX=9606 GN=DNM1 PE=1 SV=2;tr|A0A0D9SFB1|A0A0D9SFB1_HUMAN Isoform of Q05193, Dynamin-1 OS=Homo sapiens OX=9606 GN=DNM1 PE=1 SV=1;sp|Q05193-5|DYN1-5_HUMAN Isoform of Q05193, I	217580000	1216900000	354370000	225860000	167510000	640750000	113330000	646600000	990320000	83821000000	758780000	184450000	3051800000	91671000	3100500000	20349000000	284450000	2242300000	1437900000	1427600000	361240000	25620000000	45705000000	10262000000	2268400000	1485700000	1713600000	5154900000	18863000000	291940000	277370000	55335000	1732100000	1232800000	130700000	45718000	532860000	40838000	529480000	139950000	163150000	3588800000	3288000000	1307400000	2229900000
P35612;P35612-4;P35612-3;P35612-2;P35612-9	12	Beta-adducin	ADD2	sp|P35612|ADDB_HUMAN Beta-adducin OS=Homo sapiens OX=9606 GN=ADD2 PE=1 SV=3;sp|P35612-4|ADDB-4_HUMAN Isoform of P35612, Isoform 4 of Beta-adducin OS=Homo sapiens OX=9606 GN=ADD2 PE=1 SV=3;sp|P35612-3|ADDB-3_HUMAN Isoform of P35612, Isoform 3 of Beta-adduci	808070000	3020600000	3132400000	2289500000	1613200000	3242400000	921380000	5606900000	4508200000	4357000000	2984200000	1742000000	15895000000	1015000000	5380800000	3872000000	9251100000	992080000	1028400000	7072200000	880680000	8115000000	3727700000	23807000000	9231000000	383240000	8439600000	11106000000	4552500000	4330100000	10255000000	1909200000	2368800000	2949400000	3049400000	1254900000	5504600000	1072300000	5645000000	3947900000	9318700000	6704400000	8367100000	4408700000	4636000000
Q03252	1	Lamin-B2	LMNB2	sp|Q03252|LMNB2_HUMAN Lamin-B2 OS=Homo sapiens OX=9606 GN=LMNB2 PE=1 SV=4	79817000	48280000	79319000	342360000	6344300	2302300000	5976000000	301630000	54082000	133480000	21149000	8317900	983840000	135590000	737340000	1324100000	13434000000	451430000	14162000	362270000	212490000	741310000	283560000	14533000000	688720000	122570000	85058000	631980000	123720000	3985600000	1096700000	43247000	298300000	39065000	80057000	66048000	318410000	82220000	144040000	50726000	618810000	1818600000	307490000000	1261500000	1990000000
P05023-4;P05023;P05023-3;P05023-2	7	Sodium/potassium-transporting ATPase subunit alpha-1	ATP1A1	sp|P05023-4|AT1A1-4_HUMAN Isoform of P05023, Isoform 4 of Sodium/potassium-transporting ATPase subunit alpha-1 OS=Homo sapiens OX=9606 GN=ATP1A1 PE=1 SV=1;sp|P05023|AT1A1_HUMAN Sodium/potassium-transporting ATPase subunit alpha-1 OS=Homo sapiens OX=9606 GN	343010000	1069300000	473330000	1956500000	1121700000	1874300000	3227100000	3849200000	780520000	4981900000	3722700000	686220000	3290100000	593090000	2744600000	7007100000	5110900000	162370000	410870000	3494700000	1519200000	3221600000	2919000000	7447600000	2236300000	2300900000	4687100000	47686000000	1286900000	24048000000	17822000000	5475800000	959290000	2671800000	1010300000	3659100000	14514000000	4937800000	18408000000	1005100000	9339000000	3715300000	10964000000	10878000000	1377600000
P48163;P48163-2	2	NADP-dependent malic enzyme	ME1	sp|P48163|MAOX_HUMAN NADP-dependent malic enzyme OS=Homo sapiens OX=9606 GN=ME1 PE=1 SV=1;sp|P48163-2|MAOX-2_HUMAN Isoform of P48163, Isoform 2 of NADP-dependent malic enzyme OS=Homo sapiens OX=9606 GN=ME1 PE=1 SV=1	1885600000	1344100000	813380000	1238400000	244230000	7468400000	3693600000	2345700000	1646200000	258300000	1838600000	720050000	5945300000	474370000	1166100000	10797000000	21134000000	1938100000	1554100000	2023900000	907820000	1956300000	1883700000	5823800000	2761500000	3729500000	1896100000	9125500000	1357100000	28370000000	15573000000	1876200000	1405700000	1925500000	693000000	1810000000	4798100000	1927900000	6084800000	1634200000	9136800000	1775800000	9287700000	9738700000	13409000000
Q8WTS6;D6RJA0	4	Histone-lysine N-methyltransferase SETD7	SETD7	sp|Q8WTS6|SETD7_HUMAN Histone-lysine N-methyltransferase SETD7 OS=Homo sapiens OX=9606 GN=SETD7 PE=1 SV=1;tr|D6RJA0|D6RJA0_HUMAN Isoform of Q8WTS6, Histone-lysine N-methyltransferase OS=Homo sapiens OX=9606 GN=SETD7 PE=1 SV=1	616800000	776770000	606900000	2782900000	2581800000	1402200000	3049700000	831920000	3297100000	5980900000	5604100000	179720000	9415100000	2077400000	28062000000	3449000000	52732000000	337290000	5296200000	1915500000	566870000	918820000	690800000	1417800000	28465000000	357100000	2041900000	2507700000	12198000000	5291900000	1501300000	193270000	5356900000	3237000000	3363800000	2334500000	628820000	34475000	4168100000	3185000000	9619200000	902160000	4065600000	1601900000	28345000000
P55084;P55084-2;F5GZQ3;B5MD38	7	Trifunctional enzyme subunit beta, mitochondrial;3-ketoacyl-CoA thiolase	HADHB	sp|P55084|ECHB_HUMAN Trifunctional enzyme subunit beta, mitochondrial OS=Homo sapiens OX=9606 GN=HADHB PE=1 SV=3;sp|P55084-2|ECHB-2_HUMAN Isoform of P55084, Isoform 2 of Trifunctional enzyme subunit beta, mitochondrial OS=Homo sapiens OX=9606 GN=HADHB PE=1	1148600000	1061800000	824810000	1480600000	1662600000	8123900000	4302600000	1330400000	1845600000	3214500000	3076900000	561860000	5051400000	1223700000	9520900000	12280000000	29211000000	3159100000	2694900000	8771800000	1130400000	10065000000	9322900000	9108000000	9848800000	1820500000	3878300000	20808000000	6697700000	1854100000	7505300000	420740000	3246200000	2210800000	1998400000	1517000000	2427200000	259860000	1770100000	2276100000	9509100000	25445000000	14172000000	10015000000	8011100000
P49368;P49368-2;B4DUR8	9	T-complex protein 1 subunit gamma	CCT3	sp|P49368|TCPG_HUMAN T-complex protein 1 subunit gamma OS=Homo sapiens OX=9606 GN=CCT3 PE=1 SV=4;sp|P49368-2|TCPG-2_HUMAN Isoform of P49368, Isoform 2 of T-complex protein 1 subunit gamma OS=Homo sapiens OX=9606 GN=CCT3 PE=1 SV=4;tr|B4DUR8|B4DUR8_HUMAN Iso	16114000000	4013300000	3360800000	1852600000	1667800000	4063300000	708060000	5042200000	3363400000	7955000000	3484300000	1419300000	4814100000	489940000	6382400000	7818800000	4411400000	1286600000	1274000000	4343800000	1987300000	7465600000	10911000000	10237000000	8541200000	1492700000	9221700000	18384000000	2860000000	18467000000	3080000000	597530000	4689000000	6019400000	1559600000	1058300000	3359700000	949360000	6631000000	4754700000	3997100000	11074000000	11882000000	4212900000	6419400000
P07814;V9GYZ6	3	Bifunctional glutamate/proline--tRNA ligase;Glutamate--tRNA ligase;Proline--tRNA ligase	EPRS	sp|P07814|SYEP_HUMAN Bifunctional glutamate/proline--tRNA ligase OS=Homo sapiens OX=9606 GN=EPRS PE=1 SV=5;tr|V9GYZ6|V9GYZ6_HUMAN Isoform of P07814, Bifunctional glutamate/proline--tRNA ligase (Fragment) OS=Homo sapiens OX=9606 GN=EPRS PE=1 SV=1	6713400000	2071700000	3512200000	1940400000	963440000	5478400000	998270000	5305500000	2857900000	7740500000	2499700000	807300000	9674100000	656470000	5514000000	3719900000	7210000000	669090000	430720000	2555300000	2353800000	2241600000	7481600000	8985200000	3371800000	2392400000	7220700000	8667400000	2132900000	5313900000	15438000000	2381600000	4702200000	2779700000	1946000000	1497700000	8107700000	2041500000	6902100000	1706800000	9124400000	25274000000	11945000000	7792600000	3870900000
Q92599;A6NMH6;Q92599-2;Q92599-4;Q92599-3	7	Septin-8	SEPTIN8	sp|Q92599|SEPT8_HUMAN Septin-8 OS=Homo sapiens OX=9606 GN=SEPT8 PE=1 SV=4;tr|A6NMH6|A6NMH6_HUMAN Isoform of Q92599, Septin 8 OS=Homo sapiens OX=9606 GN=SEPTIN8 PE=1 SV=1;sp|Q92599-2|SEPT8-2_HUMAN Isoform of Q92599, Isoform 2 of Septin-8 OS=Homo sapiens OX=	910800000	2670000000	3152400000	578930000	1038400000	4471800000	2711100000	4386900000	2183100000	3434000000	2576400000	663290000	7437300000	586560000	6383000000	7241500000	27091000000	2315800000	1799700000	4659500000	3235100000	4425400000	3283500000	12880000000	10555000000	1202400000	6185100000	12708000000	4045600000	3154400000	10882000000	458380000	6054000000	3513000000	1363000000	1106100000	3391200000	144140000	7468400000	2429600000	5300500000	6214500000	12859000000	6349100000	8913400000
P10155;P10155-3;P10155-5;P10155-4	9	60 kDa SS-A/Ro ribonucleoprotein	TROVE2	sp|P10155|RO60_HUMAN 60 kDa SS-A/Ro ribonucleoprotein OS=Homo sapiens OX=9606 GN=RO60 PE=1 SV=2;sp|P10155-3|RO60-3_HUMAN Isoform of P10155, Isoform 3 of 60 kDa SS-A/Ro ribonucleoprotein OS=Homo sapiens OX=9606 GN=RO60 PE=1 SV=2;sp|P10155-5|RO60-5_HUMAN Iso	1799000000	2430400000	2843600000	1555400000	997400000	5778500000	4462800000	3753400000	1491700000	1745600000	2685100000	592850000	4394600000	617030000	3462900000	1387800000	7949600000	520280000	840540000	3087600000	1574000000	430050000	1534300000	5069800000	2388700000	1873900000	5718600000	14545000000	534560000	22430000000	23009000000	3093000000	4107700000	2808000000	1383900000	1937800000	7854500000	1134800000	9002400000	1495500000	18571000000	1883300000	19515000000	10839000000	3947200000
Q9NR28;Q9NR28-2;A0A024RBT2;Q9NR28-3	6	Diablo homolog, mitochondrial	DIABLO	sp|Q9NR28|DBLOH_HUMAN Diablo homolog, mitochondrial OS=Homo sapiens OX=9606 GN=DIABLO PE=1 SV=1;sp|Q9NR28-2|DBLOH-2_HUMAN Isoform of Q9NR28, Isoform 2 of Diablo homolog, mitochondrial OS=Homo sapiens OX=9606 GN=DIABLO PE=1 SV=1;tr|A0A024RBT2|A0A024RBT2_HUM	663320000	1113300000	554700000	1635700000	780490000	12425000000	8724900000	3244400000	986770000	1011400000	2274700000	315200000	2517000000	735280000	5704000000	2709100000	13107000000	1504300000	527310000	2505300000	1370100000	1273700000	1024300000	4483100000	2268700000	1506300000	9104900000	16450000000	1365100000	11537000000	11651000000	1690400000	5391700000	1430200000	868250000	1064200000	7899700000	43721000	11799000000	957810000	10016000000	4340100000	14231000000	15582000000	2946100000
O14818;O14818-4	3	Proteasome subunit alpha type-7	PSMA7	sp|O14818|PSA7_HUMAN Proteasome subunit alpha type-7 OS=Homo sapiens OX=9606 GN=PSMA7 PE=1 SV=1;sp|O14818-4|PSA7-4_HUMAN Isoform of O14818, Isoform 3 of Proteasome subunit alpha type-7 OS=Homo sapiens OX=9606 GN=PSMA7 PE=1 SV=1	8813400000	3517000000	2377200000	3905800000	1072700000	6104700000	2236500000	5279500000	2435700000	2202000000	2138600000	634460000	9803600000	868320000	2789000000	5406200000	6855500000	4389200000	1959700000	4437400000	5032700000	3442900000	3855800000	8057700000	7526700000	475350000	5131300000	10844000000	3445500000	6027100000	6410900000	433100000	3872300000	2977500000	2159600000	2173000000	1638800000	127180000	4074700000	3466700000	4180400000	5729600000	15500000000	5954700000	13448000000
Q92783-2;Q92783;A6NMU3	4	Signal transducing adapter molecule 1	STAM	sp|Q92783-2|STAM1-2_HUMAN Isoform of Q92783, Isoform 2 of Signal transducing adapter molecule 1 OS=Homo sapiens OX=9606 GN=STAM PE=1 SV=3;sp|Q92783|STAM1_HUMAN Signal transducing adapter molecule 1 OS=Homo sapiens OX=9606 GN=STAM PE=1 SV=3;tr|A6NMU3|A6NMU3	1738200000	1326900000	1149700000	922460000	1094900000	1003800000	2694200	1317200000	1056800000	6605300000	20174000000	593530000	3066300000	586500000	48723000000	3103300000	851440000	140790000	1880500000	1166900000	476380000	75769000	2447100000	3064200000	1642100000	355310000	1165000000	1550100000	1073400000	231910000	804290000	67679000	1104200000	844440000	1206400000	462190000	656740000	454920000	87577000000	1065300000	1075700000	24061000000	3117600000	320860000	1716900000
Q99536;Q99536-3;Q99536-2	9	Synaptic vesicle membrane protein VAT-1 homolog	VAT1	sp|Q99536|VAT1_HUMAN Synaptic vesicle membrane protein VAT-1 homolog OS=Homo sapiens OX=9606 GN=VAT1 PE=1 SV=2;sp|Q99536-3|VAT1-3_HUMAN Isoform of Q99536, Isoform 3 of Synaptic vesicle membrane protein VAT-1 homolog OS=Homo sapiens OX=9606 GN=VAT1 PE=1 SV=	3388300000	2158400000	3647600000	2113600000	902030000	7946600000	2650100000	2739800000	1564600000	1928200000	1884600000	489270000	6572800000	793630000	4090900000	3936400000	5411400000	3021200000	1573800000	3639600000	1819500000	3131700000	1225000000	4143200000	1468700000	2856400000	2633700000	44311000000	634160000	2785000000	12773000000	843650000	8618700000	1786500000	2094900000	2426100000	4740200000	207210000	2232300000	1607900000	8832500000	1063700000	11614000000	4031100000	1870600000
Q9NTJ4-2;Q9NTJ4;Q9NTJ4-4	11	Alpha-mannosidase 2C1	MAN2C1	sp|Q9NTJ4-2|MA2C1-2_HUMAN Isoform of Q9NTJ4, Isoform 2 of Alpha-mannosidase 2C1 OS=Homo sapiens OX=9606 GN=MAN2C1 PE=1 SV=1;sp|Q9NTJ4|MA2C1_HUMAN Alpha-mannosidase 2C1 OS=Homo sapiens OX=9606 GN=MAN2C1 PE=1 SV=1;sp|Q9NTJ4-4|MA2C1-4_HUMAN Isoform of Q9NTJ4,	4855400000	1076800000	1259300000	1543300000	573040000	6446900000	210120000	3253400000	1287300000	1983200000	1870900000	1165800000	5025900000	1002600000	2210100000	2842600000	3988600000	3009000000	557390000	5690800000	1087800000	1984700000	2406200000	3628200000	2068400000	1447000000	5131900000	9938300000	1038900000	22824000000	16733000000	3171000000	2975500000	2212700000	1419500000	2807800000	15512000000	3247800000	8659700000	1402600000	9836600000	6128000000	18159000000	17918000000	2437600000
P50213;P50213-2;H0YL72;H0YMU3;H0YLI6	8	Isocitrate dehydrogenase [NAD] subunit alpha, mitochondrial	IDH3A	sp|P50213|IDH3A_HUMAN Isocitrate dehydrogenase [NAD] subunit alpha, mitochondrial OS=Homo sapiens OX=9606 GN=IDH3A PE=1 SV=1;sp|P50213-2|IDH3A-2_HUMAN Isoform of P50213, Isoform 2 of Isocitrate dehydrogenase [NAD] subunit alpha, mitochondrial OS=Homo sapie	1264600000	3697400000	2031600000	2762300000	1546700000	7578100000	4050900000	5528900000	3232400000	2015100000	3781000000	604430000	19353000000	609630000	3097300000	10329000000	34422000000	1730200000	1939100000	4985300000	2740600000	4412000000	3770700000	6013400000	3768700000	676340000	6868700000	17091000000	3359100000	776140000	12779000000	2696800000	3544300000	2903100000	1790800000	1677100000	6531900000	135170000	5821100000	3284900000	14319000000	1877500000	12356000000	4234500000	7030000000
O43681;A0A087WXS7;K7ERW9	3	ATPase ASNA1	ASNA1	sp|O43681|ASNA_HUMAN ATPase ASNA1 OS=Homo sapiens OX=9606 GN=ASNA1 PE=1 SV=2;tr|A0A087WXS7|A0A087WXS7_HUMAN Isoform of O43681, ATPase ASNA1 OS=Homo sapiens OX=9606 GN=ASNA1 PE=1 SV=1;tr|K7ERW9|K7ERW9_HUMAN Isoform of O43681, Arsenical pump-driving ATPase (	297570000	3718500000	6014300000	3548300000	3025100000	766910000	1569500000	8313300000	9284300000	11842000000	7159200000	1411000000	6535700000	277410000	4723500000	18031000000	13989000000	162980000	2782600000	1184400000	359860000	9562300000	11319000000	3144400000	2231400000	358680000	11848000000	18992000000	13278000000	217650000	6931400000	713900000	10205000000	674590000	2157600000	959740000	493510000	8420300	2101200000	8017100000	4391600000	1540300000	3246200000	1069500000	5508500000
Q08722;A0A2R8Y484;Q08722-2;Q08722-3;Q08722-4	6	Leukocyte surface antigen CD47	CD47	sp|Q08722|CD47_HUMAN Leukocyte surface antigen CD47 OS=Homo sapiens OX=9606 GN=CD47 PE=1 SV=1;tr|A0A2R8Y484|A0A2R8Y484_HUMAN Isoform of Q08722, Leukocyte surface antigen CD47 (Fragment) OS=Homo sapiens OX=9606 GN=CD47 PE=1 SV=1;sp|Q08722-2|CD47-2_HUMAN Iso	0	0	6617500	118650000	36619000	39212000	92273000	3087200	7508200	138110000	205530000	6658500	34616000	255890	173350000	656060000	172660000	7165100	0	141540000	0	181350000	37190000	464390000	35723000	213820000	55762000	206060000000	0	511220000	448330000	128610000	7502200	234620000	29469000	13452000	453640000	1045000	43364000	450520000	585860000	44592000	286150000	1893200000	88507000000
P46976-2;P46976;C9JQ42;G5E9W8	6	Glycogenin-1	GYG1	sp|P46976-2|GLYG-2_HUMAN Isoform of P46976, Isoform GN-1 of Glycogenin-1 OS=Homo sapiens OX=9606 GN=GYG1 PE=1 SV=4;sp|P46976|GLYG_HUMAN Glycogenin-1 OS=Homo sapiens OX=9606 GN=GYG1 PE=1 SV=4;tr|C9JQ42|C9JQ42_HUMAN Isoform of P46976, Glycogenin-1 (Fragment)	1500700000	3021100000	2404500000	2771600000	1427400000	9400700000	3372100000	3482600000	2022400000	1590200000	2921600000	636380000	5018100000	982000000	3355600000	3333500000	13543000000	2075300000	1227700000	3365700000	1056900000	935060000	2633100000	6022000000	3557900000	2242400000	6346800000	12543000000	1458700000	4499600000	12412000000	2290400000	7028400000	2691800000	2235800000	2525000000	5468600000	132510000	6660900000	2555600000	11835000000	3234500000	17198000000	7867700000	5773300000
P53814-6;A0A087X1R1;P53814-5;P53814	9	Smoothelin	SMTN	sp|P53814-6|SMTN-6_HUMAN Isoform of P53814, Isoform B3 of Smoothelin OS=Homo sapiens OX=9606 GN=SMTN PE=1 SV=7;tr|A0A087X1R1|A0A087X1R1_HUMAN Isoform of P53814, Smoothelin OS=Homo sapiens OX=9606 GN=SMTN PE=1 SV=1;sp|P53814-5|SMTN-5_HUMAN Isoform of P53814	7888500000	3119500000	142740000	27694000	261070000	262610000	3806800000	8795800000	11441000000	15355000	3621400000	38155000	5995600000	104750000	124450000	213090000	134380000	69200000	5101300000	29303000000	5859700000	90713000	424270000	604130000	402360000	11617000	15011000000	33466000000	17311000000	4601800000	3733400000	102940000	3671700000	3141300000	5613100000	5863800	2318900000	3769700000	170730000	4083500000	138840000	27843000000	7529600000	212970000	15494000000
P47929	1	Galectin-7	LGALS7	sp|P47929|LEG7_HUMAN Galectin-7 OS=Homo sapiens OX=9606 GN=LGALS7B PE=1 SV=2	56981000000	1910700000	920750000	3870800000	236570000	3213500000	496880000	968900000	454430000	199660000	524390000	51881000	2387700000	1146700000	1081000000	475490000	395350000	629130000	845570000	3969700000	27945000000	3533600000	875280000	87271000000	13808000000	39719000	267710000	1598400000	336460000	401680000	640350000	125220000	163330000	91214000	447720000	112950000	810910000	34979000	484860000	1615800000	73320000	12601000000	29441000000	2687100000	526610000
Q9Y6R7;A0A087WXI2	4	IgGFc-binding protein	FCGBP	sp|Q9Y6R7|FCGBP_HUMAN IgGFc-binding protein OS=Homo sapiens OX=9606 GN=FCGBP PE=1 SV=3;tr|A0A087WXI2|A0A087WXI2_HUMAN Isoform of Q9Y6R7, IgGFc-binding protein (Fragment) OS=Homo sapiens OX=9606 GN=FCGBP PE=1 SV=2	2808200000	849090000	3378900000	4945300000	564590000	1598200000	728290000	5471800000	3370200000	1787300000	12686000000	3578100000	14607000000	1084600000	930770000	1217800000	2340300000	3777600000	351250000	3221400000	477890000	925020000	738820000	2265400000	850560000	89957000	7420800000	3590700000	264760000	39551000000	1342100000	1212000000	2727700000	1510700000	1372400000	1805000000	506590000	1359900000	2160900000	3763000000	2476800000	2831000000	46639000000	7071000000	3643800000
O43813;E9PHS0	4	LanC-like protein 1	LANCL1	sp|O43813|LANC1_HUMAN Glutathione S-transferase LANCL1 OS=Homo sapiens OX=9606 GN=LANCL1 PE=1 SV=1;tr|E9PHS0|E9PHS0_HUMAN Isoform of O43813, Glutathione S-transferase LANCL1 (Fragment) OS=Homo sapiens OX=9606 GN=LANCL1 PE=1 SV=1	1780900000	1973100000	2604000000	1488800000	1321400000	4347800000	1030200000	3674500000	1722600000	4553600000	2402800000	761840000	6769000000	628930000	4647400000	2860600000	11651000000	576810000	880950000	3630400000	1732900000	2476300000	3663700000	4529300000	4181600000	1460900000	5448200000	11590000000	1130000000	8387400000	12078000000	3176600000	3830200000	1812900000	2077500000	2868700000	9061900000	53167000	12228000000	2304000000	17152000000	3855500000	12915000000	3703300000	3885500000
Q8WXG9	10	G-protein coupled receptor 98	GPR98	sp|Q8WXG9|AGRV1_HUMAN Adhesion G-protein coupled receptor V1 OS=Homo sapiens OX=9606 GN=ADGRV1 PE=1 SV=2	155090000	83513000	154950000	28254000	20655000	752640000	40408000	17440000000	11149000000	77694000	77933000	5823700	1148400000	11054000	499700000	269330000	394180000	126220000	20723000	282630000	177630000	244180000	218810000	279610000	346010000	196680000	373660000	495550000	75261000	188520000	5073500000	170810000	263740000000	24481000	57605000	58595000	96096000	7943700	137580000	60146000	125170000	1401800000	1509100000	3390700000	3716300000
Q9UHD8;Q9UHD8-5;Q9UHD8-2;Q9UHD8-7;Q9UHD8-3;Q9UHD8-9;Q9UHD8-4	25	Septin-9	SEPTIN9	sp|Q9UHD8|SEPT9_HUMAN Septin-9 OS=Homo sapiens OX=9606 GN=SEPT9 PE=1 SV=2;sp|Q9UHD8-5|SEPT9-5_HUMAN Isoform of Q9UHD8, Isoform 5 of Septin-9 OS=Homo sapiens OX=9606 GN=SEPT9 PE=1 SV=2;sp|Q9UHD8-2|SEPT9-2_HUMAN Isoform of Q9UHD8, Isoform 2 of Septin-9 OS=Ho	700610000	2100300000	2990300000	712400000	1462000000	2274700000	1418000000	2726300000	2118600000	4487000000	1993400000	506340000	4121700000	584310000	7545400000	4472300000	15828000000	1776100000	10334000000	2651200000	1184100000	2601700000	2139500000	17649000000	22277000000	2558100000	4985400000	11456000000	2540700000	3033100000	9107800000	311690000	6987200000	2428100000	1159300000	850060000	2794800000	202600000	4337700000	2201700000	5261700000	5086600000	9269900000	4566000000	16814000000
O95352;O95352-2;O95352-3	14	Ubiquitin-like modifier-activating enzyme ATG7	ATG7	sp|O95352|ATG7_HUMAN Ubiquitin-like modifier-activating enzyme ATG7 OS=Homo sapiens OX=9606 GN=ATG7 PE=1 SV=1;sp|O95352-2|ATG7-2_HUMAN Isoform of O95352, Isoform 2 of Ubiquitin-like modifier-activating enzyme ATG7 OS=Homo sapiens OX=9606 GN=ATG7 PE=1 SV=1;	5008900000	3563400000	2450600000	3366100000	1809500000	6998000000	590540000	4324600000	2892800000	3515800000	3426800000	1404100000	13900000000	1304300000	2331800000	4120400000	2154500000	509300000	1585300000	3680000000	2261200000	3810900000	3249200000	9027000000	4415800000	887310000	5594600000	8907500000	1260700000	8100500000	9701300000	1192100000	2670800000	4794000000	2609800000	2910500000	5036000000	3974200000	6860100000	2983700000	8185900000	7849700000	21052000000	8878100000	4337500000
P07355-2;P07355;H0YN42;H0YMU9;H0YMD0;H0YM50;H0YKS4;H0YNP5	20	Annexin A2;Annexin	ANXA2	sp|P07355-2|ANXA2-2_HUMAN Isoform of P07355, Isoform 2 of Annexin A2 OS=Homo sapiens OX=9606 GN=ANXA2 PE=1 SV=2;sp|P07355|ANXA2_HUMAN Annexin A2 OS=Homo sapiens OX=9606 GN=ANXA2 PE=1 SV=2;tr|H0YN42|H0YN42_HUMAN Isoform of P07355, Annexin (Fragment) OS=Homo	108270000000	837130000	2137400000	4519600000	273070000	2014800000	384380000	1400000000	578590000	746580000	1191200000	321050000	6975100000	864620000	3249100000	2373100000	1029100000	1589400000	1659400000	2418700000	16986000000	3023600000	1547400000	35791000000	7629000000	209340000	1495100000	3944000000	1283500000	1327600000	1066700000	242410000	688830000	460960000	1247300000	313460000	910460000	531760000	1706000000	2640000000	511830000	14645000000	20941000000	6055300000	1529000000
Q13561;Q13561-3;Q13561-2;F8W1I6;H0YI98;F8VW18	10	Dynactin subunit 2	DCTN2	sp|Q13561|DCTN2_HUMAN Dynactin subunit 2 OS=Homo sapiens OX=9606 GN=DCTN2 PE=1 SV=4;sp|Q13561-3|DCTN2-3_HUMAN Isoform of Q13561, Isoform 3 of Dynactin subunit 2 OS=Homo sapiens OX=9606 GN=DCTN2 PE=1 SV=4;sp|Q13561-2|DCTN2-2_HUMAN Isoform of Q13561, Isoform	678970000	1579100000	4457700000	655930000	1560400000	1919400000	776240000	6890300000	1943800000	15375000000	3428800000	1001900000	2480500000	602970000	11585000000	8489900000	7947200000	1119400000	454460000	6887300000	14999000000	4540200000	11642000000	7774600000	12455000000	1600400000	11681000000	17525000000	5481200000	981750000	2704900000	361010000	3202900000	1164600000	3036200000	265630000	2237200000	13619000	4035300000	2850000000	2267100000	9093000000	5595700000	6016800000	4869400000
Q02153;A0A494C1B9;Q02153-2;Q02153-3;B7Z685	5	Guanylate cyclase soluble subunit beta-1	GUCY1B3	sp|Q02153|GCYB1_HUMAN Guanylate cyclase soluble subunit beta-1 OS=Homo sapiens OX=9606 GN=GUCY1B1 PE=1 SV=1;tr|A0A494C1B9|A0A494C1B9_HUMAN Isoform of Q02153, Guanylate cyclase soluble subunit beta-1 OS=Homo sapiens OX=9606 GN=GUCY1B1 PE=4 SV=1;sp|Q02153-2|	1485300000	2195900000	2545000000	2456300000	1377300000	3119700000	359160000	5455300000	1884300000	5017900000	3072900000	1518800000	9387700000	1041000000	6384500000	3266600000	2596000000	308340000	943620000	4769000000	1119700000	3682300000	4901500000	7763700000	4269200000	358770000	4966200000	9393600000	2592200000	5187900000	15908000000	3108400000	967270000	3201100000	2752300000	2313400000	11160000000	4403700000	9829300000	2739400000	10334000000	10488000000	13905000000	8783100000	3391800000
P11137-3;P11137	4	Microtubule-associated protein 2	MAP2	sp|P11137-3|MTAP2-3_HUMAN Isoform of P11137, Isoform 3 of Microtubule-associated protein 2 OS=Homo sapiens OX=9606 GN=MAP2 PE=1 SV=4;sp|P11137|MTAP2_HUMAN Microtubule-associated protein 2 OS=Homo sapiens OX=9606 GN=MAP2 PE=1 SV=4	573660000	1554200000	4898200000	760090000	1390200000	1379000000	16452000	7147700000	1788800000	33499000000	2333700000	1327800000	2866900000	187870000	7530700000	5188300000	536870000	1544700000	4328900000	2997000000	3142800000	1086500000	30627000000	15918000000	7257600000	52521000	6949700000	10337000000	9531900000	277620000	694820000	189290000	398050000	289900000	2543200000	176740000	771310000	582290000	2561500000	4012500000	1015000000	10276000000	5505200000	265040000	6283500000
P07437;Q5JP53;Q5ST81	4	Tubulin beta chain	TUBB	sp|P07437|TBB5_HUMAN Tubulin beta chain OS=Homo sapiens OX=9606 GN=TUBB PE=1 SV=2;tr|Q5JP53|Q5JP53_HUMAN Isoform of P07437, Tubulin beta chain OS=Homo sapiens OX=9606 GN=TUBB PE=1 SV=1;tr|Q5ST81|Q5ST81_HUMAN Isoform of P07437, Tubulin beta chain OS=Homo sa	789180000	504130000	7710500000	233250000	633110000	976070000	41392000	5440100000	335880000	13582000000	4152700000	646720000	1100800000	222310000	38181000000	3485200000	500840000	64246000	189770000	936690000	1852400000	673040000	3633000000	3182500000	6206500000	869570000	5006600000	17781000000	1537100000	976500000	2409200000	421830000	1954700000	644450000	657130000	408080000	8613200000	21617000	19493000000	1979200000	7238100000	5629000000	7765700000	1620900000	946330000
P61160;F5H6T1	4	Actin-related protein 2	ACTR2	sp|P61160|ARP2_HUMAN Actin-related protein 2 OS=Homo sapiens OX=9606 GN=ACTR2 PE=1 SV=1;tr|F5H6T1|F5H6T1_HUMAN Isoform of P61160, Actin-related protein 2 OS=Homo sapiens OX=9606 GN=ACTR2 PE=1 SV=2	1820500000	3573600000	2984100000	1648000000	872070000	4510200000	2248000000	3729400000	2300300000	4019200000	3032500000	735980000	11038000000	577340000	3573200000	3877700000	9687800000	657270000	1183500000	3689100000	1669000000	3488300000	2922600000	7279900000	4049100000	1161400000	5848400000	9628000000	2084300000	9939400000	20234000000	2878500000	4596400000	2852500000	2512100000	1151800000	6603900000	163450000	8444400000	3040600000	14137000000	2186200000	11051000000	5277400000	3288900000
Q7L5N1;E7EM64	3	COP9 signalosome complex subunit 6	COPS6	sp|Q7L5N1|CSN6_HUMAN COP9 signalosome complex subunit 6 OS=Homo sapiens OX=9606 GN=COPS6 PE=1 SV=1;tr|E7EM64|E7EM64_HUMAN Isoform of Q7L5N1, COP9 signalosome complex subunit 6 OS=Homo sapiens OX=9606 GN=COPS6 PE=1 SV=1	1236600000	3191700000	3410700000	1630100000	1752100000	9081000000	891730000	3662900000	2282300000	4486000000	3049800000	808100000	5293700000	1088400000	7348300000	4741400000	5408200000	1185700000	1449200000	8609700000	1257100000	3487900000	4048700000	4637800000	6656600000	994920000	9218600000	9174700000	3583700000	2211100000	9983700000	1581400000	6563200000	2452800000	3091800000	1609000000	3235600000	64288000	5884500000	2207400000	8169700000	3725600000	10247000000	6759000000	5492200000
Q6XQN6;G5E977;Q6XQN6-2;Q6XQN6-3;C9J8U2	8	Nicotinate phosphoribosyltransferase	NAPRT	sp|Q6XQN6|PNCB_HUMAN Nicotinate phosphoribosyltransferase OS=Homo sapiens OX=9606 GN=NAPRT PE=1 SV=2;tr|G5E977|G5E977_HUMAN Isoform of Q6XQN6, Nicotinate phosphoribosyltransferase OS=Homo sapiens OX=9606 GN=NAPRT PE=1 SV=1;sp|Q6XQN6-2|PNCB-2_HUMAN Isoform	522220000	1239400000	2421100000	1720700000	317720000	1322000000	2034600000	2112900000	2270400000	1703700000	1666700000	507400000	6805000000	858260000	2635300000	3088400000	3531200000	596420000	1108800000	5005800000	1345700000	3063900000	2343400000	3098700000	2944500000	786250000	3722800000	4530500000	1341100000	14536000000	22737000000	3652300000	4114300000	1448200000	1122000000	1069900000	6034400000	205260000	8515000000	1266500000	18245000000	3190800000	16793000000	8917400000	3095000000
P48643;E7ENZ3;B7ZAR1;E9PCA1;P48643-2	7	T-complex protein 1 subunit epsilon	CCT5	sp|P48643|TCPE_HUMAN T-complex protein 1 subunit epsilon OS=Homo sapiens OX=9606 GN=CCT5 PE=1 SV=1;tr|E7ENZ3|E7ENZ3_HUMAN Isoform of P48643, T-complex protein 1 subunit epsilon OS=Homo sapiens OX=9606 GN=CCT5 PE=1 SV=1;tr|B7ZAR1|B7ZAR1_HUMAN Isoform of P48	1590700000	3040300000	3862300000	1516100000	1059100000	6010800000	1273200000	4344200000	2560700000	5527900000	2223100000	939030000	7720200000	535210000	6285700000	6465900000	5712500000	1339500000	1687100000	5631300000	1585200000	5275900000	8053000000	10052000000	7262600000	2407600000	7484000000	15129000000	3277900000	8373300000	5134200000	879270000	6089700000	2695200000	1593200000	1219900000	2245500000	868400000	5203800000	2482600000	4510500000	5522100000	12157000000	5620000000	5583500000
Q9UBW8;F5GYF7;F5H248;F5H7C6	9	COP9 signalosome complex subunit 7a	COPS7A	sp|Q9UBW8|CSN7A_HUMAN COP9 signalosome complex subunit 7a OS=Homo sapiens OX=9606 GN=COPS7A PE=1 SV=1;tr|F5GYF7|F5GYF7_HUMAN Isoform of Q9UBW8, COP9 signalosome complex subunit 7a (Fragment) OS=Homo sapiens OX=9606 GN=COPS7A PE=1 SV=8;tr|F5H248|F5H248_HUMA	2218000000	2496800000	2427500000	2617000000	1624900000	5092800000	817310000	4469600000	2782500000	3521800000	3471200000	529210000	5277800000	1092800000	4403800000	5470800000	7845500000	2159200000	1105100000	5524800000	1796600000	4195100000	6175300000	3698000000	4079100000	741600000	6989200000	7041000000	3781700000	2662100000	6184600000	1302000000	3321000000	2344700000	2967300000	1784700000	4086500000	27002000	11852000000	2126000000	4939800000	8859100000	12453000000	4104700000	6268900000
P20340	4	Ras-related protein Rab-6A	RAB6A	sp|P20340|RAB6A_HUMAN Ras-related protein Rab-6A OS=Homo sapiens OX=9606 GN=RAB6A PE=1 SV=3	1313500000	4822000000	2138600000	5569500000	646950000	5483200000	788650000	5688300000	2807100000	1765700000	3490200000	443950000	7312900000	1100100000	2215800000	4057600000	14454000000	6753800000	2149500000	4951700000	3015100000	5313400000	7879300000	8596600000	4671900000	552370000	8490900000	4451700000	3347100000	1691800000	4505900000	421980000	4335900000	3288800000	1405500000	1592600000	1979900000	151140000	2755400000	3804700000	7334400000	3148200000	10503000000	3216300000	14293000000
Q92905	6	COP9 signalosome complex subunit 5	COPS5	sp|Q92905|CSN5_HUMAN COP9 signalosome complex subunit 5 OS=Homo sapiens OX=9606 GN=COPS5 PE=1 SV=4	2111100000	4055600000	3579800000	1754700000	1752400000	6265900000	638040000	4293800000	2638000000	3974900000	2655400000	1265600000	5486800000	1504100000	5284500000	4559200000	8348300000	1009600000	1554300000	6175200000	1161700000	3690500000	3087000000	5179200000	4795600000	1284600000	6934800000	18420000000	3051400000	3537200000	9459800000	1513900000	4488800000	2693100000	3050000000	1367600000	4217600000	564240000	5379300000	2383500000	9081900000	3507500000	9913100000	4396500000	4986800000
O75116;E9PF63;Q14DU5	5	Rho-associated protein kinase 2	ROCK2	sp|O75116|ROCK2_HUMAN Rho-associated protein kinase 2 OS=Homo sapiens OX=9606 GN=ROCK2 PE=1 SV=4;tr|E9PF63|E9PF63_HUMAN Isoform of O75116, Rho-associated protein kinase 2 OS=Homo sapiens OX=9606 GN=ROCK2 PE=1 SV=1;tr|Q14DU5|Q14DU5_HUMAN Isoform of O75116,	3764300000	2990700000	3304600000	1850300000	1864700000	3290100000	50096000	5946900000	2683900000	5174700000	3837600000	1996900000	14117000000	1406900000	6345400000	4515000000	4810300000	1693300000	1504300000	9596400000	1538000000	7013300000	5993500000	16287000000	11716000000	432080000	8512000000	5416400000	6908800000	1015200000	765280000	229300000	1712300000	1159200000	2415100000	1397000000	971030000	1684300000	6798000000	2283400000	1613600000	14519000000	5903700000	1932900000	6673700000
P05026-2;P05026	2	Sodium/potassium-transporting ATPase subunit beta-1	ATP1B1	sp|P05026-2|AT1B1-2_HUMAN Isoform of P05026, Isoform 2 of Sodium/potassium-transporting ATPase subunit beta-1 OS=Homo sapiens OX=9606 GN=ATP1B1 PE=1 SV=1;sp|P05026|AT1B1_HUMAN Sodium/potassium-transporting ATPase subunit beta-1 OS=Homo sapiens OX=9606 GN=A	236950000	1268800000	674980000	1084900000	1067500000	4548900000	4567300000	3517100000	894560000	3474100000	3181400000	298780000	2527500000	194810000	3896400000	4608500000	2885000000	89962000	228200000	3223600000	1942500000	3277200000	992930000	6632500000	1171400000	2063400000	5482900000	39258000000	1534800000	14758000000	21450000000	3431000000	1632200000	1746000000	1293300000	1595100000	11530000000	300930000	4912800000	1252000000	9259000000	1198900000	10877000000	8672600000	2396800000
P02649;H0Y7L5;E9PEV4;E7ERP7	4	Apolipoprotein E	APOE	sp|P02649|APOE_HUMAN Apolipoprotein E OS=Homo sapiens OX=9606 GN=APOE PE=1 SV=1;tr|H0Y7L5|H0Y7L5_HUMAN Isoform of P02649, Apolipoprotein E (Fragment) OS=Homo sapiens OX=9606 GN=APOE PE=1 SV=2;tr|E9PEV4|E9PEV4_HUMAN Isoform of P02649, Apolipoprotein E (Frag	188030000	7097400000	5946600000	3431600000	980260000	727280000	4170900000	7360700000	4107900000	1058600000	1079700000	303980000	10485000000	300310000	1804900000	1513600000	4451200000	158020000	68037000	2200100000	175530000	414630000	407010000	615490000	315870000	7968200000	1994500000	22161000000	278780000	6379800000	29328000000	2452300000	1324900000	3732600000	44813000	409960000	9826400000	79739000	2155600000	3961900000	9346700000	1657400000	11901000000	6515400000	729510000
A6NGQ3;Q5VST9;Q5VST9-2;Q5VST9-6	7	Obscurin	OBSCN	tr|A6NGQ3|A6NGQ3_HUMAN Isoform of Q5VST9, Obscurin OS=Homo sapiens OX=9606 GN=OBSCN PE=1 SV=5;sp|Q5VST9|OBSCN_HUMAN Obscurin OS=Homo sapiens OX=9606 GN=OBSCN PE=1 SV=3;sp|Q5VST9-2|OBSCN-2_HUMAN Isoform of Q5VST9, Isoform 2 of Obscurin OS=Homo sapiens OX=96	134230000	106960000	54694000	97450000	10028000	118620000000	3664300	137280000	218030000	2565500000	119320000	16420000	164050000	16094000000	514670000	1483400000	1155700000	133710000	31635000	10335000000	94608000	3980800000	513380000	763540000	258900000	194560000	454080000	762030000	199750000	254790000	217210000	120790000	106630000	59839000	36392000	198250000	206820000	20713000	145050000	65645000	417280000	1005800000	645670000	99861000000	570770000
P08247;H7C4W3;P08247-2	5	Synaptophysin	SYP	sp|P08247|SYPH_HUMAN Synaptophysin OS=Homo sapiens OX=9606 GN=SYP PE=1 SV=3;tr|H7C4W3|H7C4W3_HUMAN Isoform of P08247, Synaptophysin (Fragment) OS=Homo sapiens OX=9606 GN=SYP PE=1 SV=1;sp|P08247-2|SYPH-2_HUMAN Isoform of P08247, Isoform 2 of Synaptophysin O	34588000	1687600000	1669400000	359050000	2058600000	2125300000	208450000	5082500000	1053000000	9673400000	4644200000	656080000	2927600000	97654000	10658000000	4871200000	3090600000	52650000	71383000	1816500000	270120000	4394900000	4321500000	21886000000	11265000000	380830000	8661800000	13133000000	9527900000	1316200000	5591300000	802040000	169500000	2105600000	352840000	63307000	10768000000	5114900	4323300000	1199100000	3322600000	3818900000	2479900000	2073800000	1330900000
O00154;O00154-6;O00154-7;O00154-5;K7EKP8	5	Cytosolic acyl coenzyme A thioester hydrolase	ACOT7	sp|O00154|BACH_HUMAN Cytosolic acyl coenzyme A thioester hydrolase OS=Homo sapiens OX=9606 GN=ACOT7 PE=1 SV=3;sp|O00154-6|BACH-6_HUMAN Isoform of O00154, Isoform 6 of Cytosolic acyl coenzyme A thioester hydrolase OS=Homo sapiens OX=9606 GN=ACOT7 PE=1 SV=3;	10062000000	3148000000	2103200000	2423800000	1905500000	14378000000	256420000	1122000000	1966600000	2895000000	510920000	130240000	7424000000	253900000	857920000	924280000	29502000000	3142000000	2442900000	5399200000	228270000	751610000	4235800000	2711600000	6547600000	76665000	11039000000	2053900000	296640000	2340100000	1888700000	541720000	3192800000	506980000	395120000	360620000	525630000	168920000	4790600000	2851700000	14548000000	1149000000	16612000000	17939000000	2389700000
Q9NU22	2	Midasin	MDN1	sp|Q9NU22|MDN1_HUMAN Midasin OS=Homo sapiens OX=9606 GN=MDN1 PE=1 SV=2	1438200000	2158100000	11825000000	72936000	68416000	1195500000	117020000	1163500000	121360000	2246100000	4209700000	67169000	206290000	146590000	19283000000	289340000	878760000	85984000	422390000	258780000	93364000	577650000	384050000	309150000	9961400000	31337000000	11215000000	1592300000	828690000	577850000	731910000	150210000	171560000	588860000	95470000	115350000	40682000	4805800	2389700000	481500000	3028400000	1285800000	1672400000	394770000	46363000
O94906-2;O94906	2	Pre-mRNA-processing factor 6	PRPF6	sp|O94906-2|PRP6-2_HUMAN Isoform of O94906, Isoform 2 of Pre-mRNA-processing factor 6 OS=Homo sapiens OX=9606 GN=PRPF6 PE=1 SV=1;sp|O94906|PRP6_HUMAN Pre-mRNA-processing factor 6 OS=Homo sapiens OX=9606 GN=PRPF6 PE=1 SV=1	7032300	29397000	743840	18918000	7825200	130620000	56978000	115230000	9801800	7340300	254660000	6862900	46579000	391450	86744000	264930000	3410200	12891000	14211000	10519000	36490000	139030000	15439000	254780000	138230000	7318500	16608000000	272330000000	350940000	200140000	15288000	38426000	35663000	2041500	58123000	5293500	13508000	28441000	1408000	4465800	305810000	72773000	82390000	146450000	119820000
Q09666	7	Neuroblast differentiation-associated protein AHNAK	AHNAK	sp|Q09666|AHNK_HUMAN Neuroblast differentiation-associated protein AHNAK OS=Homo sapiens OX=9606 GN=AHNAK PE=1 SV=2	11245000000	552260000	1064600000	977920000	1565900000	3042100000	89285000	1371700000	688790000	1265700000	984670000	260990000	4090100000	515900000	3700300000	2860200000	4476800000	828120000	746760000	1635400000	8193400000	1907700000	1303300000	128850000000	16583000000	561950000	2627400000	4312800000	539450000	1132100000	2075500000	202190000	1076700000	1061600000	882170000	383760000	2419800000	198900000	1776700000	1360100000	543580000	7259500000	10173000000	2732700000	1709300000
P50991	1	T-complex protein 1 subunit delta	CCT4	sp|P50991|TCPD_HUMAN T-complex protein 1 subunit delta OS=Homo sapiens OX=9606 GN=CCT4 PE=1 SV=4	4719400000	3794900000	3761700000	2123500000	1617400000	4631300000	846010000	5121500000	3047400000	7118900000	3268300000	998840000	6440800000	440650000	7932400000	8248500000	5037600000	1476800000	1470500000	6789800000	2057900000	7063700000	10379000000	9532000000	9383600000	1397300000	8782800000	13951000000	3891300000	2504100000	2853700000	653140000	6055400000	2722900000	1703400000	981030000	3198700000	497070000	4555600000	3268500000	3340900000	4043200000	9731700000	2903900000	5681600000
A0A0A0MT83;P26440;H7C4G6	6	Isovaleryl-CoA dehydrogenase, mitochondrial	IVD	tr|A0A0A0MT83|A0A0A0MT83_HUMAN Isoform of P26440, Isovaleryl-CoA dehydrogenase, mitochondrial OS=Homo sapiens OX=9606 GN=IVD PE=1 SV=1;sp|P26440|IVD_HUMAN Isovaleryl-CoA dehydrogenase, mitochondrial OS=Homo sapiens OX=9606 GN=IVD PE=1 SV=2;tr|H7C4G6|H7C4G6	1537500000	2330500000	1229200000	1330200000	1273900000	8931300000	1276300000	2494400000	1210300000	1541000000	2179200000	468380000	3660700000	758910000	3986000000	4391300000	7607900000	2291800000	2117700000	3564900000	1238300000	3157400000	3805100000	8942600000	3274500000	1185100000	4821000000	9234100000	3034000000	9102600000	16788000000	1776500000	3410500000	2431800000	1549600000	2539600000	5731000000	76269000	3282600000	1916300000	11515000000	2381200000	9754300000	7773400000	8563100000
D6RJB7;Q8N7Z5	2	Putative ankyrin repeat domain-containing protein 31	ANKRD31	tr|D6RJB7|D6RJB7_HUMAN Isoform of Q8N7Z5, Putative ankyrin repeat domain-containing protein 31 OS=Homo sapiens OX=9606 GN=ANKRD31 PE=4 SV=2;sp|Q8N7Z5|ANR31_HUMAN Putative ankyrin repeat domain-containing protein 31 OS=Homo sapiens OX=9606 GN=ANKRD31 PE=5 S	20588000	21612000	5465000	342510000	9371100	169560000	13327000	144740000	25066000000	25976000	0	0	1437500	0	508910000	6148200	0	3835000	10423000	483400000	19093000	479350000	131830000	105060000	20613000	0	0	24371000	11644000	164760000	34050000	25543000	471730000	65266000	19369000000	1088200	194110000	0	0	0	26832000000	382650000	58253000	99460000000	366640000
B1AN99;P35030-5;P35030-3;P35030-2;P35030-4;P35030	6	Trypsin-3	PRSS3	tr|B1AN99|B1AN99_HUMAN Isoform of P35030, Trypsin-3 (Fragment) OS=Homo sapiens OX=9606 GN=PRSS3 PE=1 SV=8;sp|P35030-5|TRY3-5_HUMAN Isoform of P35030, Isoform 5 of Trypsin-3 OS=Homo sapiens OX=9606 GN=PRSS3 PE=1 SV=2;sp|P35030-3|TRY3-3_HUMAN Isoform of P350	38637000	49168000	44647000	7211300	50455000	11613000000	1419100000	40902000	69639000	425970000	48170000	71200000	101470000	1589700000	6074700000	12756000000	5910500000	130550000	795870000	12072000000	9536900000	161180000	4825500000	40158000000	9177300000	115070000	147540000	1169900000	4239200000	23998000	226930000	648700000	300500000	1524800000	15060000	3310600	6967300	1986900	404360000	80116000	26833000	28674000000	9078700000	4457400000	213690000
Q8N461	2	F-box/LRR-repeat protein 16	FBXL16	sp|Q8N461|FXL16_HUMAN F-box/LRR-repeat protein 16 OS=Homo sapiens OX=9606 GN=FBXL16 PE=2 SV=2	338220000	1272800000	1556700000	385140000	714080000	2188200000	395620000	3057500000	1124700000	5401400000	2090100000	760160000	6928200000	253710000	3475500000	4077700000	948840000	238300000	425110000	2131500000	13765000000	1955100000	3863200000	5773500000	2138300000	127320000	17881000000	32996000000	1481100000	947010000	4363600000	487510000	77739000	1108400000	629010000	371760000	3006800000	37286000	3345500000	1488800000	3482000000	2685400000	4215600000	2037600000	2162600000
E9PEB5;Q96AE4;Q96AE4-2	4	Far upstream element-binding protein 1	FUBP1	tr|E9PEB5|E9PEB5_HUMAN Isoform of Q96AE4, Far upstream element-binding protein 1 OS=Homo sapiens OX=9606 GN=FUBP1 PE=1 SV=1;sp|Q96AE4|FUBP1_HUMAN Far upstream element-binding protein 1 OS=Homo sapiens OX=9606 GN=FUBP1 PE=1 SV=3;sp|Q96AE4-2|FUBP1-2_HUMAN Is	6010500000	1987500000	1165300000	3752200000	1352700000	3347900000	1863900000	2843600000	1381100000	2660000000	3431600000	1197900000	6993800000	674210000	1402800000	3328600000	15305000000	306990000	875410000	2293900000	947940000	1272500000	2223100000	5440800000	1907500000	709770000	3236100000	8863800000	602470000	4314700000	7043800000	1402100000	1342100000	2090800000	1444000000	1360400000	9212100000	3374500000	3980300000	1499500000	5172100000	4931300000	19344000000	4906000000	2450000000
O94985-2;A0A3B3ITY6	2	Calsyntenin-1;Soluble Alc-alpha;CTF1-alpha	CLSTN1	sp|O94985-2|CSTN1-2_HUMAN Isoform of O94985, Isoform 2 of Calsyntenin-1 OS=Homo sapiens OX=9606 GN=CLSTN1 PE=1 SV=1;tr|A0A3B3ITY6|A0A3B3ITY6_HUMAN Isoform of O94985, Calsyntenin-1 (Fragment) OS=Homo sapiens OX=9606 GN=CLSTN1 PE=1 SV=1	792640000	1783800000	2433800000	1872400000	673150000	1208800000	73514000	3031800000	2754100000	3072600000	1359000000	1600800000	11900000000	1714200000	1506200000	3673800000	1545300000	350490000	537150000	3121100000	653530000	2701000000	1981400000	10470000000	5455300000	167080000	2964000000	5537400000	2544100000	2492600000	17357000000	1202400000	890650000	3505100000	852670000	1241000000	3922400000	1742000000	2239800000	7973600000	10054000000	4636100000	14047000000	8578100000	3549100000
Q14457;K7ELY9;E7EV84	6	Beclin-1	BECN1	sp|Q14457|BECN1_HUMAN Beclin-1 OS=Homo sapiens OX=9606 GN=BECN1 PE=1 SV=2;tr|K7ELY9|K7ELY9_HUMAN Isoform of Q14457, Beclin-1 (Fragment) OS=Homo sapiens OX=9606 GN=BECN1 PE=1 SV=1;tr|E7EV84|E7EV84_HUMAN Isoform of Q14457, Beclin-1 OS=Homo sapiens OX=9606 GN	4585900	6327000	98307000	5440300	12532000	16336000	857290	14604000	25268000	65107000	27753000	0	35857000	6320700	108170000	90430000	228180000	107470000	4875000	1435900000	209290000	308490000	53987000	125450000	155590000	1181300000	175090000000	81618000	44288000	29019000	368020000	27839000	2668500	18305000	4685500	136650000	13061000	0	381150000	84874000	15452000	2550900000	1269200000	35664000	1810500000
P0DOY3	1	Immunoglobulin lambda constant 3	IGLC3	sp|P0DOY3|IGLC3_HUMAN Immunoglobulin lambda constant 3 OS=Homo sapiens OX=9606 GN=IGLC3 PE=1 SV=1	851170000	1233500000	1466500000	2868400000	779290000	5964000000	980340000	499450000	554780000	340880000	1417000000	698030000	1633500000	811940000	1503700000	2971300000	2453100000	7091300000	678130000	5311900000	478720000	2015300000	1223400000	6590600000	5394800000	1634600000	2804300000	3824600000	1552000000	2600800000	3716900000	1305200000	5979800000	3674800000	474540000	824040000	3832600000	239970000	7360600000	2800500000	7046100000	4244600000	10189000000	6358300000	4486300000
B7WPN9;Q4VNC1;Q4VNC1-2	7	Probable cation-transporting ATPase 13A4	ATP13A4	tr|B7WPN9|B7WPN9_HUMAN Isoform of Q4VNC1, Cation-transporting ATPase OS=Homo sapiens OX=9606 GN=ATP13A4 PE=1 SV=1;sp|Q4VNC1|AT134_HUMAN Probable cation-transporting ATPase 13A4 OS=Homo sapiens OX=9606 GN=ATP13A4 PE=2 SV=3;sp|Q4VNC1-2|AT134-2_HUMAN Isoform	41140000	136390	42550000	2371800	1236700	16590000	7317700	15826000	12543000	832560000	18948000	330410000	14439000	2085000000	44925000	35565000	3891600000	13130000	1559100	9901600	22826000	279030000	593490	66558000	40281000	244470000000	187330000	21758000	15268000	2255900000	245300000	6673400000	809640000	65568000	0	477160000	41511000	0	94743000	43519000	427940	25019000	73449000	128220000	153300000
A0A0A0MTN0;Q13617;Q13617-2;Q5T2B5	5	Cullin-2	CUL2	tr|A0A0A0MTN0|A0A0A0MTN0_HUMAN Isoform of Q13617, Cullin-2 OS=Homo sapiens OX=9606 GN=CUL2 PE=1 SV=1;sp|Q13617|CUL2_HUMAN Cullin-2 OS=Homo sapiens OX=9606 GN=CUL2 PE=1 SV=2;sp|Q13617-2|CUL2-2_HUMAN Isoform of Q13617, Isoform 2 of Cullin-2 OS=Homo sapiens O	3032600000	3062000000	3393700000	3574800000	2131500000	6121900000	10293000	6145300000	2671600000	5080100000	3446600000	1994000000	9110800000	1179800000	3800500000	8683000000	4919700000	668340000	1651300000	5191100000	1943100000	4974700000	6267400000	8365200000	4200100000	803820000	9066200000	9767000000	2022000000	839790000	3409000000	728870000	2270700000	2982000000	3076500000	1539500000	3184600000	4228000000	5517800000	3102700000	3892200000	12318000000	10680000000	4382400000	3668800000
G3V5R9;Q07866-6;G3V3H3;Q07866-4;Q07866-9	6	Kinesin light chain 1	KLC1	tr|G3V5R9|G3V5R9_HUMAN Isoform of Q07866, Kinesin light chain 1 OS=Homo sapiens OX=9606 GN=KLC1 PE=1 SV=1;sp|Q07866-6|KLC1-6_HUMAN Isoform of Q07866, Isoform N of Kinesin light chain 1 OS=Homo sapiens OX=9606 GN=KLC1 PE=1 SV=2;tr|G3V3H3|G3V3H3_HUMAN Isofor	2635400000	2730900000	3173700000	2218600000	2170300000	8091300000	127330000	6598100000	2306300000	6720100000	1888600000	1394700000	5072800000	1488100000	4748500000	5201000000	3808900000	3900800000	2741300000	5971100000	15301000000	3780400000	7697300000	8630400000	6123200000	838890000	5875900000	12918000000	4097300000	634080000	3222400000	395260000	4591000000	1786500000	3055600000	2313800000	2227500000	2886000000	3259700000	3209500000	2157300000	6205300000	8590600000	8226100000	6047500000
Q15048;E9PP40	4	Leucine-rich repeat-containing protein 14	LRRC14	sp|Q15048|LRC14_HUMAN Leucine-rich repeat-containing protein 14 OS=Homo sapiens OX=9606 GN=LRRC14 PE=1 SV=1;tr|E9PP40|E9PP40_HUMAN Isoform of Q15048, Leucine-rich repeat-containing protein 14 (Fragment) OS=Homo sapiens OX=9606 GN=LRRC14 PE=1 SV=1	156500000	5470400	167750000	4417000	6591600	13044000000	0	8289300	8895700	556060000	9015700	5109500	13327000	0	324100000	184340000	0	45600000	43193000	112770000	5068300	77047000	229260000	209380000	26317000	2017100	28859000	51353000	39369000	676340000	10905000	16152000	130940000	570000000	5436200	110630000	23222000	8380800	44694000	796650	20895000	77791000	34341000	20359000000	78721000
Q9Y5P6-2;Q9Y5P6	2	Mannose-1-phosphate guanyltransferase beta	GMPPB	sp|Q9Y5P6-2|GMPPB-2_HUMAN Isoform of Q9Y5P6, Isoform 2 of Mannose-1-phosphate guanyltransferase beta OS=Homo sapiens OX=9606 GN=GMPPB PE=1 SV=2;sp|Q9Y5P6|GMPPB_HUMAN Mannose-1-phosphate guanyltransferase beta OS=Homo sapiens OX=9606 GN=GMPPB PE=1 SV=2	1114600000	2052200000	1513600000	1607800000	717390000	4842800000	1347200000	2268200000	1921700000	1234400000	1512700000	304630000	6984900000	737050000	2559500000	2514200000	6377500000	1166200000	1019400000	4273800000	595050000	2740400000	2212800000	2959200000	2232600000	660610000	4061500000	9120800000	1204800000	2863300000	11859000000	2363100000	3563900000	2424400000	1480500000	1742600000	5423500000	169020000	5365000000	2087200000	13578000000	1816300000	14336000000	5321900000	4386800000
P10515;E9PEJ4	3	Dihydrolipoyllysine-residue acetyltransferase component of pyruvate dehydrogenase complex, mitochondrial;Acetyltransferase component of pyruvate dehydrogenase complex	DLAT	sp|P10515|ODP2_HUMAN Dihydrolipoyllysine-residue acetyltransferase component of pyruvate dehydrogenase complex, mitochondrial OS=Homo sapiens OX=9606 GN=DLAT PE=1 SV=3;tr|E9PEJ4|E9PEJ4_HUMAN Isoform of P10515, Acetyltransferase component of pyruvate dehydr	2846000000	2133100000	2151900000	2898700000	1620000000	11966000000	563460000	3246500000	1082200000	840350000	2523600000	215920000	5560500000	767460000	2947500000	8898600000	15886000000	1781200000	3003400000	6976400000	4623400000	3464700000	941800000	18521000000	3587200000	1137700000	8669500000	14427000000	1603000000	1383000000	2461100000	590120000	2088700000	1735100000	2620200000	1342100000	1974000000	2097500000	1303300000	2077200000	2813100000	7895000000	7817400000	4018800000	9247600000
A0A087WY71;Q96CW1-2;Q96CW1;E9PFW3;C9JJ47	10	AP-2 complex subunit mu	AP2M1	tr|A0A087WY71|A0A087WY71_HUMAN Isoform of Q96CW1, AP-2 complex subunit mu OS=Homo sapiens OX=9606 GN=AP2M1 PE=1 SV=1;sp|Q96CW1-2|AP2M1-2_HUMAN Isoform of Q96CW1, Isoform 2 of AP-2 complex subunit mu OS=Homo sapiens OX=9606 GN=AP2M1 PE=1 SV=2;sp|Q96CW1|AP2M	890060000	3998200000	3089000000	1700200000	1545600000	1759300000	540400000	5178400000	2235600000	5681500000	2493800000	632980000	6177700000	534250000	8869600000	7565100000	5295600000	693480000	1415700000	4831200000	842510000	6728600000	8537900000	10426000000	7161100000	522150000	4777300000	8492500000	4807200000	3702800000	6746800000	1033600000	1662000000	2004000000	1858000000	837330000	2467800000	192460000	7144200000	2951800000	7567800000	5123300000	6351300000	4804200000	6936400000
O00468-6;O00468-3;O00468-7;O00468-5;O00468-4;O00468;A0A494C0G5;A0A087X208;A0A494C1I6;O00468-2	10	Agrin;Agrin N-terminal 110 kDa subunit;Agrin C-terminal 110 kDa subunit;Agrin C-terminal 90 kDa fragment;Agrin C-terminal 22 kDa fragment	AGRN	sp|O00468-6|AGRIN-6_HUMAN Isoform of O00468, Isoform 6 of Agrin OS=Homo sapiens OX=9606 GN=AGRN PE=1 SV=6;sp|O00468-3|AGRIN-3_HUMAN Isoform of O00468, Isoform 3 of Agrin OS=Homo sapiens OX=9606 GN=AGRN PE=1 SV=6;sp|O00468-7|AGRIN-7_HUMAN Isoform of O00468,	1069100000	617150000	3854100000	712670000	963430000	8737800000	208270000	5298500000	2877700000	2574100000	1836400000	308290000	3373200000	95631000	4461200000	5250200000	2257400000	145860000	112040000	3099000000	12911000000	12065000000	351470000	11533000000	409510000	1218900000	2341200000	11409000000	167870000	5431800000	4864900000	1357700000	2661900000	514850000	1316800000	1029500000	1670000000	11994000000	3971500000	1383100000	3135000000	21581000000	9584000000	13730000000	3143100000
Q16537;Q16537-2;Q16537-3	3	Serine/threonine-protein phosphatase 2A 56 kDa regulatory subunit epsilon isoform	PPP2R5E	sp|Q16537|2A5E_HUMAN Serine/threonine-protein phosphatase 2A 56 kDa regulatory subunit epsilon isoform OS=Homo sapiens OX=9606 GN=PPP2R5E PE=1 SV=1;sp|Q16537-2|2A5E-2_HUMAN Isoform of Q16537, Isoform 2 of Serine/threonine-protein phosphatase 2A 56 kDa regu	1185300000	2048200000	2786200000	2425600000	1235500000	2977900000	772260000	4274900000	2781400000	4530600000	3827600000	952130000	9233400000	1273800000	6234900000	7303300000	6161300000	247100000	759010000	3727800000	1260100000	4208900000	4574900000	6945600000	11562000000	919800000	7139500000	6798500000	2717800000	1936700000	7959200000	835720000	2042400000	2068700000	1330400000	680530000	3579500000	830680000	5846100000	1638700000	4170200000	7575300000	13756000000	6812100000	6251200000
G8JLG2;Q2L6G8;Q15517	3	Corneodesmosin	CDSN	tr|G8JLG2|G8JLG2_HUMAN Isoform of Q15517, CDSN OS=Homo sapiens OX=9606 GN=CDSN PE=1 SV=1;tr|Q2L6G8|Q2L6G8_HUMAN Isoform of Q15517, CDSN OS=Homo sapiens OX=9606 GN=CDSN PE=1 SV=1;sp|Q15517|CDSN_HUMAN Corneodesmosin OS=Homo sapiens OX=9606 GN=CDSN PE=1 SV=3	22974000000	1319700000	2134000000	7696200000	649370000	3473400000	800290000	1798700000	702540000	1484400000	1969200000	452060000	7295700000	1734300000	2927600000	2816600000	1233900000	2276300000	2856400000	5118000000	13385000000	7115800000	3430900000	31103000000	8523700000	478190000	1018500000	6042300000	2105500000	1134300000	676510000	243010000	945280000	1209800000	2316900000	919490000	1070500000	504090000	1367600000	3745900000	535960000	8188800000	18153000000	3656000000	1662500000
P33176	1	Kinesin-1 heavy chain	KIF5B	sp|P33176|KINH_HUMAN Kinesin-1 heavy chain OS=Homo sapiens OX=9606 GN=KIF5B PE=1 SV=1	6597800000	2467800000	2994900000	2599300000	1273600000	6198200000	420180000	7073100000	2263400000	2852100000	2181300000	1619400000	4179000000	1564500000	4184800000	4333600000	5175500000	1588200000	1842900000	5759000000	1771800000	3784600000	2995300000	9595600000	4555100000	1670500000	5148200000	9583700000	2983000000	1753200000	3190200000	559940000	6016300000	1910700000	1664200000	2624300000	2635000000	2912800000	4073100000	2328000000	3031100000	12013000000	12431000000	7005200000	3168600000
E9PGT6;Q99627;Q99627-2	5	COP9 signalosome complex subunit 8	COPS8	tr|E9PGT6|E9PGT6_HUMAN Isoform of Q99627, COP9 signalosome complex subunit 8 OS=Homo sapiens OX=9606 GN=COPS8 PE=1 SV=1;sp|Q99627|CSN8_HUMAN COP9 signalosome complex subunit 8 OS=Homo sapiens OX=9606 GN=COPS8 PE=1 SV=1;sp|Q99627-2|CSN8-2_HUMAN Isoform of Q	846810000	1105000000	999290000	1214800000	483290000	7743700000	502670000	1976000000	1143900000	2082800000	5626100000	459060000	2369300000	346840000	1044100000	1964800000	2376500000	12926000000	273880000	3229300000	3746600000	1276000000	1867400000	3012100000	90559000000	194360000	3064500000	3629200000	958480000	2364200000	3257700000	709280000	1594300000	843630000	1791500000	1285800000	1630600000	3643200000	3803100000	1075300000	2778700000	5068900000	4377300000	3330800000	2040100000
Q86UP2;Q86UP2-4;Q86UP2-2	10	Kinectin	KTN1	sp|Q86UP2|KTN1_HUMAN Kinectin OS=Homo sapiens OX=9606 GN=KTN1 PE=1 SV=1;sp|Q86UP2-4|KTN1-4_HUMAN Isoform of Q86UP2, Isoform 4 of Kinectin OS=Homo sapiens OX=9606 GN=KTN1 PE=1 SV=1;sp|Q86UP2-2|KTN1-2_HUMAN Isoform of Q86UP2, Isoform 2 of Kinectin OS=Homo sa	3893700000	3445600000	2370500000	5276500000	1913700000	7966900000	167860000	3178200000	2469800000	3288000000	2596200000	1746200000	4994400000	1402100000	4594100000	6940100000	8336600000	750580000	1213100000	11006000000	3175200000	4692100000	3273900000	11573000000	5181400000	1174200000	5441900000	4330100000	3421400000	2092400000	838430000	129520000	2330200000	1489200000	1341100000	861390000	924250000	770790000	2049200000	1646800000	769790000	13647000000	12377000000	9725400000	3323500000
P49588;P49588-2	3	Alanine--tRNA ligase, cytoplasmic	AARS	sp|P49588|SYAC_HUMAN Alanine--tRNA ligase, cytoplasmic OS=Homo sapiens OX=9606 GN=AARS PE=1 SV=2;sp|P49588-2|SYAC-2_HUMAN Isoform of P49588, Isoform 2 of Alanine--tRNA ligase, cytoplasmic OS=Homo sapiens OX=9606 GN=AARS PE=1 SV=2	8830000000	2582900000	2290800000	4346200000	746670000	7486400000	751460000	4052200000	3731100000	6239800000	1794200000	1338400000	7059300000	1453500000	3670100000	11731000000	17518000000	1539800000	1103100000	2841300000	1492400000	5903600000	6121800000	22543000000	6095700000	4007200000	4049700000	8121600000	6079300000	2303300000	6311400000	512750000	3993100000	2486800000	734360000	468650000	1801500000	1697300000	2112300000	2613900000	2246400000	5929900000	2551900000	4107300000	5355600000
Q06203	3	Amidophosphoribosyltransferase	PPAT	sp|Q06203|PUR1_HUMAN Amidophosphoribosyltransferase OS=Homo sapiens OX=9606 GN=PPAT PE=1 SV=1	966460000	1766900000	1273200000	1447900000	593640000	7521400000	1960400000	2109000000	1409800000	1359100000	1390600000	701300000	6352200000	682000000	1940700000	2370700000	5212800000	802830000	1226000000	3092900000	1142900000	1537900000	1450700000	4106700000	3014200000	1148600000	4285000000	9312700000	1136200000	18511000000	13289000000	1195600000	1849700000	2278400000	1457700000	2411100000	2833100000	1754700000	3313400000	1775400000	7438400000	1523000000	14603000000	6872400000	3770500000
K4DI93;Q13620-1;Q13620;Q13620-3	5	Cullin-4B	CUL4B	tr|K4DI93|K4DI93_HUMAN Isoform of Q13620, Cullin 4B, isoform CRA_e OS=Homo sapiens OX=9606 GN=CUL4B PE=1 SV=1;sp|Q13620-1|CUL4B-1_HUMAN Isoform of Q13620, Isoform 2 of Cullin-4B OS=Homo sapiens OX=9606 GN=CUL4B PE=1 SV=4;sp|Q13620|CUL4B_HUMAN Cullin-4B OS=	11594000000	3046200000	2498600000	4594700000	879520000	5838200000	1525500000	4721900000	2883500000	1474200000	1817200000	850920000	12824000000	732850000	2395200000	2652100000	14451000000	1887000000	1089200000	3221700000	2476700000	2766700000	3277900000	7280100000	4745100000	386170000	5179600000	4979000000	1682200000	5534500000	4716400000	970280000	2493700000	3980600000	1119500000	1225700000	5422000000	3034300000	3438100000	3152300000	4393300000	12522000000	10089000000	5125100000	4415200000
P52701-3;P52701;A0A087WWJ1;A0A494C0M1;P52701-2	7	DNA mismatch repair protein Msh6	MSH6	sp|P52701-3|MSH6-3_HUMAN Isoform of P52701, Isoform 3 of DNA mismatch repair protein Msh6 OS=Homo sapiens OX=9606 GN=MSH6 PE=1 SV=2;sp|P52701|MSH6_HUMAN DNA mismatch repair protein Msh6 OS=Homo sapiens OX=9606 GN=MSH6 PE=1 SV=2;tr|A0A087WWJ1|A0A087WWJ1_HUM	622210000	161480000	26471000	13655000	2768100	1823400000	3736900	166440000	7814500	241480000	58699000	9373000	336870000	34415000	125320000000	161870000	1044300000	607920000	38086000	432380000	30945000	291400000	82795000	731960000	522080000	18350000	552860000	327400000	3978000000	165150000	33925000	592910000	220870000	10503000	41263000	69648000	684300000	40627000	19813000	153230000	84340000	201410000	1565500000	1900600000	296720000
Q13200;Q13200-3;Q13200-2	7	26S proteasome non-ATPase regulatory subunit 2	PSMD2	sp|Q13200|PSMD2_HUMAN 26S proteasome non-ATPase regulatory subunit 2 OS=Homo sapiens OX=9606 GN=PSMD2 PE=1 SV=3;sp|Q13200-3|PSMD2-3_HUMAN Isoform of Q13200, Isoform 3 of 26S proteasome non-ATPase regulatory subunit 2 OS=Homo sapiens OX=9606 GN=PSMD2 PE=1 S	2335800000	2545700000	3250500000	2199500000	1618000000	4172900000	193190000	3816500000	1951800000	9894400000	2637100000	1273600000	11945000000	1067200000	4661900000	10472000000	3211500000	2615600000	1967900000	4626900000	4620300000	3977200000	8054000000	12201000000	3272000000	1779500000	6057000000	15599000000	2710300000	2246700000	2821900000	212770000	3230600000	2712600000	1602400000	1301500000	3822100000	997520000	2368400000	2367400000	2057900000	6856000000	17416000000	5301800000	2495900000
Q02108;Q02108-2;J3KPQ8	5	Guanylate cyclase soluble subunit alpha-3	GUCY1A3	sp|Q02108|GCYA1_HUMAN Guanylate cyclase soluble subunit alpha-1 OS=Homo sapiens OX=9606 GN=GUCY1A1 PE=1 SV=2;sp|Q02108-2|GCYA1-2_HUMAN Isoform of Q02108, Isoform 2 of Guanylate cyclase soluble subunit alpha-1 OS=Homo sapiens OX=9606 GN=GUCY1A1 PE=1 SV=2;tr	459680000	796960000	1445800000	523790000	612190000	4312900000	14531000	2128400000	772130000	2569700000	1769100000	1095300000	1269500000	972470000	2857300000	1748100000	356420000	193660000	560960000	8553000000	440160000	1519300000	1659200000	2781700000	2879300000	1333400000	2559600000	7660900000	1529100000	1005300000	10976000000	969170000	766310000	2346200000	2551200000	2502200000	5608900000	1268500000	6150300000	1842500000	7899900000	3961600000	5559000000	4246000000	1939600000
Q9UNF0-2;Q9UNF0;A0A0U1RR22	6	Protein kinase C and casein kinase substrate in neurons protein 2	PACSIN2	sp|Q9UNF0-2|PACN2-2_HUMAN Isoform of Q9UNF0, Isoform 2 of Protein kinase C and casein kinase substrate in neurons protein 2 OS=Homo sapiens OX=9606 GN=PACSIN2 PE=1 SV=2;sp|Q9UNF0|PACN2_HUMAN Protein kinase C and casein kinase substrate in neurons protein 2	276250000	847570000	885840000	994550000	1390400000	6101000000	2356100000	1800200000	724660000	1864400000	2035500000	849830000	3763900000	575140000	7748400000	3067800000	9812300000	88822000	241920000	3595100000	460630000	1470600000	6172400000	4027000000	7980100000	713740000	7646000000	28119000000	1514400000	2089900000	5217400000	1561900000	1095700000	1409700000	1085600000	1350500000	5103500000	1062300000	6118400000	1300600000	5233300000	3465100000	11502000000	6342200000	5835800000
Q9Y4G6;A0A1B0GVU7	2	Talin-2	TLN2	sp|Q9Y4G6|TLN2_HUMAN Talin-2 OS=Homo sapiens OX=9606 GN=TLN2 PE=1 SV=4;tr|A0A1B0GVU7|A0A1B0GVU7_HUMAN Isoform of Q9Y4G6, Talin-2 OS=Homo sapiens OX=9606 GN=TLN2 PE=1 SV=1	2466000000	2242600000	1686400000	627600000	772950000	4587700000	42122000	1898200000	7832000000	9056000000	4102000000	815680000	2776100000	874030000	15425000000	12498000000	1866500000	1840700000	1562300000	11027000000	805550000	11310000000	8232100000	23405000000	6848400000	1128600000	2231800000	5440700000	8445400000	1135700000	1223500000	28564000	4069300000	1068100000	1491600000	191750000	696410000	387760000	1035200000	1247600000	1994200000	11615000000	3368400000	2477600000	5006300000
O00231;O00231-2	5	26S proteasome non-ATPase regulatory subunit 11	PSMD11	sp|O00231|PSD11_HUMAN 26S proteasome non-ATPase regulatory subunit 11 OS=Homo sapiens OX=9606 GN=PSMD11 PE=1 SV=3;sp|O00231-2|PSD11-2_HUMAN Isoform of O00231, Isoform 2 of 26S proteasome non-ATPase regulatory subunit 11 OS=Homo sapiens OX=9606 GN=PSMD11 PE	1719200000	3871900000	3139700000	1250200000	1855200000	3047500000	313430000	2736200000	1864000000	6990200000	1975500000	451230000	3985700000	1603100000	7551600000	4920600000	9137100000	949410000	1926300000	3071500000	4005800000	3103800000	5929900000	11896000000	3422900000	2153000000	3165600000	21347000000	13962000000	437190000	2155400000	174350000	3376900000	1507600000	1657700000	600850000	881560000	7937900	1008100000	1976700000	1284700000	2921600000	31067000000	1775600000	4794400000
P78371;F5GWF6;F8VQ14	3	T-complex protein 1 subunit beta	CCT2	sp|P78371|TCPB_HUMAN T-complex protein 1 subunit beta OS=Homo sapiens OX=9606 GN=CCT2 PE=1 SV=4;tr|F5GWF6|F5GWF6_HUMAN Isoform of P78371, T-complex protein 1 subunit beta OS=Homo sapiens OX=9606 GN=CCT2 PE=1 SV=2;tr|F8VQ14|F8VQ14_HUMAN Isoform of P78371, T	3259700000	4127600000	4089700000	1405600000	1532000000	1993200000	328530000	5685000000	2377400000	7791200000	3870300000	683300000	4025600000	291470000	8389800000	11158000000	5802600000	841200000	1445000000	5994200000	2887200000	6094500000	7647100000	10061000000	8272300000	1269500000	6726200000	10307000000	3568600000	362070000	1491800000	618090000	5636800000	1224100000	1996200000	696510000	1918700000	26293000	8299300000	3657300000	2291300000	4801400000	6958000000	2565900000	4523300000
P19174-2;P19174	7	1-phosphatidylinositol 4,5-bisphosphate phosphodiesterase gamma-1	PLCG1	sp|P19174-2|PLCG1-2_HUMAN Isoform of P19174, Isoform 2 of 1-phosphatidylinositol 4,5-bisphosphate phosphodiesterase gamma-1 OS=Homo sapiens OX=9606 GN=PLCG1 PE=1 SV=1;sp|P19174|PLCG1_HUMAN 1-phosphatidylinositol 4,5-bisphosphate phosphodiesterase gamma-1 O	2162600000	1673200000	1451000000	1923800000	865860000	4361800000	27676000	3839600000	2297300000	3153300000	2738500000	1363200000	7760700000	1249100000	4679800000	4592100000	10050000000	514640000	590120000	5897900000	941460000	4256600000	2876500000	9899600000	4267500000	712040000	4081200000	8054700000	1768800000	5569000000	4920600000	1688500000	1654900000	1785800000	1485500000	1712900000	5164300000	1976300000	10790000000	1250400000	7235500000	7380800000	11226000000	5432800000	4097100000
P25789;H0YN18;H0YMZ1;H0YL69;P25789-2;H0YMA1;H0YLC2	8	Proteasome subunit alpha type-4;Proteasome subunit alpha type	PSMA4	sp|P25789|PSA4_HUMAN Proteasome subunit alpha type-4 OS=Homo sapiens OX=9606 GN=PSMA4 PE=1 SV=1;tr|H0YN18|H0YN18_HUMAN Isoform of P25789, Proteasome endopeptidase complex OS=Homo sapiens OX=9606 GN=PSMA4 PE=1 SV=1;tr|H0YMZ1|H0YMZ1_HUMAN Isoform of P25789,	1666800000	2810300000	1921500000	2948600000	874520000	5334500000	1374100000	4297500000	2058900000	1212100000	1753700000	431390000	7490200000	807830000	2184300000	4792200000	6136200000	4413600000	1477400000	3031800000	2573100000	3983500000	3569300000	6985200000	7223300000	438970000	4189000000	9510400000	3975700000	3559400000	5224000000	278230000	2729500000	2447200000	1337100000	1615500000	1155000000	82563000	2599000000	2972600000	3289600000	3915100000	12748000000	4118800000	10451000000
Q8IZP0-4;Q8IZP0-3;Q8IZP0-6;Q8IZP0-9;Q8IZP0;B6VEX4;A0A0A0MRT6;Q8IZP0-8;Q8IZP0-7;Q8IZP0-2;Q8IZP0-5;Q8IZP0-10;Q8IZP0-12;Q8IZP0-11	14	Abl interactor 1	ABI1	sp|Q8IZP0-4|ABI1-4_HUMAN Isoform of Q8IZP0, Isoform 4 of Abl interactor 1 OS=Homo sapiens OX=9606 GN=ABI1 PE=1 SV=4;sp|Q8IZP0-3|ABI1-3_HUMAN Isoform of Q8IZP0, Isoform 3 of Abl interactor 1 OS=Homo sapiens OX=9606 GN=ABI1 PE=1 SV=4;sp|Q8IZP0-6|ABI1-6_HUMAN	2575400000	872160000	1236500000	7010700000	1449700000	499030000	117640000	3936600000	1379800000	2836300000	1537300000	963620000	3355000000	2812600000	1847400000	4202000000	943360000	165630000	4146000000	2637700000	2197800000	1464100000	7675900000	43357000000	4688800000	970110000	6909800000	18541000000	1879400000	1632400000	2178500000	543940000	748330000	1483000000	3796600000	1628100000	5123800000	789600000	5832100000	1497700000	2850900000	4500300000	15366000000	2190700000	1546600000
P24821;P24821-3	2	Tenascin	TNC	sp|P24821|TENA_HUMAN Tenascin OS=Homo sapiens OX=9606 GN=TNC PE=1 SV=3;sp|P24821-3|TENA-3_HUMAN Isoform of P24821, Isoform 3 of Tenascin OS=Homo sapiens OX=9606 GN=TNC PE=1 SV=3	7769300000	227540000	479230000	465460000	307580000	31540000000	146180000	481970000	465210000	568620000	214500000	190460000	651150000	654300000	1429800000	419360000	275810000	449930000	555950000	8538100000	1017500000	402320000	578070000	537860000	1402100000	1530400000	6111900000	5665000000	589470000	13647000000	2509600000	579040000	2420500000	593050000	1002600000	8721000000	253270000	4469300000	412650000	479480000	2434200000	2052100000	8941200000	40045000000	3762600000
P28074;P28074-3	5	Proteasome subunit beta type-5	PSMB5	sp|P28074|PSB5_HUMAN Proteasome subunit beta type-5 OS=Homo sapiens OX=9606 GN=PSMB5 PE=1 SV=3;sp|P28074-3|PSB5-3_HUMAN Isoform of P28074, Isoform 3 of Proteasome subunit beta type-5 OS=Homo sapiens OX=9606 GN=PSMB5 PE=1 SV=3	1570100000	2374400000	1579400000	3004200000	912980000	5656200000	1798200000	3857100000	1708800000	1194000000	1638900000	351630000	7552700000	633250000	2245800000	4457700000	6286700000	3928900000	1873000000	3749700000	2942700000	4209100000	4174800000	11512000000	6150000000	291400000	2910900000	6192600000	3887800000	3988300000	4830000000	326800000	2158100000	2800000000	1554300000	1442700000	1296900000	54527000	1984900000	2589700000	3667700000	4339400000	10040000000	4152300000	13603000000
P18206-2;P18206	4	Vinculin	VCL	sp|P18206-2|VINC-2_HUMAN Isoform of P18206, Isoform 1 of Vinculin OS=Homo sapiens OX=9606 GN=VCL PE=1 SV=4;sp|P18206|VINC_HUMAN Vinculin OS=Homo sapiens OX=9606 GN=VCL PE=1 SV=4	7083000000	1758400000	1000900000	1601300000	513250000	4650900000	256570000	2504100000	972880000	2695000000	1663900000	373330000	2823900000	372780000	4911900000	5085000000	4147200000	945800000	410770000	6713300000	6037000000	3330300000	2831700000	10241000000	3525000000	2427800000	2731500000	5838400000	940920000	9439000000	7220100000	685360000	8976800000	3022800000	855420000	942160000	4332300000	1323500000	1685700000	1027700000	2835100000	8075500000	6974900000	7003000000	2696100000
P62807;P57053;O60814;U3KQK0;Q99880;Q99879;Q99877;Q93079;Q5QNW6;Q5QNW6-2	10	Histone H2B type 1-C/E/F/G/I;Histone H2B type F-S;Histone H2B type 1-K;Histone H2B;Histone H2B type 1-L;Histone H2B type 1-M;Histone H2B type 1-N;Histone H2B type 1-H;Histone H2B type 2-F	HIST1H2BC	sp|P62807|H2B1C_HUMAN Histone H2B type 1-C/E/F/G/I OS=Homo sapiens OX=9606 GN=HIST1H2BI PE=1 SV=4;sp|P57053|H2BFS_HUMAN Histone H2B type F-S OS=Homo sapiens OX=9606 GN=H2BFS PE=1 SV=2;sp|O60814|H2B1K_HUMAN Histone H2B type 1-K OS=Homo sapiens OX=9606 GN=HI	683170000	2118700000	564170000	296460000	662010000	57448000000	186720000	1150200000	549310000	766130000	1647400000	548170000	1713400000	210890000	415640000	9452800000	2447500000	831160000	2386100000	454690000	3614100000	1190900000	1414300000	14785000000	1233700000	176260000	1664900000	1128900000	2802700000	820890000	1116000000	594920000	997310000	302660000	1256100000	54113000	554830000	499950	13054000000	1877400000	597240000	6291800000	8085800000	3410400000	535070000
Q9HCR9;Q9HCR9-3	4	Dual 3,5-cyclic-AMP and -GMP phosphodiesterase 11A	PDE11A	sp|Q9HCR9|PDE11_HUMAN Dual 3,5-cyclic-AMP and -GMP phosphodiesterase 11A OS=Homo sapiens OX=9606 GN=PDE11A PE=1 SV=2;sp|Q9HCR9-3|PDE11-3_HUMAN Isoform of Q9HCR9, Isoform 3 of Dual 3,5-cyclic-AMP and -GMP phosphodiesterase 11A OS=Homo sapiens OX=9606 GN	720750000	41859000	118590000	20431000	0	536290000	45294000	137120000	11746000	26470000	39094000	8536500	36210000	10593000	113080000	153930000	1785400000	41718000	22418000	19838000	65470000	79625000	48503000	133130000	149040000	7037300	208520000	185290000	47690000	127640000	210780000	126790000	21471000	5067100	7808300	855710	25255000	3593600	74967000	5428400	25160000	731530000	195190000	380630000	24014000
F5GYQ1;P61421;R4GN72;J3QL14	7	V-type proton ATPase subunit d 1	ATP6V0D1	tr|F5GYQ1|F5GYQ1_HUMAN Isoform of P61421, V-type proton ATPase subunit OS=Homo sapiens OX=9606 GN=ATP6V0D1 PE=1 SV=1;sp|P61421|VA0D1_HUMAN V-type proton ATPase subunit d 1 OS=Homo sapiens OX=9606 GN=ATP6V0D1 PE=1 SV=1;tr|R4GN72|R4GN72_HUMAN Isoform of P614	473410000	764640000	736090000	355960000	1425200000	893670000	8304400000	2009200000	1052700000	2518900000	1906000000	501760000	4999700000	229120000	4090200000	13698000000	19389000000	529090000	706210000	3212800000	2144300000	4260100000	2308400000	10209000000	6375500000	1055900000	4422400000	18021000000	3632800000	7447800000	11192000000	2011700000	580890000	1247700000	520760000	394450000	6939200000	43727000	3075400000	733590000	7264400000	1819200000	5776000000	6746100000	1474100000
P51888	1	Prolargin	PRELP	sp|P51888|PRELP_HUMAN Prolargin OS=Homo sapiens OX=9606 GN=PRELP PE=1 SV=1	77744000	1214500000	1441400000	199230000	58991000	166040000	26955000	839840000	163060000	107130000	1952800000	37491000	1590800000	50203000	6851900000	4317100000	175400000	727080000	53912000	2688500000	156690000	3189200000	261960000	4870400000	287290000	8228200000	138310000	6608800000	417840	2472800000	6993500000	53350000	7927800000	5199900000	23038000	50506000	10985000000	60353000	1247700000	234550000	1547700000	22411000	4787000000	484920000	1005500000
P35580-4;P35580-2	2	Myosin-10	MYH10	sp|P35580-4|MYH10-4_HUMAN Isoform of P35580, Isoform 4 of Myosin-10 OS=Homo sapiens OX=9606 GN=MYH10 PE=1 SV=3;sp|P35580-2|MYH10-2_HUMAN Isoform of P35580, Isoform 2 of Myosin-10 OS=Homo sapiens OX=9606 GN=MYH10 PE=1 SV=3	623520000	80323000	201150000	2332900000	91311000	347020000	26130000	876570000	192740000	1058400000	231230000	26450000	592970000	36015000	3937900000	1760400000	701910000	108850000	513470000	1134000000	85154000	713760000	1830100000	5883500000	12098000000	189560000	770390000	2567300000	742860000	431310000	557850000	82623000	462350000	74425000	44457000	64294000	295290000	108870000	1142500000	76401000	354800000	4269300000	204030000000	660760000	787120000
Q8NFF5;Q8NFF5-2;Q8NFF5-3;Q5T196	8	FAD synthase;Molybdenum cofactor biosynthesis protein-like region;FAD synthase region	FLAD1	sp|Q8NFF5|FAD1_HUMAN FAD synthase OS=Homo sapiens OX=9606 GN=FLAD1 PE=1 SV=1;sp|Q8NFF5-2|FAD1-2_HUMAN Isoform of Q8NFF5, Isoform 2 of FAD synthase OS=Homo sapiens OX=9606 GN=FLAD1 PE=1 SV=1;sp|Q8NFF5-3|FAD1-3_HUMAN Isoform of Q8NFF5, Isoform 3 of FAD synth	343770000	587990000	623970000	451770000	1392300000	4212400000	7659900000	596980000	436400000	691940000	682130000	98876000	2547500000	238010000	613630000	987120000	41797000000	305630000	3406200000	2530600000	445470000	553370000	1312800000	2328600000	1205300000	2013100000	6162700000	4791900000	383250000	3281200000	2949100000	478140000	28065000000	610730000	455880000	578570000	1491200000	501420000	2168300000	627140000	2512500000	4066100000	8631700000	6324800000	2635400000
Q99963-4;Q99963;Q99963-2	4	Endophilin-A3	SH3GL3	sp|Q99963-4|SH3G3-4_HUMAN Isoform of Q99963, Isoform 4 of Endophilin-A3 OS=Homo sapiens OX=9606 GN=SH3GL3 PE=1 SV=1;sp|Q99963|SH3G3_HUMAN Endophilin-A3 OS=Homo sapiens OX=9606 GN=SH3GL3 PE=1 SV=1;sp|Q99963-2|SH3G3-2_HUMAN Isoform of Q99963, Isoform 2 of En	1146100000	2602700000	2820300000	1178300000	2312800000	1324400000	1251000000	3115300000	2367100000	6265000000	3851500000	1646300000	11308000000	748780000	4487600000	8060500000	3984500000	515040000	933690000	4814200000	377960000	3710300000	4486300000	7578900000	8977000000	432120000	5200600000	3497400000	5525000000	850450000	4648100000	768290000	628750000	2859600000	2068700000	1092100000	3281600000	44718000	6502600000	2391800000	8063300000	2459600000	3991600000	5788500000	3577100000
A0A1B0GUU9;P01871;P01871-2	3	Ig mu chain C region	IGHM	tr|A0A1B0GUU9|A0A1B0GUU9_HUMAN Isoform of P01871, Immunoglobulin heavy constant mu (Fragment) OS=Homo sapiens OX=9606 GN=IGHM PE=1 SV=1;sp|P01871|IGHM_HUMAN Immunoglobulin heavy constant mu OS=Homo sapiens OX=9606 GN=IGHM PE=1 SV=4;sp|P01871-2|IGHM-2_HUMAN	8441700000	591560000	1457000000	1114500000	334040000	1000200000	146000000	612010000	406300000	193620000	1816800000	1277600000	3515800000	523330000	1709800000	6944800000	482140000	1484400000	373410000	2682000000	280340000	1149500000	798700000	4331400000	4467000000	814050000	1225200000	2326400000	1322800000	2446300000	6130900000	1709900000	11662000000	1284200000	7086300000	1607400000	10945000000	2384200000	4640100000	539970000	4631100000	7162600000	8470400000	5183400000	2593600000
P22694-5;P22694-7;P22694-10;B1APG0;B1APF7	5	cAMP-dependent protein kinase catalytic subunit beta	PRKACB	sp|P22694-5|KAPCB-5_HUMAN Isoform of P22694, Isoform 5 of cAMP-dependent protein kinase catalytic subunit beta OS=Homo sapiens OX=9606 GN=PRKACB PE=1 SV=2;sp|P22694-7|KAPCB-7_HUMAN Isoform of P22694, Isoform 7 of cAMP-dependent protein kinase catalytic sub	885700000	4766000000	3864100000	3066300000	1990800000	2882500000	51908000	3857300000	4309200000	4891200000	3684900000	842210000	9868200000	1075100000	6655200000	5643600000	2733500000	829400000	2538500000	3693100000	1211200000	5704100000	7023600000	18349000000	8110600000	260800000	5945400000	4322300000	3606600000	37550000	461720000	74531000	2019600000	2899000000	1903700000	263030000	118420000	1833300	860810000	4073300000	509310000	4881300000	7358500000	1248600000	9253100000
O75976;O75976-2	4	Carboxypeptidase D	CPD	sp|O75976|CBPD_HUMAN Carboxypeptidase D OS=Homo sapiens OX=9606 GN=CPD PE=1 SV=2;sp|O75976-2|CBPD-2_HUMAN Isoform of O75976, Isoform 2 of Carboxypeptidase D OS=Homo sapiens OX=9606 GN=CPD PE=1 SV=2	4991600000	13444000	1780400	2544600	6270900	138360000	437650	48753000	10282000	192590000	147600000	103270000	38323000	611240	539890000	2715500000	66144000	2642500000	6322500	10490000	35552000	18946000	109290000	474350000	127100000	224330000	28888000	151180000	25420000	270800000	1278000000	4599500	214720000	18327000	69742000	4178200	100870000	16144000	7325500	23306000	50816000	104940000	1266100000	301610000	211890000
P20930	1	Filaggrin	FLG	sp|P20930|FILA_HUMAN Filaggrin OS=Homo sapiens OX=9606 GN=FLG PE=1 SV=3	25629000000	912110000	1355300000	6469700000	1304300000	3966200000	3665900000	2380300000	481670000	1159400000	1772900000	44344000	4344700000	759760000	7777200000	1751300000	2106200000	209770000	2876600000	4138100000	7775300000	5266400000	1558000000	30660000000	11602000000	90644000	494880000	2253000000	988130000	7701400000	5522500000	534640000	462700000	397140000	698530000	1202900000	673550000	208200000	780290000	2277000000	718550000	11327000000	22202000000	3396900000	2450000000
P33402;P33402-3;P33402-2	3	Guanylate cyclase soluble subunit alpha-2	GUCY1A2	sp|P33402|GCYA2_HUMAN Guanylate cyclase soluble subunit alpha-2 OS=Homo sapiens OX=9606 GN=GUCY1A2 PE=1 SV=1;sp|P33402-3|GCYA2-3_HUMAN Isoform of P33402, Isoform 3 of Guanylate cyclase soluble subunit alpha-2 OS=Homo sapiens OX=9606 GN=GUCY1A2 PE=2 SV=1;sp	468140000	2447300000	1920300000	2708900000	1850900000	2065200000	270930000	4198500000	1860500000	3761600000	2171100000	1042500000	10356000000	673670000	4721200000	2956300000	2722500000	216480000	736840000	2364300000	2135600000	2583400000	4259100000	5544400000	3377100000	86554000	3927800000	7503800000	1213900000	3613100000	8443900000	2299800000	133340000	3508600000	1695700000	1288600000	9241800000	3707100000	9356400000	2014800000	7283500000	8105500000	12754000000	3806600000	4231600000
O14807;C9J8Q6;O14807-2	4	Ras-related protein M-Ras	MRAS	sp|O14807|RASM_HUMAN Ras-related protein M-Ras OS=Homo sapiens OX=9606 GN=MRAS PE=1 SV=2;tr|C9J8Q6|C9J8Q6_HUMAN Isoform of O14807, Ras-related protein M-Ras (Fragment) OS=Homo sapiens OX=9606 GN=MRAS PE=1 SV=1;sp|O14807-2|RASM-2_HUMAN Isoform of O14807, Is	18716000	681520000	156960000	36552000	41154000	167880000000	122480000	533680000	96062000	182460000	146960000	31034000	492750000	1695100	454950000	617330000	206800000	35819000	5276600	85040000	5580400	121330000	7989400000	12380000000	333040000	54998000	322400000	1070600000	132170000	5007100000	2449800000	41793000	68336000	78166000	12085000	21977000	665200000	0	824310000	48498000	203370000	1776300000	839200000	518380000	179680000
Q9H479	1	Fructosamine-3-kinase	FN3K	sp|Q9H479|FN3K_HUMAN Fructosamine-3-kinase OS=Homo sapiens OX=9606 GN=FN3K PE=1 SV=1	2579200000	2378500000	3187800000	1667700000	897170000	5280100000	980860000	3578300000	2407400000	2605400000	2425200000	512200000	7354100000	656220000	5374100000	2089500000	8931400000	844520000	1371200000	3299000000	1472300000	2839700000	2022900000	3539800000	2546800000	1724300000	2064300000	12082000000	1227600000	5559800000	17435000000	1572800000	3485700000	2341300000	1501700000	1903000000	5664400000	68838000	5277800000	1797000000	7499300000	1216000000	9645600000	4944300000	4584600000
D6RFW1;Q96EQ0	2	Small glutamine-rich tetratricopeptide repeat-containing protein beta	SGTB	tr|D6RFW1|D6RFW1_HUMAN Isoform of Q96EQ0, Small glutamine-rich tetratricopeptide repeat-containing protein beta (Fragment) OS=Homo sapiens OX=9606 GN=SGTB PE=1 SV=1;sp|Q96EQ0|SGTB_HUMAN Small glutamine-rich tetratricopeptide repeat-containing protein beta	312800000	7089500000	501280000	1556900000	348040000	5784600000	536240	609240000	205850000	1517400000	225250000	43550000	440260000	1611200000	6506500000	1192800000	121330000	12553000000	2351000000	21921000000	57487000	263040000	1319100000	79576000000	8012800000	24798000	5715700000	128310000	521770000	5488300	85945000	5106500	1335200000	94792000	135510000	15078000	10160000	0	36464000	251690000	48566000	542340000	47772000000	86669000	3520900000
O75390;B4DJV2;A0A0C4DGI3	20	Citrate synthase, mitochondrial;Citrate synthase	CS	sp|O75390|CISY_HUMAN Citrate synthase, mitochondrial OS=Homo sapiens OX=9606 GN=CS PE=1 SV=2;tr|B4DJV2|B4DJV2_HUMAN Isoform of O75390, Citrate synthase OS=Homo sapiens OX=9606 GN=CS PE=1 SV=1;tr|A0A0C4DGI3|A0A0C4DGI3_HUMAN Isoform of O75390, Citrate syntha	440760000	715100000	406890000	1155100000	480980000	5295900000	5745000000	2077000000	502890000	1388900000	1859100000	187270000	4682900000	126230000	2556700000	3727400000	16622000000	630000000	669580000	1332700000	1025600000	1106300000	981670000	3490700000	1474600000	932000000	2317400000	10361000000	643080000	7272400000	14773000000	3172100000	1068500000	1241100000	1236700000	1100800000	10651000000	163820000	6697800000	723670000	10457000000	1359700000	10686000000	5425000000	2053300000
P36952	3	Serpin B5	SERPINB5	sp|P36952|SPB5_HUMAN Serpin B5 OS=Homo sapiens OX=9606 GN=SERPINB5 PE=1 SV=2	17649000000	402740000	171070000	514830000	52595000	5328000000	51236000	156900000	177370000	89066000	41668000	31193000	136050000	409670000	37055000	698190000	1115200000	44722000	153060000	163930000	5011600000	129650000	96113000	65172000000	12117000000	12624000	150830000	370040000	141480000	22696000	103480000	129370000	90199000	72499000	21682000	1740500	220610000	0	295700000	258520000	111920000000	1839600000	9707600000	434940000	68257000
Q02218;E9PCR7;E9PDF2;Q02218-2;A0A0D9SFS3;E9PFG7	8	2-oxoglutarate dehydrogenase, mitochondrial	OGDH	sp|Q02218|ODO1_HUMAN 2-oxoglutarate dehydrogenase, mitochondrial OS=Homo sapiens OX=9606 GN=OGDH PE=1 SV=3;tr|E9PCR7|E9PCR7_HUMAN Isoform of Q02218, 2-oxoglutarate dehydrogenase, mitochondrial OS=Homo sapiens OX=9606 GN=OGDH PE=1 SV=1;tr|E9PDF2|E9PDF2_HUMA	4381000000	1407300000	1850800000	1133000000	623810000	6722400000	46433000	4629400000	865780000	1744500000	1911500000	331020000	3388500000	890620000	4220100000	13869000000	6192800000	1242200000	1394200000	5365000000	1370300000	3251000000	3525800000	5853900000	1550500000	1631100000	3215100000	10602000000	1962300000	1740900000	3264700000	726240000	2401400000	1434800000	1241900000	915650000	3983500000	2001600000	8229200000	1017300000	5731700000	4883000000	8638100000	6370500000	3310700000
P56545-2;Q5SQP8;P56545;P56545-3	4	C-terminal-binding protein 2	CTBP2	sp|P56545-2|CTBP2-2_HUMAN Isoform of P56545, Isoform 2 of C-terminal-binding protein 2 OS=Homo sapiens OX=9606 GN=CTBP2 PE=1 SV=1;tr|Q5SQP8|Q5SQP8_HUMAN Isoform of P56545, C-terminal-binding protein 2 OS=Homo sapiens OX=9606 GN=CTBP2 PE=1 SV=1;sp|P56545|CT	513760000	2507200000	1341700000	1720000000	785410000	2263500000	6049700000	1564200000	1979300000	1144700000	2206500000	580720000	5290000000	603510000	3000600000	4694600000	21645000000	951270000	976250000	4103500000	839240000	2378600000	2584300000	4144900000	4798300000	353610000	4617100000	9467800000	2025800000	3734800000	7679100000	1270600000	3137700000	1833800000	1125100000	1005300000	3702400000	128370000	2815500000	1708600000	6628200000	1860600000	10590000000	6325000000	4566200000
P40227;P40227-2	2	T-complex protein 1 subunit zeta	CCT6A	sp|P40227|TCPZ_HUMAN T-complex protein 1 subunit zeta OS=Homo sapiens OX=9606 GN=CCT6A PE=1 SV=3;sp|P40227-2|TCPZ-2_HUMAN Isoform of P40227, Isoform 2 of T-complex protein 1 subunit zeta OS=Homo sapiens OX=9606 GN=CCT6A PE=1 SV=3	1233700000	2564500000	3291100000	1356600000	1405000000	8204600000	442940000	3904700000	1925100000	5776100000	2684700000	809730000	4184800000	454320000	6944400000	7072600000	7047600000	1750600000	1402500000	5227600000	1620700000	6998500000	10522000000	8739900000	7906100000	1254600000	7489200000	12233000000	3379500000	923950000	1870600000	684540000	4597400000	1739700000	1462300000	738530000	1709800000	345460000	4152600000	2694700000	2547100000	3910300000	7701400000	3019400000	5942000000
P09543-2	4	2,3-cyclic-nucleotide 3-phosphodiesterase	CNP	sp|P09543-2|CN37-2_HUMAN Isoform of P09543, Isoform CNPI of 2,3-cyclic-nucleotide 3-phosphodiesterase OS=Homo sapiens OX=9606 GN=CNP PE=1 SV=2	1706500000	699470000	3939400000	609530000	1707800000	1450900000	89857000	4429900000	737130000	12853000000	1131200000	192730000	1562200000	568330000	9435300000	16548000000	3081900000	1846100000	2091100000	19543000000	725860000	2841500000	9226700000	3516600000	2954100000	451370000	6096800000	21071000000	1294500000	1207200000	4469200000	517710000	4166900000	705990000	1900500000	301450000	770450000	31394000	2148300000	1803200000	2755600000	3328300000	16617000000	2433400000	5444300000
P19623	5	Spermidine synthase	SRM	sp|P19623|SPEE_HUMAN Spermidine synthase OS=Homo sapiens OX=9606 GN=SRM PE=1 SV=1	1145700000	2501500000	1906900000	1587600000	916020000	8216200000	2068800000	1740100000	1902900000	2042700000	1316600000	886470000	5683300000	773780000	2760000000	2842900000	4099100000	2107400000	911370000	3816100000	1234600000	1088500000	1530100000	3955400000	2695100000	1046800000	4730000000	12205000000	1648100000	6067700000	7631500000	644050000	2272000000	2050200000	1152900000	1653400000	1346400000	42487000	2114600000	1322000000	3142000000	2294400000	9785400000	6927000000	5191500000
P12956;B1AHC9;P12956-2	3	X-ray repair cross-complementing protein 6	XRCC6	sp|P12956|XRCC6_HUMAN X-ray repair cross-complementing protein 6 OS=Homo sapiens OX=9606 GN=XRCC6 PE=1 SV=2;tr|B1AHC9|B1AHC9_HUMAN Isoform of P12956, X-ray repair cross-complementing protein 6 OS=Homo sapiens OX=9606 GN=XRCC6 PE=1 SV=1;sp|P12956-2|XRCC6-2_	924770000	2928000000	3123200000	926040000	887990000	5279300000	7936900	2959200000	3424400000	3486800000	3946800000	526760000	2993700000	580250000	3393900000	4331800000	1524400000	237670000	618690000	1183100000	1837300000	6854800000	2257500000	114080000000	3560300000	2260100000	1756600000	3952600000	1324200000	381160000	1363600000	26145000	2855900000	2740000000	885920000	38674000	937310000	123530000	2322300000	2026200000	364100000	4791800000	2880300000	585720000	2613600000
P51884	1	Lumican	LUM	sp|P51884|LUM_HUMAN Lumican OS=Homo sapiens OX=9606 GN=LUM PE=1 SV=2	181190000	1256000000	1947800000	871090000	205890000	1389200000	688490000	848390000	735560000	127280000	2835100000	131340000	3471300000	173400000	3443800000	6858800000	1223200000	1597000000	194020000	5713800000	2100000000	5609500000	438140000	8974600000	652620000	9148700000	548340000	10596000000	69469000	1906000000	7268300000	364220000	11307000000	3368700000	153240000	328060000	7220200000	142230000	1864000000	807040000	2299100000	2278000000	14834000000	1527500000	964440000
Q15008;Q15008-4;Q15008-3	4	26S proteasome non-ATPase regulatory subunit 6	PSMD6	sp|Q15008|PSMD6_HUMAN 26S proteasome non-ATPase regulatory subunit 6 OS=Homo sapiens OX=9606 GN=PSMD6 PE=1 SV=1;sp|Q15008-4|PSMD6-4_HUMAN Isoform of Q15008, Isoform 4 of 26S proteasome non-ATPase regulatory subunit 6 OS=Homo sapiens OX=9606 GN=PSMD6 PE=1 S	10089000000	2880200000	3112900000	1648600000	1293200000	2136500000	198150000	3036600000	2080600000	6846800000	2714100000	506680000	4397100000	662670000	8311100000	5719800000	2367400000	730780000	2009400000	3096100000	2882400000	3854700000	7500900000	7688500000	4042300000	941780000	4743600000	9964900000	2539300000	1194000000	3792500000	308940000	4623300000	1901800000	2152000000	601960000	1252100000	11952000	1064900000	2641800000	1921000000	3328800000	9904500000	2516500000	6134500000
Q07954	5	Prolow-density lipoprotein receptor-related protein 1;Low-density lipoprotein receptor-related protein 1 85 kDa subunit;Low-density lipoprotein receptor-related protein 1 515 kDa subunit;Low-density lipoprotein receptor-related protein 1 intracellular domain	LRP1	sp|Q07954|LRP1_HUMAN Prolow-density lipoprotein receptor-related protein 1 OS=Homo sapiens OX=9606 GN=LRP1 PE=1 SV=2	2339400000	825000000	820180000	908100000	214910000	2631700000	172090000	1618200000	696330000	1186500000	1843500000	235720000	2480200000	317740000	4273700000	2697600000	4046100000	506830000	232830000	4578400000	944480000	2907200000	3009400000	7628700000	1366000000	2401800000	1988500000	8041700000	1070900000	17181000000	11075000000	5160800000	1235000000	1733000000	1386100000	927430000	6042100000	2478000000	5754100000	484470000	6101600000	4420500000	17572000000	7765200000	2451600000
E7ER44;P02788;E7EQB2;P02788-2	5	Lactotransferrin;Lactoferricin-H;Kaliocin-1;Lactoferroxin-A;Lactoferroxin-B;Lactoferroxin-C	LTF	tr|E7ER44|E7ER44_HUMAN Isoform of P02788, Lactotransferrin OS=Homo sapiens OX=9606 GN=LTF PE=1 SV=1;sp|P02788|TRFL_HUMAN Lactotransferrin OS=Homo sapiens OX=9606 GN=LTF PE=1 SV=6;tr|E7EQB2|E7EQB2_HUMAN Isoform of P02788, Lactotransferrin (Fragment) OS=Homo	818380000	1132900000	737830000	248180000	93084000	981490000	68086000	1153400000	310060000	716320000	675670000	452660000	782610000	146120000	2075600000	1096500000	624720000	6332300000	122340000	1091500000	395280000	1854100000	1162100000	4445000000	2209000000	223740000	428810000	3305000000	697120000	799500000	1268900000	312350000	254040000	641570000	765490000	99796000	841560000	81930000	893720000	520500000	3006100000	2315700000	13419000000	1154700000	931010000
P23381;P23381-2	27	Tryptophan--tRNA ligase, cytoplasmic;T1-TrpRS;T2-TrpRS	WARS	sp|P23381|SYWC_HUMAN Tryptophan--tRNA ligase, cytoplasmic OS=Homo sapiens OX=9606 GN=WARS PE=1 SV=2;sp|P23381-2|SYWC-2_HUMAN Isoform of P23381, Isoform 2 of Tryptophan--tRNA ligase, cytoplasmic OS=Homo sapiens OX=9606 GN=WARS PE=1 SV=2	640290000	4604800000	3226200000	2186900000	2008600000	3910600000	2934900000	3172300000	2184600000	8291200000	2486800000	653550000	7354700000	1247400000	3153900000	3180600000	4811100000	395460000	1723000000	2462800000	2458100000	1106600000	1809600000	3338700000	3046100000	1164800000	5504200000	10588000000	492530000	1258200000	17567000000	2656000000	4875200000	1704600000	1090600000	130920000	5496200000	716530000	7165000000	2538400000	6743400000	2050000000	5513900000	3385600000	7478200000
P06753-5;P06753-7	2	Tropomyosin alpha-3 chain	TPM3	sp|P06753-5|TPM3-5_HUMAN Isoform of P06753, Isoform 5 of Tropomyosin alpha-3 chain OS=Homo sapiens OX=9606 GN=TPM3 PE=1 SV=2;sp|P06753-7|TPM3-7_HUMAN Isoform of P06753, Isoform 7 of Tropomyosin alpha-3 chain OS=Homo sapiens OX=9606 GN=TPM3 PE=1 SV=2	783580000	1496400000	535130000	880830000	470980000	1936000000	1026200000	4067600000	541020000	2355500000	4218000000	79856000	4643700000	355840000	3377200000	9443100000	9568700000	1409500000	787220000	6547100000	1502300000	5652000000	3590500000	9223900000	7907900000	374530000	5012100000	10541000000	3073700000	3293600000	3009500000	303380000	1176000000	1365200000	1026500000	172530000	1082000000	16220000	1551100000	1852600000	1614500000	5547600000	7286300000	6784900000	8117000000
[truncated: 5,337 more rows]
[truncated: 64 more columns]

## Sheet: ADvsNCI_NeuroPro
Protein IDs	Number of proteins	Protein names	Gene names	dfPPI Change @ t < 0.25 AD_vs_NCI	Increased	Decreased	Inconsistent	Status	Map NeuroPro to dfPPI @ FC > 1	Map NeuroPro to dfPPI @ FC > 1 & ttest < 0.25
P11142;P11142-2	6	Heat shock cognate 71 kDa protein	HSPA8	Increased					No change	No change					HS_FC > 1	HS_FC > 1 & ttest < 0.25
P10809	8	60 kDa heat shock protein, mitochondrial	HSPD1	No change		TRUE		TRUE	Decreased					No change	1990	1033
P14625	6	Endoplasmin	HSP90B1	No change					No change					Inconsistent	54	31
Q16543;K7EKQ2;K7EQA9	4	Hsp90 co-chaperone Cdc37;Hsp90 co-chaperone Cdc37, N-terminally processed	CDC37	No change					No change					Decreased	246	123
[truncated: 4,182 more rows]
