# Supplementary material for: Systems-Level Interactome Mapping Reveals Actionable Protein Network Dysregulation Across the Alzheimer's Disease Spectrum
Source: Research Square preprint supplement (doi:10.21203/rs.3.rs-5930673/v1), 2025-02-12
Supplement: Supplementary file 3 [file 9a78790292b49adc62deab39.xlsx]

## Sheet: GlutamatergicSynapse
Gene name	mapped	log2MCI-log2NCI	log2AD-log2MCI	log2MCI-log2AD	log2AD-log2NCI	log2PD-log2NCI	APP>WT 250	FC_ttest	NeuroPro		Protein names					Term name KEGG				log2MCI-log2NCI	log2AD-log2NCI	log2AD-log2MCI	log2PD-log2NCI		APP>WT 250	NeuroPro
ADCY3	x AC	0.298422	0.52411	-0.52411	0.822532	0.22256			NA		Adenylate cyclase type 3					Glutamatergic synapse				0.298422	0.822532	0.52411	0.22256			NA		ADCY3
ADCY8	x AC	1.84459	0.0708106	-0.0708106	1.9154	0.407493			NA		Adenylate cyclase type 8					Glutamatergic synapse				1.84459	1.9154	0.0708106	0.407493			NA		ADCY8
ADCY9	x AC	2.11419	-1.61013	1.61013	0.504057	-0.986366	TRUE	FALSE	No change		Adenylate cyclase type 9					Glutamatergic synapse				2.11419	0.504057	-1.61013	-0.986366		TRUE	No change		ADCY9
GLS	x	1.81069	-3.37899	3.37899	-1.56829	-1.9039	TRUE	TRUE	Decreased		Glutaminase kidney isoform, mitochondrial					Glutamatergic synapse				1.81069	-1.56829	-3.37899	-1.9039		TRUE	Decreased		GLS
GLS2	x	2.63244	-1.57583	1.57583	1.05661	-1.43409	TRUE	FALSE	No change		Glutaminase liver isoform, mitochondrial					Glutamatergic synapse				2.63244	1.05661	-1.57583	-1.43409		TRUE	No change		GLS2
GLUL	x GLNS	-0.0445743	0.920811	-0.920811	0.876236	0.0440619	FALSE	FALSE	No change		Glutamine synthetase					Glutamatergic synapse				-0.0445743	0.876236	0.920811	0.0440619		FALSE	No change		GLUL
GNAI2	x Gi/o	0.7568	-0.15949	0.15949	0.59731	-0.565202	TRUE	TRUE	Decreased		Guanine nucleotide-binding protein G(i) subunit alpha-2					Glutamatergic synapse				0.7568	0.59731	-0.15949	-0.565202		TRUE	Decreased		GNAI2
GNAI3	x Gi/o	0.461459	1.3167	-1.3167	1.77816	-0.764349	FALSE	FALSE	No change		Guanine nucleotide-binding protein G(k) subunit alpha					Glutamatergic synapse				0.461459	1.77816	1.3167	-0.764349		FALSE	No change		GNAI3
GNAO1	x Gi/o	0.598703	-0.0220543	0.0220543	0.576649	-1.05151	TRUE	TRUE	No change		Guanine nucleotide-binding protein G(o) subunit alpha					Glutamatergic synapse				0.598703	0.576649	-0.0220543	-1.05151		TRUE	No change		GNAO1
GNAQ	x Gq	1.02265	-0.401955	0.401955	0.620691	-0.765044	TRUE	TRUE	No change		Guanine nucleotide-binding protein G(q) subunit alpha					Glutamatergic synapse				1.02265	0.620691	-0.401955	-0.765044		TRUE	No change		GNAQ
GNB1	x Gi/o	0.998837	-0.140183	0.140183	0.858654	-0.492825			Decreased		Guanine nucleotide-binding protein G(I)/G(S)/G(T) subunit beta-1					Glutamatergic synapse				0.998837	0.858654	-0.140183	-0.492825			Decreased		GNB1
GNB2	x Gi/o	0.595132	-0.941506	0.941506	-0.346374	-0.912921	FALSE	FALSE	Inconsistent		Guanine nucleotide-binding protein G(I)/G(S)/G(T) subunit beta-2					Glutamatergic synapse				0.595132	-0.346374	-0.941506	-0.912921		FALSE	Inconsistent		GNB2
GNB4	x Gi/o	0.0653535	1.37855	-1.37855	1.4439	-0.951102	TRUE	TRUE	No change		Guanine nucleotide-binding protein subunit beta-4					Glutamatergic synapse				0.0653535	1.4439	1.37855	-0.951102		TRUE	No change		GNB4
GNG12	x Gi/o	2.278	-0.624488	0.624488	1.65352	-0.50153	FALSE	FALSE	Increased		Guanine nucleotide-binding protein G(I)/G(S)/G(O) subunit gamma-12					Glutamatergic synapse				2.278	1.65352	-0.624488	-0.50153		FALSE	Increased		GNG12
GNG2	x Gi/o	1.61249	0.47752	-0.47752	2.09001	-0.618395	TRUE	TRUE	No change		Guanine nucleotide-binding protein subunit gamma;Guanine nucleotide-binding protein G(I)/G(S)/G(O) subunit gamma-2					Glutamatergic synapse				1.61249	2.09001	0.47752	-0.618395		TRUE	No change		GNG2
GNG3	x Gi/o	3.05904	1.28653	-1.28653	4.34557	-0.842199	TRUE	TRUE	No change		Guanine nucleotide-binding protein G(I)/G(S)/G(O) subunit gamma-3					Glutamatergic synapse				3.05904	4.34557	1.28653	-0.842199		TRUE	No change		GNG3
GRIA2	x AMPA	0.499591	0.778944	-0.778944	1.27853	-1.17083	TRUE	TRUE	Decreased		Glutamate receptor 2					Glutamatergic synapse				0.499591	1.27853	0.778944	-1.17083		TRUE	Decreased		GRIA2
GRIN2C	x NMDAR	1.88144	-0.788661	0.788661	1.09278	-0.0337006			No change		Glutamate receptor ionotropic, NMDA 2C					Glutamatergic synapse				1.88144	1.09278	-0.788661	-0.0337006			No change		GRIN2C
GRM3	x mGluR2/3	1.99358	-0.579538	0.579538	1.41404	0.827288	TRUE	FALSE	Decreased		Metabotropic glutamate receptor 3					Glutamatergic synapse				1.99358	1.41404	-0.579538	0.827288		TRUE	Decreased		GRM3
HOMER2	x	1.20802	-0.467926	0.467926	0.740098	-1.17357			No change		Homer protein homolog 2					Glutamatergic synapse				1.20802	0.740098	-0.467926	-1.17357			No change		HOMER2
HOMER3	x	2.61709	-0.775807	0.775807	1.84128	2.02855			NA		Homer protein homolog 3					Glutamatergic synapse				2.61709	1.84128	-0.775807	2.02855			NA		HOMER3
ITPR1	x IP3R	0.976133	-0.916229	0.916229	0.0599039	-1.08105	TRUE	TRUE	No change		Inositol 1,4,5-trisphosphate receptor type 1					Glutamatergic synapse				0.976133	0.0599039	-0.916229	-1.08105		TRUE	No change		ITPR1
ITPR2	x IP3R	2.00246	-0.363586	0.363586	1.63888	-1.21547			No change		Inositol 1,4,5-trisphosphate receptor type 2					Glutamatergic synapse				2.00246	1.63888	-0.363586	-1.21547			No change		ITPR2
LZTS3	x	1.6217	-1.1846	1.1846	0.437093	-0.35277			No change		Leucine zipper putative tumor suppressor 3					Glutamatergic synapse				1.6217	0.437093	-1.1846	-0.35277			No change		LZTS3
MAPK1	x ERK1/2	0.710409	0.569556	-0.569556	1.27997	-0.428178	TRUE	TRUE	Increased		Mitogen-activated protein kinase 1					Glutamatergic synapse				0.710409	1.27997	0.569556	-0.428178		TRUE	Increased		MAPK1
MAPK3	x ERK1/2	0.80299	0.56841	-0.56841	1.3714	-0.288171	TRUE	TRUE	No change		Mitogen-activated protein kinase 3;Mitogen-activated protein kinase					Glutamatergic synapse				0.80299	1.3714	0.56841	-0.288171		TRUE	No change		MAPK3
PLA2G4B	x PLA2	0.0654198	1.17067	-1.17067	1.23609	-0.232297			NA		Cytosolic phospholipase A2 beta					Glutamatergic synapse				0.0654198	1.23609	1.17067	-0.232297			NA		PLA2G4B
PLA2G4D	x PLA2	4.95702	-1.71069	1.71069	3.24633	1.41238			NA		Cytosolic phospholipase A2 delta					Glutamatergic synapse				4.95702	3.24633	-1.71069	1.41238			NA		PLA2G4D
PLCB3	x PLC	4.63601	-2.6687	2.6687	1.96731	0.619227			NA		1-phosphatidylinositol 4,5-bisphosphate phosphodiesterase beta-3					Glutamatergic synapse				4.63601	1.96731	-2.6687	0.619227			NA		PLCB3
PPP3CA	x PP2B	0.69376	0.213052	-0.213052	0.906812	-0.260735	FALSE	FALSE	No change		Serine/threonine-protein phosphatase 2B catalytic subunit alpha isoform					Glutamatergic synapse				0.69376	0.906812	0.213052	-0.260735		FALSE	No change		PPP3CA
PPP3CB	x PP2B	1.10332	0.150064	-0.150064	1.25338	-0.18169	FALSE	FALSE	Decreased		Serine/threonine-protein phosphatase 2B catalytic subunit beta isoform;Serine/threonine-protein phosphatase					Glutamatergic synapse				1.10332	1.25338	0.150064	-0.18169		FALSE	Decreased		PPP3CB
PPP3CC	x PP2B	-0.211577	2.31674	-2.31674	2.10516	-0.2008	TRUE	TRUE	NA		Serine/threonine-protein phosphatase 2B catalytic subunit gamma isoform;Serine/threonine-protein phosphatase					Glutamatergic synapse				-0.211577	2.10516	2.31674	-0.2008		TRUE	NA		PPP3CC
PPP3R1	x PP2B	1.98473	-0.0219654	0.0219654	1.96277	-0.116797	TRUE		No change		Calcineurin subunit B type 1					Glutamatergic synapse				1.98473	1.96277	-0.0219654	-0.116797		TRUE	No change		PPP3R1
PRKACB	x PKA	0.779822	-1.198	1.198	-0.418174	0.166269	TRUE	TRUE	No change		cAMP-dependent protein kinase catalytic subunit beta					Glutamatergic synapse				0.779822	-0.418174	-1.198	0.166269		TRUE	No change		PRKACB
SHANK1	x	1.77568	-1.18423	1.18423	0.591451	0.428929	FALSE	FALSE	No change		SH3 and multiple ankyrin repeat domains protein 1					Glutamatergic synapse				1.77568	0.591451	-1.18423	0.428929		FALSE	No change		SHANK1
SLC17A7	x vGLUT	1.55468	-0.0462392	0.0462392	1.50844	-0.501559	TRUE	TRUE	Decreased		Vesicular glutamate transporter 1					Glutamatergic synapse				1.55468	1.50844	-0.0462392	-0.501559		TRUE	Decreased		SLC17A7
SLC1A2	x EAAT	1.54861	-0.720534	0.720534	0.828073	-0.874767	FALSE	FALSE	No change		Excitatory amino acid transporter 2;Amino acid transporter					Glutamatergic synapse				1.54861	0.828073	-0.720534	-0.874767		FALSE	No change		SLC1A2
SLC38A3	x SN1	1.56216	0.0110924	-0.0110924	1.57326	0.538041	FALSE	FALSE	No change		Sodium-coupled neutral amino acid transporter 3					Glutamatergic synapse				1.56216	1.57326	0.0110924	0.538041		FALSE	No change		SLC38A3

## Sheet: TransmissionChemSynapse
Gene name	mapped	log2MCI-log2NCI	log2AD-log2NCI	log2AD-log2MCI		log2PD-log2NCI	APP>WT 250	FC_ttest	NeuroPro								log2MCI-log2NCI	log2AD-log2NCI	log2AD-log2MCI	log2PD-log2NCI	APP>WT 250	NeuroPro
ACTN2		2.30405	2.82159	0.517543		-0.44492	FALSE	FALSE	Decreased		Alpha-actinin-2	Transmission across Chemical Synapses					2.30405	2.82159	0.517543	-0.44492	FALSE	Decreased
ADCY3		0.298422	0.822532	0.52411		0.22256			NA		Adenylate cyclase type 3	Transmission across Chemical Synapses					0.298422	0.822532	0.52411	0.22256		NA
ADCY8		1.84459	1.9154	0.0708106		0.407493			NA		Adenylate cyclase type 8	Transmission across Chemical Synapses					1.84459	1.9154	0.0708106	0.407493		NA
ADCY9		2.11419	0.504057	-1.61013		-0.986366	TRUE	FALSE	No change		Adenylate cyclase type 9	Transmission across Chemical Synapses					2.11419	0.504057	-1.61013	-0.986366	TRUE	No change
AKAP5		1.09932	0.662113	-0.437203		0.636762	TRUE	TRUE	Decreased		A-kinase anchor protein 5	Transmission across Chemical Synapses					1.09932	0.662113	-0.437203	0.636762	TRUE	Decreased
ALDH2		0.193686	0.780904	0.587218		-0.792647	TRUE	TRUE	No change		Aldehyde dehydrogenase, mitochondrial	Transmission across Chemical Synapses					0.193686	0.780904	0.587218	-0.792647	TRUE	No change
AP2A1		0.93644	0.5676	-0.36884		-0.197704	TRUE	TRUE	Decreased		AP-2 complex subunit alpha-1	Transmission across Chemical Synapses					0.93644	0.5676	-0.36884	-0.197704	TRUE	Decreased
ARHGEF9		-0.450453	1.69859	2.14904		-1.48161			No change		Rho guanine nucleotide exchange factor 9	Transmission across Chemical Synapses					-0.450453	1.69859	2.14904	-1.48161		No change
ARL6IP5		0.428622	0.974652	0.546031		-0.523647	TRUE	TRUE	No change		PRA1 family protein 3	Transmission across Chemical Synapses					0.428622	0.974652	0.546031	-0.523647	TRUE	No change
CACNA1B		0.825916	0.751915	-0.0740016		-0.101931			No change		Voltage-dependent N-type calcium channel subunit alpha-1B	Transmission across Chemical Synapses					0.825916	0.751915	-0.0740016	-0.101931		No change
CACNA2D2		1.20957	1.41532	0.205749		0.110143			NA		Voltage-dependent calcium channel subunit alpha-2/delta-2;Voltage-dependent calcium channel subunit alpha-2-2;Voltage-dependent calcium channel subunit delta-2	Transmission across Chemical Synapses					1.20957	1.41532	0.205749	0.110143		NA
CACNA2D3		2.11021	0.961612	-1.1486		-0.843629	TRUE	FALSE	No change		Voltage-dependent calcium channel subunit alpha-2/delta-3;Voltage-dependent calcium channel subunit alpha-2-3;Voltage-dependent calcium channel subunit delta-3	Transmission across Chemical Synapses					2.11021	0.961612	-1.1486	-0.843629	TRUE	No change
CAMK2A		1.46027	3.07286	1.61259		-0.433347	TRUE	TRUE	Decreased		Calcium/calmodulin-dependent protein kinase type II subunit alpha	Transmission across Chemical Synapses					1.46027	3.07286	1.61259	-0.433347	TRUE	Decreased
CAMK2B		1.28074	1.93418	0.653442		-0.540851	FALSE	FALSE	No change		Calcium/calmodulin-dependent protein kinase type II subunit beta	Transmission across Chemical Synapses					1.28074	1.93418	0.653442	-0.540851	FALSE	No change
CASK		1.72463	1.05191	-0.672722		-0.703814	TRUE	FALSE	No change		Peripheral plasma membrane protein CASK	Transmission across Chemical Synapses					1.72463	1.05191	-0.672722	-0.703814	TRUE	No change
DLG2		0.774987	0.831456	0.0564688		0.136356	TRUE	FALSE	Decreased		Disks large homolog 2	Transmission across Chemical Synapses					0.774987	0.831456	0.0564688	0.136356	TRUE	Decreased
DLG3		0.680717	0.198207	-0.482509		0.0513865			Decreased		Disks large homolog 3	Transmission across Chemical Synapses					0.680717	0.198207	-0.482509	0.0513865		Decreased
EPB41L1		1.32031	-1.01781	-2.33813		-0.153968			No change		Band 4.1-like protein 1	Transmission across Chemical Synapses					1.32031	-1.01781	-2.33813	-0.153968		No change
GLS		1.81069	-1.56829	-3.37899		-1.9039	TRUE	TRUE	Decreased		Glutaminase kidney isoform, mitochondrial	Transmission across Chemical Synapses					1.81069	-1.56829	-3.37899	-1.9039	TRUE	Decreased
GLS2		2.63244	1.05661	-1.57583		-1.43409	TRUE	FALSE	No change		Glutaminase liver isoform, mitochondrial	Transmission across Chemical Synapses					2.63244	1.05661	-1.57583	-1.43409	TRUE	No change
GLUL		-0.0445743	0.876236	0.920811		0.0440619	FALSE	FALSE	No change		Glutamine synthetase	Transmission across Chemical Synapses					-0.0445743	0.876236	0.920811	0.0440619	FALSE	No change
GNAI2		0.7568	0.59731	-0.15949		-0.565202	TRUE	TRUE	Decreased		Guanine nucleotide-binding protein G(i) subunit alpha-2	Transmission across Chemical Synapses					0.7568	0.59731	-0.15949	-0.565202	TRUE	Decreased
GNAI3		0.461459	1.77816	1.3167		-0.764349	FALSE	FALSE	No change		Guanine nucleotide-binding protein G(k) subunit alpha	Transmission across Chemical Synapses					0.461459	1.77816	1.3167	-0.764349	FALSE	No change
GNB1		0.998837	0.858654	-0.140183		-0.492825			Decreased		Guanine nucleotide-binding protein G(I)/G(S)/G(T) subunit beta-1	Transmission across Chemical Synapses					0.998837	0.858654	-0.140183	-0.492825		Decreased
GNB2		0.595132	-0.346374	-0.941506		-0.912921	FALSE	FALSE	Inconsistent		Guanine nucleotide-binding protein G(I)/G(S)/G(T) subunit beta-2	Transmission across Chemical Synapses					0.595132	-0.346374	-0.941506	-0.912921	FALSE	Inconsistent
GNB4		0.0653535	1.4439	1.37855		-0.951102	TRUE	TRUE	No change		Guanine nucleotide-binding protein subunit beta-4	Transmission across Chemical Synapses					0.0653535	1.4439	1.37855	-0.951102	TRUE	No change
GNG12		2.278	1.65352	-0.624488		-0.50153	FALSE	FALSE	Increased		Guanine nucleotide-binding protein G(I)/G(S)/G(O) subunit gamma-12	Transmission across Chemical Synapses					2.278	1.65352	-0.624488	-0.50153	FALSE	Increased
GNG2		1.61249	2.09001	0.47752		-0.618395	TRUE	TRUE	No change		Guanine nucleotide-binding protein subunit gamma;Guanine nucleotide-binding protein G(I)/G(S)/G(O) subunit gamma-2	Transmission across Chemical Synapses					1.61249	2.09001	0.47752	-0.618395	TRUE	No change
GNG3		3.05904	4.34557	1.28653		-0.842199	TRUE	TRUE	No change		Guanine nucleotide-binding protein G(I)/G(S)/G(O) subunit gamma-3	Transmission across Chemical Synapses					3.05904	4.34557	1.28653	-0.842199	TRUE	No change
GRIA2		0.499591	1.27853	0.778944		-1.17083	TRUE	TRUE	Decreased		Glutamate receptor 2	Transmission across Chemical Synapses					0.499591	1.27853	0.778944	-1.17083	TRUE	Decreased
GRIN2C		1.88144	1.09278	-0.788661		-0.0337006			No change		Glutamate receptor ionotropic, NMDA 2C	Transmission across Chemical Synapses					1.88144	1.09278	-0.788661	-0.0337006		No change
HSPA8		0.856817	0.848854	-0.00796304		-0.469185	FALSE	FALSE	No change		Heat shock cognate 71 kDa protein	Transmission across Chemical Synapses					0.856817	0.848854	-0.00796304	-0.469185	FALSE	No change
LIN7A		2.57629	1.55731	-1.01897		0.173534	TRUE	TRUE	No change		Protein lin-7 homolog A	Transmission across Chemical Synapses					2.57629	1.55731	-1.01897	0.173534	TRUE	No change
LIN7B		1.92518	1.39282	-0.532355		-1.28264	TRUE	TRUE	No change		Protein lin-7 homolog B	Transmission across Chemical Synapses					1.92518	1.39282	-0.532355	-1.28264	TRUE	No change
LIN7C		0.889281	0.841	-0.0482808		-0.755561	TRUE	TRUE	No change		Protein lin-7 homolog C	Transmission across Chemical Synapses					0.889281	0.841	-0.0482808	-0.755561	TRUE	No change
MAPK1		0.710409	1.27997	0.569556		-0.428178	TRUE	TRUE	Increased		Mitogen-activated protein kinase 1	Transmission across Chemical Synapses					0.710409	1.27997	0.569556	-0.428178	TRUE	Increased
MAPK3		0.80299	1.3714	0.56841		-0.288171	TRUE	TRUE	No change		Mitogen-activated protein kinase 3;Mitogen-activated protein kinase	Transmission across Chemical Synapses					0.80299	1.3714	0.56841	-0.288171	TRUE	No change
NEFL		0.837804	1.48484	0.647038		-0.574581	FALSE	FALSE	Increased		Neurofilament light polypeptide	Transmission across Chemical Synapses					0.837804	1.48484	0.647038	-0.574581	FALSE	Increased
NPTN		3.37324	1.82541	-1.54783		-0.580174	TRUE	TRUE	No change		Neuroplastin	Transmission across Chemical Synapses					3.37324	1.82541	-1.54783	-0.580174	TRUE	No change
NRG1		3.84569	7.46349	3.6178		-0.747134			NA		Pro-neuregulin-1, membrane-bound isoform;Neuregulin-1	Transmission across Chemical Synapses					3.84569	7.46349	3.6178	-0.747134		NA
NRGN		0.91836	1.09287	0.174506		-0.552781	FALSE	FALSE	Inconsistent		Neurogranin;NEUG(55-78)	Transmission across Chemical Synapses					0.91836	1.09287	0.174506	-0.552781	FALSE	Inconsistent
NSF		1.74834	0.748828	-0.999512		-0.265033	TRUE	TRUE	No change		Vesicle-fusing ATPase	Transmission across Chemical Synapses					1.74834	0.748828	-0.999512	-0.265033	TRUE	No change
PLCB3		4.63601	1.96731	-2.6687		0.619227			NA		1-phosphatidylinositol 4,5-bisphosphate phosphodiesterase beta-3	Transmission across Chemical Synapses					4.63601	1.96731	-2.6687	0.619227		NA
PPFIA1		0.947976	1.89157	0.943592		-0.555119			No change		Liprin-alpha-1	Transmission across Chemical Synapses					0.947976	1.89157	0.943592	-0.555119		No change
PPFIA2		1.32088	2.36937	1.04849		-0.067153	FALSE	FALSE	No change		Liprin-alpha-2	Transmission across Chemical Synapses					1.32088	2.36937	1.04849	-0.067153	FALSE	No change
PPM1E		2.21952	-0.926928	-3.14645		0.334622	TRUE	TRUE	Decreased		Protein phosphatase 1E	Transmission across Chemical Synapses					2.21952	-0.926928	-3.14645	0.334622	TRUE	Decreased
PPM1F		0.534849	0.744163	0.209314		0.177699	TRUE	FALSE	No change		Protein phosphatase 1F	Transmission across Chemical Synapses					0.534849	0.744163	0.209314	0.177699	TRUE	No change
PRKAA1		1.4466	1.54732	0.100724		1.17886	TRUE	FALSE	No change		5-AMP-activated protein kinase catalytic subunit alpha-1	Transmission across Chemical Synapses					1.4466	1.54732	0.100724	1.17886	TRUE	No change
PRKACB		0.779822	-0.418174	-1.198		0.166269	TRUE	TRUE	No change		cAMP-dependent protein kinase catalytic subunit beta	Transmission across Chemical Synapses					0.779822	-0.418174	-1.198	0.166269	TRUE	No change
PRKAR1A		0.916198	0.682003	-0.234194		-0.560842	TRUE	FALSE	No change		cAMP-dependent protein kinase type I-alpha regulatory subunit;cAMP-dependent protein kinase type I-alpha regulatory subunit, N-terminally processed	Transmission across Chemical Synapses					0.916198	0.682003	-0.234194	-0.560842	TRUE	No change
RPS6KA2		1.15982	2.23482	1.07501		-0.183713	TRUE	TRUE	Increased		Ribosomal protein S6 kinase;Ribosomal protein S6 kinase alpha-2	Transmission across Chemical Synapses					1.15982	2.23482	1.07501	-0.183713	TRUE	Increased
SLC17A7		1.55468	1.50844	-0.0462392		-0.501559	TRUE	TRUE	Decreased		Vesicular glutamate transporter 1	Transmission across Chemical Synapses					1.55468	1.50844	-0.0462392	-0.501559	TRUE	Decreased
SLC1A2		1.54861	0.828073	-0.720534		-0.874767	FALSE	FALSE	No change		Excitatory amino acid transporter 2;Amino acid transporter	Transmission across Chemical Synapses					1.54861	0.828073	-0.720534	-0.874767	FALSE	No change
SLC22A2		-0.0886357	0.915591	1.00423		-0.680197			NA		Solute carrier family 22 member 2	Transmission across Chemical Synapses					-0.0886357	0.915591	1.00423	-0.680197		NA
SLC32A1		1.27294	1.58878	0.315839		-0.178498	TRUE	TRUE	No change		Vesicular inhibitory amino acid transporter	Transmission across Chemical Synapses					1.27294	1.58878	0.315839	-0.178498	TRUE	No change
SLC6A1		0.753627	1.77976	1.02613		-1.53222	TRUE	TRUE	No change		Sodium- and chloride-dependent GABA transporter 1	Transmission across Chemical Synapses					0.753627	1.77976	1.02613	-1.53222	TRUE	No change
SRC		0.88869	0.970362	0.0816722		-1.06783	TRUE	TRUE	No change		Proto-oncogene tyrosine-protein kinase Src	Transmission across Chemical Synapses					0.88869	0.970362	0.0816722	-1.06783	TRUE	No change
STX1A		2.95232	0.640811	-2.31151		-0.23266	TRUE	TRUE	Decreased		Syntaxin-1A	Transmission across Chemical Synapses					2.95232	0.640811	-2.31151	-0.23266	TRUE	Decreased
SYN1		0.231461	0.728523	0.497062		-0.15035	TRUE	TRUE	Decreased		Synapsin-1	Transmission across Chemical Synapses					0.231461	0.728523	0.497062	-0.15035	TRUE	Decreased
SYN2		0.715073	1.00868	0.293603		-0.129655	TRUE	TRUE	No change		Synapsin-2	Transmission across Chemical Synapses					0.715073	1.00868	0.293603	-0.129655	TRUE	No change
SYT1		1.55758	0.794138	-0.763446		-0.505165	TRUE	TRUE	Decreased		Synaptotagmin-1	Transmission across Chemical Synapses					1.55758	0.794138	-0.763446	-0.505165	TRUE	Decreased
TSPAN7		2.48363	1.25748	-1.22615		-2.3447	TRUE	FALSE	No change		Tetraspanin;Tetraspanin-7	Transmission across Chemical Synapses					2.48363	1.25748	-1.22615	-2.3447	TRUE	No change
TUBA1A		0.874938	1.35643	0.481489		-0.10917			No change		Isoform 2 of Tubulin alpha-1A chain	Transmission across Chemical Synapses					0.874938	1.35643	0.481489	-0.10917		No change
TUBA1B		0.936404	1.01406	0.0776547		-0.0312723	TRUE	TRUE	No change		Tubulin alpha-1B chain	Transmission across Chemical Synapses					0.936404	1.01406	0.0776547	-0.0312723	TRUE	No change
TUBA8		0.855463	0.195619	-0.659844		-0.320468	TRUE	TRUE	No change		Tubulin alpha-8 chain	Transmission across Chemical Synapses					0.855463	0.195619	-0.659844	-0.320468	TRUE	No change
TUBB1		1.75363	1.72558	-0.0280433		1.03632	FALSE	FALSE	No change		Tubulin beta-1 chain	Transmission across Chemical Synapses					1.75363	1.72558	-0.0280433	1.03632	FALSE	No change
TUBB2A		1.19809	0.971837	-0.226254		-0.119447	TRUE	TRUE	No change		Tubulin beta-2A chain	Transmission across Chemical Synapses					1.19809	0.971837	-0.226254	-0.119447	TRUE	No change
TUBB2B		2.08718	1.18346	-0.903721		-0.273996	TRUE	FALSE	No change		Tubulin beta-2B chain	Transmission across Chemical Synapses					2.08718	1.18346	-0.903721	-0.273996	TRUE	No change
TUBB3		0.704135	1.05491	0.350771		-0.0231014	TRUE	FALSE	Decreased		Tubulin beta-3 chain	Transmission across Chemical Synapses					0.704135	1.05491	0.350771	-0.0231014	TRUE	Decreased
TUBB4A		1.27134	0.551247	-0.720093		-0.227206	TRUE	FALSE	No change		Tubulin beta-4A chain	Transmission across Chemical Synapses					1.27134	0.551247	-0.720093	-0.227206	TRUE	No change
TUBB6		1.95959	2.51922	0.559635		0.592069	TRUE	TRUE	No change		Tubulin beta-6 chain	Transmission across Chemical Synapses					1.95959	2.51922	0.559635	0.592069	TRUE	No change
TUBB8		0.69218	1.97636	1.28418		0.324617			No change		Tubulin beta-8 chain	Transmission across Chemical Synapses					0.69218	1.97636	1.28418	0.324617		No change
UNC13B		1.35404	0.062731	-1.29131		0.0364331			No change		Isoform of O14795, Protein unc-13 homolog B	Transmission across Chemical Synapses					1.35404	0.062731	-1.29131	0.0364331		No change
VAMP2		0.890736	0.593357	-0.297379		-0.453045	TRUE	TRUE	Decreased		Vesicle-associated membrane protein 2	Transmission across Chemical Synapses					0.890736	0.593357	-0.297379	-0.453045	TRUE	Decreased

## Sheet: AxonGuidance
	mapped	log2MCI-log2NCI	log2AD-log2MCI	log2MCI-log2AD	log2AD-log2NCI	log2PD-log2NCI	APP>WT 250	FC_ttest	NeuroPro		Protein names			Term name KEGG																		log2MCI-log2NCI	log2AD-log2NCI	log2AD-log2MCI	log2PD-log2NCI	APP>WT 250	NeuroPro
ABLIM1	x	2.25956	0.394354	-0.394354	2.65392	0.229926	TRUE	FALSE	No change		Actin-binding LIM protein 1			Axon guidance																		2.25956	2.65392	0.394354	0.229926	TRUE	No change		ABLIM1
ARHGEF12	x LARG	-0.662534	2.13643	-2.13643	1.4739	-0.952806	FALSE	FALSE	NA		Rho guanine nucleotide exchange factor 12			Axon guidance																		-0.662534	1.4739	2.13643	-0.952806	FALSE	NA		ARHGEF12
CAMK2A	x CAMKII	1.46027	1.61259	-1.61259	3.07286	-0.433347	TRUE	TRUE	Decreased		Calcium/calmodulin-dependent protein kinase type II subunit alpha			Axon guidance																		1.46027	3.07286	1.61259	-0.433347	TRUE	Decreased		CAMK2A
CAMK2B	x CAMKII	1.28074	0.653442	-0.653442	1.93418	-0.540851	FALSE	FALSE	No change		Calcium/calmodulin-dependent protein kinase type II subunit beta			Axon guidance																		1.28074	1.93418	0.653442	-0.540851	FALSE	No change		CAMK2B
ENAH	x Mena	1.12325	-0.496877	0.496877	0.62637	0.178839	TRUE	FALSE	No change		Protein enabled homolog			Axon guidance																		1.12325	0.62637	-0.496877	0.178839	TRUE	No change		ENAH
EPHB2	x EphB	-0.149851	1.61158	-1.61158	1.46173	1.18264			No change		Ephrin type-B receptor 2;Receptor protein-tyrosine kinase			Axon guidance																		-0.149851	1.46173	1.61158	1.18264		No change		EPHB2
GNAI2	x Gi	0.7568	-0.15949	0.15949	0.59731	-0.565202	TRUE	TRUE	Decreased		Guanine nucleotide-binding protein G(i) subunit alpha-2			Axon guidance																		0.7568	0.59731	-0.15949	-0.565202	TRUE	Decreased		GNAI2
GNAI3	x Gi	0.461459	1.3167	-1.3167	1.77816	-0.764349	FALSE	FALSE	No change		Guanine nucleotide-binding protein G(k) subunit alpha			Axon guidance																		0.461459	1.77816	1.3167	-0.764349	FALSE	No change		GNAI3
ITGB1	x	2.00656	0.569375	-0.569375	2.57594	-0.241813			Increased		Integrin beta-1			Axon guidance																		2.00656	2.57594	0.569375	-0.241813		Increased		ITGB1
KRAS	x Ras	-5.182	6.91042	-6.91042	1.72842	-0.896781	TRUE	TRUE	Decreased		GTPase KRas;GTPase KRas, N-terminally processed			Axon guidance																		-5.182	1.72842	6.91042	-0.896781	TRUE	Decreased		KRAS
L1CAM	x	0.648925	0.77859	-0.77859	1.42751	-0.285229			No change		Neural cell adhesion molecule L1			Axon guidance																		0.648925	1.42751	0.77859	-0.285229		No change		L1CAM
LIMK1	x LIMK	0.487994	2.00372	-2.00372	2.49171	-0.965666	FALSE	FALSE	NA		LIM domain kinase 1			Axon guidance																		0.487994	2.49171	2.00372	-0.965666	FALSE	NA		LIMK1
MAPK1	x ERK	0.710409	0.569556	-0.569556	1.27997	-0.428178	TRUE	TRUE	Increased		Mitogen-activated protein kinase 1			Axon guidance																		0.710409	1.27997	0.569556	-0.428178	TRUE	Increased		MAPK1
MAPK3	x ERK	0.80299	0.56841	-0.56841	1.3714	-0.288171	TRUE	TRUE	No change		Mitogen-activated protein kinase 3;Mitogen-activated protein kinase			Axon guidance																		0.80299	1.3714	0.56841	-0.288171	TRUE	No change		MAPK3
MYL12A	x MLC2	2.74461	-1.02502	1.02502	1.71959	-0.440915			No change		Myosin regulatory light chain 12A;Myosin regulatory light chain 12B			Axon guidance																		2.74461	1.71959	-1.02502	-0.440915		No change		MYL12A
NEO1	x	1.89827	-0.428443	0.428443	1.46983	0.32661			No change		Neogenin			Axon guidance																		1.89827	1.46983	-0.428443	0.32661		No change		NEO1
NFATC3	x NFAT	1.67283	-0.428063	0.428063	1.24477	-1.15381			NA		Nuclear factor of activated T-cells, cytoplasmic 3			Axon guidance																		1.67283	1.24477	-0.428063	-1.15381		NA		NFATC3
NGEF	x Ephexin	-0.254333	0.935517	-0.935517	0.681183	-0.338882	FALSE	FALSE	Decreased		Ephexin-1			Axon guidance																		-0.254333	0.681183	0.935517	-0.338882	FALSE	Decreased		NGEF
NRP1	x	2.56124	-1.98877	1.98877	0.572477	-1.031			No change		Neuropilin-1			Axon guidance																		2.56124	0.572477	-1.98877	-1.031		No change		NRP1
NTNG1	x Netrin G1	3.03587	-1.42242	1.42242	1.61344	1.93183			No change		Netrin-G1			Axon guidance																		3.03587	1.61344	-1.42242	1.93183		No change		NTNG1
PAK6	x PAK	0.000745891	1.6438	-1.6438	1.64455	2.05504			NA		Serine/threonine-protein kinase PAK 6			Axon guidance																		0.000745891	1.64455	1.6438	2.05504		NA		PAK6
PARD3	x Par3	3.40848	-1.58364	1.58364	1.82484	-1.43799			NA		Partitioning defective 3 homolog			Axon guidance																		3.40848	1.82484	-1.58364	-1.43799		NA		PARD3
PIK3CA	x PI3K	1.84814	-2.02487	2.02487	-0.176732	-0.978395	FALSE	FALSE	No change		Phosphatidylinositol 4,5-bisphosphate 3-kinase catalytic subunit alpha isoform			Axon guidance																		1.84814	-0.176732	-2.02487	-0.978395	FALSE	No change		PIK3CA
PIK3CB	x PI3K	1.78126	-1.51208	1.51208	0.269178	-0.234854	FALSE	FALSE	No change		Phosphatidylinositol 4,5-bisphosphate 3-kinase catalytic subunit beta isoform			Axon guidance																		1.78126	0.269178	-1.51208	-0.234854	FALSE	No change		PIK3CB
PIK3CD	x PI3K	2.09835	-0.441592	0.441592	1.65676	0.65374			No change		Phosphatidylinositol 4,5-bisphosphate 3-kinase catalytic subunit delta isoform			Axon guidance																		2.09835	1.65676	-0.441592	0.65374		No change		PIK3CD
PIK3R1	x PI3K	0.98134	-0.810197	0.810197	0.171142	-0.146155	TRUE	FALSE	No change		Phosphatidylinositol 3-kinase regulatory subunit alpha			Axon guidance																		0.98134	0.171142	-0.810197	-0.146155	TRUE	No change		PIK3R1
PLCG1	x PLCgamma	0.555006	0.0826698	-0.0826698	0.637676	-0.381554	FALSE	FALSE	No change		1-phosphatidylinositol 4,5-bisphosphate phosphodiesterase gamma-1			Axon guidance																		0.555006	0.637676	0.0826698	-0.381554	FALSE	No change		PLCG1
PLCG2	x PLCgamma	0.800753	1.38644	-1.38644	2.18719	-0.297584			No change		Phosphoinositide phospholipase C;1-phosphatidylinositol 4,5-bisphosphate phosphodiesterase gamma-2			Axon guidance																		0.800753	2.18719	1.38644	-0.297584		No change		PLCG2
PLXNA1	x Plexin A	0.950184	-0.563853	0.563853	0.386331	-0.225374			Decreased		Plexin-A1			Axon guidance																		0.950184	0.386331	-0.563853	-0.225374		Decreased		PLXNA1
PLXNA2	x Plexin A	2.69425	-1.70632	1.70632	0.987938	-1.134			No change		Plexin-A2			Axon guidance																		2.69425	0.987938	-1.70632	-1.134		No change		PLXNA2
PLXNA4	x Plexin A	1.62551	-0.0062168	0.0062168	1.61929	-0.346301	TRUE	FALSE	Decreased		Plexin-A4			Axon guidance																		1.62551	1.61929	-0.0062168	-0.346301	TRUE	Decreased		PLXNA4
PLXNB1	x Plexin B	0.621718	2.07324	-2.07324	2.69495	-0.612838	FALSE	FALSE	Increased		Plexin-B1			Axon guidance																		0.621718	2.69495	2.07324	-0.612838	FALSE	Increased		PLXNB1
PLXNB2	x Plexin B	1.35525	-0.496631	0.496631	0.858619	-1.26579			No change		Plexin-B2			Axon guidance																		1.35525	0.858619	-0.496631	-1.26579		No change		PLXNB2
PLXNB3	x Plexin B	0.460364	0.351579	-0.351579	0.811942	-1.00589			NA		Plexin-B3			Axon guidance																		0.460364	0.811942	0.351579	-1.00589		NA		PLXNB3
PPP3CA	x CaN	0.69376	0.213052	-0.213052	0.906812	-0.260735	FALSE	FALSE	No change		Serine/threonine-protein phosphatase 2B catalytic subunit alpha isoform			Axon guidance																		0.69376	0.906812	0.213052	-0.260735	FALSE	No change		PPP3CA
PPP3CB	x CaN	1.10332	0.150064	-0.150064	1.25338	-0.18169	FALSE	FALSE	Decreased		Serine/threonine-protein phosphatase 2B catalytic subunit beta isoform;Serine/threonine-protein phosphatase			Axon guidance																		1.10332	1.25338	0.150064	-0.18169	FALSE	Decreased		PPP3CB
PPP3CC	x CaN	-0.211577	2.31674	-2.31674	2.10516	-0.2008	TRUE	TRUE	NA		Serine/threonine-protein phosphatase 2B catalytic subunit gamma isoform;Serine/threonine-protein phosphatase			Axon guidance																		-0.211577	2.10516	2.31674	-0.2008	TRUE	NA		PPP3CC
PPP3R1	x CaN	1.98473	-0.0219654	0.0219654	1.96277	-0.116797	TRUE		No change		Calcineurin subunit B type 1			Axon guidance																		1.98473	1.96277	-0.0219654	-0.116797	TRUE	No change		PPP3R1
PTK2	X FAK	0.445616	0.853014	-0.853014	1.29863	-0.161771			No change		Focal adhesion kinase 1			Axon guidance																		0.445616	1.29863	0.853014	-0.161771		No change		PTK2
RAC2	x Rac	5.24549	-2.95422	2.95422	2.29126	0.0448781			No change		Ras-related C3 botulinum toxin substrate 2			Axon guidance																		5.24549	2.29126	-2.95422	0.0448781		No change		RAC2
RASA1	x RasGAP	1.78795	-1.3113	1.3113	0.476648	-1.07181			No change		Ras GTPase-activating protein 1			Axon guidance																		1.78795	0.476648	-1.3113	-1.07181		No change		RASA1
RGMA	x	1.55273	-0.870261	0.870261	0.682468	0.478221			No change		Repulsive guidance molecule A			Axon guidance																		1.55273	0.682468	-0.870261	0.478221		No change		RGMA
RGS3	x	1.31406	1.86813	-1.86813	3.18219	-0.924436			NA		Regulator of G-protein signaling 3			Axon guidance																		1.31406	3.18219	1.86813	-0.924436		NA		RGS3
RHOA	x	0.800542	0.329304	-0.329304	1.12985	-0.792491	TRUE	TRUE	No change		Transforming protein RhoA			Axon guidance																		0.800542	1.12985	0.329304	-0.792491	TRUE	No change		RHOA
ROBO1	x	1.11331	-0.820999	0.820999	0.292307	-2.00439			No change		Roundabout homolog 1			Axon guidance																		1.11331	0.292307	-0.820999	-2.00439		No change		ROBO1
ROCK1	x	1.30454	0.495907	-0.495907	1.80045	-0.316388	TRUE	FALSE	No change		Rho-associated protein kinase 1			Axon guidance																		1.30454	1.80045	0.495907	-0.316388	TRUE	No change		ROCK1
ROCK2	x	0.971242	-1.06081	1.06081	-0.0895669	-0.0636168			Decreased		Rho-associated protein kinase 2			Axon guidance																		0.971242	-0.0895669	-1.06081	-0.0636168		Decreased		ROCK2
RRAS	x	1.09505	0.240376	-0.240376	1.33542	-1.00864			NA		Ras-related protein R-Ras			Axon guidance																		1.09505	1.33542	0.240376	-1.00864		NA		RRAS
SEMA4A	x	0.636922	1.35998	-1.35998	1.9969	-0.776441			No change		Semaphorin-4A			Axon guidance																		0.636922	1.9969	1.35998	-0.776441		No change		SEMA4A
SEMA4D	x	1.31585	1.08498	-1.08498	2.40084	-1.43886			No change		Semaphorin-4D			Axon guidance																		1.31585	2.40084	1.08498	-1.43886		No change		SEMA4D
SEMA7A	x	2.56627	0.359937	-0.359937	2.92621	0.612933			No change		Semaphorin-7A			Axon guidance																		2.56627	2.92621	0.359937	0.612933		No change		SEMA7A
SRC	x	0.88869	0.0816722	-0.0816722	0.970362	-1.06783	TRUE	TRUE	No change		Proto-oncogene tyrosine-protein kinase Src			Axon guidance																		0.88869	0.970362	0.0816722	-1.06783	TRUE	No change		SRC
SRGAP2	x srGAP	1.6337	-1.29049	1.29049	0.343209	0.146681	FALSE	FALSE	Decreased		SLIT-ROBO Rho GTPase-activating protein 2			Axon guidance																		1.6337	0.343209	-1.29049	0.146681	FALSE	Decreased		SRGAP2
SSH2	x	-0.0484461	1.80046	-1.80046	1.75202	-0.583235	FALSE	FALSE	NA		Protein phosphatase Slingshot homolog 2			Axon guidance																		-0.0484461	1.75202	1.80046	-0.583235	FALSE	NA		SSH2
UNC5A	x	1.24261	-1.02858	1.02858	0.214022	-0.963027			NA		Netrin receptor UNC5A			Axon guidance																		1.24261	0.214022	-1.02858	-0.963027		NA		UNC5A
UNC5B	x	0.973779	0.192503	-0.192503	1.16628	-1.33214			No change		Netrin receptor UNC5B			Axon guidance																		0.973779	1.16628	0.192503	-1.33214		No change		UNC5B

## Sheet: PPI at Synapse
		log2MCI-log2NCI	log2AD-log2NCI	log2AD-log2MCI	log2PD-log2NCI	APP>WT 250	NeuroPro	FC_ttest							log2MCI-log2NCI	log2AD-log2NCI	log2AD-log2MCI	log2PD-log2NCI	APP>WT 250	NeuroPro
APBA2		3.64024	2.85407	-0.786173	1.34595	FALSE	NA	FALSE		Amyloid beta A4 precursor protein-binding family A member 2	Protein-protein interactions at synapses				3.64024	2.85407	-0.786173	1.34595	FALSE	NA		APBA2	Amyloid beta A4 precursor protein-binding family A member 2
CASK		1.72463	1.05191	-0.672722	-0.703814	TRUE	No change	FALSE		Peripheral plasma membrane protein CASK	Protein-protein interactions at synapses				1.72463	1.05191	-0.672722	-0.703814	TRUE	No change		CASK	Peripheral plasma membrane protein CASK
DLG2		0.774987	0.831456	0.0564688	0.136356	TRUE	Decreased	FALSE		Disks large homolog 2	Protein-protein interactions at synapses				0.774987	0.831456	0.0564688	0.136356	TRUE	Decreased		DLG2	Disks large homolog 2
DLG3		0.680717	0.198207	-0.482509	0.0513865		Decreased			Disks large homolog 3	Protein-protein interactions at synapses				0.680717	0.198207	-0.482509	0.0513865		Decreased		DLG3	Disks large homolog 3
DLGAP3		2.53104	-0.390801	-2.92184	-1.02557	FALSE	No change	FALSE		Disks large-associated protein 3	Protein-protein interactions at synapses				2.53104	-0.390801	-2.92184	-1.02557	FALSE	No change		DLGAP3	Disks large-associated protein 3
EPB41L1		1.32031	-1.01781	-2.33813	-0.153968		No change			Band 4.1-like protein 1	Protein-protein interactions at synapses				1.32031	-1.01781	-2.33813	-0.153968		No change		EPB41L1	Band 4.1-like protein 1
EPB41L2		0.782905	0.233566	-0.54934	-0.347843	TRUE	No change	TRUE		Band 4.1-like protein 2	Protein-protein interactions at synapses				0.782905	0.233566	-0.54934	-0.347843	TRUE	No change		EPB41L2	Band 4.1-like protein 2
EPB41L3		0.914259	-0.418662	-1.33292	-0.192901	TRUE	Decreased	FALSE		Band 4.1-like protein 3;Band 4.1-like protein 3, N-terminally processed	Protein-protein interactions at synapses				0.914259	-0.418662	-1.33292	-0.192901	TRUE	Decreased		EPB41L3	Band 4.1-like protein 3;Band 4.1-like protein 3, N-terminally processed
GRIN2C		1.88144	1.09278	-0.788661	-0.0337006		No change			Glutamate receptor ionotropic, NMDA 2C	Protein-protein interactions at synapses				1.88144	1.09278	-0.788661	-0.0337006		No change		GRIN2C	Glutamate receptor ionotropic, NMDA 2C
HOMER2		1.20802	0.740098	-0.467926	-1.17357		No change			Homer protein homolog 2	Protein-protein interactions at synapses				1.20802	0.740098	-0.467926	-1.17357		No change		HOMER2	Homer protein homolog 2
LIN7A		2.57629	1.55731	-1.01897	0.173534	TRUE	No change	TRUE		Protein lin-7 homolog A	Protein-protein interactions at synapses				2.57629	1.55731	-1.01897	0.173534	TRUE	No change		LIN7A	Protein lin-7 homolog A
LIN7B		1.92518	1.39282	-0.532355	-1.28264	TRUE	No change	TRUE		Protein lin-7 homolog B	Protein-protein interactions at synapses				1.92518	1.39282	-0.532355	-1.28264	TRUE	No change		LIN7B	Protein lin-7 homolog B
LIN7C		0.889281	0.841	-0.0482808	-0.755561	TRUE	No change	TRUE		Protein lin-7 homolog C	Protein-protein interactions at synapses				0.889281	0.841	-0.0482808	-0.755561	TRUE	No change		LIN7C	Protein lin-7 homolog C
LRRC4B		2.77724	2.59255	-0.18469	-0.0881339		No change			Leucine-rich repeat-containing protein 4B	Protein-protein interactions at synapses				2.77724	2.59255	-0.18469	-0.0881339		No change		LRRC4B	Leucine-rich repeat-containing protein 4B
LRRTM2		1.25589	0.559115	-0.696773	-0.42988		NA			Leucine-rich repeat transmembrane neuronal protein 2	Protein-protein interactions at synapses				1.25589	0.559115	-0.696773	-0.42988		NA		LRRTM2	Leucine-rich repeat transmembrane neuronal protein 2
LRRTM4		1.58989	0.0537621	-1.53613	0.336692		No change			Leucine-rich repeat transmembrane neuronal protein 4	Protein-protein interactions at synapses				1.58989	0.0537621	-1.53613	0.336692		No change		LRRTM4	Leucine-rich repeat transmembrane neuronal protein 4
PDLIM5		1.37242	0.101291	-1.27113	-1.00023	TRUE	No change	FALSE		PDZ and LIM domain protein 5	Protein-protein interactions at synapses				1.37242	0.101291	-1.27113	-1.00023	TRUE	No change		PDLIM5	PDZ and LIM domain protein 5
PPFIA1		0.947976	1.89157	0.943592	-0.555119		No change			Liprin-alpha-1	Protein-protein interactions at synapses				0.947976	1.89157	0.943592	-0.555119		No change		PPFIA1	Liprin-alpha-1
PPFIA2		1.32088	2.36937	1.04849	-0.067153	FALSE	No change	FALSE		Liprin-alpha-2	Protein-protein interactions at synapses				1.32088	2.36937	1.04849	-0.067153	FALSE	No change		PPFIA2	Liprin-alpha-2
PTPRD		1.16936	0.949555	-0.219802	0.245452	TRUE	No change	FALSE		Receptor-type tyrosine-protein phosphatase delta;Protein-tyrosine-phosphatase	Protein-protein interactions at synapses				1.16936	0.949555	-0.219802	0.245452	TRUE	No change		PTPRD	Receptor-type tyrosine-protein phosphatase delta;Protein-tyrosine-phosphatase
PTPRS		1.64702	-0.252412	-1.89943	-1.12539		No change			Receptor-type tyrosine-protein phosphatase S	Protein-protein interactions at synapses				1.64702	-0.252412	-1.89943	-1.12539		No change		PTPRS	Receptor-type tyrosine-protein phosphatase S
RTN3		1.03039	0.676368	-0.354026	-0.318747	TRUE	Decreased	TRUE		Reticulon-3	Protein-protein interactions at synapses				1.03039	0.676368	-0.354026	-0.318747	TRUE	Decreased		RTN3	Reticulon-3
SHANK1		1.77568	0.591451	-1.18423	0.428929	FALSE	No change	FALSE		SH3 and multiple ankyrin repeat domains protein 1	Protein-protein interactions at synapses				1.77568	0.591451	-1.18423	0.428929	FALSE	No change		SHANK1	SH3 and multiple ankyrin repeat domains protein 1
SLITRK4		1.85202	1.47648	-0.375541	-0.497775		NA			SLIT and NTRK-like protein 4	Protein-protein interactions at synapses				1.85202	1.47648	-0.375541	-0.497775		NA		SLITRK4	SLIT and NTRK-like protein 4
STX1A		2.95232	0.640811	-2.31151	-0.23266	TRUE	Decreased	TRUE		Syntaxin-1A	Protein-protein interactions at synapses				2.95232	0.640811	-2.31151	-0.23266	TRUE	Decreased		STX1A	Syntaxin-1A
SYT1		1.55758	0.794138	-0.763446	-0.505165	TRUE	Decreased	TRUE		Synaptotagmin-1	Protein-protein interactions at synapses				1.55758	0.794138	-0.763446	-0.505165	TRUE	Decreased		SYT1	Synaptotagmin-1
Synapses constitute highly specialized sites of asymmetric cell-cell adhesion and intercellular communication. Its formation involves the recruitment of presynaptic and postsynaptic molecules at newly formed contacts. Synapse assembly and maintenance invokes heterophilic presynaptic and postsynaptic transmembrane proteins that bind each other in the extracellular space and recruit additional prot…
