# Supplementary material for: Systems-Level Interactome Mapping Reveals Actionable Protein Network Dysregulation Across the Alzheimer's Disease Spectrum
Source: Research Square preprint supplement (doi:10.21203/rs.3.rs-5930673/v1), 2025-02-12
Supplement: Supplementary file 4 [file a03e9509e599bcd9dcd725de.xlsx]

## Sheet: ROS
projid	study	apoe_genotype	cogdx	cogdx_stroke	dxpark	cts_mmse30_lv	age_bl	age_death	educ	msex	race	spanish	braaksc	ceradsc	niareagansc	pmi	amyloid	hspath_typ	dlbdx	tangles	tdp_st4	arteriol_scler	caa_4gp	cvda_4gp2	ci_num2_gct	ci_num2_mct
10203224	ROS	33	1	2	2	30	72.3039	83.2526	12	1	1	2	0	2	3	9.25	1.76594	0	3	0.813556	0	1	0	2	0	0
10205244	ROS	33	1	2	2	28	80.8296	82.9651	16	1	1	2	3	1	2	15.6167	1.3525	0	0	0.531528	3	2	2	1	0	0
10261026	ROS	33	1	2	2	29	78.3025	80.9446	25	1	1	2	3	4	3	16.6667	0	0	0	2.78353	0	1	1	1	0	0
10290265	ROS	33	1	1	2	29	69.1663	86.4038	18	1	1	2	5	1	1	20.4833	2.87833	0	0	1.80197	0	1	2	1	0	0
10490993	ROS	33	1	2	2	27	76.564	86.5051	21	1	1	2	5	2	2		7.05708	0	0	10.4372	1	2	1	2	0	0
10536568	ROS	33	1	2	2	28	78.5106	84.9884	19	1	1	2	1	3	3	15.1667	0	0	0	0.217951	0	3	1	2	1	0
11216503	ROS	33	1	1	2	29	74.1766	80.1342	18	1	1	2	2	1	2	3	1.44083	0	0	4.62971	0	0	1	1	1	0
11258675	ROS	33	1	2	2	29	67.4168	87.2471	16	1	1	2	3	4	3	6.25		0	0		0	0	0	0	0	0
11342432	ROS	33	1	2	2	29	82.5216	90.1109	21	1	1	2	2	4	3	2.58333	0	0	0	0.457275	0	0	1	1	0	0
15196262	ROS	33	1	2	2	28	72.8104	81.1636	22	1	1	2	1	4	3	12.4333	0.191429	0	0	1.66572	0	0	1	2	0	0
49647935	ROS	33	1	2	2	25	81.5414	89.5578	18	1	1	2	4	1	2	25	1.18583	0	0	2.1093	0	0	1	0	0	1
66743772	ROS	33	1	2	2	27	82.9432	90.4887	18	1	1	2	2	3	3	27.3	3.07587	0	0	0.376108	1	1	1	1	0	1
20274410	ROS	33	1	2	2	28	70.0041	89.8316	16	0	1	2	3	2	2	5	5.20688	1	0		3	1	1	2	0	0
20616100	ROS	33	1	2	2	29	67.9671	90.0808	18	0	1	2	2	2	3	5.75	0.095	0	0	0.587681	0	0	1	0	0	0
20729046	ROS	33	1	2	2	27	65.9986	88.5914	20	0	1	2	3	4	3	9.33333	0	0	0	2.7824	1	0	0	1	0	0
20956867	ROS	33	1	2	2	30	67.7645	79.1157	18	0	1	2	3	4	3	18.2167	0	0	1	0.274828	0	1	1	1	0	0
20996621	ROS	33	1	2	2	29	79.5181	84.1615	17	0	1	2	4	3	3	3.5	1.19167	0	0	4.50486	0	3	0	1	0	1
20205705	ROS	33	1	2	2	29	71.6085	79.6304	19	0	1	2	3	2	2	29.5833	1.04646	0	0	0.305235	0	0	1	0	0	0
21001933	ROS	33	1	2	2	27	75.6742	80.8542	16	0	1	2	2	3	3	4.83333	0.474375	0	0	0.368669	0	1	0	1	0	0
21120287	ROS	33	1	2	2	28	84.7118	86.8145	19	0	1	2	3	2	2	3.83333	3.18357		0	1.76483		2	3	1	0	0
26337838	ROS	33	1	1	2	27	80.2382	84.6954	20	0	1	2	3	4	3	9.08333	0	1	0	1.58434	0	0	0	0	0	0
30751221	ROS	33	1	2	2	29	77.7577	82.4367	18	0	1	2	3	1	2	10.9833			0		0	0	2	0	1	0
40470544	ROS	33	1	2	2	27	86.7433	88.397	27	0	1	2	3	2	2	20.4167	0.385	0	0	3.75917	0	0	3	0	0	1
43596435	ROS	33	1	2	2	29	77.3087	88.7967	20	0	1	2	3	4	3	19.5	0.2875	0	0	7.51038	0	0	2	1	1	1
58542820	ROS	33	1	2	2	30	79.4908	85.3552	20	0	1	2	4	2	2	8	4.11219	0	0	1.07615	1	1	1	1	0	0
NCI	n= 25	n= 25 E3/3				28.28		85.3009		12M/13F	n=25 W					12.5743
						1.2083		3.68284								8.09843
10101291	ROS	23	2	2	2	22	81.4839	83.3977	15	1	1	2	3	4	3	7.58333	0	0	0	0.628199	0	3	0	1	0	1
10510090	ROS	33	2	2	2	23	79.1348	91.8795	25	1	1	2	3	4	3	5.01667	0	0	0	0.0859333	0	0	0	1	1	0
20522343	ROS	33	2	2	2	23	76.4928	97.4511	16	0	1	2	3	2	2	5.03333	3.68	0	0	2.44156	0	1	3	1	1	0
10986136	ROS	34	2	2	2	29	69.8563	79.5428	18	1	1	2	4	4	3	15.0833	0	0	0	0.02573	1	0	0	2	0	0
11119101	ROS	33	2	1	2	22	65.1745	86.8693	12	1	1	2	4	1	2	20.8333	0.5575	0	0	2.51367	1	1	2	1	0	1
11409232	ROS	33	2	2	2	30	76.8761	80.0986	22	1	1	2	3	4	3	1.33333	0	0	0	1.10977	0	2	1	1	0	0
11455792	ROS	33	2	2	2	28	74.4367	85.1307	21	1	1	2	2	4	3	5	0	0	3	2.85732	0	0	0	0	0	0
11460357	ROS	33	2	2	1	27	85.4867	91.1595	17	1	1	2	4	1	2	1.5	4.53333	1	0	1.66852	1	3	1	1	1	0
11605894	ROS	33	2	2	2	25	71.0746	93.6893	16	1	1	2	5	1	1	14		0	0	3.59104	0	1	1	1	1	1
15193075	ROS	33	2	2	2	25	72.271	96.46	20	1	1	2	4	4	3	10.2167	0	0	0	17.3607	1	0	0	1	1	1
20153858	ROS	33	2	2	2	21	73.963	88.4764	20	0	1	2	3	1	2	22.5833	3.00031	0	0	1.56793	3	1	2	1	1	0
21232244	ROS	33	2	2	2	25	87.5264	97.514	16	0	1	2	4	2	2	9.91667	3.18969	0	0	7.52768	1	2	1	2	0	0
20264936	ROS	33	2	1	2	29	83.7344	88.6571	20	0	1	2	3	2	2	3.58333	3.97833	0	0	5.52143	0	3	0	1	1	0
15493842	ROS	23	2	2	2	27	83.0554	85.2676	18	0	1	2	1	4	3	10.8667	0.15125	0	0	0.704287	2	0	0	1	0	0
20569910	ROS	33	2	2	2	30	71.6632	83.7454	16	0	1	2	2	4	3	6.75	0	0	0	0.0234667	0	1	1	2	0	0
20938117	ROS	34	2	2	2	23	73.3717	93.1444	17	0	1	2	2	2	3	4.08333	2.48375	1	0	6.29844	3	0	3	1	0	0
20976799	ROS	33	2	2	2	19	74.924	93.8672	18	0	1	2	2	4	3	9.25	0.17625	1	0	0.656986	2	1	0	1	0	1
20977678	ROS	23	2	1	2	1	81.9959	92.8652	16	0	1	2	3	4	3	3.91667	0.11625	0	2	3.64893	0	2	1	2	1	0
21002074	ROS	33	2	2	2	20	73.0376	91.1348	18	0	1	2	3	2	2	9.53333	0.906875	0	0	10.0877	0	0	0	1	0	0
20767628	ROS	23	2	2	2	30	74.9322	86.8364	16	0	1	2	1	4	3	17	0	0	0	0.0781	0	0	0	1	1	0
21405627	ROS	33	2	2	2	28	88.6927	94.0041	12	0	1	2	3	4	3	1.83333	0	0	2	8.08598		2	0	1	0	0
21409243	ROS	34	2	2	2	26	75.9535	91.0938	18	0	1	2	5	1	1	14.5	5.07406	0	0	12.9346	3	1	1	1	0	0
48319614	ROS	33	2	2	2	22	76.1862	88.6489	18	0	1	2	4	1	2	4.83333	1.45312	0	0	2.78542	3	1	1	2	1	1
79590778	ROS	33	2	2	2	28	87.5537	88.2902	19	0	1	2	4	3	3	19.0833	0.86125	0	0	7.10805	1	0	0	1	0	0
97411796	ROS	33	2	2	2	30	80.2628	86.4942	18	0	1	2	2	2	3	8.25	4.49906	0	0	4.55413	0	0	0	0	0	0
MCI	n= 25	n= 4 E2/3				24.52		89.4287		9 M/16F	n=25 W					9.26333
		n= 18 E3/3				5.96601		4.96987								6.14146
		n= 3 E3/4
10101327	ROS	33	4	2	2	12	86.9185	89.7139	21	1	1	2	5	1	1	13.25	3.70083	0	0	21.5804	1	1	1	3	0	0
10216869	ROS	33	4	2	2	24	65.3854	82.0123	23	1	1	2	4	4	3	16.9167	0.225	0	3	4.12483	3	1	0	0	0	0
10222853	ROS	34	4	2	1	1	73.347	85.7769	20	1	1	2	5	1	1	4.5	6.38375	0	0	31.0343	3	2	2	2	1	1
10345561	ROS	33	4	1	2	13	86.026	92.2272	16	1	1	2	3	3	3	6.83333	2.18406	0	2	5.09459	0	1	2	2	1	0
10518782	ROS	33	4	2	2	27	79.5483	87.5674	22	1	1	2	5	1	1	9	0.738125	0	3	11.8289	0	1	1	1	0	0
11039282	ROS	33	4	2	2	16	72.8816	95.0198	18	1	1	2	3	2	2	4.41667	6.16281	0		7.08221	3	0	1	1	0	0
11120276	ROS	33	4	2	2	23	73.7166	95.5592	20	1	1	2	4	2	2	8.53333	3.20688	0	3	2.98767	3	0	1	2	1	1
11205014	ROS	34	4	2	2	5	70.2396	94.2231	8	1	1	2	5	2	2	6.08333	2.59417	0	3	13.8313	1	0	2	1	1	1
11302830	ROS	34	4	2	2	27	74.4093	85.8289	23	1	1	2	3	2	2	1.5	4.5065	0	0	6.64625	3	1	2	1	0	0
11322762	ROS	33	4	2	2	6	69.18	92.3176	20	1	1	2	5	1	1	15.75	3.26813	0	3	8.3718	0	0	1	1	0	1
31999149	ROS	33	4	2	2	0	79.0828	87.8001	18	0	1	2	6	1	1	2.66667			2	52.9078	3	1	1	1	0	1
15121461	ROS	34	4	2	2	16.1538	83.4415	93.4428	22	1	1	2	5	1	1	5.83333	1.95687	0	3	15.242		0	3	1	0	0
20204114	ROS	33	4	1	2	16	72.3039	90.5298	20	0	1	2	5	1	1	6.66667	18.0556	0	3	8.98178	3	2	1	1	0	0
20254876	ROS	33	4	2	2	7	83.6331	88.4271	18	0	1	2	5	1	1	8.08333	14.8731	0	0	19.066	3	1	3	2	1	0
20263921	ROS	33	4	2	2	15	83.0609	92.5147	20	0	1	2	5	1	1	17.5833	2.30625	0	0	21.3148	3	1	1	1	0	0
20265491	ROS	34	4	2	2	1	73.9138	90.4723	19	0	1	2	5	1	1	8.23333	8.44906	0	0	33.9007	1	2	3	1	0	1
20603727	ROS	34	4	1	2	4	68.7091	92.8131	19	0	1	2	5	1	1	7.68333			3		3	0	2	2	0	1
20611993	ROS	33	4	2	2	3	79.9617	89.6591	20	0	1	2	5	2	1	11.25	8.335	0	0	6.84941	3	1	2	2	0	0
20701008	ROS	34	4	2	2	0	68.8898	92.8871	16	0	1	2	5	1	1	7.33333	9.72312	0	0	15.7996	0	3	3	2	1	0
20850218	ROS	33	4	2	2	16	72.8186	91.5674	16	0	1	2	5	2	2	8			0	11.405	0	0	2	2	0	0
20877791	ROS	33	4	2	2	25	72.1916	90.4367	20	0	1	2	4	4	3	5.75	0.12625	0	2	8.50809	2	1	0	1	0	0
20925446	ROS	33	4	2	2	14	82.5024	87.551	14	0	1	2	4	2	2	3	2.04517	0	0	6.57293	3	0	1	2	1	1
20968361	ROS	34	4	2	2	12	72.4709	86.3518	16	0	1	2	5	1	1	31.6	6.47438	1	0	17.0176	3	2	2	2	0	0
20988167	ROS	33	4	2	2	21	70.1793	92.7392	18	0	1	2	3	4	3	16.0333	0.0925	0	0	2.7821	0	1	0	1	0	0
21401001	ROS	33	4	2	2	0	76.8104	87.9261	18	0	1	2	5	1	1	19.5833	8.09	0	0	28.5191	3	3	3	2	1	0
AD	n= 25	n= 17 E3/3				12.1662		90.2146		11 M/14 F	n=25 W					9.84333
		n= 8 E3/4				9.06588		3.31834								6.70665
Variable Details | RADC (rush.edu)
https://www.radc.rush.edu/docs/var/detail.htm?category=Pathology&subcategory=Beta-Amyloid&variable=amylsqrt_est_8reg
https://www.radc.rush.edu/docs/var/detail.htm?category=Pathology&subcategory=Neurofibrillary+tangles&variable=tangsqrt_est_8reg
https://www.radc.rush.edu/docs/var/standardDatasetVariables.htm

## Sheet: NKI-NYU
SDG CASE #	BRAIN BANK	DIAGNOSIS	SEX	AGE	PMI	BRAIN WT	ApoE	Race	Braak stage	Clinical diagnosis	Duration	MMSE
hSDG01	CNDR	AD	F	84	15	1080	2,4	W	Braak VI	definite Alzheimer's disease	12	6
hSDG02	CNDR	AD	F	56	14	976	3,3	W	Braak VI	definite Alzheimer's disease	5	3
hSDG04	CNDR	AD	M	85	14	1334	4,4	W	Braak V	probable Alzheimer's disease	1	15			mean	std
hSDG05	CNDR	AD	F	83	12	1325	3,4	W	Braak VI	definite Alzheimer's disease	5	8		age	79.0571	9.88743	AD
hSDG11	CNDR	AD	F	78	19	1041	4,4	W	Braak V	probable Alzheimer's disease	12	24			85.62	5.00972	MCI
hSDG148	CNDR	AD	F	76	11	1120	3,4	*	Braak VI	definite Alzheimer's disease	10	*			71.4211	17.6708	NCI
hSDG15	CNDR	AD	M	83	11	1077	3,4	W	Braak V	definite Alzheimer's disease	12	16			70.3889	13.4433	PD
hSDG17 / hSDG94	CNDR	AD	F	83	19	994	3,4	W	Braak V	definite Alzheimer's disease	12	24
hSDG185	CNDR	AD	F	83	4	1065	3,3	W	Braak VI	definite Alzheimer's disease	6	*		PMI	10.9571	5.40339	AD
hSDG187	CNDR	AD	F	88	10	1054	3,3	W	Braak V	definite Alzheimer's disease	9	15			12.87	10.2844	MCI
hSDG188	CNDR	AD	F	77	3	1010	2,4	W	Braak VI	definite Alzheimer's disease	9	0			13.1579	8.00009	NCI
hSDG189	CNDR	AD	F	84	24	1204	3,3	W	Braak VI	definite Alzheimer's disease	7	17			7.66667	3.48104	PD
hSDG191 / hSDG242	CNDR	AD	F	62	13.5	1242	3,3	W	Braak VI	definite Alzheimer's disease	14	11
hSDG192	CNDR	AD	F	83	10	1067	3,3	W	Braak V	definite Alzheimer's disease	5	*
hSDG193 / hSDG213	CNDR	AD	M	75	17	1076	3,3	W	Braak VI	definite Alzheimer's disease	9	*
hSDG194 / hSDG244	CNDR	AD	F	73	10	1063	4,4	W	Braak VI	definite Alzheimer's disease	9	0
hSDG195 / hSDG243	CNDR	AD	F	91	14	1066	2,3	W	Braak VI	definite Alzheimer's disease	20	*
hSDG201	CNDR	AD	F	86	3	975	3,4	B	Braak V	probable Alzheimer's disease	5	12
hSDG202	CNDR	AD	M	64	9	990	2,3	B	Braak VI	definite Alzheimer's disease	10	4
hSDG204	CNDR	AD	M	87	9	1383	4,4	W	Braak V	probable Alzheimer's disease	5	20
hSDG205	CNDR	AD	M	79	3.5	975	3,4	W	Braak VI	definite Alzheimer's disease	7	*
hSDG206	CNDR	AD	F	66	7	955	3,4	W	Braak VI	definite Alzheimer's disease	13	0
hSDG209	CNDR	AD	M	79	6	1233	3,3	W	Braak V	definite Alzheimer's disease	2	*
hSDG211	CNDR	AD	M	75	14.5	1317	3,4	W	Braak VI	definite Alzheimer's disease	8	6
hSDG214	CNDR	AD	F	80	11	952	4,4	W	Braak VI	definite Alzheimer's disease	10	2
hSDG26	CNDR	AD	M	86	17	1167	2,4	B	Braak VI	definite Alzheimer's disease	8	5
hSDG49	CNDR	AD	F	94	5	912	3,4	W	Braak VI	definite Alzheimer's disease	*	*
hSDG50	CNDR	AD	F	93	6	950	3,4	W	Braak VI	definite Alzheimer's disease	11	4
hSDG52 / hSDG98	CNDR	AD	F	85	4	957	3,3	W	Braak V	possible Alzheimer's disease	12	*
hSDG54	CNDR	AD	M	62	14	1560	3,4	W	Braak V	probable Alzheimer's disease	7	*
hSDG55	CNDR	AD	F	54	5	1180	3,4	W	Braak VI	definite Alzheimer's disease	*	*
hSDG57 / hSDG97	CNDR	AD	M	79	15	1380	3,3	W	Braak VI	definite Alzheimer's disease	8	17
hSDG96	CNDR	AD	F	87	3	815	3,4	W	Braak VI	definite Alzheimer's disease	11	0
hSDG58	CNDR	AD	F	83	16	1128	4,4	W	Braak VI	definite Alzheimer's disease	15	17
hSDG01	CNDR	AD	F	84	15	1080	2,4	W	Braak VI	definite Alzheimer's disease	12	6
hSDG07	CNDR	CTR	F	81	8	1025	3,3	B	Braak I	normal control	0	*
hSDG10	CNDR	CTR	M	70	10.5	1388	3,3	W	Braak I	normal control	0	*
hSDG13	CNDR	CTR	F	65	19	1207	3,3	W	Braak 0	normal control	0	*
hSDG16	CNDR	CTR	F	85	14	1198	3,3	W	Braak III	normal control	0	28
hSDG200	CNDR	CTR	M	29	12	*	3,3	W	Braak 0	normal control	0	*
hSDG203	CNDR	CTR	F	83	22	1102	3,3	B	Braak III	normal control	0	*
hSDG207	CNDR	CTR	F	92	5	1107	3,3	W	Braak III	normal control	0	*
hSDG219	CNDR	CTR	F	68	32	1278	3,3	B	Braak 0	normal control	0	*
hSDG221	CNDR	CTR	M	98	15	1340	3,3	W	Braak I	normal control	0	*
hSDG223	CNDR	CTR	M	90	6	1366	3,4	W	Braak II	normal control	0	30
hSDG27	CNDR	CTR	M	75	17	1390	3,3	W	Braak I	normal control	0	*
hSDG28 / hSDG100	CNDR	CTR	M	43	30.5	1545	3,3	W	Braak 0	suicide completer	0	*
hSDG53 / hSDG104	CNDR	CTR	M	47	12	1383	3,4	B	Braak I	normal control	0	*
hSDG99	CNDR	CTR	M	69	11	1625	3,3	W	Braak I	normal control	0	28
hSDG423	JHMIBRC	CTR	M	66	10	1380	*	*	*	normal control	0	*
hSDG424	JHMIBRC	CTR	M	79	10	1440	*	*	*	normal control	0	*
hSDG425	JHMIBRC	CTR	M	85	6	1120	*	*	*	normal control	0	*
hSDG426	JHMIBRC	CTR	F	58	6	1300	*	*	*	normal control	0	*
hSDG427	JHMIBRC	CTR	M	74	4	*	*	*	*	normal control	0	*
hSDG29	UMBEB	MCI	M	89	30	1465	2,3	W	Braak III	mild cognitive impairment	4	28
hSDG276	UMBEB	MCI	F	80	6.5	*	3,4	W	*	mild cognitive impairment	*	*
hSDG325	UMBEB	MCI	F	89	20.2	*	4,4	W	*	mild cognitive impairment	*	*
hSDG326	UMBEB	MCI	M	83	29.6	*	3,3	W+H	*	mild cognitive impairment	*	*
hSDG328	UMBEB	MCI	F	77	10.8	*	3,3	W	*	mild cognitive impairment	*	*
hSDG124	RROS	MCI	M	89.2	13.4	1570	3,4	W	Braak IV	mild cognitive impairment	*	24
hSDG126	RROS	MCI	F	88.7	3.6	1110	3,3	W	Braak III	mild cognitive impairment	*	29
hSDG160	RROS	MCI	F	91.5	5.8	1077	3,3	W	Braak V	mild cognitive impairment	*	29
hSDG161	RROS	MCI	M	88.3	4	1220	3,3	W	Braak I	mild cognitive impairment	*	25
hSDG422	RROS	MCI	F	80.5	4.8	990	3,3	W	Braak IV	mild cognitive impairment	*	26
hSDG141	CNDR	PD	F	64	7	1147	3,3	W	Braak I	idiopathic Parkinson's disease	16	*
hSDG142	CNDR	PD	M	79	5.5	1340	3,3	W	Braak I	idiopathic Parkinson's disease	26	*
hSDG144	CNDR	PD	M	67	7	1299	3,3	W	Braak II	idiopathic Parkinson's disease	20	*
hSDG145	CNDR	PD	M	86	12.5	1280	3,3	W	Braak I	idiopathic Parkinson's disease	23	30
hSDG146	CNDR	PD	M	73	7	1340	3,4	W	Braak I	idiopathic Parkinson's disease	16	*
hSDG149	CNDR	PD	M	75	6	1360	3,4	W	Braak 0	idiopathic Parkinson's disease	22	*
hSDG150	CNDR	PD	F	72	3	1234	3,4	W	Braak I	idiopathic Parkinson's disease	12	*
hSDG151	CNDR	PD	F	81	8	1212	2,3	W	Braak I	idiopathic Parkinson's disease	12	29
hSDG152	CNDR	PD	F	81	7	1066	3,3	W	Braak I	idiopathic Parkinson's disease	12	26
hSDG153	CNDR	PD	M	24	15	1420	3,3	W	Braak 0	idiopathic Parkinson's disease	6	*
hSDG154	CNDR	PD	M	68	14	1480	3,3	W	Braak I	idiopathic Parkinson's disease	26	28
hSDG155	CNDR	PD	M	67	12	1380	3,4	W	Braak 0	idiopathic Parkinson's disease	10	30
hSDG196	CNDR	PD	M	79	5	1220	3,3	W	Braak I	idiopathic Parkinson's disease w dementia	10	19
hSDG197	CNDR	PD	F	72	6	1177	3,3	W	Braak I	idiopathic Parkinson's disease	27	*
hSDG198	CNDR	PD	F	59	6.5	1245	3,3	W	Braak I	idiopathic Parkinson's disease	18	19
hSDG208	CNDR	PD	F	77	7	1180	3,3	W	Braak I	idiopathic Parkinson's disease w dementia	12	*
hSDG218	CNDR	PD/DLB	M	75	2.5	1379	2,3	W	Braak III	Parkinson's disease/diffuse Lewy body disease	*	*
hSDG222	CNDR	PD	F	68	7	1230	3,3	W	Braak I	idiopathic Parkinson's disease	28	*

## Sheet: Outlier
	SDG CASE #	DIAGNOSIS		MMSE	SUM HSP90/HOP			10 MCI SDG (2 on the bad gel)			SDG CASE #	DIAGNOSIS		MMSE	SUM HSP90/HOP			28 AD SDG	(3 on the bad gel)		SDG CASE #	DIAGNOSIS		MMSE	SUM HSP90/HOP
	hSDG13	CTR	F	*	neg/L		M	MCI 29	1.758		hSDG29	MCI	M	28	L		F	AD 5	5.7		hSDG05	AD	F	8	H
	hSDG16	CTR	F	28	neg/L		M	MCI 124	2.5315		hSDG124	MCI	M	24	L		F	AD 11	2.63162		hSDG11	AD	F	24	M
	hSDG207	CTR	F	*	neg/L		M	MCI 161	1.70312		hSDG161	MCI	M	25	L		F	AD 17	5.24786		hSDG17 / hSDG94	AD	F	24	H
	hSDG219	CTR	F	*	neg/L		M	MCI 326	1.1302		hSDG326	MCI	M	*	L		F	AD 49	4.02906		hSDG49	AD	F	*	H
	hSDG203	CTR	F	*	neg/L		F	MCI 276	0.829375		hSDG276	MCI	F	*	L		F	AD 50	3.77105		hSDG50	AD	F	4	H
outlier	hSDG426	CTR	F	*	H???		F	MCI 126	1.0635		hSDG126	MCI	F	29			F	AD 52	6.71316		hSDG52 / hSDG98	AD	F	*	H
	hSDG07	CTR	F	*	neg/L		F	MCI 160	1.54025		hSDG160	MCI	F	29			F	AD 55	4.29459		hSDG55	AD	F	*	H
	hSDG427	CTR	M	*	neg/L		F	MCI 328	2.34875		hSDG328	MCI	F	*	L		F	AD 206	3.3751		hSDG206	AD	F	0	H
	hSDG53 / hSDG104	CTR	M	*	neg/L		F	MCI 422	1.93125		hSDG422	MCI	F	26	L		F	AD 148	2.39592		hSDG148	AD	F	*	L
	hSDG99	CTR	M	28	neg/L		F	MCI 325	0.989796		hSDG325	MCI	F	*	L		F	AD 2	6.74935		hSDG02	AD	F	3	H
	hSDG27	CTR	M	*	neg/L												F	AD 243	0.8125		hSDG195 / hSDG243	AD	F	*	L
	hSDG28 / hSDG100	CTR	M	*	neg/L			20 MCI RUSH 8M 12F									F	AD 244	5.5475		hSDG194 / hSDG244	AD	F	0	H
	hSDG423	CTR	M	*	neg/L		M	MCI 1	2.1325			M	MCI 1	29	L		F	AD 96	2.67297		hSDG96	AD	F	0	M/H
	hSDG424	CTR	M	*	neg/L		M	MCI 9	5.63426			M	MCI 9	28	H		F	AD 187	1.992		hSDG187	AD	F	15	L
	hSDG200	CTR	M	*	neg/L		M	MCI 15	3.45083			M	MCI 15	27	H		F	AD 188	3.5325		hSDG188	AD	F	0	H
	hSDG221	CTR	M	*	neg/L		M	MCI 5	2.23929			M	MCI 5	27	L		F	AD 189	3.855		hSDG189	AD	F	17	H
	hSDG223	CTR	M	30	neg/L		M	MCI 6	3.03839			M	MCI 6	23	H		F	AD 1	5.18252		hSDG01	AD	F	6	H
	hSDG425	CTR	M	*	neg/L		M	MCI 17	1.46154			M	MCI 17	25	L		M	AD 204	2.68875		hSDG204	AD	M	20	M/H
	hSDG10	CTR	M	*	neg/L		M	MCI 18	0.863846			M	MCI 18	22	L		M	AD 205	1.68813		hSDG205	AD	M	*	L
							M	MCI 20	3.747			M	MCI 20	25	H		M	AD 209	3.39878		hSDG209	AD	M	*	H
							F	MCI 12	1.95917			F	MCI 12	26	L		M	AD 211	1.38408		hSDG211	AD	M	6	L
		Normal 8	F	27			F	MCI 10	5.08667			F	MCI 10	19	H		M	AD 54	5.87895		hSDG54	AD	M	*	H
		Normal 9	F	30			F	MCI 11	2.56583			F	MCI 11	23	L/M		M	AD 57	1.55135		hSDG57 / hSDG97	AD	M	17	L
		Normal 3	F	30			F	MCI 16	4.72923			F	MCI 16	20	H		M	AD 4	4.84935		hSDG04	AD	M	15	H
		Normal 4	F	29			F	MCI 13	4.85083			F	MCI 13	23	H		M	AD 213	3.31		hSDG193 / hSDG213	AD	M	*	H
		Normal 10	F	29			F	MCI 14	1.2525			F	MCI 14	21	L		M	AD 202	3.23062		hSDG202	AD	M	4	H
		Normal 11	F	29			F	MCI 19	0.32			F	MCI 19	22	L		M	AD 15	3.64188		hSDG15	AD	M	16	H
		Normal 16	F	29			F	MCI 2	2.09625			F	MCI 2	30	L		M	AD 26	5.01624		hSDG26	AD	M	5	H
		Normal 14	F	27			F	MCI 3	0.67875			F	MCI 3	25	L
		Normal 15	F	27			F	MCI 4	2.94618			F	MCI 4	1	H
		Normal 7	F	28			F	MCI 7	3.53771			F	MCI 7	28	H			20 AD RUSH
		Normal 6	M	29			F	MCI 8	3.41181			F	MCI 8	30	H		F	AD 1	4.2025			F	AD 1	3	H		4.2025	F	AD 1	H
		Normal 1	M	29													F	AD 4	2.76696			F	AD 4	7	L/M		3.75375	M	AD 2	H
		Normal 2	M	27		2.1325	M	MCI 1	L								F	AD 5	4.36071			F	AD 5	15	H		3.185	M	AD 3	H
		Normal 12	M	27		2.09625	F	MCI 2	L								F	AD 6	7.35357			F	AD 6	0	H		2.76696	F	AD 4	L
		Normal 13	M	25		0.67875	F	MCI 3	L								F	AD 7	4.45484			F	AD 7	16	H		4.36071	F	AD 5	M
		Normal 5	M	29		2.76786	F	MCI 4	H	3.1245	F	MCI 4	H				F	AD 10	5.20917			F	AD 10	1	H		7.35357	F	AD 6	M
						2.23929	M	MCI 5	L								F	AD 12	3.04167			F	AD 12	21	H		1.526	F	AD 4	L
						3.03839	M	MCI 6	H								F	AD 13	2.84083			F	AD 13	12	M/H		3.9295	F	AD 5	H
						3.46765	F	MCI 7	H	3.60778	F	MCI 7	H				F	AD 14	5.52417			F	AD 14	0	H		4.3875	F	AD 6	H
						3.31029	F	MCI 8	H	3.51333	F	MCI 8	H				F	AD 17	2.95385			F	AD 17	25	M/H		3.64191	F	AD 7	H
						4.75074	M	MCI 9	H	6.51778	M	MCI 9	H				F	AD 18	0.809231			F	AD 18	0	L		5.40809	M	AD 8	H
						5.08667	F	MCI 10	H								F	AD 19	4.091			F	AD 19	16	H		4.28162	M	AD 9	H
						2.56583	F	MCI 11	L/M								F	AD 20	1.551			F	AD 20	4	L		5.26778	F	AD 7	H
						1.95917	M	MCI 12	L								M	AD 8	5.40809			M	AD 8	24	H		9.61556	M	AD8	H
						4.85083	F	MCI 13	H								M	AD 9	6.88222			M	AD 9	23	H		6.88222	M	AD 9	H
						1.2525	F	MCI 14	L								M	AD 2	3.75375			M	AD 2	12	H		5.20917	F	AD 10	H
						3.45083	M	MCI 15	H								M	AD 3	3.185			M	AD 3	1	H		4.54417	M	AD 11	H
						4.72923	F	MCI 16	H								M	AD 11	4.54417			M	AD 11	16	H		3.04167	F	AD 12	H
						1.46154	M	MCI 17	L								M	AD 15	5.26167			M	AD 15	6	H		2.84083	F	AD 13	M/H
						0.863846	M	MCI 18	L								M	AD 16	4.69692			M	AD 16	5	H		5.52417	F	AD 14	H
						0.32	F	MCI 19	L																		5.26167	M	AD 15	H
						3.747	M	MCI 20	H								repeats										4.69692	M	AD 16	H
																	F	AD 7	4.67698	3.64191	5.71205						2.95385	F	AD 17	M/H
outlier calculation FOR NCI																	M	AD 8	7.9173	5.40809	10.4265						0.809231	F	AD 18	L
1. Calculate Q1: =PERCENTILE(range, 0.25)																	M	AD 9	5.87213	4.28162	7.46265						4.091	F	AD 19	H
2. Calculate Q3: =PERCENTILE(range, 0.75)																											1.551	F	AD 20	L
3. Calculate IQR: =Q3 - Q1																											4.502	M	AD 4	H
4. Set the outlier thresholds:
Upper threshold: =Q3 + 1.5 * IQR						Outliers identified using the interquartile range (IQR)
Lower threshold: =Q1 - 1.5 * IQR						Calculate the IQR to identify values that are much higher (or lower) than most of the data.
5. Flag values above or below these thresholds as outliers.						IQR = Q3 - Q1, where Q3 is the 75th percentile and Q1 is the 25th percentile.
						Any value greater than Q3 + 1.5 * IQR or less than Q1 - 1.5 * IQR can be considered an outlier.
0.813763	Q1
1.5001	Q3
0.686341	IQR
2.52962	upper
-0.21575	lower

## Sheet: Dichotomization
sex	10 MCI SDG (2 on the bad gel)	Epi HSC70		MMSE	SUM EpiHSP90/HOP			SDG/RUSH	Epi HSC70		SUM EpiHSP90/HOP	2.55 cut-off	2.5528	LOW 2	mean + 2 SD			SDG/RUSH	Epi HSC70		SUM EpiHSP90/HOP	2.55 cut-off
M	MCI 29	1.758		28	L		M	MCI 29	1.758	28	L	TRUE					M	MCI 9	5.63426	28	H	FALSE
M	MCI 124	2.5315		24	L		M	MCI 124	2.5315	24	L	TRUE					M	MCI 15	3.45083	27	H	FALSE		78 evaluable AD + MCI
M	MCI 161	1.70312		25	L		M	MCI 161	1.70312	25	L	TRUE					M	MCI 6	3.03839	23	H	FALSE		51 high	65.3846
M	MCI 326	1.1302		*	L		M	MCI 326	1.1302	*	L	TRUE					M	MCI 20	3.747	25	H	FALSE		27 low	34.6154
F	MCI 276	0.829375		*	L		F	MCI 276	0.829375	*	L	TRUE					F	MCI 10	5.08667	19	H	FALSE			%
F	MCI 126	1.0635		29	l		F	MCI 126	1.0635	29	l	TRUE					F	MCI 11	2.56583	23	L/M	FALSE
F	MCI 160	1.54025		29	l		F	MCI 160	1.54025	29	l	TRUE					F	MCI 16	4.72923	20	H	FALSE
F	MCI 328	2.34875		*	L		F	MCI 328	2.34875	*	L	TRUE					F	MCI 13	4.85083	23	H	FALSE
F	MCI 422	1.93125		26	L		F	MCI 422	1.93125	26	L	TRUE					F	MCI 4	2.94618	1	H	FALSE
F	MCI 325	0.989796		*	L		F	MCI 325	0.989796	*	L	TRUE					F	MCI 7	3.53771	28	H	FALSE
							M	MCI 1	2.1325	29	L	TRUE					F	MCI 8	3.41181	30	H	FALSE
	20 MCI RUSH 8M 12F						M	MCI 9	5.63426	28	H	FALSE					F	AD 5	5.7	8	H	FALSE
M	MCI 1	2.1325		29	L		M	MCI 15	3.45083	27	H	FALSE					F	AD 11	2.63162	24	M	FALSE
M	MCI 9	5.63426		28	H		M	MCI 5	2.23929	27	L	TRUE					F	AD 17	5.24786	24	H	FALSE
M	MCI 15	3.45083		27	H		M	MCI 6	3.03839	23	H	FALSE					F	AD 49	4.02906	*	H	FALSE
M	MCI 5	2.23929		27	L		M	MCI 17	1.46154	25	L	TRUE					F	AD 50	3.77105	4	H	FALSE
M	MCI 6	3.03839		23	H		M	MCI 18	0.863846	22	L	TRUE					F	AD 52	6.71316	*	H	FALSE
M	MCI 17	1.46154		25	L		M	MCI 20	3.747	25	H	FALSE					F	AD 55	4.29459	*	H	FALSE
M	MCI 18	0.863846		22	L		F	MCI 12	1.95917	26	L	TRUE					F	AD 206	3.3751	0	H	FALSE
M	MCI 20	3.747		25	H		F	MCI 10	5.08667	19	H	FALSE					F	AD 2	6.74935	3	H	FALSE
F	MCI 12	1.95917		26	L		F	MCI 11	2.56583	23	L/M	FALSE					F	AD 244	5.5475	0	H	FALSE
F	MCI 10	5.08667		19	H		F	MCI 16	4.72923	20	H	FALSE					F	AD 96	2.67297	0	M/H	FALSE
F	MCI 11	2.56583		23	L/M		F	MCI 13	4.85083	23	H	FALSE					F	AD 188	3.5325	0	H	FALSE
F	MCI 16	4.72923		20	H		F	MCI 14	1.2525	21	L	TRUE					F	AD 189	3.855	17	H	FALSE
F	MCI 13	4.85083		23	H		F	MCI 19	0.32	22	L	TRUE					F	AD 1	5.18252	6	H	FALSE
F	MCI 14	1.2525		21	L		F	MCI 2	2.09625	30	L	TRUE					M	AD 204	2.68875	20	M/H	FALSE
F	MCI 19	0.32		22	L		F	MCI 3	0.67875	25	L	TRUE					M	AD 209	3.39878	*	H	FALSE
F	MCI 2	2.09625		30	L		F	MCI 4	2.94618	1	H	FALSE					M	AD 54	5.87895	*	H	FALSE
F	MCI 3	0.67875		25	L		F	MCI 7	3.53771	28	H	FALSE					M	AD 4	4.84935	15	H	FALSE
F	MCI 4	2.94618		1	H		F	MCI 8	3.41181	30	H	FALSE					M	AD 213	3.31	*	H	FALSE
F	MCI 7	3.53771		28	H		F	AD 5	5.7	8	H	FALSE					M	AD 202	3.23062	4	H	FALSE
F	MCI 8	3.41181		30	H		F	AD 11	2.63162	24	M	FALSE					M	AD 15	3.64188	16	H	FALSE
							F	AD 17	5.24786	24	H	FALSE					M	AD 26	5.01624	5	H	FALSE
	28 AD SDG	(3 on the bad gel)		MMSE	SUM HSP90/HOP		F	AD 49	4.02906	*	H	FALSE					F	AD 1	4.2025	3	H	FALSE
F	AD 5	5.7		8	H		F	AD 50	3.77105	4	H	FALSE					F	AD 4	2.76696	7	L/M	FALSE
F	AD 11	2.63162		24	M		F	AD 52	6.71316	*	H	FALSE					F	AD 5	4.36071	15	H	FALSE
F	AD 17	5.24786		24	H		F	AD 55	4.29459	*	H	FALSE					F	AD 6	7.35357	0	H	FALSE
F	AD 49	4.02906		*	H		F	AD 206	3.3751	0	H	FALSE					F	AD 7	4.45484	16	H	FALSE
F	AD 50	3.77105		4	H		F	AD 148	2.39592	*	L	TRUE					F	AD 10	5.20917	1	H	FALSE
F	AD 52	6.71316		*	H		F	AD 2	6.74935	3	H	FALSE					F	AD 12	3.04167	21	H	FALSE
F	AD 55	4.29459		*	H		F	AD 243	0.8125	*	L	TRUE					F	AD 13	2.84083	12	M/H	FALSE
F	AD 206	3.3751		0	H		F	AD 244	5.5475	0	H	FALSE					F	AD 14	5.52417	0	H	FALSE
F	AD 148	2.39592		*	L		F	AD 96	2.67297	0	M/H	FALSE					F	AD 17	2.95385	25	M/H	FALSE
F	AD 2	6.74935		3	H		F	AD 187	1.992	15	L	TRUE					F	AD 19	4.091	16	H	FALSE
F	AD 243	0.8125		*	L		F	AD 188	3.5325	0	H	FALSE					M	AD 8	5.40809	24	H	FALSE
F	AD 244	5.5475		0	H		F	AD 189	3.855	17	H	FALSE					M	AD 9	6.88222	23	H	FALSE
F	AD 96	2.67297		0	M/H		F	AD 1	5.18252	6	H	FALSE					M	AD 2	3.75375	12	H	FALSE
F	AD 187	1.992		15	L		M	AD 204	2.68875	20	M/H	FALSE					M	AD 3	3.185	1	H	FALSE
F	AD 188	3.5325		0	H		M	AD 205	1.68813	*	L	TRUE					M	AD 11	4.54417	16	H	FALSE
F	AD 189	3.855		17	H		M	AD 209	3.39878	*	H	FALSE					M	AD 15	5.26167	6	H	FALSE
F	AD 1	5.18252		6	H		M	AD 211	1.38408	6	L	TRUE					M	AD 16	4.69692	5	H	FALSE
M	AD 204	2.68875		20	M/H		M	AD 54	5.87895	*	H	FALSE					M	MCI 29	1.758	28	L	TRUE
M	AD 205	1.68813		*	L		M	AD 57	1.55135	17	L	TRUE					M	MCI 124	2.5315	24	L	TRUE
M	AD 209	3.39878		*	H		M	AD 4	4.84935	15	H	FALSE					M	MCI 161	1.70312	25	L	TRUE
M	AD 211	1.38408		6	L		M	AD 213	3.31	*	H	FALSE					M	MCI 326	1.1302	*	L	TRUE
M	AD 54	5.87895		*	H		M	AD 202	3.23062	4	H	FALSE					F	MCI 276	0.829375	*	L	TRUE
M	AD 57	1.55135		17	L		M	AD 15	3.64188	16	H	FALSE					F	MCI 126	1.0635	29	l	TRUE
M	AD 4	4.84935		15	H		M	AD 26	5.01624	5	H	FALSE					F	MCI 160	1.54025	29	l	TRUE
M	AD 213	3.31		*	H		F	AD 1	4.2025	3	H	FALSE					F	MCI 328	2.34875	*	L	TRUE
M	AD 202	3.23062		4	H		F	AD 4	2.76696	7	L/M	FALSE					F	MCI 422	1.93125	26	L	TRUE
M	AD 15	3.64188		16	H		F	AD 5	4.36071	15	H	FALSE					F	MCI 325	0.989796	*	L	TRUE
M	AD 26	5.01624		5	H		F	AD 6	7.35357	0	H	FALSE					M	MCI 1	2.1325	29	L	TRUE
							F	AD 7	4.45484	16	H	FALSE					M	MCI 5	2.23929	27	L	TRUE
							F	AD 10	5.20917	1	H	FALSE					M	MCI 17	1.46154	25	L	TRUE
	20 AD RUSH						F	AD 12	3.04167	21	H	FALSE					M	MCI 18	0.863846	22	L	TRUE
F	AD 1	4.2025		3	H		F	AD 13	2.84083	12	M/H	FALSE					F	MCI 12	1.95917	26	L	TRUE
F	AD 4	2.76696		7	L/M		F	AD 14	5.52417	0	H	FALSE					F	MCI 14	1.2525	21	L	TRUE
F	AD 5	4.36071		15	H		F	AD 17	2.95385	25	M/H	FALSE					F	MCI 19	0.32	22	L	TRUE
F	AD 6	7.35357		0	H		F	AD 18	0.809231	0	L	TRUE					F	MCI 2	2.09625	30	L	TRUE
F	AD 7	4.45484		16	H		F	AD 19	4.091	16	H	FALSE					F	MCI 3	0.67875	25	L	TRUE
F	AD 10	5.20917		1	H		F	AD 20	1.551	4	L	TRUE					F	AD 148	2.39592	*	L	TRUE
F	AD 12	3.04167		21	H		M	AD 8	5.40809	24	H	FALSE					F	AD 243	0.8125	*	L	TRUE
F	AD 13	2.84083		12	M/H		M	AD 9	6.88222	23	H	FALSE					F	AD 187	1.992	15	L	TRUE
F	AD 14	5.52417		0	H		M	AD 2	3.75375	12	H	FALSE					M	AD 205	1.68813	*	L	TRUE
F	AD 17	2.95385		25	M/H		M	AD 3	3.185	1	H	FALSE					M	AD 211	1.38408	6	L	TRUE
F	AD 18	0.809231		0	L		M	AD 11	4.54417	16	H	FALSE					M	AD 57	1.55135	17	L	TRUE
F	AD 19	4.091		16	H		M	AD 15	5.26167	6	H	FALSE					F	AD 18	0.809231	0	L	TRUE
F	AD 20	1.551		4	L		M	AD 16	4.69692	5	H	FALSE					F	AD 20	1.551	4	L	TRUE
M	AD 8	5.40809		24	H
M	AD 9	6.88222		23	H
M	AD 2	3.75375		12	H
M	AD 3	3.185		1	H
M	AD 11	4.54417		16	H
M	AD 15	5.26167		6	H
M	AD 16	4.69692		5	H
