# Supplementary material for: Systems-Level Interactome Mapping Reveals Actionable Protein Network Dysregulation Across the Alzheimer's Disease Spectrum
Source: Research Square preprint supplement (doi:10.21203/rs.3.rs-5930673/v1), 2025-02-12
Supplement: Supplementary file 5 [file c60b138be17cc7b1c504c6da.xlsx]

## Sheet: ALL Intensity
				WT 7moF	WT 7moF	WT 7moF	WT 7moF	APP 7moF	APP 7moF	APP 7moF	APP 7moF	WT 15moF	WT 15moF	WT 15moF	WT 15moF	APP 15moF	APP 15moF	APP 15moF	APP 15moF
PG.Genes	PG.ProteinDescriptions	PG.ProteinNames		[1] Sample1_Inj1.PG.Quantity	[2] Sample1_Inj2.PG.Quantity	[3] Sample2_Inj1.PG.Quantity	[4] Sample2_Inj2.PG.Quantity	[5] Sample3_Inj1.PG.Quantity	[6] Sample3_Inj2.PG.Quantity	[7] Sample4_Inj1.PG.Quantity	[8] Sample4_Inj2.PG.Quantity	[9] Sample5_Inj1.PG.Quantity	[10] Sample5_Inj2.PG.Quantity	[11] Sample6_Inj1.PG.Quantity	[12] Sample6_Inj2.PG.Quantity	[13] Sample7_Inj1.PG.Quantity	[14] Sample7_Inj2.PG.Quantity	[15] Sample8_Inj1.PG.Quantity	[16] Sample8_Inj2.PG.Quantity
ND5;ND5;ND5;ND5;ND5;ND5;ND5;ND5;ND5;ND5;ND5;ND5;ND5;ND5;ND5;ND5;ND5;ND5;ND5;ND5;ND5;ND5;ND5;ND5;ND5;ND5;Nd5;Nd5;ND5;ND5;Mtnd5;;mt-Nd6;;ND5;ND5;ND5;mt-Nd5	NADH-ubiquinone oxidoreductase chain 5;NADH-ubiquinone oxidoreductase chain 5;NADH-ubiquinone oxidoreductase chain 5;NADH-ubiquinone oxidoreductase chain 5;NADH-ubiquinone oxidoreductase chain 5;NADH-ubiquinone oxidoreductase chain 5;NADH-ubiquinone oxidoreductase chain 5;NADH-ubiquinone oxidoreductase chain 5;NADH-ubiquinone oxidoreductase chain 5;NADH-ubiquinone oxidoreductase chain 5;NADH-ubiq…	A0A023J5X2_MOUSE;A0A023J5Y5_MOUSE;A0A023J5Z8_MOUSE;A0A023J611_MUSMC;A0A023J627_MOUSE;A0A023J672_MUSMC;A0A023J679_MOUSE;A0A023J6A9_MOUSE;A0A023J6C1_MUSMC;A0A023J6F2_MOUSE;A0A023J6G4_MOUSE;A0A023J6G8_MUSMC;A0A023J6I6_MOUSE;A0A023J6J5_MUSMC;A0A023J6L2_MUSMC;A0A067XKN8_MOUSE;A0A067XKV1_MOUSE;A0A067XKW0_MOUSE;A0A067XL99_MOUSE;A0A075DCB1_MOUSE;A0A0F6PYU6_MOUSE;A0A141CM51_MOUSE;A0A6M8U123_MOUSE;A3E4B7_M…		NaN	NaN	8.27049	NaN	NaN	NaN	NaN	NaN	NaN	NaN	NaN	NaN	NaN	NaN	25.556	20.2588
ND1;ND1;ND1;ND1;ND1;ND1;ND1;ND1;ND1;ND1;ND1;ND1;ND1;mt-ND1;ND1;Nd1;ND1;Mtnd1;mt-Nd1;mt-Nd1;ND1;ND1	NADH-ubiquinone oxidoreductase chain 1;NADH-ubiquinone oxidoreductase chain 1;NADH-ubiquinone oxidoreductase chain 1;NADH-ubiquinone oxidoreductase chain 1;NADH-ubiquinone oxidoreductase chain 1;NADH-ubiquinone oxidoreductase chain 1;NADH-ubiquinone oxidoreductase chain 1;NADH-ubiquinone oxidoreductase chain 1;NADH-ubiquinone oxidoreductase chain 1;NADH-ubiquinone oxidoreductase chain 1;NADH-ubiq…	A0A023J5Z6_MOUSE;A0A023J624_MOUSE;A0A023J675_MOUSE;A0A023J6A1_MOUSE;A0A023J6B5_MOUSE;A0A023J6F7_MOUSE;A0A023J6L7_MUSMC;A0A067XKM5_MOUSE;A0A067XKW4_MOUSE;A0A067XL97_MOUSE;A0A075DCA9_MOUSE;A0A0F6PXJ9_MOUSE;A0A141CM15_MOUSE;A0A7U3PY34_MOUSE;A3E4A7_MOUSE;B9V1J9_MOUSE;G3EB90_MOUSE;NU1M_MOUSE;Q3TNL9_MOUSE;Q4JFN6_MOUSE;Q5GA84_MUSMM;Q7JD06_MOUSE		124.552	126.045	52.4891	62.7847	NaN	NaN	NaN	55.1647	42.3925	NaN	NaN	NaN	93.252	121.333	55.4458	54.5359
ND3;ND3;ND3;ND3;ND3;ND3;ND3;ND3;ND3;ND3;mt-Nd3;ND3;mt-Nd3	NADH-ubiquinone oxidoreductase chain 3	A0A023J682_MOUSE;A0A023J686_MOUSE;A0A067XKP9_MOUSE;A0A067XLA1_MOUSE;A0A075DCW1_MOUSE;A0A0F6PZ20_MOUSE;A0A141CM22_MOUSE;A3E4B4_MOUSE;A3R459_MUSMC;A3R485_MOUSE;NU3M_MOUSE;Q5GA77_MUSMM;Q7GIP5_MOUSE		NaN	62.2405	21.6332	NaN	NaN	NaN	NaN	20.7157	NaN	NaN	NaN	NaN	33.6843	85.1855	65.902	43.3333
COX2;COX2;COXII;COX2;COXII;COXII;COXII;COXII;Mtco2;COX2;mt-Co2;COX2	Cytochrome c oxidase subunit 2	A0A023J6F3_MOUSE;A0A075DC90_MOUSE;A0A0F6PXF3_MOUSE;A3E4B0_MOUSE;A3R455_MUSMC;A3R481_MOUSE;K7XK22_MOUSE;K7XKA7_MOUSE;COX2_MOUSE;Q5GA81_MUSMM;Q7JCZ1_MOUSE;Q7JD03_MOUSE		896.077	730.272	453.703	492.281	280.274	407.273	232.993	277.869	318.252	366.989	192.078	221.629	560.4	598.62	1191.48	1199.78
Magohb;Magoh;Magohb	Mago homolog B, exon junction complex core component;Protein mago nashi homolog;Protein mago nashi homolog 2	A0A023T778_MOUSE;MGN_MOUSE;MGN2_MOUSE		146.682	143.596	101.139	104.945	192.376	161.059	111.423	130.643	105.566	104.519	96.9136	110.656	141.158	143.512	108.408	115.538
Dmd	Dystrophin Dp71ab	A0A023ZTV5_MOUSE		76.9064	64.8407	73.2411	71.7629	66.0113	91.7463	71.9309	62.3487	77.3649	99.0691	59.3001	63.6562	89.7673	94.7151	112.053	118.876
Pten	Mitochondrial PTENalpha;PTENbeta;Phosphatidylinositol 3,4,5-trisphosphate 3-phosphatase and dual-specificity protein phosphatase PTEN;Phosphatidylinositol 3,4,5-trisphosphate 3-phosphatase and dual-specificity protein phosphatase PTEN (Fragment);Phosphatidylinositol 3,4,5-trisphosphate 3-phosphatase and dual-specificity protein phosphatase PTEN (Fragment);Phosphatidylinositol 3,4,5-trisphosphate …	A0A024QYR9_MOUSE;A0A1V0DNR6_MOUSE;A0A6G6A824_MOUSE;A0A6G7SEK5_MOUSE;A0A6G7SF19_MOUSE;PTEN_MOUSE		83.757	87.0918	131.979	130.32	118.549	77.2493	122.212	113.972	165.05	166.368	120.378	163.302	101.524	128.325	62.3118	NaN
Cask	Calcium/calmodulin-dependent serine protein kinase (MAGUK family) (Fragment);Isoform 3 of Peripheral plasma membrane protein CASK	A0A067XG53_MOUSE;CSKP_MOUSE		120.885	63.2119	69.6032	119.792	84.2871	35.1774	71.245	74.7842	134.036	176.308	131.837	120.3	93.7886	101.601	124.811	116.085
Kank3	Putative KN motif and ankyrin repeat domains 3 isoform 1;KN motif and ankyrin repeat domains 3;KN motif and ankyrin repeat domain-containing protein 3	A0A068BD58_MOUSE;A0A068BIR7_MOUSE;KANK3_MOUSE		174.051	192.5	147.069	159.075	147.237	128.801	110.475	135.001	114.481	121.049	114.163	104.04	149.792	152.74	140.545	146.868
Rxrb	Putative retinoid X receptor beta isoform 2;Putative retinoid X receptor beta isoform 4;Putative retinoid X receptor beta isoform 3;Retinoid X receptor beta;Putative retinoid X receptor beta isoform 1;Putative retinoid X receptor beta isoform 5;Retinoic acid receptor RXR-beta;Isoform Short of Retinoic acid receptor RXR-beta;Retinoid X receptor beta;Retinoic acid receptor RXR	A0A068BD65_MOUSE;A0A068BES4_MOUSE;A0A068BFV6_MOUSE;A0A068BGT5_MOUSE;A0A068BGV8_MOUSE;A0A068BIV0_MOUSE;RXRB_MOUSE;RXRB_MOUSE;Q3TWJ1_MOUSE;Q8VCR0_MOUSE		55.9296	60.2744	51.6201	53.7593	50.6748	45.3892	55.0609	58.0011	51.2874	47.2071	47.2263	53.4722	51.8335	52.7525	69.4133	48.3019
Daxx	Death domain-associated protein 6;Death domain-associated protein 6;Death domain-associated protein 6;Death domain-associated protein 6;Death domain-associated protein 6;Death domain-associated protein 6;Death domain-associated protein 6 (Fragment);Death domain-associated protein 6 (Fragment);Death domain-associated protein 6 (Fragment);Death domain-associated protein 6 (Fragment)	A0A068BEP5_MOUSE;A1A558_MOUSE;DAXX_MOUSE;Q3U0Z3_MOUSE;Q3UIV3_MOUSE;Q3UKR0_MOUSE;Q5XLB0_MOUSE;Q5XW53_MOUSE;Q5XW54_MOUSE;Q5XW59_MOUSE		60.1233	76.2387	36.0388	47.3021	44.4867	95.1142	51.3144	42.3253	52.7667	45.0149	48.8998	45.7335	76.695	47.2666	38.6351	35.1294
Rab11b	RAS oncogene family protein;Ras-related protein Rab-11B;Rab11B	A0A068BFR3_MOUSE;RB11B_MOUSE;Q78ZJ8_MOUSE		3198.09	3226.31	3516.06	3594.07	2932.46	3021.72	3055.87	3238.55	3411.68	3169.47	4148.06	4014.66	3231.16	3109.43	3109.18	3153.8
Ring1	RING-type E3 ubiquitin transferase;E3 ubiquitin-protein ligase RING1	A0A068BFS4_MOUSE;RING1_MOUSE		NaN	NaN	NaN	NaN	153.246	63.4324	NaN	NaN	NaN	NaN	NaN	NaN	NaN	NaN	NaN	NaN
Vps52	Vacuolar protein sorting-associated protein 52 homolog	A0A068BGT0_MOUSE;VPS52_MOUSE		1394.54	1350.6	1218.69	1246.56	1428.86	1436.81	1364.53	1388.08	1455.83	1418.81	1301.9	1324.17	1309.98	1381.24	1419.18	1334.14
Psmb8	Proteasome subunit beta;Proteasome subunit beta type-8	A0A068BIT8_MOUSE;PSB8_MOUSE		60.7755	52.8037	56.2396	83.1016	62.791	125.056	71.949	76.4072	85.82	71.4479	46.6605	54.3986	78.6197	93.6468	96.7793	127.524
Pml	Promyelocytic leukemia;Protein PML	A0A068EW80_MOUSE;PML_MOUSE		247.58	248.508	249.201	265.474	277.326	290.54	294.543	305.635	263.559	252.089	254.503	260.296	232.017	225.415	277.53	271.425
Igkv17-127;Igkv17-121;Igkv17-127;Igkv17-121	Immunoglobulin kappa variable 17-127;Immunoglobulin kappa variable 17-121;Immunoglobulin kappa variable 17-127 (Fragment);Immunoglobulin kappa variable 17-121 (Fragment)	A0A075B5J9_MOUSE;A0A075B5K3_MOUSE;A0A0G2JDN5_MOUSE;A0A0G2JFA8_MOUSE		NaN	NaN	NaN	NaN	NaN	NaN	NaN	NaN	164.487	138.196	156.2	151.232	146.703	136.69	NaN	NaN
Igkv9-124	Immunoglobulin kappa chain variable 9-124	A0A075B5K2_MOUSE		NaN	NaN	NaN	NaN	NaN	NaN	NaN	19.031	59.0318	64.1006	60.8506	33.1058	64.542	37.069	35.9731	75.6685
Igkv12-89	Immunoglobulin kappa chain variable 12-89;Immunoglobulin kappa chain variable 12-89 (Fragment)	A0A075B5L4_MOUSE;A0A0G2JGW8_MOUSE		NaN	NaN	NaN	NaN	NaN	NaN	NaN	NaN	308.676	403.504	324.525	423.014	NaN	NaN	NaN	NaN
Igkv4-63;	Immunoglobulin kappa variable 4-63;Anti-VIPase light chain variable region (Fragment)	A0A075B5M1_MOUSE;Q8K1F0_MOUSE		NaN	NaN	NaN	NaN	NaN	NaN	NaN	NaN	65.5763	83.7018	49.8932	44.8754	NaN	14.139	28.9491	NaN
Igkv5-39;	Immunoglobulin kappa variable 5-39;B2 12-1 anti-human butyrylcholinesterase (BChE) light chain variable region (Fragment)	A0A075B5M7_MOUSE;A0A0M4KPD8_MOUSE		NaN	41.7092	39.8411	50.2301	85.8753	91.7169	88.6612	88.7504	157.865	135.963	134.766	149.418	284.841	296.931	326.485	424.492
Igkv6-29;Igkv6-29;Igkv6-20	Immunoglobulin kappa chain variable 6-29;Immunoglobulin kappa chain variable 6-29 (Fragment);Immunoglobulin kappa variable 6-20 (Fragment)	A0A075B5N2_MOUSE;A0A0G2JEI6_MOUSE;A0A140T8P2_MOUSE		NaN	NaN	NaN	NaN	NaN	NaN	NaN	NaN	28.921	51.6267	26.1886	37.2327	22.1841	25.4609	NaN	24.8686
Igkv8-27	Immunoglobulin kappa chain variable 8-27	A0A075B5N4_MOUSE		NaN	NaN	NaN	NaN	NaN	NaN	NaN	NaN	NaN	NaN	NaN	NaN	40.7158	44.7946	79.8998	56.8534
Igkv3-2;;;	Immunoglobulin kappa variable 3-2 (Fragment);Ig kappa chain V-III region PC 2880/PC 1229;Ig kappa chain V-III region PC 7132;Immmunoglobulin light chain variable region (Fragment)	A0A075B5P0_MOUSE;KV3A1_MOUSE;KV3A2_MOUSE;U5JE80_MOUSE		NaN	NaN	NaN	NaN	NaN	NaN	NaN	NaN	22.0089	NaN	31.5583	46.2346	92.0024	140.36	56.4021	59.3825
Ighg2b;Ighg2b;HC;HC;Ighg2b	Immunoglobulin heavy constant gamma 2B (Fragment);Immunoglobulin heavy constant gamma 2B (Fragment);MAb 110 heavy chain;MAb 106 heavy chain;IgG2b	A0A075B5P3_MOUSE;A0A0A6YVP0_MOUSE;A0A0F7QZE4_MOUSE;A0A0F7R1P3_MOUSE;A0A4V6JA63_MOUSE		252.135	231.831	100.801	90.3973	158.133	164.592	189.957	175.548	820.242	809.518	808.646	822.652	427.986	458.28	485.478	508.391
Ighg1;Ighg1;HC;Ighg1;Igh	Immunoglobulin heavy constant gamma 1 (G1m marker) (Fragment);Immunoglobulin heavy constant gamma 1 (G1m marker) (Fragment);HC protein;IgG1;Igh protein	A0A075B5P4_MOUSE;A0A0A6YWR2_MOUSE;A0A0C6E3V3_MOUSE;A0A4U9FFL2_MOUSE;I6L985_MOUSE		112.556	160.645	127.845	84.5046	130.686	63.3288	NaN	NaN	188.533	144.393	225.584	229.194	139.815	162.038	177.208	186.657
Ighg3;Ighg3;Ighg3;;	Immunoglobulin heavy constant gamma 3 (Fragment);Immunoglobulin heavy constant gamma 3 (Fragment);IgG3;Ig gamma-3 chain C region;Isoform 2 of Ig gamma-3 chain C region	A0A075B5P5_MOUSE;A0A1Y7VJN6_MOUSE;A0A4U9FKB1_MOUSE;IGHG3_MOUSE;IGHG3_MOUSE		207.469	NaN	97.3769	101.978	168.825	194.827	159.883	153.702	222.008	209.633	250.506	247.231	165.499	226.448	186.282	166.165
Ighm	Immunoglobulin heavy constant mu (Fragment);Immunoglobulin heavy constant mu	A0A075B5P6_MOUSE;IGHM_MOUSE		145.749	227.59	49.9753	61.4318	120.91	96.2169	94.0636	102.121	1968.39	1744.37	2270.1	2040.97	2388.64	2583.86	3036.77	2933.29
Ighv6-3	Immunoglobulin heavy variable 6-3 (Fragment)	A0A075B5T2_MOUSE		NaN	NaN	NaN	NaN	NaN	NaN	NaN	NaN	117.51	156.737	124.562	116.715	353.594	298.962	312.949	392.221
Ighv1-26	Immunoglobulin heavy variable 1-26 (Fragment)	A0A075B5V0_MOUSE		NaN	NaN	NaN	NaN	119.297	54.3365	65.8267	58.1493	354.681	384.945	321.134	385.528	164.013	171.323	220.529	224.513
Ighv1-55;V165-D-J-C mu;;;;;;;;	Immunoglobulin heavy variable 1-55 (Fragment);V165-D-J-C mu protein (Fragment);IgM heavy chain VDJ region (Fragment);IgM heavy chain VDJ region (Fragment);IgM heavy chain VDJ region (Fragment);IgM heavy chain VDJ region (Fragment);IgM heavy chain VDJ region (Fragment);IgM heavy chain VDJ region (Fragment);IgM heavy chain VDJ region (Fragment);IgM heavy chain VDJ region (Fragment)	A0A075B5W6_MOUSE;Q924Q0_MOUSE;X5J4N7_MOUSE;X5J4R6_MOUSE;X5J4Z8_MOUSE;X5J512_MOUSE;X5J595_MOUSE;X5J5C2_MOUSE;X5J5K0_MOUSE;X5J5M2_MOUSE		NaN	NaN	NaN	NaN	NaN	NaN	NaN	NaN	427.676	416.626	317.336	263.44	15.7304	NaN	NaN	NaN
Ighv1-62-1;;	Immunoglobulin heavy variable 1-62-1;IgG heavy chain variable domain (Fragment);IgG heavy chain variable domain (Fragment)	A0A075B684_MOUSE;A0A1X9HIH8_MOUSE;A0A1X9HIL9_MOUSE		NaN	73.4448	23.0137	43.7927	52.279	NaN	NaN	NaN	159.843	151.709	235.585	141.236	98.8542	72.6117	146.579	79.1924
Igha;Igha;	Immunoglobulin heavy constant alpha (Fragment);Immunoglobulin heavy constant alpha (Fragment);Ig-like domain-containing protein	A0A075B6A3_MOUSE;A0A0A6YXW6_MOUSE;Q9DCD9_MOUSE		NaN	NaN	129.61	161.67	NaN	56.1097	NaN	NaN	166.763	146.8	181.596	172.939	125.923	148.489	166.24	177.838
Hsf1	Heat shock factor 1;Heat shock transcription factor 1 gammaalpha isoform;Heat shock transcription factor 1 beta isoform;Heat shock transcription factor 1 alpha isoform;Heat shock factor 1;Heat shock factor protein 1;Isoform 1 of Heat shock factor protein 1;Heat shock factor 1	A0A075F5C6_MOUSE;A0A075F6C2_MOUSE;A0A075F882_MOUSE;A0A075F891_MOUSE;A0A2R8W6L8_MOUSE;HSF1_MOUSE;HSF1_MOUSE;Q52L52_MOUSE		NaN	28.8884	35.4918	28.9308	NaN	40.8623	22.1332	29.2782	61.3613	58.0748	68.9215	53.6358	50.8404	52.5639	72.6308	50.7988
Slc12a5	KCC2a variant 1;Solute carrier family 12 member 5	A0A076FRG6_MOUSE;S12A5_MOUSE		2739.02	2722.43	2400.24	2458.25	2167.48	2307.15	2165.95	2205.74	1744.55	1697.44	1736.61	1751.44	2102.13	2219.66	1898.23	1874.42
Alg11	GDP-Man:Man(3)GlcNAc(2)-PP-Dol alpha-1,2-mannosyltransferase;GDP-Man:Man(3)GlcNAc(2)-PP-Dol alpha-1,2-mannosyltransferase	A0A077K846_MOUSE;ALG11_MOUSE		127.298	140.382	102.055	107.276	82.4123	100.878	86.3043	85.8645	118.792	120.79	105.225	110.258	111.044	97.3495	123.449	113.842
Cd200l1;Cd200l2;Cd200l1;Cd200l1;Cd200l1	ISEC1 protein, intestinal secretory cell protein 1;CD200 molecule like 2;CD200 molecule like 1;CD200 molecule like 1;Gene model 609, (NCBI)	A0A077K8V5_MOUSE;A0A077KA19_MOUSE;A0A338P6R0_MOUSE;E9Q573_MOUSE;Q7TPQ6_MOUSE		NaN	NaN	NaN	346.717	NaN	NaN	132.052	209.665	36.6769	360.599	73.5569	90.2145	93.9067	124.651	593.023	674.225
Lyz1	lysozyme;Lysozyme C-1	A0A077S9N1_MOUSE;LYZ1_MOUSE		255.346	215.767	96.1409	88.3659	253.809	147.785	122.278	96.8582	72.8212	58.7085	39.0429	71.0214	114.212	129.699	75.9467	91.4563
Cdv3	Carnitine deficiency-associated gene expressed in ventricle 3;Protein CDV3;Isoform 2 of Protein CDV3	A0A087WNP6_MOUSE;CDV3_MOUSE;CDV3_MOUSE		558.276	477.841	383.369	375.365	1049.26	948.66	670.816	703.78	258.499	218.497	620.742	466.777	794.046	810.467	1142.44	403.726
Ogfrl1	Opioid growth factor receptor-like 1 (Fragment)	A0A087WNQ8_MOUSE		136.422	172.001	100.092	136.102	84.7902	102.235	99.3617	146.912	116.528	112.429	105.751	121.185	238.089	133.332	39.268	42.5198
Ly6e	Lymphocyte antigen 6 complex, locus E (Fragment);Lymphocyte antigen 6 complex, locus E;Lymphocyte antigen 6 complex, locus E (Fragment);Lymphocyte antigen 6 complex, locus E (Fragment);Lymphocyte antigen 6E;Ly6e protein (Fragment);UPAR/Ly6 domain-containing protein	A0A087WNS9_MOUSE;A0A087WPY4_MOUSE;A0A087WQ65_MOUSE;A0A087WRZ2_MOUSE;LY6E_MOUSE;Q8JZT1_MOUSE;Q9CXN2_MOUSE		484.43	490.795	451.679	386.575	423.562	308.401	372.301	390.61	514.394	491.828	418.704	453.069	359.616	368.265	590.853	714.808
Eloc	Elongin-C;Elongin-C (Fragment);Elongin-C	A0A087WNT1_MOUSE;A0A087WQE6_MOUSE;ELOC_MOUSE		3305.88	3805.25	3652.41	3657.46	3223.52	3262.85	3454.58	3547.69	2644.27	2795.85	3383.1	3205.76	3276.1	3497.16	3372.12	3754.8
Selenoh	Selenoprotein H	A0A087WNU1_MOUSE;A0A087WPM0_MOUSE;SELH_MOUSE		57.4075	80.2345	56.7338	29.8135	50.9553	40.0005	60.7608	48.5539	42.3127	41.1755	47.7905	48.4396	50.2358	46.7643	40.1867	62.583
Agfg1	ArfGAP with FG repeats 1;ArfGAP with FG repeats 1 (Fragment);ArfGAP with FG repeats 1;Arf-GAP domain and FG repeat-containing protein 1;Isoform 1 of Arf-GAP domain and FG repeat-containing protein 1;Isoform 3 of Arf-GAP domain and FG repeat-containing protein 1	A0A087WNV1_MOUSE;A0A087WR52_MOUSE;A0A087WSR7_MOUSE;AGFG1_MOUSE;AGFG1_MOUSE;AGFG1_MOUSE		502.277	511.322	556.962	600.816	519.455	496.573	488.773	521.352	340.1	350.299	335.766	358.188	327.346	348.693	359.894	369.552
Ktn1	Kinectin 1	A0A087WNW3_MOUSE;A0A087WQ25_MOUSE;A0A087WQQ5_MOUSE;F8VQC7_MOUSE		111.28	102.627	81.2919	73.091	91.7064	80.5399	76.0009	67.7417	96.859	124.717	70.8521	86.6705	107.73	130.842	100.837	92.021
Rgs6	Regulator of G-protein signaling 6	A0A087WNZ9_MOUSE;A0A087WPW1_MOUSE;A0A087WSJ9_MOUSE;RGS6_MOUSE		1137.51	1060.88	1154.65	1110.85	1386.42	1531.51	1470.04	1486.28	1337.71	1394.21	1563.62	1564.64	1024.78	1051.93	1220.64	1306.57
BC034090	cDNA sequence BC034090	A0A087WP46_MOUSE		NaN	146.396	39.3319	38.5914	38.1984	53.4582	61.5967	58.6473	72.9716	37.6862	89.9787	NaN	87.1798	82.0089	39.0559	38.7386
Fam135a	Family with sequence similarity 135, member A	A0A087WP54_MOUSE		NaN	NaN	98.0158	46.1625	102.241	NaN	145.354	102.954	102.237	92.0767	115.356	116.766	104.85	82.3168	98.1538	199.35
Lsamp	Limbic system-associated membrane protein	A0A087WP80_MOUSE;Q3TYE5_MOUSE;LSAMP_MOUSE		636.825	606.862	617.025	636.246	448.946	471.449	525.96	477.384	651.939	627.141	701.139	712.289	745.184	713.39	576.698	580.543
Actr3	Actin-related protein 3 (Fragment)	A0A087WP86_MOUSE		194.264	151.739	224.903	249.328	114.138	107.391	165.518	132.3	76.5325	120.624	89.7565	104.501	152.739	152.279	442.797	355.724
Lrrfip1	Leucine rich repeat (in FLII) interacting protein 1;Lrrfip1 protein;Leucine rich repeat (in FLII) interacting protein 1;Isoform 2 of Leucine-rich repeat flightless-interacting protein 1	A0A087WPK3_MOUSE;A6H5U5_MOUSE;E9Q9T1_MOUSE;LRRF1_MOUSE		160.827	205.801	123.168	133.648	171.782	194.816	177.137	161.906	115.439	125.873	119.022	122.243	160.977	205.243	177.82	172.185
Pdlim2	PDZ and LIM domain 2;PDZ and LIM domain 2 (Fragment);PDZ and LIM domain protein 2	A0A087WPL1_MOUSE;F7C957_MOUSE;PDLI2_MOUSE		42.9214	30.1468	31.3282	39.7542	27.5859	34.8374	44.5844	34.3944	NaN	12.0989	25.0518	36.6009	44.7538	47.2599	111.868	87.1165
Abi2	Abl interactor 2;Abl interactor 2;Abi2 protein	A0A087WPP8_MOUSE;ABI2_MOUSE;Q6AXH6_MOUSE		7433.15	7637.01	7439.55	7395.23	6751.06	6843.88	7249.03	7276.8	7156.58	6924.66	7476.51	7320.32	7314.23	7401.26	7067.74	7027.47
Dst	Dystonin (Fragment)	A0A087WPR7_MOUSE		108.051	105.868	80.2443	94.9158	105.565	100.471	78.4732	98.5371	90.6125	94.9053	98.7863	91.6327	131.431	114.177	151.115	152.257
Nfasc	Neurofascin	A0A087WPX3_MOUSE		NaN	NaN	NaN	NaN	184.026	NaN	163.261	200.019	145.42	143.398	121.23	NaN	140.68	154.038	156.549	NaN
Clasp1	CLIP associating protein 1	A0A087WQ31_MOUSE		1134.82	1157.97	955.805	931.938	1029.33	1050.11	1020.83	978	917.925	935.911	791.206	792.566	880.003	931.698	905.377	856.418
Kcnma1	Calcium-activated potassium channel subunit alpha-1;Calcium-activated potassium channel subunit alpha-1;Calcium-activated potassium channel subunit alpha-1;Calcium-activated potassium channel subunit alpha-1 (Fragment);Calcium-activated potassium channel subunit alpha-1 (Fragment);Calcium-activated potassium channel subunit alpha-1 (Fragment);Calcium-activated potassium channel subunit alpha-1 (F…	A0A087WQ41_MOUSE;A0A087WQN5_MOUSE;A0A087WRS4_MOUSE;A0A286YCI9_MOUSE;A0A286YCP1_MOUSE;A0A286YCQ2_MOUSE;A0A286YCW3_MOUSE;A0A286YCZ9_MOUSE;A0A286YD35_MOUSE;A0A286YD59_MOUSE;A0A286YDC1_MOUSE;A0A286YDM6_MOUSE;A0A286YDR7_MOUSE;A0A286YDU9_MOUSE;A0A286YE30_MOUSE;C3VLD3_MOUSE;E3VRY4_MOUSE;E3VRY5_MOUSE;E3VRY6_MOUSE;E3VRY7_MOUSE;E3VRY8_MOUSE;E3VRY9_MOUSE;E3VRZ0_MOUSE;E3VRZ1_MOUSE;E3VRZ2_MOUSE;E3VRZ3_MOUSE;E…		68.6726	78.6191	48.2324	46.3632	55.62	52.2185	50.6501	47.4986	37.7026	51.6003	39.0407	41.1752	58.9002	57.2767	57.8264	64.1403
Hdac4	Histone deacetylase 4 (Fragment)	A0A087WQ92_MOUSE		364.953	416.699	440.136	338.61	517.234	454.329	490.924	459.781	452.363	469.568	427.427	383.445	333.309	385.925	424.034	403.054
Morf4l1	Mortality factor 4 like 1;Isoform 2 of Mortality factor 4-like protein 1;Chromo domain-containing protein;Chromo domain-containing protein (Fragment);MRG15 protein	A0A087WQB0_MOUSE;MO4L1_MOUSE;Q3UBK1_MOUSE;Q3UIS6_MOUSE;Q569V4_MOUSE		120.255	136.443	107.718	89.7244	92.5086	131.52	94.0076	121.166	93.5651	87.1246	130.905	88.7339	75.9184	93.5464	128.714	157.034
Traf3ip1	TRAF3 interacting protein 1;TRAF3-interacting protein 1	A0A087WQD8_MOUSE;MIPT3_MOUSE		29.2368	NaN	NaN	21.2058	38.4448	78.0841	20.2982	36.6379	15.6754	NaN	24.0513	36.3403	NaN	31.3611	NaN	NaN
Kif1a	Kinesin family member 1A	A0A087WQE8_MOUSE		9235.11	9185.29	9573.38	9657.25	10006.1	10075.6	9774.68	10188.3	10099.9	10280.1	10935	10855.6	9727.07	9716.87	9930	9914.89
Plppr2	Phospholipid phosphatase related 2;Isoform 2 of Phospholipid phosphatase-related protein type 2	A0A087WQF0_MOUSE;PLPR2_MOUSE		52.4446	74.076	26.3006	44.9808	42.3864	40.8341	34.6471	35.4757	58.4417	39.1406	34.2485	26.5743	45.0881	38.9184	66.0761	54.7395
Slc39a10	Solute carrier family 39 (zinc transporter), member 10 (Fragment);Solute carrier family 39 (zinc transporter), member 10 (Fragment);Zinc transporter ZIP10	A0A087WQF7_MOUSE;A0A087WRC8_MOUSE;S39AA_MOUSE		197.893	151.64	110.509	84.5166	94.0111	99.9366	93.0311	91.7178	126.726	145.292	87.9519	120.084	99.2463	101.703	77.5951	86.8701
Xrn1	5'-3' exoribonuclease 1	A0A087WQN7_MOUSE;F8VQ87_MOUSE		161.258	162.625	129.097	139.942	149.845	136.301	128.698	149.068	141.804	122.282	140.439	134.816	143.682	157.968	145.257	151.538
Tns1	Tensin 1	A0A087WQS0_MOUSE		236.909	264.827	176.711	183.209	233.28	215.126	206.94	182.732	191.527	203.387	182.767	168.449	193.514	213.196	231.869	228.21
Bzw1	Basic leucine zipper and W2 domains 1;eIF5-mimic protein 2	A0A087WQS2_MOUSE;5MP2_MOUSE		1196.32	1187.07	1020.57	1033.45	1360.03	1360.41	1251.06	1226.35	1321.14	1269.95	1396.08	1282.28	1272.15	1309.35	951.251	961.401
Casp8	Caspase 8;Caspase-8;Caspase-8;Casp8 protein	A0A087WQT6_MOUSE;CASP8_MOUSE;Q3U607_MOUSE;Q4FK85_MOUSE		120.801	136.256	117.823	103.727	116.293	108.081	128.335	120.669	113.014	124.16	98.6806	114.292	138.732	139.633	112.453	108.729
Ralgps2	Ral GEF with PH domain and SH3 binding motif 2;Ral GEF with PH domain and SH3 binding motif 2;Ras-specific guanine nucleotide-releasing factor RalGPS2;Isoform 4 of Ras-specific guanine nucleotide-releasing factor RalGPS2	A0A087WQU0_MOUSE;Q8C134_MOUSE;RGPS2_MOUSE;RGPS2_MOUSE		313.106	296.528	282.827	270.584	310.204	280.616	248.595	286.318	281.522	267.942	264.981	287.194	341.046	297.249	322.389	342.248
Mturn	Maturin	A0A087WQV4_MOUSE;MTURN_MOUSE		770.73	794.108	779.273	820.302	907.596	853.287	919.94	915.348	768.468	806.632	790.329	804.998	643.14	699.594	919.806	888.211
Dnah7c;Dnah7b;Dnah7a;Dnah7b	Dynein, axonemal, heavy chain 7C;Dynein, axonemal, heavy chain 7B;Dynein, axonemal, heavy chain 7A;Dynein, axonemal, heavy chain 7B	A0A087WR13_MOUSE;A0A571BD48_MOUSE;E9Q0T8_MOUSE;L7N1Y0_MOUSE		80.7111	176.093	72.0757	67.7947	165.822	125.259	104.969	126.904	48.6679	39.4451	61.5058	107.993	124.995	111.715	109.236	124.196
Edem3	alpha-1,2-Mannosidase;ER degradation-enhancing alpha-mannosidase-like protein 3	A0A087WR24_MOUSE;EDEM3_MOUSE		114.205	108.775	115.84	101.993	86.0913	86.2292	83.6236	84.3736	94.5807	102.026	82.5264	94.1673	84.3861	85.1959	113.462	125.978
Fn1	Fibronectin	A0A087WR50_MOUSE;A0A087WS56_MOUSE;Q3UGY5_MOUSE;Q3UH17_MOUSE;Q3UHL6_MOUSE		138.033	163.272	78.1396	84.3492	106.32	110.715	101.717	93.0761	180.869	189.952	192.243	195.676	171.088	155.533	167.121	145.886
Tuba4a	Tubulin alpha-4A chain (Fragment)	A0A087WRB4_MOUSE		378.836	514.459	627.077	513.067	721.244	538.864	446.051	559.259	738.28	600.647	487.228	643.537	574.81	562.441	601.418	556.202
Adhfe1	Hydroxyacid-oxoacid transhydrogenase, mitochondrial (Fragment);Hydroxyacid-oxoacid transhydrogenase, mitochondrial;Isoform 2 of Hydroxyacid-oxoacid transhydrogenase, mitochondrial	A0A087WRE7_MOUSE;HOT_MOUSE;HOT_MOUSE		75.6591	76.3398	70.2547	65.0451	68.2418	89.2992	55.5716	65.5664	81.7193	80.4997	86.5062	79.8739	89.7249	78.3377	90.1601	84.5965
Zfp951	Zinc finger protein 951;Zinc finger protein 951;Uncharacterized protein	A0A087WRH0_MOUSE;F8VPV1_MOUSE;Q3V1G7_MOUSE		17228.5	18267.6	17770.7	17521.4	17721.1	21185	18752.9	18478.5	20857	20590	19488.3	19605.9	NaN	15614.4	16903.5	16060.9
Creb1;Creb1;Creb1;Creb1;Creb1;CREB;Creb1	cAMP responsive element binding protein 1;Cyclic AMP-responsive element-binding protein 1;Isoform 2 of Cyclic AMP-responsive element-binding protein 1;Cyclic AMP-responsive element-binding protein 1;cAMP response element binding protein;C-AMP-responsive-element binding protein omega;M.musculus transcription factor/DNA binding protein	A0A087WRI6_MOUSE;CREB1_MOUSE;CREB1_MOUSE;Q543W0_MOUSE;Q547S9_MOUSE;Q61442_MOUSE;Q62347_MOUSE		NaN	NaN	40.2446	49.25	NaN	43.3009	61.6856	55.6052	55.4076	76.8693	37.6257	76.0504	45.3162	68.7267	57.4164	65.9587
Zfp1006	RIKEN cDNA 2610044O15 gene	A0A087WRJ1_MOUSE		87.6006	68.2456	54.1802	49.9599	85.4277	77.5311	54.1786	61.5172	55.2723	52.6756	55.5362	52.4335	63.679	72.7754	64.0982	52.824
Gm13889;Gm13889;Ag2	Predicted gene 13889;Predicted gene 13889;Uncharacterized protein C11orf96 homolog	A0A087WRN5_MOUSE;A0A087WSH6_MOUSE;CK096_MOUSE		170.261	167.056	148.43	163.206	85.4524	153.81	126.303	109.767	133.142	135.484	133.792	140.117	178.664	171.291	222.241	243.082
Ank3	Ankyrin 3, epithelial (Fragment)	A0A087WRP9_MOUSE		436.027	472.03	408.478	382.858	477.308	540.088	312.365	297.383	402.683	422.364	332.962	393.177	317.926	352.329	371.897	369.36
Abi2	Abl interactor 2	A0A087WRS3_MOUSE		64.5327	40.9301	20.4672	27.719	10.7293	11.9058	47.2469	18.0471	28.7023	28.3496	66.2483	87.4483	57.8477	73.0228	44.3515	40.2593
Fat1	FAT atypical cadherin 1;FAT atypical cadherin 1;FAT atypical cadherin 1;Fat 1 cadherin (Fragment)	A0A087WRT4_MOUSE;A0A1L1SQU7_MOUSE;F2Z4A3_MOUSE;Q9QXA3_MOUSE		404.465	403.765	327.936	344.997	412.91	414.725	368.973	330.976	318.26	378.502	359.745	323.896	359.118	390.525	356.798	370.611
Nucks1	Nuclear casein kinase and cyclin-dependent kinase substrate 1;Nuclear ubiquitous casein and cyclin-dependent kinase substrate 1	A0A087WRY3_MOUSE;NUCKS_MOUSE		315.114	269.377	229.082	190.651	267.621	283.984	198.133	271.12	412.566	431.64	293.458	296.574	342.555	338.056	358.118	355.679
Sh3bgrl2	SH3 domain-binding glutamic acid-rich-like protein;SH3 domain-binding glutamic acid-rich-like protein 2;SH3 domain-binding glutamic acid-rich-like protein	A0A087WS96_MOUSE;SH3L2_MOUSE;Q8C073_MOUSE		33.2093	28.8425	54.5084	49.2034	46.7226	64.4979	58.6433	35.3722	58.4449	43.4196	37.2803	44.3574	44.2327	48.1358	38.6058	36.7878
2410002F23Rik	RIKEN cDNA 2410002F23 gene;RIKEN cDNA 2410002F23 gene;2410002F23Rik protein	A0A087WSJ7_MOUSE;Q3TE80_MOUSE;Q9CWW9_MOUSE		50.0876	62.7836	60.0085	62.1686	71.0735	67.2123	57.9392	61.6472	68.0252	75.6166	62.3761	51.7082	58.7689	70.2671	75.6385	76.9389
Gm28778;Gm28778;Ormdl1;Ormdl2	N(6)-L-threonylcarbamoyladenine synthase;ORM1-like protein 1;ORM1-like protein 1;ORM1-like protein 2	A0A087WSK7_MOUSE;A0A9L6KDX5_MOUSE;ORML1_MOUSE;ORML2_MOUSE		NaN	NaN	17.9865	NaN	NaN	10.3195	NaN	NaN	NaN	NaN	19.8186	18.6911	10.2369	29.4314	38.9524	27.908
Ica1l	Islet cell autoantigen 1-like;Islet cell autoantigen 1-like protein	A0A087WSM1_MOUSE;ICA1L_MOUSE		910.249	817.926	974.514	909.358	866.672	878.987	885.122	924.108	948.092	822.934	948.69	956.122	969.788	928.102	837.418	836.829
Stat1	Signal transducer and activator of transcription	A0A087WSP5_MOUSE;Q3TW11_MOUSE;Q8C3V4_MOUSE;Q8C8M3_MOUSE;Q9D323_MOUSE		1166.14	1208.63	1158.19	1197.45	1245.78	1299.83	1265.25	1220.56	1122.98	1138.61	1242.3	1261.44	1420.04	1399.25	1420.25	1376.53
Srgap2	SLIT-ROBO Rho GTPase activating protein 2 (Fragment)	A0A087WSQ1_MOUSE		NaN	NaN	9.85478	18.6158	86.926	42.0998	42.8125	49.8741	NaN	39.4376	6.96029	34.9672	35.7735	55.5805	NaN	NaN
Relch	RAB11 binding and LisH domain, coiled-coil and HEAT repeat containing	A0A087WSS1_MOUSE		1975.21	1856.56	1943.9	1936.33	2228.82	2393.33	1929.23	2054.57	1834.68	1860.75	2175.4	2049.18	2002.27	2265.88	1503.96	1451.42
Nab1	Ngfi-A binding protein 1;Ngfi-A binding protein 1;NGFI-A-binding protein 1	A0A087WSU4_MOUSE;E9PZ64_MOUSE;NAB1_MOUSE		120.13	99.0416	84.3259	64.9958	59.1896	61.5377	33.9757	49.3163	92.9521	53.977	NaN	NaN	NaN	12.4117	39.461	67.8105
Iqcj-Schip1;Iqcj-Schip1;Schip1;Schip1;Schip1;Schip1;Schip1;Schip1;Schip1	IQCJ-SCHIP1 readthrough transcript protein;Isoform Iqcj-schip1-2 of IQCJ-SCHIP1 readthrough transcript protein;Schwannomin interacting protein 1 isoform c;Schwannomin interacting protein 1 (Fragment);Schwannomin-interacting protein 1;Isoform Schip1-2 of Schwannomin-interacting protein 1;Isoform Schip1-3 of Schwannomin-interacting protein 1;Isoform Schip1-4 of Schwannomin-interacting protein 1;Sch…	IQIP1_MOUSE;IQIP1_MOUSE;A0A097PIJ2_MOUSE;A0A0A6YXQ5_MOUSE;SCHI1_MOUSE;SCHI1_MOUSE;SCHI1_MOUSE;SCHI1_MOUSE;S4R1J0_MOUSE		NaN	7.15444	11.9808	11.2141	14.0588	NaN	NaN	NaN	1.95734	19.0319	15.786	NaN	NaN	NaN	NaN	NaN
Gfra1	GDNF family receptor alpha;GDNF family receptor alpha;GDNF family receptor alpha-1	A0A097BVN3_MOUSE;A0A7R7YCZ3_MOUSE;GFRA1_MOUSE		92.8546	67.827	102.425	105.199	86.1961	77.8741	83.1655	70.6951	113.92	87.7187	104.207	94.1784	55.4365	108.497	89.6851	103.118
	Anti-dectin-1 15E2 light chain	A0A097PUD0_MOUSE		258.011	271.203	68.0271	105.285	126.081	130.037	83.2641	71.6467	78.018	115.979	69.9192	85.2959	79.4071	83.9867	91.3898	112.133
Gcdh	Glutaryl-CoA dehydrogenase, mitochondrial;Glutaryl-CoA dehydrogenase, mitochondrial;Glutaryl-CoA dehydrogenase, mitochondrial	A0A0A0MQ68_MOUSE;A0A1S6GWJ2_MOUSE;GCDH_MOUSE		544.228	569.21	591.086	572.405	480.709	470.723	503.332	490.189	684.984	730.116	841.59	797.824	524.69	569	635.053	634.55
Kmt2d	[histone H3]-lysine(4) N-methyltransferase;Histone-lysine N-methyltransferase 2D	A0A0A0MQ73_MOUSE;KMT2D_MOUSE		88.4095	141.499	47.5629	63.5003	121.653	70.7422	61.0808	58.1758	74.8463	80.3723	51.6761	53.5892	54.9504	74.3671	54.4367	72.2129
Prrc2c	Proline-rich coiled-coil 2C;Protein PRRC2C	A0A0A0MQ79_MOUSE;PRC2C_MOUSE		410.256	396.97	297.511	283.722	367.954	368.98	313.707	320.747	361.118	370.617	275.336	269.804	386.084	383.726	343.144	368.639
Afg2a	vesicle-fusing ATPase;Spermatogenesis associated 5;Spata5 protein;ATPase family gene 2 protein homolog A	A0A0A0MQ80_MOUSE;A0A0G2JFY0_MOUSE;B7ZNK9_MOUSE;AFG2A_MOUSE		51.8348	61.1035	40.7666	42.4249	62.8172	67.4479	47.2272	48.6713	47.8899	49.5295	38.85	35.4297	43.9323	62.5646	40.7517	48.8633
Map3k6	mitogen-activated protein kinase kinase kinase;Mitogen-activated protein kinase kinase kinase 6	A0A0A0MQ82_MOUSE;M3K6_MOUSE		50.4036	62.7509	33.5712	37.9245	55.3953	58.9914	43.1137	45.4852	37.8707	33.3624	26.8387	28.2672	37.7678	34.7052	39.6156	38.1163
Sos2	SOS Ras/Rho guanine nucleotide exchange factor 2;Son of sevenless homolog 2	A0A0A0MQ87_MOUSE;SOS2_MOUSE		420.649	435.411	396.529	403.664	427.117	462.948	419.012	406.43	419.403	424.57	414.691	419.415	401.821	443.902	466.721	492.174
Actr5	Actin-related protein 5	A0A0A0MQ89_MOUSE;ARP5_MOUSE		136.732	105.483	98.867	96.5531	103.141	106.306	120.525	93.5585	95.3321	88.3968	92.9325	89.497	90.2639	102.299	90.0838	92.9028
S100a13	Protein S100-A13;Protein S100-A13;S100/CaBP-9k-type calcium binding subdomain domain-containing protein	A0A0A0MQ90_MOUSE;S10AD_MOUSE;Q545H7_MOUSE		210.726	265.069	173.47	140.158	398.838	429.595	293.561	307.498	256.411	231.691	285.974	214.956	326.27	421.884	296.07	255.836
Tenm2	Teneurin transmembrane protein 2;Teneurin transmembrane protein 2;Odz2 protein;Teneurin-2	A0A0A0MQ92_MOUSE;A0A0A0MQB7_MOUSE;B9EJ72_MOUSE;TEN2_MOUSE		216.339	230.136	153.594	226.075	225.023	232.685	221.805	235.381	279.822	232.663	176.643	213.446	218.576	242.314	172.246	232.908
Nccrp1	Non-specific cytotoxic cell receptor protein 1 homolog (zebrafish);F-box only protein 50	A0A0A0MQ97_MOUSE;FBX50_MOUSE		55.8094	38.6045	14.3225	NaN	NaN	NaN	NaN	NaN	NaN	NaN	23.9918	NaN	NaN	NaN	37.6482	33.641
Swi5	DNA repair protein SWI5 homolog	A0A0A0MQ99_MOUSE		67.2483	70.1142	77.2758	76.5508	80.5577	94.8881	104.796	84.5506	74.9738	84.0714	119.071	83.0853	75.5344	91.5191	103.895	88.6381
Serpina1a;Serpina1c;Serpina1a;Serpina1c	Serine (or cysteine) peptidase inhibitor, clade A, member 1A;Serine (or cysteine) peptidase inhibitor, clade A, member 1C;Alpha-1-antitrypsin 1-1;Alpha-1-antitrypsin 1-3	A0A0A0MQA3_MOUSE;A0A0R4J0X5_MOUSE;A1AT1_MOUSE;A1AT3_MOUSE		NaN	NaN	NaN	NaN	NaN	102.755	NaN	NaN	49.0743	57.1587	52.1466	49.1098	68.6754	84.8671	75.8586	79.3249
Plekhg5	Pleckstrin homology domain containing, family G (with RhoGef domain) member 5;PLEKHG5 (Fragment);Pleckstrin homology domain containing, family G (with RhoGef domain) member 5;Pleckstrin homology domain containing, family G (with RhoGef domain) member 5;Pleckstrin homology domain-containing family G member 5;Isoform 2 of Pleckstrin homology domain-containing family G member 5	A0A0A0MQC2_MOUSE;A0A2X0SG37_MOUSE;A0A5F8MPI8_MOUSE;B1AS67_MOUSE;PKHG5_MOUSE;PKHG5_MOUSE		307.895	286.814	280.279	279.508	344.617	363.341	353.11	342.212	254.858	272.599	249.174	234.424	245.334	251.108	267.96	254.381
Elapor1	Endosome-lysosome associated apoptosis and autophagy regulator 1	A0A0A0MQC6_MOUSE		99.6045	95.6268	118.068	113.176	109.663	114.768	113.702	118.802	87.6242	96.4666	104.462	104.498	111.854	136.463	153.706	141.792
Tdrd7	Tudor domain-containing protein 7	A0A0A0MQD1_MOUSE;TDRD7_MOUSE		490.248	496.922	424.974	440.931	400.235	417.499	385.159	352.136	304.993	364.764	355.816	326.411	470.947	458.832	492.985	462.795
9530068E07Rik;9530068E07Rik;9530068E07Rik;Kct2	RIKEN cDNA 9530068E07 gene;Keratinocyte-associated transmembrane protein 2;Keratinocyte-associated transmembrane protein 2;Keratinocyte-associated transmembrane protein 2	A0A0A0MQD4_MOUSE;Q3U339_MOUSE;Q3ULW9_MOUSE;KCT2_MOUSE		160.714	79.1111	107.318	125.157	78.2429	76.9745	112.759	117.875	84.6465	96.1791	112.476	91.279	102.364	80.0831	202.904	57.4645
Ralgapa2	Ral GTPase activating protein, alpha subunit 2 (catalytic);Ral GTPase activating protein, alpha subunit 2 (catalytic);Ral GTPase-activating protein subunit alpha-2	A0A0A0MQD7_MOUSE;A0A2I3BPN8_MOUSE;RGPA2_MOUSE		95.8958	113.199	93.4767	97.3873	153.078	127.641	104.489	103.314	84.1822	100.136	78.9134	85.3454	90.1064	77.7743	78.457	82.9431
Ralgps1	Ral GEF with PH domain and SH3 binding motif 1;Ras-specific guanine nucleotide-releasing factor RalGPS1	A0A0A0MQE4_MOUSE;RGPS1_MOUSE		184.908	155.744	144.047	151.672	172.089	158.532	156.975	176.871	181.99	186.179	166.131	157.596	140.898	158.358	137.054	145.219
Camsap1	Calmodulin regulated spectrin-associated protein 1	A0A0A0MQE5_MOUSE		797.421	782.475	777.965	787.923	801.044	805.328	785.752	776.796	609.572	597.99	615.566	604.177	593.248	606.283	683.803	662.859
Gapdh	Glyceraldehyde-3-phosphate dehydrogenase	A0A0A0MQF6_MOUSE;D2KHZ9_MOUSE;G3P_MOUSE		12086.3	11629	10102.9	10456.8	10193.2	10284.5	10775.6	11426.7	26530.4	27059.2	25930.6	26346	22224.8	22465.7	20813.2	22629.9
Macf1	Microtubule-actin crosslinking factor 1 (Fragment)	A0A0A0MQH5_MOUSE		39.9525	54.5848	48.1936	43.4983	31.8553	55.6581	29.1345	42.0187	31.8695	49.3503	47.6552	35.9707	57.3037	47.7304	52.8481	69.2403
Slc25a14	Solute carrier family 25 (mitochondrial carrier, brain), member 14;Brain mitochondrial carrier protein long-inserted form;Brain mitochondrial carrier protein short-inserted form;Brain mitochondrial carrier protein 1;Isoform 2 of Brain mitochondrial carrier protein 1	A0A0A0MQJ8_MOUSE;Q8CJ23_MOUSE;Q8CJ24_MOUSE;UCP5_MOUSE;UCP5_MOUSE		62.7992	105.992	68.5372	73.7346	61.8809	45.7989	51.0665	43.2506	46.1505	61.5477	53.1918	65.312	79.4384	79.0175	70.0826	65.7211
Eif5a	Eukaryotic translation initiation factor 5A (Fragment);Eukaryotic translation initiation factor 5A-1	A0A0A0MQM0_MOUSE;IF5A1_MOUSE		918.556	1012.09	928.119	974.312	1007.25	1042.88	1064.39	1051.37	901.443	852.489	1003.39	1016.39	1114.76	1141.22	906.37	961.484
Ttc28	Tetratricopeptide repeat domain 28;Tetratricopeptide repeat protein 28	A0A0A0MQN9_MOUSE;TTC28_MOUSE		559.169	519.098	463.345	471.975	492.331	474.78	471.894	414.141	362.964	431.424	392.858	388.563	384.463	486.597	429.947	395.114
Tmco1	Calcium load-activated calcium channel (Fragment);Calcium load-activated calcium channel (Fragment);Calcium load-activated calcium channel	A0A0A6YVS2_MOUSE;Q3V4A0_MOUSE;TMCO1_MOUSE		78.8322	145.148	103.019	106.549	108.26	92.4392	97.0949	85.2928	144.728	125.916	135.105	129.524	110.839	86.9147	101.214	111.358
Adrm1b;Adrm1	Adhesion regulating molecule 1B;Proteasomal ubiquitin receptor ADRM1	A0A0A6YVU8_MOUSE;ADRM1_MOUSE		2619.61	2531.64	2552.73	2574.21	3106.62	3391.72	2962.51	3153.29	2961.28	2837.13	3041.57	3110.62	3234.67	3171.05	3231.14	3297.45
Map9	Microtubule-associated protein 9 (Fragment);Microtubule-associated protein 9 (Fragment);Microtubule-associated protein 9	A0A0A6YVV4_MOUSE;A0A0A6YXJ3_MOUSE;MAP9_MOUSE		137.598	130.998	109.087	114.214	53.1492	66.6881	55.4924	80.2698	163.268	171.266	175.854	165.074	90.6064	101.478	100.047	90.2972
Mbnl1	Muscleblind like splicing factor 1	A0A0A6YVV8_MOUSE;A0A0A6YWB0_MOUSE		87.0832	95.6151	89.7114	81.0227	59.0644	68.7311	70.4212	76.8889	97.6525	89.4636	71.9507	61.6767	57.6006	68.6889	118.827	114.46
Lin9	Protein lin-9 homolog;Lin-9 DREAM MuvB core complex component;Protein lin-9 homolog	A0A0A6YVZ7_MOUSE;A0A0A6YWD3_MOUSE;LIN9_MOUSE		131.204	NaN	60.8934	63.6108	67.8671	79.0279	65.8928	86.8997	84.109	93.9022	72.9029	66.9022	72.2387	73.9857	112.607	100.714
Rgs7	Regulator of G protein signaling 7	A0A0A6YW36_MOUSE		521.207	522.172	548.818	572.476	541.618	493.381	527.295	562.907	587.231	594.04	675.78	768.065	521.464	529.471	566.608	615.677
Atp6v1h	ATPase, H+ transporting, lysosomal V1 subunit H (Fragment)	A0A0A6YW86_MOUSE		106.967	124.215	81.6875	97.1602	73.1604	85.3773	87.7846	104.638	115.362	149.544	91.2581	85.6349	95.1993	70.0948	95.3062	116.749
Cnih4	Protein cornichon homolog 4	A0A0A6YW87_MOUSE;CNIH4_MOUSE		404.757	463.601	98.581	77.7091	289.551	366.125	177.779	217.865	281.879	241.564	216.073	190.347	323.432	278.473	NaN	52.2255
Slc38a3	Solute carrier family 38, member 3 (Fragment);Solute carrier family 38, member 3 (Fragment);Sodium-coupled neutral amino acid transporter 3	A0A0A6YWF5_MOUSE;A0A0A6YX60_MOUSE;S38A3_MOUSE		323.621	390.924	161.046	189.962	302.816	335.956	254.294	212.525	139.877	149.179	220.103	212.481	264.745	275.495	258.316	250.513
Rapgef2	Rap guanine nucleotide exchange factor 2	A0A0A6YWG7_MOUSE		1216.2	1177.38	1423.77	1296.13	1330.51	1408.84	1445.82	1327.03	1263.84	978.782	1405.19	1343.83	1150.01	1028.15	900.188	939.353
Klhdc8b	Kelch domain-containing protein 8B	A0A0A6YWH8_MOUSE;KLD8B_MOUSE		133.906	142.736	103.1	102.666	119.362	111.119	94.6076	115.15	148.432	152.034	125.344	107.796	129.9	138.221	130.433	138.555
Zfp704;Znf704	Zinc finger protein 704 (Fragment);Zinc finger protein 704	A0A0A6YWL6_MOUSE;ZN704_MOUSE		708.027	940.863	523.005	540.09	793.301	657.809	759.923	741.342	778.774	569.936	639.239	317.826	638.567	633.304	1387.33	590.127
Ankrd39	Ankyrin repeat domain 39;Ankyrin repeat domain 39;Ankyrin repeat domain-containing protein 39	A0A0A6YWV1_MOUSE;Q14A32_MOUSE;ANR39_MOUSE		NaN	NaN	78.6729	66.1743	65.1247	62.8988	69.7007	51.0805	58.4484	58.9789	51.422	67.9832	49.0285	61.7526	46.5634	49.6552
Usp19	ubiquitinyl hydrolase 1	A0A0A6YWX1_MOUSE;J3KMM1_MOUSE		879.519	900.282	924.697	933.353	816.685	823.287	854.488	885.94	827.98	905.861	872.232	880.108	846.276	865.057	878.188	930.069
Tbc1d8	TBC1 domain family, member 8;TBC1 domain family member 8	A0A0A6YWY1_MOUSE;TBCD8_MOUSE		294.211	274.334	257.547	282.785	178.458	195.216	189.819	198.237	164.895	157.159	175.784	158.939	274.961	281.247	237.542	232.663
D3Ertd751e	DNA segment, Chr 3, ERATO Doi 751, expressed (Fragment);UPF0462 protein C4orf33 homolog	A0A0A6YWY5_MOUSE;CD033_MOUSE		311.709	126.338	69.812	79.2329	121.014	82.3769	99.234	114.456	124.173	106.192	119.852	126.199	113.95	118.669	94.4916	100.04
Pcdh9	Protocadherin 9;Protocadherin 9;Pcdh9 protein;Pcdh9 protein;Protocadherin 9;Protocadherin 9	A0A0A6YWY8_MOUSE;A0A0A6YY09_MOUSE;B2RXR7_MOUSE;B2RY66_MOUSE;B2RY69_MOUSE;F8VPK8_MOUSE		94.5216	95.4876	85.7705	70.4946	111.874	104.841	89.4169	91.269	81.4	85.2481	95.2091	84.3687	81.3129	72.7221	94.2332	86.1283
Atp6v1h	V-type proton ATPase subunit H	A0A0A6YX18_MOUSE		11254.2	11463.1	10548.8	10525.7	11889.6	12780.5	11390.2	11338.2	12518.6	12344.4	11788.8	11901.2	11085.3	11251.1	10164.9	10130.1
Sft2d2	SFT2 domain containing 2;Vesicle transport protein;Vesicle transport protein SFT2B	A0A0A6YX21_MOUSE;A0A0A6YY20_MOUSE;SFT2B_MOUSE		18.3954	27.2663	14.5654	21.9479	NaN	NaN	21.5641	NaN	15.1101	18.3566	22.4754	NaN	20.2356	31.1072	33.9648	28.7168
Lman2l	Lectin, mannose-binding 2-like (Fragment);Lectin, mannose-binding 2-like;VIP36-like protein	A0A0A6YX25_MOUSE;D3Z4P2_MOUSE;LMA2L_MOUSE		102.331	119.702	125.938	121.907	160.755	146.124	122.195	100.438	85.064	93.5131	85.7283	108.362	138.828	134.781	130.744	139.881
Dclk2	non-specific serine/threonine protein kinase;Isoform 4 of Serine/threonine-protein kinase DCLK2;Isoform 5 of Serine/threonine-protein kinase DCLK2	A0A0A6YX71_MOUSE;DCLK2_MOUSE;DCLK2_MOUSE		283.957	294.545	244.725	264.498	205.74	205.699	196.83	160.597	265.906	181.809	202.428	257.891	263.105	266.963	376.517	361.465
Prkar2a	cAMP-dependent protein kinase type II-alpha regulatory subunit	A0A0A6YX73_MOUSE;Q8K1M3_MOUSE		3877.79	3984.88	3379.74	3393.01	3529.37	3440.68	3117.03	3135.01	3557.14	3646.6	3321.4	3417.99	4343.24	4437.16	4078.25	4050.41
Fpgs	Folylpolyglutamyl synthetase;Folylpolyglutamyl synthetase (Fragment);Folylpolyglutamate synthase, mitochondrial;Isoform 2 of Folylpolyglutamate synthase, mitochondrial;Isoform 3 of Folylpolyglutamate synthase, mitochondrial;Isoform 4 of Folylpolyglutamate synthase, mitochondrial;Isoform 5 of Folylpolyglutamate synthase, mitochondrial	A0A0A6YX96_MOUSE;A2AK70_MOUSE;FOLC_MOUSE;FOLC_MOUSE;FOLC_MOUSE;FOLC_MOUSE;FOLC_MOUSE		NaN	NaN	NaN	11.6236	NaN	NaN	NaN	NaN	NaN	29.453	30.5191	NaN	NaN	16.283	NaN	47.8685
Rcsd1	RCSD domain containing 1 (Fragment);CapZ-interacting protein;Isoform 2 of CapZ-interacting protein	A0A0A6YXA9_MOUSE;CPZIP_MOUSE;CPZIP_MOUSE		NaN	NaN	19.2081	NaN	24.6048	NaN	15.0412	24.6678	18.1532	11.1809	20.0887	10.9442	22.4354	3.44815	NaN	NaN
Mast4	non-specific serine/threonine protein kinase;non-specific serine/threonine protein kinase;non-specific serine/threonine protein kinase;non-specific serine/threonine protein kinase;Microtubule-associated serine/threonine-protein kinase 4	A0A0A6YXG1_MOUSE;A0A668KMA1_MOUSE;E9PWX8_MOUSE;E9QPR4_MOUSE;MAST4_MOUSE		106.562	114.233	86.5789	79.8735	111.355	108.324	99.6942	103.34	67.8192	65.5804	65.5235	64.2888	81.6115	79.2164	69.1466	66.0971
Osbpl9	Oxysterol-binding protein	A0A0A6YXH3_MOUSE		1022.05	908.167	762.122	810.096	620.622	634.259	572.101	655	961.742	623.463	684.888	594.114	663.832	664.286	425.134	660.397
Cep170	Centrosomal protein 170 (Fragment)	A0A0A6YXK7_MOUSE		15.8997	4.80003	8.93422	7.68751	NaN	15.4513	11.6297	NaN	NaN	4.3105	NaN	NaN	NaN	6.60785	9.01628	4.96647
Rcor3	REST corepressor 3	A0A0A6YXM5_MOUSE		91.0285	99.5606	95.7416	95.1873	109.294	106.006	114.79	116.636	95.5272	96.7487	103.858	92.8107	118.728	110.86	121.965	111.814
Ighv1-18	Immunoglobulin heavy variable V1-18 (Fragment)	A0A0A6YXN4_MOUSE		NaN	NaN	NaN	NaN	NaN	NaN	22.8792	NaN	19.7143	28.7314	34.4064	32.9031	NaN	NaN	43.3795	NaN
Cept1	Choline/ethanolaminephosphotransferase 1 (Fragment);Choline/ethanolaminephosphotransferase 1 (Fragment);Choline/ethanolaminephosphotransferase 1 (Fragment);Choline/ethanolaminephosphotransferase 1;Isoform 2 of Choline/ethanolaminephosphotransferase 1	A0A0A6YXR0_MOUSE;D3YX12_MOUSE;D3Z5Y5_MOUSE;CEPT1_MOUSE;CEPT1_MOUSE		235.957	280.664	527.272	231.78	219.321	282.16	234.327	250.955	499.737	342.808	448.516	379.165	368.586	387.894	257.469	234.6
Pcdhga7	Protocadherin gamma subfamily A, 7;Cadherin domain-containing protein	A0A0A6YXT1_MOUSE;Q8BS92_MOUSE		56.7034	87.8708	41.7433	41.0592	57.0638	32.3945	29.9849	55.2916	51.2207	NaN	36.8303	30.6317	50.1548	45.6357	37.7567	27.964
Nr5a2	Nuclear receptor subfamily 5, group A, member 2;Nuclear receptor subfamily 5 group A member 2;Liver receptor-like protein 1 variant 2	A0A0A6YY04_MOUSE;NR5A2_MOUSE;Q1WLP7_MOUSE		310.534	195.934	236.334	238.386	387.141	379.402	308.928	351.233	430.66	409.422	470.209	477.651	407.508	457.383	179.227	143.348
Ncam1	Neural cell adhesion molecule 1	A0A0A6YY47_MOUSE		3151.4	3320.11	2951.09	2937.25	2480.8	2439.27	2463.04	2329.7	2442.7	2590.4	2773.7	2772.03	3787.51	3711.92	3418.73	3270.82
Camsap2	Calmodulin regulated spectrin-associated protein family, member 2;Camsap1l1 protein;Calmodulin regulated spectrin-associated protein family, member 2;Calmodulin-regulated spectrin-associated protein 2	A0A0A6YY67_MOUSE;B2RRE3_MOUSE;H7BX08_MOUSE;CAMP2_MOUSE		1505.55	1575.07	1562.42	1568.07	1575.73	1535.16	1577.2	1622.01	1231.73	1286.49	1265.92	1220.59	1135.39	1138.23	1187.67	1208.6
Impdh2	Inosine monophosphate dehydrogenase 2 (Fragment)	A0A0A6YY72_MOUSE		110.561	120.184	78.5195	44.1391	93.8434	67.3155	49.8728	84.9114	71.5153	60.7518	54.5579	66.3103	66.297	58.2439	93.7127	95.2519
Pcdh7	Protocadherin 7	A0A0A6YY83_MOUSE;E9Q2S0_MOUSE		532.08	567.184	561.541	537.695	680.961	636.899	643.773	643.496	590.896	614.483	638.599	631.406	588.881	568.428	550.126	571.9
Ncam1	Neural cell adhesion molecule 1 (Fragment)	A0A0A6YY91_MOUSE		835.38	795.831	771.081	725.132	378.573	443.37	422.05	400.313	626.627	635.432	553.933	592.242	601.332	657.129	614.994	687.676
Snw1	SNW domain-containing protein 1	A0A0B4J1E2_MOUSE;SNW1_MOUSE		203.491	210.469	185.531	204.679	235.68	217.901	241.734	251.865	197.973	193.795	223.032	201.389	227.385	196.399	197.798	168.691
Uck2	uridine/cytidine kinase (Fragment);Uridine-cytidine kinase;Uridine-cytidine kinase;Uridine-cytidine kinase 2	A0A0B4J1E5_MOUSE;Q543C2_MOUSE;Q8C476_MOUSE;UCK2_MOUSE		181.626	185.461	157.87	143.696	114.861	127.91	138.65	141.972	112.44	142.241	136.799	115.442	134.954	139.848	149.89	147.442
Kpna4	Karyopherin (importin) alpha 4;Importin subunit alpha-3;IBB domain-containing protein (Fragment);Importin subunit alpha	A0A0B4J1E7_MOUSE;IMA3_MOUSE;Q3UGH8_MOUSE;Q4FJX1_MOUSE		7204.76	7616.64	6716.87	6881.4	6231.36	6067.45	6185.7	6012.26	6364.7	6303.19	6050.36	6132.16	5630.12	5664.83	6791.61	6834.88
Stoml1	Stomatin-like 1;Band 7 domain-containing protein (Fragment);Stomatin-like protein 1	A0A0B4J1F1_MOUSE;Q3UFS9_MOUSE;STML1_MOUSE		28.9085	52.9685	38.9282	32.5229	36.9208	51.3616	41.6699	46.9002	52.1798	71.1045	37.4717	44.7352	38.8745	44.2929	55.4481	48.4616
Igbp1b	Immunoglobulin (CD79A) binding protein 1b;Immunoglobulin-binding protein 1b	A0A0B4J1F7_MOUSE;IGB1B_MOUSE		73.9626	50.9177	56.6533	56.9222	91.4141	44.6021	53.3321	54.9403	43.5366	46.9855	40.5982	75.3886	67.2794	64.2322	47.2086	56.7104
Tchh	Trichohyalin;Trichohyalin (Fragment)	A0A0B4J1F9_MOUSE;Q3V203_MOUSE		348.761	303.587	360.841	408.804	333.213	289.715	331.283	319.201	137.163	152.845	215.96	137.411	274.296	283.628	265.654	271.826
Ighv9-3	Immunoglobulin heavy variable V9-3 (Fragment)	A0A0B4J1J5_MOUSE		NaN	NaN	NaN	NaN	NaN	NaN	NaN	NaN	NaN	20.4479	25.5614	33.3821	17.523	24.9243	68.8923	67.4057
Ighv1-82	Immunoglobulin heavy variable 1-82	A0A0B4J1J7_MOUSE		39.9939	NaN	NaN	NaN	NaN	NaN	NaN	NaN	91.8238	110.721	99.643	102.687	34.9251	33.0813	37.6486	52.1137
Obsl1	Obscurin-like 1;Obscurin-like 1;Obscurin-like protein 1	A0A0B4J1L4_MOUSE;A0A803ZIZ6_MOUSE;OBSL1_MOUSE		119.637	87.9121	75.9051	87.3198	91.9207	91.2079	93.9669	86.0959	68.9744	71.0377	77.3784	74.9928	76.2215	104.499	65.5895	74.3133
Eef1akmt1	EEF1A lysine methyltransferase 1	A0A0D2X7Z2_MOUSE;EFMT1_MOUSE		1099.55	1152.85	1140.57	1110.1	1298.69	1247.57	1109.48	1166.96	1192.04	1140.89	1221.15	1128.95	1260.69	1172.04	1051.76	1025.06
;Igk;Igk;Igkc;Igk	IgE L chain kappa;Light chain kappa;Light chain kappa;If kappa light chain (Fragment);Igk protein	A0A0D5ZY64_MOUSE;A0A125T906_MOUSE;A0A125T908_MOUSE;A2NHM3_MOUSE;Q58EU8_MOUSE		184.449	NaN	NaN	NaN	NaN	NaN	NaN	NaN	73.1927	90.4524	NaN	74.7031	77.5734	91.1128	67.5574	98.7586
HC	MAb 44B1 heavy chain	A0A0E4B366_MOUSE		65.2025	55.8386	88.4199	88.9673	88.8606	117.235	112.74	98.1483	526.63	677.787	682.55	699.662	1122.57	1136.64	1646.18	1619.84
Ldah	Lipid droplet-associated hydrolase	A0A0F6AIX5_MOUSE		265.113	232.769	229.412	208.054	220.172	180.305	209.066	192.593	200.402	219.26	262.05	230.399	228.729	203.914	270.084	267.912
Adgrl2	Adhesion G protein-coupled receptor L2	A0A0G2JDF4_MOUSE;A0A0G2JFV3_MOUSE		73.0488	79.6668	73.0935	76.8289	66.2262	66.3671	61.99	71.0644	63.5965	69.3592	57.5229	62.4077	62.6761	68.1704	84.2295	88.1732
Klf3	Kruppel-like factor 3 (basic) (Fragment);Basic Kruppel-like transcription factor;Krueppel-like factor 3	A0A0G2JDH4_MOUSE;Q545J5_MOUSE;KLF3_MOUSE		25.7894	37.0381	24.9722	29.5957	13.8401	24.7866	20.9411	13.7046	10.6183	18.3244	17.8787	8.32075	31.6303	22.6095	29.819	32.912
Prom1	Prominin 1;Prominin 1;Prominin 1;Prominin 1;Prominin 1;Prominin-1;Isoform 2 of Prominin-1;Isoform 3 of Prominin-1;Isoform 4 of Prominin-1;Isoform 5 of Prominin-1;Isoform 6 of Prominin-1;Prominin 1;Prom1 protein	A0A0G2JDH9_MOUSE;A0A0G2JE50_MOUSE;A0A0R4J0B0_MOUSE;G3X9J8_MOUSE;G5E8G5_MOUSE;PROM1_MOUSE;PROM1_MOUSE;PROM1_MOUSE;PROM1_MOUSE;PROM1_MOUSE;PROM1_MOUSE;Q8CDK8_MOUSE;Q8R056_MOUSE		69.3829	77.2614	92.7643	91.1731	66.9395	81.9244	97.4757	86.9191	69.5679	NaN	39.6496	NaN	NaN	59.4385	114.615	75.6225
Celf3	CUGBP, Elav-like family member 3;CUGBP, Elav-like family member 3 (Fragment);CUGBP, Elav-like family member 3 (Fragment);CUGBP, Elav-like family member 3	A0A0G2JDL2_MOUSE;A0A0G2JDX3_MOUSE;A0A0G2JFA4_MOUSE;A0A0G2JGX2_MOUSE		306.753	309.168	331.242	327.214	344.928	323.781	379.774	351.105	314.208	300.803	268.296	299.847	274.68	294.21	325.066	300.376
Anapc5	Anaphase-promoting complex subunit 5	A0A0G2JDM7_MOUSE;Q3U981_MOUSE;APC5_MOUSE		879.609	889.924	776.732	774.707	853.646	878.206	809.071	826.076	815.025	828.363	746.433	803.61	824.258	881.056	831.895	810.001
Map4	Microtubule-associated protein	A0A0G2JDN7_MOUSE		712.77	699.897	531.325	542.184	758.125	762.172	605.64	627.321	718.933	653.448	641.503	626.082	659.623	646.473	522.87	509.914
Mef2c	Myocyte enhancer factor 2C;Myocyte-specific enhancer factor 2C;Isoform 3 of Myocyte-specific enhancer factor 2C	A0A0G2JDQ1_MOUSE;MEF2C_MOUSE;MEF2C_MOUSE		613.27	616.526	717.034	692.98	945.233	947.521	968.543	908.424	980.1	961.574	913.239	946.128	585.148	566.858	491.928	553.771
Lrrc7	Leucine rich repeat containing 7;Leucine rich repeat containing 7 (Fragment);Leucine rich repeat containing 7;Leucine rich repeat containing 7;Leucine-rich repeat-containing protein 7	A0A0G2JDT9_MOUSE;A0A0G2JFZ5_MOUSE;A0A571BEA5_MOUSE;E9Q6L9_MOUSE;LRRC7_MOUSE		149.972	164.393	140.006	142.505	120.605	123.225	114.429	114.211	134.487	122.145	119.915	120.729	124.074	127.606	187.582	191.793
Gm42878;Mapkapk5;Mapkapk5	Predicted gene 42878;Isoform 5 of MAP kinase-activated protein kinase 5;Protein kinase domain-containing protein	A0A0G2JDU2_MOUSE;MAPK5_MOUSE;Q3UV25_MOUSE		215.53	245.496	200.893	202.269	198.707	187.823	196.559	205.028	213.833	213.955	200.848	212.72	200.176	196.973	154.382	160.62
Gbp6;Gbp6;Gm43302	Guanylate-binding protein 6;Guanylate binding protein 6;Predicted gene 43302	GBP6_MOUSE;A0A8Q0QEH4_MOUSE;L7N1X8_MOUSE		184.33	205.786	157.761	175.897	181.041	180.014	188.642	195.797	190.569	175.559	196.303	192.502	222.6	229.078	250.609	259.246
Rps27	40S ribosomal protein S27 (Fragment);Small ribosomal subunit protein eS27	A0A0G2JDW7_MOUSE;RS27_MOUSE		2129.05	2175.44	1087.13	1490.61	3228.03	3023.77	1739.09	1511.72	1806.78	1700.03	1160.49	1408.92	1947.92	1572.22	1464.63	1495.51
Tspan2	Tetraspanin 2 (Fragment);Tetraspanin 2;Tetraspanin (Fragment);Tetraspanin-2;Tetraspanin	A0A0G2JDX4_MOUSE;A0A0G2JEZ7_MOUSE;Q8C0C9_MOUSE;TSN2_MOUSE;Q9D1X8_MOUSE		436.451	477.118	581.548	571.227	502.94	536.486	474.851	559.728	397.032	550.252	523.763	556.236	571.31	571	892.391	718.992
Myl10	Myosin, light chain 10, regulatory;Myosin, light chain 10, regulatory	A0A0G2JDZ4_MOUSE;E9QNY3_MOUSE		NaN	NaN	381.006	407.027	750.891	817.64	649.282	690.586	240.865	300.874	NaN	NaN	394.064	504.391	NaN	NaN
Ankrd17	Ankyrin repeat domain 17;Ankyrin repeat domain 17;Ankyrin repeat domain-containing protein 17	A0A0G2JDZ9_MOUSE;E9Q804_MOUSE;ANR17_MOUSE		183.331	171.765	143.835	145.624	141.03	142.681	144.52	151.111	129.236	126.98	112.841	116.456	137.966	149.122	166.703	173.751
Ube2d3	Ubiquitin-conjugating enzyme E2 D3 (Fragment);Ubiquitin-conjugating enzyme E2 D3;Ubiquitin-conjugating enzyme E2 D3;Ubiquitin-conjugating enzyme E2 D3;Ubiquitin-conjugating enzyme E2 D3	A0A0G2JE32_MOUSE;A0A0G2JGL0_MOUSE;UB2D3_MOUSE;Q4QQL2_MOUSE;Q9D1S1_MOUSE		979.018	679.521	844.564	784.3	836.18	889.059	941.674	876.32	857.687	1019.01	893.553	1020.57	838.132	760.279	695.492	872.122
Iglc1;Iglv2;;;Iglv1	Immunoglobulin lambda constant 1 (Fragment);LOC207685 protein (Fragment);Anti-human Langerin 2G3 lambda chain;Ig lambda-1 chain C region;Ig-like domain-containing protein	A0A0G2JE99_MOUSE;A4FU62_MOUSE;G0YP42_MOUSE;LAC1_MOUSE;Q9D8W4_MOUSE		NaN	NaN	NaN	NaN	NaN	9.55792	7.75716	8.6723	61.1322	85.4653	73.7805	69.8168	51.2142	57.461	92.3793	77.5438
Rbm8a	RNA-binding protein 8A;RNA-binding protein 8A;RNA-binding protein 8A;Isoform 2 of RNA-binding protein 8A	A0A0G2JEA9_MOUSE;A0A0G2JFX7_MOUSE;RBM8A_MOUSE;RBM8A_MOUSE		194.898	244.078	172.184	132.445	215.975	230.47	188.888	248.167	145.638	159.452	185.08	157.712	202.102	196.538	131.715	154.93
Sh3glb1	Endophilin-B1	A0A0G2JEC4_MOUSE		NaN	NaN	20.89	34.7198	31.0105	32.4514	16.0204	18.9876	44.9766	29.0632	42.0659	33.1714	35.6518	36.9779	23.5761	30.5699
Amph	Amphiphysin	A0A0G2JEG8_MOUSE;AMPH_MOUSE		36622.9	37877.6	35544.3	34907.5	38132.9	36456.7	39131	38084.4	35261.7	33958.8	37099	36767.8	35464.3	35603.9	29701.4	31520.3
Tmem243	Transmembrane protein 243, mitochondrial;Transmembrane protein 243, mitochondrial	A0A0G2JEH3_MOUSE;B2RVB9_MOUSE		61.6595	NaN	95.6547	82.6609	42.8098	76.1292	88.6999	69.5888	57.1776	92.4528	75.4729	69.9398	52.6786	50.0766	143.528	139.224
Crip1	Cysteine-rich protein 1 (intestinal);Cysteine-rich protein 1	A0A0G2JEK2_MOUSE;CRIP1_MOUSE		382.272	465.977	412.553	400.84	289.216	284.738	303.944	330.976	331.06	317.664	336.688	255.762	390.046	416.22	484.159	525.994
Arhgap29	Rho GTPase activating protein 29 (Fragment);Rho GTPase-activating protein 29 (Fragment);Rho GTPase-activating protein 29;Isoform 2 of Rho GTPase-activating protein 29	A0A0G2JEL5_MOUSE;A0A0G2JEY0_MOUSE;RHG29_MOUSE;RHG29_MOUSE		NaN	275.658	629.044	NaN	NaN	NaN	NaN	11.7679	2.17063	NaN	18.7848	NaN	19.6916	14.0607	20.2791	28.7401
Fxr1	RNA-binding protein FXR1;RNA-binding protein FXR1;Isoform B of RNA-binding protein FXR1;Isoform C of RNA-binding protein FXR1	A0A0G2JEP0_MOUSE;FXR1_MOUSE;FXR1_MOUSE;FXR1_MOUSE		281.814	266.549	172.995	222.634	258.099	253.103	198.399	217.028	151.104	158.782	116.098	134.008	192.904	238.675	214.89	190.572
Kcnt1	Potassium channel, subfamily T, member 1;Potassium channel, subfamily T, member 1;Potassium channel, subfamily T, member 1;Potassium channel, subfamily T, member 1;Potassium channel, subfamily T, member 1;Potassium channel, subfamily T, member 1;Potassium channel subfamily T member 1	A0A0G2JER3_MOUSE;A0A0G2JG99_MOUSE;A2AHB7_MOUSE;A2AHB8_MOUSE;A2AHB9_MOUSE;C0KTP6_MOUSE;KCNT1_MOUSE		NaN	NaN	17.3394	27.6391	11.7111	25.4455	18.6396	17.7973	NaN	14.6834	NaN	NaN	15.4369	8.98003	15.7772	16.1822
Nexn	Nexilin;Nexilin (Fragment);Nexilin alpha;Nexilin	A0A0G2JEX1_MOUSE;A0A0G2JG59_MOUSE;G4W8R2_MOUSE;NEXN_MOUSE		138.506	143.682	81.1892	139.583	95.3528	91.5678	164.422	74.9721	NaN	77.5588	48.5111	69.4044	118.86	162.901	97.3974	114.79
Klhl7	Kelch-like 7;Kelch-like 7;Kelch-like protein 7;Klhl7 protein	A0A0G2JF30_MOUSE;G3UW75_MOUSE;KLHL7_MOUSE;Q8K2Z1_MOUSE		42.5511	79.5958	58.4986	62.2213	76.6556	45.596	55.2697	63.2947	37.7298	52.36	47.8088	47.4107	67.6021	38.6232	74.9751	64.6848
Pde5a	Phosphodiesterase;cGMP-specific 3',5'-cyclic phosphodiesterase	A0A0G2JF67_MOUSE;PDE5A_MOUSE		225.248	239.072	212.745	203.114	271.475	265.07	270.143	273.244	264.544	248.382	260.959	257.853	228.227	247.591	245.706	216.698
Rimbp2	RIMS binding protein 2;RIMS-binding protein 2;Isoform 2 of RIMS-binding protein 2	A0A0G2JFB0_MOUSE;RIMB2_MOUSE;RIMB2_MOUSE		552.412	561.641	539.712	562.892	511.258	516.643	528.889	530.571	492.29	527.23	446.521	444.017	440.881	469.149	466.399	515.854
Tdrkh	Tudor and KH domain containing protein;Tdrkh protein;Tudor and KH domain-containing protein	A0A0G2JFB2_MOUSE;Q6PGG8_MOUSE;TDRKH_MOUSE		101.513	103.857	94.471	104.687	54.1725	66.2937	71.9823	66.8749	94.6333	79.2756	91.5911	93.2434	97.3613	74.8817	56.1382	61.6931
Map4	Microtubule-associated protein (Fragment)	A0A0G2JFH2_MOUSE		107.986	123.146	124.435	116.408	107.896	123.714	129.503	112.839	130.666	99.8628	112.168	83.5339	146.077	144.607	168.227	96.3644
Ap5z1	Adaptor-related protein complex 5, zeta 1 subunit;AP-5 complex subunit zeta-1;C330006K01Rik protein (Fragment)	A0A0G2JFH9_MOUSE;AP5Z1_MOUSE;Q6PFH7_MOUSE		112.845	133.276	139.582	133.655	131.909	126.033	130.13	130.518	127.211	137.432	138.75	124.058	130.667	138.077	164.084	143.412
Ints3	Integrator complex subunit 3	A0A0G2JFJ6_MOUSE;INT3_MOUSE		239.707	222.02	196.033	202.997	192.494	194.908	208.389	199.002	160.179	185.954	160.625	156.374	155.122	175.314	163.8	168.834
Fubp1	Far upstream element (FUSE) binding protein 1 (Fragment)	A0A0G2JFK2_MOUSE		56.6156	97.1443	125.566	117.23	99.145	123.165	129.37	123.233	140.001	104.947	136.987	153.077	147.85	134.271	205.805	175.497
Hnrnpd	Heterogeneous nuclear ribonucleoprotein D (Fragment)	A0A0G2JFL4_MOUSE		447.783	436.985	561.445	487.007	412.946	393.431	525.646	454.02	318.002	261.189	396.242	523.77	523.769	502.62	485.178	482.101
Aldh2	aldehyde dehydrogenase (NAD(+)) (Fragment)	A0A0G2JFQ0_MOUSE		58.9839	90.5754	190.931	158.282	53.0725	NaN	109.227	113.165	192.516	273.781	241.081	292.837	178.415	252.7	544.64	505.761
Kcnq2	Potassium voltage-gated channel, subfamily Q, member 2;Potassium voltage-gated channel, subfamily Q, member 2 (Fragment);Potassium voltage-gated channel, subfamily Q, member 2;Potassium voltage-gated channel, subfamily Q, member 2;Potassium voltage-gated channel, subfamily Q, member 2;Potassium voltage-gated channel, subfamily Q, member 2;Potassium voltage-gated channel, subfamily Q, member 2;Pot…	A0A0G2JFQ2_MOUSE;B7ZBV3_MOUSE;B7ZBV4_MOUSE;B7ZBV6_MOUSE;B7ZBV7_MOUSE;B7ZBV8_MOUSE;B7ZBV9_MOUSE;B7ZBW1_MOUSE;B7ZBW2_MOUSE;F6UC55_MOUSE;Q3UY10_MOUSE;KCNQ2_MOUSE;KCNQ2_MOUSE;KCNQ2_MOUSE;KCNQ2_MOUSE;KCNQ2_MOUSE;KCNQ2_MOUSE		71.6379	NaN	28.5745	36.2908	42.6627	NaN	23.6963	NaN	57.9514	NaN	26.4226	48.0449	48.2257	61.3119	58.8114	86.2801
Nbeal2	Neurobeachin-like 2;Nbeal2 protein;Nbeal2 protein;Neurobeachin-like 2;Neurobeachin-like protein 2;Isoform 2 of Neurobeachin-like protein 2	A0A0G2JFQ4_MOUSE;B2RXS1_MOUSE;B7ZWL5_MOUSE;E9Q9L6_MOUSE;NBEL2_MOUSE;NBEL2_MOUSE		69.6075	64.758	48.0104	63.6666	51.1953	41.494	47.9891	48.3538	45.8446	45.7138	38.3362	41.9631	34.5041	68.0591	63.8141	62.6331
Rufy3	RUN and FYVE domain containing 3;Isoform 2 of Protein RUFY3	A0A0G2JFT8_MOUSE;RUFY3_MOUSE		255.154	311.001	220.013	227.643	165.832	199.734	241.607	208.291	217.596	226.657	189.93	203.546	190.685	205.181	328.205	267.03
Ptbp2	Polypyrimidine tract binding protein 2 (Fragment)	A0A0G2JFV8_MOUSE		NaN	NaN	50.7176	55.1063	51.3824	81.8451	48.5147	46.9656	42.5276	50.0079	39.3786	52.4927	64.8007	51.9915	101.499	128.015
Rprd2	Regulation of nuclear pre-mRNA domain containing 2 (Fragment);Regulation of nuclear pre-mRNA domain-containing protein 2;Isoform 2 of Regulation of nuclear pre-mRNA domain-containing protein 2	A0A0G2JFW6_MOUSE;RPRD2_MOUSE;RPRD2_MOUSE		90.3276	73.4448	63.1281	58.6172	53.2108	57.3057	66.9382	62.7104	50.8885	58.1132	45.7792	53.5342	51.8105	54.8777	49.1722	57.8028
Map4	Microtubule-associated protein (Fragment)	A0A0G2JG35_MOUSE		334.547	224.141	335.452	252.023	434.647	503.575	359.144	373.815	320.549	383.692	287.237	281.706	266.048	310.368	291.58	341.825
Smarcd3	SWI/SNF related, matrix associated, actin dependent regulator of chromatin, subfamily d, member 3;SWI/SNF-related matrix-associated actin-dependent regulator of chromatin subfamily D member 3	A0A0G2JG60_MOUSE;SMRD3_MOUSE		354.641	358.332	334.276	365.909	299.919	289.643	292.923	273.854	258.051	243.686	256.377	268.481	357.669	347.208	444.481	468.829
Ap1ar	Adaptor-related protein complex 1 associated regulatory protein;AP1AR	A0A0G2JG85_MOUSE;E9PYF7_MOUSE		283.954	241.122	268.684	265.461	285.731	308.537	247.372	267.013	205.719	195.703	272.903	259.334	240.454	275.553	199.155	173.179
S100a4	S100 calcium binding protein A4 (Fragment);Protein S100-A4;Protein S100	A0A0G2JGD2_MOUSE;S10A4_MOUSE;Q545V2_MOUSE		NaN	80.7875	19.5801	13.1111	NaN	NaN	24.0126	31.7522	21.0125	NaN	15.7836	21.2445	33.097	27.7656	26.7849	26.1054
Qdpr	Quinoid dihydropteridine reductase;Quinoid dihydropteridine reductase;Dihydropteridine reductase	A0A0G2JGJ1_MOUSE;D3YWR7_MOUSE;DHPR_MOUSE		74.2221	NaN	39.0157	30.5646	45.0525	40.8217	41.8637	30.6864	34.6573	44.5455	49.3228	38.4661	56.6074	52.9762	72.7455	58.7525
Abhd4	Abhydrolase domain containing 4	A0A0G2JGK5_MOUSE		114.281	181.865	NaN	NaN	446.326	446.014	188.432	134.27	89.6171	143.662	96.3648	NaN	NaN	166.673	110.922	157.678
Klhl18	Kelch-like 18;Kelch-like protein 18;MKIAA0795 protein (Fragment)	A0A0G2JGN5_MOUSE;KLH18_MOUSE;Q69ZY9_MOUSE		246.663	161.91	243.919	249.693	241.397	261.669	234.6	228.335	224.626	247.119	254.587	205.454	237.966	230.609	240.478	274.255
Nras	GTPase NRas (Fragment);GTPase NRas;GTPase NRas;GTPase NRas;GTPase NRas	A0A0G2JGP4_MOUSE;RASN_MOUSE;Q3UCX0_MOUSE;Q4FJP3_MOUSE;Q9D091_MOUSE		581.558	456.794	639.089	648.162	591.413	639.241	620.622	641.307	538.326	509.699	818.97	702.039	693.133	793.591	186.541	601.684
Nub1	Negative regulator of ubiquitin-like proteins 1;NEDD8 ultimate buster 1;UBA domain-containing protein	A0A0G2JGQ4_MOUSE;NUB1_MOUSE;Q3UYM1_MOUSE		660.866	684.037	806.679	803.886	758.143	787.105	773.647	802.132	728.434	785.71	814.958	790.35	729.691	758.173	825.737	844.775
Camk2d	Calcium/calmodulin-dependent protein kinase type II subunit delta	A0A0G2JGS4_MOUSE		6690.86	6588.61	6680.83	6577.15	5506.2	5493.61	5720.71	6007.16	786.051	850.274	724.778	696.623	1085.55	1119.82	1137.62	1163.69
F3	Coagulation factor III (Fragment)	A0A0G2JGS5_MOUSE;Q6RFS9_MOUSE		101.257	87.1519	102.496	82.6875	94.6238	130.065	82.2512	114.796	385.524	396.15	169.902	138.42	191.461	141.254	187.922	191.816
Cdkl5	Cyclin-dependent kinase-like 5	A0A0G2JGW6_MOUSE		122.779	104.641	69.4377	69.996	110.192	105.706	84.763	77.3236	83.8823	74.1275	76.8949	63.5942	98.3567	91.8798	70.1126	79.129
Fubp1	Far upstream element (FUSE) binding protein 1	A0A0G2JGW9_MOUSE;Q0P6B2_MOUSE		3801.25	3750.15	3670.27	3534.2	3295.58	3636.2	3423.06	3709.53	3423.28	3528.72	4034.23	3982.1	3913.9	4136.14	4195.37	4056.88
Atp1a3	Sodium/potassium-transporting ATPase subunit alpha;Sodium/potassium-transporting ATPase subunit alpha-3	A0A0G2JGX4_MOUSE;AT1A3_MOUSE		10589.6	10260.3	10766.1	10847.1	8091.99	8157.55	8040.21	8510.42	7954.29	8038.93	9559.71	9382.32	10324.7	10392.9	10387.4	10365.3
Plppr4	Phospholipid phosphatase related 4 (Fragment);Phospholipid phosphatase-related protein type 4	A0A0G2JGY9_MOUSE;PLPR4_MOUSE		89.3873	83.6234	51.3233	62.4059	51.8515	63.6138	52.1107	52.9683	58.9919	61.5135	63.1405	61.1693	75.91	78.3311	89.5427	100.795
Pla2g12a	Phospholipase A2, group XIIA (Fragment);Phospholipase A2, group XIIA;Group XIIA secretory phospholipase A2 (Fragment);Group XIIA secretory phospholipase A2;Isoform 2 of Group XIIA secretory phospholipase A2	A0A0G2JH03_MOUSE;Q6GTY5_MOUSE;Q8BMX2_MOUSE;PG12A_MOUSE;PG12A_MOUSE		38.3853	46.5836	15.7383	31.8439	34.8797	38.1438	38.7102	43.6594	25.2708	40.9851	40.1802	30.6926	40.5798	49.6994	54.6142	NaN
Ttll7	Tubulin tyrosine ligase-like family, member 7;Tubulin polyglutamylase TTLL7;Tubulin tyrosine ligase-like family, member 7	A0A0G2LB90_MOUSE;TTLL7_MOUSE;E9Q6C6_MOUSE		83.222	89.2693	82.7818	79.8359	92.2216	84.1756	82.0998	83.0476	47.938	55.7144	46.3244	46.1337	54.7683	61.4969	58.2716	64.7093
Usp33	Ubiquitin carboxyl-terminal hydrolase;Ubiquitin carboxyl-terminal hydrolase 33;Isoform 2 of Ubiquitin carboxyl-terminal hydrolase 33	A0A0H2UKB8_MOUSE;UBP33_MOUSE;UBP33_MOUSE		95.1017	75.1894	58.9417	67.7981	67.1581	57.4883	56.8089	61.0646	79.7638	75.592	60.4093	70.1443	56.0073	58.8258	52.3393	57.9478
Ckm	Creatine kinase M-type	A0A0J9YKD4_MOUSE;A2RTA0_MOUSE;KCRM_MOUSE		11262.8	9514.8	9215.33	9311.94	8765.19	8312.93	8447.49	9205.46	12384.3	10572.1	9007.68	8127.99	9595.61	9574.09	9359.87	9020.56
Rnf187	Ring finger protein 187;E3 ubiquitin-protein ligase RNF187	A0A0J9YQM4_MOUSE;RN187_MOUSE		232.805	212.857	191.566	195.742	246.833	232.915	223.015	226.839	221.04	198.669	243.752	239.508	192.141	204.902	209.188	196.742
Ncbp2as2	Ncbp2 antisense 2 (head to head)	A0A0J9YTR2_MOUSE		142.027	199.262	115.187	102.765	97.7145	106.02	83.2976	110.467	136.649	175.287	140.273	115.37	83.7313	107.437	NaN	NaN
Rgs6	Regulator of G-protein signaling 6 (Fragment)	A0A0J9YTS6_MOUSE		151.395	140.942	13.2243	33.0959	114.226	49.8146	58.8904	63.2678	79.8619	83.8757	86.2613	60.1264	43.9977	38.3113	46.1413	27.0823
Specc1	Sperm antigen with calponin homology and coiled-coil domains 1;Cytospin-B	A0A0J9YTU3_MOUSE;CYTSB_MOUSE		194.654	195.948	167.109	166.152	188.357	188.392	174.044	182.2	134.241	142.333	116.654	123.249	153.086	152.498	151.237	157.401
Rbpj	Recombination signal binding protein for immunoglobulin kappa J region;Recombination signal binding protein for immunoglobulin kappa J region;Recombining binding protein suppressor of hairless;Isoform 2 of Recombining binding protein suppressor of hairless;Recombination signal binding protein for immunoglobulin kappa J region;Recombining binding protein suppressor of hairless	A0A0J9YTV5_MOUSE;E9Q7W0_MOUSE;SUH_MOUSE;SUH_MOUSE;Q3U6F1_MOUSE;Q3UM17_MOUSE		81.8404	60.525	80.4418	48.2562	40.2355	59.7859	46.1492	62.0054	50.7245	48.6857	68.2417	64.792	53.8566	62.5257	41.0159	34.1396
Tcf4	Transcription factor 4;Transcription factor 4;Transcription factor 4;Transcription factor 4;Transcription factor 4;Isoform 3 of Transcription factor 4;Transcription factor 4	A0A0J9YTW1_MOUSE;A0A0J9YUG4_MOUSE;A0A0J9YUK1_MOUSE;A0A0J9YUP9_MOUSE;A0A0J9YVG2_MOUSE;ITF2_MOUSE;Q8CE98_MOUSE		127.292	67.5219	119.978	80.3411	46.9923	103.675	98.0407	98.4895	163.855	143.627	131.407	128.284	57.1067	113.512	128.415	166.424
Ctbp1	C-terminal binding protein 1 (Fragment)	A0A0J9YTW3_MOUSE		NaN	NaN	NaN	NaN	NaN	NaN	NaN	NaN	92.6801	114.553	NaN	34.3303	80.0215	78.9538	NaN	NaN
Crmp1	Collapsin response mediator protein 1 (Fragment)	A0A0J9YTX5_MOUSE		1075.89	1233.43	1447.51	1574.26	1368.82	1094.14	1578.31	1520.53	1026.09	1101.9	1494.54	1383.27	1933.7	1860.76	1527.72	1377.36
Nsg1	Neuronal vesicle trafficking-associated protein 1	A0A0J9YTZ4_MOUSE;NSG1_MOUSE;Q8C5M2_MOUSE		160.806	121.939	139.346	126.137	217.956	145.079	92.2804	84.5509	85.545	109.171	84.2694	83.2208	119.475	63.9106	81.8655	50.0135
Clock	Circadian locomoter output cycles protein kaput;Circadian locomoter output cycles protein kaput;Isoform Short of Circadian locomoter output cycles protein kaput;Circadian locomoter output cycles protein kaput (Fragment)	A0A0J9YU61_MOUSE;CLOCK_MOUSE;CLOCK_MOUSE;Q6ZQD6_MOUSE		61.5897	51.389	63.1863	54.5555	88.3547	105.236	63.3099	61.8877	47.2016	63.1399	47.2782	37.4152	51.8838	58.7975	42.358	108.538
Ctbp1	C-terminal binding protein 1	A0A0J9YU62_MOUSE		159.937	210.576	68.5803	89.4648	66.4724	58.4469	44.9	NaN	57.209	44.3174	55.705	81.6404	63.8539	73.8357	41.1291	79.2216
Slc10a4	Solute carrier family 10 (sodium/bile acid cotransporter family), member 4;Solute carrier family 10 (Sodium/bile acid cotransporter family), member 4;Sodium/bile acid cotransporter 4	A0A0J9YU87_MOUSE;A2RTJ6_MOUSE;NTCP4_MOUSE		160.473	168.883	167.146	171.768	53.356	53.6394	52.9715	53.5366	37.8809	48.7541	49.5735	58.2675	142.477	152.75	214.518	163.421
Med13l	Mediator of RNA polymerase II transcription subunit 13;Mediator of RNA polymerase II transcription subunit 13;Mediator of RNA polymerase II transcription subunit 13 (Fragment);Mediator of RNA polymerase II transcription subunit 13-like	A0A0J9YUA8_MOUSE;E9QLJ3_MOUSE;Q6GQS5_MOUSE;MD13L_MOUSE		62.9989	44.3817	66.5037	54.7795	37.0818	50.7534	47.9806	53.3581	66.8351	61.2763	46.2652	39.5691	47.2822	NaN	54.6859	65.2911
Specc1	Sperm antigen with calponin homology and coiled-coil domains 1	A0A0J9YUF8_MOUSE		165.244	172.082	80.038	166.674	121.02	130.737	160.604	173.715	NaN	70.3822	154.328	82.6331	145.414	NaN	170.025	128.894
Septin11	Septin	A0A0J9YUL3_MOUSE		510.264	661.282	416.475	485.329	287.259	276.815	270.395	300.463	524.686	566.12	419.857	521.977	285.743	417.004	534.09	582.502
Syngap1	Synaptic Ras GTPase activating protein 1 homolog (rat)	A0A0J9YUM2_MOUSE		62.2203	51.2055	53.6572	52.2924	62.0081	59.1956	70.9548	76.845	58.5286	NaN	41.7688	36.9982	35.5155	32.1935	80.8003	87.8328
Ube2a	Ubiquitin-conjugating enzyme E2A;Ubiquitin-conjugating enzyme E2A (Fragment);Ubiquitin-conjugating enzyme E2A;UBC core domain-containing protein;UBC core domain-containing protein;Ubiquitin-conjugating enzyme E2 A	A0A0J9YUN2_MOUSE;A0A0J9YUW6_MOUSE;A0A8Q0LUK5_MOUSE;Q3TUV9_MOUSE;Q3UCS1_MOUSE;UBE2A_MOUSE		171.987	146.115	169.532	168.924	243.476	282.95	279.203	290.637	126.944	121.974	221.907	224.33	282.98	213.648	98.3642	128.133
Dnm1	dynamin GTPase	A0A0J9YUN4_MOUSE		69062.4	70582.4	68325.4	68611.5	77296.7	74854.5	77463.8	79900.5	68432.1	65985.4	77917	77153.4	66568.6	66533.2	63392.6	63852
Fry	FRY microtubule binding protein (Fragment);Cell morphogenesis protein N-terminal domain-containing protein	A0A0J9YUP4_MOUSE;Q3TZB0_MOUSE		144.698	136.007	126.148	122.702	90.2571	135.678	100.755	120.182	111.148	92.2388	76.4339	83.4613	104.774	91.6328	110.786	122.251
Gsn	Gelsolin (Fragment)	A0A0J9YUQ8_MOUSE		273.084	253.425	254.894	232.398	242.369	415.042	336.122	289.641	334.753	319.813	255.691	219.773	353.919	441.217	429.645	520.595
Dnm1	Dynamin 1 (Fragment)	A0A0J9YUS0_MOUSE		725.564	689.799	743.379	881.591	679.125	751.089	860.49	825.5	1362.68	1613.9	873.605	737.859	726.305	710.13	905.043	913.903
Scn8a	Sodium channel protein;Sodium channel protein;Sodium channel protein;Sodium channel protein;Sodium channel protein;Sodium channel protein type 8 subunit alpha;Isoform 3 of Sodium channel protein type 8 subunit alpha;Isoform 5 of Sodium channel protein type 8 subunit alpha	A0A0J9YUW5_MOUSE;A0A0R5RP22_MOUSE;F6U329_MOUSE;F7D6J5_MOUSE;F7D6K4_MOUSE;SCN8A_MOUSE;SCN8A_MOUSE;SCN8A_MOUSE		189.55	170.211	71.5478	104.86	90.7859	103.375	81.7313	90.214	127.756	127.657	124.276	117.9	142.966	161.46	114.581	107.034
Hmgb1	High mobility group protein B1 (Fragment)	A0A0J9YUZ4_MOUSE		287.676	272.572	179.28	178.387	447.226	505.303	246.654	219.634	384.53	340.88	535.898	579.897	332.083	313.311	240.08	301.918
Zeb2	Zinc finger E-box binding homeobox 2;Zinc finger E-box binding homeobox 2;Zinc finger E-box binding homeobox 2;C2H2-type domain-containing protein;MKIAA0569 protein (Fragment);Zinc finger E-box-binding homeobox 2	A0A0J9YV01_MOUSE;A0A0M3HEP2_MOUSE;H9H9S3_MOUSE;Q3URW5_MOUSE;Q80TX6_MOUSE;ZEB2_MOUSE		293.442	297.068	270.117	278.545	363.501	316.468	306.817	309.205	167.179	171.438	193.438	176.887	181.919	217.532	206.552	199.122
Slbp	Stem-loop binding protein;Histone RNA hairpin-binding protein;Histone RNA hairpin-binding protein RNA-binding domain-containing protein;Histone RNA hairpin-binding protein RNA-binding domain-containing protein;Stem-loop binding protein;Slbp protein	A0A0J9YV40_MOUSE;SLBP_MOUSE;Q3TSD8_MOUSE;Q3U4T7_MOUSE;Q3V2L1_MOUSE;Q8K2W7_MOUSE		27.2769	32.5706	30.5494	39.7375	42.1853	46.7771	38.7793	27.8792	35.459	20.2915	34.5799	26.0122	15.0456	20.4541	52.2163	57.6727
Pdgfra	Platelet-derived growth factor receptor-like protein (Fragment)	A0A0J9YVF3_MOUSE		190.74	191.96	61.6422	87.4099	131.742	133.415	60.1519	109.786	54.8218	84.324	44.0379	98.0897	NaN	94.323	NaN	NaN
Grep1	Glycine rich extracellular protein 1	A0A0J9YVH6_MOUSE		NaN	NaN	50.9216	60.2854	NaN	49.1754	79.9817	76.8479	91.5922	107.965	75.8318	110.928	67.6156	55.3455	NaN	NaN
Syngap1	Synaptic Ras GTPase activating protein 1 homolog (rat) (Fragment)	A0A0J9YVH8_MOUSE		111.916	91.0347	81.5766	120.615	56.4926	70.2954	68.1969	83.2512	41.6773	31.6892	29.5583	43.1291	22.9741	40.9013	56.7428	72.18
Nfu1	NFU1 iron-sulfur cluster scaffold homolog, mitochondrial;NFU1 iron-sulfur cluster scaffold homolog, mitochondrial	A0A0N4SUH8_MOUSE;NFU1_MOUSE		2366.34	2376.57	3030.91	2700.06	1483.56	1698.19	1802.95	1730.72	2858.89	2749.7	2766.79	3037.68	2483.53	2038.91	2579.06	2524.48
Naaladl2	N-acetylated alpha-linked acidic dipeptidase-like 2	A0A0N4SUJ3_MOUSE		31.6126	20.0518	14.3177	40.3611	NaN	NaN	17.45	NaN	34.8311	27.9232	NaN	32.7732	NaN	27.7156	28.2802	35.0535
Lpcat3	Lysophosphatidylcholine acyltransferase 3;Lysophospholipid acyltransferase 5	A0A0N4SUM3_MOUSE;MBOA5_MOUSE		83.8197	124.875	85.557	108.617	96.781	140.737	69.7308	82.6394	81.7251	112.63	91.6696	60.834	110.671	83.377	220.361	230.899
Magi1	Membrane associated guanylate kinase, WW and PDZ domain containing 1	A0A0N4SUZ0_MOUSE		1249.53	1255.72	1312.86	1332.82	1272.54	1268.56	1249.9	1280.51	1179.2	1121.34	1310.76	1343.84	1084.35	1132.47	1293.31	1281.15
Asb3	Ankyrin repeat and SOCS box-containing 3;Ankyrin repeat and SOCS box-containing 3;Ankyrin repeat and SOCS box protein 3	A0A0N4SV07_MOUSE;Q8R5B4_MOUSE;ASB3_MOUSE		297.321	317.155	296.417	286.058	288.231	287.33	280.719	303.684	232.668	221.558	251.33	237.81	258.477	252.434	281.865	272.586
Etnk1	ethanolamine kinase;ethanolamine kinase;Ethanolamine kinase 1	A0A0N4SV10_MOUSE;A0A0N4SVC4_MOUSE;EKI1_MOUSE		421.489	446.621	388.217	371.148	425.269	409.948	356.732	360.08	388.936	375.379	362.891	379.574	388.822	386.153	439.681	401.051
H2aj;H2ac12;H2ac25;H2ac12;Hist1h2ad;Hist2h2aa1;H2ac4;H2ac6;H2ac7;H2ac8;H2ac11;H2ac13;Hist1h2an;Hist1h2ao;Hist1h2ap;H2ac20;H2A;H2ac20;Hist2h2aa1;H2ac25;H2ac1;Hist1h2af;H2ac12;H2ac15;H2aj	Histone H2A;Histone H2A (Fragment);Histone H2A;Histone H2A;Histone H2A;Histone H2A;Histone H2A type 1-B;Histone H2A type 1-C;Histone H2A type 1-D;Histone H2A type 1-E;Histone H2A type 1-G;Histone H2A type 1-I;Histone H2A type 1-N;Histone H2A type 1-O;Histone H2A type 1-P;Histone H2A;Histone H2A (Fragment);Histone H2A type 2-C;Histone H2A type 2-A;Histone H2A type 3;Histone H2A;Histone H2A type 1-…	A0A0N4SV66_MOUSE;A0AUV1_MOUSE;A2AB79_MOUSE;A3KPD0_MOUSE;B2RVF0_MOUSE;B2RWH3_MOUSE;H2A1B_MOUSE;H2A1C_MOUSE;H2A1D_MOUSE;H2A1E_MOUSE;H2A1G_MOUSE;H2A1I_MOUSE;H2A1N_MOUSE;H2A1O_MOUSE;H2A1P_MOUSE;Q149V4_MOUSE;Q64426_MOUSE;H2A2C_MOUSE;H2A2A_MOUSE;H2A3_MOUSE;Q8CGP4_MOUSE;H2A1F_MOUSE;H2A1H_MOUSE;H2A1K_MOUSE;H2AJ_MOUSE		3159.85	2053.66	748.94	715.937	775.234	737.559	539.541	518.375	2261.54	2074.29	1347.28	1511.04	926.06	1039.1	1077.35	1174.59
Syt17	Synaptotagmin XVII	A0A0N4SV78_MOUSE		118.089	153.388	96.5642	78.6344	44.6082	39.103	73.2077	60.7021	74.3372	113.775	46.742	NaN	81.7493	62.6646	92.7092	72.3637
Mitf	Melanogenesis associated transcription factor;Melanogenesis associated transcription factor;Melanogenesis associated transcription factor;Mitf protein;Microphthalmia-associated transcription factor;Isoform A1 of Microphthalmia-associated transcription factor;Isoform H of Microphthalmia-associated transcription factor;Isoform H1 of Microphthalmia-associated transcription factor;Isoform H3 of Micro…	A0A0N4SV79_MOUSE;A0A5H1ZRM6_MOUSE;E9PZ28_MOUSE;I6L9I6_MOUSE;MITF_MOUSE;MITF_MOUSE;MITF_MOUSE;MITF_MOUSE;MITF_MOUSE;MITF_MOUSE;MITF_MOUSE;Q32MU7_MOUSE		NaN	85.1033	58.6867	54.8801	60.5768	77.8781	59.9169	50.2745	63.2464	61.0012	68.9755	88.4439	38.9307	73.7461	NaN	NaN
Zfp638;Zfp638;Znf638;Znf638	Zinc finger protein 638;Zinc finger protein 638;Zinc finger protein 638;Isoform 4 of Zinc finger protein 638	A0A0N4SV80_MOUSE;E9QML5_MOUSE;ZN638_MOUSE;ZN638_MOUSE		46.9986	52.5622	39.1534	38.3078	33.4104	41.4912	37.9919	32.2236	37.6172	39.4223	38.3065	37.7246	43.3769	41.5009	48.9484	58.7273
Prrt3	Proline-rich transmembrane protein 3	A0A0N4SVB5_MOUSE;PRRT3_MOUSE		521.757	546.275	440.48	375.846	318.171	391.372	377.711	386.759	564.884	530.903	511.983	549.874	479.804	490.849	424.022	470.358
Rasgef1a	RasGEF domain family, member 1A;RasGEF domain family, member 1A;RasGEF domain family, member 1A;Rasgef1a protein	A0A0N4SVF2_MOUSE;A0A0N4SVR5_MOUSE;A6H650_MOUSE;B7ZNG9_MOUSE		3220.25	4672.48	3699.61	3675.16	3743.16	3478.41	2536.67	2782.8	5339.88	4192.36	3506.26	3883.06	3796	4060.34	4425.13	4650.59
Vopp1	WW domain binding protein VOPP1;WW domain binding protein VOPP1;Isoform 2 of WW domain binding protein VOPP1	A0A0N4SVF9_MOUSE;VOPP1_MOUSE;VOPP1_MOUSE		4.57455	NaN	NaN	3.93056	NaN	NaN	7.42201	NaN	8.97759	NaN	4.97524	8.72565	2.69193	NaN	4.48319	10.4774
Eif4g3	Eukaryotic translation initiation factor 4 gamma, 3	A0A0N4SVL0_MOUSE		667.769	698.789	568.151	569.659	853.539	905.225	787.321	786.531	852.605	857.098	780.754	753.471	700.31	710.342	615.761	597.641
Ndufa4	Ndufa4, mitochondrial complex associated;Cytochrome c oxidase subunit NDUFA4	A0A0N4SVQ1_MOUSE;NDUA4_MOUSE		1181.02	1148.96	952.177	942.302	524.956	480.076	437.314	444.773	294.424	269.581	246.527	280.929	1302.9	1175.17	797.586	874.023
Ergic2	Endoplasmic reticulum-Golgi intermediate compartment protein (Fragment);Endoplasmic reticulum-Golgi intermediate compartment protein 2	A0A0N4SVQ6_MOUSE;ERGI2_MOUSE		69.352	93.8474	94.6729	86.7561	55.1895	43.2964	56.258	69.6189	93.6428	104.114	85.9917	NaN	88.4643	62.1443	97.9889	110.65
Cnbp	CCHC-type zinc finger nucleic acid binding protein	A0A0N4SVS6_MOUSE		160.193	133.858	162.904	122.574	161.505	110.909	78.3731	58.2222	76.4345	69.3601	86.7917	66.9554	35.3234	44.2747	134.941	96.5206
Gng12	Guanine nucleotide-binding protein subunit gamma (Fragment)	A0A0N4SVT3_MOUSE		1699.53	1717.27	1554.32	1601.24	1220.21	1158.75	1219.48	1287.92	1568.28	1627.62	1531.83	1488.69	1598.95	1706.71	1615.09	1576.27
Dnajb8	DnaJ heat shock protein family (Hsp40) member B8 (Fragment)	A0A0N4SVT8_MOUSE		73.9105	72.5682	57.359	78.3714	67.9462	71.9977	70.5803	68.5465	34.6518	79.6497	104.663	57.423	98.7109	71.5639	68.982	73.799
Gm45140;Rab43;Rab43;Rab43	Predicted gene 45140 (Fragment);Rab41;Ras-related protein Rab-43;RAB43, member RAS oncogene family	A0A0N4SW17_MOUSE;Q0PD10_MOUSE;RAB43_MOUSE;Q91Z34_MOUSE		80.9106	NaN	61.9528	76.208	NaN	122.07	63.2468	96.1026	101.515	70.8958	102.055	70.1559	83.9347	NaN	87.2936	88.2719
Tmem168	Transmembrane protein 168	A0A0N4SW50_MOUSE;TM168_MOUSE		128.884	NaN	111.461	76.6942	92.552	69.8472	96.8399	83.2686	83.7442	101.579	77.4087	93.0614	67.9709	96.8672	124.043	179.446
Rab11fip5	RAB11 family interacting protein 5 (class I)	A0A0N4SW73_MOUSE		496.246	445.139	411.417	418.677	430.245	454.014	421.273	437.368	648.466	621.303	573.513	591.166	616.732	615.446	598.059	608.954
C2cd5	C2 calcium-dependent domain containing 5	A0A0N4SW93_MOUSE		214.836	204.059	161.29	184.826	189.358	184.709	197.582	207.05	159.56	151.624	176.931	167.119	198.331	182.365	198.069	198.937
Atp6v1e1	ATPase, H+ transporting, lysosomal V1 subunit E1 (Fragment)	A0A0N4SWA3_MOUSE		NaN	230.934	126.308	149.24	264.188	285.173	188.675	198.071	251.764	254.663	149.813	188.401	285.644	256.239	165.909	144.833
Tmcc1	Transmembrane and coiled coil domains 1;Transmembrane and coiled coil domains 1 (Fragment);Transmembrane and coiled-coil domains protein 1;Isoform 2 of Transmembrane and coiled-coil domains protein 1;Tmcc1 protein (Fragment)	A0A0N4SWB9_MOUSE;F8WJ98_MOUSE;TMCC1_MOUSE;TMCC1_MOUSE;Q8K2V2_MOUSE		104.35	101.133	69.2405	60.1807	60.7911	69.5349	59.988	57.5629	95.6962	94.9387	61.9489	69.5816	65.0114	65.6717	74.6439	58.881
Magi1	Membrane associated guanylate kinase, WW and PDZ domain containing 1	A0A0N4SWH0_MOUSE		93.6559	99.9908	149.703	134.939	96.7237	98.677	135.234	130.658	110.26	93.6919	94.7492	140.295	110.723	92.0299	216.996	157.93
Rfc1	Replication factor C subunit 1;Replication factor C subunit 1;Replication factor C subunit 1;Replication factor C subunit 1;Isoform 2 of Replication factor C subunit 1;Replication factor C subunit 1	A0A0N5E9G7_MOUSE;G3UWX1_MOUSE;G3X8Z6_MOUSE;RFC1_MOUSE;RFC1_MOUSE;Q5U4B1_MOUSE		NaN	NaN	27.9975	23.884	8.70605	18.6446	18.8073	27.1189	23.6979	19.8364	29.8082	22.4741	13.3178	17.8554	19.0675	13.8662
Ndufa9	NADH dehydrogenase [ubiquinone] 1 alpha subcomplex subunit 9, mitochondrial;NADH dehydrogenase [ubiquinone] 1 alpha subcomplex subunit 9, mitochondrial	A0A0R3P9C8_MOUSE;NDUA9_MOUSE		202.523	206.672	97.2604	90.2163	85.0551	100.25	75.0127	73.0865	85.1614	88.4429	62.5279	51.4468	147.664	160.892	151.229	160.277
Repin1	Replication initiator 1	A0A0R3P9D3_MOUSE;D3YY67_MOUSE;REPI1_MOUSE		33.6859	45.9424	47.2966	59.1849	43.1856	80.1123	27.8904	49.2174	68.5204	54.1176	68.7511	38.0099	48.2666	43.1557	16.8288	NaN
Def8	Differentially expressed in FDCP 8	A0A0R4IZW6_MOUSE;G3X9U5_MOUSE;DEFI8_MOUSE		78.0385	77.8984	63.407	66.6304	70.8347	95.6414	76.1411	67.7216	51.8008	61.8225	50.3442	53.034	75.4925	83.5608	79.4658	62.1591
Trmt1	tRNA (guanine(26)-N(2))-dimethyltransferase	A0A0R4IZW7_MOUSE;E9PWD4_MOUSE;H3BKS8_MOUSE		742.149	666.896	730.207	812.051	738.96	707.754	731.247	786.199	852.443	741.93	743.132	766.269	646.653	599.103	677.059	691.625
Sdf2	Stromal cell derived factor 2;Sdf2 protein;Stromal cell derived factor 2;Stromal cell-derived factor 2	A0A0R4IZW9_MOUSE;Q5I0W5_MOUSE;Q6P5I1_MOUSE;SDF2_MOUSE		90.2461	132.532	98.5563	61.5993	125.027	93.084	63.4154	66.3354	72.7838	64.2896	60.8997	67.2789	82.8647	62.2278	84.5853	NaN
Nherf2	Na(+)/H(+) exchange regulatory cofactor NHE-RF;Na(+)/H(+) exchange regulatory cofactor NHE-RF;Na(+)/H(+) exchange regulatory cofactor NHE-RF2	A0A0R4IZX2_MOUSE;Q6NS54_MOUSE;NHRF2_MOUSE		158.93	157.995	123.126	120.915	111.847	131.021	106.123	118.89	123.319	134.44	151.505	144.604	115.002	123.49	144.219	168.011
Ncan	Neurocan;Neurocan core protein	A0A0R4IZX5_MOUSE;NCAN_MOUSE		1494.06	1563.78	1610.49	1585.36	1864.7	1841.6	1840.48	1830.93	1316.08	1359.99	1460.69	1398.79	1617.92	1554.62	1956.29	1916.19
Ap1m2	AP-1 complex subunit mu-2;AP-1 complex subunit mu-2;AP-1 complex subunit mu-2;Isoform 2 of AP-1 complex subunit mu-2	A0A0R4IZX6_MOUSE;A0A0R4J1L4_MOUSE;AP1M2_MOUSE;AP1M2_MOUSE		NaN	NaN	NaN	41.1906	28.8942	37.5174	57.186	NaN	NaN	NaN	NaN	62.8446	48.604	NaN	42.6343	43.2741
Thop1	Thimet oligopeptidase	A0A0R4IZY0_MOUSE;THOP1_MOUSE		121.313	105.407	116.857	111.159	151.49	168.555	145.517	147.452	171.632	164.751	152.038	132.588	160.882	155.956	168.052	185.115
Dtx2	E3 ubiquitin-protein ligase;Probable E3 ubiquitin-protein ligase DTX2	A0A0R4IZY1_MOUSE;DTX2_MOUSE		85.341	78.9984	72.3719	70.0665	62.0437	49.3574	74.6916	80.9613	63.5436	50.0781	86.4692	81.3051	67.2583	63.9404	62.7401	67.554
Dus3l	tRNA-dihydrouridine(47) synthase [NAD(P)(+)]	A0A0R4IZY9_MOUSE		773.035	843.394	834.941	893.35	1025.7	1019.88	1002.67	993.318	865.921	919.697	968.487	1013.78	864.505	899.475	895.888	830.73
Fnbp4	Formin binding protein 4;Formin binding protein 4;Formin-binding protein 4	A0A0R4IZZ6_MOUSE;A0A5F8MPU2_MOUSE;FNBP4_MOUSE		151.355	181.046	123.17	133.877	192.251	177.332	167.283	147.389	165.032	167.787	160.053	171.612	160.468	152.918	164.621	156.679
Kctd5	Potassium channel tetramerisation domain containing 5;BTB/POZ domain-containing protein KCTD5	A0A0R4J000_MOUSE;KCTD5_MOUSE		282.834	313.72	333.196	310.415	242.906	271.626	239.324	258.372	209.944	209.692	285.976	286.051	203.46	252.429	207.244	224.686
Lims1	LIM and senescent cell antigen-like-containing domain protein	A0A0R4J005_MOUSE		526.285	472.105	535.496	539.593	568.704	544.578	563.991	579.952	467.119	483.308	541.761	504.752	575.528	583.529	444.591	474.657
Pald1	Paladin	A0A0R4J007_MOUSE;B2RQ13_MOUSE;PALD_MOUSE		127.605	127.979	106.925	105.075	102.364	115.436	106.782	107.782	121.304	133.585	119.9	114.213	142.296	139.09	124.089	124.928
Hdac2	Histone deacetylase 2	A0A0R4J008_MOUSE;HDAC2_MOUSE		2792.88	2874.17	2403.4	2396.66	2567.27	2717.37	2639.46	2567.52	2590.07	2537.31	2467.68	2482.5	2700.72	2733.71	2708.99	2474.59
Actr6	ARP6 actin-related protein 6;Actin-related protein 6	A0A0R4J009_MOUSE;ARP6_MOUSE		NaN	117.179	53.3122	55.7817	36.7248	31.0448	NaN	35.5983	49.8661	45.3548	41.8438	32.6982	43.3545	52.5023	52.0599	49.6571
Lratd1	LRAT domain containing 1;Protein LRATD1	A0A0R4J012_MOUSE;LRAT1_MOUSE		92.3831	87.2844	76.5443	71.7269	80.8512	74.7573	72.3238	75.1022	62.7101	57.5416	58.3605	64.5475	66.6024	56.8116	79.6666	99.2506
Dus4l	tRNA-dihydrouridine synthase	A0A0R4J016_MOUSE		109.408	116.577	94.6101	68.2246	119.908	121.29	80.7279	76.974	74.9139	131.007	90.2188	103.401	82.5432	85.2863	148.707	127.281
Tshz3	Teashirt zinc finger family member 3	A0A0R4J017_MOUSE		19.7443	19.4506	14.9127	26.1741	20.927	8.38245	16.4225	8.72146	19.5629	19.6121	16.1794	17.5398	6.65069	8.99968	11.2572	12.514
Auh	AU RNA binding protein/enoyl-coenzyme A hydratase;Methylglutaconyl-CoA hydratase, mitochondrial	A0A0R4J023_MOUSE;AUHM_MOUSE		1705.03	2745.39	1914.22	1800.17	1711.55	1975.41	1631.89	1843.21	1864.91	2057.99	2692.39	2540.73	1918.47	1778.06	2232.08	2363.5
Xrcc4	X-ray repair complementing defective repair in Chinese hamster cells 4;DNA repair protein XRCC4	A0A0R4J024_MOUSE;XRCC4_MOUSE		74.0406	95.6319	85.7821	91.6033	94.5413	84.2937	73.1275	80.687	72.9413	71.3903	70.6076	66.5781	75.048	76.9683	91.4218	63.0125
Rcbtb1	Regulator of chromosome condensation (RCC1) and BTB (POZ) domain containing protein 1;BTB domain-containing protein	A0A0R4J025_MOUSE;Q8BTL0_MOUSE		310.236	287.133	312.616	323.245	359.098	339.257	315.618	335.594	329.379	336.878	331.343	370.016	385.274	384.66	419.734	419.79
Atg10	Ubiquitin-like-conjugating enzyme ATG10	A0A0R4J029_MOUSE;ATG10_MOUSE		130.278	124.546	89.8697	115.853	145.875	114.522	105.382	89.0724	115.16	100.368	117.553	134.704	127.281	117.772	173.381	186.907
Amer2	APC membrane recruitment protein 2	A0A0R4J030_MOUSE		677.675	658.826	674.094	680.356	713.444	632.538	656.523	644.558	621.451	718.557	715.79	716.109	699.379	708.08	841.16	802.757
Trim35	Tripartite motif-containing 35;E3 ubiquitin-protein ligase TRIM35	A0A0R4J031_MOUSE;TRI35_MOUSE		41.6518	30.0373	53.2322	47.656	50.4757	18.6863	35.1439	18.5458	43.2746	62.2878	NaN	29.9814	41.2462	41.5514	53.2097	54.478
Pdxdc1	Pyridoxal-dependent decarboxylase domain containing 1;Isoform 2 of Pyridoxal-dependent decarboxylase domain-containing protein 1	A0A0R4J034_MOUSE;PDXD1_MOUSE		208.794	237.933	165.03	200.947	268.753	171.838	174.406	209.386	231.178	248.531	212.691	265.528	315.506	212.828	256.844	207.331
Nefm	Neurofilament medium polypeptide	A0A0R4J036_MOUSE;NFM_MOUSE		500.689	505.698	455.124	447.336	553.442	565.652	484.603	482.052	350.299	342.927	340.661	371.756	510.074	481.957	476.564	475.576
Kng1	Kininogen 1;Kininogen 1;Kininogen-1;Isoform LMW of Kininogen-1;Isoform 3 of Kininogen-1	A0A0R4J038_MOUSE;D3YTY9_MOUSE;KNG1_MOUSE;KNG1_MOUSE;KNG1_MOUSE		NaN	NaN	NaN	NaN	NaN	NaN	NaN	NaN	NaN	11.8535	33.8932	NaN	57.8108	44.5036	49.0707	45.1822
Bfar	Bifunctional apoptosis regulator	A0A0R4J040_MOUSE;BFAR_MOUSE		81.6814	63.8604	97.091	76.1503	53.4977	46.7072	54.7446	47.1002	35.5451	59.2228	88.228	82.8551	58.3415	47.58	39.1682	55.7539
Mettl3	mRNA m(6)A methyltransferase	A0A0R4J041_MOUSE		184.41	176.525	177.284	178.191	157.663	169.97	167.783	181.193	155.765	172.384	160.586	159.335	169.241	164.589	219.064	244.876
Pcbp4	Poly(rC) binding protein 4;Poly(rC)-binding protein 4	A0A0R4J044_MOUSE;PCBP4_MOUSE		124.834	137.513	123.253	116.277	120.544	128.539	119.343	127.192	122.687	137.091	153.36	147.159	134.564	133.523	215.281	196.394
Prmt5	Protein arginine N-methyltransferase 5	A0A0R4J049_MOUSE		4693.66	4857.99	5031.08	5088.33	5392.94	5308.05	5019.81	5099.22	4975.75	4797.36	5610.9	5481.24	5503.32	5511.17	4830.02	5137.28
Acy1	N-acyl-aliphatic-L-amino acid amidohydrolase	A0A0R4J050_MOUSE		3855.86	3784.77	3993.01	3910.12	3623.59	3583.85	3892.61	4056.75	3412.2	3367.44	3722.98	3766.3	4463.75	4269.68	5321.5	5398.87
Atg4b	Cysteine protease	A0A0R4J065_MOUSE		684.998	619.848	568.419	594.879	620.357	642.289	549.648	573.816	632.733	624.549	547.061	538.305	640.683	642.257	608.996	637.623
Ubxn4	UBX domain-containing protein 4	A0A0R4J078_MOUSE		454.013	407.473	387.295	418.287	266.902	289.705	298.053	294.292	455.448	510.317	405.793	366.168	366.867	363.436	444.436	432.507
Acbd3	Acyl-Coenzyme A binding domain containing 3;Golgi resident protein GCP60	A0A0R4J079_MOUSE;GCP60_MOUSE		450.103	440.134	454.198	443.611	323.27	404.425	365.549	389.726	465.09	489.96	456.527	457.061	409.118	409.621	586.351	529.355
Ndufaf1	Complex I intermediate-associated protein 30, mitochondrial;Complex I intermediate-associated protein 30, mitochondrial;Complex I intermediate-associated protein 30, mitochondrial	A0A0R4J081_MOUSE;A2AQ17_MOUSE;CIA30_MOUSE		95.8977	124.59	87.9813	92.8121	89.6228	97.0133	65.501	76.9908	120.303	90.4874	96.0419	120.98	84.6476	96.2741	144.03	126.018
Acadl	Long-chain specific acyl-CoA dehydrogenase, mitochondrial	A0A0R4J083_MOUSE		1192.15	1208.7	1244.88	1244.52	1514.34	1570.59	1427.03	1420.7	1804.33	1780.97	1802.72	1816.83	1629.07	1610.66	1513.83	1553.97
Uap1	UDP-N-acetylglucosamine pyrophosphorylase 1;UDP-N-acetylglucosamine pyrophosphorylase 1;UDP-N-acetylhexosamine pyrophosphorylase;UDP-N-acetylglucosamine pyrophosphorylase 1;UDP-N-acetylhexosamine pyrophosphorylase;Isoform AGX1 of UDP-N-acetylhexosamine pyrophosphorylase;Isoform 3 of UDP-N-acetylhexosamine pyrophosphorylase	A0A0R4J085_MOUSE;A0A0R4J1F6_MOUSE;Q3TAD4_MOUSE;Q3UHZ7_MOUSE;UAP1_MOUSE;UAP1_MOUSE;UAP1_MOUSE		139.169	123.647	223.414	200.014	206.265	158.966	182.329	151.801	157.398	147.637	169.576	157.718	199.488	173.691	227.424	207.612
Olfml3	Olfactomedin-like 3;Olfactomedin-like protein 3	A0A0R4J086_MOUSE;OLFL3_MOUSE		209.31	175.701	179.253	154.811	200.178	127.091	124.694	119.031	177.638	207.819	187.961	190.942	212.69	212.858	204.507	295.273
Slc6a17	Transporter;Sodium-dependent neutral amino acid transporter SLC6A17	A0A0R4J087_MOUSE;S6A17_MOUSE		5295.79	5049.6	4927.76	5060.65	3961.51	3738.96	4146.98	4203.98	4357.11	4612.84	4369.31	4337.65	3950.86	3986.53	4821.94	4830.56
Pole3	DNA polymerase epsilon subunit 3	A0A0R4J091_MOUSE;DPOE3_MOUSE		NaN	154.933	125.57	104.557	123.541	46.3157	97.46	100.768	NaN	NaN	71.4141	112.423	89.9697	146.969	61.8231	82.3763
Manba	Beta-mannosidase	A0A0R4J092_MOUSE		78.4967	94.7869	87.2516	87.2945	93.6314	87.2201	81.8962	80.3723	103.24	90.7852	94.7918	103.686	96.2973	98.3582	114.714	105.043
Cmpk1	UMP-CMP kinase	A0A0R4J093_MOUSE;KCY_MOUSE		38.4122	39.7894	49.9669	37.7035	22.7474	51.7225	45.7793	39.9432	27.9384	63.411	59.5586	85.2816	38.4939	66.057	72.7498	64.1826
Fahd2a	Fumarylacetoacetate hydrolase domain containing 2A	A0A0R4J094_MOUSE		234.726	258.388	191.571	218.284	119.698	126.881	135.141	120.994	260.255	269.881	285.557	280.11	196.896	163.726	194.583	220.967
2210016L21Rik;Custos	Protein CUSTOS	A0A0R4J099_MOUSE;CSTOS_MOUSE		206.607	145.304	119.538	126.903	198.92	173.533	146.136	140.336	182.607	198.348	169.288	158.409	145.929	145.132	148.79	164.959
Slc17a6	Solute carrier family 17 (sodium-dependent inorganic phosphate cotransporter), member 6;Vesicular glutamate transporter 2	A0A0R4J0A6_MOUSE;VGLU2_MOUSE		3666.61	3705.57	3747.04	3652.37	2965.42	2816.36	2776.95	2697.33	3370.74	3192.83	3288.08	3193.38	2471.9	2554.66	3532.23	3463.65
Ulk1	Serine/threonine-protein kinase;Serine/threonine-protein kinase ULK1	A0A0R4J0B3_MOUSE;ULK1_MOUSE		456.63	418.819	331.929	378.361	485.324	453.405	408.614	411.566	357.152	349.304	292.623	325.587	348.04	346.893	350.656	343.026
Cmas	N-acylneuraminate cytidylyltransferase	A0A0R4J0B4_MOUSE;NEUA_MOUSE		225.889	222.76	213.813	243.784	217.176	228.486	205.779	234.513	192.184	173.398	230.518	226.452	196.985	238.475	281.382	279.883
Rusf1	RUS family member 1	A0A0R4J0B5_MOUSE		180.843	143.331	148.697	172.253	136.884	166.546	154.444	153.333	219.508	233.39	200.908	198.905	176.103	189.088	149.933	161.957
Abcg2	Broad substrate specificity ATP-binding cassette transporter ABCG2;Broad substrate specificity ATP-binding cassette transporter ABCG2;Broad substrate specificity ATP-binding cassette transporter ABCG2;Broad substrate specificity ATP-binding cassette transporter ABCG2 (Fragment)	A0A0R4J0B6_MOUSE;ABCG2_MOUSE;S4R2E1_MOUSE;W8DLN2_MOUSE		179.071	171.269	186.415	179.328	156.383	138.189	165.507	175.341	186.92	181.712	188.027	208.106	179.697	177.432	250.013	247.12
Sh3gl3	SH3-domain GRB2-like 3	A0A0R4J0B8_MOUSE		3594.86	3622.71	3847.28	3780.13	3379.25	3308.12	3467.86	3457.37	3994.79	3849.79	3975.48	3844.02	3647.39	3661.41	4196.38	4258.17
Saraf	Store-operated calcium entry-associated regulatory factor	A0A0R4J0D1_MOUSE;SARAF_MOUSE		22.4853	NaN	22.8941	19.2761	NaN	17.3776	14.1562	21.3748	25.4001	18.8544	19.5857	21.6577	22.6966	29.8946	33.0657	33.0643
Stt3b	dolichyl-diphosphooligosaccharide--protein glycotransferase;Dolichyl-diphosphooligosaccharide--protein glycosyltransferase subunit STT3B	A0A0R4J0D3_MOUSE;STT3B_MOUSE		93.4754	59.1472	44.4186	47.7013	51.6407	43.4454	66.3399	34.2095	57.4528	60.8696	68.4493	56.0752	53.3147	69.3633	62.6925	59.6313
Mon1a	Vacuolar fusion protein MON1 homolog;Vacuolar fusion protein MON1 homolog A	A0A0R4J0D5_MOUSE;MON1A_MOUSE		406.699	386.39	376.826	388.82	414.37	393.359	358.175	395.183	392.432	464.071	363.652	405.674	362.28	388.934	473.162	458.375
Ints7	Integrator complex subunit 7	A0A0R4J0E4_MOUSE		137.161	142.555	116.958	116.864	105.758	105.848	105.821	108.45	101.025	101.086	84.5814	96.623	97.2188	109.979	115.32	124.809
Gak	Cyclin G associated kinase;Cyclin-G-associated kinase;Cyclin-G-associated kinase;Isoform 2 of Cyclin-G-associated kinase	A0A0R4J0F6_MOUSE;Q3UIZ0_MOUSE;GAK_MOUSE;GAK_MOUSE		1386.2	1355.82	1278.2	1227.22	1353.35	1388.02	1192.22	1176.59	1299.67	1279.14	1243.81	1210.4	1328.09	1330.3	1057.51	960.725
Qpct	Glutaminyl-peptide cyclotransferase	A0A0R4J0G6_MOUSE;QPCT_MOUSE		239.262	215.719	213.816	218.63	124.272	147.407	147.382	144.193	160.096	157.097	144.066	159.888	209.638	205.951	228.109	200.435
Eml4	Echinoderm microtubule associated protein like 4	A0A0R4J0H0_MOUSE		313.663	274.972	357.785	369.626	308.161	284.359	326.2	339.124	352.344	378.587	348.695	245.244	326.494	264.398	103.041	163.836
Ncapd2	Condensin complex subunit 1;Condensin complex subunit 1;Isoform 2 of Condensin complex subunit 1	A0A0R4J0H7_MOUSE;CND1_MOUSE;CND1_MOUSE		680.333	861.386	295.793	439.129	752.143	754.075	579.247	563.68	482.754	497.582	606.672	484.589	684.012	708.309	NaN	174.017
Erf	Ets2 repressor factor;ETS domain-containing transcription factor ERF	A0A0R4J0I0_MOUSE;ERF_MOUSE		173.268	175.381	171.611	170.38	172.827	154.412	169.703	169.559	97.4722	104.987	100.226	99.1049	103.316	104.076	133.981	125.236
Lrp1	Low density lipoprotein receptor-related protein 1;Prolow-density lipoprotein receptor-related protein 1	A0A0R4J0I9_MOUSE;LRP1_MOUSE		794.72	800.948	708.014	711.638	841.373	853.576	786.329	786.415	664.543	647.374	698.91	689.88	806.174	805.473	866.579	849.325
Palmd	Palmdelphin	A0A0R4J0J0_MOUSE;PALMD_MOUSE		261.725	283.642	274.179	260.391	254.135	165.713	281.023	247.961	278.872	278.408	232.758	277.676	237.198	241.657	229.147	253.11
Cpne9	Copine family member IX	A0A0R4J0J1_MOUSE		425.749	408.597	402.722	409.764	486.923	477.046	473.374	506.407	522.419	552.353	514.747	504.678	312.339	306.42	367.882	359.331
Ints9	Integrator complex subunit 9	A0A0R4J0J5_MOUSE;INT9_MOUSE		181.599	184.554	177.259	184.989	172.124	198.832	178.772	175.387	141.246	147.444	182.697	187.213	168.965	171.988	233.55	207.056
Specc1l	Cytospin-A	A0A0R4J0J8_MOUSE;CYTSA_MOUSE		1038.47	1092.48	824.115	847.419	851.117	918.936	969.374	811.299	813.199	789.167	688.774	679.932	1037.06	988.088	1290.71	1278.52
Spred3	Sprouty-related EVH1 domain containing 3;Sprouty-related, EVH1 domain-containing protein 3	A0A0R4J0K0_MOUSE;SPRE3_MOUSE		37.6426	26.1732	35.0038	41.4381	36.5337	41.461	46.0079	39.2351	50.5474	48.0519	30.2292	44.3253	36.5582	40.9088	22.5177	54.9471
Selenof	Selenoprotein F	A0A0R4J0K1_MOUSE;SEP15_MOUSE		451.856	431.285	448.221	480.693	412.682	347.736	343.857	380.336	404.824	397.099	398.563	324.533	393.77	360.517	460.878	457.598
Ckap5	Cytoskeleton associated protein 5	A0A0R4J0K2_MOUSE;K3W4R5_MOUSE		823.723	804.728	482.136	504.436	957.204	961.19	712.742	693.944	812.394	832.279	604.858	592.328	826.656	845.867	719.739	726.066
Ap5m1	AP-5 complex subunit mu-1;AP-5 complex subunit mu-1;AP-5 complex subunit mu-1;Isoform 2 of AP-5 complex subunit mu-1	A0A0R4J0K9_MOUSE;A0A2I3BPF2_MOUSE;AP5M1_MOUSE;AP5M1_MOUSE		271.155	223.272	284.491	242.627	234.999	272.324	279.846	222.106	251.112	255.782	194.032	245.412	290.394	246.04	336.867	266.546
Tyw1	tRNA-yW synthesizing protein 1 homolog (S. cerevisiae);tRNA-yW synthesizing protein 1 homolog (S. cerevisiae) (Fragment);S-adenosyl-L-methionine-dependent tRNA 4-demethylwyosine synthase TYW1;Isoform 2 of S-adenosyl-L-methionine-dependent tRNA 4-demethylwyosine synthase TYW1	A0A0R4J0L2_MOUSE;F6VNP0_MOUSE;TYW1_MOUSE;TYW1_MOUSE		NaN	47.3411	18.5131	22.8859	NaN	25.7095	NaN	22.098	15.8299	30.549	18.1324	NaN	19.794	NaN	NaN	NaN
Cog6	Conserved oligomeric Golgi complex subunit 6	A0A0R4J0L5_MOUSE		562.185	553.836	454.869	479.537	558.574	582.083	543.864	514.005	502.796	506.976	442.865	427.831	501.177	514.279	468.459	529.491
Mrps35	Mitochondrial ribosomal protein S35;Small ribosomal subunit protein mS35	A0A0R4J0L6_MOUSE;RT35_MOUSE		164.481	160.878	110.976	107.156	93.6442	99.064	89.7482	89.6513	166.853	146.535	117.245	118.946	100.378	125.658	86.7931	107.879
Ccdc174	Coiled-coil domain containing 174;Coiled-coil domain-containing protein 174;Coiled-coil domain-containing protein 174	A0A0R4J0L8_MOUSE;CC174_MOUSE;Q8C4Q1_MOUSE		NaN	NaN	62.8245	83.8233	60.4556	76.1993	74.1726	71.6017	NaN	44.7286	83.7795	82.0084	62.1427	76.5483	22.1026	NaN
Tbcc	Tubulin-specific chaperone C	A0A0R4J0M1_MOUSE		191.671	177.947	167.516	167.528	182.598	171.968	200.238	154.633	144.591	174.476	155.41	146.534	187.899	177.88	212.162	160.766
Vcpip1	ubiquitinyl hydrolase 1	A0A0R4J0M9_MOUSE		1168.73	1167.23	1133.99	1098.51	1201	1270.44	1222.44	1179.85	922.265	916.134	874.202	897.968	1029.11	1023.72	1120.65	1092.66
Pdcd2	Programmed cell death 2	A0A0R4J0N5_MOUSE		454.372	479.798	460.814	478.375	386.133	440.143	397.546	395.202	416.312	431.707	394.951	367.792	462.722	396.119	462.922	452.643
Acad8	Acyl-Coenzyme A dehydrogenase family, member 8;Isobutyryl-CoA dehydrogenase, mitochondrial	A0A0R4J0P1_MOUSE;ACAD8_MOUSE		2508.92	2411.74	2812.24	2774.17	2597.74	2792.57	2697.36	2625.8	3379.53	3287.86	4149.05	4040.13	2738.25	2839.88	2690.92	2668.2
Pstpip1	Proline-serine-threonine phosphatase-interacting protein 1	A0A0R4J0P5_MOUSE		28.9381	NaN	13.6242	11.5735	26.505	NaN	16.7848	17.9525	NaN	28.2756	15.1755	13.7041	15.1451	15.0168	35.4986	37.2741
Parn	Poly(A)-specific ribonuclease PARN	A0A0R4J0P6_MOUSE		365.49	370.171	377.03	385.383	389.319	392.089	401.778	418.124	380.263	355.24	388.249	392.542	421.795	408.532	354.921	360.341
Slc36a4	Solute carrier family 36 (proton/amino acid symporter), member 4;Solute carrier family 36 (proton/amino acid symporter), member 4;Neutral amino acid uniporter 4	A0A0R4J0Q3_MOUSE;D3Z0L1_MOUSE;S36A4_MOUSE		80.4809	64.1756	70.6569	72.8837	48.7429	43.5305	53.0932	30.9271	90.7964	60.1833	26.7858	35.1781	42.8711	46.2552	55.9735	58.2599
Lmnb2	Lamin B2;Lamin-B2;Isoform B3 of Lamin-B2;Lamin-B2	A0A0R4J0Q5_MOUSE;LMNB2_MOUSE;LMNB2_MOUSE;Q3V159_MOUSE		NaN	94.059	33.9289	61.9382	NaN	NaN	60.7186	76.6974	54.7937	NaN	58.3385	NaN	89.6635	NaN	47.5247	NaN
Trim56	RING-type E3 ubiquitin transferase;E3 ubiquitin-protein ligase TRIM56	A0A0R4J0Q6_MOUSE;TRI56_MOUSE		NaN	44.9479	NaN	12.0849	NaN	17.9637	16.4274	NaN	7.7437	68.2355	NaN	NaN	22.6049	15.1488	13.3478	15.6728
Cog7	Conserved oligomeric Golgi complex subunit 7	A0A0R4J0Q9_MOUSE		782.309	809.791	707.237	713.911	831.413	835.11	758.012	768.385	691.906	686.046	657.06	658.44	704.754	737.565	719.648	726.436
Nat8l	N-acetylaspartate synthetase	A0A0R4J0R4_MOUSE;NAT8L_MOUSE		86.0541	106.326	116.703	95.0545	108.446	104.993	89.8803	94.0177	104.44	120.934	136.528	145.754	115.315	120.74	96.8103	103.524
Cdc42ep1	CDC42 effector protein (Rho GTPase binding) 1	A0A0R4J0S1_MOUSE		412.373	494.281	470.587	441.139	504.309	400.684	477.896	519.814	523.911	465.805	475.108	415.235	482.773	499.355	644.889	633.406
Igfals;Igfals;Igfals;Igfals;Als	Insulin-like growth factor binding protein, acid labile subunit;Insulin-like growth factor-binding protein complex acid labile subunit;MKIAA4111 protein (Fragment);Als splice variant 1;Als splice variant 2 (Fragment)	A0A0R4J0S2_MOUSE;ALS_MOUSE;Q570Z9_MOUSE;Q791Q5_MOUSE;Q9JIL0_MOUSE		NaN	NaN	NaN	NaN	NaN	NaN	NaN	NaN	132.594	119.38	57.2978	72.3825	135.556	125.303	211.646	104.668
Rtn4ip1	Reticulon 4 interacting protein 1;Reticulon-4-interacting protein 1, mitochondrial	A0A0R4J0S3_MOUSE;RT4I1_MOUSE		699.171	743.601	672.707	708	475.002	490.433	466.883	509.256	741.811	938.221	909.851	945.962	642.492	643.959	844.449	854.484
Llgl1	LLGL1 scribble cell polarity complex component	A0A0R4J0S4_MOUSE		2703.93	2730.09	2554.5	2751.71	2801.27	2697.64	2701.42	2668.25	2865.57	2912.53	2933.14	2904.6	2635.61	2631.47	2623.6	2613.66
Arfgap3	ADP-ribosylation factor GTPase-activating protein 3	A0A0R4J0T8_MOUSE;ARFG3_MOUSE		1637.3	1533.76	1545.23	1482.66	1401.65	1300.83	1340.78	1449.69	1328.43	1258.45	1321.47	1266.11	1274.35	1274.96	1145.35	1112.95
Nyap2	Neuronal tyrosine-phophorylated phosphoinositide 3-kinase adaptor 2	A0A0R4J0T9_MOUSE		129.618	104.844	138.311	127.968	170.063	144.366	152.231	110.854	79.2031	102.82	76.2202	81.3457	86.1534	66.7165	128.459	NaN
Per2;Per2;;	Period circadian protein homolog 2	A0A0R4J0U3_MOUSE;PER2_MOUSE;Q3TN36_MOUSE;Q3TW41_MOUSE		162.918	173.373	164.938	148.63	184.237	193.353	187.297	187.651	122.632	153.652	122.966	136.312	145.347	135.664	138.034	154.946
Commd5	COMM domain-containing protein 5	A0A0R4J0U7_MOUSE		462.632	466.068	356.732	345.784	309.474	370.244	351.73	333.362	449.012	461.956	378.543	395.714	359.382	393.447	389.382	379.722
Trmt1l	TRMT1-like protein	A0A0R4J0U8_MOUSE;TRM1L_MOUSE		328.17	361.036	364.506	336.142	365.688	351.264	351.008	355.544	294.974	280.044	284.259	322.408	305.068	314.828	373.22	340.099
Jmy	Junction-mediating and regulatory protein	A0A0R4J0V4_MOUSE		276.3	263.75	271.337	298.926	267.608	323.28	318.868	281.877	226.471	241.955	258.904	250.855	277.299	302.175	316.489	303.989
Polr2a	DNA-directed RNA polymerase subunit;DNA-directed RNA polymerase subunit;DNA-directed RNA polymerase II subunit RPB1	A0A0R4J0V5_MOUSE;O08847_MOUSE;RPB1_MOUSE		274.487	288.572	255.34	246.861	289.824	292.518	265.669	265.061	254.263	270.478	262.272	281.287	279.963	299.801	286.551	273.321
Klhdc3	Kelch domain containing 3	A0A0R4J0W0_MOUSE		165.355	177.033	178.956	165.812	166.229	169.067	174.02	179.395	147.462	135.586	173.447	172.82	153.1	155.352	133.285	156.085
Lrrc40	Leucine rich repeat containing 40;Leucine-rich repeat-containing protein 40	A0A0R4J0W6_MOUSE;LRC40_MOUSE		282.945	293.505	239.892	252.111	204.051	207.828	206.056	201.501	261.046	259.856	262.582	255.536	268.928	265.364	275.358	298.651
Lmtk3	Lemur tyrosine kinase 3;Lemur tyrosine kinase 3;Serine/threonine-protein kinase LMTK3	A0A0R4J0W7_MOUSE;A0A1B0GSR5_MOUSE;LMTK3_MOUSE		223.415	218.602	179.431	168.332	213.498	204.201	179.228	187.963	213.24	211.181	195.978	207.014	188.156	219.389	264.885	226.795
Exoc3l4	Exocyst complex component 3-like 4;Exocyst complex component 3-like protein 4	A0A0R4J0W9_MOUSE;EX3L4_MOUSE		NaN	NaN	26.632	23.7382	NaN	NaN	31.3714	25.6288	47.996	50.4355	37.1767	37.3964	37.3812	43.6168	33.5661	41.9405
Alas1	5-aminolevulinate synthase;5-aminolevulinate synthase;5-aminolevulinate synthase, non-specific, mitochondrial	A0A0R4J0X2_MOUSE;Q3V0B2_MOUSE;HEM1_MOUSE		824.05	792.38	564.693	601.628	538.724	531.397	497.278	672.694	592.226	561.995	573.211	612.419	657.277	636.955	845.632	810.44
Sez6l	Seizure related 6 homolog like;Seizure related 6 homolog like;Seizure 6-like protein	A0A0R4J0Y4_MOUSE;A0A1D5RMI4_MOUSE;SE6L1_MOUSE		1047.71	1051.33	909.217	968.997	1037.25	1243.65	1180.86	1080.93	1001.24	1136.01	1011.82	1012.08	827.738	905.228	941.258	909.151
Pdia4	Protein disulfide-isomerase A4	A0A0R4J0Z1_MOUSE;PDIA4_MOUSE		380.676	391.278	306.537	340.819	275.593	286.136	251.063	236.502	320.316	334.224	280.995	308.595	336.057	322.418	338.471	317.162
Aqp4	Aquaporin-4;Aquaporin-4;Isoform 1 of Aquaporin-4;Isoform 3 of Aquaporin-4;Aquaporin-4;Aquaporin-4 (Fragment)	A0A0R4J0Z3_MOUSE;AQP4_MOUSE;AQP4_MOUSE;AQP4_MOUSE;Q50H70_MOUSE;Q8BR89_MOUSE		210.554	193.99	156.946	174.725	222.402	139.962	171.936	209.092	186.36	144.392	136.203	164.512	297.055	358.441	261.36	311.712
Cpeb3	Cytoplasmic polyadenylation element binding protein 3;Cytoplasmic polyadenylation element-binding protein 3;Isoform 3 of Cytoplasmic polyadenylation element-binding protein 3	A0A0R4J102_MOUSE;CPEB3_MOUSE;CPEB3_MOUSE		897.936	892.997	865.714	887.968	773.139	875.308	811.597	814.69	679.837	677.48	641.271	668.797	671.085	673.125	628.642	636.249
Dab2	Disabled 2, mitogen-responsive phosphoprotein;Disabled 2, mitogen-responsive phosphoprotein;Disabled homolog 2;Isoform p93 of Disabled homolog 2	A0A0R4J104_MOUSE;E9QL31_MOUSE;DAB2_MOUSE;DAB2_MOUSE		55.4211	NaN	55.4849	52.2339	27.7945	38.6667	40.1224	NaN	50.8295	42.9375	88.3148	48.7478	73.8898	78.118	84.6603	101.743
Eif4g3	Eukaryotic translation initiation factor 4 gamma, 3;Isoform 2 of Eukaryotic translation initiation factor 4 gamma 3;Isoform 4 of Eukaryotic translation initiation factor 4 gamma 3;Eukaryotic translation initiation factor 4 gamma, 3	A0A0R4J112_MOUSE;IF4G3_MOUSE;IF4G3_MOUSE;Z4YKC4_MOUSE		224.078	218.187	156.103	153.487	190.304	281.285	234.632	255.43	291.464	311.817	212.017	176.179	174.812	234.118	102.797	112.081
Igsf8	Immunoglobulin superfamily, member 8;Immunoglobulin superfamily, member 8	A0A0R4J117_MOUSE;G3UYZ1_MOUSE		695.375	709.228	604.712	605.252	632.124	575.89	610.209	596.829	470.51	530.432	570.894	552.355	730.128	763.043	711.527	691.98
Cyfip1	Cytoplasmic FMR1-interacting protein	A0A0R4J119_MOUSE		169.765	211.958	238.552	227.43	150.857	174.331	168.63	153.981	163.776	128.971	105.862	133.053	174.329	191.783	235.356	177.731
Srpk2	non-specific serine/threonine protein kinase	A0A0R4J124_MOUSE		1227.88	1239.69	1180.06	1205.69	1554.39	1566.42	1433.3	1407.58	1173.33	1256.46	1227.73	1198.51	1319.28	1219.44	1355.7	1249.82
Btd	Biotinidase	A0A0R4J131_MOUSE;BTD_MOUSE		NaN	NaN	60.1368	65.7305	NaN	63.57	NaN	67.6996	102.478	81.2683	74.3496	37.265	32.6191	46.0334	63.4446	77.4527
Phyhd1	Phytanoyl-CoA dioxygenase domain-containing protein 1;Phytanoyl-CoA dioxygenase domain-containing protein 1 (Fragment);Phytanoyl-CoA dioxygenase domain-containing protein 1	A0A0R4J137_MOUSE;A2AQZ2_MOUSE;PHYD1_MOUSE		NaN	22.5856	24.9277	20.8709	23.1748	26.1683	32.7425	27.6654	34.9985	39.4789	40.8942	34.8297	40.8274	39.4884	44.6978	48.6364
Arsb	Arylsulfatase B	A0A0R4J138_MOUSE;ARSB_MOUSE		93.527	73.8864	72.3364	67.1565	84.9342	77.3206	64.15	69.0711	70.0709	56.5126	49.885	68.8653	50.109	75.1374	86.9463	69.0429
Msrb3	Peptide-methionine (R)-S-oxide reductase	A0A0R4J139_MOUSE		23.3628	34.2827	14.2386	21.7873	16.056	24.1153	32.4773	19.1164	20.2099	24.4351	17.1664	20.8896	19.2179	11.6242	24.5203	28.6719
Cluh	Clustered mitochondria protein homolog	A0A0R4J140_MOUSE		1042.25	1053.26	991.198	1025.39	983.108	988.923	1003.74	1032.77	1042.38	1068.75	1048.48	1050.59	1148.72	1129.74	1195.63	1195.88
Smarca4	SWI/SNF related, matrix associated, actin dependent regulator of chromatin, subfamily a, member 4;Transcription activator BRG1;Isoform 2 of Transcription activator BRG1	A0A0R4J170_MOUSE;SMCA4_MOUSE;SMCA4_MOUSE		596.958	478.741	471.372	459.242	512.692	539.927	442.618	471.168	404.081	404.129	398.155	420.132	601.492	633.913	617.249	632.498
Dlc1	Rho GTPase-activating protein 7	A0A0R4J171_MOUSE;E9PXD2_MOUSE;E9QKB1_MOUSE		157.923	161.251	153.475	156.239	152.23	142.022	164.481	162.264	133.476	126.282	121.353	108.114	137.687	148.031	131.485	130.257
Dennd4b	DENN domain containing 4B;DENN domain-containing protein 4B	A0A0R4J172_MOUSE;DEN4B_MOUSE		810.814	825.685	825.778	841.033	821.999	827.265	864.601	859.117	753.36	771.184	727.37	746.029	709.995	752.561	905.689	863.319
Ecsit	Evolutionarily conserved signaling intermediate in Toll pathway, mitochondrial	A0A0R4J174_MOUSE		133.382	161.887	123.039	105.76	58.7117	104.869	87.6179	95.2078	122.393	154.047	113.947	119.051	109.573	130.768	115.749	104.99
Xrcc6	X-ray repair complementing defective repair in Chinese hamster cells 6	A0A0R4J187_MOUSE		18861.2	16052.9	15707.8	15536.4	21610	21124.9	18719	19586.1	17234.8	19410.9	20217.2	18686.6	20483	20424.5	16295.5	20247.1
Rprd1b	Regulation of nuclear pre-mRNA domain-containing protein;Regulation of nuclear pre-mRNA domain-containing protein 1B	A0A0R4J195_MOUSE;RPR1B_MOUSE		695.519	680.026	900.752	888.423	868.527	886.152	853.149	757.56	590.167	604.011	721.109	700.041	624.368	619.289	763.986	790.6
Chml	Rab proteins geranylgeranyltransferase component A	A0A0R4J1A1_MOUSE		99.0899	104.257	81.8334	82.215	83.5779	92.101	95.5925	91.1025	96.9381	80.3809	91.5978	95.6155	82.5726	89.4059	95.6163	110.636
Dennd5a	DENN domain containing 5A	A0A0R4J1B6_MOUSE		68.9057	NaN	48.9241	44.7693	73.3563	73.747	56.1383	69.9833	30.149	NaN	52.4767	50.0736	42.933	62.5291	51.636	62.4787
Cpne2	Copine II;Copine-2	A0A0R4J1D0_MOUSE;CPNE2_MOUSE		1339.17	1299.19	1319.98	1293.69	1227.09	1130.26	1226.54	1263.57	1380.32	1405.79	1428.93	1374.67	1516.89	1440.15	1625.38	1631.68
Eef1d	Elongation factor 1-delta	A0A0R4J1E2_MOUSE		5745.17	5835.33	5174.69	5254.67	7710.72	7665.28	6582.92	6452.99	6387.51	6544.48	6147.55	5886.01	7012.93	7112.58	6621.78	6584.56
Dbn1	Drebrin 1	A0A0R4J1E3_MOUSE		69.7751	91.5161	92.1899	102.109	72.9401	63.8216	89.5033	102.649	149.751	155.87	145.677	139.498	167.094	200.57	47.4273	30.3856
Smoc1	SPARC related modular calcium binding 1;SPARC related modular calcium binding 1;SPARC related modular calcium binding 1;SPARC-related modular calcium-binding protein 1;Isoform 2 of SPARC-related modular calcium-binding protein 1	A0A0R4J1E4_MOUSE;D3Z3A3_MOUSE;E9QKW2_MOUSE;SMOC1_MOUSE;SMOC1_MOUSE		122.722	125.27	128.894	105.99	163.007	156.761	126.199	137.035	136.125	130.894	144.182	138.748	160.096	165.69	153.917	147.155
Psen2	Presenilin;Presenilin;Presenilin-2;Isoform 2 of Presenilin-2	A0A0R4J1F2_MOUSE;Q3U4P5_MOUSE;PSN2_MOUSE;PSN2_MOUSE		NaN	9.35576	13.6236	6.80095	NaN	NaN	7.74474	10.7313	18.0889	9.53758	NaN	10.9397	28.9592	31.785	19.2009	28.5395
Wdhd1	WD repeat and HMG-box DNA binding protein 1;WD repeat and HMG-box DNA binding protein 1;WD repeat and HMG-box DNA-binding protein 1;Isoform 3 of WD repeat and HMG-box DNA-binding protein 1	A0A0R4J1F8_MOUSE;A0A2K6EDP7_MOUSE;WDHD1_MOUSE;WDHD1_MOUSE		77.6332	NaN	23.8052	48.0904	62.4852	46.7753	88.6272	48.2475	37.7354	32.8654	40.9074	64.3066	31.5076	45.3922	31.9876	41.1328
Glyctk	Glycerate kinase	A0A0R4J1H2_MOUSE		243.688	201.042	231.59	227.603	161.402	164.781	186.802	181.326	165.358	171.858	209.654	217.463	194.889	223.198	233.411	252.507
Rcor2	REST corepressor 2	A0A0R4J1I0_MOUSE;RCOR2_MOUSE		54.1457	NaN	83.8686	84.0425	96.4093	92.7064	97.1096	65.2227	47.366	NaN	63.7356	80.337	62.8695	78.8518	85.3559	92.4642
Men1	Menin	A0A0R4J1I3_MOUSE;D3YZC2_MOUSE;F8WHD9_MOUSE;MEN1_MOUSE		70.265	65.7282	64.2741	49.358	24.3306	35.9281	37.5515	64.5671	38.5837	54.3259	61.0288	33.216	35.1304	35.7645	45.8124	43.9833
Lrrc61	Leucine rich repeat containing 61;Leucine-rich repeat-containing protein 61	A0A0R4J1J6_MOUSE;LRC61_MOUSE		146.585	114.037	112.961	136.475	97.7855	102.567	100.837	99.547	72.179	71.5775	69.9518	69.6317	90.0199	75.9277	115.206	112.837
Cnot4	CCR4-NOT transcription complex, subunit 4;Isoform 3 of CCR4-NOT transcription complex subunit 4	A0A0R4J1K1_MOUSE;CNOT4_MOUSE		560.602	590.819	582.781	559.55	546.014	564.097	519.356	560.194	480.897	450.517	521.23	497.43	483.538	513.316	592.451	628.073
Tnk2	non-specific protein-tyrosine kinase;non-specific protein-tyrosine kinase;non-specific protein-tyrosine kinase;non-specific protein-tyrosine kinase;non-specific protein-tyrosine kinase;non-specific protein-tyrosine kinase;non-specific protein-tyrosine kinase;Activated CDC42 kinase 1;Isoform 2 of Activated CDC42 kinase 1;Isoform 3 of Activated CDC42 kinase 1	A0A0R4J1L0_MOUSE;A0A5F8MPC4_MOUSE;A0A5F8MPM0_MOUSE;A0A5F8MQ87_MOUSE;D3Z3U5_MOUSE;D3Z3U6_MOUSE;G3X9X7_MOUSE;ACK1_MOUSE;ACK1_MOUSE;ACK1_MOUSE		102.7	110.683	81.1618	90.117	121.171	94.1979	90.9909	87.0783	81.8762	97.2482	82.3126	76.9117	92.6023	84.2993	95.83	101.882
Rdh12	Retinol dehydrogenase 12	A0A0R4J1M3_MOUSE;RDH12_MOUSE		76.1497	27.5193	43.7302	28.3066	82.2943	41.3388	57.7438	47.4389	65.2386	92.0301	58.0792	77.5995	50.6193	65.5651	NaN	49.2374
Dpysl4	Dihydropyrimidinase-like 4;Dihydropyrimidinase-related protein 4;Isoform 2 of Dihydropyrimidinase-related protein 4;Dihydropyrimidinase-like 4	A0A0R4J1N0_MOUSE;DPYL4_MOUSE;DPYL4_MOUSE;Q3TMU8_MOUSE		2702.93	2740.7	2876.08	2939.55	3338.34	3457.53	3440.46	3354.95	3410.31	3260.4	3572.54	3618.82	3114	3134.92	2990.36	2934.09
Arsk	Arylsulfatase K	A0A0R4J1N2_MOUSE;ARSK_MOUSE		64.0712	70.9634	40.8705	46.1747	42.469	51.9373	43.5141	33.2956	56.4257	60.8643	48.4744	45.7439	52.5016	43.3885	41.3855	42.1983
Apoc3	Apolipoprotein C-III	A0A0R4J1N3_MOUSE;E9QP56_MOUSE;APOC3_MOUSE		NaN	NaN	55.248	NaN	NaN	20.581	22.5273	21.62	276.321	269.515	298.424	275.875	671.62	641.261	699.913	279.977
Matk	Tyrosine-protein kinase;Tyrosine-protein kinase;Tyrosine-protein kinase;Megakaryocyte-associated tyrosine-protein kinase;Isoform 2 of Megakaryocyte-associated tyrosine-protein kinase;Isoform 3 of Megakaryocyte-associated tyrosine-protein kinase	A0A0R4J1N6_MOUSE;A0A0R4J1P8_MOUSE;D3Z4T5_MOUSE;MATK_MOUSE;MATK_MOUSE;MATK_MOUSE		598.714	661.493	566.317	580.597	725.867	684.893	689.861	719.929	772.839	720.468	735.842	711.896	720.774	689.4	818.751	751.829
Ank1	Ankyrin 1, erythroid;Isoform 6 of Ankyrin-1	A0A0R4J1N7_MOUSE;ANK1_MOUSE		652.391	593.424	460.626	489.895	604.746	602.867	537.934	510.885	574.102	576.089	479.737	490.255	533.259	515.745	516.535	515.803
Tfam	Transcription factor A, mitochondrial;Transcription factor A, mitochondrial;Isoform Nuclear of Transcription factor A, mitochondrial;Transcription factor A, mitochondrial	A0A0R4J1N9_MOUSE;TFAM_MOUSE;TFAM_MOUSE;Q3TSW9_MOUSE		122.094	89.5884	97.4302	120.311	82.8447	88.2404	71.4813	82.6155	116.866	110.681	118.404	112.044	108.302	92.4896	125.36	153.942
Tpm3	Tropomyosin 3, gamma;Tropomyosin alpha-3 chain	A0A0R4J1P2_MOUSE;TPM3_MOUSE		140.053	86.0969	90.8092	105.99	128.42	147.284	89.4681	112.143	181.064	240.503	129.039	123.755	169.574	175.318	150.425	98.4812
Edc4	Enhancer of mRNA-decapping protein 4	A0A0R4J1Q0_MOUSE		1211.71	1340.75	924.824	931.644	1075.63	1156.96	1055.57	992.419	1145.98	1181.43	951.211	930.023	1318.9	1353.69	1425.71	1393.63
Enpp1	Ectonucleotide pyrophosphatase/phosphodiesterase 1;Ectonucleotide pyrophosphatase/phosphodiesterase 1;Ectonucleotide pyrophosphatase/phosphodiesterase family member 1;Isoform 1 of Ectonucleotide pyrophosphatase/phosphodiesterase family member 1	A0A0R4J1Q7_MOUSE;G3X9S2_MOUSE;ENPP1_MOUSE;ENPP1_MOUSE		43.2923	37.2281	40.1033	41.7124	34.298	32.522	31.6022	42.226	44.2993	43.1461	39.6434	29.7732	62.0405	56.7987	64.4507	51.118
Pcbd2	4a-hydroxytetrahydrobiopterin dehydratase	A0A0R4J1R7_MOUSE		614.141	610.818	637.246	632.172	527.699	534.747	530.473	527.283	576.612	589.824	593.784	601.23	547.45	542.291	368.372	326.107
Prpf40b	Pre-mRNA processing factor 40B;Pre-mRNA processing factor 40B;Pre-mRNA processing factor 40B (Fragment);Pre-mRNA processing factor 40B;Pre-mRNA-processing factor 40 homolog B;Isoform 3 of Pre-mRNA-processing factor 40 homolog B	A0A0R4J1S2_MOUSE;D3Z4N6_MOUSE;E9QMI6_MOUSE;E9QP07_MOUSE;PR40B_MOUSE;PR40B_MOUSE		87.6306	72.0947	80.3228	66.0322	68.6787	76.538	60.7418	53.6917	61.9148	63.1284	50.2575	55.907	81.2624	88.4123	67.8887	61.4458
Pogk	Pogo transposable element with KRAB domain;Pogo transposable element with KRAB domain;Pogk protein;Pogo transposable element with KRAB domain	A0A0R4J1T0_MOUSE;E9Q3B2_MOUSE;Q6GQW2_MOUSE;POGK_MOUSE		16.4926	17.1997	13.7517	20.0762	20.0102	21.3918	17.2785	14.3737	15.2552	10.2221	13.6849	10.4492	30.472	23.974	7.09942	9.48168
Aasdh	Aminoadipate-semialdehyde dehydrogenase (Fragment);Beta-alanine-activating enzyme	A0A0R4J1T8_MOUSE;ACSF4_MOUSE		NaN	46.4372	19.6248	19.1728	42.2012	29.8985	20.2449	24.1152	22.9973	29.4685	23.4064	20.7007	14.413	33.3816	23.9497	40.2573
Cdc23	CDC23 cell division cycle 23;Cell division cycle protein 23 homolog	A0A0R4J1W7_MOUSE;CDC23_MOUSE		1707.93	1674.89	1407.58	1505.93	1814.54	1776.83	1684.99	1650.89	1458.01	1504.96	1545.15	1494.92	1760.52	1818.91	1836.11	1862.41
Als2cl	ALS2 C-terminal like;ALS2 C-terminal-like protein;Isoform 2 of ALS2 C-terminal-like protein	A0A0R4J1X4_MOUSE;AL2CL_MOUSE;AL2CL_MOUSE		148.479	537.515	65.7261	47.1258	NaN	NaN	61.0975	65.7084	NaN	49.8031	NaN	44.8984	69.1814	36.1876	70.1435	40.6828
Osgep	N(6)-L-threonylcarbamoyladenine synthase	A0A0R4J1Y3_MOUSE		351.625	376.234	316.833	343.151	340.349	371.166	391.556	353.66	405.201	445.813	388.626	414.061	345.41	411.754	447.306	429.845
Nfya	Nuclear transcription factor Y subunit;Nuclear transcription factor Y subunit;Nuclear transcription factor Y subunit (Fragment);Nuclear transcription factor Y subunit (Fragment);Nuclear transcription factor Y subunit alpha;Isoform Short of Nuclear transcription factor Y subunit alpha;Nuclear transcription factor Y subunit;Nuclear transcription factor Y subunit;Nuclear transcription factor Y subun…	A0A0R4J1Y8_MOUSE;E0CYF3_MOUSE;F6TWX0_MOUSE;F7DFJ2_MOUSE;NFYA_MOUSE;NFYA_MOUSE;Q3UP82_MOUSE;Q8K2W1_MOUSE;Q9DBV7_MOUSE		NaN	NaN	27.6366	23.5682	NaN	NaN	NaN	NaN	NaN	NaN	25.7678	4.87883	NaN	NaN	29.0248	NaN
Tmem33	Transmembrane protein 33	A0A0R4J1Z3_MOUSE;TMM33_MOUSE		760.43	675.635	597.682	638.05	663.989	639.753	681.167	569.415	818.234	765.189	835.555	778.215	753.306	782.778	652.033	614.506
Trmt10a	tRNA methyltransferase 10 homolog A	A0A0R4J205_MOUSE;B9EIT8_MOUSE		117.898	191.224	164.057	192.854	194.967	196.973	144.956	157.554	149.973	141.135	140.951	155.794	161.421	145.188	183.34	142.833
Mocs2	Molybdopterin synthase catalytic subunit	A0A0R4J206_MOUSE		808.335	756.605	713.131	737.876	770.107	724.37	800.874	763.563	710.629	751.312	857.106	816.838	736.123	700.504	793.057	1001
Arhgef25	Rho guanine nucleotide exchange factor (GEF) 25;Rho guanine nucleotide exchange factor (GEF) 25;Rho guanine nucleotide exchange factor (GEF) 25;Rho guanine nucleotide exchange factor 25;Isoform 2 of Rho guanine nucleotide exchange factor 25	A0A0R4J211_MOUSE;A0A1W2P6R9_MOUSE;G5E825_MOUSE;ARHGP_MOUSE;ARHGP_MOUSE		133.711	135.762	115.519	116.488	125.898	116.959	108.157	113.085	140.485	160.729	129.86	121.454	99.9432	120.549	149.548	154.926
Nedd9	Neural precursor cell expressed, developmentally down-regulated gene 9;Enhancer of filamentation 1	A0A0R4J212_MOUSE;CASL_MOUSE		76.2198	91.195	103.264	102.136	75.9802	73.9473	89.8443	87.7109	90.7522	78.1164	82.9891	68.3469	87.3038	88.2045	52.1876	98.5319
Gpatch11	G patch domain-containing protein 11	A0A0R4J215_MOUSE;GPT11_MOUSE		115.133	113.541	82.2574	82.9559	138.062	84.943	106.953	101.117	83.5866	84.619	99.2103	97.6242	92.5448	104.249	117.653	94.3551
Cys1	Cystin 1	A0A0R4J216_MOUSE		55.3485	38.8248	48.9235	35.5027	43.8577	NaN	82.3294	38.2355	44.7294	49.148	69.8579	45.9531	41.3992	38.9232	33.1159	34.8853
Septin10	Septin;Septin;Septin-10;Isoform 2 of Septin-10	A0A0R4J233_MOUSE;A0A1W2P6J7_MOUSE;SEP10_MOUSE;SEP10_MOUSE		94.2727	91.5827	86.4722	81.2432	91.2125	103.18	79.487	88.7705	110.363	113.745	120.175	116.343	96.0495	105.426	110.635	105.013
Ei24	Etoposide induced 2.4 mRNA;Etoposide-induced protein 2.4	A0A0R4J250_MOUSE;EI24_MOUSE		84.5777	NaN	45.1604	48.15	NaN	34.8949	43.8821	40.5167	33.5913	66.3637	44.7003	46.1562	41.0894	54.9464	66.118	71.9563
Xpo4	Exportin-4	A0A0R4J254_MOUSE;XPO4_MOUSE		258.874	261.318	235.207	254.769	258.371	262.438	231.562	245.389	284.261	303.608	289.711	299.687	285.709	290.837	273.854	270.512
Psmb9	Proteasome subunit beta;Proteasome (prosome, macropain) subunit, beta type 9 (large multifunctional peptidase 2);Proteasome (prosome, macropain) subunit, beta type 9 (large multifunctional peptidase 2) (Fragment);Proteasome subunit beta type-9;Proteasome subunit beta type-9;Proteasome subunit beta;Proteasome subunit beta;Proteasome subunit beta	A0A0R4J256_MOUSE;A0A494B9L1_MOUSE;G3UYK5_MOUSE;PSB9_MUSMB;PSB9_MOUSE;Q3TAR7_MOUSE;Q3U7A7_MOUSE;Q4FK25_MOUSE		89.9781	NaN	NaN	47.0511	74.2149	60.814	77.8958	60.2511	93.0615	71.6628	NaN	53.653	85.2437	NaN	69.0182	63.3411
Unc13d	Unc-13 homolog D;Protein unc-13 homolog D;Isoform 2 of Protein unc-13 homolog D	A0A0R4J257_MOUSE;UN13D_MOUSE;UN13D_MOUSE		NaN	NaN	48.3294	37.7101	63.943	81.8258	74.9231	53.4304	101.03	64.4692	70.475	92.9569	55.0852	83.0569	51.8877	34.7071
Syncrip	Synaptotagmin binding, cytoplasmic RNA interacting protein;Isoform 2 of Heterogeneous nuclear ribonucleoprotein Q	A0A0R4J259_MOUSE;HNRPQ_MOUSE		1510.65	1604.5	1443.33	1551.47	1236.31	1187.21	1252.74	1246.91	1672.79	1530.11	1165.68	1232.84	1477.3	1368.85	2450.31	2334.05
Otud4	ubiquitinyl hydrolase 1;OTU domain-containing protein 4	A0A0R4J260_MOUSE;OTUD4_MOUSE		289.669	332.256	249.833	256.066	238.879	233.149	239.729	234.076	267.608	276.32	275.334	259.332	265.569	282.587	280.945	287.189
Scnm1	Sodium channel modifier 1;Sodium channel modifier 1;Isoform 3 of Sodium channel modifier 1	A0A0R4J262_MOUSE;SCNM1_MOUSE;SCNM1_MOUSE		109.93	98.3585	96.2056	98.2277	123.49	98.1949	92.8901	81.0026	68.141	84.2922	93.946	83.8076	82.4311	98.7825	131.481	120.97
Agpat1	1-acyl-sn-glycerol-3-phosphate acyltransferase	A0A0R4J263_MOUSE;Q91VJ9_MOUSE		330.336	357.787	327.515	352.847	315.166	312.179	275.371	268.805	457.995	395.152	397.809	397.231	373.71	389.337	324.762	362.071
Ndufa12	NADH dehydrogenase [ubiquinone] 1 alpha subcomplex subunit 12	A0A0R4J275_MOUSE;Q5M9K5_MOUSE;NDUAC_MOUSE;Q8BME2_MOUSE		116.859	110.857	55.6499	56.0341	50.215	36.4763	46.9728	34.2541	51.4654	50.818	46.2613	33.1639	107.05	122.663	100.352	100.854
Foxp1	Forkhead box P1	A0A0R4J282_MOUSE;D3Z6Q3_MOUSE;H3BJ24_MOUSE;H3BJM1_MOUSE;H3BJR8_MOUSE;H3BL33_MOUSE		84.7519	124.149	78.552	53.0135	63.7738	79.886	68.189	112.113	64.2681	79.517	83.8439	77.1061	104.438	100.185	102.694	91.9094
Dxo	Decapping nuclease;Decapping and exoribonuclease protein	A0A0R4J288_MOUSE;DXO_MOUSE		55.2634	75.4001	66.0033	53.968	99.3914	81.0703	68.1949	84.9578	57.2362	61.8896	77.4351	60.7372	69.9228	53.305	68.9061	54.3174
Fastkd5	FAST kinase domains 5;FAST kinase domain-containing protein 5, mitochondrial	A0A0R4J291_MOUSE;FAKD5_MOUSE		71.0815	82.6049	58.8703	73.6377	NaN	63.8446	NaN	59.9666	92.0214	84.8291	70.2823	69.6644	58.9815	40.4855	71.149	86.0082
Tgm1	Protein-glutamine gamma-glutamyltransferase K	A0A0R4J293_MOUSE;TGM1_MOUSE		102.078	128.467	NaN	44.9806	134.431	145.005	62.2227	68.721	67.6279	84.5433	72.737	93.4154	60.8972	82.502	39.0461	94.0152
Eif2d	Eukaryotic translation initiation factor 2D;Eukaryotic translation initiation factor 2D;Eukaryotic translation initiation factor 2D;Isoform 2 of Eukaryotic translation initiation factor 2D	A0A0R4J298_MOUSE;E9PUG7_MOUSE;EIF2D_MOUSE;EIF2D_MOUSE		77.5999	83.8647	73.0193	69.8318	75.6774	77.7104	79.5081	80.1489	65.475	64.6287	82.3169	70.4919	85.05	74.6631	109.547	96.918
Anks1b	Ankyrin repeat and sterile alpha motif domain containing 1B;Isoform 3 of Ankyrin repeat and sterile alpha motif domain-containing protein 1B	A0A0R4J2A2_MOUSE;ANS1B_MOUSE		61.9965	89.3612	42.9522	46.1496	41.1942	NaN	74.313	62.4876	55.4123	45.0588	46.113	36.756	60.2219	57.9137	44.5102	43.4654
Anks1b	Ankyrin repeat and sterile alpha motif domain containing 1B;Isoform 2 of Ankyrin repeat and sterile alpha motif domain-containing protein 1B	A0A0R4J2A6_MOUSE;ANS1B_MOUSE		1064.43	1133.77	1100.94	1051.74	914.759	923.182	988.899	986.315	667.209	686.287	608.879	494.871	705.52	723.201	1136.97	1052.11
Kctd12	Potassium channel tetramerisation domain containing 12;BTB/POZ domain-containing protein KCTD12	A0A0R4J2B2_MOUSE;KCD12_MOUSE		2423.22	2476.04	2210.19	2163.04	1742.18	1851.99	1803.46	1730.13	2319.42	2144.4	1950.75	2093.38	2446.67	2399.67	2090.91	2182.92
Rbbp5	Retinoblastoma binding protein 5, histone lysine methyltransferase complex subunit;Retinoblastoma-binding protein 5	A0A0R4J2B6_MOUSE;RBBP5_MOUSE		487.492	518.331	393.542	426.887	533.956	544.404	459.957	507.504	450.504	438.229	436.214	428.87	511.003	529.575	401.88	394.21
Syt2	Synaptotagmin;Synaptotagmin (Fragment)	A0A0R4J2C2_MOUSE;Q5DTI3_MOUSE		23662.1	24546.2	22204	22555.9	24704.7	25266.1	25197.9	23760.4	24174.6	23750.6	24256	24405.8	16431.7	17216.2	19578.8	20719.2
Apbb1	Amyloid beta (A4) precursor protein-binding, family B, member 1;Amyloid beta precursor protein binding family B member 1	A0A0R4J2C6_MOUSE;APBB1_MOUSE		5238.33	5497.92	5639.92	5589.33	5186.62	5340.88	5548.5	5389	4933.87	5032.96	5176.43	5125.6	4946.86	4919.33	6368.3	6566.76
Mia3	MIA SH3 domain ER export factor 3;Transport and Golgi organization protein 1 homolog	A0A0R4J2D3_MOUSE;TGO1_MOUSE		130.149	179.499	127.365	124.128	149.551	125.331	106.705	102.438	113.433	143.637	104.868	132.188	122.351	137.973	142.652	142.271
Lcmt1	Leucine carboxyl methyltransferase 1	A0A0U1RNF2_MOUSE		571.207	574.515	377.943	432.96	502.083	534.659	497.926	493.124	513.769	512.287	413.247	420.965	528.971	558.512	425.978	486.381
Kctd14	Potassium channel tetramerisation domain containing 14	A0A0U1RNG7_MOUSE;A0A0U1RPG8_MOUSE		352.12	268.443	380.47	239.507	90.4764	72.6793	145.178	166.552	297.62	287.799	207.807	223.676	118.523	254.383	65.0516	60.8297
Sgf29	SAGA complex associated factor 29;SAGA complex associated factor 29;SAGA-associated factor 29	A0A0U1RNH1_MOUSE;A0A0U1RPT9_MOUSE;SGF29_MOUSE		14.0403	10.7509	7.21398	NaN	15.9655	NaN	NaN	6.65353	NaN	NaN	NaN	NaN	NaN	8.35672	11.1489	8.53152
Maz	MYC-associated zinc finger protein (purine-binding transcription factor);MYC-associated zinc finger protein (purine-binding transcription factor);MYC-associated zinc finger protein (purine-binding transcription factor);Myc-associated zinc finger protein;Maz protein;Transcription factor Pur-1 (Fragment)	A0A0U1RNL1_MOUSE;A0A0U1RNL9_MOUSE;F8VPK3_MOUSE;MAZ_MOUSE;Q05DR9_MOUSE;Q0H9Q2_MOUSE		84.1046	89.035	62.0776	91.0433	90.28	93.8699	63.4353	55.2921	76.8047	53.671	83.2829	75.8546	70.4996	58.3831	82.3961	76.7895
Bckdk	Protein-serine/threonine kinase;Protein-serine/threonine kinase;Branched-chain alpha-ketoacid dehydrogenase kinase;Protein-serine/threonine kinase;Protein-serine/threonine kinase	A0A0U1RNL7_MOUSE;A0A0U1RPT4_MOUSE;BCKD_MOUSE;Q3UC13_MOUSE;Q3UCB5_MOUSE		54.8289	74.8935	48.841	48.7001	60.829	54.9976	52.3538	54.2387	65.5347	65.7951	56.0864	49.8882	66.0642	68.0455	65.318	54.9732
Csnk1g1	Casein kinase I isoform gamma-1	A0A0U1RNW0_MOUSE;A0A0U1RP94_MOUSE;A0A0U1RPD7_MOUSE;A0A0U1RPM8_MOUSE;Q6P2B2_MOUSE;KC1G1_MOUSE		86.134	70.1855	68.7659	79.1543	54.7869	56.8389	67.2397	65.2845	93.7789	72.5909	82.72	81.8232	77.8047	84.1169	90.9013	82.0462
B9d2	B9 domain-containing protein 2;B9 domain-containing protein 2 (Fragment);B9 domain-containing protein 2	A0A0U1RNW5_MOUSE;A0A0U1RPE5_MOUSE;B9D2_MOUSE		45.3578	59.6771	64.3254	57.9921	35.6978	38.1603	38.2706	34.5082	51.9421	62.656	44.097	35.8013	47.8298	57.7821	58.7373	62.8904
Sox6	SRY (sex determining region Y)-box 6;SRY (sex determining region Y)-box 6;SRY (sex determining region Y)-box 6;Transcription factor SOX-6;Isoform 2 of Transcription factor SOX-6;HMG box domain-containing protein;Sox6 protein;SRY (sex determining region Y)-box 6	A0A0U1RNW8_MOUSE;A0A0U1RPC1_MOUSE;E9PUW0_MOUSE;SOX6_MOUSE;SOX6_MOUSE;Q3V1J7_MOUSE;Q6NWW0_MOUSE;Q8BSS6_MOUSE		93.9845	NaN	63.8769	58.9788	72.7601	NaN	53.3624	75.377	66.067	69.7852	44.6276	70.2186	64.3857	67.3484	74.7002	53.0764
Uri1	URI1, prefoldin-like chaperone (Fragment);URI1, prefoldin-like chaperone (Fragment);Unconventional prefoldin RPB5 interactor	A0A0U1RNX4_MOUSE;A0A0U1RPG9_MOUSE;RMP_MOUSE		107.849	125.305	89.8881	89.0717	156.815	139.104	118.532	106.161	87.102	97.5602	86.9248	82.3915	104.495	103.728	94.2146	119.911
Cdipt	CDP-diacylglycerol--inositol 3-phosphatidyltransferase	A0A0U1RP13_MOUSE;CDIPT_MOUSE		970.431	999.386	717.45	755.727	658.369	643.134	717.993	682.454	1036.86	1275.45	997.543	989.201	727.924	796.05	770.637	743.883
Gtf3c1	General transcription factor III C 1;General transcription factor 3C polypeptide 1;Isoform 2 of General transcription factor 3C polypeptide 1	A0A0U1RPD8_MOUSE;TF3C1_MOUSE;TF3C1_MOUSE		201.919	192.377	136.982	155.962	185.488	173.233	166.758	161.952	150.784	153.799	131.071	152.518	178.231	159.396	157.705	170.965
Fxyd1	FXYD domain-containing ion transport regulator 1;Phospholemman	A0A0U1RPI1_MOUSE;PLM_MOUSE		1048.84	907.581	1046.69	1167.04	583.43	587.162	620.866	504.671	801.696	831.948	985.165	824.418	822.013	832.419	883.08	797.688
Rabac1	PRA1 family protein;Prenylated Rab acceptor protein 1	A0A0U1RPM3_MOUSE;PRAF1_MOUSE		322.497	274.652	247.952	161.008	275.11	264.948	228.317	233.747	216.426	228.455	357.23	276.765	294.281	321.485	239.73	184.695
Fxyd7	FXYD domain-containing ion transport regulator;FXYD domain-containing ion transport regulator 7	A0A0U1RPY2_MOUSE;FXYD7_MOUSE		3020.32	2968.73	3765.91	3797.58	2388.57	2318.47	2669.8	2975.92	3026.2	2998.71	2878.94	3216.4	2956.82	2266.47	3769.65	3821.34
Pycard	PYD and CARD domain containing (Fragment);Apoptosis-associated speck-like protein containing CARD;Apoptosis-associated speck-like protein containing a CARD	A0A0U1RQ20_MOUSE;Q54AA2_MOUSE;ASC_MOUSE		88.6456	NaN	84.626	132.107	121.01	57.7884	94.5067	68.4539	88.8869	90.9622	77.2513	74.3714	66.8055	109.967	120.384	164.161
Ube2s	E2 ubiquitin-conjugating enzyme;Ubiquitin-conjugating enzyme E2 S	A0A0U1RQ37_MOUSE;UBE2S_MOUSE		51.1259	65.8686	38.361	38.0869	40.2118	45.8782	49.6747	50.9575	51.1158	47.1571	51.7678	53.8978	59.5902	66.6914	34.7179	42.4264
Emc10	ER membrane protein complex subunit 10;ER membrane protein complex subunit 10 (Fragment);ER membrane protein complex subunit 10;Isoform 2 of ER membrane protein complex subunit 10	A0A0X1KG67_MOUSE;D3Z665_MOUSE;EMC10_MOUSE;EMC10_MOUSE		29.2122	47.133	30.0721	29.4939	28.586	32.0964	32.2541	23.4984	41.5074	45.871	18.4485	39.7824	26.5439	34.9036	23.3189	26.4926
Bub3	Mitotic checkpoint protein BUB3	A0A140LHA2_MOUSE;BUB3_MOUSE		846.039	808.902	946.505	910.62	826.629	779.642	921.723	871.92	816.051	810.121	879.764	907.167	817.867	898.182	967.509	940.318
Acte1	Actin, epsilon 1;Actin, epsilon 1;Actin, epsilon 1	A0A140LHA3_MOUSE;D3YYH9_MOUSE;J3QK70_MOUSE		NaN	134.34	NaN	102.108	NaN	NaN	NaN	NaN	NaN	76.2181	121.474	NaN	79.0974	122.362	NaN	NaN
Mrpl48	Mitochondrial ribosomal protein L48 (Fragment);Mitochondrial ribosomal protein L48;Mitochondrial ribosomal protein L48 (Fragment);Mitochondrial ribosomal protein L48	A0A140LHD4_MOUSE;A0A140LHT6_MOUSE;A0A140LI38_MOUSE;E9QPQ8_MOUSE		52.3993	NaN	39.6239	35.3384	73.3561	80.9583	43.5129	42.6351	56.8869	65.2904	66.2569	62.6592	35.3686	48.8636	NaN	NaN
Med25	Mediator of RNA polymerase II transcription subunit 25;Mediator of RNA polymerase II transcription subunit 25;Mediator of RNA polymerase II transcription subunit 25;Isoform 2 of Mediator of RNA polymerase II transcription subunit 25;Isoform 3 of Mediator of RNA polymerase II transcription subunit 25	A0A140LHG7_MOUSE;A0A140LHQ0_MOUSE;MED25_MOUSE;MED25_MOUSE;MED25_MOUSE		76.5792	81.75	80.6422	80.0105	40.0116	45.5272	57.9283	60.6799	68.136	86.4925	59.8831	77.1085	82.562	60.445	126.353	84.8109
Spcs2	Signal peptidase complex subunit 2;Signal peptidase complex subunit 2;Signal peptidase complex subunit 2 (Fragment);Signal peptidase complex subunit 2;Signal peptidase complex subunit 2	A0A140LHG8_MOUSE;A0A140LHR3_MOUSE;A0A140LJ01_MOUSE;A0A140LJG6_MOUSE;SPCS2_MOUSE		154.664	179.211	123.405	122.927	111.616	135.729	117.031	128.448	207.059	206.967	197.373	196.317	164.218	173.4	273.139	238.298
Adam9	A disintegrin and metallopeptidase domain 9 (meltrin gamma);Disintegrin and metalloproteinase domain-containing protein 9;Disintegrin and metalloproteinase domain-containing protein 9	A0A140LHU0_MOUSE;Q3UG15_MOUSE;ADAM9_MOUSE		25.7551	25.2486	26.1716	30.5888	23.0594	31.6762	21.9785	16.299	34.0875	30.0115	29.2139	30.4351	22.679	24.1374	34.3629	33.3622
Arhgap33;ARHGAP33;Arhgap33;Arhgap33	Rho GTPase activating protein 33;ARHGAP33 (Fragment);Rho GTPase activating protein 33 (Fragment);Rho GTPase-activating protein 33	A0A140LHW2_MOUSE;A0A2X0SFM8_MOUSE;Q3UQS4_MOUSE;RHG33_MOUSE		443.728	439.84	404.682	398.344	363.868	385.428	367.69	344.626	170.63	162.475	147.616	152.859	218.921	218.947	237.255	231.379
Unc13b	Unc-13 homolog B	A0A140LHX5_MOUSE		147.215	136.613	128.747	121.158	148.182	121.376	158.094	150.628	93.4545	102.366	93.7884	96.7244	95.8907	87.2676	115.287	119.561
Fuz	Fuzzy planar cell polarity protein;Fuzzy planar cell polarity protein;Fuzzy planar cell polarity protein;Fuzzy planar cell polarity protein;Protein fuzzy homolog	A0A140LI55_MOUSE;A0A140LIC9_MOUSE;A0A140LJD3_MOUSE;E9QL29_MOUSE;FUZZY_MOUSE		44.1461	30.9064	47.417	53.2718	29.604	NaN	212.564	57.5644	42.6881	54.3549	38.4357	NaN	NaN	28.6943	NaN	NaN
Rap1gap2	RAP1 GTPase activating protein 2 (Fragment)	A0A140LI95_MOUSE		240.987	246.757	411.241	319.01	443.131	429.929	336.09	408.568	379.424	318.368	410.956	514.257	375.499	481.012	300.516	241.008
Fam168a	Family with sequence similarity 168, member A;Family with sequence similarity 168, member A;Protein FAM168A;Isoform 2 of Protein FAM168A	A0A140LIJ1_MOUSE;Q68FE1_MOUSE;F168A_MOUSE;F168A_MOUSE		375.156	407.665	403.054	473.257	495.409	444.424	437.025	450.493	403.133	340.27	389.953	395.615	375.933	322.263	176.508	162.243
Zfand6	AN1-type zinc finger protein 6 (Fragment);AN1-type zinc finger protein 6	A0A140LIM2_MOUSE;ZFAN6_MOUSE		46.7253	NaN	40.4514	40.6194	37.5518	44.1076	33.5031	36.23	34.1932	31.1044	51.9867	52.1697	29.3556	36.6828	40.0791	37.0125
Dnah3	Dynein, axonemal, heavy chain 3;Dynein axonemal heavy chain 3;Isoform 2 of Dynein axonemal heavy chain 3;Isoform 3 of Dynein axonemal heavy chain 3	A0A140LIN9_MOUSE;DYH3_MOUSE;DYH3_MOUSE;DYH3_MOUSE		238.178	268.797	160.688	153.557	10.0971	NaN	192.114	148.196	223.766	193.591	184.5	148.542	77.8699	209.716	287.871	302.22
Aurkc	Aurora kinase (Fragment)	A0A140LIP1_MOUSE		158.918	137.928	123.761	162.374	113.519	66.7655	140.006	130.763	96.166	108.358	67.2422	67.9322	101.191	113.119	176.957	372.608
Arglu1	Arginine and glutamate rich 1 (Fragment);Arginine and glutamate-rich protein 1;Isoform 2 of Arginine and glutamate-rich protein 1	A0A140LIS5_MOUSE;ARGL1_MOUSE;ARGL1_MOUSE		862.509	824.751	322.322	658.997	511.387	644.333	636.117	769.004	263.778	230.618	403.067	637.558	281.082	803.477	514.268	399.206
Dhcr7	7-dehydrocholesterol reductase	A0A140LIT2_MOUSE;DHCR7_MOUSE;Q3UIQ5_MOUSE;Q4FJX5_MOUSE		234.496	206.488	218.184	202.577	163.194	147.162	206.557	196.022	196.147	226.449	310.732	299.78	306.786	229.323	214.924	121.725
Map6	Microtubule-associated protein 6	A0A140LIT9_MOUSE		142.942	113.547	120.221	94.1018	95.7008	104.154	63.6717	82.4085	111.39	98.514	77.3615	88.6004	111.437	102.111	86.8101	105.414
Frmpd3	FERM and PDZ domain containing 3;Frmpd3 (Fragment)	A0A140LIW3_MOUSE;A0A3G0YW97_MOUSE		113.089	110.586	80.4598	68.8068	78.3214	74.4418	63.0917	62.3041	56.3007	57.4694	27.9602	42.6242	47.111	48.8243	53.5654	51.0535
Ankfn1	Ankyrin-repeat and fibronectin type III domain containing 1 (Fragment);Ankyrin-repeat and fibronectin type III domain-containing 1	A0A140LIW7_MOUSE;ANKF1_MOUSE		317.309	319.541	296.58	318.481	273.118	280.157	251.813	261.489	227.988	253.54	242.125	242.796	286.614	284.502	349.202	353.084
Nhsl1	NHS-like 1;NHS-like protein 1;Isoform 3 of NHS-like protein 1	A0A140LIZ7_MOUSE;NHSL1_MOUSE;NHSL1_MOUSE		44.4179	47.4409	54.3536	50.9568	35.238	38.6273	48.1474	43.2095	39.4925	48.6934	31.0905	32.1201	43.3654	44.1595	46.8685	53.8391
Zzef1	Zinc finger, ZZ-type with EF hand domain 1	A0A140LJ04_MOUSE		472.669	452.974	386.645	396.089	421.697	435.676	406.346	408.616	440.683	445.991	431.658	444.039	351.285	356.972	380.025	381.313
Gemin7	Gem nuclear organelle associated protein 7 (Fragment);Gem nuclear organelle associated protein 7 (Fragment);Gem-associated protein 7	A0A140LJ80_MOUSE;D3Z684_MOUSE;GEMI7_MOUSE		409.434	320.85	155.242	183.365	207.958	236.033	201.19	205.757	273.02	247.454	141.803	191.297	188.323	249.547	189.69	180.784
Gps1	G protein pathway suppressor 1	A0A140LJB7_MOUSE		525.633	535.072	713.756	696.547	752.105	675.586	620.428	500.322	721.952	734.271	653.934	706.744	784.403	728.261	234.37	262.194
Gm19410	Predicted gene, 19410	A0A140LJC7_MOUSE		65.2986	93.3659	73.0149	63.3774	57.8991	66.7308	59.8767	56.4299	62.91	43.4345	48.4433	57.0026	51.0453	46.2346	60.2803	55.0449
Tanc2	Tetratricopeptide repeat, ankyrin repeat and coiled-coil containing 2 (Fragment)	A0A140LJD2_MOUSE		504.593	486.954	399.013	425.61	427.791	446.394	428.431	476.213	244.103	233.474	209.008	214.734	234.126	182.75	217.083	161.995
Ryr3	Ryanodine receptor 3;Ryanodine receptor 3;Ryanodine receptor 3;Isoform 2 of Ryanodine receptor 3;Ryanodine receptor 3	A0A140LJF7_MOUSE;A0A140LJK7_MOUSE;RYR3_MOUSE;RYR3_MOUSE;E9PW34_MOUSE		406.471	455.729	222.351	176.629	345.429	225.662	305.889	274.979	194.428	331.587	217.594	231.184	245.714	240.293	253.346	275.367
Akap13	A kinase (PRKA) anchor protein 13;Isoform 2 of A-kinase anchor protein 13	A0A140LJJ5_MOUSE;AKP13_MOUSE		195.972	187.11	144.803	160.54	121.392	156.547	132.126	148.806	132.389	122.324	111.965	103.913	185.203	136.564	140.469	150.298
Hebp1	Heme-binding protein 1	A0A140T8J4_MOUSE;HEBP1_MOUSE		75.1937	60.5	52.0848	50.7829	42.5316	56.0565	57.0356	53.9293	71.7658	61.0922	49.9567	57.7759	99.2341	111.592	150.639	144.858
Igkv6-15	Immunoglobulin kappa variable 6-15 (Fragment)	A0A140T8M5_MOUSE		764.132	NaN	NaN	NaN	144.6	NaN	NaN	176.581	306.254	271.674	201.125	222.031	144.735	174.446	135.185	117.823
Igkv12-46;;Igkv12-41;G8(anti-MRBC) V-2/ J-L;	Immunoglobulin kappa variable 12-46 (Fragment);E8 variable light chain (Fragment);Immunoglobulin kappa chain variable 12-41 (Fragment);G8(Anti-MRBC hybridoma) light chain (Fragment);Pterin-mimicking anti-idiotope kappa chain variable region (Fragment)	A0A140T8P6_MOUSE;A2NW56_MOUSE;KV5A3_MOUSE;Q5R3T5_MOUSE;Q920E6_MOUSE		NaN	NaN	NaN	NaN	NaN	NaN	NaN	NaN	57.3012	93.2412	91.8912	112.796	NaN	61.8659	50.3606	95.9635
Rcor1	REST corepressor 1	A0A140T8R7_MOUSE;RCOR1_MOUSE		127.935	140.369	100.04	108.97	107.628	98.3946	83.2158	86.7417	83.6705	105.303	89.8893	113.459	116.651	98.3455	105.413	107.424
Rpl9-ps6;Rpl9;Rpl9	Large ribosomal subunit protein uL6	A0A140T8T4_MOUSE;RL9_MOUSE;Q5EBQ6_MOUSE		665.073	647.262	453.796	454.67	806.851	693.271	502.599	502.737	428.475	433.332	350.953	352.663	687.683	698.484	400.684	411.966
Map4	Microtubule-associated protein	A0A140T8T5_MOUSE		558.768	386.103	332.935	282.712	501.882	490.21	317.054	337.733	548.167	605.306	521.437	427.437	615.08	576.5	414.508	389.418
Islr	Mesenchymal stromal cell-and fibroblast-expressing Linx paralogue;Immunoglobulin superfamily containing leucine-rich repeat protein	A0A146E664_MOUSE;ISLR_MOUSE		NaN	NaN	67.1501	84.9888	104.455	91.5748	NaN	87.2575	101.085	81.4036	74.5327	90.029	102.202	109.954	85.8054	175.037
Eeig1	Family with sequence similarity 102, member A;Early estrogen-induced gene 1 protein	A0A158RFU0_MOUSE;EEIG1_MOUSE		121.383	103.822	99.56	93.3801	72.0357	96.9082	77.4688	81.4982	124.815	144.061	92.2165	104.142	87.1146	96.98	124.548	112.425
Paip2b	Poly(A) binding protein interacting protein 2B;Polyadenylate-binding protein-interacting protein 2B	A0A158RFV3_MOUSE;PAI2B_MOUSE		185.556	174.619	100.865	173.283	99.6476	99.8207	114.178	102.412	121.32	99.3619	116.37	138.584	81.3735	104.503	111.729	125.998
Plxna3	Plexin A3;Plexin-A3;Isoform 2 of Plexin-A3	A0A158SIT4_MOUSE;PLXA3_MOUSE;PLXA3_MOUSE		92.4077	55.1632	56.8878	47.728	NaN	35.1415	NaN	NaN	25.8234	65.1923	48.2885	22.401	29.2587	26.8338	59.0345	25.712
Lage3	L antigen family, member 3;EKC/KEOPS complex subunit Lage3	A0A158SIT5_MOUSE;LAGE3_MOUSE		666.436	589.16	734.633	735.883	647.872	947.821	777.947	703.829	814.507	795.835	846.623	917.76	958.55	768.103	1156	1295.23
Pelp1	Proline-, glutamic acid- and leucine-rich protein 1;Proline-, glutamic acid- and leucine-rich protein 1	A0A158SIT8_MOUSE;PELP1_MOUSE		96.7412	107.264	69.9591	55.925	84.7979	75.3985	74.1831	80.042	60.4477	64.3845	44.5511	37.485	66.9555	66.8381	63.6075	59.9775
Arrb2	Beta-arrestin-2;Beta-arrestin-2;Beta-arrestin-2;Isoform 2 of Beta-arrestin-2	A0A158SIT9_MOUSE;J3JS97_MOUSE;ARRB2_MOUSE;ARRB2_MOUSE		216.477	206.324	186.25	191.695	174.366	177.004	202.61	188.587	142.673	168.785	143.377	167.503	168.969	176.781	194.461	161.64
Rap1gap2	RAP1 GTPase activating protein 2	A0A171EBK8_MOUSE		52.5893	89.4874	53.1169	63.5077	78.3876	48.6076	74.9614	67.9113	73.7757	81.3579	63.955	75.9385	58.8308	47.3947	71.7004	79.4754
Rnf213	Ring finger protein 213;Ring finger protein 213;E3 ubiquitin-protein ligase RNF213	A0A171EBL2_MOUSE;A0A8I4P9C4_MOUSE;RN213_MOUSE		253.548	185.941	175.48	205.279	173.218	177.7	206.241	194.232	191.058	182.095	194.994	196.652	189.789	248.751	299.325	262.882
Cd248	Endosialin (Fragment);Endosialin	A0A172Q386_MOUSE;CD248_MOUSE		NaN	NaN	NaN	41.1013	NaN	NaN	NaN	NaN	NaN	NaN	NaN	NaN	NaN	NaN	71.6659	95.387
Ece1	Endothelin-converting enzyme 1;Endothelin-converting enzyme 1;Isoform A of Endothelin-converting enzyme 1;Isoform C of Endothelin-converting enzyme 1;Isoform D of Endothelin-converting enzyme 1	A0A183ZRM3_MOUSE;ECE1_MOUSE;ECE1_MOUSE;ECE1_MOUSE;ECE1_MOUSE		84.984	84.3941	77.3985	82.227	78.9229	70.6196	79.4368	68.2774	89.0627	108.207	71.9907	88.638	93.7971	111.517	98.3069	116.109
Klhl2	Kelch-like 2, Mayven;MKIAA4249 protein (Fragment);Kelch-like protein 2	A0A1B0GQV2_MOUSE;Q5DTF0_MOUSE;KLHL2_MOUSE		132.296	114.786	105.125	99.8681	133.175	118.827	111.486	98.4209	94.6197	116.507	110.692	107.099	137.318	120.96	124.629	131.853
Rbl2	RB transcriptional corepressor like 2;RB transcriptional corepressor like 2;Retinoblastoma-like protein 2	A0A1B0GR06_MOUSE;A0A1B0GRM0_MOUSE;RBL2_MOUSE		87.2324	97.7914	85.6219	95.2931	84.0513	91.6292	84.6605	85.128	89.1633	88.828	84.1236	94.29	85.8565	85.5365	76.1729	89.7827
Tubgcp2	Gamma-tubulin complex component (Fragment);Gamma-tubulin complex component;Gamma-tubulin complex component 2	A0A1B0GR08_MOUSE;Q3UIT6_MOUSE;GCP2_MOUSE		291.228	254.634	213.654	196.612	271.503	260.542	230.525	236.241	259.986	266.798	238	249.035	308.572	321.175	314.352	283.632
Rcn3	Reticulocalbin 3, EF-hand calcium binding domain (Fragment);Reticulocalbin 3, EF-hand calcium binding domain (Fragment);Reticulocalbin-3	A0A1B0GR19_MOUSE;A0A1B0GR86_MOUSE;RCN3_MOUSE		121.179	136.432	117.058	123.473	90.0389	78.8843	83.2253	81.7221	102.818	91.9318	91.0092	110.586	134.911	143.425	145.269	159.238
Sult2b1	Sulfotransferase;Sulfotransferase;Sulfotransferase 2B1;Isoform 2 of Sulfotransferase 2B1	A0A1B0GR49_MOUSE;A0A1B0GST5_MOUSE;ST2B1_MOUSE;ST2B1_MOUSE		75.0107	85.8523	51.8587	52.6798	66.4234	69.5919	74.7574	102.309	88.4295	103.497	65.4902	82.7703	47.1966	80.8913	69.3673	91.5468
Rnf170	Ring finger protein 170 (Fragment);E3 ubiquitin-protein ligase RNF170;Isoform 2 of E3 ubiquitin-protein ligase RNF170	A0A1B0GR51_MOUSE;RN170_MOUSE;RN170_MOUSE		116.139	118.181	91.3931	95.1823	79.8969	72.4299	65.3174	65.9555	96.075	117.892	87.1501	102.514	94.5021	81.0536	106.814	93.1778
Hdac9	Histone deacetylase	A0A1B0GR65_MOUSE;A0A1B0GSQ5_MOUSE		273.788	277.931	243.926	272.635	230.031	235.895	233.014	217.842	215.161	218.118	193.877	203.102	235.119	254.171	299.926	289.633
2900026A02Rik	RIKEN cDNA 2900026A02 gene	A0A1B0GR85_MOUSE		1079.44	924.704	826.81	955.853	1083.25	998.515	960.929	957.104	1071.29	1166.64	1132.56	978.476	1028.01	1120.35	986.074	939.651
Sorcs1;Sorcs1;Sorcs1;Sorcs1;Sorcs1;Sorcs1;Sorcs1;sorCS1;sorCS1;sorCS1;Sorcs1;Sorcs1;Sorcs1;Sorcs1;Sorcs1	Sortilin-related VPS10 domain containing receptor 1;Sortilin-related VPS10 domain containing receptor 1;Sortilin-related VPS10 domain containing receptor 1;Sortilin-related VPS10 domain containing receptor 1;Sortilin-related VPS10 domain containing receptor 1;Sortilin-related VPS10 domain containing receptor 1;Sortilin-related VPS10 domain containing receptor 1;SorCS1a;SorCS1c;SorCS1b;PKD domain-…	A0A1B0GRB7_MOUSE;A0A1B0GRC4_MOUSE;A0A1B0GRN1_MOUSE;A0A1B0GT94_MOUSE;E9PYT6_MOUSE;E9QQ02_MOUSE;E9QQ63_MOUSE;Q1HL23_MOUSE;Q1HL24_MOUSE;Q1HL25_MOUSE;Q8BSV0_MOUSE;SORC1_MOUSE;SORC1_MOUSE;SORC1_MOUSE;SORC1_MOUSE		116.76	116.34	95.4407	101.109	99.6274	102.744	75.5678	89.7689	90.1973	89.8422	91.1735	90.9225	86.076	97.9946	99.8249	106.137
Stx3	Syntaxin 3;t-SNARE coiled-coil homology domain-containing protein;Syntaxin-3;Isoform 3B of Syntaxin-3;t-SNARE coiled-coil homology domain-containing protein	A0A1B0GRC2_MOUSE;Q3UZI9_MOUSE;STX3_MOUSE;STX3_MOUSE;Q8CAN1_MOUSE		94.1681	139.632	113.186	108.319	122.826	87.8892	93.6705	75.6165	53.0151	132.297	128.044	84.3251	116.321	124.507	88.3158	100.723
Ptpre	Receptor-type tyrosine-protein phosphatase;Receptor-type tyrosine-protein phosphatase;Receptor-type tyrosine-protein phosphatase epsilon;Isoform 2 of Receptor-type tyrosine-protein phosphatase epsilon;Isoform 3 of Receptor-type tyrosine-protein phosphatase epsilon;Receptor-type tyrosine-protein phosphatase	A0A1B0GRH2_MOUSE;A0A1B0GRT6_MOUSE;PTPRE_MOUSE;PTPRE_MOUSE;PTPRE_MOUSE;Q3V1H5_MOUSE		314.483	282.911	252.2	246.454	231.861	229.141	236.271	231.673	256.555	259.375	227.253	245.312	272.912	272.867	301.725	296.643
Zc3h4	Zinc finger CCCH-type containing 4;Zinc finger CCCH-type containing 4;Zinc finger CCCH domain-containing protein 4;Isoform 2 of Zinc finger CCCH domain-containing protein 4	A0A1B0GRU3_MOUSE;E9Q8K8_MOUSE;ZC3H4_MOUSE;ZC3H4_MOUSE		92.2458	89.3627	72.1705	78.4913	47.2164	63.0813	59.4313	59.9775	72.4618	78.3858	59.1872	59.6656	72.7898	96.8835	90.0808	88.7318
Bpnt1	3'(2'),5'-bisphosphate nucleotidase 1	A0A1B0GRV0_MOUSE		14.7427	14.2346	19.9979	16.9328	37.4686	9.57733	26.9145	9.77003	23.0171	32.1845	8.45548	32.0788	15.9682	15.8087	NaN	3.88368
Rfx1	Regulatory factor X, 1 (influences HLA class II expression);MHC class II regulatory factor RFX1;RFX-type winged-helix domain-containing protein	A0A1B0GRV3_MOUSE;RFX1_MOUSE;Q8BJK3_MOUSE		196.155	181.657	150.057	145.325	129.984	121.401	98.1996	144.914	132.97	177.639	123.183	122.277	141.722	162.809	172.223	140.9
Ssbp4	Single stranded DNA binding protein 4	A0A1B0GRX5_MOUSE		50.3033	29.7106	39.63	25.8942	18.7447	40.3274	23.2186	23.7399	25.0024	22.2969	27.3434	28.561	41.7035	27.2868	NaN	NaN
Gm45861	Predicted gene 45861	A0A1B0GRY3_MOUSE;A0A1B0GS20_MOUSE		NaN	NaN	209.368	301.519	541.626	481.596	275.675	250.793	NaN	243.808	NaN	NaN	NaN	456.541	NaN	NaN
Stum	Mechanosensory transduction mediator;Mechanosensory transduction mediator;Protein stum homolog	A0A1B0GS08_MOUSE;J3QP43_MOUSE;STUM_MOUSE		900.009	1420.97	650.283	890.052	1055.8	707.967	706.711	713.823	711.725	954.18	646.415	592.844	907.744	986.957	521.267	641.705
Gab1	Growth factor receptor bound protein 2-associated protein 1;Gab1 protein;GRB2-associated-binding protein 1	A0A1B0GS41_MOUSE;Q505A4_MOUSE;GAB1_MOUSE		357.692	390.882	318.594	341.671	375.401	392.994	356.997	392.654	349.297	356.172	383.888	343.453	426.877	372.942	360.298	376.388
Arfip2	ADP-ribosylation factor interacting protein 2;Arfaptin-2	A0A1B0GS63_MOUSE;ARFP2_MOUSE		3914.65	3754	4090.15	4208.76	3449.45	3679.31	3940.94	3955.6	4762.01	4925.81	5193	5195.29	4195.2	4239.79	4264.51	4526.41
Svil	Supervillin;Supervillin muscle-specific isoform;Supervillin;Supervillin (Fragment);HP domain-containing protein (Fragment);Svil protein (Fragment);Svil protein (Fragment);Supervillin;Isoform 2 of Supervillin;Svil protein (Fragment)	A0A1B0GS91_MOUSE;E3VVQ8_MOUSE;E9Q3Z5_MOUSE;F6TBK9_MOUSE;Q3TTX5_MOUSE;Q7TMJ2_MOUSE;Q7TN21_MOUSE;SVIL_MOUSE;SVIL_MOUSE;Q99KQ8_MOUSE		NaN	NaN	NaN	NaN	NaN	188.552	143.211	150.704	118.478	NaN	61.5801	NaN	NaN	NaN	NaN	NaN
Tti2	TELO2 interacting protein 2;TELO2-interacting protein 2;TELO2-interacting protein 2	A0A1B0GSJ1_MOUSE;TTI2_MOUSE;Q8BNA7_MOUSE		29.3289	37.4803	33.9946	28.1511	23.8253	43.0787	32.7773	28.5395	30.1496	27.2034	27.0019	32.2107	38.2725	32.7325	52.9081	69.7095
Zfp511;Znf511;Znf511	Zinc finger protein 511;Zinc finger protein 511;Isoform 2 of Zinc finger protein 511	A0A1B0GSJ9_MOUSE;ZN511_MOUSE;ZN511_MOUSE		82.9715	124.088	86.623	76.1368	69.1623	73.5483	101.71	147.855	111.988	99.1217	81.2703	86.2516	105.427	109.987	174.854	155.088
Cnih3	Cornichon family AMPA receptor auxiliary protein 3;Cornichon family AMPA receptor auxiliary protein 3;Protein cornichon homolog 3;Cornichon family AMPA receptor auxiliary protein 3	A0A1B0GSP1_MOUSE;G3XA11_MOUSE;CNIH3_MOUSE;Q9D6E1_MOUSE		89.2591	68.3536	88.6047	62.605	42.7425	87.9283	47.4191	65.7914	83.4582	72.6149	90.2301	68.7016	95.1834	79.1813	72.4081	122.595
Unc5d	Netrin receptor UNC5;Netrin receptor UNC5;Netrin receptor UNC5;Netrin receptor UNC5;Netrin receptor UNC5D	A0A1B0GSR6_MOUSE;A6H5Z5_MOUSE;B7ZMT3_MOUSE;C5IAW8_MOUSE;UNC5D_MOUSE		68.3101	NaN	36.0674	45.745	46.0419	50.3789	42.0096	37.1907	41.5325	23.5217	42.7366	40.5357	30.4496	40.7644	43.6962	18.3407
Aldh16a1	Aldehyde dehydrogenase family 16 member A1	A0A1B0GSU0_MOUSE		230.34	230.063	236.245	247.619	218.677	256.822	232.153	236.509	209.978	218.118	226.364	252.659	289.718	265.709	271.441	276.381
Mrpl17	Large ribosomal subunit protein bL17m (Fragment);Large ribosomal subunit protein bL17m	A0A1B0GSV1_MOUSE;RM17_MOUSE		109.642	77.7541	96.8307	78.5195	72.2299	134.489	97.7649	78.4556	159.804	122.668	105.945	101.467	94.9878	91.9888	77.1341	78.7098
Ldha	L-lactate dehydrogenase;L-lactate dehydrogenase A chain;L-lactate dehydrogenase	A0A1B0GSX0_MOUSE;LDHA_MOUSE;Q564E2_MOUSE		6838.92	7434.98	6658.65	6638.53	7463.66	7226.32	7018.38	6532.15	8380.12	8061.07	6716.19	7422.1	8010.9	8085.24	7805.76	7882.9
Nup98	Nuclear pore complex protein Nup98-Nup96	A0A1B0GSX7_MOUSE		688.953	625.163	539.949	575.277	591.635	623.625	595.114	604.946	500.53	571.195	568.537	541.974	564.766	613.35	571.052	506.02
Pnma8c	PNMA family member 8C	A0A1B0GT27_MOUSE		69.5833	68.2827	87.7531	75.3429	84.3369	68.7779	85.2301	95.3906	40.7039	76.3351	70.3366	62.5387	35.4606	70.2307	61.6256	65.8242
Bax	BCL2-associated X protein;Apoptosis regulator BAX;Bcl-2 Bcl-2 homology region 1-3 domain-containing protein;Bcl-2 Bcl-2 homology region 1-3 domain-containing protein	A0A1B0GT81_MOUSE;BAX_MOUSE;Q3TXJ7_MOUSE;Q544Z6_MOUSE		4163.95	3603.75	3513.55	3640.09	3552.64	3379.65	3607.45	3336.38	3624.1	3636.85	3421.44	3408.41	3582.24	3442.44	5024.49	5087.72
Begain	Brain-enriched guanylate kinase-associated;Brain-enriched guanylate kinase-associated;Brain-enriched guanylate kinase-associated;Brain-enriched guanylate kinase-associated protein	A0A1B0GT88_MOUSE;A0A5F8MPR2_MOUSE;F8WIG2_MOUSE;BEGIN_MOUSE		130.492	123.333	96.201	115.423	144.279	137.639	111.451	105.393	78.9956	80.9885	94.4807	71.3431	116.616	101.557	84.07	106.121
Fhip1b	FHF complex subunit HOOK-interacting protein 1B	A0A1C7CYU5_MOUSE		14.4647	30.1048	15.0538	22.7048	NaN	16.3539	27.5277	17.0665	24.6019	23.2254	18.3024	20.4643	22.2262	25.3407	39.6199	33.5871
Shank2	SH3 and multiple ankyrin repeat domains 2;Isoform 3 of SH3 and multiple ankyrin repeat domains protein 2	A0A1C7ZMY3_MOUSE;SHAN2_MOUSE		207.363	127.53	184.709	151.743	239.276	321.864	223.088	154.642	282.63	295.825	286.229	273.557	129.339	234.808	202.779	184.882
Cherp	Calcium homeostasis endoplasmic reticulum protein	A0A1D5RL92_MOUSE;CHERP_MOUSE		154.406	127.307	128.505	120.19	151.464	165.194	159.151	171.166	120.709	113.855	144.141	156.317	142.058	166.435	142.058	143.741
Ank2	Ankyrin 2, brain (Fragment)	A0A1D5RLB2_MOUSE		100.69	104.819	86.4756	74.5477	105.194	71.1543	98.4279	92.6358	186.713	179.561	110.294	165.363	162.351	150.553	98.3539	82.7416
Reep1	Receptor expression-enhancing protein;Receptor expression-enhancing protein 1	A0A1D5RLF1_MOUSE;REEP1_MOUSE		925.096	962.94	987.518	860.978	739.589	754.682	716.308	745.921	804.867	831.211	780.523	879.857	734.983	724.621	872.713	698.429
Mast3	Microtubule associated serine/threonine kinase 3 (Fragment)	A0A1D5RLF9_MOUSE		78.6826	74.9721	75.2699	64.5718	45.935	55.3705	55.2338	71.8404	62.7112	58.1725	36.22	55.4389	56.7273	43.0621	55.7982	43.5673
Hsdl1	Inactive hydroxysteroid dehydrogenase-like protein 1	A0A1D5RLG0_MOUSE;HSDL1_MOUSE		71.6304	76.0726	63.7024	60.6611	42.6291	44.5402	39.6777	34.5786	46.357	45.0745	40.2636	45.6624	63.8552	52.0148	59.3725	71.9401
Rab3gap1	Rab3 GTPase-activating protein catalytic subunit	A0A1D5RLG3_MOUSE		1057.78	1058.66	1182.13	1176.33	925.859	892.733	935.526	1063.83	977.76	1071	956.33	987.07	888.655	929.61	1168.34	1227.62
Wdr59	WD repeat domain 59;GATOR2 complex protein WDR59;Isoform 2 of GATOR2 complex protein WDR59;Isoform 3 of GATOR2 complex protein WDR59	A0A1D5RLJ8_MOUSE;WDR59_MOUSE;WDR59_MOUSE;WDR59_MOUSE		96.3879	95.2223	67.6197	70.324	81.9092	81.3256	83.6976	82.8072	47.622	54.7837	42.8235	43.21	72.7207	61.9156	61.9983	44.0365
Rtkn	Rhotekin (Fragment)	A0A1D5RLJ9_MOUSE		277.273	412.871	339.629	260.708	352.913	374.349	191.19	297.806	301.962	243.719	351.415	318.251	170.579	205.287	102.534	87.986
Trrap	Transformation/transcription domain-associated protein	A0A1D5RLL4_MOUSE;E9PWT1_MOUSE;E9PZA7_MOUSE;E9QLK7_MOUSE		38.1464	26.8551	4.26778	NaN	12.2001	9.58618	19.7634	17.4119	28.4166	35.1231	7.17034	22.1931	13.9829	23.1421	NaN	NaN
Kifc3	Kinesin-like protein;Kinesin-like protein;Kinesin-like protein KIFC3;Isoform 2 of Kinesin-like protein KIFC3	A0A1D5RLM0_MOUSE;E9PWU7_MOUSE;KIFC3_MOUSE;KIFC3_MOUSE		4340.83	3292.43	3043.59	2984.79	3368.13	3701.79	3326.89	3151.54	1796.42	2570.59	2354.81	3006.3	4381.02	2480.79	1206.56	1051.36
2900026A02Rik	RIKEN cDNA 2900026A02 gene	A0A1D5RLN6_MOUSE		490.353	539.838	523.981	524.705	456.702	466.251	402.455	449.083	548.732	569.433	527.684	566.324	475.599	522.599	671.763	544.571
Cotl1	Coactosin-like 1 (Dictyostelium);Cotl1 protein;Coactosin-like protein	A0A1D5RLP1_MOUSE;Q544F6_MOUSE;COTL1_MOUSE		NaN	14.6378	9.34818	15.7795	5.34991	19.2033	11.6945	8.8132	17.4954	18.8652	34.0417	33.7322	8.59287	18.8947	18.7364	11.5604
Mau2	MAU2 chromatid cohesion factor homolog;MAU2 chromatid cohesion factor homolog;Isoform 2 of MAU2 chromatid cohesion factor homolog	A0A1D5RLR7_MOUSE;SCC4_MOUSE;SCC4_MOUSE		81.8038	85.9663	63.1412	49.736	67.212	68.9592	70.1734	53.7683	65.9531	73.4229	29.0927	69.379	57.9104	52.5932	69.3259	49.7968
Capn15	Calpain 15	A0A1D5RLS3_MOUSE		98.1213	100.696	70.9321	80.3011	71.0642	88.6935	83.1201	76.0457	73.36	73.5636	77.9938	81.1924	77.6488	80.7804	84.3765	85.2986
Gramd1b	GRAM domain containing 1B;GRAM domain containing 1B;GRAM domain containing 1B;Protein Aster-B;Isoform 3 of Protein Aster-B;Isoform 4 of Protein Aster-B	A0A1D5RLT6_MOUSE;A0A1L1SQ42_MOUSE;D3YWR0_MOUSE;ASTRB_MOUSE;ASTRB_MOUSE;ASTRB_MOUSE		160.183	124.807	99.2703	86.4619	177.996	135.469	118.896	109.725	126.566	156.996	88.4113	114.94	126.783	108.859	118.793	85.1919
Psme3ip1	Proteasome activator subunit 3 interacting protein 1 (Fragment);Proteasome activator subunit 3 interacting protein 1 (Fragment);Proteasome activator subunit 3 interacting protein 1 (Fragment);PSME3-interacting protein	A0A1D5RLU2_MOUSE;A0A1D5RLW0_MOUSE;A0A1D5RLX7_MOUSE;PIP30_MOUSE		188.389	253.691	199.069	143.556	148.061	144.692	139.402	121.235	165.856	156.497	156.747	156.805	141.836	131.574	242.221	221.058
Iws1	IWS1, SUPT6 interacting protein;Protein IWS1 homolog	A0A1D5RLV0_MOUSE;IWS1_MOUSE		57.5723	29.1394	55.9482	35.4902	50.2192	45.7516	37.8398	43.3872	29.0948	43.6079	25.31	34.4318	15.524	33.065	50.25	49.81
Unc80	Unc-80, NALCN activator;Protein unc-80 homolog	A0A1D5RLV3_MOUSE;UNC80_MOUSE		132.519	136.116	101.283	97.3363	133.543	137.472	107.247	117.417	69.9745	72.0304	57.229	57.5497	79.0606	85.9009	86.3043	81.4807
Myo9b	Myosin IXb;Myosin IXb;Myosin IXb;Myosin IXb;Myosin IXb;Unconventional myosin-IXb;Isoform 2 of Unconventional myosin-IXb;Isoform 3 of Unconventional myosin-IXb	A0A1D5RLW4_MOUSE;A0A8V5KX73_MOUSE;B9EHV1_MOUSE;E9PWZ6_MOUSE;E9PZW8_MOUSE;MYO9B_MOUSE;MYO9B_MOUSE;MYO9B_MOUSE		153.646	136.305	139.879	107.009	133.021	160.706	152.582	154.017	143.282	115.107	90.961	106.729	123.293	156.998	138.491	162.822
Slc38a7	Sodium-coupled neutral amino acid transporter 7 (Fragment);Sodium-coupled neutral amino acid transporter 7	A0A1D5RLX9_MOUSE;S38A7_MOUSE		NaN	NaN	67.2254	NaN	NaN	95.6604	NaN	136.395	NaN	NaN	74.2801	65.9903	NaN	NaN	155.287	225.846
Sipa1l2	Signal-induced proliferation-associated 1 like 2;Signal-induced proliferation-associated 1-like protein 2;Isoform 2 of Signal-induced proliferation-associated 1-like protein 2	A0A1D5RLY9_MOUSE;SI1L2_MOUSE;SI1L2_MOUSE		138.364	133.548	106.749	116.94	116.996	124.186	122.172	114.03	74.3313	77.7013	74.6479	80.1287	93.6927	95.0832	92.8818	88.839
Iqsec1	IQ motif and Sec7 domain 1	A0A1D5RM83_MOUSE		3683.32	3685.9	3427.11	3458.45	3750.23	3722.46	3739.07	3757.62	1012.65	1008.25	949.501	1031.83	1283.2	1221.09	1277.83	1242.17
Rpl18a	Large ribosomal subunit protein eL20 (Fragment);Large ribosomal subunit protein eL20	A0A1D5RM85_MOUSE;RL18A_MOUSE		1174.9	1175.44	664.612	660.483	1144.1	1206.69	723.097	762.991	722.512	713.199	472.67	519.696	1056.43	1093.64	670.08	721.525
Wwp2	E3 ubiquitin-protein ligase;E3 ubiquitin-protein ligase;E3 ubiquitin-protein ligase;NEDD4-like E3 ubiquitin-protein ligase WWP2	A0A1D5RM92_MOUSE;I3RSH5_MOUSE;Q3UJU3_MOUSE;WWP2_MOUSE		150.633	135.827	111.636	130.923	125.641	112.541	127.833	109.031	152.481	124.864	106.618	118.199	140.054	131.943	134.02	110.46
Mast3	non-specific serine/threonine protein kinase	A0A1D5RM97_MOUSE		858.201	869.689	823.815	852.166	813.772	852.521	827.521	873.663	609.185	613.791	658.132	665.132	645.931	618.914	655.804	659.841
Ccdc149	Coiled-coil domain containing 149 (Fragment);Coiled-coil domain containing 149	A0A1D5RM99_MOUSE;F6V035_MOUSE		59.2574	55.0635	47.9426	37.9125	65.439	66.0787	65.674	57.0618	64.5033	51.385	45.6579	57.083	70.2447	61.2631	52.068	37.9677
Dnmbp	Dynamin-binding protein	A0A1D5RMB5_MOUSE		123.037	116.933	100.841	110.557	95.2518	99.191	89.671	99.5964	72.8819	82.876	72.0162	82.3803	88.4341	95.9402	107.336	100.262
Zfp612	Zinc finger protein 612	A0A1D5RMC2_MOUSE		133.209	168.724	147.592	138.063	195.499	209.244	158.646	177.422	155.386	136.663	143.367	166.132	163.278	157.717	140.379	127.009
Agap3	ArfGAP with GTPase domain, ankyrin repeat and PH domain 3	A0A1D5RMG4_MOUSE		847.088	773.33	441.582	500.137	613.658	593.684	733.594	585.481	541.623	446.291	540.909	568.885	630.177	670.303	229.961	667.097
Stox2	Storkhead box 2;Storkhead-box protein 2;Isoform 2 of Storkhead-box protein 2;Isoform 3 of Storkhead-box protein 2	A0A1D5RMH0_MOUSE;STOX2_MOUSE;STOX2_MOUSE;STOX2_MOUSE		22.2963	61.0213	NaN	NaN	33.5875	NaN	43.5428	45.3791	41.3094	35.1804	36.3837	49.1046	NaN	NaN	28.9111	42.59
Psd3	Pleckstrin and Sec7 domain containing 3	A0A1D5RMH7_MOUSE		227.112	NaN	231.655	NaN	351.663	343.65	216.964	182.411	NaN	221.596	167.073	238.562	240.171	233.4	NaN	129.394
Pxn	Paxillin	A0A1D5RMM8_MOUSE;F8VQ28_MOUSE;PAXI_MOUSE		555.041	507.795	579.002	578.4	498.321	522.176	515.053	508.153	540.067	568.579	616.886	548.003	527.594	525.666	732.661	772.702
OTTMUSPWKG00059374;OTTMUSWSBG00059273;Irgm1;Irgm1;Irgm1;Irgm1;Irgm1	Irgm1;Immunity related GTPase family M member 1;Interferon-gamma-inducible GTPase Ifggd3 protein;Immunity-related GTPase family M protein 1;Isoform 2 of Immunity-related GTPase family M protein 1;Immunity-related GTPase family M member 1;Immunity related GTPase m1	A0A1G5SJJ3_MOUSE;A0A1G5SJL2_MOUSE;J7NUP1_MOUSE;IRGM1_MOUSE;IRGM1_MOUSE;U5NJN6_MUSMM;V9PVS1_MUSMC		68.6594	100.876	60.5445	73.3144	91.5617	76.0583	80.5844	72.7532	79.4689	77.7836	96.7197	106.112	88.8603	97.6892	75.4606	68.4031
OTTMUSCASG00059405;OTTMUSPWKG00059391;Slfn5	Schlafen family member 5 isoform 1;Schlafen family member 5;Schlafen family member 5	A0A1G5SJR4_MOUSE;A0A1G5SK44_MOUSE;SLFN5_MOUSE		69.2808	70.5001	36.107	51.3628	38.5288	51.1346	34.8951	39.5206	46.0071	38.3925	53.7363	49.9598	48.0585	46.367	67.9912	48.1072
Gatad2a	GATA zinc finger domain containing 2A;GATA zinc finger domain containing 2A;Transcriptional repressor p66 alpha	A0A1I7Q4G8_MOUSE;E9QMN5_MOUSE;P66A_MOUSE		133.163	113.613	111.365	111.669	116.555	131.787	106.396	112.83	109.55	146.541	129.033	117.154	117.764	95.2312	127.219	125.827
Zranb1	ubiquitinyl hydrolase 1;Ubiquitin thioesterase Zranb1	A0A1L1SQ24_MOUSE;ZRAN1_MOUSE		74.2143	55.5438	62.1891	64.7148	73.594	91.9595	56.7585	54.894	73.757	73.8582	48.8239	65.5186	60.9066	58.2202	74.3194	49.8522
Tln2	Talin 2	A0A1L1SQ51_MOUSE;E9PUM4_MOUSE		5153.92	5162.59	5078.59	5122.36	4666.67	4585.3	4808.74	4798.79	4348.09	4327.17	4581.38	4614.98	4574.67	4597.3	4960.02	4993.59
Dock6	Dedicator of cytokinesis 6;Dedicator of cytokinesis protein 6	A0A1L1SQR4_MOUSE;DOCK6_MOUSE		31.9461	31.0007	11.9936	28.3669	NaN	19.3842	27.1618	23.0594	20.2712	18.9678	NaN	18.4156	36.9801	29.0503	40.4132	26.5597
Olfm2	Olfactomedin 2;Olfactomedin 2;Noelin-2	A0A1L1SQX6_MOUSE;A0A1L1SV46_MOUSE;NOE2_MOUSE		139.717	135.314	101.253	118.309	105.73	108.33	111.733	107.653	105.742	120.989	98.4392	113.831	76.8274	92.2487	110.337	101.628
Higd1a	HIG1 domain family, member 1A (Fragment);HIG1 domain family, member 1A (Fragment);HIG1 domain family, member 1A (Fragment);HIG1 domain family, member 1A;HIG1 domain family, member 1A;HIG1 domain family member 1A, mitochondrial	A0A1L1SR69_MOUSE;A0A1L1ST61_MOUSE;A0A1L1SV00_MOUSE;Q1XG81_MOUSE;Q8R472_MOUSE;HIG1A_MOUSE		44.2968	19.6841	11.9943	24.8944	15.1505	23.5808	6.92576	18.4265	14.0003	17.8393	10.9366	7.7976	30.3283	45.1344	28.4665	32.7961
Hhatl	Hedgehog acyltransferase-like (Fragment);Hedgehog acyltransferase-like (Fragment);Protein-cysteine N-palmitoyltransferase HHAT-like protein	A0A1L1SR86_MOUSE;A0A1L1SRJ1_MOUSE;HHATL_MOUSE		23.2009	18.3262	45.012	32.8169	23.2025	26.7218	36.3912	32.5118	11.9944	30.6774	27.886	38.317	48.3028	25.7636	15.5181	13.2292
Ano8	Anoctamin;Anoctamin-8	A0A1L1SR96_MOUSE;ANO8_MOUSE		116.869	142.709	89.4084	89.7236	88.8652	85.1978	110.055	92.6352	124.324	104.845	127.655	133.475	133.197	126.342	127.531	112.525
Ldlr	Low-density lipoprotein receptor	A0A1L1SRE8_MOUSE;LDLR_MOUSE;Q3TDD1_MOUSE;Q3TVR4_MOUSE;Q3U8R7_MOUSE;Q8VCT0_MOUSE;Q91ZJ1_MOUSE		37.9521	47.8798	44.8476	36.8281	28.4296	26.0595	31.5809	31.3483	48.8602	36.3315	36.2943	41.1275	40.6542	36.7246	38.9533	37.1183
Cdkn2d	Cyclin dependent kinase inhibitor 2D (Fragment);Uncharacterized protein (Fragment);Cyclin-dependent kinase 4 inhibitor D	A0A1L1SRJ2_MOUSE;Q3US51_MOUSE;CDN2D_MOUSE		NaN	36.1748	26.8483	10.0078	NaN	NaN	16.2968	NaN	24.4323	37.61	NaN	8.50857	NaN	NaN	33.7377	NaN
Cmtm7	CKLF-like MARVEL transmembrane domain containing 7;MARVEL domain-containing protein;CKLF-like MARVEL transmembrane domain-containing protein 7;Isoform 2 of CKLF-like MARVEL transmembrane domain-containing protein 7	A0A1L1SRR1_MOUSE;Q3THH0_MOUSE;CKLF7_MOUSE;CKLF7_MOUSE		38.1306	17.2154	11.3082	21.767	7.30856	NaN	17.9492	34.754	22.84	16.354	10.0189	13.4481	25.209	23.3049	39.392	46.8044
Cnn1	Calponin;Calponin;Calponin-1;Isoform Beta of Calponin-1;Calponin	A0A1L1SRV0_MOUSE;B2RSH3_MOUSE;CNN1_MOUSE;CNN1_MOUSE;Q8CBQ2_MOUSE		114.53	114.438	140.974	149.85	NaN	143.047	NaN	84.2063	115.141	124.255	94.2465	131.913	112.227	76.7143	88.1107	99.1514
Ampd3	AMP deaminase;AMP deaminase 3	A0A1L1SRX2_MOUSE;AMPD3_MOUSE		737.29	648.169	591.4	554.898	589.323	554.354	518.221	566.723	499.844	476.66	457.998	467.637	619.667	669.411	726.804	723.404
Gsta4	glutathione transferase (Fragment);Glutathione S-transferase A4	A0A1L1SS61_MOUSE;GSTA4_MOUSE		29.4351	44.349	37.491	32.5847	25.2093	29.5616	21.8273	16.6206	NaN	21.2645	45.367	39.85	38.0335	51.0076	46.0506	33.9583
Slc44a2	Choline transporter-like protein (Fragment)	A0A1L1SS87_MOUSE;A0A1L1SU40_MOUSE		27.8838	7.70189	17.4666	16.9475	6.1335	8.00604	5.96708	12.8453	NaN	4.62098	4.46311	5.14077	6.38302	9.958	5.82707	12.2425
Tmem205	Transmembrane protein 205 (Fragment);Transmembrane protein 205	A0A1L1SSA8_MOUSE;TM205_MOUSE		78.8065	134.602	108.4	55.7953	84.6025	65.5648	65.7339	96.0971	190.156	114.553	153.216	144.202	150.615	116.335	172.657	178.323
Lrrfip2	Leucine-rich repeat flightless-interacting protein 2	A0A1L1SSC0_MOUSE;A0A668KLE1_MOUSE		175.293	124.616	119.606	115.144	168.816	163.307	163.404	171.245	97.0568	114.971	111.845	94.2972	169.804	138.598	156.21	155.399
Adpgk	ADP-dependent glucokinase;ADP-dependent glucokinase;ADP-dependent glucokinase;ADP-dependent glucokinase;Isoform 3 of ADP-dependent glucokinase	A0A1L1SSF2_MOUSE;Q3TJ10_MOUSE;Q3UDS7_MOUSE;ADPGK_MOUSE;ADPGK_MOUSE		122.463	108.487	112.122	97.1141	126.763	98.2387	79.8632	86.174	94.0871	104.103	134.196	100.082	126.388	131.723	106.726	127.013
4931406C07Rik;	RIKEN cDNA 4931406C07 gene;Ester hydrolase C11orf54 homolog	A0A1L1SSF8_MOUSE;CK054_MOUSE		67.8762	74.8677	51.1456	56.02	57.2085	53.4995	59.0731	61.2695	77.6344	77.9122	59.6473	54.4488	48.9281	67.2665	61.4287	58.6627
Sparc	SPARC	A0A1L1SSH9_MOUSE;SPRC_MOUSE;Q5NCU4_MOUSE;Q5NCU5_MOUSE		598.447	578.864	615.202	619.886	484.95	443.952	473.832	485.828	509.173	567.399	498.825	500.135	623.409	610.973	740.594	697.616
Ncoa7	Nuclear receptor coactivator 7;Ncoa7 protein	A0A1L1SSS4_MOUSE;B9EIW5_MOUSE		559.247	596.668	548.541	575.306	615.381	574.99	537.66	553.318	631.031	646.162	616.702	603.241	627.519	604.502	588.788	563.135
Clasp2	CLIP associating protein 2	A0A1L1ST22_MOUSE		100.232	98.3109	71.4588	77.5862	132.243	87.9296	86.9462	99.1686	67.5532	73.5711	76.565	68.7998	75.8087	97.2533	108.692	NaN
Gm49337;;;Pik3r3	Predicted gene, 49337;SH2 domain-containing protein;SH2 domain-containing protein;Phosphatidylinositol 3-kinase regulatory subunit gamma	A0A1L1ST33_MOUSE;Q3TST3_MOUSE;Q3UXE9_MOUSE;P55G_MOUSE		204.619	75.3158	76.4755	81.0578	75.8177	462.4	126.629	79.7084	51.1068	230.928	62.6559	57.0292	NaN	78.6447	92.2583	72.5407
Cdc37	Hsp90 co-chaperone Cdc37 (Fragment)	A0A1L1STC0_MOUSE		42.9784	144.388	102.549	99.7386	145.267	78.7328	70.1579	72.4686	60.5709	63.9631	57.0348	75.3318	43.3595	57.9827	74.718	75.7528
Syne1	Spectrin repeat containing, nuclear envelope 1	A0A1L1STC6_MOUSE		NaN	NaN	NaN	NaN	54.4063	34.3686	NaN	37.1535	NaN	NaN	53.0076	13.1974	58.9285	65.1686	55.1975	59.2251
Ilf3	Interleukin enhancer binding factor 3;Nuclear factor 90;Isoform 2 of Interleukin enhancer-binding factor 3;Isoform 3 of Interleukin enhancer-binding factor 3	A0A1L1STE4_MOUSE;Q45VK6_MOUSE;ILF3_MOUSE;ILF3_MOUSE		782.95	814.065	625.203	665.53	846.011	891.246	704.865	695.762	675.061	662.263	611.782	638.632	777.398	790.477	653.063	656.219
Mindy2	Ubiquitin carboxyl-terminal hydrolase;Ubiquitin carboxyl-terminal hydrolase MINDY-2	A0A1L1STF0_MOUSE;MINY2_MOUSE		675.149	654.929	633.387	727.807	614.118	678.192	647.04	640.324	665.719	681.932	735.459	747.073	753.998	764.619	789.49	786.141
Ubl7	Ubiquitin-like 7 (bone marrow stromal cell-derived) (Fragment)	A0A1L1STF2_MOUSE		NaN	NaN	NaN	NaN	NaN	NaN	NaN	NaN	79.1518	138.633	NaN	NaN	57.971	58.5265	NaN	NaN
Gdpd5	Glycerophosphodiester phosphodiesterase domain containing 5;Glycerophosphodiester phosphodiesterase domain-containing protein 5	A0A1L1STK0_MOUSE;GDPD5_MOUSE		356.402	389.629	423.089	427.355	315.741	291.508	251.117	268.767	265.498	292.148	294.405	286.692	315.472	302.62	235.384	248.296
Dnajc13	DnaJ heat shock protein family (Hsp40) member C13 (Fragment)	A0A1L1STR9_MOUSE		84.246	63.9025	37.1843	50.2602	61.3773	NaN	61.1231	NaN	40.5794	43.2872	NaN	NaN	NaN	71.8753	78.9875	89.8847
Slc37a4	Solute carrier family 37 (glucose-6-phosphate transporter), member 4;Solute carrier family 37 (glucose-6-phosphate transporter), member 4 (Fragment);Solute carrier family 37 (Glucose-6-phosphate transporter), member 4;Putative glycogen storage disease type 1b protein	A0A1L1SUI3_MOUSE;A0A1L1SUV7_MOUSE;Q9D1F9_MOUSE;Q9Z295_MOUSE		NaN	NaN	NaN	NaN	109.052	190.609	NaN	NaN	NaN	NaN	185.991	122.431	95.6476	121.391	96.2607	124.757
Map7	Microtubule-associated protein 7 (Fragment)	A0A1L1SUN4_MOUSE		537.704	612.078	350.612	311.428	415.288	412.064	303.413	433.714	445.743	611.126	415.484	371.248	555.763	697.617	430.781	460.345
Arhgef12	Rho guanine nucleotide exchange factor (GEF) 12 (Fragment)	A0A1L1SUP5_MOUSE		NaN	119.677	116.884	102.883	143.379	123.076	88.4463	168.094	117.306	114.755	117.314	123.077	92.016	145.522	NaN	NaN
Picalm	Phosphatidylinositol binding clathrin assembly protein (Fragment)	A0A1L1SUR7_MOUSE		85.192	76.8236	58.9428	67.0735	56.0844	58.6342	75.5478	63.1328	103.674	55.8306	66.9371	62.3479	104.663	114.217	64.6177	62.3056
Thy1	Thy-1 membrane glycoprotein (Fragment);Thy-1 membrane glycoprotein;Thy-1 membrane glycoprotein	A0A1L1SUX8_MOUSE;THY1_MOUSE;Q53YX2_MOUSE		2887.79	3071.45	2093.2	2038.27	2142.52	1968.7	1969.67	2026.82	2711.94	2390.12	2355.91	2508.12	2769.5	2733.73	2932.91	2933.7
Usp47	Ubiquitin carboxyl-terminal hydrolase 47	A0A1L1SV73_MOUSE		4737.75	4701.2	4896.15	4934.68	4922.77	4932.45	4897.19	4879.67	4501.77	4524.19	4712.79	4701.73	4440.28	4606.94	4906.89	4954.35
Slc44a2	Choline transporter-like protein;Isoform 2 of Choline transporter-like protein 2	A0A1L1SVG6_MOUSE;CTL2_MOUSE		182.363	251.534	110.715	126.312	146.014	141.792	81.7536	74.1663	93.6541	89.9239	98.736	108.249	127.676	131.314	94.824	87.3196
Actn4	Actinin alpha 4 (Fragment)	A0A1L1SVJ6_MOUSE		351.975	386.699	424.009	457.133	498.013	463.778	454.367	530.564	390.019	367.222	513.136	560.526	375.73	354.054	397.657	288.015
Nur77;Nur77;Nr4a1;Nr4a1	NUR77-2;NUR77-1;Nuclear receptor subfamily 4 group A member 1;Nr4a1 protein	A0A1Q1MKH5_MOUSE;A0A1Q1MKI1_MOUSE;NR4A1_MOUSE;Q545Q1_MOUSE		NaN	NaN	48.9631	59.8947	39.7803	56.7368	38.4313	29.9793	21.4349	14.8776	8.29954	NaN	22.779	36.9282	NaN	NaN
Klk1b26;Egfbp2;Egfbp2;Klk1b26	Kallikrein a5;Prorenin-converting enzyme (MK13b);Epidermal growth factor-binding protein type B;Kallikrein 1-related peptidase b26	A0A1R3UDC2_MOUSE;O88309_MOUSE;EGFB2_MOUSE;K1B26_MOUSE		NaN	262.043	106.376	113.587	NaN	NaN	26.906	26.0149	90.3748	85.6324	NaN	92.2606	78.8849	NaN	428.821	539.641
Mff	Mitochondrial fission factor	A0A1S6GWF9_MOUSE;A0A1S6GWG0_MOUSE;E0CYB9_MOUSE;MFF_MOUSE		249.41	247.486	189.015	197.748	155.498	201.311	158.116	172.012	200.186	171.843	177.261	179.799	186.252	178.659	143.39	144.481
Rit1	GTP-binding protein Rit1;Ras-like without CAAX 1;GTP-binding protein Rit1	A0A1S6GWG2_MOUSE;E9Q672_MOUSE;RIT1_MOUSE		172.067	164.444	137.705	143.223	122.263	121.306	144.037	107.627	119.402	109.642	130.713	105.558	113.896	107.047	122.418	108.873
Mrps9	28S ribosomal protein S9, mitochondrial;Small ribosomal subunit protein uS9m	A0A1S6GWG5_MOUSE;RT09_MOUSE		209.858	210.008	155.506	168.605	153.818	154.463	144.288	145.335	230.708	244.92	190.323	182.041	175.404	187.184	166.704	186.404
Atp6v1b2	Vacuolar proton pump subunit B;V-type proton ATPase subunit B, brain isoform	A0A1S6GWG6_MOUSE;VATB2_MOUSE		42098.5	41477.9	37447	37314.3	45640.4	47017.3	41328.9	42221.8	43830.5	43512.2	43978.8	43718.7	42558.6	43024.6	36708.1	37301.6
Dnaja4	DnaJ homolog subfamily A member 4	A0A1S6GWG7_MOUSE;A0A1S6GWG8_MOUSE;DNJA4_MOUSE		1412.58	1391.65	1448.36	1474.61	1416.95	1443.74	1304.86	1312.39	680.415	674.056	785.946	783.917	831.668	819.825	902.608	844.196
Man2c1	alpha-mannosidase;alpha-mannosidase;Alpha-mannosidase 2C1	A0A1S6GWG9_MOUSE;Q8BWY6_MOUSE;MA2C1_MOUSE		4113.58	4213.61	4702.47	4788.59	4766.04	4858.75	4866.85	4898.54	4207.38	4151.77	5044.63	4943.56	4640.09	4631.92	5142.39	4885.89
Gabarap	Gamma-aminobutyric acid receptor-associated protein	A0A1S6GWH0_MOUSE;GBRAP_MOUSE		95.1822	45.3468	69.1456	95.3727	112.952	96.5439	160.437	155.587	82.0421	59.2782	86.492	66.1053	159.346	135.807	80.6352	29.5499
Birc6	UBC core domain-containing protein;UBC core domain-containing protein;Baculoviral IAP repeat-containing protein 6	A0A1S6GWH3_MOUSE;A0A1S6GWH6_MOUSE;BIRC6_MOUSE		1343.86	1323.6	1273.36	1239.23	1383.66	1363.85	1351.76	1351.7	1357.2	1381.56	1328.52	1327.74	1187.88	1200.26	1305.27	1307.3
Nsun2	tRNA (cytosine(34)-C(5))-methyltransferase;RNA cytosine C(5)-methyltransferase NSUN2	A0A1S6GWH4_MOUSE;NSUN2_MOUSE		841.909	823.444	828.73	862.515	844.727	820.295	883.421	865.392	868.176	831.573	898.9	894.17	815.865	788.079	901.595	861.551
Uba1	Ubiquitin-like modifier-activating enzyme 1	A0A1S6GWH5_MOUSE		13672.6	13542.9	13205.3	13317.7	15655.9	15526.7	14465.7	14383.2	15159.7	15241.6	15450.4	15466.4	15318	15625.2	14763.2	15032.1
Ncbp2	Nuclear cap-binding protein subunit 2	A0A1S6GWH8_MOUSE;A0A1S6GWH9_MOUSE;NCBP2_MOUSE		370.245	421.149	391.448	435.473	441.9	389.889	436.203	397.165	356.706	351.358	488.386	425.441	450.348	470.274	368.701	411.645
Psmf1	Proteasome inhibitor PI31 subunit;Proteasome inhibitor PI31 subunit;Proteasome inhibitor PI31 subunit (Fragment);Proteasome inhibitor PI31 subunit	A0A1S6GWI1_MOUSE;A2AU35_MOUSE;A2VCP7_MOUSE;PSMF1_MOUSE		179.029	226.64	161.871	161.873	185.876	205.547	177.338	181.573	181.383	185.637	190.892	182.254	177.43	179.422	190.085	225.936
Ndufs5	NADH dehydrogenase [ubiquinone] iron-sulfur protein 5;NADH dehydrogenase [ubiquinone] iron-sulfur protein 5 (Fragment);NADH dehydrogenase [ubiquinone] iron-sulfur protein 5	A0A1S6GWI4_MOUSE;B1ARW4_MOUSE;NDUS5_MOUSE		NaN	NaN	54.9816	37.6385	46.4792	NaN	25.8005	NaN	43.6741	NaN	NaN	NaN	99.4873	86.7714	86.3235	85.079
Rtca;Rtca;RtcA	RNA 3'-terminal phosphate cyclase	A0A1S6GWI5_MOUSE;Q3TIJ4_MOUSE;RTCA_MOUSE		916.959	952.501	929.727	974.272	1065.12	1089.64	968.856	1040.09	807.135	818.901	874.128	886.171	1061.16	1018.27	1037.3	989.739
Exosc3	Ribosomal RNA-processing protein 40;Exosome complex component RRP40	A0A1S6GWI6_MOUSE;EXOS3_MOUSE		189.012	173.946	139.717	171.307	230.702	184.328	175.545	151.372	203.842	172.388	141.273	158.335	197.659	193.676	210.759	187.093
Lrpap1	Alpha-2-macroglobulin receptor-associated protein;Alpha-2-macroglobulin receptor-associated protein;Alpha-2-macroglobulin receptor-associated protein;Low density lipoprotein receptor-related protein associated protein 1;Lrpap1 protein (Fragment);Lrpap1 protein (Fragment);Lrpap1 protein (Fragment);Low density lipoprotein receptor-associated protein 1;Lrpap1 protein (Fragment)	A0A1S6GWI9_MOUSE;AMRP_MOUSE;Q3TL96_MOUSE;Q52KI7_MOUSE;Q5D0B0_MOUSE;Q6PB52_MOUSE;Q6PEM5_MOUSE;Q6ZY49_MOUSE;Q8K295_MOUSE		109.497	99.9476	90.9676	115.523	161.403	100.716	130.704	128.373	93.8976	106.352	115.398	114.71	132.42	135.707	86.4606	98.4578
Ints2	Integrator complex subunit 2	A0A1S6GWJ5_MOUSE;Q148R8_MOUSE;INT2_MOUSE		24.1911	17.7704	16.8094	9.46095	17.6276	14.3071	8.52359	13.1117	11.716	14.6003	6.76875	10.6225	9.74529	14.3528	11.6881	18.267
Pi4ka	1-phosphatidylinositol 4-kinase;Phosphatidylinositol 4-kinase alpha	A0A1S6GWJ7_MOUSE;PI4KA_MOUSE		1473.17	1502.77	1303.18	1294.63	1307.56	1293.07	1256.72	1250.58	1099.21	1099.15	1155.8	1155.99	1270.97	1272.94	1253.35	1245.92
Hnrnpm	RRM domain-containing protein;RRM domain-containing protein;MKIAA4193 protein (Fragment);Heterogeneous nuclear ribonucleoprotein M;Isoform 2 of Heterogeneous nuclear ribonucleoprotein M	A0A1S6GWJ8_MOUSE;Q3THB3_MOUSE;Q570Z0_MOUSE;HNRPM_MOUSE;HNRPM_MOUSE		1749.94	1699.54	1294.35	1297.79	1293.46	1352.36	1013.09	1048.99	1031.56	1008.41	800.024	857.394	1503.36	1445.88	1223.39	1185.68
Tsfm	Elongation factor Ts, mitochondrial;Elongation factor Ts, mitochondrial;Tsfm protein (Fragment);Translation elongation factor (Fragment);Elongation factor Ts, mitochondrial;Elongation factor Ts, mitochondrial	A0A1S6GWJ9_MOUSE;Q3TA37_MOUSE;Q8K239_MOUSE;Q8VDE3_MOUSE;Q9CX33_MOUSE;EFTS_MOUSE		19.1037	37.6631	26.9341	30.1394	15.754	NaN	NaN	20.9138	27.9779	27.6521	27.5539	22.685	11.0012	16.0875	41.4117	40.9969
Paxbp1	GCF C-terminal domain-containing protein;PAX3- and PAX7-binding protein 1	A0A1S6GWK5_MOUSE;PAXB1_MOUSE		72.2085	63.5455	38.782	53.2185	63.5166	48.8947	68.0665	58.0842	80.0371	62.8411	62.2303	58.6048	62.604	82.0645	56.3659	68.2101
Nfat5	Nuclear factor of activated T cells 5;Nuclear factor of activated T-cells 5;Isoform 2 of Nuclear factor of activated T-cells 5;Isoform 4 of Nuclear factor of activated T-cells 5	A0A1U6URG8_MOUSE;NFAT5_MOUSE;NFAT5_MOUSE;NFAT5_MOUSE		350.198	358.204	238.669	248.131	345.606	355.03	313.909	326.893	344.526	326.087	270.279	275.163	296.054	289.869	320.881	332.104
Samd3	Sterile alpha motif domain containing 3 (Fragment);Sterile alpha motif domain containing 3;Sterile alpha motif domain-containing protein 3	A0A1W2P6I4_MOUSE;E9Q3G4_MOUSE;SAMD3_MOUSE		NaN	70.2589	82.2695	56.3415	81.9733	73.157	95.1274	83.9405	72.2646	129.141	70.8458	93.5412	53.7028	55.2271	134.666	94.2195
Ascc3	Activating signal cointegrator 1 complex subunit 3 (Fragment);Activating signal cointegrator 1 complex subunit 3	A0A1W2P6I6_MOUSE;ASCC3_MOUSE		39.0309	29.6867	NaN	23.3268	33.7085	37.0181	42.2476	NaN	29.833	29.853	30.4791	NaN	NaN	52.0792	16.5353	23.0543
Dapk3	Death-associated protein kinase 3 (Fragment);Death-associated protein kinase 3 (Fragment);Death-associated protein kinase 3;Death-associated protein kinase 3	A0A1W2P6J6_MOUSE;A0A1W2P6K3_MOUSE;DAPK3_MOUSE;Q05A21_MOUSE		NaN	NaN	53.1443	54.5829	116.967	150.43	NaN	75.1941	69.1303	NaN	NaN	NaN	113.569	NaN	NaN	NaN
Sgpp1	Sphingosine-1-phosphate phosphatase 1;Phosphatidic acid phosphatase type 2/haloperoxidase domain-containing protein;Sphingosine-1-phosphate phosphatase 1	A0A1W2P6K9_MOUSE;Q3UDY2_MOUSE;SGPP1_MOUSE		129.42	104.559	121.633	127.769	69.0207	74.0765	110.4	76.4267	110.792	132.909	149.069	143.816	85.1697	99.0087	173.49	141.693
Pxdn	Peroxidasin;Peroxidasin homolog (Drosophila);Peroxidasin homolog;MKIAA0230 protein (Fragment)	A0A1W2P6L9_MOUSE;B2RX13_MOUSE;PXDN_MOUSE;Q80U60_MOUSE		52.3771	40.2438	44.8343	47.2278	34.0606	37.7479	33.7892	37.8276	40.8967	41.4953	28.318	41.3215	46.6264	40.298	55.1661	55.3326
Grik2	Glutamate receptor;Glutamate receptor (Fragment);Glutamate receptor (Fragment);Glutamate receptor ionotropic, kainate 2;Isoform GluR6-2 of Glutamate receptor ionotropic, kainate 2;Glutamate receptor, ionotropic, kainate 2 (beta 2)	A0A1W2P6S5_MOUSE;A3KMF0_MOUSE;A3KMF1_MOUSE;GRIK2_MOUSE;GRIK2_MOUSE;Q6PAQ0_MOUSE		33.7202	18.0263	11.1984	17.0368	17.8346	NaN	14.2491	16.2784	20.3794	NaN	12.1008	26.7291	16.5298	36.8869	22.2446	16.4503
1500009L16Rik;	RIKEN cDNA 1500009L16 gene (Fragment);Overexpressed in colon carcinoma 1 protein homolog	A0A1W2P6X0_MOUSE;OCC1_MOUSE		24.5331	NaN	25.3324	26.5439	9.55617	22.9435	6.78021	17.6099	19.193	25.1794	24.0427	18.9595	15.2164	17.2107	18.752	23.9791
Fmnl1	Formin-like 1;Formin-like protein 1	A0A1W2P6X3_MOUSE;FMNL1_MOUSE		848.174	855.477	864.847	850.897	988.724	1020.36	906.661	937.128	977.626	1021.61	1011.86	1028.12	893.183	850.949	892.288	845.882
Csrp2	Cysteine and glycine-rich protein 2 (Fragment);Cysteine and glycine-rich protein 2;Cysteine and glycine-rich protein 2;Cysteine and glycine-rich protein 2;Cysteine and glycine-rich protein 2	A0A1W2P758_MOUSE;A0A1W2P845_MOUSE;CSRP2_MOUSE;Q71V27_MOUSE;Q9D1M8_MOUSE		58.5363	66.6823	54.9115	59.9718	20.7256	86.1781	52.1751	50.994	43.4609	70.3955	34.282	58.731	69.5353	37.5983	55.0304	42.4925
H3c14;Hist1h3e;Hist1h3i;Hist2h3b;H3f3a;H3-5;H3c1;H3c2;H3-3a	H3 clustered histone 14;Histone H3 (Fragment);Histone H3 (Fragment);Histone H3;Histone H3;Histone H3.3C;Histone H3.1;Histone H3.2;Histone H3.3	A0A1W2P768_MOUSE;A1L0U3_MOUSE;A1L0V4_MOUSE;B9EI85_MOUSE;F8WI35_MOUSE;H3C_MOUSE;H31_MOUSE;H32_MOUSE;H33_MOUSE		241.05	339.22	128.058	131.724	242.767	185.691	140.103	142.113	357.016	318.508	236.619	337.896	189.882	222.612	NaN	74.3746
Atp2b1	ATPase, Ca++ transporting, plasma membrane 1 (Fragment)	A0A1W2P772_MOUSE		337.794	343.745	307.901	285.345	186.059	161.753	170.595	185.456	188.042	175.873	187.195	209.229	267.177	238.828	346.688	326.97
Kcnc2	Potassium voltage gated channel, Shaw-related subfamily, member 2;Potassium voltage-gated channel subfamily C member 2	A0A1W2P796_MOUSE;KCNC2_MOUSE		34.1705	29.2051	22.8144	32.118	34.3536	27.6364	30.1254	27.3219	66.9076	30.5621	33.9253	33.9304	43.9777	19.0191	NaN	NaN
Coq10a	Coenzyme Q10A	A0A1W2P7G5_MOUSE;A0A1W2P7J1_MOUSE;E9Q3H6_MOUSE		75.009	56.4303	75.3442	70.5828	45.9262	82.1505	50.9619	50.9648	35.7923	42.1937	29.4405	43.1098	48.4409	32.3535	76.3158	77.2505
Rab3ip	RAB3A interacting protein	A0A1W2P7K6_MOUSE		613.965	646.293	622.293	631.099	600.655	576.824	622.645	575.162	593.136	572.885	625.44	586.525	598.901	654.417	651.319	633.272
Mthfd1	C-1-tetrahydrofolate synthase, cytoplasmic (Fragment)	A0A1W2P7L5_MOUSE		NaN	55.0232	44.2962	45.8254	NaN	44.3707	55.848	28.916	51.858	NaN	68.6173	70.985	57.8206	54.8056	41.2385	27.6562
Tmem19	Transmembrane protein 19;Transmembrane protein 19;Transmembrane protein 19;Isoform 2 of Transmembrane protein 19	A0A1W2P7P6_MOUSE;A0A1W2P7R5_MOUSE;TMM19_MOUSE;TMM19_MOUSE		199.189	191.157	254.696	280.55	242.307	184.286	170.106	194.957	177.598	290.192	247.535	278.156	331.669	247.567	276.506	266.214
Xpot	Exportin-T	A0A1W2P7Q6_MOUSE		2448.72	2466.96	2500.6	2550.01	2439.27	2482.92	2488.26	2524.62	2555.16	2567.91	2571.38	2588.91	2442.9	2400.66	2812.56	2693.07
Abracl	Costars family protein ABRACL (Fragment);Costars family protein ABRACL;Costars family protein ABRACL	A0A1W2P7X0_MOUSE;E9QMV2_MOUSE;ABRAL_MOUSE		108.117	69.054	107.968	97.0628	106.435	130.134	93.7347	160.216	118.852	143.701	119.73	131.05	131.247	134.866	112.404	148.781
Ptprk	protein-tyrosine-phosphatase;protein-tyrosine-phosphatase;Receptor-type tyrosine-protein phosphatase kappa	A0A1W2P7Y1_MOUSE;B2RRF0_MOUSE;PTPRK_MOUSE		55.0362	84.6361	47.3923	56.8354	47.0527	50.9532	39.6446	39.7189	46.9198	41.5326	41.7333	40.7729	44.3417	52.8774	72.4672	60.5168
Nrcam	Neuronal cell adhesion molecule	A0A1W2P7Y9_MOUSE		68.6935	65.3413	66.4773	73.1874	54.4967	61.9229	71.1843	68.9684	72.0441	69.9093	60.4114	61.7953	52.7684	50.3103	243.889	264.461
Ralgapa1	Ral GTPase activating protein, alpha subunit 1;Garnl1 protein	A0A1W2P832_MOUSE;B7ZNA3_MOUSE		493.739	511.635	405.305	408.685	608	619.25	512.303	504.259	356.202	349.912	289.29	288.098	360.305	360.136	328.228	331.036
Ppp2r5e	Protein phosphatase 2, regulatory subunit B', epsilon (Fragment)	A0A1W2P838_MOUSE		109.735	64.9776	71.624	78.1731	62.2401	29.5653	64.1008	65.7737	96.2962	105.498	88.0779	111.588	31.7053	NaN	165.637	174.469
Nf1	Neurofibromin 1 (Fragment)	A0A1W2P863_MOUSE		NaN	5.40578	16.6225	13.8884	4.91287	5.41898	NaN	3.65416	14.5026	27.237	3.39961	NaN	NaN	3.21235	18.4051	23.647
Nova2	RNA-binding protein Nova-2;Isoform 2 of RNA-binding protein Nova-2	NOVA2_MOUSE		373.621	380.475	289.826	248.542	410.934	443.966	354.216	309.932	498.006	533.255	356.731	333.889	398.681	426.071	398.453	415.239
Palm	Paralemmin-1 (Fragment)	A0A1W2P879_MOUSE		431.975	240.005	216.965	311.841	219.048	196.114	220.671	221.302	369.356	346.541	389.236	118.989	259.535	338.922	233.444	173.405
Ppp1r36	Protein phosphatase 1, regulatory subunit 36;Protein phosphatase 1 regulatory subunit 36	A0A1W2P8A7_MOUSE;PPR36_MOUSE		240.427	339.145	401.745	358.131	281.975	295.061	313.396	282.046	306.076	331.004	459.891	408	400.848	381.484	229.661	215.399
Reep3	Receptor expression-enhancing protein;Receptor expression-enhancing protein 3	A0A1W2P8A8_MOUSE;REEP3_MOUSE		62.0207	66.1369	50.2821	51.2989	43.8447	51.9359	71.6801	66.5257	53.4423	56.7358	58.0079	64.3814	103.707	87.6236	68.4761	97.0291
Pik3cg	phosphatidylinositol-4,5-bisphosphate 3-kinase;phosphatidylinositol-4,5-bisphosphate 3-kinase;phosphatidylinositol-4,5-bisphosphate 3-kinase;phosphatidylinositol-4,5-bisphosphate 3-kinase;Phosphatidylinositol 4,5-bisphosphate 3-kinase catalytic subunit gamma isoform	A0A1W2P8F6_MOUSE;Q3UVA4_MOUSE;Q3V1C0_MOUSE;Q9EQL1_MOUSE;PK3CG_MOUSE		547.977	607.251	384.31	549.803	496.022	598.127	506.365	471.405	604.977	622.957	481.548	535.051	550.241	576.871	471.093	516.578
Tbca	Tubulin-specific chaperone A	A0A1Y7VJ48_MOUSE;TBCA_MOUSE;Q5I0U7_MOUSE		NaN	NaN	78.6162	93.4331	NaN	76.267	50.1925	103.781	71.9992	76.292	91.0638	99.3961	75.8526	70.7584	67.2519	74.3548
Rapgef5	Rap guanine nucleotide exchange factor (GEF) 5 (Fragment)	A0A1Y7VJI0_MOUSE		80.3808	45.7453	62.5238	45.156	69.308	78.8	81.4985	93.9057	NaN	36.194	NaN	72.2784	35.3672	52.7852	77.9082	72.4434
Ryr2	Ryanodine receptor 2, cardiac (Fragment)	A0A1Y7VJP1_MOUSE		1115.6	617.884	321.865	465.2	726.833	708.417	509.351	502.52	988.917	901.859	898.694	558.844	637.263	747.123	596.026	660.735
Wdcp	WD repeat and coiled-coil-containing protein;WD repeat and coiled-coil-containing protein;Isoform 2 of WD repeat and coiled-coil-containing protein	A0A1Y7VJP4_MOUSE;WDCP_MOUSE;WDCP_MOUSE		68.4268	67.2896	60.5036	58.2698	55.9334	77.3385	60.5968	71.6033	48.076	53.5969	45.3941	51.6356	69.7711	63.116	52.5724	47.3555
Sp4	Trans-acting transcription factor 4	A0A1Y7VJR5_MOUSE;K4DI62_MOUSE;Q6DFV2_MOUSE		71.6077	65.8625	61.5256	80.882	57.3121	64.7078	63.7758	64.2141	72.9048	73.287	59.8594	71.4154	69.1833	77.0561	127.956	89.1689
Fbln5	Fibulin-5	A0A1Y7VJW9_MOUSE;FBLN5_MOUSE		258.887	272.377	262.403	278.03	185.662	143.973	147.098	175.178	125.25	134.665	117.644	123.033	156.836	155.623	164.025	182.529
Zfp825	Zinc finger protein 825	A0A1Y7VK00_MOUSE;K7N5X2_MOUSE;Q91VL6_MOUSE		50.724	59.1797	61.3083	68.6768	48.4243	92.8679	41.612	65.3594	69.4966	44.9628	66.8005	61.0451	55.6766	61.7913	62.6117	42.6693
Ryr2	Ryanodine receptor 2, cardiac (Fragment)	A0A1Y7VK09_MOUSE		370.719	300.081	265.879	278.691	322.684	371.771	322.604	299.408	544.943	473.908	383.371	428.388	334.767	385.269	351.246	391.406
Isca2	Iron-sulfur cluster assembly 2 (Fragment);Iron-sulfur cluster assembly 2 homolog, mitochondrial	A0A1Y7VK19_MOUSE;ISCA2_MOUSE		110.325	119.692	94.4225	74.3454	84.8913	64.3083	67.0693	79.7107	111.275	119.09	110.076	106.761	75.2791	88.2384	127.805	150.031
Crppa	D-ribitol-5-phosphate cytidylyltransferase	A0A1Y7VK76_MOUSE;A0A1Y7VM96_MOUSE;ISPD_MOUSE		91.9735	108.404	100.223	88.7896	105.751	111.477	99.8207	86.5151	125.823	112.951	83.9864	96.9768	109.787	116.151	109.839	130.539
Map3k9	Mitogen-activated protein kinase kinase kinase;Mitogen-activated protein kinase kinase kinase 9	A0A1Y7VKX4_MOUSE;M3K9_MOUSE		152.131	172.097	180.257	189.409	236.585	201.384	164.204	174.847	158.984	167.003	189.315	170.128	170.162	167.067	172.919	186.333
Ddx24	ATP-dependent RNA helicase;DEAD box helicase 24;ATP-dependent RNA helicase;ATP-dependent RNA helicase;ATP-dependent RNA helicase (Fragment);ATP-dependent RNA helicase DDX24	A0A1Y7VKX7_MOUSE;A0A1Y7VLU4_MOUSE;F8WJA0_MOUSE;Q3U7R4_MOUSE;Q3UYV7_MOUSE;DDX24_MOUSE		11.1142	13.4204	17.4813	10.8369	23.897	10.1638	15.8215	12.4344	7.75589	3.95052	8.40745	12.621	5.37034	2.77022	9.03693	9.52807
Serpinb6b	Serine (or cysteine) peptidase inhibitor, clade B, member 6b;Serine (or cysteine) peptidase inhibitor, clade B, member 6b;NK13;Serpin domain-containing protein	A0A1Y7VLD5_MOUSE;F7B9A0_MOUSE;O08804_MOUSE;Q3TAM4_MOUSE		NaN	NaN	152.822	144.621	88.4627	114.382	NaN	124.1	164.484	192.345	NaN	NaN	152.536	99.4626	NaN	NaN
Cdk13	Cyclin-dependent kinase 13;Cyclin-dependent kinase 13;Isoform 2 of Cyclin-dependent kinase 13	A0A1Y7VLM0_MOUSE;CDK13_MOUSE;CDK13_MOUSE		48.8499	59.9821	42.8242	41.3954	30.534	67.073	48.759	38.8834	58.3161	53.846	35.3142	36.167	39.9207	49.0734	47.5945	52.1118
Lpin1	phosphatidate phosphatase;phosphatidate phosphatase;phosphatidate phosphatase;Phosphatidate phosphatase LPIN1;Isoform 2 of Phosphatidate phosphatase LPIN1	A0A1Y7VLN4_MOUSE;E9QKQ5_MOUSE;Q8CD95_MOUSE;LPIN1_MOUSE;LPIN1_MOUSE		632.708	693.262	716.948	655.359	663.182	679.118	614.127	659.655	537.368	614.883	644.166	604.252	687.175	700.194	588.603	563.244
Atp5mj;Atp5mpl	ATP synthase membrane subunit 6.8PL (Fragment);ATP synthase subunit ATP5MPL, mitochondrial	A0A1Y7VLP0_MOUSE;ATP68_MOUSE		137.22	81.9138	24.9725	18.2407	NaN	NaN	NaN	NaN	9.40092	NaN	NaN	NaN	20.7007	9.82181	52.482	52.484
Togaram1	TOG array regulator of axonemal microtubules 1;Fam179b protein;Fam179b protein;TOG array regulator of axonemal microtubules protein 1;Isoform 2 of TOG array regulator of axonemal microtubules protein 1	A0A1Y7VLS3_MOUSE;B2RXS2_MOUSE;B2RXW9_MOUSE;TGRM1_MOUSE;TGRM1_MOUSE		41.266	29.29	33.0513	29.1158	33.6997	43.2621	36.3079	42.2177	29.1413	18.8047	29.1857	24.4363	12.0379	21.7896	24.021	21.1756
Kidins220	Kinase D-interacting substrate 220;Kinase D-interacting substrate 220;Kidins220 protein;Kinase D-interacting substrate 220	A0A1Y7VME9_MOUSE;A0A1Y7VMH7_MOUSE;B2RXL7_MOUSE;E9Q9B7_MOUSE		38.3117	111.948	52.8536	52.5838	73.0702	100.169	60.019	66.7775	59.3158	43.2374	25.0486	52.0597	53.0983	85.5972	64.3958	68.7688
Dhrs7	Dehydrogenase/reductase (SDR family) member 7 (Fragment);Dehydrogenase/reductase SDR family member 7	A0A1Y7VN19_MOUSE;DHRS7_MOUSE		375.062	368.237	362.879	347.846	270.246	247.069	282.258	276.015	313.03	294.935	365.937	345.869	389.666	357.492	354.042	332.471
Glrx5	Glutaredoxin 5;Glutaredoxin-related protein 5, mitochondrial	A0A1Y7VN70_MOUSE;GLRX5_MOUSE		504.236	473.761	483.277	533.139	318.446	318.078	428.277	350.742	547.815	580.454	548.259	476.916	384.566	391.154	526.075	534.518
Cinp	Cyclin-dependent kinase 2 interacting protein;2810452K22Rik protein;Cyclin-dependent kinase 2-interacting protein	A0A1Y7VN75_MOUSE;Q8VDH2_MOUSE;CINP_MOUSE		91.3743	NaN	72.1729	78.2185	158.314	122.546	116.084	148.225	106.467	85.813	150.224	100.983	136.933	113.885	46.326	50.3485
Atg2b	Autophagy related 2B (Fragment)	A0A1Y7VNP1_MOUSE		194.216	379.297	533.361	443.053	448.735	594.778	182.491	461.238	503.445	510.231	510.853	348.382	423.961	400.733	491.993	560.789
Ptpn21	protein-tyrosine-phosphatase (Fragment);Tyrosine-protein phosphatase non-receptor type;protein-tyrosine-phosphatase (Fragment);Tyrosine-protein phosphatase non-receptor type;Tyrosine-protein phosphatase non-receptor type 21	A0A1Y7VNU2_MOUSE;G5E8J4_MOUSE;Q05DI4_MOUSE;Q4KML9_MOUSE;PTN21_MOUSE		55.0885	46.0432	41.7798	35.0059	28.0843	25.2968	29.8872	33.2645	32.5377	28.2102	NaN	11.5666	25.3921	26.9895	37.5508	31.5162
Dcaf4	DDB1 and CUL4 associated factor 4	A0A1Y7VNZ0_MOUSE;Q99LF7_MOUSE		90.2553	77.445	75.4465	77.1542	80.1151	79.7982	76.1967	66.3496	65.1739	78.6209	68.6949	81.6958	58.4823	74.5461	68.4566	89.3342
Mark3	non-specific serine/threonine protein kinase	A0A1Y7VNZ6_MOUSE		238.919	202.757	157.262	159.916	139.042	70.4364	138.336	178.937	160.612	168.34	130.803	177.587	162.703	259.331	117.656	124.422
Crhbp	Corticotropin-releasing factor-binding protein	A0A217FL62_MOUSE;Q3UY07_MOUSE;CRHBP_MOUSE		147.739	157.227	135.151	135.964	162.243	164.984	151.625	142.22	195.735	203.519	146.452	175.348	175.858	161.006	198.445	209.327
Mboat2	Membrane bound O-acyltransferase domain containing 2;Lysophospholipid acyltransferase 2;Isoform 2 of Lysophospholipid acyltransferase 2	A0A217FL69_MOUSE;MBOA2_MOUSE;MBOA2_MOUSE		65.7246	77.9781	40.566	58.1562	73.3895	73.7766	52.1697	57.7643	61.1387	54.6431	64.0302	79.51	65.1131	70.6403	62.3213	58.5454
Camk2g	Calcium/calmodulin-dependent protein kinase II gamma (Fragment)	A0A286YCB8_MOUSE		463.658	553.657	623.498	639.221	515.036	448.551	637.996	482.011	40.7321	65.9438	39.0369	28.3827	50.5854	39.2234	59.2692	54.3891
Ppp6r3	Protein phosphatase 6, regulatory subunit 3 (Fragment)	A0A286YCG3_MOUSE		111.207	117.263	117.984	151.887	107.182	120.064	116.428	145.343	26.3637	57.6017	115.514	137.42	109.467	91.9633	179.557	160.456
Sorbs1	Sorbin and SH3 domain containing 1	A0A286YCI8_MOUSE		334.713	345.297	308.73	322.276	359.63	390.268	345.872	375.728	226.988	227.583	232.681	249.249	240.543	262.833	270.298	277.447
Slc4a7	Anion exchange protein;Anion exchange protein;Anion exchange protein;Anion exchange protein;Anion exchange protein (Fragment);Anion exchange protein;Anion exchange protein;Anion exchange protein;Anion exchange protein;Anion exchange protein;Anion exchange protein;Anion exchange protein;Anion exchange protein;Anion exchange protein;Anion exchange protein;Anion exchange protein;Anion exchange prote…	A0A286YCS4_MOUSE;A0A286YCX2_MOUSE;A0A286YCX8_MOUSE;A0A286YD46_MOUSE;A0A286YDJ7_MOUSE;A0A286YDK8_MOUSE;D3Y272_MOUSE;D3Y273_MOUSE;E3UVT8_MOUSE;E3UVT9_MOUSE;F8VQC9_MOUSE;H6WZ45_MOUSE;H6WZF5_MOUSE;I1VGT4_MOUSE;I1VGT5_MOUSE;I1VGT6_MOUSE;J7H931_MOUSE;J9RDH0_MOUSE;J9RV59_MOUSE;J9RZB2_MOUSE;J9S4N6_MOUSE;J9S7F7_MOUSE;S4A7_MOUSE;U3RF68_MOUSE;U3RKD2_MOUSE		51.332	40.0338	NaN	13.2297	15.3237	28.0578	20.7657	12.121	15.4849	36.2582	14.7186	13.1302	17.7283	21.8674	35.2254	28.5762
Epb41l3	Erythrocyte membrane protein band 4.1 like 3 (Fragment)	A0A286YCT6_MOUSE		119.123	90.0927	102.765	92.3673	91.4637	88.7591	153.724	116.432	198.644	190.062	146.74	163.68	139.621	146.792	233.872	242.55
Atp9b	Phospholipid-transporting ATPase	A0A286YCV0_MOUSE;D3YV00_MOUSE		229.663	241.163	191.221	202.983	224.129	215.655	200.21	198.204	196.234	200.575	224.713	208.073	217.054	239.465	209.244	214.582
Kif13b	Kinesin family member 13B	A0A286YCV9_MOUSE		216.187	216.105	171.096	188.925	226.716	219.441	207.846	207.687	206.826	208.026	204.162	193.953	235.945	228.446	210.906	220.374
Anxa7	Annexin A7 (Fragment)	A0A286YCW4_MOUSE		25.5674	30.835	NaN	31.1186	18.2575	50.206	34.8279	32.4312	32.7674	27.3315	26.959	25.5453	24.6068	19.43	59.3421	60.5608
Nrn1	Neuritin 1 (Fragment);Neuritin 1;Neuritin 1;Neuritin	A0A286YCW7_MOUSE;A0A286YD56_MOUSE;D3Z4E2_MOUSE;NRN1_MOUSE		315.918	264.713	176.942	213.349	177.769	190.88	159.256	162.928	210.036	225.595	223.664	230.11	225.313	204.153	296.967	372.469
Camk2g	Calcium/calmodulin-dependent protein kinase II gamma (Fragment)	A0A286YCW8_MOUSE		62.083	51.0406	49.4685	71.2432	82.4294	76.0976	49.4515	79.7841	NaN	NaN	NaN	NaN	NaN	NaN	NaN	NaN
Trappc8	Trafficking protein particle complex 8	A0A286YCX6_MOUSE		1461.96	1507.13	1285.79	1266.15	1494.15	1476.47	1416.97	1362.17	1525.25	1531.97	1446.1	1442.8	1563.37	1550.83	1447.12	1414.25
Dmxl1	Dmx-like 1 (Fragment)	A0A286YD42_MOUSE		NaN	NaN	103.174	NaN	NaN	187.31	125.615	132.462	129.386	114.258	157.096	108.158	130.105	100.312	113.942	150.436
Mak	Male germ cell-associated kinase;Serine/threonine-protein kinase MAK;Isoform 2 of Serine/threonine-protein kinase MAK	A0A286YD80_MOUSE;MAK_MOUSE;MAK_MOUSE		62.6881	65.2016	45.2331	44.2766	49.9343	55.6389	52.1726	51.6757	40.706	59.5748	56.3272	55.4812	55.46	66.905	62.0011	63.2074
Nolc1	Nucleolar and coiled-body phosphoprotein 1;Nucleolar and coiled-body phosphoprotein 1;Nucleolar and coiled-body phosphoprotein 1 (Fragment);Nucleolar and coiled-body phosphoprotein 1	A0A286YDA2_MOUSE;A0A286YDT3_MOUSE;A0A286YDV7_MOUSE;NOLC1_MOUSE		275.287	225.709	162.311	197.248	237.718	275.653	260.558	266.813	226.591	319.036	236.071	228.031	227.278	301.495	255.221	264.917
Tbc1d5	TBC1 domain family, member 5;Rab-GAP TBC domain-containing protein	A0A286YDB3_MOUSE;Q3U325_MOUSE		1415.85	1372.08	1223.42	1159.62	1519.77	1461.23	1397.09	1439.35	1378.96	1399.67	1294.82	1240.76	1299.38	1299.09	1094.12	1142.25
Ccdc120	Coiled-coil domain containing 120 (Fragment)	A0A286YDD1_MOUSE		197.924	216.477	120.75	135.076	191.482	196.357	147.261	198.545	138.271	120.309	153.613	112.884	135.033	132.836	179.021	131.195
Ttbk1	Tau tubulin kinase 1	A0A286YDE4_MOUSE		49.6976	76.7005	38.1423	36.8814	75.6592	84.2356	68.1863	110.418	73.4137	31.19	85.8383	76.3452	83.4707	73.7175	138.791	63.1406
Arhgef3	Rho guanine nucleotide exchange factor 3;Rho guanine nucleotide exchange factor 3 (Fragment);Rho guanine nucleotide exchange factor 3;Isoform 2 of Rho guanine nucleotide exchange factor 3;Isoform 3 of Rho guanine nucleotide exchange factor 3	A0A286YDE6_MOUSE;A0A2X0SFN9_MOUSE;ARHG3_MOUSE;ARHG3_MOUSE;ARHG3_MOUSE		20.6077	26.1687	21.5578	12.1017	19.1679	28.4188	17.16	25.4512	17.958	NaN	NaN	19.7571	19.6746	11.2535	22.9037	13.9894
Vti1a	Vesicle transport through interaction with t-SNAREs 1A	A0A286YDF2_MOUSE		714.565	597.749	782.586	825.085	624.038	744.873	648.049	692.06	691.562	710.333	734.299	805.78	698.802	722.781	780.801	782.414
Myof	Myoferlin;Myof protein;Myoferlin;Myoferlin	A0A286YDF5_MOUSE;B9EK95_MOUSE;E9Q390_MOUSE;MYOF_MOUSE		133.799	102.9	81.7967	59.8843	64.8787	91.9442	62.7847	55.9913	76.5477	75.2266	65.1475	73.7811	123.086	134.07	111.458	124.037
Zfp874b;Zfp874a;Zfp874b;Zfp874a	Zinc finger protein 874b (Fragment);C330011K17Rik protein;Regulator of sex-limitation candidate 16;Regulator of sex-limitation candidate 15	A0A286YDG9_MOUSE;Q66JQ2_MOUSE;Q7M6X2_MOUSE;Q8BX23_MOUSE		NaN	NaN	53.7987	35.6744	NaN	NaN	64.713	69.7535	36.7224	33.7262	NaN	40.2923	28.5404	NaN	NaN	NaN
Sec24c	Sec24 related gene family, member C (S. cerevisiae);MKIAA0079 protein (Fragment)	A0A286YDI8_MOUSE;Q80U83_MOUSE		1743.4	1817.81	2048.78	2103.03	1506.85	1501.13	1858.6	1809.16	2031.39	2075.63	1818.92	1814.88	1780.36	1733.08	1312.2	1416.86
Kdm3b	Lysine-specific demethylase	A0A286YDJ6_MOUSE		NaN	NaN	45.5826	49.887	NaN	61.6859	94.8129	51.705	48.7831	42.1092	65.9416	80.4367	103.899	46.5509	NaN	24.3004
Cnnm1	Metal transporter	A0A286YDL2_MOUSE		151.797	110.101	99.6439	104.515	96.2154	110.035	107.936	99.9083	99.1773	114.632	101.643	84.1776	97.1221	113.789	120.147	130.497
Eml3	Echinoderm microtubule associated protein like 3	A0A286YDN1_MOUSE		86.7102	84.027	79.2541	60.9033	82.8064	85.613	73.5228	68.7583	83.1402	81.4589	84.8866	65.5869	77.4012	93.454	97.7202	94.7553
Cetn3	Centrin 3 (Fragment)	A0A286YDP0_MOUSE		661.465	605.626	803.621	662.695	779.454	1067.17	895.459	944.38	707.202	619.267	749.499	797.328	923.335	962.122	571.498	693.48
Btrc	Beta-transducin repeat containing protein;F-box/WD repeat-containing protein 1A;Isoform 2 of F-box/WD repeat-containing protein 1A	A0A286YDT6_MOUSE;FBW1A_MOUSE;FBW1A_MOUSE		111.544	114.46	82.2636	82.6523	73.0997	94.4888	74.9356	79.6668	76.2784	68.7217	61.5123	50.5749	68.8268	64.04	71.1766	78.6456
Ap3s1	AP complex subunit sigma	A0A286YDU3_MOUSE		2708.09	3381.77	2373.42	2250.03	4175.04	3505.06	3575.27	3714.28	2813.68	2709.08	3381.21	2760.02	3693.89	3778.15	1079.18	1007.82
Cadps	Ca2+-dependent secretion activator (Fragment)	A0A286YE00_MOUSE		502.853	587.644	831.487	785.008	696.711	763.669	698.809	773.691	906.51	879.831	916.514	906.523	863.226	914.597	1099.03	1016.85
Grk6;Grk6;Grk6;GRK6;Grk6;GRK6;Grk6	G protein-coupled receptor kinase;G protein-coupled receptor kinase 6;Isoform GRK6B of G protein-coupled receptor kinase 6;G protein-coupled receptor kinase;G protein-coupled receptor kinase;G protein-coupled receptor kinase;G protein-coupled receptor kinase	A0A286YE10_MOUSE;GRK6_MOUSE;GRK6_MOUSE;O70296_MOUSE;Q3UK88_MOUSE;Q792R0_MOUSE;Q9EP84_MOUSE		321.707	350.258	238.117	261.261	253.8	227.793	237.223	240.825	213.344	224.606	253.55	254.929	240.243	257.004	286.73	289.795
Spast	Spastin;Spastin;Isoform 2 of Spastin	A0A286YE25_MOUSE;SPAST_MOUSE;SPAST_MOUSE		89.7701	81.0056	73.0308	64.679	55.105	59.2963	71.0549	78.6608	76.4566	76.6644	63.5884	64.5323	57.5349	61.9141	68.3034	80.9778
Ube2e1	E2 ubiquitin-conjugating enzyme (Fragment);Ubiquitin-conjugating enzyme E2 E1;E2 ubiquitin-conjugating enzyme	A0A286YE31_MOUSE;UB2E1_MOUSE;Q541Z5_MOUSE		52.1304	77.2604	60.1374	67.395	62.6879	56.8425	36.6492	50.5212	65.3601	55.4448	90.2576	114.606	66.2174	51.1985	10.6334	84.5313
Rin1	Ras and Rab interactor 1	A0A2C9F2A2_MOUSE		1725.65	1811.33	1664.6	1653.74	1485.36	1421.25	1496.94	1509.15	1465.5	1481.47	1299.79	1312.03	1537.33	1605.74	1591.38	1624.09
Pxk	PX domain containing serine/threonine kinase;PX domain-containing protein kinase-like protein;Isoform 2 of PX domain-containing protein kinase-like protein;Isoform 3 of PX domain-containing protein kinase-like protein	A0A2C9F2B5_MOUSE;PXK_MOUSE;PXK_MOUSE;PXK_MOUSE		77.78	89.9753	53.3017	61.9228	59.7831	61.7241	51.8661	55.3598	93.0485	60.9808	70.7928	76.3042	49.7084	47.2965	90.207	66.4116
Anxa7	Annexin;Annexin A7;Annexin;Annexin	A0A2C9F2D2_MOUSE;ANXA7_MOUSE;Q3TJ49_MOUSE;Q922A2_MOUSE		13463.1	13779.3	12430.1	12519.6	15066.4	14474.2	14237.8	14619.9	13897.5	13645.3	15524.8	15836.5	13558.9	13763.2	14417.2	13744.1
Hlcs	Holocarboxylase synthetase (biotin- [propriony-Coenzyme A-carboxylase (ATP-hydrolysing)] ligase);BPL/LPL catalytic domain-containing protein;Biotin--protein ligase	A0A2I3BPG4_MOUSE;Q3TZ03_MOUSE;BPL1_MOUSE		156.688	130.121	96.9314	135.404	134.299	130.374	112.041	125.372	126.201	176.005	98.9542	113.514	141.971	144.465	108.866	144.822
Ndrg2	Protein NDRG2 (Fragment)	A0A2I3BPL1_MOUSE		1439.81	1535.15	1754.53	1408.93	1206.43	1395.77	1488.51	1657.51	1008.32	1135.59	1354.99	1148.72	1282.28	1243.01	838.554	853.703
Ebag9	Estrogen receptor-binding fragment-associated gene 9 (Fragment);Receptor-binding cancer antigen expressed on SiSo cells	A0A2I3BPQ0_MOUSE;RCAS1_MOUSE		20.8607	15.8129	17.9574	16.8959	14.197	20.0456	22.8368	16.7789	NaN	22.5299	4.32808	13.7113	12.8405	13.4403	25.6341	22.52
Ano6	Anoctamin;Anoctamin;Anoctamin-6	A0A2I3BPX3_MOUSE;A0A2I3BPY8_MOUSE;ANO6_MOUSE		49.6141	75.1035	65.561	43.3062	63.078	NaN	75.2574	50.8092	45.2163	61.4271	34.5165	52.8877	54.482	61.0168	60.3443	56.5138
Lrch1	Leucine-rich repeats and calponin homology (CH) domain containing 1;Leucine-rich repeat and calponin homology domain-containing protein 1;Calponin-homology (CH) domain-containing protein (Fragment)	A0A2I3BQ16_MOUSE;LRCH1_MOUSE;Q3UP01_MOUSE		176.125	206.137	144.705	148.824	150.254	165.549	140.98	146.129	152.983	159.211	115.403	124.717	140.875	162.086	160.291	161.762
Adcy8	Adenylate cyclase type 8	A0A2I3BQ46_MOUSE;ADCY8_MOUSE		NaN	NaN	17.5279	39.07	19.2187	35.002	35.5796	31.6473	36.4361	30.3527	43.3914	19.976	27.7939	15.5739	37.2783	43.4329
Dgkh	Diacylglycerol kinase	A0A2I3BQ48_MOUSE		2924.15	3091.15	2869.86	2876.46	2925.46	2886.08	2838.65	2837.16	2181.56	2108.68	2166.23	2183.59	2199.08	2232.43	2363.5	2391.72
Stk3	Serine/threonine-protein kinase 3	A0A2I3BQE0_MOUSE;STK3_MOUSE		521.804	528.844	509.008	481.983	451.73	451.026	496.676	467.037	436.881	460.312	505.358	455.026	483.045	546.093	479.102	435.166
Slc22a17	Solute carrier family 22 (organic cation transporter), member 17	A0A2I3BQG7_MOUSE		194.06	166.347	166.603	162.79	163.119	135.498	119.273	132.898	115.196	112.268	131.954	130.656	107.03	121.942	96.5388	74.9273
Tmem184b	Transmembrane protein 184b;Transmembrane protein 184b (Fragment)	A0A2I3BQI5_MOUSE;A0A2R8VI00_MOUSE		623.198	224.358	90.1726	NaN	144.605	171.611	113.889	110.578	NaN	59.1093	110.404	99.3309	116.25	153.525	NaN	NaN
Ndrg2	Protein NDRG2 (Fragment)	A0A2I3BQM5_MOUSE		101.802	98.4678	58.6533	72.4019	161.946	189.351	103.929	138.308	1154.08	1107.57	111.817	127.614	182.775	153.225	29.1086	40.5767
Camk2g	calcium/calmodulin-dependent protein kinase	A0A2I3BQP6_MOUSE		4863.52	5055.77	4838	4758.84	4833.95	4752.77	5106.5	5229.42	1002.47	932.018	924.894	887.203	1175.7	1101.11	1344.56	1227.53
Nt5dc2	5'-nucleotidase domain containing 2 (Fragment);5'-nucleotidase domain containing 2;5'-nucleotidase domain containing 2;5'-nucleotidase domain containing 2	A0A2I3BQR1_MOUSE;A0A2I3BR81_MOUSE;A0A2I3BRL0_MOUSE;Q91X76_MOUSE		39.5076	45.5509	38.3348	47.3767	21.9755	43.9352	25.6834	28.306	44.3523	43.4231	54.5229	46.4639	38.6021	39.2653	35.8505	43.2104
Ubr5	Ubiquitin protein ligase E3 component n-recognin 5	A0A2I3BQS6_MOUSE		305.696	295.958	247.253	258.109	340.258	346.573	305.452	303.208	267.245	283.679	256.861	252.553	284.692	288.476	258.951	250.642
Sall2	Spalt like transcription factor 2;C2H2-type domain-containing protein;MKIAA0360 protein (Fragment);Sal-like protein 2	A0A2I3BQV4_MOUSE;Q8BP69_MOUSE;Q8CHG2_MOUSE;SALL2_MOUSE		31.107	30.0206	23.5913	26.4898	32.1852	28.3709	20.5431	15.9668	11.429	11.4824	21.0418	17.9277	28.5752	31.1914	24.8735	32.9581
Haus4	HAUS augmin-like complex, subunit 4 (Fragment);HAUS augmin-like complex subunit 4	A0A2I3BQW1_MOUSE;HAUS4_MOUSE		44.7969	39.8693	36.55	32.2044	21.4904	26.1719	27.5687	26.4442	31.8141	34.3652	18.1375	35.9968	27.8774	39.4704	34.6821	32.7326
Or5a1	Olfactory receptor	A0A2I3BR00_MOUSE;Q8VFV2_MOUSE		NaN	NaN	612.762	632.849	NaN	NaN	NaN	NaN	909.126	752.442	NaN	950.73	NaN	NaN	416.397	352.114
Nwd1	NACHT and WD repeat domain containing 1;NACHT domain- and WD repeat-containing protein 1;NACHT and WD repeat domain containing 1	A0A2I3BR96_MOUSE;NWD1_MOUSE;E0CX99_MOUSE		671.43	600.471	471.442	579.618	570.018	630.02	489.317	512.509	534.401	507.098	457.085	404.054	550.377	506.861	531.57	490.862
Rbfox2	RNA binding protein, fox-1 homolog (C. elegans) 2 (Fragment);RNA binding protein, fox-1 homolog (C. elegans) 2 (Fragment)	A0A2I3BRA9_MOUSE;A0A2I3BRU6_MOUSE		161.555	104.747	157.997	113.323	132.008	144.677	92.4813	85.6344	104.133	91.0961	93.7066	168.383	92.5947	107.327	140.851	151.457
Tbc1d23	TBC1 domain family member 23	A0A2I3BRD1_MOUSE		981.235	976.841	952.396	993.096	1058.17	1072.19	1058.26	1050.32	889.085	852.591	983.696	954.383	902.184	983.452	1005.01	992.802
Gpr183	G protein-coupled receptor 183 (Fragment)	A0A2I3BRD8_MOUSE		NaN	47.4227	45.7846	NaN	NaN	46.4066	NaN	63.2751	702.777	505.593	59.2962	69.6572	248.624	270.733	NaN	58.3629
Eny2	Transcription and mRNA export factor ENY2	A0A2I3BRK6_MOUSE;ENY2_MOUSE		200.042	215.903	155.12	128.963	322.449	326.299	271.372	215.583	194.321	208.102	232.958	246.328	233.585	255.584	201.795	145.921
Tinf2	Terf1 (TRF1)-interacting nuclear factor 2;TERF1-interacting nuclear factor 2 N-terminal domain-containing protein;TRF1-interacting protein TIN2;Terf1 (TRF1)-interacting nuclear factor 2;TERF1-interacting nuclear factor 2	A0A2I3BRL3_MOUSE;Q3UMZ4_MOUSE;Q8CJ45_MOUSE;Q8K1K3_MOUSE;TINF2_MOUSE		NaN	7.69758	16.3281	13.7226	NaN	23.4082	21.6531	21.1089	29.9414	14.3994	16.0617	20.254	23.4575	13.2525	21.7531	30.365
Gm7324;Rbmxl1	Predicted gene 7324;RNA binding motif protein, X-linked-like-1	A0A2I3BRL8_MOUSE;RMXL1_MOUSE		32.8211	32.3774	22.6825	30.9318	56.696	67.7979	NaN	28.0009	18.9314	29.9324	24.8536	20.3998	22.274	17.2643	77.5074	22.1317
Peli2	Pellino 2 (Fragment);E3 ubiquitin-protein ligase pellino homolog;E3 ubiquitin-protein ligase pellino homolog;E3 ubiquitin-protein ligase pellino homolog 2	A0A2I3BRM8_MOUSE;A0A991EKZ6_MOUSE;E9QPQ6_MOUSE;PELI2_MOUSE		86.2693	53.7684	92.8758	97.7175	54.4242	71.8035	73.5177	80.502	50.9229	45.3368	38.2947	57.3407	40.0543	74.3446	61.0314	87.0536
Mapk1ip1l	MAPK-interacting and spindle-stabilizing protein-like (Fragment);MAPK-interacting and spindle-stabilizing protein-like	A0A2I3BRS9_MOUSE;MISSL_MOUSE		215.642	171.687	161.963	194.157	332.271	418.523	206.131	219.794	245.792	219.186	187.581	187.622	198.739	195.017	203.362	177.134
Tsc2	TSC complex subunit 2	A0A2I3BRT5_MOUSE		77.5896	36.1433	35.8021	40.861	53.1775	35.6747	57.5485	47.59	41.5847	39.9356	30.4681	34.5336	66.0856	64.4909	59.4534	46.6131
Spcs1	Signal peptidase complex subunit 1	A0A2I3BRW0_MOUSE		NaN	NaN	44.5252	66.9637	121.22	177.54	128.041	87.6692	103.766	60.6073	218.469	214.354	158.482	171.443	182.929	191.429
Sorbs3	Sorbin and SH3 domain containing 3;Sorbin and SH3 domain containing 3;Vinexin	A0A2I3BS41_MOUSE;Q8K0M3_MOUSE;VINEX_MOUSE		309.289	300.125	271.596	325.088	240.391	231.553	338.254	232.261	252.789	298.136	298.271	332.11	294.017	310.026	242.642	89.8456
Nudcd1	NudC domain-containing protein 1	A0A2K6EDK3_MOUSE		50.9297	39.856	64.1935	38.8197	50.9177	61.3629	55.6708	59.3658	29.0926	29.0346	91.5133	89.3003	89.2926	83.8212	51.1653	37.7938
Mbnl2	Muscleblind like splicing factor 2;Muscleblind-like protein 2	A0A2K6EDM5_MOUSE;MBNL2_MOUSE		200.999	218.643	165.014	175.103	108.325	162.36	153.642	142.603	111.229	121.708	140.383	147.827	135.226	132.644	246.347	263.075
Epb41l1	Erythrocyte membrane protein band 4.1 like 1 (Fragment)	A0A2R8VHB6_MOUSE		18.6491	40.1618	9.388	31.1169	10.8483	17.3196	23.0734	39.72	80.0416	37.5327	51.6463	32.3666	82.243	81.894	69.4914	78.1189
Naga	Alpha-galactosidase (Fragment)	A0A2R8VHC0_MOUSE		645.034	509.56	301.028	437.475	913.675	1025	573.831	774.689	628.218	488.826	993.724	960.375	982.64	847.062	123.57	61.246
D430041D05Rik	RIKEN cDNA D430041D05 gene	A0A2R8VHF1_MOUSE;A0A2R8VKG2_MOUSE;D3YZ21_MOUSE		30.3084	39.5036	31.9092	36.5231	32.8132	28.0619	28.6492	28.7677	29.0063	28.3827	25.2361	27.3258	23.4568	23.8555	24.6017	18.638
Myh11	Myosin-11;Myosin-11;Myosin-11;Myosin-11 (Fragment)	A0A2R8VHF9_MOUSE;A0A338P6K2_MOUSE;E9QPE7_MOUSE;Q69ZX3_MOUSE		103.947	155.648	96.8119	85.4871	128.986	127.15	156.103	95.6366	65.093	82.8046	96.3251	89.4123	107.247	188.58	133.664	90.0287
Pcbp2	Poly(rC) binding protein 2 (Fragment)	A0A2R8VHL8_MOUSE		802.014	802.091	731.028	856.865	800.417	833.192	880.785	829.856	716.668	651.973	879.145	915.27	878.029	844.193	816.52	785.902
Tns2	Tensin 2;Tensin-2;Isoform 2 of Tensin-2;Isoform 3 of Tensin-2;Isoform 4 of Tensin-2	A0A2R8VHQ0_MOUSE;TENS2_MOUSE;TENS2_MOUSE;TENS2_MOUSE;TENS2_MOUSE		60.6752	59.562	49.7822	52.9922	51.3743	54.7945	45.6336	51.6076	52.8403	50.0674	46.1037	38.8788	63.607	61.7166	76.7481	76.0743
Masp1	Mannan-binding lectin serine peptidase 1	A0A2R8VHR3_MOUSE		58.8916	63.1207	87.4881	107.259	101.65	72.3904	104.484	117.262	48.655	89.3688	86.3301	60.7747	56.1771	51.9957	95.8063	107.543
Krt80	Keratin 80;Keratin, type II cytoskeletal 80	A0A2R8VHR6_MOUSE;K2C80_MOUSE		896.651	1080	672.095	865.596	945.887	1240.85	935.655	980.713	1242.28	1100.29	881.868	777.374	890.607	1006.01	647.043	625.092
Septin3	Neuronal-specific septin-3 (Fragment)	A0A2R8VHR7_MOUSE		462.411	455.761	356.535	340.727	303.002	294.591	293.385	296.63	604.687	675.251	496.814	528.271	388.898	421.123	331.384	419.009
Pcbp2	Poly(rC) binding protein 2	A0A2R8VI25_MOUSE		59.6267	61.9469	57.7059	57.4991	46.4804	49.9697	NaN	96.3287	77.0781	80.6061	51.0548	64.5744	60.0138	55.2399	NaN	101.655
Rbfox1	RNA binding protein fox-1 homolog 1;RNA binding protein fox-1 homolog 1;Isoform 2 of RNA binding protein fox-1 homolog 1;Isoform 3 of RNA binding protein fox-1 homolog 1	A0A2R8VK79_MOUSE;RFOX1_MOUSE;RFOX1_MOUSE;RFOX1_MOUSE		220.384	215.277	306.798	287.532	110.91	172.231	163.381	202.318	199.06	198.448	160.863	157.956	185.044	228.587	274.2	241.444
Tfcp2	Transcription factor CP2;Alpha-globin transcription factor CP2;Isoform 2 of Alpha-globin transcription factor CP2	A0A2R8VKI7_MOUSE;TFCP2_MOUSE;TFCP2_MOUSE		446.688	432.532	435.978	437.499	558.941	572.37	521.637	553.018	509.242	575.773	584.223	573.608	396.094	399.259	353.807	384.346
Larp4	La ribonucleoprotein 4;La ribonucleoprotein 4;La ribonucleoprotein 4;La ribonucleoprotein 4;HTH La-type RNA-binding domain-containing protein;HTH La-type RNA-binding domain-containing protein;La-related protein 4	A0A2R8VKL5_MOUSE;A0A2R8W6Y5_MOUSE;E9Q066_MOUSE;G3X9Q6_MOUSE;Q3T9Z3_MOUSE;Q3UT02_MOUSE;LARP4_MOUSE		181.313	84.3839	142.917	130.959	119.797	116.589	133.776	135.368	117.948	153.426	170.138	123.866	130.29	146.497	144.182	231.505
Rcan2	Regulator of calcineurin 2 (Fragment);Calcipressin-2;Calcineurin inhibitory protein ZAKI-4 beta;Calcipressin-2	A0A2R8W6E8_MOUSE;Q543P2_MOUSE;Q8VIP4_MOUSE;RCAN2_MOUSE		255.125	207.897	109.339	139.98	141.894	125.877	149.925	131.834	192.741	185.148	153.65	168.213	117.714	148.101	162.086	188.317
Oxr1	Oxidation resistance 1 (Fragment)	A0A2R8W6J0_MOUSE		NaN	NaN	NaN	18.0223	NaN	NaN	22.1638	14.4212	58.33	44.9924	5.49099	NaN	30.7971	33.3221	NaN	NaN
Gm49496;Gpbp1;Gpbp1	Vasculin (Fragment);Vasculin;Isoform 2 of Vasculin	A0A2R8W6M1_MOUSE;GPBP1_MOUSE;GPBP1_MOUSE		101.562	105.566	102.188	86.0481	55.226	NaN	97.6087	104.87	109.025	36.2828	68.2447	108.026	75.5845	130.119	48.1928	32.9904
Cd47	Leukocyte surface antigen CD47	A0A2R8W6P0_MOUSE		2126.93	2043.4	2186.29	2333.43	1359.11	1639.39	1657.11	1669.83	1611.2	1619.72	1828.51	1714.36	1664.06	1856.34	2085.37	2192.49
Septin3	Neuronal-specific septin-3	A0A2R8W6V9_MOUSE		1830.78	4288.36	1734.11	2124.41	1938.79	2244.93	2127.55	1879.03	2557.73	2247.77	2641.87	2945.23	2457.9	2899.16	2472.82	2076.49
Polr2f	Polymerase (RNA) II (DNA directed) polypeptide F;DNA-directed RNA polymerases I, II, and III subunit RPABC2;DNA-directed RNA polymerases I, II, and III subunit RPABC2;DNA-directed RNA polymerases I, II, and III subunit RPABC2	A0A2U3TZ54_MOUSE;RPAB2_MOUSE;Q3TES3_MOUSE;Q3TN04_MOUSE		86.251	NaN	174.584	173.303	316.567	299.364	148.996	167.164	186.271	187.147	199.928	199.43	164.641	131.204	66.0458	55.3842
STARD13;Stard13;Stard13	STARD13 (Fragment);StAR-related lipid transfer (START) domain containing 13;StAR-related lipid transfer protein 13	A0A2X0SFI9_MOUSE;F8WIY7_MOUSE;STA13_MOUSE		57.7351	55.8085	50.4778	53.6286	52.7459	53.926	49.1743	52.6022	47.484	51.1549	53.5965	48.8741	47.3312	52.1638	46.3128	49.2583
OPHN1;Ophn1;Ophn1	Oligophrenin-1 (Fragment);Oligophrenin-1;Oligophrenin-1	A0A2X0SSN2_MOUSE;Q8C4C7_MOUSE;OPHN1_MOUSE		197.569	178.041	133.51	159.12	170.857	175.612	167.385	156.048	136.875	155.538	128.942	123.479	151.331	164.87	177.203	156.29
ARAP3;Arap3;Arap3	ARAP3 (Fragment);Arf-GAP with Rho-GAP domain, ANK repeat and PH domain-containing protein 3;Isoform 2 of Arf-GAP with Rho-GAP domain, ANK repeat and PH domain-containing protein 3	A0A2X0TVQ3_MOUSE;ARAP3_MOUSE;ARAP3_MOUSE		130.029	159.341	103.935	90.2732	107.484	99.1899	94.1402	85.6184	107.809	93.1819	100.853	84.4147	93.6092	103.309	70.2921	77.072
DOCK11;Dock11	DOCK11;Dedicator of cytokinesis protein 11	A0A2X0U2I4_MOUSE;DOC11_MOUSE		47.8583	47.9149	30.2346	37.3724	25.7698	30.9517	31.1425	27.8931	34.4742	30.3701	32.0281	28.7055	48.9388	37.6975	42.297	46.6388
Clcn2	Chloride channel protein 2;Chloride channel protein 2;Chloride channel protein 2 (Fragment);Chloride channel protein 2	A0A338P673_MOUSE;A9C437_MOUSE;Q3TBI1_MOUSE;CLCN2_MOUSE		NaN	NaN	13.052	21.288	24.664	NaN	NaN	17.2324	13.0676	15.6002	14.2852	16.4048	29.2074	13.1688	18.8692	17.9583
Slc7a4	Solute carrier family 7 (cationic amino acid transporter, y+ system), member 4 (Fragment);Solute carrier family 7 (cationic amino acid transporter, y+ system), member 4 (Fragment);Solute carrier family 7 (cationic amino acid transporter, y+ system), member 4 (Fragment);Solute carrier family 7 (cationic amino acid transporter, y+ system), member 4 (Fragment);Solute carrier family 7 (cationic amino…	A0A338P685_MOUSE;A0A338P6C5_MOUSE;A0A338P6V0_MOUSE;A0A338P740_MOUSE;A0A338P754_MOUSE;A0A338P7B4_MOUSE;CTR4_MOUSE;Q8BML4_MOUSE;Q91WD3_MOUSE		292.248	238.735	212.045	203.669	276.704	235.036	193.19	222.53	147.172	170.424	220.165	162.621	200.898	218.792	260.27	247.44
Dlg4	Discs large MAGUK scaffold protein 4	A0A338P6E5_MOUSE		207.188	200.818	221.536	253.004	513.453	448.131	363.162	375.438	139.951	173.641	167.958	191.592	474.201	267.241	240.136	245.724
Osbpl11	Oxysterol-binding protein;Oxysterol-binding protein;Oxysterol-binding protein-related protein 11	A0A338P6F2_MOUSE;G5E8A0_MOUSE;OSB11_MOUSE		673.066	744.028	713.705	740.648	738.291	730.749	659.958	694.981	637.323	616.322	692.279	725.764	689.05	698.599	768.857	763.77
Robo1	Roundabout guidance receptor 1 (Fragment);Roundabout guidance receptor 1	A0A338P6F7_MOUSE;G5E843_MOUSE		66.5066	44.0005	47.8523	56.7364	54.3999	19.3706	34.8494	35.4929	40.5685	45.7223	27.6864	31.6907	43.8084	57.2681	63.0456	73.2886
Polr2h	DNA-directed RNA polymerases I, II, and III subunit RPABC3;DNA-directed RNA polymerases I, II, and III subunit RPABC3	A0A338P6I2_MOUSE;RPAB3_MOUSE		265.265	226.987	222.207	231.164	281.095	290.259	314.358	291.83	260.531	293.995	291.366	306.769	246.201	267.796	257.24	272.958
Dlg2	Discs large MAGUK scaffold protein 2;Isoform 7 of Disks large homolog 2	A0A338P6J0_MOUSE;DLG2_MOUSE		1779.75	1830	1667.76	1727.07	1927.85	2062.54	1975.95	1888.2	1692.24	1679.39	1659.51	1568.96	1698.94	1653	1629.91	1677.54
Abcf3	ATP-binding cassette, sub-family F (GCN20), member 3 (Fragment)	A0A338P6L5_MOUSE		150.068	94.4331	197.791	171.467	95.7354	68.9959	150.416	109.969	122.216	102.24	81.0198	58.3263	93.8216	74.1184	249.659	212.98
Crybg3	Beta-gamma crystallin domain containing 3	A0A338P6N4_MOUSE		89.8423	94.7123	79.0836	81.0153	53.7453	54.0667	49.2583	48.8734	37.0519	40.3517	35.5788	38.6526	70.1418	70.5082	84.3864	84.9803
Acap2	Arf-GAP with coiled-coil, ANK repeat and PH domain-containing protein	A0A338P6P6_MOUSE		3353.14	3454.85	3648.22	3686.58	3646.32	3726.57	3874.04	3916.82	3486.85	3590.12	4059.77	3906.62	3589.81	3575.97	4153.33	4217.97
Pacsin2	Protein kinase C and casein kinase substrate in neurons 2 (Fragment)	A0A338P6P7_MOUSE		241.26	209.578	243.368	256.677	305.316	259.786	288.156	306.091	258.52	266.806	279.918	287.501	280.726	298.898	353.404	407.302
Gm49601	Septin	A0A338P6R8_MOUSE		2117.77	2116.38	1912.18	2313.63	4653.2	5082.22	4127.6	4281.96	2381.24	2363.5	5142.78	5139.11	4227.76	4192.89	944.816	659.5
Ap2m1	Adaptor-related protein complex 2, mu 1 subunit (Fragment)	A0A338P6T4_MOUSE		172.696	192.738	229.198	141.018	160.53	192.452	180.585	167.265	356.344	278.483	168.034	154.882	316.996	305.602	184.987	55.5736
Arid1b	AT rich interactive domain 1B (SWI-like)	A0A338P6U8_MOUSE;A0A8Q0PK87_MOUSE;E9Q6R4_MOUSE		320.552	314.517	299.778	282.147	288.77	312.099	306.364	296.411	285.82	258.354	275.122	275.097	334.891	347.784	324.048	329.286
Gart	Phosphoribosylglycinamide formyltransferase (Fragment)	A0A338P6X4_MOUSE		NaN	NaN	94.3321	NaN	NaN	NaN	72.842	NaN	NaN	NaN	NaN	NaN	NaN	30.3853	NaN	NaN
Eif4a2	Eukaryotic initiation factor 4A-II (Fragment)	A0A338P6X5_MOUSE		46.2882	54.961	34.6168	32.1621	25.8317	NaN	39.087	38.0134	52.3093	38.7913	51.2781	48.7033	63.1071	59.0384	47.3141	60.69
Ahsg	Alpha-2-HS-glycoprotein	A0A338P703_MOUSE;A0A338P7G1_MOUSE;A0A338P7H5_MOUSE;FETUA_MOUSE;Q3TIU3_MOUSE;Q3UEK5_MOUSE;Q3UEK9_MOUSE		NaN	NaN	NaN	NaN	NaN	NaN	NaN	NaN	23.6461	56.8189	34.3813	41.9269	64.4642	34.8821	63.2481	82.7232
Med15	Mediator of RNA polymerase II transcription subunit 15;Mediator of RNA polymerase II transcription subunit 15;Mediator of RNA polymerase II transcription subunit 15;Mediator of RNA polymerase II transcription subunit 15;Mediator of RNA polymerase II transcription subunit 15 (Fragment);Mediator of RNA polymerase II transcription subunit 15;Mediator of RNA polymerase II transcription subunit 15	A0A338P730_MOUSE;E9Q7C1_MOUSE;Q3TE00_MOUSE;Q3TLG6_MOUSE;Q6KAM1_MOUSE;Q7TQE1_MOUSE;MED15_MOUSE		64.0761	85.8868	58.9948	66.0055	73.3626	69.468	68.485	56.0189	64.6231	50.9652	69.3015	64.9161	68.4895	71.5729	74.947	73.1638
Mapk1	mitogen-activated protein kinase (Fragment)	A0A338P736_MOUSE		408.407	392.592	310.425	281.683	214.006	225.492	618.391	599.806	3289.99	3279.71	409.095	411.905	2560.38	2508.7	253.625	269.761
Wdr53	WD repeat domain 53 (Fragment);WD repeat-containing protein 53	A0A338P796_MOUSE;WDR53_MOUSE		18.5259	27.4461	39.7462	50.3556	24.7098	31.8604	18.9732	39.0018	28.1273	43.3595	50.1301	41.7672	16.64	36.1414	21.0541	NaN
Tmem181a	Transmembrane protein 181A	A0A338P7C9_MOUSE		115.436	118.079	97.5099	87.7819	116.337	91.466	105.599	77.0512	68.4227	98.3948	67.8157	81.1762	108.646	109.204	158.991	111.169
Top3b	DNA topoisomerase (Fragment);DNA topoisomerase;DNA topoisomerase 3-beta-1	A0A338P7E0_MOUSE;Q3UJF5_MOUSE;TOP3B_MOUSE		81.4019	89.0323	43.2697	30.0344	66.6123	52.4254	36.7538	39.1742	33.7993	26.1986	23.8227	33.3971	42.6495	39.7383	NaN	25.405
Smim29	Small integral membrane protein 29	A0A338P7F5_MOUSE;SIM29_MOUSE		171.295	117.654	166.907	138.469	193.789	221.253	185.17	195.7	167.693	158.236	139.735	179.621	168.196	199.652	166.497	141.261
Zdhhc19	Palmitoyltransferase;Palmitoyltransferase;Palmitoyltransferase ZDHHC19	A0A338P7I3_MOUSE;B9EIU6_MOUSE;ZDH19_MOUSE		1079.28	1011.24	1154.81	1225.03	1464.28	1410.73	1282.51	1401.6	1368.33	1306.81	1392.91	1382.04	1353.68	1280.28	392.984	281.335
Pde10a	Phosphodiesterase	A0A384DV92_MOUSE		40.69	88.5881	68.3987	78.6659	81.327	57.2227	34.8156	135.497	21.9527	84.6079	89.753	32.1843	62.6419	29.667	NaN	NaN
Atg5	Autophagy protein 5 (Fragment);Autophagy protein 5	A0A385JBX3_MOUSE;ATG5_MOUSE		1442.73	1334.77	1315.38	1354.19	1313.45	1263.88	1278.63	1271.35	1363.49	1414.92	1475.74	1484.43	1378.13	1355.12	1345.31	1546.92
Cnr1	Cannabinoid receptor 1	A0A385KNU8_MOUSE;CNR1_MOUSE		171.495	119.653	145.507	165.618	92.6968	62.8757	80.6524	108.834	114.662	135.003	83.4871	107.961	144.859	133.568	113.524	140.687
Adib;C1qc	Adiponectin b;Complement C1q subcomponent subunit C	A0A3B0INZ4_MOUSE;C1QC_MOUSE		289.907	314.296	335.887	373.851	458.017	511.032	491.064	411.26	416.845	399.002	411.288	449.134	673.877	684.96	513.976	523.735
C1qa	Complement C1q subcomponent subunit A	A0A3B0IP04_MOUSE;C1QA_MOUSE;Q3TXB1_MOUSE;Q3UBX7_MOUSE		352.271	346.533	281.997	276.512	390.347	385.757	308.867	348.76	355.833	364.185	320.013	345.75	524.702	541.756	352.419	414.496
C1qtnf4	Adiponectin n;Complement C1q tumor necrosis factor-related protein 4	A0A3B0IP17_MOUSE;C1QT4_MOUSE		150.871	126.729	136.892	123.587	181.654	127.46	129.93	134.273	95.3768	107.367	136.811	122.583	175.759	167.913	161.606	166.524
C1ql3	Adiponectin j;Complement C1q-like protein 3	A0A3B0IT58_MOUSE;C1QL3_MOUSE		205.477	223.891	217.348	178.515	161.036	181.751	186.989	177.68	253.716	215.746	198.313	165.667	169.322	152.385	236.434	198.844
Adia;C1qb;C1qb	Adiponectin a;Complement C1q subcomponent subunit B;C1q domain-containing protein	A0A3B0ITG8_MOUSE;C1QB_MOUSE;Q3U6I5_MOUSE		260.831	225.749	303.391	293.954	557.946	459.683	410.658	389.479	277.991	294.431	376.117	354.054	671.418	614.863	461.699	472.816
Ift140	Intraflagellar transport 140	A0A3B2W3F6_MOUSE		912.697	910.876	733.575	729.708	782.648	825.689	755.345	774.272	671.765	679.778	604.789	550.738	675.848	716.038	710.591	704.277
Zfp523;Zfp523;Znf76;Znf76	Zinc finger protein 523;Zinc finger protein 523;Zinc finger protein 76;Isoform 2 of Zinc finger protein 76	A0A3B2W3I6_MOUSE;A0A3B2W4C6_MOUSE;ZNF76_MOUSE;ZNF76_MOUSE		54.3153	30.4908	29.3006	31.7667	41.569	50.9761	48.6836	33.4092	32.3508	32.4129	18.5278	36.6561	14.6621	32.7632	29.4648	37.2354
Pde10a	Phosphodiesterase 10A (Fragment)	A0A3B2W3N3_MOUSE		227.857	154.567	328.743	327.365	95.9677	100.376	97.5839	138.124	35.4839	37.0026	73.5344	40.5251	307.909	348.867	319.187	293.539
Ndufa11	NADH dehydrogenase [ubiquinone] 1 alpha subcomplex subunit 11	A0A3B2W441_MOUSE;G5E814_MOUSE;NDUAB_MOUSE		64.7749	60.8079	26.4953	27.9142	NaN	NaN	NaN	NaN	39.7911	NaN	34.548	NaN	46.6567	62.9221	56.5436	54.2249
Prkn	RBR-type E3 ubiquitin transferase;E3 ubiquitin-protein ligase parkin	A0A3B2W489_MOUSE;PRKN_MOUSE		NaN	33.9837	19.2623	27.9932	31.7673	22.0584	20.0533	21.895	29.3288	36.1485	24.0416	23.2537	33.6	31.1416	NaN	NaN
Cd2ap	CD2-associated protein	A0A3B2W812_MOUSE;B2RRE8_MOUSE;CD2AP_MOUSE		49.0011	34.146	52.8992	44.373	42.2695	65.3362	40.175	32.669	35.5011	38.4772	20.4962	49.9894	41.301	46.3318	57.9751	84.9804
Gm49804	diphosphoinositol-polyphosphate diphosphatase	A0A3B2W864_MOUSE		1166.51	1080.36	867.094	926.749	1196.92	1035.95	974.195	908.906	1133.58	1142.23	886.306	887.549	1230.89	1140.49	1121.96	971.909
Tcp11	T-complex protein 11 (Fragment)	A0A3B2WAQ3_MOUSE		708.438	727.632	412.709	529.064	768.452	875.986	667.66	624.959	443.173	365.012	671.474	629.187	681.499	742.052	102.929	161.429
Anks1	Ankyrin repeat and SAM domain containing 1	A0A3B2WAQ7_MOUSE		526.962	472.028	505.015	521.021	518.068	482.848	493.646	498.384	464.792	454.028	460.208	445.779	458.11	428.088	470.239	496.76
Nfkbie	Nuclear factor of kappa light polypeptide gene enhancer in B cells inhibitor, epsilon;NF-kappa-B inhibitor epsilon;Uncharacterized protein	A0A3B2WAY2_MOUSE;IKBE_MOUSE;Q3U9Q0_MOUSE		60.3978	58.981	51.1445	40.6349	54.5915	74.2445	50.3708	46.576	79.8431	36.4849	48.9968	33.4918	31.8931	31.1146	39.2393	37.1399
Mea1	Male-enhanced antigen 1 (Fragment);Male-enhanced antigen 1;Male-enhanced antigen 1	A0A3B2WB12_MOUSE;MEA1_MOUSE;Q9DB93_MOUSE		1129.31	1074.92	1178.46	1102.53	968.788	1025.88	855.903	902.789	1058.45	1084.23	1005.45	992.18	871.42	891.551	1031.74	1015.95
Brwd1;Phip;Phip;Brwd1;Brwd1	Bromodomain and WD repeat domain containing 1 (Fragment);Pleckstrin homology domain interacting protein;PH-interacting protein;Bromodomain and WD repeat-containing protein 1;Isoform B of Bromodomain and WD repeat-containing protein 1	A0A3B2WB73_MOUSE;F8VQ93_MOUSE;PHIP_MOUSE;BRWD1_MOUSE;BRWD1_MOUSE		NaN	24.499	16.2518	6.74412	NaN	NaN	19.422	14.8877	NaN	NaN	NaN	NaN	4.98122	NaN	13.5611	12.9508
Polr2m	Polymerase (RNA) II (DNA directed) polypeptide M	A0A3B2WBC6_MOUSE		36.7092	41.6582	20.0281	27.1261	29.5161	21.1698	23.4661	26.9827	28.1206	35.4638	25.0889	48.2805	27.7438	32.0638	40.3283	56.1051
Epb41l3	Erythrocyte membrane protein band 4.1 like 3 (Fragment);Isoform 7 of Band 4.1-like protein 3	A0A3B2WBE1_MOUSE;E41L3_MOUSE		95.4027	118.441	74.7046	54.2322	77.7713	90.1273	69.5589	21.4647	139.441	117.719	92.3086	78.6829	129.765	75.3064	148.553	90.2518
Tjp2	Tight junction protein 2;Tight junction protein 2;Tight junction protein ZO-2	A0A3B2WBH9_MOUSE;A0A3B2WCN9_MOUSE;ZO2_MOUSE		154.51	135.128	148.912	132.153	132.409	154.96	138.801	134.169	106.576	103.436	113.098	106.874	138.856	144.116	148.872	151.67
Rpl10a	Ribosomal protein	A0A3B2WBL1_MOUSE;Q5XJF6_MOUSE		639.697	598.158	341.723	345.096	612.376	529.335	441.503	431.606	361.399	357.321	277.068	321.741	618.237	595.189	372.582	432.944
Khsrp	KH-type splicing regulatory protein;Far upstream element-binding protein 2	A0A3B2WCD8_MOUSE;FUBP2_MOUSE		4650.78	4627.24	4872.95	5005.21	4329.44	4331.75	4916.58	4830.17	4996.16	4849.53	5293.75	5351.51	5167.4	5358.23	5252.19	5504.87
Ranbp3	RAN binding protein 3;Ran-binding protein 3	A0A3B2WCL5_MOUSE;RANB3_MOUSE		608.105	574.743	693.883	679.582	656.062	639.466	617.274	643.353	734.416	702.721	735.922	800.592	660.68	645.784	748.549	704.041
Dlgap1	DLG associated protein 1	A0A3B2WD59_MOUSE		NaN	380.997	204.29	210.375	340.628	317.81	298.334	118.624	NaN	NaN	NaN	NaN	NaN	NaN	NaN	NaN
Lclat1	Lysocardiolipin acyltransferase 1 (Fragment);Lclat1 protein;Lysocardiolipin acyltransferase 1	A0A3B2WDB3_MOUSE;B0V2Q7_MOUSE;LCLT1_MOUSE		478.38	481.968	416.6	400.803	314.333	342.292	335.374	315.468	469.434	472.645	468.266	498.849	382.668	394.707	453.932	352.921
Bin1	Bridging integrator 1;Isoform 2 of Myc box-dependent-interacting protein 1	A0A3Q4EBK4_MOUSE;BIN1_MOUSE		147.053	184.685	266.068	225.404	124.085	162.489	84.4354	163.943	132.435	149.74	94.0146	125.43	136.817	184.956	177.879	185.868
Thumpd2	THUMP domain containing 2;THUMP domain-containing protein;THUMP domain-containing protein 2	A0A3Q4EBZ8_MOUSE;Q8BSI5_MOUSE;THUM2_MOUSE		NaN	NaN	15.3867	44.1534	NaN	NaN	NaN	35.3758	41.6046	53.1702	71.1306	52.71	28.5842	44.2931	NaN	48.3573
Impact	Impact, RWD domain protein (Fragment)	A0A3Q4EC12_MOUSE		5215.6	5378.62	5617.8	5789.36	6289.94	6054.95	5731.14	5985.12	5869.82	5680.81	6255.38	6201.03	6442.2	6334.12	6101.47	6577.08
Mtch1	Mitochondrial carrier 1 (Fragment);Mitochondrial carrier 1 (Fragment);Mitochondrial carrier 1 (Fragment);Mitochondrial carrier homolog 1;Isoform 2 of Mitochondrial carrier homolog 1;Mitochondrial carrier homolog 1	A0A3Q4EC24_MOUSE;A0A3Q4EGL4_MOUSE;D3YXC2_MOUSE;MTCH1_MOUSE;MTCH1_MOUSE;Q8CEY5_MOUSE		89.1938	80.4064	70.746	66.2825	45.4525	43.4215	40.5754	58.1396	59.9591	54.9828	26.4765	51.3171	82.6037	91.3499	49.5283	48.1024
Ttc39c	Tetratricopeptide repeat domain 39C	A0A3Q4EGC9_MOUSE		1043.17	1026.51	879.824	837.32	806.747	827.804	834.86	844.935	1011.14	1024.06	752.192	760.34	1195.13	1185.46	763.974	804.792
Gfer	Sulfhydryl oxidase;FAD-linked sulfhydryl oxidase ALR	A0A3Q4EGL6_MOUSE;ALR_MOUSE		138.017	114.26	120.881	97.7043	81.3485	83.8246	68.9097	78.259	59.5773	86.3161	90.1924	96.8471	84.7761	70.0597	138.982	105.012
Ss18	SS18, nBAF chromatin remodeling complex subunit;Protein SSXT;SS18 N-terminal domain-containing protein;SS18, nBAF chromatin remodeling complex subunit;SS18, nBAF chromatin remodeling complex subunit;SS18, nBAF chromatin remodeling complex subunit;Synovial sarcoma associated SS18-beta;Synovial sarcoma associated SS18-gamma	A0A3Q4EGQ6_MOUSE;SSXT_MOUSE;Q8BJH8_MOUSE;Q8BJJ6_MOUSE;Q8BKL1_MOUSE;Q8VHA8_MOUSE;Q8VHA9_MOUSE;Q8VHB0_MOUSE		94.1629	91.4978	76.6863	69.4797	69.1237	52.1109	49.3892	67.632	63.2751	78.9103	63.4179	76.8289	88.0647	66.2597	108.494	103.759
Map4k3	Mitogen-activated protein kinase kinase kinase kinase 3	A0A3Q4EGQ9_MOUSE		227.879	202.427	199.592	194.221	239.179	264.4	213.989	223.412	206.656	204.862	203.795	201.687	205.935	213.238	237.284	159.381
Srsf7	Serine and arginine-rich splicing factor 7;Serine and arginine-rich splicing factor 7;Serine and arginine-rich splicing factor 7;Serine/arginine-rich splicing factor 7;Serine/arginine-rich splicing factor 7;Isoform 2 of Serine/arginine-rich splicing factor 7;Isoform 3 of Serine/arginine-rich splicing factor 7;Isoform 4 of Serine/arginine-rich splicing factor 7	A0A3Q4EH04_MOUSE;A0A3Q4L335_MOUSE;A0A3Q4L393_MOUSE;Q3THA6_MOUSE;SRSF7_MOUSE;SRSF7_MOUSE;SRSF7_MOUSE;SRSF7_MOUSE		282.871	308.16	280.135	286.897	242.292	265.599	299.82	341.084	255.887	253.832	254.286	248.402	213.953	245.231	376.858	315.642
BC004004;BC004004;BC004004;	cDNA sequence BC004004;cDNA sequence BC004004;cDNA sequence BC004004;Bombesin receptor-activated protein C6orf89 homolog	A0A3Q4EI31_MOUSE;A0A3Q4L2X7_MOUSE;A0A3Q4L309_MOUSE;CF089_MOUSE		NaN	NaN	74.7234	NaN	NaN	NaN	NaN	NaN	NaN	50.7653	80.3808	53.4231	29.4658	NaN	48.2184	40.4825
Nubp2	Nucleotide binding protein 2;Cytosolic Fe-S cluster assembly factor NUBP2	A0A3Q4L2S1_MOUSE;NUBP2_MOUSE		502.203	481.612	464.364	502.628	397.943	460.257	400.129	406.36	468.372	457.549	473.08	466.675	469.075	486.3	604.501	626.702
Cacna2d3	Voltage-dependent calcium channel alpha2/delta-3 transcript variant;Voltage-dependent calcium channel subunit alpha-2/delta-3	A0A411ACY3_MOUSE;CA2D3_MOUSE		166.359	175.241	143.083	141.996	136.664	108.777	115.621	119.081	143.474	145.632	136.314	136.866	163.329	163.644	166.505	167.196
Cacna2d1	Voltage-dependent calcium channel alpha2/delta-1 transcript variant 2;Isoform 2E of Voltage-dependent calcium channel subunit alpha-2/delta-1	A0A411ACY8_MOUSE;CA2D1_MOUSE		527.227	494.879	456.336	431.518	377.291	393.446	369.863	382.081	491.276	509.534	532.679	501.549	521.547	551.184	501.666	531.57
Cacna2d2	Voltage-dependent calcium channel alpha2/delta-2 transcript variant 1;Isoform 2 of Voltage-dependent calcium channel subunit alpha-2/delta-2;Isoform 4 of Voltage-dependent calcium channel subunit alpha-2/delta-2	A0A411ACZ2_MOUSE;CA2D2_MOUSE;CA2D2_MOUSE		103.664	88.7198	91.1889	90.1776	47.2564	50.261	61.7875	54.2481	81.9882	65.3434	64.7253	61.3503	97.002	92.8236	100.213	98.6594
Slc39a3	Zinc transporter ZIP3	A0A452J893_MOUSE;S39A3_MOUSE		175.562	197.134	97.0332	131.616	93.0763	116.302	92.5723	121.468	88.62	78.1924	84.4466	81.5289	86.0032	104.16	112.682	95.6789
Nrxn2	Neurexin II;Nrxn2 protein;Neurexin II;Neurexin II;Neurexin-2;Neurexin-2-beta	A0A494B8Y4_MOUSE;B2RX09_MOUSE;E9PUM9_MOUSE;E9Q5N7_MOUSE;NRX2A_MOUSE;Q3UGZ9_MOUSE		164.892	177.138	133.209	139.132	152.44	154.794	127.597	124.397	120.879	130.887	133.263	142.121	142.586	144	129.323	152.334
Yif1a	Protein YIF1;Protein YIF1;Protein YIF1A	A0A494B8Y8_MOUSE;A0A494BA88_MOUSE;YIF1A_MOUSE		56.2807	NaN	37.0288	58.7941	NaN	54.3671	NaN	44.3415	50.3749	46.2744	47.28	66.5205	55.5472	41.6127	70.1158	64.584
Oga	O-GlcNAcase	A0A494B913_MOUSE		NaN	NaN	26.0582	NaN	NaN	NaN	NaN	NaN	NaN	NaN	16.6808	NaN	36.5685	12.3893	37.4213	48.1289
Hspa12a	Heat shock protein 12A (Fragment)	A0A494B917_MOUSE		150.424	221.631	314.277	267.537	801.45	664.069	590.925	635.444	349.167	387.382	1037.57	1094.09	461.014	619.137	578.319	683.431
Papss2	3'-phosphoadenosine 5'-phosphosulfate synthase 2;3'-phosphoadenosine 5'-phosphosulfate synthase 2;Bifunctional 3'-phosphoadenosine 5'-phosphosulfate synthase 2	A0A494B923_MOUSE;A0A494BB18_MOUSE;PAPS2_MOUSE		53.3061	67.3015	35.5862	50.3161	44.7101	NaN	43.6742	61.1495	47.0946	57.1066	41.1212	NaN	36.2584	30.7464	57.0561	45.2213
Nedd4l	HECT-type E3 ubiquitin transferase	A0A494B953_MOUSE		2696.89	2866.39	2763.96	2775.62	2782.76	2854.87	2916.26	3043.81	2788.22	2854.71	2982.12	3001.7	2644.84	2622.34	2993.11	2843.32
Gm45928;Pold4;Pold4	Predicted gene, 45928;Small subunit DNA polymerase delta p12;DNA polymerase delta subunit 4	A0A494B974_MOUSE;Q547B4_MOUSE;DPOD4_MOUSE		NaN	NaN	53.0428	42.2956	46.8279	71.5241	45.8232	43.2173	62.9094	48.0751	56.7457	46.5715	41.7969	36.2873	61.4429	44.5107
Ddb1	DNA damage-binding protein 1	A0A494B987_MOUSE		30.196	35.5489	16.0377	14.0583	NaN	27.4786	27.9027	21.96	25.6919	25.74	30.2562	18.6609	44.8724	39.7832	39.9186	29.5744
Lpxn	Leupaxin;Lpxn protein;Leupaxin	A0A494B990_MOUSE;Q8R355_MOUSE;LPXN_MOUSE		77.3804	NaN	20.4097	50.1838	NaN	33.7636	43.3102	55.7721	NaN	54.8215	60.5544	48.9104	72.415	70.9275	81.8143	54.215
Sdhaf2	Succinate dehydrogenase assembly factor 2, mitochondrial;Succinate dehydrogenase assembly factor 2, mitochondrial	A0A494B9B9_MOUSE;SDHF2_MOUSE		117.839	153.456	127.51	151.93	120.179	119.696	115.796	123.249	152.751	161.607	127.572	156.791	93.3025	106.901	144.878	127.569
Vps13a	Vacuolar protein sorting 13A (Fragment);Uncharacterized protein Vps13a 3' variant II (Fragment)	A0A494B9C3_MOUSE;A1ILI2_MOUSE		279.591	221.86	198.601	219.891	259.272	299.007	276.999	245.934	291.485	268.342	303.399	288.561	251.895	266.978	377.664	413.089
Rsph1	Radial spoke head 1 homolog (Chlamydomonas);Radial spoke head 1 homolog (Chlamydomonas);TSGA2;TSGA2;Radial spoke head 1 homolog	A0A494B9F6_MOUSE;Q3YEA0_MOUSE;Q3YEA4_MOUSE;Q3YEA6_MOUSE;RSPH1_MOUSE		79.6895	108.973	56.0593	48.9412	117.339	91.1969	62.4839	70.2154	44.889	53.1736	39.0802	43.1337	68.3339	71.3585	52.2138	81.3496
Prelid3a	PRELI domain containing 3A (Fragment);PRELI domain containing protein 3A	A0A494B9F8_MOUSE;PLD3A_MOUSE		263.87	250.419	197.68	212.647	159.764	159.549	180.743	148.464	201.945	205.658	177.782	179.829	147.672	166.708	161.066	171.15
Phf1	PHD finger protein 1	A0A494B9I3_MOUSE;A0A494BBE6_MOUSE;PHF1_MOUSE		100.405	87.3558	88.1258	94.2427	86.9758	103.324	91.683	100.632	91.8838	84.7382	87.8442	84.7728	85.5758	84.9748	89.5344	92.7858
Akap8l	A kinase (PRKA) anchor protein 8-like;C2H2 AKAP95-type domain-containing protein;A kinase (PRKA) anchor protein 8-like;C2H2 AKAP95-type domain-containing protein;A-kinase anchor protein 8-like	A0A494B9L0_MOUSE;Q3TLG2_MOUSE;Q5RL57_MOUSE;Q9D0K8_MOUSE;AKP8L_MOUSE		362.45	371.459	292.711	297.824	324.741	365.619	326.723	336.663	211.112	224.974	215.739	240.903	256.509	284.352	327.203	319.521
Btbd9	BTB/POZ domain-containing protein 9 (Fragment);BTB/POZ domain-containing protein 9;BTB/POZ domain-containing protein 9;BTB/POZ domain-containing protein 9 (Fragment)	A0A494B9M3_MOUSE;Q3U4Z0_MOUSE;BTBD9_MOUSE;Q8CDU2_MOUSE		75.3958	81.004	74.8524	63.1679	99.9602	79.2263	80.547	79.4709	61.9432	74.606	69.4466	48.1001	49.0454	67.9419	49.8967	65.8784
Nme4	Nucleoside diphosphate kinase (Fragment);Nucleoside diphosphate kinase (Fragment);Nucleoside diphosphate kinase;Nucleoside diphosphate kinase;Nucleoside diphosphate kinase (Fragment);Nucleoside diphosphate kinase, mitochondrial	A0A494B9P5_MOUSE;A0A494BA70_MOUSE;A0A494BA94_MOUSE;A0A494BBQ2_MOUSE;Q9CS68_MOUSE;NDKM_MOUSE		NaN	70.884	34.7143	50.8856	32.4864	NaN	NaN	NaN	59.9356	76.3494	52.4226	84.6179	44.1617	NaN	NaN	24.1693
Cnih2	Cornichon family AMPA receptor auxiliary protein 2;Protein cornichon homolog 2;Protein cornichon homolog 2	A0A494B9S6_MOUSE;CNIH2_MOUSE;Q3SYI8_MOUSE		87.8941	NaN	45.4924	49.7278	35.6857	61.8401	32.6964	28.4591	41.3987	66.2574	58.859	56.2776	78.1502	71.1405	NaN	49.9649
Pknox1	Pbx/knotted 1 homeobox;Homeobox protein PKNOX1	A0A494B9U0_MOUSE;PKNX1_MOUSE		NaN	NaN	61.5214	56.6413	NaN	42.1448	28.8063	29.4398	NaN	NaN	48.788	55.9025	54.2578	34.1528	46.7366	NaN
Ptar1	Protein prenyltransferase alpha subunit repeat containing 1	A0A494B9V8_MOUSE		1013	941.433	1012.67	999.914	1178.32	1156.36	1066.73	1095.38	1094.67	1062.97	1108.08	1092.7	955.103	1039.53	975.803	1040.08
Fermt3	Fermitin family member 3;PH domain-containing protein;Fermt3 protein;Fermitin family homolog 3	A0A494B9W3_MOUSE;Q3TEE6_MOUSE;Q6NXZ9_MOUSE;URP2_MOUSE		36.4385	30.8507	40.3702	42.4063	NaN	43.1538	37.1636	44.6366	41.9462	44.5837	35.6899	25.7841	35.6381	43.8734	49.7186	58.2286
Fau;Fau;Fau;Fau;fau;fau	40S ribosomal protein S30;Finkel-Biskis-Reilly murine sarcoma virus (FBR-MuSV) ubiquitously expressed (fox derived);Ubiquitin-like FUBI-ribosomal protein eS30 fusion protein;Ubiquitin-like domain-containing protein;Fau protein (Fragment);Fau protein (Fragment)	A0A494B9Z0_MOUSE;A0A494BBA8_MOUSE;RS30_MOUSE;Q3THB2_MOUSE;Q91V99_MOUSE;Q920W8_MOUSE		839.138	839.056	491.982	434.349	912.995	1049.88	633.186	595.512	580.343	590.945	374.945	390.704	710.786	709.94	661.185	604.142
Rela	V-rel reticuloendotheliosis viral oncogene homolog A (avian);Transcription factor p65;RHD domain-containing protein;Nuclear transcription factor RelA;RHD domain-containing protein	A0A494BA44_MOUSE;TF65_MOUSE;Q3U3Q8_MOUSE;Q548Y4_MOUSE;Q8BTL4_MOUSE		536.26	531.145	507.512	556.765	540.997	563.411	568.327	579.93	519.377	510.775	551.279	561.287	537.906	538.074	544.083	542.499
Ehbp1l1	EH domain binding protein 1-like 1;EH domain binding protein 1-like 1;Isoform 2 of EH domain-binding protein 1-like protein 1	A0A494BA91_MOUSE;E9QP49_MOUSE;EH1L1_MOUSE		41.2652	35.0547	31.2648	26.8451	39.3313	38.4331	35.316	30.887	26.9822	31.0912	24.56	24.9393	32.9793	31.3083	39.0231	42.0401
Ostf1	Osteoclast-stimulating factor 1	A0A494BA97_MOUSE;OSTF1_MOUSE		42.1431	46.6644	49.9784	47.8394	59.6283	41.9118	59.3656	57.3338	32.4646	36.9992	47.1253	47.137	53.8276	60.8886	71.1365	64.7754
Atad1	Outer mitochondrial transmembrane helix translocase	A0A494BAB5_MOUSE;ATAD1_MOUSE		154.124	156.812	85.6712	104.132	93.8185	82.6606	83.9229	58.776	84.9702	82.1972	78.9033	76.1526	89.8228	76.0259	127.878	111.521
Slc29a2	Solute carrier family 29 (nucleoside transporters), member 2;Solute carrier family 29 (nucleoside transporters), member 2;Equilibrative nucleoside transporter 2	A0A494BAC3_MOUSE;A0A498WFQ1_MOUSE;S29A2_MOUSE		125.286	138.222	99.8582	110.312	58.9914	64.8577	82.2684	110.799	97.9052	88.8671	160.784	71.2628	123.889	103.481	143.918	136.585
Ddb1	DNA damage-binding protein 1 (Fragment)	A0A494BAF6_MOUSE		93.3759	95.8992	72.3411	88.8328	84.8993	81.4923	60.5271	76.3264	42.4449	85.8394	65.8994	71.375	61.5874	33.8064	95.4638	83.3791
Fech	Ferrochelatase;Ferrochelatase, mitochondrial;Ferrochelatase	A0A494BAI5_MOUSE;HEMH_MOUSE;Q8C3V7_MOUSE		611.707	653.331	665.457	638.446	505.377	492.486	528.974	527.213	884.935	844.473	892.762	885.844	626.282	619.749	661.16	713.128
Arl3	ADP-ribosylation factor-like protein 3	A0A494BAJ6_MOUSE;Q543P7_MOUSE;ARL3_MOUSE		344.586	321.035	221.707	267.369	262.825	259.267	259.305	290.388	365.612	315.535	269.332	259.094	271.418	294.756	307.058	277.963
Ergic1	Endoplasmic reticulum-Golgi intermediate compartment protein;Endoplasmic reticulum-Golgi intermediate compartment protein;Endoplasmic reticulum-Golgi intermediate compartment protein (Fragment);Endoplasmic reticulum-Golgi intermediate compartment protein 1	A0A494BAK4_MOUSE;Q4FK22_MOUSE;Q69ZP5_MOUSE;ERGI1_MOUSE		378.706	352.599	291.936	308.563	265.226	254.747	249.638	265.331	273.745	276.119	341.097	314.676	299.96	283.407	316.272	305.882
Nedd4l	Neural precursor cell expressed, developmentally down-regulated gene 4-like (Fragment)	A0A494BAL4_MOUSE		265.572	355.716	406.138	296.697	242.795	276.626	301.555	299.056	278.746	202.045	307.664	313.747	352.8	437.061	450.041	361.524
Pstpip2	Proline-serine-threonine phosphatase-interacting protein 2;F-BAR domain-containing protein;Pstpip2 protein;Proline-serine-threonine phosphatase-interacting protein 2	A0A494BAM6_MOUSE;Q3U4E4_MOUSE;Q4FJU4_MOUSE;PPIP2_MOUSE		NaN	70.0287	23.7093	26.7698	30.6684	28.1674	13.077	33.1156	12.8836	28.0368	29.7511	24.1867	14.6407	NaN	37.2566	44.3823
Csnk1g3	Casein kinase I isoform gamma-3	A0A494BAP2_MOUSE;KC1G3_MOUSE		120.846	138.328	98.3573	111.575	101.661	99.8407	83.5443	90.4016	110.353	106.446	86.3909	85.039	96.9701	98.4489	118.108	109.975
Nars1	asparagine--tRNA ligase (Fragment)	A0A494BAX5_MOUSE		10392.9	12314.1	9242.85	7925.42	24575.4	23686.4	19772	19297.6	11524	10956.3	18438.7	20516.5	17350.9	17063.6	1174.73	1038.03
Fkbp2	FK506 binding protein 2	A0A494BAX7_MOUSE		NaN	22.0291	7.9853	21.0807	13.3841	18.7351	19.9198	21.9274	17.9097	19.0221	14.833	13.2085	NaN	25.1968	28.0097	21.014
Gm50478	Predicted gene, 50478	A0A494BB10_MOUSE		81.3338	89.3697	54.8172	68.9127	69.4358	81.9052	71.8021	63.3368	46.1071	50.6474	59.6085	45.0856	40.5111	67.9165	55.5538	62.7049
Wdr26	WD repeat-containing protein 26	A0A494BB75_MOUSE		3956.61	4041.3	3097.59	3125.05	4785.95	4907.95	4238.44	4081.89	4098.37	4143.9	3584.51	3522.45	4319.62	4263.51	3578.45	3620.1
Nars1	Asparagine--tRNA ligase, cytoplasmic	A0A494BB89_MOUSE		220.309	216.161	299.504	322.749	429.38	412.441	302.191	356.015	90.6232	117.268	326.079	319.476	389.049	357.595	87.9843	77.8008
Eif1a	Eukaryotic translation initiation factor 4C;Eukaryotic translation initiation factor 4C;Eukaryotic translation initiation factor 4C;Eukaryotic translation initiation factor 1A	A0A494BB95_MOUSE;Q3UC76_MOUSE;Q4FJR7_MOUSE;IF1A_MOUSE		472.836	460.26	348.363	329.297	653.439	565.203	579.743	556.562	435.637	450.757	352.68	356.363	492.613	486.251	421.37	385.263
Spindoc	Spindlin interactor and repressor of chromatin binding (Fragment);Spindlin interactor and repressor of chromatin-binding protein;Isoform 2 of Spindlin interactor and repressor of chromatin-binding protein	A0A494BBB2_MOUSE;SPNDC_MOUSE;SPNDC_MOUSE		54.057	57.1774	84.7999	56.3354	33.1198	53.433	44.0629	40.6198	54.6467	47.7058	57.8904	38.6612	50.3986	58.3381	NaN	NaN
Bad	BCL2-associated agonist of cell death	A0A494BBC4_MOUSE;Q3U9H3_MOUSE		476.132	583.884	630.49	553.553	352.302	335.664	387.057	406.182	391.07	569.051	395.431	371.352	438.314	393.175	679.278	617.189
Scyl1	N-terminal kinase-like protein (Fragment);N-terminal kinase-like protein;N-terminal kinase-like protein	A0A494BBD3_MOUSE;SCYL1_MOUSE;R4H4Y7_MOUSE		2629.21	2739.6	2925.88	2830.14	2872.41	2943.46	2864.59	2990.55	2294.61	2345.43	2724.95	2646.64	2590.22	2632.06	3174.64	3177.51
Anxa1	Annexin;Annexin;Annexin A1;Annexin;Annexin;Annexin;Annexin	A0A494BBD8_MOUSE;B7STB7_MOUSE;ANXA1_MOUSE;Q3U5N9_MOUSE;Q3US43_MOUSE;Q4FJV4_MOUSE;Q4FK88_MOUSE		272.444	122.008	NaN	22.436	74.1569	106.005	50.5425	52.3395	NaN	NaN	NaN	NaN	53.3815	67.303	44.752	NaN
Efemp2	Epidermal growth factor-containing fibulin-like extracellular matrix protein 2;Epidermal growth factor-containing fibulin-like extracellular matrix protein 2;EGF-like domain-containing protein;EGF-containing fibulin-like extracellular matrix protein 2;EGF-containing fibulin-like extracellular matrix protein 2	A0A494BBF0_MOUSE;G5E8D6_MOUSE;Q542X5_MOUSE;Q9JM06_MOUSE;FBLN4_MOUSE		45.3809	35.9904	33.6068	29.3082	21.2676	28.027	22.1729	23.9714	35.6892	36.4711	37.6435	32.3718	27.847	22.3264	40.4477	53.5116
Mrpl28	Large ribosomal subunit protein bL28m	A0A494BBN2_MOUSE;RM28_MOUSE		204.118	183.487	128.615	156.61	180.571	205.671	141.083	149.079	189.182	187.739	170.214	145.761	178.694	196.591	137.916	150.17
Ubxn1	UBX domain protein 1;UBX domain-containing protein 1	A0A498WFS2_MOUSE;UBXN1_MOUSE		256.096	249.757	273.822	288.397	245.317	285.687	242.266	255.481	305.938	340.672	290.477	259.175	248.177	281.749	298.665	378.588
Txnl1	Thioredoxin-like 1;PITH domain-containing protein;Thioredoxin-like protein 1	A0A498WGD8_MOUSE;Q3U8R9_MOUSE;TXNL1_MOUSE		440.325	419.325	471.631	484.779	485.102	534.014	557.954	542.196	514.317	513.567	543.742	554.377	517.279	511.107	539.308	535.71
Phf21a	PHD finger protein 21A;PHD finger protein 21A;PHD finger protein 21A;Isoform 3 of PHD finger protein 21A;Isoform 6 of PHD finger protein 21A;Isoform 8 of PHD finger protein 21A	A0A498WGG5_MOUSE;A2AHG4_MOUSE;PF21A_MOUSE;PF21A_MOUSE;PF21A_MOUSE;PF21A_MOUSE		40.4129	31.0847	28.9617	24.5862	23.6726	27.5221	24.9753	27.8376	33.4247	35.163	26.2042	24.6104	30.838	29.8451	38.0274	42.9242
Tm9sf3	Transmembrane 9 superfamily member;Transmembrane 9 superfamily member (Fragment);Transmembrane 9 superfamily member;Transmembrane 9 superfamily member 3	A0A498WGK6_MOUSE;Q571B0_MOUSE;Q8C6F5_MOUSE;TM9S3_MOUSE		NaN	39.9477	28.512	39.3667	56.8645	65.6751	38.473	45.8801	NaN	NaN	45.8019	36.3997	49.5659	54.0629	NaN	NaN
Syt7	Synaptotagmin VII	A0A498WGM0_MOUSE		327.689	317.714	312.26	320.376	277.758	287.045	265.608	284.905	265.441	262.712	285.356	308.781	288.151	281.426	306.158	273.833
IGLC2	IgL2 (Fragment)	A0A4E9FSP6_MOUSE		131.11	127.939	50.2619	75.4971	112.291	68.8948	91.8311	77.4484	85.2845	108.259	96.2183	72.9441	89.4427	78.5989	76.4542	85.1528
IGHG3	IgG3 (Fragment)	A0A4E9FT70_MOUSE		248.4	277.422	87.3464	100.791	173.95	192.796	108.464	100.714	150.977	112.404	125.883	130.268	113.809	126.95	49.8154	45.9168
IGHG2	IgG2 (Fragment)	A0A4E9G461_MOUSE		295.926	308.088	144.507	136.106	284.998	264.728	215.394	157.776	132.759	260.157	167.385	191.784	188.115	258.69	NaN	336.279
Mapkapk2	MK2 long isoform;MAP kinase-activated protein kinase 2;Protein kinase domain-containing protein	A0A4P3APB9_MOUSE;MAPK2_MOUSE;Q3U2P8_MOUSE		92.3739	72.9329	58.9862	85.4472	72.2207	66.0529	89.3759	82.0698	78.7871	67.7203	77.8994	78.6706	86.0925	67.0372	97.2245	102.891
Negr1	Neuronal growth regulator 1	A0A4W9_MOUSE;D3Z4T6_MOUSE;NEGR1_MOUSE		1063.7	942.277	947.943	990.01	890.947	916.37	900.438	836.324	1008.91	1085.45	1238.58	1121.19	1167.34	1220	1095.17	1343.36
Ube4b	Ubiquitin conjugation factor E4	A0A571BD95_MOUSE		2157.9	2093.53	2078.89	2112.73	2183.01	2201.05	2156.56	2173.39	2237.57	2185.26	2215.89	2188.14	1948.35	2042.67	2403.57	2311.79
Srcin1	SRC kinase signaling inhibitor 1	A0A571BDG0_MOUSE		917.575	953.622	764.167	775.145	1025.66	1033.12	897.975	925.603	483.311	498.301	434.266	429.353	466.846	477.56	430.997	448.098
Tmub1	Transmembrane and ubiquitin-like domain containing 1;Transmembrane and ubiquitin-like domain-containing protein 1 (Fragment);Transmembrane and ubiquitin-like domain containing 1 (Fragment);Transmembrane and ubiquitin-like domain-containing protein 1;Transmembrane and ubiquitin-like domain-containing protein 1;Isoform 2 of Transmembrane and ubiquitin-like domain-containing protein 1	A0A571BDL1_MOUSE;D3Z108_MOUSE;D3Z5X7_MOUSE;E9QN77_MOUSE;TMUB1_MOUSE;TMUB1_MOUSE		463.263	299.865	425.878	405.787	386.521	356.953	385.196	404.935	424.872	407.438	423.345	494.087	461.55	386.232	246.485	247.556
Aak1	AP2 associated kinase 1 (Fragment)	A0A571BDM4_MOUSE		391.027	376.563	445.368	495.385	324.803	245.208	378.808	402.283	307.007	332.809	261.852	276.074	257.731	226.372	134.41	316.6
Rab3il1	RAB3A interacting protein (rabin3)-like 1;RAB3A interacting protein (rabin3)-like 1;Guanine nucleotide exchange factor for Rab-3A	A0A571BDP7_MOUSE;D3YZ86_MOUSE;R3GEF_MOUSE		340.467	332.022	307.074	306.197	328.711	354.108	331.973	307.676	306.084	374.53	344.513	336.044	366.997	387.269	560.493	529.748
Zfp827;Zfp827;Znf827	Zinc finger protein 827	A0A571BE87_MOUSE;G5E8U2_MOUSE;ZN827_MOUSE		47.5803	56.6276	38.1709	43.8026	45.6566	42.0277	31.9895	41.0834	38.7249	33.2081	30.2866	32.4819	25.1233	31.9091	45.4037	38.3722
Crtac1	Cartilage acidic protein 1	A0A571BE99_MOUSE;CRAC1_MOUSE		322.121	275.916	344.899	317.225	285.435	359.52	347.196	341.025	353.083	340.222	393.964	366.211	422.623	374.504	364.822	337.606
Plin4	Perilipin 4;Perilipin-4;Isoform 2 of Perilipin-4	A0A571BEC9_MOUSE;PLIN4_MOUSE;PLIN4_MOUSE		NaN	NaN	NaN	NaN	29.9759	NaN	42.6244	43.5378	26.9138	42.577	40.5827	32.7178	51.3177	45.0911	42.9934	44.787
Rap1gap2	RAP1 GTPase activating protein 2	A0A571BED8_MOUSE		3263.94	3356.97	3424.93	3465.4	3598.7	3767.98	3652.79	3715.7	3599.84	3710.76	3584.21	3548.88	3397.35	3460.24	3438.16	3315.97
Ralgds	Ral guanine nucleotide dissociation stimulator;Ral guanine nucleotide dissociation stimulator;Ral guanine nucleotide dissociation stimulator;Ral guanine nucleotide dissociation stimulator;Ral guanine nucleotide dissociation stimulator;Ral guanine nucleotide dissociation stimulator;MKIAA1308 protein (Fragment)	A0A571BEH0_MOUSE;A2AK33_MOUSE;GNDS_MOUSE;Q3TWC1_MOUSE;Q3TXZ3_MOUSE;Q3UQY9_MOUSE;Q6ZPU1_MOUSE		45.8098	68.5074	63.6548	68.2528	70.8342	72.0064	65.2199	68.7906	74.6026	58.4654	71.6188	47.788	94.6613	103.008	85.944	81.3282
Aak1	AP2 associated kinase 1 (Fragment)	A0A571BEI2_MOUSE		255.724	323.307	306.956	313.541	422.57	390.179	415.133	359.693	235.542	262.07	262.923	258.255	322.337	289.344	277.883	285.998
Gnas	GNAS (guanine nucleotide binding protein, alpha stimulating) complex locus;Guanine nucleotide-binding protein G(s) subunit alpha isoforms short;Isoform Gnas-3 of Guanine nucleotide-binding protein G(s) subunit alpha isoforms short;Guanine nucleotide-binding protein G(s) subunit alpha isoforms XLas	A0A571BEI3_MOUSE;GNAS2_MOUSE;GNAS2_MOUSE;GNAS1_MOUSE		771.187	728.354	702.942	739.737	540.025	611.515	573.686	538.768	679.768	644.429	769.546	744.167	712.339	718.276	807.379	767.952
Rnf130	Ring finger protein 130;Ring finger protein 130;E3 ubiquitin-protein ligase RNF130	A0A571BES6_MOUSE;Q5SVR5_MOUSE;GOLI_MOUSE		156.77	103.088	136.02	155.079	191.863	109.15	127.195	124.38	143.173	157.309	149.942	139.335	153.958	149.804	NaN	NaN
Kcnip1	Kv channel-interacting protein 1;Potassium channel interacting protein 1;Kv channel-interacting protein 1;Potassium channel interacting protein 1;Kv channel-interacting protein 1;Isoform 2 of Kv channel-interacting protein 1;Isoform 3 of Kv channel-interacting protein 1;Isoform 4 of Kv channel-interacting protein 1	A0A571BET8_MOUSE;Q3YAB4_MOUSE;Q3YAB5_MOUSE;Q3YAB6_MOUSE;KCIP1_MOUSE;KCIP1_MOUSE;KCIP1_MOUSE;KCIP1_MOUSE		123.248	159.406	120.241	135.843	164.401	82.6643	124.568	97.7003	171.526	120.762	109.011	111.933	111.353	153.055	174.756	178.327
Dlg2	Discs large MAGUK scaffold protein 2	A0A571BEZ4_MOUSE		NaN	NaN	22.5956	33.2855	NaN	16.7608	23.8801	17.2776	47.2622	59.1334	24.7054	21.301	15.6424	30.9159	69.1587	64.6625
Wasf3	WASP family, member 3 (Fragment)	A0A571BF78_MOUSE		303.212	267.939	281.149	302.679	394.287	468.123	264.839	282.901	201.371	227.369	335.218	220.028	213.936	308.804	233.49	240.646
Dthd1	Death domain containing 1	A0A571BG01_MOUSE;E9PZX1_MOUSE		2107.59	1681.94	1817.1	1299.07	1338.08	1165.06	1047.71	1977.36	582.522	611.481	820.176	1986.28	2358.03	1936.32	443.003	766.49
Frmpd4	FERM and PDZ domain containing 4;FERM and PDZ domain containing 4;FERM and PDZ domain-containing protein 4;Isoform 2 of FERM and PDZ domain-containing protein 4;Isoform 3 of FERM and PDZ domain-containing protein 4	A0A571BG68_MOUSE;A0A589MR22_MOUSE;FRPD4_MOUSE;FRPD4_MOUSE;FRPD4_MOUSE		279.064	274.172	283.821	296.207	286.776	320.988	292.9	296.627	200.84	209.475	208.996	207.371	204.563	196.324	204.887	207.712
Abr	Active breakpoint cluster region-related protein	A0A571BG95_MOUSE		165.015	157.312	140.047	142.03	132.564	118.059	97.0348	97.7402	90.9295	83.5465	79.8257	83.866	132.438	145.907	109.339	122.021
Nav1	Neuron navigator 1;Isoform 2 of Neuron navigator 1	A0A589P973_MOUSE;NAV1_MOUSE		37.5234	44.1731	46.2934	35.0884	78.4389	54.7022	67.3965	72.4859	NaN	NaN	NaN	NaN	13.4066	24.67	39.7338	24.1291
Septin4	Septin-4;Septin-4;Isoform 2 of Septin-4	A0A5F8MP96_MOUSE;SEPT4_MOUSE;SEPT4_MOUSE		1232.52	1285.82	1180.76	1228.3	1624.73	1688.74	1443.99	1452.11	1803.64	1912.18	1736.13	1660.77	1317.64	1343.22	1324.38	1311.27
Tns3	Tensin 3;Tensin 3;Tensin-3	A0A5F8MP98_MOUSE;A0A5F8MPF2_MOUSE;TENS3_MOUSE		348.513	315.103	315.332	312.394	256.267	224.519	276.212	267.913	272.749	307.482	276.299	309.545	296.686	315.826	340.898	321.489
Kcnab1	Voltage-gated potassium channel subunit beta-1	A0A5F8MPA4_MOUSE;A0A5F8MPK0_MOUSE;KCAB1_MOUSE;Q3U6C5_MOUSE;Q9D5E9_MOUSE		187.277	198.693	118.61	139.856	184.639	163.391	112.892	139.65	120.741	107.321	108.932	95.6579	152.157	178.12	166.625	199.896
Kcnip2	Kv channel-interacting protein 2;Kv channel-interacting protein 2;Potassium channel interacting protein 2;Kv channel-interacting protein 2;Kv channel-interacting protein 2;Kv channel-interacting protein 2;Kv channel-interacting protein 2;Isoform 2 of Kv channel-interacting protein 2;Isoform 3 of Kv channel-interacting protein 2;Isoform 4 of Kv channel-interacting protein 2	A0A5F8MPB0_MOUSE;E9QNK8_MOUSE;Q3YAA4_MOUSE;Q3YAB1_MOUSE;Q3YAB2_MOUSE;Q3YAB3_MOUSE;KCIP2_MOUSE;KCIP2_MOUSE;KCIP2_MOUSE;KCIP2_MOUSE		NaN	NaN	73.8946	73.834	74.3799	101.917	87.5737	83.7204	83.9538	116.97	77.1508	66.1595	176.614	137.365	159.381	79.6876
Itga6	Integrin alpha 6;Integrin alpha-6;Isoform Alpha-6X1A of Integrin alpha-6;Itga6 protein;Itga6 protein (Fragment);Uncharacterized protein	A0A5F8MPB5_MOUSE;ITA6_MOUSE;ITA6_MOUSE;Q6PEE8_MOUSE;Q80ZI8_MOUSE;Q8CC06_MOUSE		84.822	67.2293	58.2189	55.5676	43.7282	56.5114	48.6565	54.8871	55.7396	49.9972	49.9395	36.9207	55.6513	53.4335	78.6861	73.5762
Rdx	Radixin;Radixin;Radixin (Fragment);Radixin (Fragment)	A0A5F8MPB9_MOUSE;RADI_MOUSE;Q3TH46_MOUSE;Q3U111_MOUSE		288.804	238.885	194.391	224.565	220.413	221.667	191.383	215.6	213.47	214.096	226.61	251.001	198.86	211.879	252.744	244.302
Trak1	Trafficking protein, kinesin binding 1;Trafficking kinesin-binding protein 1	A0A5F8MPD8_MOUSE;TRAK1_MOUSE		457.183	445.162	417.941	407.949	459.753	531.899	458.564	474.353	394.072	382.906	383.099	386.847	340.125	358.697	341.879	344.718
Prdm11	PR domain containing 11	A0A5F8MPE3_MOUSE		59.875	64.2259	66.6025	47.0281	46.9658	63.3713	61.8266	41.0936	57.5197	47.5043	43.1344	48.0502	36.209	53.0957	40.2312	38.4636
Amd1;Amd2;Amd1	adenosylmethionine decarboxylase;S-adenosylmethionine decarboxylase proenzyme 2;S-adenosylmethionine decarboxylase proenzyme 1	A0A5F8MPF5_MOUSE;DCAM2_MOUSE;DCAM1_MOUSE		251.147	259.512	268.484	274.735	349.517	340.301	300.107	277.465	207.803	244.446	287.314	271.334	261.633	249.139	219.608	226.22
Arhgef18	Rho/rac guanine nucleotide exchange factor (GEF) 18;Rho/rac guanine nucleotide exchange factor (GEF) 18;Rho guanine nucleotide exchange factor 18;Isoform 2 of Rho guanine nucleotide exchange factor 18	A0A5F8MPF6_MOUSE;A0A5F8MPH6_MOUSE;ARHGI_MOUSE;ARHGI_MOUSE		595.894	580.652	563.796	531.156	638.371	638.839	590.789	594.5	540.132	554.043	561.724	551.209	552.238	563.39	537.031	526.482
Pde1c	Phosphodiesterase	A0A5F8MPG4_MOUSE		91.8461	84.2314	85.3363	91.6115	42.9868	43.1989	30.8338	33.629	45.4356	41.8438	37.6018	43.3527	92.6536	91.6732	111.858	116.922
Dpp10	Dipeptidylpeptidase 10	A0A5F8MPK1_MOUSE		397.014	384.943	318.1	352.397	317.528	312.568	296.131	315.802	292.561	307.994	273.008	302.175	290.611	270.508	333.083	305.738
Sacm1l	Phosphatidylinositol-3-phosphatase SAC1	A0A5F8MPK9_MOUSE;SAC1_MOUSE		1771.96	1733.77	1390.76	1347.36	1341.46	1274.25	1134.37	1165.31	1675.47	1640.16	1568.65	1620.52	1496.65	1521.45	1657.17	1512.35
Septin3	Neuronal-specific septin-3	A0A5F8MPL6_MOUSE;SEPT3_MOUSE		2092.58	2182.71	2068.98	2100.84	2215.9	2113.46	2059.01	2067.09	2734.39	2795.85	2957.21	2855.49	2267.1	2336.82	1941.64	1922.53
Shc3	Src homology 2 domain-containing transforming protein C3	A0A5F8MPM1_MOUSE		553.972	544.469	552.585	545.974	602.436	578.598	606.375	597.872	551.481	544.81	578.873	556.927	500.012	521.901	522.132	534.47
Mical3	F-actin monooxygenase;F-actin monooxygenase;[F-actin]-monooxygenase MICAL3	A0A5F8MPN4_MOUSE;A0A5F8MPU7_MOUSE;MICA3_MOUSE		856.121	837.458	771.359	794.181	972.889	970.521	766.532	804.818	881.287	878.798	734.827	762.254	753.113	801.059	725.473	729.157
Qtrt2	Queuine tRNA-ribosyltransferase accessory subunit 2	A0A5F8MPN7_MOUSE;QTRT2_MOUSE		349.869	362.479	436.222	428.829	342.75	324.523	378.336	357.591	330.694	328.652	371.041	392.046	400.964	392.626	496.737	470.774
Mdh1	Malate dehydrogenase;Malate dehydrogenase, cytoplasmic	A0A5F8MPN8_MOUSE;MDHC_MOUSE		266.751	262.518	175.474	195.013	259.69	191.472	220.343	210.131	190.025	216.515	242.853	246.68	221.02	189.655	252.008	274.751
Plekhg1	Pleckstrin homology domain containing, family G (with RhoGef domain) member 1;Pleckstrin homology domain containing, family G (with RhoGef domain) member 1 (Fragment);Plekhg1 protein;Plekhg1 protein;Pleckstrin homology domain containing, family G (with RhoGef domain) member 1;DH domain-containing protein;DH domain-containing protein (Fragment)	A0A5F8MPP0_MOUSE;F6S200_MOUSE;Q148U4_MOUSE;Q148U5_MOUSE;Q3UX37_MOUSE;Q3V381_MOUSE;Q3V3S7_MOUSE		NaN	NaN	195.62	164.365	120.071	91.4356	98.7728	135.256	106.311	121.166	85.9908	95.0574	84.4464	83.3013	218.153	256.203
Cracd	Capping protein inhibiting regulator of actin;Capping protein-inhibiting regulator of actin dynamics;Isoform 4 of Capping protein-inhibiting regulator of actin dynamics	A0A5F8MPP1_MOUSE;CRACD_MOUSE;CRACD_MOUSE		140.609	139.099	107.085	135.756	147.458	140.442	129.105	130.539	112.714	126.081	108.949	110.618	135.164	133.484	122.558	128.964
Sh3pxd2b	SH3 and PX domains 2B;SH3 and PX domain-containing protein 2B	A0A5F8MPP7_MOUSE;SPD2B_MOUSE		149.934	148.627	102.31	114.454	108.292	117.412	109.297	106.214	87.1608	96.435	119.652	100.115	86.7364	99.7964	94.1745	103.033
Tmem145	Transmembrane protein 145	A0A5F8MPQ2_MOUSE;D3YU53_MOUSE;E9PUE6_MOUSE		68.9633	52.9035	56.3128	46.1461	61.8972	42.8693	52.5469	72.899	25.7654	35.8199	47.9143	47.4146	21.5651	29.4426	66.6914	54.5109
Fnbp1l	Formin-binding protein 1-like;Formin-binding protein 1-like;Formin-binding protein 1-like;Formin-binding protein 1-like;Isoform 2 of Formin-binding protein 1-like	A0A5F8MPQ8_MOUSE;E9PUI5_MOUSE;E9PUK3_MOUSE;FBP1L_MOUSE;FBP1L_MOUSE		331.087	319.239	315.506	311.733	276.131	254.267	262.58	249.316	153.787	172.284	161.223	149.588	183.758	199.285	208.887	250.808
Ift46	Intraflagellar transport protein 46 homolog	A0A5F8MPR6_MOUSE;IFT46_MOUSE		128.292	154.001	80.0687	77.4288	147.467	141.102	109.041	138.693	94.5157	115.632	97.7676	126.815	102.365	108.773	79.4014	90.3872
Acp2	Lysosomal acid phosphatase	A0A5F8MPS7_MOUSE;PPAL_MOUSE;Q3U4F3_MOUSE		77.2595	55.3705	89.6138	100.41	113.488	101.354	84.7259	99.3393	68.2755	50.6383	57.2828	67.7834	87.9875	88.6865	108.516	120.544
Syt6	Synaptotagmin VI;Syt6 protein;Syt6 protein;Synaptotagmin VI;Synaptotagmin-6;Isoform 2 of Synaptotagmin-6	A0A5F8MPS8_MOUSE;Q05BE2_MOUSE;Q6P1H9_MOUSE;Q8C8S6_MOUSE;SYT6_MOUSE;SYT6_MOUSE		816.588	732.433	855.035	838.559	420.711	425.811	450.771	460.192	390.197	384.098	407.306	426.615	747.267	748.015	718.135	698.035
Tmem87b	Transmembrane protein 87B;Transmembrane protein 87B;Isoform 2 of Transmembrane protein 87B;Isoform 3 of Transmembrane protein 87B;Transmembrane protein 87B (Fragment)	A0A5F8MPT2_MOUSE;TM87B_MOUSE;TM87B_MOUSE;TM87B_MOUSE;Z4YML9_MOUSE		236.279	229.488	226.349	261.542	149.604	181.878	170.372	155.346	97.5157	98.1363	90.0044	88.2008	119.611	121.452	145.481	167.762
Acap2	Arf-GAP with coiled-coil, ANK repeat and PH domain-containing protein (Fragment)	A0A5F8MPT4_MOUSE		269.032	215.585	269.712	288.77	182.131	202.841	257.945	233.553	258.302	275.665	277.768	295.699	272.085	249.311	254.831	228.895
Cgn	Cingulin;Cingulin;Cingulin;Cingulin;Isoform 2 of Cingulin	A0A5F8MPT6_MOUSE;D3YUW7_MOUSE;E9QMC1_MOUSE;CING_MOUSE;CING_MOUSE		55.3965	71.5181	34.1019	41.6006	38.5104	61.1076	37.4931	46.0337	27.5364	33.105	36.3318	30.2802	28.7564	34.6892	35.8462	31.311
Peg3	Paternally expressed 3;Paternally-expressed gene 3 protein	A0A5F8MPW9_MOUSE;PEG3_MOUSE		314.814	318.208	286.968	308.668	312.869	267.337	276.063	287.348	232.44	245.906	225.932	231.127	264.094	306.3	295.732	291.027
Rbms2	RNA binding motif, single stranded interacting protein 2;RNA binding motif, single stranded interacting protein 2;RRM domain-containing protein;RNA-binding motif, single-stranded-interacting protein 2;Scr3	A0A5F8MPX7_MOUSE;E9Q7G6_MOUSE;Q3UGN4_MOUSE;RBMS2_MOUSE;Q9WTS9_MOUSE		85.8268	118.023	NaN	53.8825	69.9101	76.8906	46.2253	75.7055	68.9135	82.0446	82.6482	69.6752	99.5444	66.0884	127.917	107.71
Ptk2	Focal adhesion kinase 1	A0A5F8MPY3_MOUSE;K7Q751_MOUSE		1375.86	1036.36	652.878	869.585	1435.76	915.411	1103.07	970.4	1017.15	1006.35	891.89	1236.78	904.188	842.844	323.335	385.087
Nbea	Neurobeachin (Fragment)	A0A5F8MPY6_MOUSE		NaN	NaN	65.8105	29.81	NaN	NaN	NaN	NaN	44.0806	NaN	35.6849	22.8364	40.4727	NaN	71.3222	80.8539
Ripor2	Rho family-interacting cell polarization regulator 2;Isoform 5 of Rho family-interacting cell polarization regulator 2;Isoform 6 of Rho family-interacting cell polarization regulator 2	A0A5F8MPY8_MOUSE;RIPR2_MOUSE;RIPR2_MOUSE		197.224	180.542	232.76	183.324	110.594	132.75	159.112	151.546	89.9152	97.4492	75.2158	105.417	205.982	171.371	239.666	207.965
Bin2	Bridging integrator 2	A0A5F8MQ05_MOUSE;BIN2_MOUSE;S4R270_MOUSE		196.758	161.356	159.493	150.481	186.458	173.783	191.101	181.185	192.953	195.157	158.345	160.603	212.598	215.424	191.447	167.706
Tmem178b	Transmembrane protein 178B	A0A5F8MQ13_MOUSE;M0QWJ9_MOUSE		137.409	198.578	84.0495	125.749	NaN	107.882	NaN	NaN	60.8877	94.1651	NaN	79.2546	85.8883	150.016	136.92	94.5836
Ppp6r2	Protein phosphatase 6, regulatory subunit 2;Protein phosphatase 6, regulatory subunit 2	A0A5F8MQ25_MOUSE;G3X9K4_MOUSE		3987.42	4171.58	4107.07	4201.56	4377.8	4346.5	4209.04	4321.25	4098.33	4098.2	4138.69	4140.98	3878.94	3898.18	3612.44	3969.2
Mrtfa	Myocardin related transcription factor A;Myocardin related transcription factor A;Myocardin-related transcription factor A	A0A5F8MQ33_MOUSE;D3YUI2_MOUSE;MRTFA_MOUSE		555.856	586.859	562.065	545.703	498.169	512.943	485.514	499.63	192.238	201.783	197.093	203.318	250.503	236.032	280.704	275.707
Lpin1	phosphatidate phosphatase	A0A5F8MQ53_MOUSE		162.726	180.89	111.49	131.103	NaN	86.3188	88.4696	117.669	117.481	110.612	95.6146	70.3495	83.0839	109.18	109.198	98.1177
Spire1	Spire type actin nucleation factor 1	A0A5H1ZRL1_MOUSE		1177.4	1189.12	1356.87	1378.18	1670.94	1591.75	1672.63	1670.55	978.995	989.357	1078.71	1106.01	1180.76	1118.7	1441.99	1323.27
Nelfb	Negative elongation factor B;Isoform 2 of Negative elongation factor B	A0A5H1ZRL3_MOUSE;NELFB_MOUSE		423.169	448.309	378.471	389.005	407.637	438.975	426.661	416.334	439.586	422.807	338.506	350.912	345.62	375.889	401.06	398.885
Cecr2	CECR2, histone acetyl-lysine reader (Fragment);Chromatin remodeling regulator CECR2;Isoform 2 of Chromatin remodeling regulator CECR2	A0A5H1ZRM0_MOUSE;CECR2_MOUSE;CECR2_MOUSE		884.141	781.842	1239.95	1257.32	1140.33	1302.13	1495.81	1443.02	1157.53	1221.18	1591.98	1440.19	1588.58	1568.5	1479.29	1417.31
Scn2a	Sodium channel protein;Sodium channel protein type 2 subunit alpha	A0A5H1ZRM8_MOUSE;SCN2A_MOUSE		714.598	672.651	579.111	604.257	503.806	557.227	516.265	521.028	650.401	640.233	644.286	606.665	772.406	701.007	705.694	702.587
Ttn	Titin	A0A5K1VVQ9_MOUSE;TITIN_MOUSE;E9Q8K5_MOUSE;E9Q8N1_MOUSE		401.778	375.36	311.835	302.274	369.321	440.741	336.813	369.542	326.498	394.079	363.183	365.523	414.26	385.718	326.354	413.954
Unc45a	Unc-45 myosin chaperone A;Protein unc-45 homolog A	A0A5K1VVS7_MOUSE;UN45A_MOUSE		628.069	598.928	573.854	559.788	593.818	621.442	595.572	588.619	506.094	574.95	605.904	604.443	648.683	653.529	712.385	699.386
Fam107a	Actin-associated protein FAM107A	A0A5S8E879_MOUSE;F107A_MOUSE		143.614	162.751	141.563	120.072	169.387	194.42	126.729	133.723	133.571	132.975	141.661	163.685	101.204	115.929	114.351	122.071
Nlgn3;Nlgn3;Nlgn3;Nlgn3;Nlgn3;mKIAA1480;Nlgn3	Neuroligin 3;Neuroligin 3;Neuroligin 3;Neuroligin 3;Neuroligin 3;MKIAA1480 protein (Fragment);Neuroligin-3	A0A5S9EER5_MOUSE;A0A5S9EES2_MOUSE;A0A5S9EF37_MUSMC;A2AGI2_MOUSE;B2RWZ9_MOUSE;Q69ZI4_MOUSE;NLGN3_MOUSE		598.71	563.569	540.411	568.326	488.028	527.092	486.598	485.207	518.56	507.664	503.427	516.774	540.057	555.976	689.069	646.699
Gja1	Gap junction protein;Gap junction alpha-1 protein;Gap junction protein	A0A654ICD2_MOUSE;CXA1_MOUSE;Q7TMQ1_MOUSE		87.9748	78.7602	52.5162	53.0396	11.8012	122.945	92.7933	80.7041	73.101	69.8196	48.5155	71.2168	145.121	83.0513	96.5078	100.738
Idh3b	Isocitrate dehydrogenase [NAD] subunit, mitochondrial	A0A668KL51_MOUSE		6488.51	6485.48	5910.82	5877.69	3986.46	3878.23	3926.45	3881.58	7472.07	7513.47	6975.56	7093.95	4657.61	4673.94	5154.62	4933.59
Tmem94	Transmembrane protein 94;Transmembrane protein 94 (Fragment);Transmembrane protein 94	A0A668KL57_MOUSE;Q3U2K2_MOUSE;TMM94_MOUSE		29.7479	NaN	10.9491	18.4196	18.1096	NaN	15.6724	NaN	NaN	13.4317	22.6531	13.6852	11.6827	13.4283	21.9368	15.8732
Sorbs1	Sorbin and SH3 domain containing 1 (Fragment)	A0A668KL65_MOUSE		99.1662	109.655	67.56	107.857	107.064	142.386	115.894	109.667	73.4075	80.0112	63.7123	53.2496	62.0393	56.1438	55.9015	58.2531
Map2	Microtubule-associated protein	A0A668KLC6_MOUSE		32304.2	32815.1	25914.6	26060.3	34622.6	35138.4	31099	31408.9	32029.3	31730	25401.1	25503.2	32707.1	32632.8	26573.8	26171.5
Akap12	A kinase (PRKA) anchor protein (gravin) 12;A kinase (PRKA) anchor protein (gravin) 12;A kinase (PRKA) anchor protein (Gravin) 12;A-kinase anchor protein 12	A0A668KLD3_MOUSE;A0A668KLV9_MOUSE;B2RRE0_MOUSE;AKA12_MOUSE		586.152	583.043	469.933	486.602	555.413	544.3	518.237	513.898	690.614	683.971	607.172	577.875	698.115	692.086	666.144	723.461
Esrra;Esrrb;Esrra;Esrrb;Esrra;Esrrb;Esrrb;Esrrb	Estrogen related receptor, alpha;Estrogen related receptor, beta;Estrogen related receptor, alpha;Estrogen related receptor, beta;Steroid hormone receptor ERR1;Steroid hormone receptor ERR2;Esrrb protein (Fragment);Steroid hormone receptor ERR2	A0A668KLU7_MOUSE;E9QKA2_MOUSE;G3UY24_MOUSE;G5E8P8_MOUSE;ERR1_MOUSE;ERR2_MOUSE;Q80VS1_MOUSE;Q8CCV5_MOUSE		73.6915	34.0211	47.8226	45.7765	19.3402	30.9948	36.0086	36.5352	71.3983	57.644	NaN	24.6298	27.1251	NaN	26.2807	27.212
Amph	Amphiphysin	A0A668KM31_MOUSE		24.206	13.6392	NaN	22.2796	22.5685	NaN	33.7423	18.2739	16.5714	24.3811	42.1467	27.0123	20.7269	23.1968	25.8794	23.2351
Nav3	Neuron navigator 3	A0A668KM70_MOUSE;E9QMF5_MOUSE;NAV3_MOUSE		166.759	169.217	156.613	158.284	168.038	153.599	163.796	151.884	94.4929	97.2366	103.263	95.8945	96.3808	101.38	77.2884	95.0537
Gsdmd	Gasdermin domain containing 1, isoform CRA_c;Gasdermin-D	A0A679AXP3_MOUSE;GSDMD_MOUSE		50.1733	43.1349	33.6877	28.2614	31.5961	NaN	31.3184	41.7765	32.2701	20.0348	59.0097	20.5805	33.443	39.488	35.5583	30.1266
Nlgn4l;Nlgn4l;Nlgn4;Nlgn4;Nlgn4l	Neural cell adhesion protein neuroligin 4;Neural cell adhesion protein neuroligin 4;Neuroligin-4;Neuroligin-4;Neuroligin 4-like	A0A6B7E3H9_MUSMC;A0A6B7E676_MOUSE;A0A6C1EIU1_MOUSE;A0A6C1EJ07_MOUSE;NLGN4_MOUSE		150.771	167.396	162.528	160.309	175.362	151.272	159.801	172.148	132.411	144.515	183.328	170.081	164.795	149.205	139.603	151.837
Nr4a3	Nuclear receptor subfamily 4 group A member 3;Nr4a3 protein (Fragment);Nr4a3 protein (Fragment);Nuclear receptor subfamily 4, group A, member 3 (Fragment);Nuclear receptor subfamily 4 group A member 3;Isoform 2 of Nuclear receptor subfamily 4 group A member 3	A0A6F8X1J9_MOUSE;A2VCP5_MOUSE;A2VCP6_MOUSE;F6R7A2_MOUSE;NR4A3_MOUSE;NR4A3_MOUSE		NaN	NaN	4.53127	NaN	NaN	NaN	4.14232	NaN	NaN	1.39673	NaN	NaN	NaN	2.3809	1.12855	6.08341
Xaf1	Xaf1;XIAP-associated factor 1;Isoform 2 of XIAP-associated factor 1	A0A6G7MAJ9_MOUSE;XAF1_MOUSE;XAF1_MOUSE		75.139	70.5287	67.3678	37.2385	74.8368	NaN	50.1874	69.6607	101.504	76.3778	58.6038	NaN	34.236	94.5558	77.6544	47.6233
Vkorc1	vitamin-K-epoxide reductase (warfarin-sensitive);vitamin-K-epoxide reductase (warfarin-sensitive);vitamin-K-epoxide reductase (warfarin-sensitive);vitamin-K-epoxide reductase (warfarin-sensitive);vitamin-K-epoxide reductase (warfarin-sensitive);vitamin-K-epoxide reductase (warfarin-sensitive) (Fragment);vitamin-K-epoxide reductase (warfarin-sensitive) (Fragment);vitamin-K-epoxide reductase (warfa…	A0A6G7NP03_MOUSE;A0A6G7NPC0_MOUSE;A0A7T0LYB5_MUSMC;A0A7T0LYD5_MUSMC;A0A7T0LYE7_MOUSE;A0A7T0LYF1_MOUSE;A0A7T0LYF2_MOUSE;A0A7T0LYF5_MOUSE;A0A7T0LYF6_MOUSE;A0A7T0LYF7_MOUSE;A0A7T0LYG0_MOUSE;A0A7T0LYI9_MUSMC;A0A7T0LYK6_MOUSE;A0A7T0LYK8_MOUSE;A0A7T0LYL8_MOUSE;A0A7T0LZ12_MUSMC;A0A7T0LZ52_MOUSE;A0A7T0LZ78_MOUSE;A0A7T0LZJ2_MOUSE;A0A7T0LZK8_MOUSE;A0A7T0Q274_MOUSE;A0A7T0Q280_MOUSE;A0A7T0Q290_MOUSE;A0A7T0Q2…		535.668	526.185	418.849	427.069	204.283	231.037	276.794	257.418	415.604	418.354	506.814	545.208	409.301	412.311	493.005	522.068
Gas7	Growth arrest specific 7	A0A6I8MWW1_MOUSE		182.635	149.159	166.759	151.712	252.65	148.572	149.823	200.64	220.085	228.587	262.614	240.585	155.538	201.169	221.002	248.266
Zdbf2	Zinc finger, DBF-type containing 2;DBF4-type zinc finger-containing protein 2 homolog	A0A6I8MWW6_MOUSE;ZDBF2_MOUSE		241.28	280.295	228.603	226.547	233.565	234.723	218.059	192.215	177.084	187.338	179.177	204.586	235.35	256.886	212.641	223.123
Golga2	Golgi autoantigen, golgin subfamily a, 2;Golgi autoantigen, golgin subfamily a, 2;Golgi autoantigen, golgin subfamily a, 2;MKIAA4150 protein (Fragment);Golgin subfamily A member 2;Isoform 2 of Golgin subfamily A member 2;Golgi autoantigen, golgin subfamily a, 2	A0A6I8MWY5_MOUSE;A0A6I8MX07_MOUSE;E9PUQ5_MOUSE;Q5DTL1_MOUSE;GOGA2_MOUSE;GOGA2_MOUSE;Z4YJU8_MOUSE		159.801	174.485	168.213	141.842	175.037	195.51	191.322	179.217	338.487	337.286	370.18	358.03	308.465	300.666	282.743	278.147
Evi5l	Ecotropic viral integration site 5 like	A0A6I8MWZ4_MOUSE;H3BJX1_MOUSE		NaN	NaN	12.3261	17.2811	12.4049	21.3375	13.5253	16.8284	22.7296	15.8765	13.296	26.8245	15.4138	NaN	24.2449	21.5501
Trim9	RING-type E3 ubiquitin transferase	A0A6I8MWZ7_MOUSE		305.069	333.829	281.621	264.049	376.553	305.755	201.634	185.086	214.56	238.923	165.515	204.986	249.597	239.827	221.175	153.773
Mtx1	Metaxin-1;Metaxin-1;Metaxin	A0A6I8MWZ8_MOUSE;MTX1_MOUSE;Q8R5C0_MOUSE		114.925	134.064	106.894	112.767	92.067	87.3794	73.5477	77.5265	76.0023	75.9598	89.9614	59.0038	65.3548	90.351	90.4969	68.5274
Tbc1d25	Ornithine aminotransferase-like 1, isoform CRA_a	A0A6I8MX15_MOUSE		333.177	357.258	319.252	321.021	355.296	314.688	317.694	292.739	266.619	281.805	267.257	258.44	277.911	282.267	289.611	276.733
Ago1	Argonaute RISC catalytic subunit 1	A0A6I8MX18_MOUSE		878.037	863.536	743.099	716.07	818.477	795.567	736.603	698.612	582.546	567.842	541.446	557.48	635.043	673.252	631.913	648.608
Ldhb	L-lactate dehydrogenase;L-lactate dehydrogenase B chain	A0A6I8MX27_MOUSE;LDHB_MOUSE		2417.07	2355.58	2388.99	2503.62	3021.46	2955.92	2559.21	2470.75	2697.8	2666.71	2601.16	2510.25	2819.61	2828.75	2256.56	2317.2
Tpgs1	Tubulin polyglutamylase complex subunit 1;Gene trap ROSA b-geo 22;Tubulin polyglutamylase complex subunit 1	A0A6Q6PKE1_MOUSE;B2RRP1_MOUSE;TPGS1_MOUSE		69.0353	73.3868	60.3606	60.2812	43.3289	72.2169	47.917	55.2891	36.7627	55.1659	53.5703	48.9166	61.9795	68.3249	74.7337	70.4281
Clcn3	Chloride channel protein;H(+)/Cl(-) exchange transporter 3	A0A6Q6Q7B9_MOUSE;CLCN3_MOUSE		334.537	335.811	336.557	339.93	299.032	334.388	308.458	291.38	259.86	250.1	289.316	280.796	260.679	264.391	255.765	268.449
Pif1	ATP-dependent DNA helicase PIF1;ATP-dependent DNA helicase PIF1;Isoform 3 of ATP-dependent DNA helicase PIF1	A0A6Q6QXN1_MOUSE;PIF1_MOUSE;PIF1_MOUSE		92.4936	120.97	94.8634	68.681	97.3416	44.9141	NaN	56.3126	45.7812	48.5023	NaN	108.782	119.066	84.0882	142.901	125.681
Snx14	Sorting nexin 14;Sorting nexin 14;Sorting nexin 14;Sorting nexin-14	A0A6Q6RCM4_MOUSE;G3UX33_MOUSE;G3UXB6_MOUSE;SNX14_MOUSE		139.083	143.907	106.998	113.345	101.093	112.312	105.441	98.8645	125.351	139.084	138.834	127.113	116.048	127.9	135.176	136.715
pol	Pol;Pol protein	A0A7G9TMG6_MOUSE;Q7TQ37_MOUSE		133.364	136.729	121.851	121.955	107.072	110.905	109.46	101.432	92.4119	107.264	73.9831	87.8046	110.403	99.1876	84.781	84.9046
Ahnak2	AHNAK nucleoprotein 2	A0A7N9VR94_MOUSE		141.547	135.989	81.5863	104.039	176.05	123.162	113.038	97.8198	144.033	154.829	96.4492	105.608	172.906	241.831	247.347	287.605
Afg2b	ATPase family gene 2 protein homolog B	AFG2B_MOUSE		19.7272	30.5564	31.336	28.2886	30.5566	30.5034	26.1748	23.777	22.3624	NaN	22.6238	20.6776	NaN	42.1596	28.7409	NaN
Fgf12	Fibroblast growth factor;Fibroblast growth factor 12	A0A7U3JW65_MOUSE;FGF12_MOUSE		167.548	133.028	145.201	165.014	142.077	188.653	169.077	149.799	149.462	180.741	194.289	173.724	164.636	165.197	88.0609	99.9802
Cldnd1	Claudin domain containing 1, isoform CRA_b;Claudin domain containing 1 (Fragment);Claudin domain containing 1;Claudin domain-containing protein 1	A0A811BIT5_MOUSE;E0CY63_MOUSE;E0CY66_MOUSE;CLDN1_MOUSE		144.538	113.336	NaN	133.82	NaN	141.61	93.1729	88.7275	NaN	114.224	92.2578	84.2385	67.9898	95.9615	103.978	NaN
Mrtfb	Megakaryoblastic leukemia 2 isoform named SOLOIST	A0A8D4USI8_MOUSE		167.869	250.204	166.477	164.412	79.9085	68.1671	56.2854	83.9621	23.1805	42.617	29.3209	62.239	86.8723	80.7739	97.8388	108.406
Grip1	Glutamate receptor interacting protein 1	A0A8I4SX76_MOUSE		664.33	667.901	614.577	635.9	600.655	635.074	534.551	588.837	339.246	349.562	377.204	394.376	386.187	388.014	298.575	325.822
Cibar1	CBY1 interacting BAR domain containing 1;CBY1-interacting BAR domain-containing protein 1	A0A8Q0KEJ4_MOUSE;CBAR1_MOUSE		93.7232	93.0148	70.9851	79.3359	43.6732	78.0724	68.1886	74.4044	52.8156	57.4531	66.829	81.8013	81.6141	64.9426	76.4259	76.1242
Hypk	Huntingtin interacting protein K;Huntingtin-interacting protein K	A0A8Q0PQH5_MOUSE;HYPK_MOUSE		120.82	119.504	106.021	88.5267	114.023	90.1577	88.989	95.8565	86.8411	59.6332	105.947	100.805	80.348	114.499	140.376	147.13
Ksr2	Kinase suppressor of ras 2;Kinase suppressor of ras 2;Kinase suppressor of Ras 2	A0A8V5L0Q6_MOUSE;A5X3G4_MOUSE;KSR2_MOUSE		717.148	680.512	669.522	639.123	656.376	697.166	650.173	596.165	503.665	509.411	481.976	475.929	548.833	478.249	530.381	511.236
Cyth2	Cytohesin-2;Cytohesin-2;Isoform 2 of Cytohesin-2;Cytohesin-2;Cytohesin-2	A0A8Z1RZY0_MOUSE;CYH2_MOUSE;CYH2_MOUSE;Q5HZZ0_MOUSE;Q99KH2_MOUSE		931.489	739.294	956.972	1072.17	1026.89	942.111	980.91	933.501	635.029	588.384	818.989	538.702	575.017	610.676	NaN	NaN
Renbp	N-acylglucosamine 2-epimerase	A0A8Z1SL50_MOUSE		414.844	431.977	571.182	556.1	703.488	758.275	638.83	609.053	552.377	494.412	677.131	631.398	790.621	788.076	677.287	736.163
Ptprg	protein-tyrosine-phosphatase;Receptor-type tyrosine-protein phosphatase gamma	A0A991ELE1_MOUSE;PTPRG_MOUSE		45.2702	NaN	24.8911	35.8355	38.8357	69.7116	48.8991	49.1455	37.7579	36.2239	NaN	43.8011	47.1548	54.7611	51.64	51.6718
Sfpq	Splicing factor proline/glutamine rich (polypyrimidine tract binding protein associated);Splicing factor, proline- and glutamine-rich	A0A991ENV6_MOUSE;SFPQ_MOUSE		304.121	332.005	220.981	241.02	302.608	318.331	239.777	233.936	251.743	244.627	188.675	215.769	298.728	320.007	303.138	297.983
H1f10	H1.10 linker histone;H1 histone family, member X	A0A991ENW0_MOUSE;Q80ZM5_MOUSE		179.892	173.193	84.6676	100.459	107.45	143.162	83.5362	76.9972	NaN	77.3916	68.0226	84.1643	116.095	102.925	115.826	240.16
Slc6a1	Transporter;Sodium- and chloride-dependent GABA transporter 1;Transporter	A0A991EPK0_MOUSE;SC6A1_MOUSE;Q6PCX2_MOUSE		569.443	638.355	759.25	809.784	645.661	665.911	659.199	629.683	661.318	651.73	729.896	654.087	655.449	690.241	710.84	652.416
Cyth2	Cytohesin-2	A0A991EQU8_MOUSE		2544.6	2546.15	2458.91	2608.47	3083.1	2994.58	2869.74	2767.3	1846.36	2022.15	2124.48	2096.24	1934.41	1983.56	1415.07	1467.24
Rptor	Regulatory associated protein of MTOR, complex 1;Regulatory associated protein of MTOR, complex 1;4932417H02Rik protein (Fragment)	A0A991EQV1_MOUSE;A2ACM0_MOUSE;A4FUW1_MOUSE		2183.94	2203.83	1922.25	1911.24	2099.47	2128.09	2081.84	2040.83	1990.99	1935.76	1912.62	1945.77	1907.71	1935.17	1903.48	1929.27
Nploc4	NPL4 homolog, ubiquitin recognition factor	A0A991EQV5_MOUSE		223.489	282.042	255.582	220.897	225.742	254.868	260.633	291.232	258.267	254.085	282.191	250.791	253.387	285.596	190.536	244.107
Gm10509;Gm10509;Gm10509;Zfp983	Predicted gene 10509;Predicted gene 10509;Predicted gene 10509;Zinc finger protein 983	A0A9L6KDU7_MOUSE;A0A9L6KDY0_MOUSE;A0A9L6KEE6_MOUSE;E9PUT0_MOUSE		18.5335	NaN	16.3471	25.5436	33.1881	15.8414	29.795	36.2951	22.0324	15.9149	31.8507	31.8597	22.6636	11.9704	11.9805	30.179
Kat7	K(lysine) acetyltransferase 7;histone acetyltransferase;histone acetyltransferase;histone acetyltransferase (Fragment);Histone acetyltransferase KAT7;Isoform 2 of Histone acetyltransferase KAT7;Isoform 3 of Histone acetyltransferase KAT7;Isoform 4 of Histone acetyltransferase KAT7	A0AA74KSS6_MOUSE;Q1AJD0_MOUSE;Q3TD41_MOUSE;Q3UGF2_MOUSE;KAT7_MOUSE;KAT7_MOUSE;KAT7_MOUSE;KAT7_MOUSE		NaN	348.315	74.5411	86.5293	71.8006	84.6534	NaN	68.0011	106.304	101.582	66.5398	72.4036	84.4477	83.8739	NaN	NaN
Ppp4r2	Protein phosphatase 4, regulatory subunit 2	A0AA74KSS9_MOUSE		778.023	773.518	796.625	793.896	814.269	766.927	834.081	829.758	785.48	835.709	842.844	784.5	809.322	814.115	983.983	967.305
Hdgf	Heparin binding growth factor;Hepatoma-derived growth factor	A0AA74KSY4_MOUSE;HDGF_MOUSE		195.967	180.378	142.071	171.343	240.76	262.948	202.19	205.132	219.759	202.277	224.129	306.377	204.941	194.746	178.997	166.954
Chtop	Chromatin target of PRMT1;2500003M10Rik protein;Chromatin target of PRMT1;2500003M10Rik protein (Fragment);Chromatin target of PRMT1 protein;Isoform 2 of Chromatin target of PRMT1 protein;Isoform 3 of Chromatin target of PRMT1 protein;Isoform 4 of Chromatin target of PRMT1 protein;Isoform 5 of Chromatin target of PRMT1 protein	A0AA74KT39_MOUSE;B7ZMS6_MOUSE;E9PW20_MOUSE;Q2VPR3_MOUSE;CHTOP_MOUSE;CHTOP_MOUSE;CHTOP_MOUSE;CHTOP_MOUSE;CHTOP_MOUSE		87.3897	76.0436	59.7371	64.2773	81.1978	68.9633	60.5428	85.2935	69.955	61.665	51.5463	47.2298	65.434	65.2111	76.7856	79.1987
Brd7	Bromodomain containing 7;Bromodomain-containing protein 7	A0AA74KT86_MOUSE;BRD7_MOUSE		213.453	269.348	373.058	329.878	NaN	121.399	275.177	289.35	302.521	347.546	223.377	280.83	NaN	163.18	668.219	560.629
Ado	2-aminoethanethiol (cysteamine) dioxygenase;2-aminoethanethiol dioxygenase	A0AA74KTB8_MOUSE;AEDO_MOUSE		370.583	317.061	372.616	333.581	362.338	359.517	377.013	360.649	349.092	345.758	377.755	351.422	364.671	396.771	400.388	377.173
Tarbp2	TARBP2, RISC loading complex RNA binding subunit;TARBP2, RISC loading complex RNA binding subunit (Fragment);RISC-loading complex subunit TARBP2	A0AA74KTE6_MOUSE;D3YZS5_MOUSE;TRBP2_MOUSE		145.213	120.033	86.1341	72.8882	87.5968	92.8439	86.4302	76.4657	72.665	73.4339	96.4231	69.046	73.2857	85.9205	58.3726	51.5721
Fhip2a	FHF complex subunit HOOK interacting protein 2A	A0AA74KTG1_MOUSE		1609.42	1615.74	1705.23	1699.7	1819.86	1866.18	1898.25	1877.64	1693.36	1697.31	1882.65	1841.62	1586.94	1628.59	1742.12	1731.02
Pogz	Pogo transposable element with ZNF domain	A0AA74KUQ1_MOUSE;B9EIG6_MOUSE;D3YUW8_MOUSE;D3YUX1_MOUSE;POGZ_MOUSE		133.908	147.159	114.458	100.619	125.891	124.747	109.636	132.644	98.1822	97.1277	109.557	110.98	110.625	106.507	111.071	127.568
Kctd9	Potassium channel tetramerisation domain containing 9	A0AA74KUV6_MOUSE;E9PUA6_MOUSE		42.6211	62.3137	81.4969	79.7124	69.8191	55.8746	59.5667	52.0393	51.8739	53.5886	60.5441	57.9581	60.0512	58.8685	59.1162	73.2726
Edc3	Enhancer of mRNA-decapping protein 3	A0ELI5_MOUSE;EDC3_MOUSE		176.046	189.6	169.761	172.421	161.603	186.683	166.188	170.7	129.573	135.823	126.793	130.41	136.398	147.365	144.781	141.026
Pcid2	PCI domain-containing protein 2 (Fragment);PCI domain-containing protein 2	A0JLQ7_MOUSE;PCID2_MOUSE		448.736	411.252	365.559	410.547	382.043	397.512	395.048	354.974	405.664	404.571	415.821	405.136	404.355	393.07	423.141	409.802
Hist1h2bj;H2bc14;H2bc12;H2bc7;H2bc14;H2bc3;H2bc9;Hist2h2bb;H2bc4;H2bc23;H2bc12;Hist1h2bp;Hist1h2bp;LOC665622	Histone H2B (Fragment);Histone H2B;Histone H2B;Histone H2B type 1-F/J/L;Histone H2B type 1-M;Histone H2B type 1-B;Histone H2B type 1-H;Histone H2B type 2-B;Histone H2B type 1-C/E/G;Histone H2B;Histone H2B type 1-K;Histone H2B type 1-P;Isoform 2 of Histone H2B type 1-P;Histone H2B	A0JLV3_MOUSE;B2RTK3_MOUSE;B2RVD5_MOUSE;H2B1F_MOUSE;H2B1M_MOUSE;H2B1B_MOUSE;H2B1H_MOUSE;H2B2B_MOUSE;H2B1C_MOUSE;Q8CBB6_MOUSE;H2B1K_MOUSE;H2B1P_MOUSE;H2B1P_MOUSE;Q921L4_MOUSE		446.044	533.051	234.706	235.313	278.965	250.382	237.262	217.308	376.382	455.102	387.766	392.849	341.638	371.425	230.605	222.103
Micu3	Efha2 protein (Fragment);Efha2 protein (Fragment);Calcium uptake protein 3, mitochondrial	A0JLX6_MOUSE;B7ZND1_MOUSE;MICU3_MOUSE		NaN	NaN	NaN	36.5409	NaN	NaN	35.5052	30.9575	NaN	NaN	33.0652	26.4233	NaN	33.0079	26.1859	NaN
Aspg	60 kDa lysophospholipase	LPP60_MOUSE		167.345	125.372	124.096	117.271	132.382	112.978	120.269	106.271	143.09	143.159	159.644	159.088	206.169	231.394	267.372	235.528
Gphn	Gephyrin	A0JNY3_MOUSE		472.212	426.072	427.093	481.23	360.442	433.825	418.521	481.865	418.42	422.23	418.212	432.552	363.332	454.248	628.897	620.18
Eif4g2	Eukaryotic translation initiation factor 4 gamma 2	A0JNY7_MOUSE		1068.92	1034.93	665.84	660.306	1004.46	1005.36	856.039	834.459	1106.63	1052.98	724.066	756.633	983.839	1038.3	1005.87	877.783
Dgkh	Diacylglycerol kinase	A0JP53_MOUSE		406.865	300.686	348.9	245.087	319.774	340.173	295.317	279.422	185.903	219.598	196.821	200.777	285.236	254.714	319.034	234.705
Skic8	Superkiller complex protein 8	A0MNP4_MOUSE;SKI8_MOUSE		1198.8	1147.44	1151.71	1189.51	1236.39	1227.59	1291.08	1171.41	1117.68	1133.58	1093.61	1110.8	1191.57	1186.02	1303.1	1181.74
Sarm1	NAD(+) hydrolase SARM1 (Fragment);NAD(+) hydrolase SARM1	A0PJL3_MOUSE;SARM1_MOUSE		3481.13	3683.97	3511.48	3678.72	4026.13	4106.29	3933.14	3974.85	3630.4	3719.04	4063.47	3960.5	3753.34	3671.83	3724.68	3638.12
Bmyc;Mycb	Brain expressed myelocytomatosis oncogene;Protein B-Myc	A0PJL6_MOUSE;MYCB_MOUSE		78.1022	82.9664	85.7209	84.6459	48.992	53.1148	73.9094	59.5434	82.5482	98.7803	79.072	73.3505	76.1923	78.0812	113.889	116.908
2310061I04Rik	2310061I04Rik protein (Fragment);RIKEN cDNA 2310061I04 gene;RIKEN cDNA 2310061I04 gene;Uncharacterized protein (Fragment);Uncharacterized protein (Fragment);2310061I04Rik protein	A0PJN6_MOUSE;B8JJ66_MOUSE;B8JJ69_MOUSE;Q3TA61_MOUSE;Q3UM69_MOUSE;Q497V8_MOUSE		117.17	106.291	82.2652	84.855	67.1612	71.7822	66.3643	63.4899	95.9505	101.555	69.5701	86.6036	83.345	88.3822	59.9008	69.3775
Lzts1	Leucine zipper, putative tumor suppressor 1;Lzts1 protein (Fragment);Leucine zipper putative tumor suppressor 1	A0PJT4_MOUSE;A1L146_MOUSE;LZTS1_MOUSE		243.364	266.377	229.948	209.955	193.943	194.337	194.127	190.699	124.195	130.624	136.853	132.231	154.246	154.031	197.64	208.664
Pcdhb12;Pcdhb10;Pcdhb8;Pcdhb8;Pcdhb5;Pcdhb2;Pcdhb9;Pcdhb16;Pcdhb10;Pcdhb4;Pcdhb19;Pcdhb18;Pcdhb21;Pcdhb22;LOC633332;Pcdhb15;Pcdhb14;Pcdhb17;Pcdhb7;Pcdhb7;Pcdhb11;Pcdhb22;Pcdhb16;Pcdhb16;Pcdhb4;Pcdhb7;Pcdhb9;Pcdhb7;Pcdhb4;Pcdhb5;Pcdhb14;Pcdhb11;Pcdhb21;Pcdhb17;Pcdhb10;Pcdhb9;Pcdhb8;Pcdhb7;Pcdhb5;Pcdhb4;Pcdhb3;Pcdhb22;Pcdhb20;Pcdhb2;Pcdhb19;Pcdhb18;Pcdhb16;Pcdhb15;Pcdhb12;Pcdhb4a;Pcdhb22;Pcdhb20;Pc…	Protocadherin beta 12;Pcdhb10 protein (Fragment);Pcdhb8 protein (Fragment);Pcdhb8 protein (Fragment);Pcdhb5 protein;Protocadherin beta 2;Protocadherin beta 9;Protocadherin beta 16;Pcdhb10 protein (Fragment);Cadherin domain-containing protein;Cadherin domain-containing protein;Cadherin domain-containing protein;Cadherin domain-containing protein;Pcdhb22 protein;LOC633332 protein;Protocadherin beta…	A0PJT6_MOUSE;A4QMV0_MOUSE;A8E4K6_MOUSE;A8E4K7_MOUSE;B2RUH4_MOUSE;B2RUH7_MOUSE;E9Q5G2_MOUSE;Q14BM8_MOUSE;Q14DQ9_MOUSE;Q3TUJ6_MOUSE;Q3UH89_MOUSE;Q3USI6_MOUSE;Q3UYA2_MOUSE;Q52KQ3_MOUSE;Q6NZD8_MOUSE;Q6NZD9_MOUSE;PCDBE_MOUSE;Q80TB2_MOUSE;Q8BQT7_MOUSE;Q8BRL8_MOUSE;Q8C5K2_MOUSE;Q8C8Z3_MOUSE;Q8CB45_MOUSE;Q8CBD2_MOUSE;Q8CBE8_MOUSE;Q8CC02_MOUSE;Q8CCK1_MOUSE;Q8CDY9_MOUSE;Q8CE07_MOUSE;Q8CEA8_MOUSE;Q8K1H2_MOU…		NaN	NaN	24.9709	NaN	34.3534	40.3826	26.2057	NaN	NaN	NaN	33.3997	NaN	NaN	37.4572	26.7117	25.5726
Oscp1	Organic solute carrier partner 1;Organic solute carrier 1 (Fragment);Protein OSCP1	A0ZV96_MOUSE;A2A8Y5_MOUSE;OSCP1_MOUSE		158.866	144.224	144.741	164.556	142.187	156.956	151.729	159.648	179.948	174.069	179.272	176.911	179.709	171.206	154.181	164.861
Ganab	Alpha glucosidase 2 alpha neutral subunit;Isoform 2 of Neutral alpha-glucosidase AB	A1A4T2_MOUSE;GANAB_MOUSE		4687.7	4808.84	4917.58	4847.75	3569.33	3703.2	3759.05	3763.49	3907.39	3883.92	4052.24	4004.18	3876.92	3912.42	4721.34	4696.56
Pik3r5	Phosphoinositide 3-kinase regulatory subunit 5	A1A4T4_MOUSE;PI3R5_MOUSE		NaN	NaN	NaN	NaN	NaN	NaN	NaN	NaN	NaN	NaN	106.594	NaN	NaN	NaN	53.4186	74.337
Actn1	Alpha-actinin-1	A1BN54_MOUSE		522.814	579.728	803.782	851.632	609.511	618.263	655.301	535.776	390.87	429.257	566.326	561.577	838.573	797.286	1076.26	1115.18
St8sia1	Alpha-2,8-sialyltransferase (Fragment);Alpha-N-acetylneuraminide alpha-2,8-sialyltransferase;Alpha-N-acetylneuraminide alpha-2,8-sialyltransferase;Alpha-N-acetylneuraminide alpha-2,8-sialyltransferase;Alpha-N-acetylneuraminide alpha-2,8-sialyltransferase;Alpha-N-acetylneuraminide alpha-2,8-sialyltransferase	A1E2I1_MOUSE;Q3V3B1_MOUSE;Q64468_MOUSE;SIA8A_MOUSE;Q8BL76_MOUSE;Q8BWI0_MOUSE		NaN	NaN	43.4292	37.8482	NaN	NaN	54.0507	45.9924	34.5383	57.6584	52.974	46.5714	50.1644	46.8079	33.8338	NaN
;Dynlt1	Tctex-1;Dynein light chain Tctex-type 1	A1E5T5_MOUSE;DYLT1_MOUSE		258.56	246.088	208.997	226.189	301.763	289.788	269.037	278.257	278.412	252.923	172.688	217.614	340.31	363.453	456.325	401.108
Dsg4	Desmoglein4;Desmoglein-4	A1IGX7_MOUSE;DSG4_MOUSE		NaN	NaN	130.708	NaN	NaN	183.367	NaN	NaN	129.385	133.801	136.608	131.238	104.524	194.16	2976.39	NaN
Vps13c	Chorein;Intermembrane lipid transfer protein VPS13C	A1ILG8_MOUSE;VP13C_MOUSE		1219.47	1213.99	1126.17	1123.21	1154.73	1164.8	1045.07	1045.2	1353.97	1384.12	1362.38	1361.2	1401.32	1400.26	1275.8	1236.64
Rnd2	Rnd2 protein (Fragment);Rho family GTPase 2;Rnd2 protein (Fragment);Rho-related GTP-binding protein RhoN	A1L0U2_MOUSE;A2A4Q3_MOUSE;A2VCR8_MOUSE;RND2_MOUSE		128.524	193.182	108.409	107.672	133.198	118.511	80.2585	94.6081	72.8232	67.4029	79.5494	83.8719	91.6223	81.2971	89.8437	80.6028
Nckap1	Nck-associated protein 1 (Fragment);Nck-associated protein 1	A1L0U6_MOUSE;A2AS98_MOUSE		15190.6	15456.6	14879	14907	14749.4	14928.9	14835.3	14896.1	13574.4	13236.1	14657.5	14694.5	15043.2	14441.8	14654.8	14342
Rigi	RNA helicase (Fragment);RNA helicase (Fragment);Antiviral innate immune response receptor RIG-I	A1L0V6_MOUSE;A7YY79_MOUSE;RIGI_MOUSE		289.633	261.746	247.136	263.886	272.518	286.462	251.631	268.39	268.453	272.941	251.219	267.495	316.247	322.143	311.477	301.133
Rtf2	Replication termination factor 2 (Fragment);Replication termination factor 2 (Fragment);Replication termination factor 2;Replication termination factor 2;Replication termination factor 2;Replication termination factor 2	A1L0V7_MOUSE;A4QMY9_MOUSE;Q3TDK9_MOUSE;Q3TEK4_MOUSE;Q4V9T7_MOUSE;RTF2_MOUSE		NaN	NaN	46.8524	55.1509	75.3653	48.5076	73.1131	89.0133	NaN	77.9506	83.2566	77.3461	63.7503	NaN	NaN	78.3655
Krt78	Krt78 protein (Fragment);Keratin 78;Krt78 protein (Fragment);Krt78 protein (Fragment);Keratin Kb40	A1L0X5_MOUSE;E9Q0F0_MOUSE;Q0VDM9_MOUSE;Q0VDN0_MOUSE;Q6IFT3_MOUSE		20038.4	17770.3	1680.57	2032.8	40782	57040.5	10240.8	4809.32	4656.39	3986.69	2729.12	2477.19	6919.58	3126.97	2026.95	1907.83
Gpr37l1	G protein-coupled receptor 37-like 1;G-protein coupled receptor 37-like 1	A1L151_MOUSE;G37L1_MOUSE		605.917	581.677	337.949	334.048	534.9	526.228	385.683	343.896	239.353	269.67	329.114	322.312	471.47	493.703	217.668	405.328
Emc1	ER membrane protein complex subunit 1;ER membrane protein complex subunit 1;Isoform 2 of ER membrane protein complex subunit 1;ER membrane protein complex subunit 1	A1L2Z3_MOUSE;EMC1_MOUSE;EMC1_MOUSE;Z4YJW0_MOUSE		171.272	171.209	101.965	110.578	132.266	122.188	108.997	101.182	187.715	190.81	146.377	127.81	156.239	164.484	141.973	130.82
Amz1	Archaelysin family metallopeptidase 1;Archaemetzincin-1;Archaemetzincin-1	A1L312_MOUSE;Q3U2S0_MOUSE;AMZ1_MOUSE		96.0586	94.0784	76.0785	95.2979	64.8387	71.7587	63.5242	52.1845	77.3873	72.9576	62.1789	77.6796	91.4952	91.1142	103.884	99.2755
Nbr1	Neighbor of Brca1 gene 1;NBR1, autophagy cargo receptor;NBR1, autophagy cargo receptor;NBR1, autophagy cargo receptor;Next to BRCA1 gene 1 protein;NBR1, autophagy cargo receptor	A1L329_MOUSE;A2A4N5_MOUSE;A2A4N8_MOUSE;K3W4P1_MOUSE;NBR1_MOUSE;Q05BC8_MOUSE		76.923	86.7437	73.8603	78.8988	84.7668	68.5498	72.5138	70.5743	65.5853	51.9641	42.3922	49.7132	52.7766	49.7164	101.777	75.9132
Rapgef1	Rap guanine nucleotide exchange factor (GEF) 1	A1L338_MOUSE;Q3UHC1_MOUSE		1545.29	1532.48	1428.85	1465.1	1749.87	1635.63	1689.7	1647.27	1270.72	1347.42	1291.47	1367.43	1335.09	1359.57	1308.42	1408.99
Dyrk1a	Dual specificity tyrosine-phosphorylation-regulated kinase 1A	A1L341_MOUSE		334.261	351.211	248.585	245.945	275.469	283.964	249.904	243.214	232.576	231.251	205.689	219.64	239.273	238.404	293.5	303.031
Hspa1l;;Hspa1l	Heat shock 70 kDa protein 1-like	A1L347_MOUSE;B2CSK2_MOUSE;HS71L_MOUSE		14400.3	13384.7	14718.4	14218.6	14093.1	14389.2	14723	15280.5	14614.6	14486.2	13990.4	15030.2	12892.4	13527.3	16077.5	16632.2
Tgfbi	Transforming growth factor-beta-induced protein ig-h3;Transforming growth factor-beta-induced protein ig-h3;Transforming growth factor-beta-induced protein ig-h3;Transforming growth factor-beta-induced protein ig-h3 (Fragment);Transforming growth factor-beta-induced protein ig-h3;Transforming growth factor-beta-induced protein ig-h3	A1L353_MOUSE;A1L354_MOUSE;BGH3_MOUSE;Q3TDZ5_MOUSE;Q3UBG4_MOUSE;Q3UXJ2_MOUSE		69.7588	74.707	65.0942	53.2764	52.7926	61.9696	52.8363	62.4159	68.6085	75.2844	53.4694	60.5401	50.9823	63.5484	75.0055	71.6203
Tbk1	TANK-binding kinase 1;Serine/threonine-protein kinase TBK1	A1L361_MOUSE;TBK1_MOUSE		242.987	240.214	176.115	187.572	234.387	229.114	214.01	216.821	143.961	146.188	138.754	145.943	173.007	166.136	142.542	162.882
Psmd7	Proteasome (Prosome, macropain) 26S subunit, non-ATPase, 7;26S proteasome non-ATPase regulatory subunit 7	A1L3B8_MOUSE;PSMD7_MOUSE		8131.84	8315.28	7898.32	7790.93	9842.76	10213.7	8917.43	9021.86	9221.56	8896.84	9469.79	8940.75	8828.74	9027.99	8398.16	9086.57
Slc9a6	Sodium/hydrogen exchanger 6;Sodium/hydrogen exchanger (Fragment)	SL9A6_MOUSE;Q80U52_MOUSE		748.519	776.901	691.929	657.3	658.104	672.067	618.881	643.916	558.211	509.964	652.721	623.789	648.791	615.963	604.888	604.908
Sgsh	N-sulfoglucosamine sulfohydrolase (Sulfamidase);N-sulfoglucosamine sulfohydrolase (Fragment);Mutant heparan N-sulfatase;Heparan N-sulfatase	A1L3T3_MOUSE;Q3URR4_MOUSE;Q9EQ07_MOUSE;Q9EQ08_MOUSE		NaN	NaN	49.5284	43.436	33.4631	NaN	48.2752	53.0794	69.342	62.1472	59.1989	54.5291	NaN	40.0856	69.2508	65.5459
Fgfr2	Fibroblast growth factor receptor;Fibroblast growth factor receptor;Fibroblast growth factor receptor;Fibroblast growth factor receptor;Fibroblast growth factor receptor;Fibroblast growth factor receptor;Fibroblast growth factor receptor;Fibroblast growth factor receptor;Fibroblast growth factor receptor;Fibroblast growth factor receptor;Fibroblast growth factor receptor 2;Fibroblast growth facto…	A1YYM3_MOUSE;A1YYM4_MOUSE;A1YYM5_MOUSE;A1YYM6_MOUSE;A1YYM7_MOUSE;A1YYM8_MOUSE;A1YYM9_MOUSE;A1YYN0_MOUSE;A1YYN1_MOUSE;A1YYN2_MOUSE;A1YYN4_MOUSE;A1YYN5_MOUSE;A1YYN6_MOUSE;A1YYN7_MOUSE;A1YYN8_MOUSE;A1YYN9_MOUSE;A1YYP0_MOUSE;A1YYP1_MOUSE;B7ZWP2_MOUSE;B9EKY4_MOUSE;D3Z5M8_MOUSE;E9PVU6_MOUSE;E9PX60_MOUSE;E9PX67_MOUSE;E9PX88_MOUSE;E9PX90_MOUSE;E9PXV8_MOUSE;E9Q5C2_MOUSE;E9Q5C3_MOUSE;E9Q700_MOUSE;E9Q708_MO…		60.0178	52.9046	56.668	51.1433	47.3252	53.54	43.4201	55.157	41.1624	46.9725	47.4625	48.5528	59.4231	65.6205	60.9817	55.3867
Nphp1	Nephrocystin 1 variant 1	A1Z2X7_MOUSE		110.845	144.809	108.513	99.0266	102.925	103.6	84.3083	86.8998	94.4764	87.0604	80.9686	63.929	93.0093	87.4637	125.637	120.041
Cul4b	Cullin-4B	CUL4B_MOUSE		1368.39	1418.76	1345.33	1402.79	1554.79	1511.21	1466.98	1470.07	1466.56	1510.53	1453.24	1441.64	1477.35	1491.62	1407.91	1455.14
Ncoa3	Nuclear receptor coactivator;Ncoa3 protein (Fragment);Nuclear receptor coactivator;Nuclear receptor coactivator;Nuclear receptor coactivator	A2A468_MOUSE;A5D6Q2_MOUSE;B2RUJ1_MOUSE;Q05BA5_MOUSE;Q3UQL7_MOUSE		174.195	150.45	131.001	105.662	121.923	116.414	121.181	130.575	126.922	123.139	107.84	131.418	128.445	107.839	145.762	170.927
Tox2	TOX high mobility group box family member 2	A2A472_MOUSE;A2A473_MOUSE;E9Q0B9_MOUSE		114.006	107.993	123.953	109.796	119.803	135.355	167.629	148.026	146.13	135.851	144.622	169.496	159.101	134.677	120.583	124.688
Plcg1	1-phosphatidylinositol 4,5-bisphosphate phosphodiesterase gamma;1-phosphatidylinositol 4,5-bisphosphate phosphodiesterase gamma-1	A2A4A6_MOUSE;PLCG1_MOUSE		2702.16	2725.53	2778.43	2812.47	2955.94	2913.32	2892.7	2802.57	2705.58	2768.72	2844	2904.67	2801.05	2843.59	2980	3086.04
Lpin3	phosphatidate phosphatase;phosphatidate phosphatase;phosphatidate phosphatase;phosphatidate phosphatase (Fragment);Phosphatidate phosphatase LPIN3	A2A4B1_MOUSE;A2A4B3_MOUSE;Q149B0_MOUSE;Q571G1_MOUSE;LPIN3_MOUSE		NaN	NaN	31.0381	38.7898	52.9579	NaN	NaN	NaN	67.8292	NaN	NaN	45.3706	NaN	NaN	26.9203	32.0586
Dhx8	RNA helicase (Fragment);ATP-dependent RNA helicase DHX8;RNA helicase;RNA helicase (Fragment)	A2A4N9_MOUSE;DHX8_MOUSE;Q3UQQ4_MOUSE;Q5DTN5_MOUSE		28.7952	21.5494	27.3312	26.8733	31.595	28.7557	23.9983	21.6115	17.0951	23.1469	26.5091	27.8083	19.1121	21.8974	23.5984	35.0491
Slc13a3	Solute carrier family 13 (sodium-dependent dicarboxylate transporter), member 3;Solute carrier family 13 member 3;Na(+)/dicarboxylate cotransporter 3	A2A4U9_MOUSE;Q3UUJ6_MOUSE;S13A3_MOUSE		NaN	35.0443	20.8534	34.892	20.1353	NaN	18.0451	NaN	NaN	22.9021	21.3581	9.67354	51.5049	32.2638	34.1205	18.8651
Krt10	Keratin, type I cytoskeletal 10;Keratin, type I cytoskeletal 10;Isoform 2 of Keratin, type I cytoskeletal 10;Isoform 3 of Keratin, type I cytoskeletal 10	A2A513_MOUSE;K1C10_MOUSE;K1C10_MOUSE;K1C10_MOUSE		12954.5	14143	3815.67	3760.31	12410.5	12592	6729.83	7186.15	6032.31	5611.36	5803.96	6091.68	6050.32	6420.78	8157.46	8050.69
Dnah17	Dynein, axonemal, heavy chain 17;Dynein, axonemal, heavy chain 17;Dynein, axonemal, heavy chain 17;Dynein axonemal heavy chain 17;Isoform 2 of Dynein axonemal heavy chain 17	A2A520_MOUSE;E9Q7P0_MOUSE;K3W4R0_MOUSE;DYH17_MOUSE;DYH17_MOUSE		413.401	257.821	232.366	272.339	143.759	65.9817	135.202	122.226	184.56	179.326	93.6356	155.038	130.636	150.75	539.614	601.135
Cacnb1	Voltage-dependent L-type calcium channel subunit beta-1	A2A543_MOUSE;CACB1_MOUSE		123.878	122.38	110.22	122.373	108.543	118.5	115.565	124.606	113.832	111.075	98.4967	98.1618	112.498	115.667	92.5888	93.961
Rpl19	Ribosomal protein L19;Large ribosomal subunit protein eL19;Ribosomal protein L19	A2A547_MOUSE;RL19_MOUSE;Q5I0T8_MOUSE		893.611	864.895	929.513	1025.82	1187.32	1041.56	832.486	872.996	1040.78	1018.6	779.022	717.775	1333.7	1055.77	1354.58	1224.3
Ywhab	14-3-3 protein beta/alpha;14-3-3 protein beta/alpha;Isoform Short of 14-3-3 protein beta/alpha	A2A5N2_MOUSE;1433B_MOUSE;1433B_MOUSE		37456.9	38443.4	35788.7	36154.6	37937.8	38277.3	41675.5	39315.6	37858.7	38379	36211.8	36214.7	39471.3	39739.1	41867.4	42331.2
Arfgef2	Brefeldin A-inhibited guanine nucleotide-exchange protein 2	BIG2_MOUSE		1465.14	1432.84	1198.38	1216.73	1672.28	1629.33	1441.46	1463.08	1346.67	1331.68	1247.75	1239.11	1430.25	1424.92	1172.35	1224.93
Stau1	Staufen double-stranded RNA binding protein 1;Staufen double-stranded RNA binding protein 1;DRBM domain-containing protein (Fragment);DRBM domain-containing protein (Fragment);DRBM domain-containing protein (Fragment);DRBM domain-containing protein (Fragment);DRBM domain-containing protein (Fragment);DRBM domain-containing protein (Fragment);Stau1 protein (Fragment);Staufen (RNA binding protein) …	A2A5R8_MOUSE;A2A5S3_MOUSE;Q3TJ07_MOUSE;Q3TU43_MOUSE;Q3TWA1_MOUSE;Q3TWP5_MOUSE;Q3UKX3_MOUSE;Q3UTC8_MOUSE;Q641P2_MOUSE;Q9DBE7_MOUSE		121.975	133.204	82.0132	86.7096	73.0076	90.0192	68.7429	79.1988	79.233	80.6418	80.864	56.0312	77.0383	95.9016	106.415	131.407
Glrx2	Glutaredoxin-2, mitochondrial;Glutaredoxin 2 (thioltransferase);Glutaredoxin-2, mitochondrial;Glutaredoxin-2, mitochondrial (Fragment);Glutaredoxin-2, mitochondrial;Isoform 2 of Glutaredoxin-2, mitochondrial	A2A5W4_MOUSE;B7ZC40_MOUSE;Q3UQ95_MOUSE;Q6P0X6_MOUSE;GLRX2_MOUSE;GLRX2_MOUSE		75.4916	NaN	35.5877	45.6731	NaN	40.0387	53.3437	44.9568	50.0689	63.7177	60.6055	62.5688	59.9655	52.0246	54.9893	69.3095
Mapt	Microtubule-associated protein	A2A5Y6_MOUSE		3115.55	3134.92	2834.65	2879.05	2521.83	2612.91	2780.07	2497.31	3255.54	3252.37	3274.67	3350.47	3483.74	3226.25	4092.75	3817.34
Smurf2	E3 ubiquitin-protein ligase SMURF2;Isoform 2 of E3 ubiquitin-protein ligase SMURF2	SMUF2_MOUSE		153.264	132.998	76.7461	87.1882	92.0468	81.0576	59.3938	54.4966	52.3242	54.2928	88.4226	68.3722	54.936	94.9509	53.9595	70.0021
Bptf	Bromodomain PHD finger transcription factor;Bromodomain PHD finger transcription factor;Bromodomain PHD finger transcription factor splice variant;Bromodomain PHD finger transcription factor;Bromodomain PHD finger transcription factor (Fragment);Bptf protein;Bptf protein (Fragment)	A2A654_MOUSE;A2A655_MOUSE;E5D6T0_MOUSE;E9Q6A7_MOUSE;Q3UPA6_MOUSE;Q6P9L3_MOUSE;Q8K092_MOUSE		17.6822	23.7428	9.33343	9.50164	13.6196	17.6262	14.5812	17.3922	5.97769	20.3497	16.1745	7.29439	14.5654	16.5189	18.3231	19.6677
Tanc2	Protein TANC2	TANC2_MOUSE		742.568	737.354	705.098	727.249	790.73	849.67	781.617	786.513	393.389	409.559	416.575	408.109	395.602	405.787	451.007	453.739
Tanc2	Isoform 2 of Protein TANC2	TANC2_MOUSE		183.325	146.284	221.59	208.242	278.353	357.9	290.048	286.323	126.267	161.875	146.72	168.558	133.204	192.009	48.3009	29.6974
Fam171a2	Protein FAM171A2	F1712_MOUSE		71.8774	56.6893	48.7699	55.3748	48.0218	38.2458	46.1938	44.9055	40.1777	32.4925	35.3649	31.2006	47.8571	51.6519	53.4115	48.8951
Gpatch8	G patch domain-containing protein 8	GPTC8_MOUSE		97.1093	89.3759	83.0136	92.4451	80.0592	107.753	110.42	88.114	73.0319	65.3801	91.7312	95.1252	93.9102	89.2066	122.616	103.363
Hsp90aa1	Heat shock protein 90, alpha (cytosolic), class A member 1 (Fragment)	A2A6A2_MOUSE		155.767	149.063	362.593	383.24	164.888	156.245	271.75	334.618	178.349	217.146	349.439	336.671	296.404	285.378	750.363	662.328
Lasp1	LIM and SH3 protein 1 (Fragment)	A2A6H1_MOUSE		194.196	290.162	437.37	331.697	360.097	351.678	402.088	382.989	434.819	449.418	371.109	391.469	415.297	376.068	190.443	235.312
Vcf1	Family with sequence similarity 104, member A	A2A6P4_MOUSE		16.8364	22.6118	32.1921	50.418	40.9889	30.6521	14.4388	22.6831	16.8663	20.5561	22.9912	45.1211	30.5319	33.6769	39.2574	49.3404
Cdc27	Cell division cycle protein 27 homolog;Isoform 3 of Cell division cycle protein 27 homolog	CDC27_MOUSE		279.854	297.265	236.757	238.683	298.552	305.167	265.483	281.181	275.161	249.523	252.198	246.723	279.245	276.535	258.266	264.451
Myl4	Myosin, light polypeptide 4 (Fragment);Myosin light chain 4;Myosin, light polypeptide 4	A2A6Q8_MOUSE;MYL4_MOUSE;Q9CZ19_MOUSE		236.282	239.608	222.383	215.89	216.871	251.449	225.258	230.906	215.117	202.128	169.668	186.127	152.806	194.296	199.377	196.105
Cdr2l	Cerebellar degeneration-related protein 2-like;Cerebellar degeneration-related protein 2-like;Cdr2l protein	CDR2L_MOUSE;B2RWR4_MOUSE;B7ZMV4_MOUSE		518.776	497.552	567.992	503.973	508.732	588.762	588.386	549.346	550.991	531.813	603.482	613.784	522.668	555.458	538.782	558.158
Mrpl58	Mitochondrial ribosomal protein L58;Large ribosomal subunit protein mL62	A2A6T4_MOUSE;ICT1_MOUSE		220.706	173.815	103.756	121.737	251.74	197.397	189.949	177.579	231.544	209.638	163.793	185.464	204.604	193.3	165.437	195.004
Osbpl7	Oxysterol-binding protein	A2A716_MOUSE		606.303	562.568	560.07	588.703	596.95	621.182	576.704	574.282	565.735	581.384	586.082	604.078	537.047	535.758	622.634	613.025
H6pd	Hexose-6-phosphate dehydrogenase (glucose 1-dehydrogenase);GDH/6PGL endoplasmic bifunctional protein	A2A7A7_MOUSE;G6PE_MOUSE		64.8253	97.882	85.2433	66.8379	70.7328	51.388	71.1307	68.5169	96.5992	89.2412	73.9836	75.6574	71.8845	100.004	97.0497	81.6523
Clcn6;Clcn6;Clcn6;mKIAA0046	Chloride channel protein;H(+)/Cl(-) exchange transporter 6;Chloride channel protein;Chloride channel protein (Fragment)	A2A7F6_MOUSE;CLCN6_MOUSE;Q3UM91_MOUSE;Q5DU51_MOUSE		105.913	134.664	92.4879	88.3658	106.911	104.022	90.6698	92.9518	117.317	113.104	77.4876	74.1132	140.673	127.618	76.0971	103.06
Mthfr	Methylenetetrahydrofolate reductase;Methylenetetrahydrofolate reductase (Fragment);Methylenetetrahydrofolate reductase (NADPH)	A2A7F7_MOUSE;F6Z4F8_MOUSE;MTHR_MOUSE		129.804	147.931	136.373	138.808	109.66	125.492	118.162	109.807	108.202	98.342	105.48	122.797	131.969	138.86	137.659	142.411
Mad2l2	Mitotic spindle assembly checkpoint protein MAD2B (Fragment);Mitotic spindle assembly checkpoint protein MAD2B;Mitotic spindle assembly checkpoint protein MAD2B	A2A7G6_MOUSE;A2A7G7_MOUSE;MD2L2_MOUSE		NaN	NaN	34.3421	NaN	86.8557	NaN	NaN	NaN	NaN	NaN	59.884	48.0016	64.9534	72.7966	67.3075	55.608
Fbxo44	F-box protein 44 (Fragment);F-box protein 44	A2A7H4_MOUSE;A2A7H5_MOUSE		976.532	913.107	985.261	974.332	1095.13	1038.85	1168.74	1189.04	891.519	1084.42	1293.17	1218.94	1015.79	1092.06	1186.24	1092.17
Fbxo44	F-box protein 44	A2A7H6_MOUSE		116.72	163.525	136.94	114.655	151.531	144.777	143.709	139.635	136.475	167.472	198.636	120.419	138.368	115.546	167.28	192.368
Yars1	Tyrosine--tRNA ligase	A2A7S7_MOUSE		333.998	212.156	298.645	252.884	254.634	314.504	333.741	264.993	254.309	258.729	278.604	263.161	312.277	289.947	230.592	246.964
Zmym1	Zinc finger, MYM domain containing 1;Zinc finger, MYM domain containing 1	A2A7T8_MOUSE;Q3TJB1_MOUSE		41.9508	54.4682	48.4732	48.9466	61.5209	50.4828	56.8753	56.9617	55.3	57.8298	51.5902	49.753	48.8249	49.5881	46.4334	55.4904
Btf3l4	Transcription factor BTF3;Transcription factor BTF3 (Fragment);Transcription factor BTF3 homolog 4	A2A7Z4_MOUSE;Q78IG7_MOUSE;BT3L4_MOUSE		105.147	94.8211	47.029	47.6513	66.9969	67.0318	54.7714	60.1361	79.6883	88.6463	58.723	74.0932	63.475	80.9939	113.251	110.131
Park7	protein deglycase;Parkinson disease protein 7 homolog	A2A813_MOUSE;PARK7_MOUSE		699.384	683.987	727.03	712.359	785.171	839.777	788.95	776.283	874.619	860.571	756.1	834.53	772.316	803.08	902.271	1027.39
Epb41	Protein 4.1;Protein 4.1;Isoform 2 of Protein 4.1	A2A841_MOUSE;EPB41_MOUSE;EPB41_MOUSE		119.783	104.931	97.3402	87.4465	79.9167	84.3623	79.0413	81.6079	110.405	110.723	112.857	112.625	88.8164	125.809	130.586	119.388
Hivep3	Transcription factor HIVEP3	ZEP3_MOUSE		49.4457	31.3837	37.9802	37.8436	41.218	46.4486	40.3215	41.1776	33.8797	35.7588	38.6228	30.8402	32.7968	37.5081	59.0166	47.363
Camta1	Calmodulin-binding transcription activator 1	CMTA1_MOUSE		66.544	56.1181	56.5949	56.2197	61.2513	57.8159	58.4399	58.4886	35.8487	36.9057	27.93	37.6707	31.5237	30.0877	38.2113	47.0921
Camta1	Isoform 3 of Calmodulin-binding transcription activator 1	CMTA1_MOUSE		NaN	NaN	41.7852	49.8195	67.867	18.1725	39.5874	41.6934	22.0698	20.7357	29.6823	19.3584	9.48675	26.1233	38.6358	NaN
Lurap1	Leucine rich adaptor protein 1	A2A8F6_MOUSE;LURA1_MOUSE		150.589	156.36	136.912	119.918	157.766	124.977	158.011	130.029	114.78	132.31	122.715	132.968	119.501	145.212	241.953	244.802
Chd5	Chromodomain-helicase-DNA-binding protein 5	CHD5_MOUSE		152.312	157.189	112.669	122.003	123.292	137.636	113.89	107.888	110.559	117.571	109.317	108.348	115.057	111.065	91.3798	88.2461
Zfyve9	Zinc finger FYVE domain-containing protein	A2A8R0_MOUSE		338.615	354.03	347.776	347.573	356.178	356.581	340.092	341.479	610.949	608.369	651.882	628.705	498.797	540.1	575.068	551.92
Tut4	RNA uridylyltransferase;Terminal uridylyltransferase 4	A2A8R7_MOUSE;TUT4_MOUSE		33.1232	15.515	26.2106	23.2113	29.0275	33.2377	24.2256	24.4863	23.8786	22.5579	20.8622	23.242	27.0111	26.0033	37.0804	32.837
Srrm1	Serine/arginine repetitive matrix 1;Serine/arginine repetitive matrix 1;Serine/arginine repetitive matrix 1;Serine/arginine repetitive matrix 1;Serine/arginine repetitive matrix protein 1;Isoform 2 of Serine/arginine repetitive matrix protein 1	A2A8V8_MOUSE;A2A8V9_MOUSE;E9PUK6_MOUSE;E9QKA4_MOUSE;SRRM1_MOUSE;SRRM1_MOUSE		43.5081	34.7494	34.9269	34.1259	27.431	41.2654	42.5441	36.7653	42.9377	43.5763	41.8118	37.1349	44.1555	52.4071	60.9953	76.4197
Mknk1	MAP kinase-interacting serine/threonine-protein kinase 1	A2A8W8_MOUSE;MKNK1_MOUSE;Q3TDV2_MOUSE;Q3U1I8_MOUSE;Q3V457_MOUSE		70.5893	105.638	93.2608	89.4295	72.9498	69.9021	73.2944	58.9559	87.7512	83.8002	73.7649	80.9202	71.0032	69.9632	75.7291	73.7835
Osbpl9	Oxysterol-binding protein-related protein 9;Oxysterol-binding protein	OSBL9_MOUSE;E9PXZ2_MOUSE		1109.41	1153.12	1107.93	1146.92	1086.43	1120.4	1149.85	1191.85	1083.89	989.016	1109.53	1096.37	1164.14	1095.71	1228.03	1136.19
Szt2	KICSTOR complex protein SZT2;Isoform 2 of KICSTOR complex protein SZT2	SZT2_MOUSE		131.084	108.745	83.3162	96.8019	112.662	129.27	98.5931	135.835	106.078	113.894	68.2878	56.8359	105.949	124.22	103.577	84.3318
Lrrc37	Predicted gene 884;Predicted gene 884;Leucine-rich repeat-containing protein 37A2	A2A9H6_MOUSE;E9Q472_MOUSE;Q3V3Y5_MOUSE		300.219	243.437	266.497	286.755	257.238	287.408	198.664	252.049	323.421	280.313	228.754	263.344	286.28	258.45	NaN	191.539
Gosr2	Golgi SNAP receptor complex member 2	A2A9I0_MOUSE;GOSR2_MOUSE		158.404	155.499	110.905	125.646	101.555	127.105	107.944	92.9053	161.754	167.103	145.421	147.46	133.254	119.631	114.144	105.006
Dock7	Dedicator of cytokinesis 7;Dedicator of cytokinesis 7;Dedicator of cytokinesis protein 7;Isoform 2 of Dedicator of cytokinesis protein 7	A2A9M4_MOUSE;A2A9M5_MOUSE;DOCK7_MOUSE;DOCK7_MOUSE		277.698	275.421	226.293	218.103	252.725	274.26	247.839	247.43	193.311	206.287	183.854	180.218	238.76	232.068	242.86	231.858
Cdk11b	Cyclin-dependent kinase 11B	A2A9P6_MOUSE;CD11B_MOUSE		157.162	167.039	123.69	117.155	149.294	150.114	123.47	125.384	104.77	128.076	103.616	106.548	110.34	124.596	148.794	115.97
Nrdc	Nardilysin, N-arginine dibasic convertase, NRD convertase 1;Nardilysin	A2A9Q2_MOUSE;NRDC_MOUSE		839.213	821.36	747.679	749.695	910.396	914.282	904.321	879.002	950.756	933.246	844.993	828.907	840.737	899.305	835.817	876.118
Tbkbp1	TANK-binding kinase 1-binding protein 1;Isoform 2 of TANK-binding kinase 1-binding protein 1;TBK1 binding protein 1	TBKB1_MOUSE;TBKB1_MOUSE;Z4YKN2_MOUSE		18.7047	NaN	NaN	26.7657	21.7286	43.8738	28.9755	44.486	37.2631	NaN	25.0144	21.4193	44.3967	NaN	NaN	74.6979
Kctd2	Potassium channel tetramerisation domain containing 2	A2A9V9_MOUSE;Q4VBE7_MOUSE		346.497	347.19	377.354	364.189	261.767	286.911	251.047	258.009	309.011	307.741	315.031	317.479	247.418	248.206	297.718	288.767
Mif4gd	MIF4G domain containing;MIF4G domain-containing protein	A2A9W3_MOUSE;MI4GD_MOUSE		141.269	143.532	139.1	136.947	228.466	219.872	146.543	173.124	121.716	158.935	167.862	143.242	222.488	181.766	118.689	80.5707
Gga3	Golgi associated, gamma adaptin ear containing, ARF binding protein 3;ADP-ribosylation factor-binding protein GGA3	A2A9W7_MOUSE;GGA3_MOUSE		821.861	930.056	821.246	869.964	955.852	915.661	875.282	912.63	910.576	969.545	940.485	873.319	911.49	902.112	915.028	820.909
Cyp4x1	Cytochrome P450, family 4, subfamily x, polypeptide 1;Cytochrome P450 4X1	A2A9Y7_MOUSE;CP4X1_MOUSE		176.752	174.677	128.62	132.82	158.801	170.993	146.741	143.02	163.527	160.216	186.186	183.138	165.305	179.802	165.112	174.119
Mettl23	Histone-arginine methyltransferase METTL23	MET23_MOUSE		184.188	146.547	165.917	167.879	145.862	189.178	172.529	159.253	146.616	181.666	183.637	181.451	161.53	171.296	218.886	235.934
Sec24a	Sec24 related gene family, member A (S. cerevisiae)	A2AA71_MOUSE		116.045	203.052	113.765	157.756	143.347	144.6	132.055	105.105	127.706	113.313	61.5348	99.4919	105.783	86.8069	93.665	104.19
Rnf157	E3 ubiquitin-protein ligase;E3 ubiquitin-protein ligase;E3 ubiquitin ligase Rnf157;Isoform 2 of E3 ubiquitin ligase Rnf157	A2AAN9_MOUSE;A2AAP0_MOUSE;RN157_MOUSE;RN157_MOUSE		101.446	102.128	115.199	120.789	117.869	94.3713	128.015	100.674	67.9646	110.79	95.3898	92.3802	84.2955	86.2631	83.4266	75.5159
Arhgap27	Rho GTPase-activating protein 27	RHG27_MOUSE		286.601	306.427	252.934	297.436	207.348	240.447	222.242	241.058	226.582	196.844	224.538	240.642	233.383	245.356	369.251	318.911
Arhgap27	Isoform 2 of Rho GTPase-activating protein 27	RHG27_MOUSE		44.5322	48.8648	24.9931	60.4317	NaN	27.2093	35.8203	36.2019	56.2407	66.6926	69.8958	42.8074	42.1307	42.0046	101.603	85.7759
Fmnl1	Formin-like 1	A2AB60_MOUSE		577.788	646.544	622.435	636.848	751.773	755.066	707.236	697.149	727.021	614.485	725.053	718.768	588.517	718.566	623.745	570.675
Tbc1d16	TBC1 domain family, member 16;TBC1 domain family, member 16	A2ABG4_MOUSE;Q6PFC0_MOUSE		287.311	279.354	221.015	219.04	217.436	199.473	195.936	200.682	151.657	162.511	192.354	176.827	238.799	247.276	198.384	211.249
Pcyt2	ethanolamine-phosphate cytidylyltransferase;ethanolamine-phosphate cytidylyltransferase;Ethanolamine-phosphate cytidylyltransferase	A2ABY3_MOUSE;Q3USD5_MOUSE;PCY2_MOUSE		887.133	816.876	938.506	946.862	961.742	942.622	920.995	944.937	947.778	904.574	948.962	969.399	938.612	915.639	880.325	924.72
D630003M21Rik;	RIKEN cDNA D630003M21 gene;Uncharacterized protein KIAA1755 homolog	A2AC60_MOUSE;K1755_MOUSE		87.2454	85.9417	70.2318	79.8226	93.9473	91.5786	73.7284	95.5265	94.8769	86.0964	85.8651	86.5626	87.1109	83.1486	36.8537	NaN
Ppp1r16b	Protein phosphatase 1, regulatory subunit 16B (Fragment);Protein phosphatase 1 regulatory inhibitor subunit 16B;Uncharacterized protein;Protein phosphatase 1 regulatory inhibitor subunit 16B	A2AC90_MOUSE;Q544H9_MOUSE;Q8C9G4_MOUSE;PP16B_MOUSE		16.8289	12.2863	11.9877	11.091	NaN	NaN	8.63629	NaN	19.5931	NaN	NaN	NaN	NaN	6.82082	18.7678	NaN
Ralgapb	Ral GTPase activating protein, beta subunit (non-catalytic)	A2ACC6_MOUSE		333.276	336.174	256.159	271.077	361.45	367.645	339.315	337.161	246.182	247.214	188.481	205.261	238.458	246.581	232.155	222.547
Rpn2	Dolichyl-diphosphooligosaccharide--protein glycosyltransferase subunit 2;Dolichyl-diphosphooligosaccharide--protein glycosyltransferase subunit 2 (Fragment);Dolichyl-diphosphooligosaccharide--protein glycosyltransferase subunit 2;Dolichyl-diphosphooligosaccharide--protein glycosyltransferase subunit 2	A2ACG7_MOUSE;Q3U505_MOUSE;Q61833_MOUSE;RPN2_MOUSE		215.046	183.069	147.65	138.565	144.137	126.263	129.443	126.128	204.047	201.376	176.878	175.193	204.305	210.302	252.673	246.448
Faap100	Fanconi anemia core complex-associated protein 100	FP100_MOUSE		213.316	220.735	210.811	183.951	186.638	202.197	187.688	207.319	168.101	173.525	168.886	162.214	182.006	193.001	220.742	248.763
Nptx1	Neuronal pentraxin 1;Neuronal pentraxin-1	A2ACL9_MOUSE;NPTX1_MOUSE		1204.34	1259.05	1031.77	1051.27	1228.3	1283.5	1217.59	1087	1260.3	1280.55	1245.96	1218.74	956.02	937.825	1046.17	1013.79
Ttc39a	Tetratricopeptide repeat protein 39A;Isoform 2 of Tetratricopeptide repeat protein 39A	TT39A_MOUSE		4519.79	2866.14	2920.37	3406.05	3054.41	3330.96	3196.69	3360.15	3726.98	3313.34	4130.63	4019.7	3029.65	4181.57	3188.69	3249.19
Chm	Rab proteins geranylgeranyltransferase component A	A2AD03_MOUSE		843.33	830.276	793.828	784.132	933.83	953.267	874.155	902.433	919.618	896.509	841.098	876.761	900.82	903.09	776.309	840.339
Stk26	non-specific serine/threonine protein kinase;non-specific serine/threonine protein kinase;Serine/threonine-protein kinase 26	A2AD84_MOUSE;A2AD85_MOUSE;STK26_MOUSE		312.824	348.081	313.955	318.72	253.913	187.195	225.749	200.003	215.389	237.55	168.706	209.172	366.795	413.368	208.818	262.36
Pusl1	tRNA pseudouridine synthase-like 1	PUSL1_MOUSE		136.172	97.2045	115.827	103.864	113.821	NaN	78.9737	104.576	83.7042	190.494	95.0877	79.4116	107.695	93.9778	151.998	114.325
Acap3	Arf-GAP with coiled-coil, ANK repeat and PH domain-containing protein;Arf-GAP with coiled-coil, ANK repeat and PH domain-containing protein	A2ADA6_MOUSE;Q6NXL5_MOUSE		854.636	835.054	936.11	910.908	941.497	1045.15	961.928	972.699	542.825	564.207	546.646	544.7	588.094	653.533	751.759	724.298
Plekhm2	Pleckstrin homology domain containing, family M (with RUN domain) member 2;Pleckstrin homology domain-containing family M member 2;Isoform 2 of Pleckstrin homology domain-containing family M member 2;Pleckstrin homology domain containing, family M (with RUN domain) member 2	A2ADE0_MOUSE;PKHM2_MOUSE;PKHM2_MOUSE;Z4YJW6_MOUSE		1005.43	944.087	966.313	1006.36	1023.12	1012.85	1026.03	1072.36	1157.39	1184.77	1240.43	1231.96	1066.86	1081.97	1219.74	1309.18
Zfp831	Zinc finger protein 831	A2ADM8_MOUSE		NaN	NaN	NaN	NaN	NaN	36.5613	NaN	37.0591	21.8913	NaN	30.4829	NaN	42.2279	25.1457	NaN	NaN
Ddi2	Protein DDI1 homolog 2	DDI2_MOUSE		1629.88	1688.21	1491.95	1487	1635.34	1512.67	1555.92	1500.62	1726.71	1551.71	1561.78	1630.88	1605.31	1562.3	1729.04	1780.22
Morf4l2	Mortality factor 4-like protein 2 (Fragment);Mortality factor 4-like protein 2 (Fragment);Mortality factor 4-like protein 2;Mortality factor 4-like protein 2;Mortality factor 4-like protein 2	A2AEB3_MOUSE;A2AEB4_MOUSE;Q3TME1_MOUSE;Q3TXN7_MOUSE;MO4L2_MOUSE		97.2679	104.288	88.8033	106.447	86.4455	88.5053	61.2943	107.552	70.3385	86.1042	70.9558	98.6353	78.194	63.0468	67.5565	61.2177
Tceal3	Transcription elongation factor A (SII)-like 3 (Fragment);Transcription elongation factor A protein-like 3	A2AEC2_MOUSE;TCAL3_MOUSE		695.017	678.392	723.222	597.201	440.845	369.617	457.068	565.461	681.545	634.689	741.564	663.888	449.929	486.957	432.596	552.466
Henmt1	Small RNA 2'-O-methyltransferase	A2AED5_MOUSE		NaN	141.854	NaN	160.214	207.424	NaN	185.252	189.951	NaN	211.51	241.189	188.454	143.983	176.537	NaN	248.588
Gpm6b	Glycoprotein m6b	A2AEG6_MOUSE		3389.49	3277.29	2996.03	3369.83	2373.73	2359.27	2350.34	2260.15	2400.24	2370.7	2325.74	2335.46	2808.29	2741.99	3042.12	3185.21
Clcc1	Chloride channel CLIC-like protein 1	A2AEM2_MOUSE;CLCC1_MOUSE		66.3573	73.9026	60.7379	54.3344	64.2475	62.2728	65.661	67.8712	68.2716	93.4156	69.2591	74.6264	73.4931	80.0131	56.7846	78.4329
Pqbp1	Polyglutamine-binding protein 1	A2AER7_MOUSE;PQBP1_MOUSE		271.017	224.794	195.02	227.41	219.784	256.1	214.211	209.583	206.916	172.95	237.846	191.274	236.352	224.529	303.595	283.873
Otud5	ubiquitinyl hydrolase 1;ubiquitinyl hydrolase 1;ubiquitinyl hydrolase 1;OTU domain-containing protein 5;Isoform 2 of OTU domain-containing protein 5	A2AES3_MOUSE;A2AES4_MOUSE;A2AES5_MOUSE;OTUD5_MOUSE;OTUD5_MOUSE		205.714	196.895	227.376	218.023	231.041	236.673	250.411	241.225	221.717	220.719	236.622	222.141	201.924	209.8	258.562	276.238
Ccdc120	Coiled-coil domain-containing protein 120	CC120_MOUSE		1080.49	1118.18	879.145	906.24	957.541	988.316	883.444	959.853	871.232	958.476	708.637	677.268	773.03	730.13	770.749	936.709
Tfe3	Transcription factor E3;Transcription factor E3;BHLH domain-containing protein (Fragment);Transcription factor E3;Isoform 2 of Transcription factor E3;Isoform 3 of Transcription factor E3;Isoform 4 of Transcription factor E3	A2AEW0_MOUSE;A2AEW1_MOUSE;Q3U1L5_MOUSE;TFE3_MOUSE;TFE3_MOUSE;TFE3_MOUSE;TFE3_MOUSE		181.404	144.828	153.303	196.948	133.577	143.956	121.37	114.724	72.566	120.027	102.344	84.8177	84.0788	120.532	229.89	241.244
Gripap1	GRIP1 associated protein 1 (Fragment)	A2AEW6_MOUSE		241.073	254.906	292.917	331.27	332.226	300.031	216.903	300.815	180.247	97.5307	244.391	221.06	220.343	265.199	266.17	280.452
Gripap1	GRIP1 associated protein 1	A2AEW8_MOUSE		8039.31	6891.53	5862.66	5856.14	6871.83	6472.59	6128.26	5819.56	5558.3	5478.47	4522.58	4970.57	5015.35	5092.35	2943.03	3226.07
Kcnd1	Potassium voltage-gated channel, Shal-related family, member 1;Potassium voltage-gated channel subfamily D member 1	A2AEX0_MOUSE;KCND1_MOUSE		NaN	28.668	10.9714	NaN	16.3206	NaN	NaN	NaN	38.1299	17.9095	NaN	NaN	NaN	NaN	16.2096	17.736
Fhl1	Four and a half LIM domains 1;Four and a half LIM domains 1;Four and a half LIM domains protein 1	A2AEX6_MOUSE;A2AEX8_MOUSE;FHL1_MOUSE		1993.12	2085.89	1941.07	2022.1	2081.56	2132.04	1762.13	1809.77	1924.31	1845.19	2231.51	2133.18	2710.16	2759.11	2570.42	2603.85
Stag2	Cohesin subunit SA;Cohesin subunit SA-2	A2AFF6_MOUSE;STAG2_MOUSE		NaN	71.1759	41.8247	48.9147	20.3854	NaN	NaN	37.1008	84.3314	95.144	24.5975	51.8596	44.7127	26.6997	85.9933	80.0086
L1cam	L1 cell adhesion molecule	A2AFG8_MOUSE;Q6PGJ3_MOUSE		331.93	325.18	302.701	296.7	203.678	202.691	207.573	200.512	277.811	261.083	272.663	260.049	302.016	284.763	355.946	348.64
Pfkfb1	6-phosphofructo-2-kinase/fructose-2, 6-biphosphatase 1;6-phosphofructo-2-kinase/fructose-2,6-bisphosphatase 1;Isoform 2 of 6-phosphofructo-2-kinase/fructose-2,6-bisphosphatase 1	A2AFM9_MOUSE;F261_MOUSE;F261_MOUSE		164.566	112.261	101.263	123.603	163.786	277.972	131.978	150.338	211.937	144.269	138.894	141.989	203.997	181.73	207.691	193.137
Huwe1	HECT-type E3 ubiquitin transferase;E3 ubiquitin-protein ligase HUWE1	A2AFQ0_MOUSE;HUWE1_MOUSE		6137.22	6264.86	5736.01	5817.06	6045.61	6150.56	6146.61	6262.13	6331.75	6250.59	5957.75	6073.32	6053.09	6095.19	6277.91	6129.3
Dnajb5	DnaJ heat shock protein family (Hsp40) member B5	A2AG30_MOUSE		467.853	456.629	389.914	392.413	537.493	518.76	442.84	449.998	266.481	268.734	236.414	262.019	285.458	298.09	321.971	305.885
Map7d2	MAP7 domain-containing protein 2	MA7D2_MOUSE		1525.82	1515.66	1423.44	1373.96	1404.05	1431.8	1333.14	1368.58	1041.1	1062.68	942.889	886.567	1093.8	1092.53	1002.44	1077.98
Tesk2	Testis-specific kinase 2;dual-specificity kinase;Dual specificity testis-specific protein kinase 2	A2AGD9_MOUSE;Q8C0B6_MOUSE;TESK2_MOUSE		127.836	110.808	97.0582	113.139	116.007	142.363	130.775	143.798	99.9832	108.651	119.339	107.445	86.5651	105.329	80.0341	135.252
Bbox1	Butyrobetaine (gamma), 2-oxoglutarate dioxygenase 1 (gamma-butyrobetaine hydroxylase) (Fragment);Gamma-butyrobetaine dioxygenase	A2AGK3_MOUSE;BODG_MOUSE		NaN	NaN	35.9467	16.0468	40.4279	40.1107	45.2228	29.9221	44.8306	22.7656	44.0827	55.2616	51.3046	52.9338	38.4093	39.6988
Madd	MAP kinase-activating death domain protein	A2AGQ4_MOUSE		8490.66	8462.1	8473.72	8704.96	8214.25	8074.67	8657.18	8692.94	8910.95	8854.07	9137.63	8923.87	7744.64	7905.51	8997.28	9290.48
Madd	MAP kinase-activating death domain protein	A2AGR1_MOUSE		634.18	622.493	581.654	546.421	547.447	526.918	565.382	563.963	649.137	631.914	562.961	543.617	515.724	514.777	513.383	645.8
Trp53i11	Tumor protein p53-inducible protein 11 (Fragment);Tumor protein p53-inducible protein 11	A2AGS6_MOUSE;P5I11_MOUSE		499.711	564.473	487.071	433.449	442.177	406.659	335.226	402.964	640.928	689.897	759.938	623.879	651.656	590.052	507.969	446.313
Ambra1	Activating molecule in BECN1-regulated autophagy protein 1	AMRA1_MOUSE		209.153	227.348	195.222	191.399	206.409	198.339	181.468	175.393	140.848	152.43	132.225	142.207	135.865	131.783	179.303	168.166
Klhl8	Kelch-like 8;Kelch-like protein 8;Kelch-like protein (Fragment)	A2AH60_MOUSE;KLHL8_MOUSE;Q8CIU1_MOUSE		131.985	111.18	98.368	92.9357	68.9929	90.3825	89.6629	95.1538	70.0078	67.5883	70.8726	71.4522	80.3831	72.358	56.1239	65.0987
Lzts3	Leucine zipper putative tumor suppressor 3;Isoform 3 of Leucine zipper putative tumor suppressor 3	LZTS3_MOUSE		30.4281	33.4588	25.9339	26.6691	35.1059	38.2927	37.6133	40.373	28.6029	30.2178	33.2096	43.0758	52.8734	42.5652	47.7218	29.4379
Dgkz	Diacylglycerol kinase	A2AHK0_MOUSE		663.507	598.95	531.844	532.208	637.976	640.512	547.121	533.29	475.188	503.729	443.641	430.509	500.903	523.046	500.48	485.34
Siah1b;Siah1a;Siah1b	E3 ubiquitin-protein ligase;E3 ubiquitin-protein ligase SIAH1A;E3 ubiquitin-protein ligase SIAH1B	A2AHZ2_MOUSE;SIA1A_MOUSE;SIA1B_MOUSE		NaN	79.8379	23.3332	36.4298	130.492	132.081	45.9709	77.7176	78.7007	NaN	93.26	110.344	NaN	NaN	18.931	21.2451
Ndor1	NADPH-dependent diflavin oxidoreductase 1	NDOR1_MOUSE		252.72	267.421	237.465	229.096	287.311	256.336	230.258	222.232	274.23	257.452	238.566	266.138	271.861	263.32	244.87	241.931
Grin1	Glutamate receptor;Glutamate receptor;Glutamate receptor;Glutamate receptor;Glutamate receptor;Glutamate receptor;Glutamate receptor ionotropic, NMDA 1;Isoform 2 of Glutamate receptor ionotropic, NMDA 1;Glutamate receptor (Fragment)	A2AI14_MOUSE;A2AI16_MOUSE;A2AI17_MOUSE;A2AI19_MOUSE;A2AI20_MOUSE;A2AI21_MOUSE;NMDZ1_MOUSE;NMDZ1_MOUSE;Q3TZ31_MOUSE		77.4104	88.6759	86.318	67.9496	104.332	NaN	NaN	NaN	NaN	NaN	53.7885	NaN	NaN	139.565	NaN	NaN
Usp8	ubiquitinyl hydrolase 1;Ubiquitin carboxyl-terminal hydrolase 8	A2AI52_MOUSE;UBP8_MOUSE		266.601	269.653	240.313	243.882	270.678	255.775	241.066	269.811	265.824	252.291	268.6	271.194	259.963	261.915	280.051	289.965
Accs	Isoform 2 of 1-aminocyclopropane-1-carboxylate synthase-like protein 1	1A1L1_MOUSE		196.802	198.221	161.563	169.559	189.796	163.493	192.676	186.087	192.264	203.853	228.603	203.275	232.717	194.062	236.046	221.044
Cstpp1	Centriolar satellite-associated tubulin polyglutamylase complex regulator 1;Centriolar satellite-associated tubulin polyglutamylase complex regulator 1 (Fragment);Centriolar satellite-associated tubulin polyglutamylase complex regulator 1	A2AII6_MOUSE;Q810Q1_MOUSE;CSTP1_MOUSE		112.864	125.468	103.811	85.008	95.4895	89.6151	125.887	101.154	76.2469	73.4371	81.9616	88.0408	99.4244	119.857	74.4414	111.017
Tpm2	Tropomyosin beta chain	A2AIM4_MOUSE;TPM2_MOUSE;Q9D1R6_MOUSE		627.455	591.464	668.325	697.772	520.204	638.909	661.714	602.212	602.863	559.353	694.285	710.575	784.289	750.708	784.18	923.031
Snapc4	Small nuclear RNA activating complex, polypeptide 4;Small nuclear RNA activating complex, polypeptide 4 (Fragment);Snapc4 protein (Fragment);snRNA-activating protein complex subunit 4;Isoform 2 of snRNA-activating protein complex subunit 4;Isoform 3 of snRNA-activating protein complex subunit 4	A2AIV6_MOUSE;F7D5X7_MOUSE;Q05D51_MOUSE;SNPC4_MOUSE;SNPC4_MOUSE;SNPC4_MOUSE		49.3283	NaN	NaN	28.1117	NaN	99.113	53.0387	120.35	81.4568	69.0613	56.8866	46.8146	91.2301	94.3593	NaN	NaN
Entr1	Endosome-associated-trafficking regulator 1;Isoform 2 of Endosome-associated-trafficking regulator 1;Isoform 3 of Endosome-associated-trafficking regulator 1;Isoform 4 of Endosome-associated-trafficking regulator 1;Isoform 5 of Endosome-associated-trafficking regulator 1;Endosome-associated-trafficking regulator 1	ENTR1_MOUSE;ENTR1_MOUSE;ENTR1_MOUSE;ENTR1_MOUSE;ENTR1_MOUSE;A2AIW3_MOUSE		27.7222	19.7837	37.4934	21.1872	45.0664	57.1558	45.1508	63.3518	32.5471	NaN	NaN	35.6164	29.6476	61.3968	57.7458	NaN
Abca2	ATP-binding cassette, sub-family A (ABC1), member 2	A2AJ26_MOUSE		817.344	843.9	626.715	635.762	868.056	895.41	721.539	750.403	626.238	678.413	579.292	589.159	764.124	751.666	767.915	760.808
Fubp3	Far upstream element (FUSE) binding protein 3	A2AJ72_MOUSE;Q3TIX6_MOUSE		192.585	191.583	167.391	167.148	176.069	196.124	174.002	182.853	160.249	172.925	160.536	157.304	182.725	175.36	190.532	180.827
Ajm1	Apical junction component 1 homolog;Isoform 2 of Apical junction component 1 homolog	AJM1_MOUSE		104.204	96.2082	50.8369	52.1091	66.7978	56.2013	50.768	53.2349	NaN	37.6099	NaN	45.7141	42.7988	28.4364	49.2422	44.6371
Rpp38	Ribonuclease P/MRP 38 subunit;Ribonuclease P protein subunit p38;Ribosomal protein eL8/eL30/eS12/Gadd45 domain-containing protein (Fragment)	A2AJG0_MOUSE;RPP38_MOUSE;Q8BX36_MOUSE		143.944	144.234	160.528	164.247	164.034	134.469	137.719	174.558	141.172	157.143	132.37	147.031	135.902	140.719	184.864	222.954
Map7d1	MAP7 domain-containing protein 1	MA7D1_MOUSE		4857.73	5397.8	3767.75	3757.01	4865.97	4762.28	4046.29	4448.84	5173.9	5266.78	4368.46	4442.3	5514.65	5322.56	4625.1	5121
Map7d1	MAP7 domain containing 1	A2AJI1_MOUSE		1195.21	1128.79	811.066	869.86	1547.04	1472.81	1004.53	931.436	982.327	1051.07	1038.42	1073.19	1350.15	1406.56	339.692	305.661
Fggy	FGGY carbohydrate kinase domain-containing protein	FGGY_MOUSE		1969.85	1931.1	1771.23	1767.26	1981.27	1943.53	1767.78	1853.95	1937.6	2076.58	2061.41	2140.68	1774.73	1892.22	1914.59	1960.14
Pdp1	[Pyruvate dehydrogenase [acetyl-transferring]]-phosphatase 1, mitochondrial;[Pyruvate dehydrogenase [acetyl-transferring]]-phosphatase 1, mitochondrial	A2AJP9_MOUSE;A2AJQ0_MOUSE		408.467	422.643	376.88	363.715	265.32	266.075	301.229	272.51	319.408	313.758	330.288	346.723	310.504	310.854	314.916	315.503
Ppp1r3d	Protein phosphatase 1 regulatory subunit	A2AJW4_MOUSE		444.985	496.632	545.288	486.708	601.54	534.441	521.707	524.607	484.342	481.156	501.714	505.244	545.505	510.137	486.503	530.184
Fam217b	Family with sequence similarity 217, member B	A2AJW5_MOUSE		155.186	141.153	135.805	149.267	137.697	162.972	137.953	150.5	179.882	178.825	201.626	195.726	153.575	140.55	147.358	146.692
Frmpd1	FERM and PDZ domain-containing protein 1;FERM and PDZ domain containing 1	FRPD1_MOUSE;B2RY18_MOUSE		138.64	123.827	125.191	129.884	115.489	124.146	109.256	116.917	83.6338	88.682	100.543	107.339	105.493	100.706	101.923	98.6207
Dcaf10	DDB1- and CUL4-associated factor 10;Isoform 2 of DDB1- and CUL4-associated factor 10	DCA10_MOUSE		118.791	101.893	84.2819	84.7216	148.032	126.789	117.308	101.757	90.9243	85.0712	100.981	103.424	113.256	116.166	80.5186	83.0292
Snta1	Syntrophin, acidic 1;Alpha-1-syntrophin	A2AKD7_MOUSE;Q3UVD6_MOUSE		1114.44	1069.48	1187.38	1210.4	1180.95	1206.25	1109.36	1115.26	1094.59	1081.55	1219.65	1279.11	1179.81	1191.01	1453.85	1406.03
Focad	Focadhesin	FOCAD_MOUSE		371.855	385.396	278.192	271.745	288.758	301.712	249.105	237.411	332.765	317.075	276.528	278.688	285.607	303.433	292.127	310.71
Snap23	Synaptosomal-associated protein;Synaptosomal-associated protein 23;Synaptosomal-associated protein	A2AKH4_MOUSE;SNP23_MOUSE;Q9D3L3_MOUSE		1146.27	1005.5	879.127	930.165	761.767	1096.73	740.759	777.187	797.218	939.899	708.125	842.75	801.209	1011.6	1116.55	1136.56
Lrrc57	Leucine rich repeat containing 57 (Fragment);Leucine rich repeat containing 57;Leucine-rich repeat-containing protein 57 (Fragment);Leucine-rich repeat-containing protein 57	A2AKH7_MOUSE;Q8JZX5_MOUSE;Q9CSK4_MOUSE;LRC57_MOUSE		119.102	108.471	56.4913	83.3954	54.6594	29.7957	85.1263	46.0289	59.2442	95.4258	134.24	130.81	70.4997	38.1689	50.1532	48.4644
Alkbh3	AlkB homolog 3, alpha-ketoglutarate-dependent dioxygenase;AlkB homolog 3, alpha-ketoglutarate-dependent dioxygenase (Fragment);Alpha-ketoglutarate-dependent dioxygenase alkB homolog 3	A2AKV6_MOUSE;A2AKV7_MOUSE;ALKB3_MOUSE		141.77	140.54	109.695	138.367	125.364	162.799	107.943	137.395	120.322	152.747	133.689	145.368	152.491	102.885	192.505	204
Ntng2	Netrin G2;Netrin G2;Netrin G2;Netrin-G2;Isoform 2A of Netrin-G2;Isoform 2C of Netrin-G2;Netrin G2	A2AKW8_MOUSE;A2AKX2_MOUSE;J3QNA0_MOUSE;NTNG2_MOUSE;NTNG2_MOUSE;NTNG2_MOUSE;V9GX85_MOUSE		101.534	155.042	112.526	109.365	119.118	83.8291	103.681	86.8894	106.05	108.764	116.002	116.267	98.689	127.77	134.083	124.182
Hnrnpa3	Heterogeneous nuclear ribonucleoprotein A3;RRM domain-containing protein;Heterogeneous nuclear ribonucleoprotein A3;Hnrpa3 protein;Heterogeneous nuclear ribonucleoprotein A3	A2AL12_MOUSE;Q3UZG3_MOUSE;Q5FB19_MOUSE;Q6P6I7_MOUSE;ROA3_MOUSE		1408.41	1490.37	1737.85	1632.26	1820.96	1877.37	2003.3	1938.08	1554.64	1696.84	1889	1993.97	1933.34	1943.33	1869.86	1799.84
Agps	Alkylglycerone-phosphate synthase;Alkyldihydroxyacetonephosphate synthase, peroxisomal	A2AL50_MOUSE;ADAS_MOUSE		463.299	382.338	323.636	352.892	204.357	365.971	292.739	235.303	301.536	336.119	238.28	210.936	313.693	281.021	327.343	332.956
Asph;Asph;Asph;Asph;ASPH	Aspartate-beta-hydroxylase;Uncharacterized protein;Aspartyl/asparaginyl beta-hydroxylase;Aspartate-beta-hydroxylase;Aspartly beta-hydroxylase	A2AL85_MOUSE;Q8BQK0_MOUSE;ASPH_MOUSE;Q8CBM2_MOUSE;Q9EQ66_MOUSE		57.0508	43.6198	33.5324	42.9618	28.1614	20.266	28.7612	43.1068	28.2775	32.124	27.8001	33.9351	47.4684	57.5729	61.2557	60.5227
Med22	Mediator of RNA polymerase II transcription subunit 22 (Fragment);Mediator of RNA polymerase II transcription subunit 22;Isoform 2 of Mediator of RNA polymerase II transcription subunit 22	A2ALA4_MOUSE;MED22_MOUSE;MED22_MOUSE		211.346	232.281	200.326	199.593	218.861	265.23	291.741	227.617	277.426	254.279	198.072	254.717	216.345	272.247	256.883	222.78
Dnajc8	DnaJ (Hsp40) homolog, subfamily C, member 8;DnaJ heat shock protein family (Hsp40) member C8;DnaJ heat shock protein family (Hsp40) member C8 (Fragment);DnaJ heat shock protein family (Hsp40) member C8 (Fragment);DnaJ homolog subfamily C member 8	A2ALF2_MOUSE;D3Z4I5_MOUSE;F6QIL6_MOUSE;F6TQL3_MOUSE;DNJC8_MOUSE		34.4058	29.948	33.3465	33.9149	24.9594	35.5182	30.4144	20.4527	16.6311	30.4618	38.2747	31.7484	33.3487	NaN	46.3565	44.7593
Ptpn3	Tyrosine-protein phosphatase non-receptor type 3	PTN3_MOUSE		876.512	770.363	861.978	848.391	1121.05	1040.12	1052.2	1090.67	793.335	801.708	873.117	873.266	614.404	637.501	643.855	625.466
Atp2b3	Calcium-transporting ATPase	A2ALL9_MOUSE		536.989	561.558	504.421	539.603	396.891	407.725	403.773	418.471	441.898	443.677	473.219	445.417	464.442	474.405	587.162	562.46
Usp48	Ubiquitin carboxyl-terminal hydrolase 48	A2ALR9_MOUSE		142.601	185.336	159.399	131.939	150.123	158.669	147.376	139.782	140.046	140.2	142.338	116.553	139.008	115.753	174.067	163.006
Rap1gap	Rap1 GTPase-activating protein	A2ALS4_MOUSE		5.00211	24.1664	30.8508	17.3449	10.559	12.0101	16.4935	7.90913	5.96201	16.2212	30.4074	8.66852	29.2465	33.1725	17.8844	27.6525
Rap1gap	Isoform 2 of Rap1 GTPase-activating protein 1	RPGP1_MOUSE		7851.38	7863.33	8230.79	8105.88	6395.58	6518.06	6389.04	6400.53	6170.47	6396.05	6222.69	6119.69	7564.7	7633.4	8331.65	8211.93
Rap1gap	Isoform 3 of Rap1 GTPase-activating protein 1	RPGP1_MOUSE		NaN	NaN	89.8577	85.276	92.4722	NaN	31.022	NaN	NaN	NaN	51.2771	NaN	NaN	NaN	120.231	101.915
Rap1gap	Rap1 GTPase-activating protein (Fragment)	A2ALS7_MOUSE		3248.07	3480.33	3003.97	3347.57	2080.58	1790.67	1923.55	2046.41	1595.72	1725.42	1824.64	1903	2994.67	3212.74	2017.92	2131.79
Shroom2	Protein Shroom2;SHROOM2	SHRM2_MOUSE;A7TU71_MOUSE		230.272	221.874	182.935	178.841	192.262	179.072	190.933	183.352	187.75	190.699	180.675	185.413	187.509	170.409	223.262	197.471
Sh3gl2	SH3-domain GRB2-like 2;Endophilin-A1	A2ALV3_MOUSE;SH3G2_MOUSE		34960.9	35142.3	33923.9	33724.3	32658.7	33314.3	33383.5	33045.4	33527.4	33185.1	32024	32441.7	29681.8	29646.7	29075.5	27969.4
Ecpas	Ecm29 proteasome adaptor and scaffold (Fragment)	A2ALV9_MOUSE		60.5698	82.5392	44.5781	60.8762	41.3816	NaN	50.0855	NaN	54.7051	51.3766	90.8358	91.4783	NaN	NaN	14.6029	NaN
Zkscan16	Zinc finger with KRAB and SCAN domains 16	A2ALW2_MOUSE		278.041	239.413	213.915	235.338	394.602	299.614	288.428	277.095	263.998	270.412	227.44	238.393	386.628	375.612	276.875	306.517
Abca8b	ATP-binding cassette, sub-family A (ABC1), member 8b;ABC-type organic anion transporter ABCA8B;Isoform 2 of ABC-type organic anion transporter ABCA8B	A2AM56_MOUSE;ABC8B_MOUSE;ABC8B_MOUSE		105.873	101.71	76.5441	71.1959	67.596	70.6412	50.0909	56.3989	76.4198	79.6578	55.8354	54.109	60.6195	60.591	68.3837	66.6241
Sh2d5	Vascular SH2 domain-containing protein;SH2 domain-containing protein 5	A2AM67_MOUSE;SH2D5_MOUSE		2160.75	2112.6	2113.41	2159.04	1813.2	1818.04	1775.74	1866.57	1103.92	1098.63	1088.58	1121.15	1477.86	1526.75	1659.22	1656.95
Kif17	Kinesin family member 17	A2AM74_MOUSE		193.431	248.514	129.146	143.763	149.288	144.363	123.764	145.52	124.073	138.642	102.064	126.929	137.134	151.829	149.025	172.056
Emd	Emerin	A2AM95_MOUSE;EMD_MOUSE		631.647	658.622	577.359	560.27	426.253	487.86	455.061	398.54	562.56	655.075	543.37	595.699	593.589	597.068	489.213	477.953
RP23-436K3.4-001;Rpl10;;Rpl10	Large ribosomal subunit protein uL16;Large ribosomal subunit protein uL16 (Fragment);Large ribosomal subunit protein uL16;Large ribosomal subunit protein uL16	A2AM97_MOUSE;I7HLV2_MOUSE;Q3THJ6_MOUSE;RL10_MOUSE		775.814	857.768	525.634	495.698	727.012	752.454	551.935	552.96	568.644	566.801	396.123	380.606	762.734	724.056	574.646	571.744
Slc44a1	Choline transporter-like protein;Choline transporter-like protein;Choline transporter-like protein;Choline transporter-like protein 1;Isoform 2 of Choline transporter-like protein 1	A2AMH3_MOUSE;A2AMH4_MOUSE;A2AMH5_MOUSE;CTL1_MOUSE;CTL1_MOUSE		311.113	288.508	278.261	302.258	368.099	312.231	315.055	366.218	343.7	395.398	306.962	319.901	385.887	456.704	408.683	372.003
Cds2	Phosphatidate cytidylyltransferase;Phosphatidate cytidylyltransferase 2	A2AMQ5_MOUSE;CDS2_MOUSE		1342.99	1120.62	947.035	944.077	732.652	800.578	768.62	679.478	1633.76	1755.85	1313.89	1215	1190.81	1059.64	1654.44	1702.24
Capzb	F-actin-capping protein subunit beta;Isoform 3 of F-actin-capping protein subunit beta;F-actin-capping protein subunit beta	A2AMW0_MOUSE;CAPZB_MOUSE;Q3TRH8_MOUSE		1516.62	1449.21	928.686	872.921	1201.29	1415.88	1028.91	1030.4	969.499	1008.56	1160.86	1266.02	972.116	1038.36	1706.74	1406.18
Ubap2	Ubiquitin-associated protein 2	A2AMY5_MOUSE;UBAP2_MOUSE		284.117	275.355	235.526	230.758	226.211	224.057	234.387	213.034	198.73	212.313	219.559	206.453	243.295	222.037	316.996	303.592
Ubr4	Isoform 3 of E3 ubiquitin-protein ligase UBR4	UBR4_MOUSE		3489.94	3424.7	2608.33	2590.7	3772.34	3733.16	3257.21	3248.78	3567.57	3606.45	2996.89	2998.52	3569.11	3649.74	3335.3	3363.85
Ubr4	Isoform 5 of E3 ubiquitin-protein ligase UBR4	UBR4_MOUSE		405.4	425.799	282.035	289.158	294.201	370.41	328.501	274.779	528.909	369.369	296.479	321.074	302.743	341.83	417.617	405.187
Uck1	Uridine-cytidine kinase	A2AN37_MOUSE		152.47	234.053	138.224	170.124	175.54	207.488	190.223	161.245	161.004	196.667	158.822	140.12	197.233	187.279	266.023	262.682
Ciz1	CDKN1A interacting zinc finger protein 1	A2AN61_MOUSE;Q8VEH2_MOUSE		99.935	122.821	108.312	102.084	110.257	125.091	97.883	91.6772	108.368	120.34	101.58	90.274	77.0751	70.1047	120.404	93.3303
Ap5s1	Adaptor-related protein 5 complex, sigma 1 subunit	A2ANC6_MOUSE		101.309	91.5993	97.0272	113.933	131.147	105.591	114.381	115.497	101.081	136.392	112.874	118.006	134.025	144.13	171.038	177.998
Tenm1	Teneurin transmembrane protein 1;Odd Oz/ten-m homolog 1 (Drosophila);Teneurin-1	A2ANL9_MOUSE;A2ANM0_MOUSE;TEN1_MOUSE		70.7886	59.7801	25.7315	17.2393	23.1016	33.9954	NaN	20.9479	14.6126	27.6949	25.9135	NaN	21.0612	9.03732	14.3643	20.0974
Fam219a	2310028H24Rik protein	A2ANP1_MOUSE		549.806	510.243	576.317	597.003	474.964	493.199	571.145	539.92	542.284	550.801	532.461	514.349	455.431	474.908	487.713	552.347
Fam219a	Family with sequence similarity 219, member A	A2ANP2_MOUSE		25.3324	52.9179	61.114	48.3234	33.5453	37.7059	42.982	26.7479	31.7276	28.6417	56.1258	34.2515	24.069	40.0733	43.8536	46.878
Anks6	Ankyrin repeat and sterile alpha motif domain containing 6;Ankyrin repeat and SAM domain-containing protein 6	A2ANT9_MOUSE;ANKS6_MOUSE		14.329	NaN	18.7891	20.6805	15.2537	27.7629	6.98718	NaN	19.6078	NaN	14.4895	NaN	NaN	42.7071	25.2661	24.4786
Syndig1	Synapse differentiation-inducing gene protein 1;Synapse differentiation inducing 1 (Fragment);Synapse differentiation inducing 1 (Fragment);Synapse differentiation inducing 1 (Fragment);Synapse differentiation inducing 1 (Fragment)	SYNG1_MOUSE;B1AYD3_MOUSE;B1AYD4_MOUSE;B1AYD5_MOUSE;B1AYD6_MOUSE		194.498	158.285	134.969	140.935	120.116	157.031	141.221	92.2207	97.8438	139.097	84.5844	103.917	85.0403	NaN	103.185	104.896
Mdn1	Midasin	A2ANY6_MOUSE;J3QMC5_MOUSE		797.183	541.598	544.513	560.876	431.913	364.615	484.398	541.384	788.54	525.355	462.105	418.871	259.322	426.694	400.513	441.6
Plch2	Isoform 4 of 1-phosphatidylinositol 4,5-bisphosphate phosphodiesterase eta-2	PLCH2_MOUSE		143.36	115.026	134.346	104.917	41.7458	80.1321	20.7855	53.4924	84.7973	74.7251	73.0729	62.6059	82.4804	84.9994	227.951	219.835
Ndufb6	NADH dehydrogenase [ubiquinone] 1 beta subcomplex subunit 6	A2AP31_MOUSE;A2AP32_MOUSE;NDUB6_MOUSE		188.248	183.97	129.506	136.86	98.2844	104.082	NaN	NaN	NaN	NaN	NaN	NaN	172.715	229.678	165.631	186.177
Cd99l2	CD99 antigen-like protein 2;CD99 antigen-like protein 2;Isoform 2 of CD99 antigen-like protein 2	A2AP74_MOUSE;C99L2_MOUSE;C99L2_MOUSE		397.692	384.778	351.94	357.754	260.169	270.068	299.12	291.645	337.564	290.612	313.645	285.601	344.739	382.165	430.042	430.862
Taf9b	TATA-box binding protein associated factor 9B;Transcription initiation factor TFIID subunit 9B	A2AP82_MOUSE;TAF9B_MOUSE		100.46	108.675	85.1565	90.9825	80.8612	74.5751	84.1437	74.2889	80.8907	77.5308	79.7365	72.7641	87.5848	79.3713	76.8433	107.54
Lrp1b	Low density lipoprotein-related protein 1B;Low-density lipoprotein receptor-related protein 1B	A2API5_MOUSE;LRP1B_MOUSE		334.947	326.972	316.071	301.12	339.445	344.155	316.048	291.611	289.518	273.082	299.545	295.512	332.108	337.91	386.365	390.809
Cd44	CD44 antigen;CD44 antigen;CD44 antigen;CD44 antigen;CD44 antigen;CD44 antigen;CD44 antigen;Isoform 8 of CD44 antigen;Isoform 9 of CD44 antigen;Isoform 13 of CD44 antigen;Isoform 12 of CD44 antigen;Isoform 4 of CD44 antigen;Isoform 6 of CD44 antigen;Isoform 7 of CD44 antigen;Isoform 2 of CD44 antigen;Isoform 3 of CD44 antigen;Isoform 5 of CD44 antigen;CD44 antigen;CD44 antigen;CD44 antigen;CD44 an…	A2APM1_MOUSE;A2APM2_MOUSE;A2APM3_MOUSE;A2APM4_MOUSE;A2APM5_MOUSE;E9QKM8_MOUSE;CD44_MOUSE;CD44_MOUSE;CD44_MOUSE;CD44_MOUSE;CD44_MOUSE;CD44_MOUSE;CD44_MOUSE;CD44_MOUSE;CD44_MOUSE;CD44_MOUSE;CD44_MOUSE;Q3U468_MOUSE;Q3U8S1_MOUSE;Q3UNN2_MOUSE;Q80X37_MOUSE		79.5077	65.7293	62.2714	74.3581	52.2063	38.579	54.0404	66.1286	76.3318	57.4986	76.4223	67.1569	91.6946	113.535	103.302	114.206
Klhdc7a	Kelch domain-containing protein 7A;Kelch domain-containing protein 7A (Fragment)	KLD7A_MOUSE;Q8C7K3_MOUSE		29.9547	32.6148	33.5509	28.702	22.8106	32.1124	20.9699	23.1007	31.8173	29.337	19.5868	29.331	14.5716	15.7339	37.0917	37.5868
Scn1a	Sodium channel protein type 1 subunit alpha;Isoform 2 of Sodium channel protein type 1 subunit alpha;Isoform 3 of Sodium channel protein type 1 subunit alpha	SCN1A_MOUSE		896.812	923.526	697.988	749.218	875.099	999.411	898.149	834.579	978.728	961.495	959.953	882.921	958.943	857.733	732.806	737.503
Esf1	ESF1, nucleolar pre-rRNA processing protein, homolog (S. cerevisiae);ESF1 homolog	A2APY6_MOUSE;ESF1_MOUSE		92.6205	70.6544	66.7456	77.1857	62.0636	65.7262	55.045	68.003	52.3075	50.095	54.6482	43.1125	37.1195	42.1614	52.1249	65.006
Ndufaf5	Arginine-hydroxylase NDUFAF5, mitochondrial	NDUF5_MOUSE		251.423	237.324	243.324	243.963	190.314	195.511	188.953	196.596	257.945	217.439	281.338	296.273	249.362	225.964	232.391	245.26
Tubb1	Tubulin beta-1 chain	TBB1_MOUSE		61268.3	62328	55748.9	59347.6	75818.8	73129.2	64032.3	65146.6	61462.9	55574.8	66682.1	62029.8	68194.4	61131.3	58076.3	53143.1
Rtf1	RNA polymerase-associated protein RTF1 homolog	RTF1_MOUSE		283.901	242.755	215.482	222.993	337.561	355.127	310.082	296.661	284.65	318.059	307.021	293.942	304.232	316.991	207.687	222.029
Skt;Etl4	Sickle tail protein;Enhancer trap locus 4	SKT_MOUSE;E9QAU4_MOUSE		219.841	203.897	146.249	150.308	213.288	195.694	168.427	175.008	118.561	122.092	99.175	99.2904	115.879	110.527	108.527	100.92
Tmem62	Transmembrane protein 62	A2AQ56_MOUSE;TMM62_MOUSE		55.1445	52.6463	41.4746	47.9467	18.2039	30.9857	40.7259	40.7048	72.9373	66.9116	43.9034	47.5116	54.6357	41.7134	59.7578	67.5278
Shf	Src homology 2 domain containing F (Fragment)	A2AQ87_MOUSE		126.469	139.197	107.449	119.713	151.191	147.684	137.71	121.886	132.166	128.497	128.877	149.436	120.737	111.167	121.586	124.543
Aqr	RNA helicase aquarius	A2AQA7_MOUSE;AQR_MOUSE		40.1058	33.6527	27.4884	30.3738	41.1366	34.1186	32.1544	28.1286	33.4492	35.7502	28.6269	29.7015	34.889	30.722	30.8157	33.4487
Atp9a	Phospholipid-transporting ATPase;Phospholipid-transporting ATPase (Fragment)	A2AQC3_MOUSE;Q6DI68_MOUSE		485.89	454.513	374.021	369.85	370.168	395.523	371.23	361.203	381.207	341.403	334.742	361.302	409.816	401.748	363.541	409.698
Secisbp2l	SECIS binding protein 2-like;Selenocysteine insertion sequence-binding protein 2-like	A2AQE2_MOUSE;SBP2L_MOUSE		134.057	177.606	105.868	89.054	99.6115	97.8889	84.302	92.4587	99.0179	110.419	74.4706	66.5914	83.768	70.1868	104.425	100.225
Atf2;Atf2;Atf2;Atf2;Atf2;Atf2;Atf2;Atf2;;Atf2;Atf2	Activating transcription factor 2 (Fragment);Activating transcription factor 2 (Fragment);Cyclic AMP-dependent transcription factor ATF-2;Cyclic AMP-dependent transcription factor ATF-2;Isoform 2 of Cyclic AMP-dependent transcription factor ATF-2;Cyclic AMP-dependent transcription factor ATF-2;C2H2-type domain-containing protein (Fragment);Atf2 protein;C2H2-type domain-containing protein;Cyclic A…	A2AQE9_MOUSE;A2AQF0_MOUSE;G3UXC3_MOUSE;ATF2_MOUSE;ATF2_MOUSE;Q3UKS5_MOUSE;Q3US39_MOUSE;Q640L6_MOUSE;Q8BN75_MOUSE;Q8CBR9_MOUSE;Q8CGB4_MOUSE		25.6486	28.6939	30.4903	34.974	35.345	49.9443	37.0283	48.6851	39.0359	55.5595	37.9366	43.9614	45.8616	64.1152	38.5095	42.9809
Tmem87a	Transmembrane protein 87A;Transmembrane protein 87A;Transmembrane protein 87A;Isoform 2 of Transmembrane protein 87A	A2AQJ5_MOUSE;A2AQJ6_MOUSE;TM87A_MOUSE;TM87A_MOUSE		188.184	202.882	242.914	229.593	193.787	195.381	196.987	199.019	145.958	147.397	130.466	114.226	176.88	181.059	219.01	214.664
Hnmt	Histamine N-methyltransferase	A2AQK4_MOUSE;HNMT_MOUSE		490.256	448.071	511.009	450.649	628.774	511.718	723.606	630.741	639.302	547.164	676.098	644.281	630.078	627.687	244.704	303.08
Stk39	non-specific serine/threonine protein kinase;STE20/SPS1-related proline-alanine-rich protein kinase	A2AQL0_MOUSE;STK39_MOUSE		2483.54	2602.68	2365.53	2383.39	2672.91	2593.18	2314.93	2290.58	2231.89	2201.74	2309.16	2241.65	2447.68	2421.76	2229.17	2250.43
Acss2	Propionate--CoA ligase;Propionate--CoA ligase;Acetyl-coenzyme A synthetase, cytoplasmic	A2AQN4_MOUSE;Q8N9U3_MOUSE;ACSA_MOUSE		776.946	779.8	853.982	846.274	824.277	780.634	798.431	830.755	805.38	787.562	789.996	800.93	762.491	750.605	799.396	843.344
Gpd2	Glycerol-3-phosphate dehydrogenase;Glycerol-3-phosphate dehydrogenase, mitochondrial	A2AQR0_MOUSE;GPDM_MOUSE		684.523	638.149	538.335	557.405	393.353	359.421	323.685	313.329	216.234	201.007	218.819	222.366	703.07	655.076	591.482	558.739
Mmadhc	Methylmalonic aciduria (cobalamin deficiency) cblD type, with homocystinuria (Fragment);Methylmalonic aciduria (cobalamin deficiency) cblD type, with homocystinuria (Fragment);Cobalamin trafficking protein CblD	A2AQT7_MOUSE;A2AQT8_MOUSE;MMAD_MOUSE		85.4734	87.6024	95.3692	84.9168	71.6064	65.1096	75.3887	76.9277	80.7656	63.4991	70.7831	76.2291	97.9607	97.2996	117.048	71.3566
Srxn1	sulfiredoxin;Sulfiredoxin-1	A2AQU8_MOUSE;SRXN1_MOUSE		81.7735	105.647	131.639	123.705	140.137	103.749	144.609	126.879	119.907	127.66	127.838	115.646	113.68	146.043	101.031	91.4078
Map3k15	Mitogen-activated protein kinase kinase kinase 15	M3K15_MOUSE		91.4703	74.9222	69.9094	72.26	73.6329	68.0757	102.728	69.1168	53.1851	73.2841	50.4867	81.6856	63.6352	62.2831	45.0401	61.0876
Fmnl2	Formin-like 2	A2AQW2_MOUSE		604.067	496.793	447.392	481.145	587.534	610.8	516.919	535.576	540.311	568.56	494.937	502.089	545.549	531.659	591.954	527.849
Kyat1	Kynurenine aminotransferase 1;Ccbl1 protein;Kynurenine--oxoglutarate transaminase 1	A2AQY8_MOUSE;Q05CI8_MOUSE;KAT1_MOUSE		144.606	191.537	117.945	145.207	87.4698	125.873	106.084	105.132	171.431	152.188	120.372	120.492	103.33	90.0934	140.243	134.287
Ppig	Peptidyl-prolyl cis-trans isomerase (Fragment);Peptidyl-prolyl cis-trans isomerase G;peptidylprolyl isomerase;peptidylprolyl isomerase (Fragment);peptidylprolyl isomerase (Fragment);Peptidyl-prolyl cis-trans isomerase (Fragment)	A2AR01_MOUSE;PPIG_MOUSE;B2RWT5_MOUSE;Q05CC5_MOUSE;Q05DE4_MOUSE;Q80VC1_MOUSE		NaN	67.2186	63.5186	47.1007	39.665	86.7296	35.9906	69.1418	41.5371	44.5286	45.0967	46.1813	66.5146	83.4807	63.6651	83.9939
Frmd5	FERM domain containing 5;FERM domain containing 5 (Fragment);FERM domain containing 5 (Fragment);FERM domain containing 5;FERM domain-containing protein 5;FERM domain-containing protein (Fragment)	A2AR56_MOUSE;B0R0D4_MOUSE;B0R0D5_MOUSE;F2Z484_MOUSE;FRMD5_MOUSE;Q8BW31_MOUSE		75.4813	63.2183	33.8972	41.4544	48.9707	25.2608	31.1752	42.0807	46.0271	NaN	NaN	55.2141	37.9755	48.7682	53.0429	47.9612
Tank	TRAF family member-associated Nf-kappa B activator;TRAF family member-associated Nf-kappa B activator;TRAF family member-associated NF-kappa-B activator;Isoform 2 of TRAF family member-associated NF-kappa-B activator;Isoform 4 of TRAF family member-associated NF-kappa-B activator;UBZ1-type domain-containing protein;UBZ1-type domain-containing protein;TRAF family member-associated Nf-kappa B activ…	A2AR76_MOUSE;A2AR78_MOUSE;TANK_MOUSE;TANK_MOUSE;TANK_MOUSE;Q3TNB4_MOUSE;Q3UGW0_MOUSE;Q8C2D3_MOUSE;Q8R383_MOUSE		250.619	NaN	176.333	257.32	284.691	351.881	253.131	231.89	169.725	155.592	151.202	164.965	213.675	171.14	169.149	158.419
Ak4	Adenylate kinase 4 (Fragment);Adenylate kinase 4 (Fragment);Adenylate kinase 4, mitochondrial;Adenylate kinase active site lid domain-containing protein (Fragment);Adenylate kinase 4, mitochondrial	A2ARF5_MOUSE;A2ARF6_MOUSE;Q3U489_MOUSE;Q3UYL0_MOUSE;KAD4_MOUSE		242.655	NaN	71.74	68.163	83.6062	79.8979	55.9801	49.7702	84.4432	102.411	70.95	108.132	74.7334	64.3739	68.4247	73.5623
Ppip5k1	Inositol hexakisphosphate and diphosphoinositol-pentakisphosphate kinase 1	VIP1_MOUSE		2134.88	2226.05	2245.23	2186.55	1989.63	2162.25	2184.19	2158.23	2263.75	2269.31	2219	2214.22	2000.73	2021.11	2171.68	2131.1
Ppip5k1	Isoform 3 of Inositol hexakisphosphate and diphosphoinositol-pentakisphosphate kinase 1	VIP1_MOUSE		526.506	337.574	431.922	385.013	315.93	306.654	327.367	353.826	432.253	354.958	359.25	277.948	320.652	346.778	443.861	427.564
Map1a	Microtubule-associated protein 1 A	A2ARP8_MOUSE		21447.6	21833.5	12070.3	12273.7	25179.8	25209.7	18857	19153	22890.5	22591.7	14716	14544.6	25833.2	25604	16995.2	17300.1
Ankrd63	Ankyrin repeat domain-containing protein 63	ANR63_MOUSE		1463.79	1450.54	1255.85	1353.43	627.472	525.391	545.507	586.255	588.645	518.588	570.734	473.941	1669.49	1605.19	1057.67	1000.08
Gm6710	Predicted gene 14391	A2ART0_MOUSE		NaN	34.2298	16.28	27.4569	NaN	NaN	NaN	19.1815	19.3052	29.3624	NaN	NaN	NaN	NaN	24.4641	36.3699
Gm14443	Predicted gene 14443	A2ARX0_MOUSE		NaN	174.618	309.619	274.193	263.348	211.377	390.3	358.316	116.342	118.85	353.028	267.178	273.895	300.003	678.457	396.473
Ankrd16	Ankyrin repeat domain-containing protein 16	ANR16_MOUSE		64.2125	64.8195	57.8663	40.1609	56.8219	33.6776	72.378	73.1876	60.5774	43.5578	51.8378	34.9064	64.8277	48.7166	33.9158	43.801
Zfp385b;Zfp385b;Znf385b;Znf385b	Zinc finger protein 385B;Zinc finger protein 385B;Zinc finger protein 385B;Isoform 2 of Zinc finger protein 385B	A2AS57_MOUSE;G5E8Y8_MOUSE;Z385B_MOUSE;Z385B_MOUSE		84.5181	102.449	81.625	81.1971	66.2082	65.4826	48.7745	52.9896	68.9835	61.4774	53.9768	63.5575	68.1604	62.1376	79.0965	86.3032
Rapgef4	Rapgef4 protein;Rap guanine nucleotide exchange factor (GEF) 4;MKIAA4040 protein (Fragment);Rap guanine nucleotide exchange factor 4;Isoform 3 of Rap guanine nucleotide exchange factor 4	A2ASW4_MOUSE;A2ASW8_MOUSE;Q571A8_MOUSE;RPGF4_MOUSE;RPGF4_MOUSE		56.4241	70.3139	63.7168	60.9207	72.2179	69.3757	64.4371	62.5176	55.1669	61.392	55.697	55.2393	57.2296	58.7032	65.7483	68.4543
Grb14	Growth factor receptor bound protein 14;Growth factor receptor-bound protein 14	A2ASX2_MOUSE;GRB14_MOUSE		541.491	525.326	525.98	535.076	515.039	543.055	538.861	579.071	426.714	418.076	463.786	489.731	533.33	541.542	479.742	455.262
Slc25a25	Mitochondrial adenyl nucleotide antiporter SLC25A25;Isoform 2 of Mitochondrial adenyl nucleotide antiporter SLC25A25;Isoform 3 of Mitochondrial adenyl nucleotide antiporter SLC25A25;Isoform 4 of Mitochondrial adenyl nucleotide antiporter SLC25A25;Isoform 5 of Mitochondrial adenyl nucleotide antiporter SLC25A25	SCMC2_MOUSE		71.103	54.6332	40.8188	44.8385	NaN	17.3048	12.6669	36.0799	27.5134	18.8244	19.9309	32.5338	31.4097	31.3595	59.2931	55.5386
Upf2	Regulator of nonsense transcripts 2	RENT2_MOUSE		357.767	366.198	313.85	340.217	384.816	406.496	341.108	360.263	328.805	335.349	342.478	345.106	308.428	348.874	347.273	358.711
Gorasp2	Golgi reassembly stacking protein 2;PDZ GRASP-type domain-containing protein;PDZ GRASP-type domain-containing protein;Golgi reassembly-stacking protein 2;Isoform 2 of Golgi reassembly-stacking protein 2	A2ATI9_MOUSE;Q3TG07_MOUSE;Q3TX06_MOUSE;GORS2_MOUSE;GORS2_MOUSE		336.293	318.856	302.753	327.96	334.628	291.133	277.954	272.174	364.228	365.207	334.843	302.767	327.372	304.12	424.418	430.661
Fam171a1	Family with sequence similarity 171, member A1	A2ATK9_MOUSE		66.3308	58.0073	37.2045	52.1439	24.861	28.6066	24.0307	19.8183	33.9217	28.2231	43.1204	27.6616	31.7179	43.2691	39.1541	40.1817
Nek6	NEK6-subfamily protein kinase;Serine/threonine-protein kinase Nek6	A2ATN9_MOUSE;NEK6_MOUSE		120.91	128.326	96.759	109.546	135.12	105.88	115.321	118.023	83.051	95.2249	84.5232	89.1593	100.659	117.81	91.6566	72.8706
Myef2	Myelin basic protein expression factor 2, repressor;Myelin basic protein expression factor 2, repressor;Myelin expression factor 2;Isoform 2 of Myelin expression factor 2	A2ATP5_MOUSE;A2ATP6_MOUSE;MYEF2_MOUSE;MYEF2_MOUSE		353.706	380.986	252.032	253.457	338.944	342.191	284.789	282.08	228.19	248.339	216.132	244.076	379.64	406.061	258.368	251.342
Rtn4rl2	Reticulon 4 receptor-like 2 (Fragment);Reticulon-4 receptor-like 2	A2ATS6_MOUSE;R4RL2_MOUSE		148.016	145.914	117.477	107.943	97.5456	125.105	86.8797	118.937	147.201	131.756	125.47	115.094	85.4706	132.361	103.681	110.463
Dhtkd1	2-oxoadipate dehydrogenase complex component E1	DHTK1_MOUSE		NaN	NaN	NaN	NaN	NaN	NaN	50.4519	NaN	42.1001	41.3088	44.1737	81.5566	NaN	37.9222	41.5664	41.3828
Cacnb4	Calcium channel, voltage-dependent, beta 4 subunit;Calcium channel, voltage-dependent, beta 4 subunit;SH3 domain-containing protein (Fragment);Voltage-dependent L-type calcium channel subunit beta-4;Isoform 1 of Voltage-dependent L-type calcium channel subunit beta-4;Isoform 2 of Voltage-dependent L-type calcium channel subunit beta-4	A2ATZ8_MOUSE;J3QK20_MOUSE;Q3TYI5_MOUSE;CACB4_MOUSE;CACB4_MOUSE;CACB4_MOUSE		222.555	178.148	142.243	142.506	129.631	141.011	114.761	137.699	130.668	141.14	105.881	93.0579	135.008	153.879	147.336	131.288
Rad21l1;Rad21l	Double-strand-break repair protein rad21-like protein 1;RAD21-like (S. pombe)	RD21L_MOUSE;R4GML2_MOUSE		39.9174	60.3637	47.1599	35.599	89.0244	111.374	53.8833	45.0488	32.816	39.5404	35.3562	29.2037	38.4379	55.0557	34.5037	NaN
Klhl41	Kelch-like protein 41	KLH41_MOUSE		17.6831	NaN	23.4759	19.3588	NaN	22.9608	46.1904	43.946	31.7702	44.9917	17.1537	47.5856	20.8997	46.2567	34.7579	31.5074
Tpd52l2	Tumor protein D52-like 2	A2AUD5_MOUSE		824.736	868.327	799.348	753.049	665.084	749.411	737.26	759.411	960.628	964.977	978.209	951.354	935.516	1018.84	963.362	939.692
Thnsl1	Threonine synthase-like 1 (bacterial) (Fragment)	A2AUG6_MOUSE		NaN	NaN	78.2808	105.994	87.4431	99.1784	115.99	98.9605	80.8949	89.3639	157.932	145.473	86.5774	110.223	19.9785	19.8379
Epb41l1	Erythrocyte membrane protein band 4.1 like 1	A2AUK8_MOUSE		NaN	NaN	NaN	17.0547	56.2581	NaN	33.933	36.9294	65.958	64.3186	44.6099	48.5499	54.1448	59.3322	48.1614	46.637
Eif2ak4	non-specific serine/threonine protein kinase;non-specific serine/threonine protein kinase;eIF-2-alpha kinase GCN2;Isoform 3 of eIF-2-alpha kinase GCN2	A2AUM0_MOUSE;A2AUM1_MOUSE;E2AK4_MOUSE;E2AK4_MOUSE		80.1212	75.4827	61.4754	63.9417	69.1308	57.1871	56.866	53.6695	59.0691	58.7351	55.583	55.6829	65.5917	72.6927	77.9739	70.2974
Pfkfb3	6-phosphofructo-2-kinase/fructose-2,6-biphosphatase 3;6-phosphofructo-2-kinase/fructose-2,6-biphosphatase 3;6-phosphofructo-2-kinase/fructose-2,6-biphosphatase 3;6-phosphofructo-2-kinase/fructose-2, 6-biphosphatase 3 splice variant 3;6-phosphofructo-2-kinase/fructose-2, 6-biphosphatase 3 splice variant 1;6-phosphofructo-2-kinase/fructose-2, 6-biphosphatase 3 splice variant 2;6-phosphofructo-2-kin…	A2AUP1_MOUSE;A2AUP3_MOUSE;A2AUP4_MOUSE;A2AUP5_MOUSE;A7UAK4_MOUSE;A7UAK5_MOUSE;A7UAK8_MOUSE;Q3U3S6_MOUSE;Q7TS91_MOUSE;Q9ESY2_MOUSE		144.933	156.593	157.689	165.023	160.525	157.724	149.082	130.817	137.742	115.809	121.014	122.506	120.979	155.34	139.073	167.428
Garnl3	GTPase activating RANGAP domain-like 3 (Fragment)	A2AUQ6_MOUSE		NaN	98.1408	189.568	158.068	198.922	NaN	128.771	143.446	72.4616	NaN	73.5738	NaN	138.183	137.913	138.624	NaN
Dab2ip	Disabled 2 interacting protein;Disabled homolog 2-interacting protein	A2AUX3_MOUSE;DAB2P_MOUSE		514.196	507.202	527.95	505.604	547.725	541.537	504.034	545.085	352.489	351.095	365.859	376.55	398.839	408.134	414.217	409.333
Rrbp1	Ribosome binding protein 1;Ribosome-binding protein 1	A2AVJ7_MOUSE;RRBP1_MOUSE		73.1343	52.349	53.0846	59.2487	60.6447	64.6707	56.0075	53.6475	61.0297	60.5163	70.6228	58.8422	90.6183	97.9294	62.1641	58.2468
Ssrp1	FACT complex subunit SSRP1 (Fragment);FACT complex subunit SSRP1 (Fragment);FACT complex subunit SSRP1;Isoform 2 of FACT complex subunit SSRP1	A2AW05_MOUSE;Q05DR5_MOUSE;SSRP1_MOUSE;SSRP1_MOUSE		140.419	154.247	130.11	135.414	137.921	133.636	114.024	126.918	114.568	106.866	125.668	126.568	128.084	128.585	114.894	119.144
Ttbk2	Tau tubulin kinase 2;Tau-tubulin kinase 2	A2AW15_MOUSE;TTBK2_MOUSE		322.118	322.715	232.194	227.816	239.382	285.06	204.502	220.85	172.97	204.715	172.293	166.628	227.656	218.306	232.279	220.687
Rabgap1	Rab GTPase-activating protein 1;RAB GTPase activating protein 1	RBGP1_MOUSE;B2RRC5_MOUSE		4860.86	5107.81	4656.72	4583.54	5055.89	5088.98	5164.88	4996.81	4781.8	4839.28	5080.8	4956.47	4884.81	4849.3	4961.13	5089.43
Ptprj	protein-tyrosine-phosphatase;protein-tyrosine-phosphatase;protein-tyrosine-phosphatase;Receptor-type tyrosine-protein phosphatase eta	A2AWF8_MOUSE;A2AWF9_MOUSE;E9Q4S7_MOUSE;PTPRJ_MOUSE		199.588	186.195	205.449	198.188	175.526	192.311	158.897	158.249	141.704	159.588	169.051	160.518	154.135	188.243	178.387	172.787
Sh3glb2	Endophilin-B2	A2AWI7_MOUSE		3353.97	4130.22	3724.84	3864.33	3989.39	3744.45	4095.79	3769.72	4266.34	4257.54	3368.05	3344.62	3925.35	3419.26	3554.12	4525.84
Sh3glb2	Endophilin-B2	A2AWI9_MOUSE		549.043	383.853	474.358	499.15	711.565	660.779	369.64	519.982	602.326	599.012	517.919	499.57	481.393	558.641	104.264	141
Dolpp1	Dolichyldiphosphatase;Dolichyldiphosphatase 1	A2AWJ3_MOUSE;DOPP1_MOUSE		31.1382	57.1165	52.7378	43.8484	23.962	26.2418	18.6956	31.8571	53.4298	47.4281	55.7998	31.9602	62.3839	48.7727	74.4739	58.4585
Ythdf1	YTH domain-containing family protein;YTH domain-containing family protein 1	A2AWN8_MOUSE;YTHD1_MOUSE		268.129	252.732	224.438	226.638	225.223	232.084	211.315	211.846	196.286	206.77	194.665	164.805	211.813	207.366	300.815	259.092
Arhgef10l	Rho guanine nucleotide exchange factor 10-like protein;Isoform 2 of Rho guanine nucleotide exchange factor 10-like protein;Isoform 3 of Rho guanine nucleotide exchange factor 10-like protein;Isoform 4 of Rho guanine nucleotide exchange factor 10-like protein	ARGAL_MOUSE		451.001	399.052	397.438	400.153	480.434	526.389	467.767	469.658	412.665	425.802	444.843	465.453	437.035	453.428	402.112	414.93
Atxn7l3	Ataxin-7-like protein 3;Isoform 2 of Ataxin-7-like protein 3;Ataxin 7-like 3 (Fragment);Ataxin 7-like 3 (Fragment)	AT7L3_MOUSE;AT7L3_MOUSE;F6RCN9_MOUSE;Z4YN62_MOUSE		NaN	78.6819	43.0226	NaN	NaN	63.7609	NaN	75.359	NaN	NaN	NaN	52.2363	37.6661	84.8551	26.4785	56.2603
Ubtf	Upstream binding transcription factor, RNA polymerase I;Upstream binding transcription factor, RNA polymerase I;Upstream binding transcription factor, RNA polymerase I;Nucleolar transcription factor 1;Isoform UBF2 of Nucleolar transcription factor 1;HMG box domain-containing protein	A2AWT5_MOUSE;A2AWT6_MOUSE;A2AWT7_MOUSE;UBF1_MOUSE;UBF1_MOUSE;Q9DBH1_MOUSE		182.182	141.665	73.4021	96.0237	84.5145	87.2083	93.2515	77.5182	123.046	134.665	115.385	97.2104	124.168	110.958	130.905	101.508
1810030O07Rik;	Uncharacterized protein;Uncharacterized protein CXorf38 homolog	A2BDN9_MOUSE;CX038_MOUSE		114.729	106.543	111.025	103.95	99.5818	101.61	94.2595	107.757	98.9026	94.5931	101.615	111.217	106.461	104.799	144.72	135.605
Epha7	receptor protein-tyrosine kinase;Ephrin type-A receptor 7;Isoform 2 of Ephrin type-A receptor 7;Isoform 3 of Ephrin type-A receptor 7;receptor protein-tyrosine kinase	A2BDQ4_MOUSE;EPHA7_MOUSE;EPHA7_MOUSE;EPHA7_MOUSE;Q8R381_MOUSE		498.048	471.568	481.029	483.596	502.832	525.636	433.61	448.338	389.112	351.529	475.804	430.918	433.675	535.116	569.746	509.664
Mocs3	Adenylyltransferase and sulfurtransferase MOCS3	MOCS3_MOUSE		719.509	674.484	709.129	706.92	611.64	653.045	666.141	672.271	875.769	851.573	903.962	920.083	806.436	759.355	879.67	948.64
Las1l	Ribosomal biogenesis protein LAS1L;Isoform 2 of Ribosomal biogenesis protein LAS1L	LAS1L_MOUSE		175.162	175.61	113.96	99.3121	137.536	128.862	131.764	126.212	110.178	94.1819	84.7264	82.4451	98.8571	110.512	110.444	115.097
Dync1i2	Cytoplasmic dynein 1 intermediate chain 2	A2BFF5_MOUSE		926.942	966.595	832.352	762.012	946.344	913.272	897.645	866.998	841.795	885.586	777.108	766.099	923.58	898.024	1189.19	1045.14
Dync1i2	Cytoplasmic dynein 1 intermediate chain 2	A2BFF7_MOUSE;DC1I2_MOUSE		4518.56	4443.31	4345.24	4479.5	5511.79	5158.54	4986.52	5273.68	4201.84	4205.09	4517.88	4425.34	5423.47	5399.73	5130.81	5323.93
Nfib;Nfib;Nfib;Nfib;Nfib;Nfib;Nfib;Nfib;	Nuclear factor 1;Nuclear factor 1;Nuclear factor 1;Nuclear factor 1;Nuclear factor 1 B-type;Isoform 2 of Nuclear factor 1 B-type;Isoform 3 of Nuclear factor 1 B-type;Nuclear factor 1;Nuclear factor 1	A2BG75_MOUSE;A2BG76_MOUSE;A2BG77_MOUSE;I7HIP8_MOUSE;NFIB_MOUSE;NFIB_MOUSE;NFIB_MOUSE;Q6GSP7_MOUSE;Q8BN68_MOUSE		335.73	296.458	263.903	270.303	294.846	327.133	292.265	334.876	319.495	256.221	214.996	261.977	284.962	270.913	228.839	274.004
Arid1a	AT-rich interactive domain-containing protein 1A;AT rich interactive domain 1A (SWI-like)	ARI1A_MOUSE;E9QAQ7_MOUSE		532.817	525.309	514.124	489.591	480.065	477.263	506.915	513.942	467.374	475.968	454.252	452.825	553.765	559.831	662.713	603.88
Lmo2	Rhombotin-2 (Fragment);Rhombotin-2;Rhombotin-2;Rhombotin-2;Rhombotin-2	A2BHP2_MOUSE;A2BHP3_MOUSE;A2BHP5_MOUSE;RBTN2_MOUSE;Q544Z2_MOUSE		45.9935	38.3919	26.5424	17.8299	NaN	14.5471	NaN	23.6911	NaN	NaN	NaN	26.5617	21.4051	NaN	NaN	NaN
Psip1	PC4 and SFRS1-interacting protein;PC4 and SFRS1-interacting protein (Fragment);PC4 and SFRS1-interacting protein;Isoform 2 of PC4 and SFRS1-interacting protein	A2BI12_MOUSE;Q05CD2_MOUSE;PSIP1_MOUSE;PSIP1_MOUSE		175.321	155.618	123.885	108.369	156.688	148.584	115.016	97.4983	167.614	160.512	133.271	123.119	149.883	144.77	158.827	178.675
Rps6ka6	Ribosomal protein S6 kinase;Ribosomal protein S6 kinase;Ribosomal protein S6 kinase;Ribosomal protein S6 kinase;Ribosomal protein S6 kinase;Ribosomal protein S6 kinase alpha-6;Isoform 2 of Ribosomal protein S6 kinase alpha-6;Isoform 3 of Ribosomal protein S6 kinase alpha-6	A2CEE5_MOUSE;A2CEE6_MOUSE;A2CEE7_MOUSE;B1B0X3_MOUSE;E9PUP0_MOUSE;KS6A6_MOUSE;KS6A6_MOUSE;KS6A6_MOUSE		70.3936	64.6626	63.2507	66.0705	68.6681	78.2994	48.7218	57.4416	41.3923	57.4195	47.389	48.3739	50.3574	52.2184	75.6224	58.0474
Pgm1	Phosphoglucomutase 1;Phosphoglucomutase-1;Phosphoglucomutase-1;Phosphoglucomutase-1 (Fragment);Phosphoglucomutase-1 (Fragment);Phosphoglucomutase-1	A2CEK3_MOUSE;Q3U6X6_MOUSE;Q5RJV4_MOUSE;Q66JR7_MOUSE;Q7TNU0_MOUSE;PGM1_MOUSE		158.423	137.832	54.5933	75.2531	43.7883	75.6741	NaN	84.5912	104.435	107.382	68.1953	85.3619	87.2738	51.19	54.3298	86.264
Alox12	Arachidonate 12-lipoxygenase;Polyunsaturated fatty acid lipoxygenase ALOX12;Uncharacterized protein;Uncharacterized protein;Arachidonate 12-lipoxygenase	A2CF85_MOUSE;LOX12_MOUSE;Q3T9I9_MOUSE;Q3T9Y3_MOUSE;Q8C587_MOUSE		83.3881	66.033	49.1774	48.9327	42.8414	61.6805	44.4376	47.4827	80.7093	81.6102	50.3622	49.3669	73.6496	78.077	91.3573	81.7188
Prrt1	Proline-rich transmembrane protein 1	A2CG20_MOUSE;PRRT1_MOUSE		115.336	122.941	120.146	54.0134	112.818	87.2383	81.276	103.99	112.356	128.356	118.803	122.945	111.225	117.421	143.679	129.086
Kalrn	Kalirin	KALRN_MOUSE		179.816	168.043	148.537	158.674	187.983	200.578	178.934	181.902	149.704	143.152	152.708	147.696	136.017	151.088	129.006	135.454
Kalrn	Isoform 10 of Kalirin;Isoform 5 of Kalirin	KALRN_MOUSE		181.54	NaN	198.818	139.693	178.385	111.603	186.638	162.576	147.212	134.228	166.979	NaN	NaN	NaN	161.54	144.633
Kalrn	Isoform 4 of Kalirin;Kalirin, RhoGEF kinase;Kalirin, RhoGEF kinase	KALRN_MOUSE;D3Z534_MOUSE;D3Z535_MOUSE		35.9715	36.4212	31.6763	37.7445	11.2954	23.0962	13.5688	30.3755	24.2019	22.2585	19.7302	26.9985	15.6643	21.4416	21.2083	20.6447
IGHVDJ;IGHVDJ;;IgVH;;Ighv1-62-3;Ighv1-72;VH186.2-D-J-C mu;VH186.2-D-J-C mu;VH186.2-D-J-C mu;Ighm;VH186.2-D-J-C mu;VH186.2-D-J-C mu;Ighm;Ighm;Ighm;VH186.2-D-J-C mu;Ighm;VH186.2-D-J-C mu;Ighm;Ighm;VH186.2-D-J-C mu;VH186.2-D-J-C mu;VH186.2-D-J-C mu;Ighm;;;;;	Immunoglobulin heavy chain variable region (Fragment);Immunoglobulin heavy chain variable region (Fragment);A6 anti-[4-hydroxy-3-nitrophenyl(Phenolate form)] acetyl mAb V-H region (Fragment);I (Fragment);Ig heavy chain V region 186-1;Ig heavy chain V region 1-62-3;Ig heavy chain V region 1-72;VH186.2-D-J-C mu protein (Fragment);VH186.2-D-J-C mu protein (Fragment);VH186.2-D-J-C mu protein (Fragmen…	A2KTK5_MOUSE;A2KTK7_MOUSE;A2MXS7_MOUSE;I0ITL1_MOUSE;HVM09_MOUSE;HVM10_MOUSE;HVM49_MOUSE;Q91VA2_MOUSE;Q924P5_MOUSE;Q924P7_MOUSE;Q924Q3_MOUSE;Q924Q4_MOUSE;Q924Q5_MOUSE;Q924Q6_MOUSE;Q924Q7_MOUSE;Q924Q9_MOUSE;Q924R0_MOUSE;Q924R1_MOUSE;Q924R2_MOUSE;Q924R3_MOUSE;Q924R4_MOUSE;Q924R5_MOUSE;Q924R6_MOUSE;Q924R7_MOUSE;Q924R8_MOUSE;U5JE27_MOUSE;X5J4F9_MOUSE;X5J500_MOUSE;X5J5C0_MOUSE;X5J5C3_MOUSE		NaN	70.3526	NaN	NaN	NaN	NaN	44.8592	105.218	NaN	NaN	NaN	NaN	48.1224	52.1898	65.3245	85.0624
	Immnuoglobulin kappa light chain (Fragment);Immnuoglobulin kappa light chain (Fragment);Ig kappa chain V-V region HP R16.7;Ig kappa chain V-V region HP 93G7	A2NVE9_MOUSE;A2NVF0_MOUSE;KV5AB_MOUSE;KV5AC_MOUSE		227.831	NaN	NaN	NaN	NaN	NaN	NaN	NaN	1032.14	1073.41	1239.67	881.415	690.333	731.238	795.46	859.359
Mib1	RING-type E3 ubiquitin transferase;E3 ubiquitin-protein ligase MIB1	A2RRJ6_MOUSE;MIB1_MOUSE		286.724	307.452	287.986	296.353	332.788	301.027	297.242	299.588	228.258	220.555	218.067	243.09	235.548	241.673	241.22	248.821
Slk	non-specific serine/threonine protein kinase;STE20-like serine/threonine-protein kinase;Isoform 2 of STE20-like serine/threonine-protein kinase	A2RRK3_MOUSE;SLK_MOUSE;SLK_MOUSE		687.4	654.608	596.326	594.686	596.405	629.36	575.324	538.247	560.94	566.034	545.875	540.473	693.581	654.952	654.922	659.117
Rnf166	E3 ubiquitin-protein ligase RNF166	A2RS02_MOUSE;RN166_MOUSE		61.5309	136.237	79.2524	65.1227	53.9226	60.7558	74.5353	44.9002	59.5725	49.1619	36.5028	46.5025	90.6373	50.0245	82.3119	75.8938
Coro1b	Coronin;Coronin-1B	A2RS22_MOUSE;COR1B_MOUSE		498.273	516.638	478.441	505.639	458.423	465.328	497.906	475.335	573.485	567.098	503.898	493.334	555.674	589.674	570.215	564.072
Pepd	Xaa-Pro dipeptidase	A2RS23_MOUSE;PEPD_MOUSE		3015.74	3077.85	3125.69	3102.87	3192.59	3202.87	3181.33	3173.72	1849.31	1832.42	2990.29	2852.89	2500.16	2706.56	3556.26	3224.27
Kctd6	Potassium channel tetramerisation domain containing 6;BTB/POZ domain-containing protein KCTD6	A2RS47_MOUSE;KCTD6_MOUSE		193.958	218.521	163.415	161.68	179.453	193.019	177.094	186.27	124.418	128.115	100.322	105.21	134.122	134.906	154.499	170.262
Tmed2	Transmembrane emp24 domain trafficking protein 2;Transmembrane p24 trafficking protein 2 (Fragment);GOLD domain-containing protein;Transmembrane emp24 domain-containing protein 2	A2RS53_MOUSE;F6V6T4_MOUSE;Q8C1Z9_MOUSE;TMED2_MOUSE		232.967	187.024	264.68	237.274	128.876	125.009	175.766	159.442	195.677	226.661	185.373	164.682	166.189	187.47	321.981	314.918
Crkl	V-crk sarcoma virus CT10 oncogene homolog (Avian)-like;Crk-like protein	A2RS58_MOUSE;CRKL_MOUSE		535.692	518.254	574.841	528.592	545.473	516.586	537.482	519.449	599.227	621.982	572.859	562.804	560.521	524.384	425.426	467.254
Snrnp70	U1 small nuclear ribonucleoprotein 70 kDa	A2RS68_MOUSE;RU17_MOUSE		252.339	352.733	332.118	334.912	453.365	477.415	436.5	404.834	336.325	331.1	347.722	345.589	384.591	369.507	280.669	271.817
Tmed5	Transmembrane emp24 domain-containing protein 5	A2RS96_MOUSE;Q8VCE7_MOUSE;TMED5_MOUSE		214.219	235.152	217.085	216.204	192.563	143.746	190.617	182.822	221.09	230.107	207.29	219.045	230.196	197.493	173.754	184.655
Nap1l4	Nucleosome assembly protein 1-like 4;Nap1l4 protein;Nucleosome assembly protein 1-like 4;Nucleosome assembly protein 1-like 4	A2RSB1_MOUSE;B7ZNL2_MOUSE;NP1L4_MOUSE;Q8C1W9_MOUSE		3630.96	3712.49	3386.12	3408.96	3837.33	3952.43	3645.44	3645.19	3771.06	3901.46	3238.33	3167.67	3675.55	3711.63	3596.03	3299.38
Ube2b	Ubiquitin-conjugating enzyme E2 B	A2RSE4_MOUSE;UBE2B_MOUSE		105.719	110.007	58.2456	75.3278	155.487	139.816	85.9971	95.214	82.9131	63.5815	90.5733	88.4732	96.7571	93.9139	77.7857	60.9341
Commd1	COMM domain-containing protein 1	A2RSF1_MOUSE;Q3UGT3_MOUSE;COMD1_MOUSE		161.322	155.764	130.525	132.776	155.859	151.09	156.223	150.182	180.862	153.635	174.407	151.646	156.395	198.749	216.104	194.711
Sesn3	Sestrin 3;Sestrin-3;Sestrin 3	A2RSF4_MOUSE;SESN3_MOUSE;V5QQD1_MOUSE		174.323	163.86	154.086	153.231	124.008	150.137	142.21	162.934	98.5823	121.449	146.907	133.939	123.206	134.686	150.625	173.756
Pde4d	Phosphodiesterase;3',5'-cyclic-AMP phosphodiesterase 4D	A2RSH1_MOUSE;PDE4D_MOUSE		NaN	NaN	47.2807	NaN	156.963	89.4224	237.764	191.45	75.2059	69.3387	106.605	49.3269	NaN	NaN	41.8914	NaN
Bltp3b	Bridge-like lipid transfer protein family member 3B	BLT3B_MOUSE		1164.85	1192.85	1149.91	1138.03	1190.42	1225.4	1230.63	1260.1	1094.54	1124.69	1201.35	1238.69	1102.16	1099.46	1171.15	1115.93
Reck	Reck protein;Reversion-inducing cysteine-rich protein with Kazal motifs	A2RSP9_MOUSE;RECK_MOUSE		49.541	108.596	52.4217	44.1127	55.4454	46.842	NaN	NaN	40.763	79.7693	60.3204	64.6225	44.6562	36.1205	60.0947	57.0892
Dennd5b	DENN domain-containing protein 5B	DEN5B_MOUSE		443.859	414.443	389.803	409.802	437.756	439.971	416.066	424.753	408.851	436.952	421.314	424.388	377.741	380.896	325.082	337.444
Cox4i1	Cytochrome c oxidase subunit 4;Cytochrome c oxidase subunit 4 isoform 1, mitochondrial	A2RSV8_MOUSE;COX41_MOUSE		485.647	460.971	280.973	262.217	178.912	183.082	188.873	179.19	164.38	166.488	105.844	132.628	448.878	454.213	294.892	261.444
Kansl3	KAT8 regulatory NSL complex subunit 3;Isoform 2 of KAT8 regulatory NSL complex subunit 3;Isoform 3 of KAT8 regulatory NSL complex subunit 3	KANL3_MOUSE		28.0665	16.2093	42.332	25.4238	33.5669	42.9729	49.9044	31.1419	33.5904	36.8453	29.7599	25.1254	37.1802	31.8382	45.8221	36.3863
Lass1;Cers1	LAG1 homolog, ceramide synthase 1;Ceramide synthase 1	A2RT05_MOUSE;CERS1_MOUSE		157.01	148.666	169.398	167.262	115.747	122.569	93.5148	106.725	140.714	143.32	113.833	141.219	132.669	134.262	168.487	197.416
Mars2	Methionine--tRNA ligase, mitochondrial;Methionine--tRNA ligase, mitochondrial	A2RT28_MOUSE;SYMM_MOUSE		112.832	105.57	120.677	130.431	74.2543	82.4262	74.0472	59.7336	134.24	119.394	102.225	119.141	93.3849	84.2919	108.165	114.73
Spg21	Maspardin	A2RT57_MOUSE;SPG21_MOUSE		224.698	197.356	209.647	214.309	172.738	169.24	174.395	177.499	210.905	212.576	204.141	219.973	206.068	209.609	236.327	219.95
Fbxl16	F-box/LRR-repeat protein 16;F-box and leucine-rich repeat protein 16	FXL16_MOUSE;B2RPY3_MOUSE		5661.95	6018.33	6433.27	6524.01	5703.94	5720.07	5808.68	6155.04	4991.79	4838.36	5663.99	5450.81	5927.48	6046.93	5764.65	5918.72
Dennd3	DENN domain-containing protein 3;DENN domain containing 3	DEND3_MOUSE;G3UYA1_MOUSE		102.547	NaN	53.9686	NaN	41.326	38.4452	31.7919	29.5551	81.7536	32.195	36.7056	31.9661	58.7561	45.3793	61.2744	76.0448
Rnf39	Ring finger protein 39	A2RT81_MOUSE		96.3283	110.239	108.679	113.78	138.555	153.074	147.107	136.581	142.045	131.497	135.605	151.41	69.2943	79.1562	105.152	94.5458
Zcchc14	Zinc finger, CCHC domain containing 14;Zinc finger CCHC domain-containing protein 14;Isoform 2 of Zinc finger CCHC domain-containing protein 14;Isoform 3 of Zinc finger CCHC domain-containing protein 14	A2RTC2_MOUSE;ZCH14_MOUSE;ZCH14_MOUSE;ZCH14_MOUSE		NaN	15.0077	16.238	18.1086	38.6366	22.7658	NaN	17.1685	29.8979	27.9769	17.9569	24.7158	8.71451	15.7841	NaN	29.8199
Lcmt1	Leucine carboxyl methyltransferase 1	A2RTH5_MOUSE		170.23	176.571	150.857	138.28	150.994	198.435	165.363	134.428	231.706	221.375	180.825	141.287	195.754	128.31	218.739	167.239
Lgmn	Legumain	A2RTI3_MOUSE;LGMN_MOUSE		168.829	146.405	188.074	178.873	211.396	223.908	220.528	230.847	245.205	213.882	257.792	242.415	264.575	255.237	210.216	238.113
Rsrc2	Arginine/serine-rich coiled-coil protein 2	RSRC2_MOUSE;B7ZNU2_MOUSE;S4R265_MOUSE;S4R2L4_MOUSE		90.699	115.087	81.5618	75.7804	36.9915	73.338	101.931	118.402	98.9181	100.55	79.9937	99.4463	105.727	104.839	164.056	171.036
Ube2n	E2 ubiquitin-conjugating enzyme;Ubiquitin-conjugating enzyme E2 N	A2RTT4_MOUSE;UBE2N_MOUSE		558.503	542.7	484.514	526.104	568.54	504.403	474.124	497.146	849.358	783.239	688.891	788.725	685.719	741.25	733.71	733.932
Palm3	Paralemmin-3	PALM3_MOUSE		44.9285	29.8481	38.798	32.3867	35.9051	NaN	30.6596	45.9939	43.4852	42.0081	27.7011	36.2459	38.6167	28.7282	43.4248	50.9781
Cltb	Clathrin light chain (Fragment)	A2VCP8_MOUSE		311.426	357.814	266.934	240.591	195.868	237.694	60.3151	135.217	139.899	154.166	41.4129	87.5012	109.701	71.8446	209.25	231.738
Gria3	Glutamate receptor	A2VDF5_MOUSE		112.769	121.988	104.799	87.7585	105.548	92.3164	93.4769	92.4541	112.032	120.695	115.429	118.762	120.635	116.432	133.199	143.827
Nt5c1a	Cytosolic 5'-nucleotidase 1A	5NT1A_MOUSE		524.213	524.244	545.535	574.493	599.558	628.093	598.627	618.587	598.877	573.682	668.846	644.068	670.092	711.425	715.029	773.074
Pm20d2	Xaa-Arg dipeptidase	P20D2_MOUSE		270.974	245.728	245.209	251.168	191.21	202.905	224.345	211.444	273.997	288.998	284.102	293.946	220.57	213.881	277.848	297.664
Kdm1a	Lysine-specific histone demethylase;Lysine-specific histone demethylase 1A	A3KG93_MOUSE;KDM1A_MOUSE		316.51	297.042	263.55	269.518	343.838	313.974	293.465	313.06	276.345	284.681	244.301	289.279	289.814	309.058	349.945	318.392
Tbc1d8b	TBC1 domain family member 8B	TBC8B_MOUSE		411.713	391.563	432.178	431.161	414.821	420.547	406.657	408.211	325.655	333.958	397.837	392.876	468.193	455.464	518.595	499.289
H13;Hm13	Histocompatibility 13 (Fragment);Isoform 4 of Minor histocompatibility antigen H13	A3KGR9_MOUSE;HM13_MOUSE		211.818	229.335	242.537	253.828	175.247	245.593	206.058	198.152	255.113	269.234	340.963	315.114	260.252	289.48	211.929	154.062
Sptan1	Spectrin alpha, non-erythrocytic 1	A3KGU5_MOUSE		7637.77	7747.49	5436.16	5425.82	8174.92	8091.09	6903.18	7000.95	9406.77	9307.56	7541.04	7456.6	9525.52	9498.87	7760.49	7982.86
Sptan1	Spectrin alpha, non-erythrocytic 1	A3KGU9_MOUSE		1054.89	862.902	783.408	713.208	1006.34	1020.04	991.529	962.327	1361.66	1397.9	1070.07	1052.79	1412.51	1418.14	1313.73	1240.6
Ranbp6	RAN binding protein 6;Ran-binding protein 6	A3KMD2_MOUSE;RNBP6_MOUSE		448.779	459.889	464.399	464.45	460.856	451.834	446.068	463.991	477.535	479.006	517.052	504.242	464.429	485.688	490.438	462.347
Mrtfb	Mkl2 protein (Fragment);Myocardin-related transcription factor B;MKIAA1243 protein (Fragment)	A3KMF2_MOUSE;MRTFB_MOUSE;Q5DTZ3_MOUSE		1930.9	1978.59	1984.69	2071.84	1777.48	1745.94	1835.02	1886.56	709.708	726.104	717.407	727.288	850.595	902.537	989.772	936.033
Vbp1	Vbp1 protein (Fragment);Prefoldin subunit 3	A3KMJ8_MOUSE;PFD3_MOUSE		1145.76	1008.73	1262.91	1315.31	1329.47	1380.32	1398.75	1256.88	1316.49	1314.92	1544.78	1409	1478.04	1459.33	1433.32	1276.45
Ywhaq	14-3-3 protein theta;14-3-3 protein theta;Isoform 2 of 14-3-3 protein theta	A3KML3_MOUSE;1433T_MOUSE;1433T_MOUSE		58132.4	59476.8	56748.4	56205.8	60504.8	58745.1	60065.9	60376.3	64531.3	60683.9	61646.9	58135.9	62712.1	62069.9	56093.7	58586.7
Atp6v0c	V-type proton ATPase proteolipid subunit;V-type proton ATPase proteolipid subunit (Fragment);V-type proton ATPase 16 kDa proteolipid subunit c;V-type proton ATPase proteolipid subunit (Fragment);V-type proton ATPase proteolipid subunit	A3KML5_MOUSE;E9Q9C5_MOUSE;VATL_MOUSE;Q80YP7_MOUSE;Q8C1D9_MOUSE		474.678	607.311	291.902	329.593	345.487	416.398	458.638	350.939	502.269	407.979	441.185	357.296	638.01	730.983	532.949	526.58
Ttc38	Tetratricopeptide repeat protein 38	TTC38_MOUSE		258.214	223.001	236.351	246.771	244.718	243.867	228.36	237.854	344.445	341.49	346.134	365.569	274.479	318.919	315.223	345.855
Nr3c2	Mineralocorticoid receptor	A3KN90_MOUSE;D3Z473_MOUSE		75.0082	36.0572	57.4698	46.9263	42.739	60.2244	47.9637	50.8433	57.2289	41.5769	55.1245	49.8817	57.4797	72.9025	53.0661	62.0358
Mettl4	Methyltransferase like 4;N(6)-adenine-specific methyltransferase METTL4	A4FTY8_MOUSE;METL4_MOUSE		266.969	217.8	144.085	163.259	174.462	154.171	165.056	225.952	153.369	159.651	158.832	158.475	219.426	142.658	153.51	169.657
Yod1	Ubiquitin thioesterase OTU;Ubiquitin thioesterase OTU1	A4FTZ0_MOUSE;OTU1_MOUSE		52.5375	60.2674	94.1111	95.0459	106.403	101.613	114.061	103.224	79.9391	82.3058	93.5962	100.879	100.45	93.3823	109.905	107.005
Dagla	sn-1-specific diacylglycerol lipase (Fragment);Diacylglycerol lipase-alpha	A4FU75_MOUSE;DGLA_MOUSE		79.9036	50.8312	40.3342	42.7356	52.3043	36.4997	41.5003	52.4886	40.8099	30.0604	41.8127	24.4449	61.1814	49.5023	61.7965	54.3373
Glt1d1	Glycosyltransferase 1 domain-containing protein 1	GL1D1_MOUSE		60.726	44.8644	43.1025	32.369	38.8395	51.3058	29.6971	32.0774	27.313	24.173	29.8164	NaN	22.5178	27.2081	35.1494	37.8816
Rims4	Rims4 protein (Fragment);Regulating synaptic membrane exocytosis protein 4	A4FUQ0_MOUSE;RIMS4_MOUSE		363.828	323.199	353.303	348.14	363.313	346.199	399.768	332.23	271.034	232.565	249.844	222.581	202.845	209.037	235.884	249.915
Rps16	40S ribosomal protein S16;Small ribosomal subunit protein uS9;40S ribosomal protein S16;40S ribosomal protein S16 (Fragment)	A4FUS1_MOUSE;RS16_MOUSE;Q5CZY9_MOUSE;Q641N3_MOUSE		3765.33	3954.66	2067.51	1936.75	3055.65	3114.64	2581.76	2566.47	2578.65	2496.24	1957.58	1760.3	2826.4	3074.79	1967.87	2073.69
Jmjd6	Bifunctional arginine demethylase and lysyl-hydroxylase JMJD6 (Fragment);Bifunctional arginine demethylase and lysyl-hydroxylase JMJD6;Bifunctional arginine demethylase and lysyl-hydroxylase JMJD6;Bifunctional arginine demethylase and lysyl-hydroxylase JMJD6 (Fragment);Bifunctional arginine demethylase and lysyl-hydroxylase JMJD6 (Fragment);Bifunctional arginine demethylase and lysyl-hydroxylase …	A4FUU3_MOUSE;B2WTI1_MOUSE;B2WTI2_MOUSE;F6VMC4_MOUSE;F6VRF7_MOUSE;G3UVU9_MOUSE;JMJD6_MOUSE;JMJD6_MOUSE		108.007	77.1892	64.18	39.357	NaN	91.1016	97.8642	109.634	74.8758	82.3844	90.5456	81.195	119.605	113.162	58.9615	NaN
Cadps2	Ca2+-dependent activator protein for secretion 2 isoform c	A4PI82_MOUSE		152.997	162.095	98.9619	142.976	183.878	227.994	173.678	154.052	144.335	161.442	191.772	161.236	171.524	189.813	130.575	115.628
Zeb1	Zinc finger E-box binding homeobox 1;Zinc finger E-box-binding homeobox 1	A4QPD1_MOUSE;ZEB1_MOUSE		97.2763	68.8936	58.8528	67.5824	76.975	59.7307	66.9384	72.6806	57.8177	69.6062	64.7197	48.232	68.2904	81.3472	81.9378	66.106
Rel	Reticuloendotheliosis oncogene	A4QPD3_MOUSE		266.621	282.202	285.86	265.357	237.992	253.196	248.881	230.789	210.282	228.839	203.214	227.98	223.792	238.511	232.625	248.195
Ppp1r11	E3 ubiquitin-protein ligase PPP1R11;E3 ubiquitin-protein ligase PPP1R11;E3 ubiquitin-protein ligase PPP1R11 (Fragment)	A5A4Y9_MOUSE;A5A4Z2_MOUSE;G3UZ30_MOUSE		70.1783	81.2298	93.0811	90.8558	75.3586	77.8913	87.9649	73.5548	116.88	110.393	127.34	128.565	98.7937	86.2122	118.857	110.119
Pard3	Par-3 (Partitioning defective 3) homolog (C. elegans);Pard3 protein;Par-3 family cell polarity regulator;Par-3 family cell polarity regulator (Fragment);Par-3 family cell polarity regulator;Partitioning defective 3 homolog	A5D6P2_MOUSE;B2RUK1_MOUSE;B7ZNY3_MOUSE;F6S7Z1_MOUSE;G3XA13_MOUSE;PARD3_MOUSE		85.4641	72.1423	75.956	69.6758	65.5092	78.3193	61.8734	71.2516	43.8325	52.3689	49.3156	47.1661	52.6413	51.2581	63.1031	63.1866
Abcc1	Multidrug resistance-associated protein 1	A5D6P3_MOUSE;MRP1_MOUSE		NaN	NaN	NaN	39.0963	57.6682	NaN	NaN	NaN	26.7352	45.4069	NaN	NaN	NaN	56.5206	47.248	44.3926
Glo1	Lactoylglutathione lyase	A5GZX3_MOUSE;LGUL_MOUSE		508.993	557.478	504.155	539.839	589.587	702.729	544.415	556.402	531.982	480.134	579.666	559.549	505.568	620.233	641.076	549.481
Mtr	Methionine synthase	METH_MOUSE		828.847	784.555	823.553	830.11	757.329	753.789	721.298	732.759	687.317	704.7	737.342	757.368	868.229	867.137	1020.04	1015.91
Exoc6b	Exocyst complex component 6B	EXC6B_MOUSE		416.876	403.819	293.374	294.172	398.846	403.634	296.5	280.88	335.978	350.331	265.815	275.906	425.646	437.27	320.183	351.499
Mipep	Mitochondrial intermediate peptidase	MIPEP_MOUSE		232.271	244.316	221.821	231.55	205.756	194.977	190.392	185.424	287.715	274.912	286.273	265.49	218.459	223.633	238.837	232.151
Lysmd1	LysM and putative peptidoglycan-binding domain-containing protein 1	A6H624_MOUSE;LYSM1_MOUSE		122.511	148.195	79.0552	78.9462	91.7515	112.272	80.0205	93.5455	106.964	92.8234	124.722	127.828	112.832	90.015	103.794	84.8248
Armt1	Damage-control phosphatase ARMT1	ARMT1_MOUSE		251.721	244.797	281.317	279.98	249.613	292.776	272.876	263.826	259.423	247.52	251.452	256.177	249.88	225.436	295.712	280.399
Pag1	Pag1 protein;Phosphoprotein associated with glycosphingolipid-enriched microdomains 1	A6H659_MOUSE;PHAG1_MOUSE		5.71862	8.5293	4.14293	NaN	NaN	NaN	NaN	NaN	5.07671	NaN	NaN	8.83065	NaN	11.7298	5.6563	6.2392
Bag3	BCL2-associated athanogene 3;BAG family molecular chaperone regulator 3	A6H663_MOUSE;BAG3_MOUSE		206.402	208.802	163.622	131.024	127.462	107.68	121.639	106.758	146.2	152.894	154.172	148.51	160.295	174.735	200.693	217.74
Prkcq	Protein kinase C theta type	A6H667_MOUSE;KPCT_MOUSE		150.2	129.026	125.716	102.404	125.022	82.1284	109.71	91.3901	134.189	112.189	110.387	137.229	124.146	112.879	80.8543	89.5847
Bbs4	Bardet-Biedl syndrome 4 (Human);Bardet-Biedl syndrome 4 protein homolog	A6H669_MOUSE;BBS4_MOUSE		65.3316	67.1928	56.7655	57.1028	55.9392	74.9287	59.3923	51.2608	52.6618	49.3736	57.2536	50.6415	64.7018	61.4228	67.7576	59.3158
Sac3d1	SAC3 domain-containing protein 1;SAC3 domain containing 1	SAC31_MOUSE;G5E8Q7_MOUSE		103.356	119.405	62.1673	60.6796	156.146	123.956	108.199	82.8195	41.7841	62.0989	89.299	76.379	87.8494	94.4767	85.6778	77.7585
Rabgap1l	Rab GTPase-activating protein 1-like	RBG1L_MOUSE		1729.83	1759.58	1767.55	1806.49	2197.48	2275.66	2101.09	2071.85	1945.92	1971.26	2044.69	1991.73	1885.14	1787.87	1820.78	1845.45
Rabgap1l	Isoform 2 of Rab GTPase-activating protein 1-like	RBG1L_MOUSE		69.2473	62.5075	59.5966	62.5261	56.5359	58.7995	60.3987	57.9154	56.755	68.5573	53.569	66.1356	49.6148	62.7022	81.5945	77.0036
Rabgap1l	Isoform 3 of Rab GTPase-activating protein 1-like	RBG1L_MOUSE		2108.43	2116.43	1944.92	2001.88	2035.34	2223.55	2290.66	2202.08	2081.37	1998.49	2150.62	2158.51	2100.94	2081.44	1941.69	2070.7
Mmrn2	Multimerin-2;Isoform 2 of Multimerin-2	MMRN2_MOUSE		NaN	12.5403	18.7269	15.9044	25.7293	11.7288	11.2253	12.8464	NaN	9.26478	NaN	6.61551	NaN	6.52633	NaN	NaN
Rai1	Rai1 protein;Retinoic acid induced 1;Retinoic acid-induced protein 1;Isoform 2 of Retinoic acid-induced protein 1	A6H6H9_MOUSE;Q5QGZ6_MOUSE;RAI1_MOUSE;RAI1_MOUSE		205.69	95.4994	269.107	253.771	257.203	248.244	298.393	205.917	206.596	240.785	179.256	252.657	91.1879	316.385	163.818	250.66
Ccdc50	Coiled-coil domain containing 50;Coiled-coil domain containing 50 (Fragment);Coiled-coil domain-containing protein 50;Isoform 3 of Coiled-coil domain-containing protein 50	A6H6M8_MOUSE;F6UK66_MOUSE;CCD50_MOUSE;CCD50_MOUSE		91.9094	92.5976	93.9818	102.361	99.0828	110.652	100.203	94.1039	79.7671	107.472	73.9013	83.813	105.125	103.441	94.731	124.454
Herc3	Hect domain and RLD 3	A6H6S0_MOUSE;Q8CFQ0_MOUSE		513.284	515.92	482.75	479.844	579.525	570.808	564.825	512.908	459.148	480	558.892	526.072	424.058	430.861	414.05	459.743
Bag4	BCL2-associated athanogene 4;BAG family molecular chaperone regulator 4	A6H6S8_MOUSE;BAG4_MOUSE		959.367	918.035	1109.16	1098.61	1078.98	1020.29	1081.64	1059.14	1056.92	1059.59	1145.83	1109.77	1045.18	1036.87	1222.54	1305.55
Dennd4c	DENN domain-containing protein 4C	DEN4C_MOUSE		474.053	498.789	427.915	470.732	456.711	512.755	430.799	437.242	450.391	410.296	440.113	424.89	461.376	462.087	449.725	435.252
Ptprn	Protein tyrosine phosphatase receptor type N;MKIAA4064 protein (Fragment);Receptor-type tyrosine-protein phosphatase-like N;Protein tyrosine phosphatase, receptor type, N (Fragment)	A6MDD2_MOUSE;Q5DTQ3_MOUSE;PTPRN_MOUSE;Q6NVE2_MOUSE		519.956	499.975	426.09	471.456	331.68	372.904	335.154	325.433	239.909	238.144	279.963	282.917	363.3	380.105	400.43	400.279
Cd109	CD109 antigen	A6MDD3_MOUSE;CD109_MOUSE		NaN	NaN	NaN	NaN	NaN	118.268	NaN	91.2881	NaN	NaN	NaN	NaN	172.316	134.626	97.8677	85.4777
Ripor2	Rho family-interacting cell polarization regulator 2	A6PW28_MOUSE		232.955	220.454	201.422	206.833	177.147	171.571	171.225	166.84	147.441	140.331	127.367	130.839	173.476	168.594	197.874	170.873
Arhgap31	Rho GTPase-activating protein 31;CDC42 GTPase-activating protein	RHG31_MOUSE;B2RSI0_MOUSE		107.625	107.01	94.1739	92.4501	115.138	113.115	110.018	93.3856	105.648	107.281	108.177	101.474	103.78	111.208	103.218	111.29
Cage1	Cancer antigen 1 (Fragment);Cancer-associated gene 1 protein homolog	A6X912_MOUSE;CAGE1_MOUSE		2797.03	2241.15	2093.34	2057.82	2055.48	1945.29	1817.32	1941.89	2208.02	1632.47	1565.25	1325.02	2040.1	2076.04	1284.17	1460.78
Fermt2	Fermitin family member 2 (Fragment)	A6X940_MOUSE		850.353	1081.47	889.342	849.688	1292.21	1399.72	1411.35	1209.81	795.491	769.38	1250.81	976.847	1143.04	1094.77	1027.59	894.146
Fnip2	Fnip2 protein (Fragment);Folliculin interacting protein 2;Folliculin-interacting protein 2	A7E1X7_MOUSE;D3YUC5_MOUSE;FNIP2_MOUSE		51.5998	53.0199	78.6609	66.5354	56.5561	NaN	38.6467	54.8856	50.567	41.6672	52.3515	40.8597	47.8681	49.3397	47.2048	24.3707
Pklr	Pyruvate kinase;Pyruvate kinase;Pyruvate kinase;Pyruvate kinase PKLR;Pyruvate kinase (Fragment)	A7MCU9_MOUSE;E9Q509_MOUSE;G3X925_MOUSE;KPYR_MOUSE;Q3UEI4_MOUSE		57.2787	63.7859	18.5163	NaN	49.3484	50.0556	16.7039	29.0415	36.5968	28.0788	33.8739	33.5013	38.7362	50.1825	37.2333	32.9582
Gmfb	Glia maturation factor;Glia maturation factor beta	A7VJ98_MOUSE;GMFB_MOUSE		175.084	136.208	201.202	194.496	157.854	169.792	197.35	206.208	162.455	173.891	213.406	208.3	176.844	164.285	205.395	209.014
Cryl1	L-gulonate 3-dehydrogenase;Lambda-crystallin homolog;3-hydroxyacyl-CoA dehydrogenase NAD binding domain-containing protein	A7VMV2_MOUSE;CRYL1_MOUSE;Q9D221_MOUSE		46.4649	37.0098	48.8816	30.4023	54.4545	66.389	43.5435	24.673	74.8245	69.6011	51.9665	48.9118	51.7954	58.4177	16.3111	26.2197
Ankrd54	Lyn-interacting ankyrin repeat protein;Ankyrin repeat domain-containing protein 54	A7YB12_MOUSE;ANR54_MOUSE		205.989	199.158	161.519	174.88	187.525	207.981	181.238	179.17	138.442	138.423	169.539	131.528	187.566	174.508	177.94	206.244
Prickle2	Prickle planar cell polarity protein 2;Prickle-like protein 2	A7YQ68_MOUSE;PRIC2_MOUSE		125.574	166.634	136.053	125.103	115.896	104.532	102.281	116.599	71.0749	61.9311	60.5618	62.0353	64.2758	72.4539	86.873	81.9529
Cpt1a	Acyltransferase;Carnitine O-palmitoyltransferase 1, liver isoform;Uncharacterized protein;Carnitine palmitoyltransferase 1a, liver	A8ASF5_MOUSE;CPT1A_MOUSE;Q3UGT1_MOUSE;Q7TQD5_MOUSE		111.293	107.248	105.282	119.103	81.6382	120.83	69.0195	71.5287	NaN	57.0332	60.4938	50.4022	67.9731	85.6949	88.6566	95.0026
Atraid	H1E6 protein;All-trans retinoic acid induced differentiation factor (Fragment);All-trans retinoic acid induced differentiation factor (Fragment);All-trans retinoic acid-induced differentiation factor	A8C1S6_MOUSE;F6RYG0_MOUSE;G3UXG8_MOUSE;ARAID_MOUSE		8.74073	4.81976	3.11258	NaN	NaN	NaN	6.00613	NaN	9.2412	3.387	7.85741	6.9635	12.1449	20.1789	8.83774	10.8703
Creld1	protein disulfide-isomerase;Protein disulfide isomerase Creld1	A8C1T7_MOUSE;CREL1_MOUSE		380.054	401.698	320.158	391.638	299.384	340.916	279.689	300.044	401.42	455.646	446.421	438.876	446.604	417.346	397.943	357.639
Thada	tRNA (32-2'-O)-methyltransferase regulator THADA	THADA_MOUSE		287.683	280.508	266.828	269.609	285.335	306.158	274.253	278.902	307.375	300.853	311.402	316.829	289.451	268.458	349.173	346.446
Hbb-bs	Beta-globin	A8DUK4_MOUSE		2239.78	2045.41	1736.86	1644.1	3271.07	3290.82	3437.64	3262.79	11961.1	11999.2	10786.8	10786.7	13368.1	13742.9	12368	11044.1
Slc9a9	Sodium/hydrogen exchanger;Sodium/hydrogen exchanger;Sodium/hydrogen exchanger;Sodium/hydrogen exchanger 9	A8E634_MOUSE;Q3T994_MOUSE;Q499E9_MOUSE;SL9A9_MOUSE		74.0362	62.1714	51.0841	75.1952	54.6883	NaN	58.3151	51.4327	101.489	92.3801	64.4807	52.9987	59.0803	50.3128	83.5717	104.986
Ywhag	14-3-3 protein gamma	A8IP69_MOUSE;1433G_MOUSE		29585.8	30377.6	33140.3	34718.6	36248.4	35897.5	36185.9	37015.9	29674.5	31274.9	36431.1	35284.3	37257.1	37198.2	33044.4	33596.8
Sec14l1	SEC14-like protein 1;Isoform 3 of SEC14-like protein 1	S14L1_MOUSE		922.029	955.33	832.796	850.422	1079.93	1014.9	974.695	1002.77	903.32	835.899	975.358	1000.91	924.464	912.269	814.763	823.249
Ints11	Integrator complex subunit 11	A8Y5J3_MOUSE;INT11_MOUSE		200.351	180.576	187.672	178.871	189.596	187.336	180.965	186.463	181.493	181.163	186.524	162.876	161.144	164.067	192.345	212.911
Med18	Mediator of RNA polymerase II transcription subunit 18 (Fragment);Mediator of RNA polymerase II transcription subunit 18	A8Y5Q6_MOUSE;MED18_MOUSE		NaN	61.977	66.5311	72.9535	67.4672	65.4161	106.722	65.8948	80.4054	71.9794	65.1462	72.6748	60.81	74.6097	72.6205	65.4507
Pars2	proline--tRNA ligase;Probable proline--tRNA ligase, mitochondrial	A8Y5T6_MOUSE;SYPM_MOUSE		247.531	232.739	215.45	205.955	156.553	153.344	133.022	134.51	217.856	222.928	211.246	188.938	186.938	190.134	241.721	203.214
Cul7	Cullin 7;Cullin-7	A9C491_MOUSE;CUL7_MOUSE		590.591	613.86	447.714	429.812	530.044	622.602	482.243	451.607	359.51	393.778	326.814	312.755	474.332	466.878	404.502	445.913
Serinc1	Serine incorporator 1	A9CLV6_MOUSE;SERC1_MOUSE		421.513	459.143	356.998	413.338	387.877	407.191	387.27	439.56	308.696	300.07	286.861	283.919	317.341	329.957	378.206	383.641
Lingo1	Leucine-rich repeat and immunoglobulin-like domain-containing nogo receptor-interacting protein 1	A9DA50_MOUSE;LIGO1_MOUSE		410.318	400.155	358.994	367.495	316.868	332.249	330.804	343.652	425.4	420.165	413.273	345.083	411.002	344.094	389.335	403.515
Fkbp1b	peptidylprolyl isomerase;Peptidyl-prolyl cis-trans isomerase FKBP1B	A9E3L2_MOUSE;FKB1B_MOUSE		140.128	157.03	304.15	321.735	350.681	365.978	194.35	234.927	303.347	344.288	313.71	292.233	312.002	274.99	194.955	298.527
Ranbp10	Ran binding protein 10;Ran-binding protein 10	A9UGK3_MOUSE;RBP10_MOUSE		635.834	634.436	522.659	521.33	643.979	626.173	616.522	621.853	649.473	668.434	536.239	538.728	660.09	628.79	645.776	641.598
Vwa5b1	von Willebrand factor A domain-containing protein 5B1;von Willebrand factor A domain containing 5B1	VW5B1_MOUSE;B1AZ81_MOUSE		154.949	172.586	139.606	130.13	104.702	104.693	102.214	87.356	82.209	95.7653	95.5213	93.1098	132.959	142.462	111.803	95.1761
Nudcd3	NudC-like protein;NudC domain-containing protein 3	B0FTY3_MOUSE;NUDC3_MOUSE		1943.13	1940.45	1852.31	1876.25	1817.04	1883.6	1822.96	1767.76	1944.23	1962.35	1875.38	1862.95	1913.17	1886.26	1887.67	1989.54
Atp6v1b2	ATPase H+ transporting lysosomal V1 subunit B2 (Fragment)	B0LAC8_MOUSE		120.888	108.507	117.141	89.1842	113.615	140.403	93.3665	107.259	153.114	186.76	145.545	95.7687	107.071	99.5293	80.1428	91.583
Arl6ip1	ADP-ribosylation factor-like 6 interacting protein 1 (Fragment);ADP-ribosylation factor-like protein 6-interacting protein 1;ADP-ribosylation factor-like protein 6-interacting protein 1;ADP-ribosylation factor-like protein 6-interacting protein 1 (Fragment);ADP-ribosylation factor-like protein 6-interacting protein 1 (Fragment);ADP-ribosylation factor-like 6 interacting protein 1;ADP-ribosylation…	B0LAE4_MOUSE;Q3THR3_MOUSE;Q3TIC7_MOUSE;Q3TQE3_MOUSE;Q3UBA1_MOUSE;Q80ZW9_MOUSE;Q8C1Y9_MOUSE;AR6P1_MOUSE		781.041	784.743	709.825	784.605	758.983	735.495	638.247	582.245	772.53	690.325	757.905	881.464	718.086	736.403	714.502	685.47
Phf23	PHD finger protein 23 (Fragment);PHD finger protein 23	B0QZH9_MOUSE;PHF23_MOUSE		NaN	NaN	174.46	150.766	41.7266	NaN	101.753	119.848	111.924	106.175	80.8256	80.4395	92.0669	126.055	155.68	181.925
Slc45a1	Solute carrier family 45, member 1;Proton-associated sugar transporter A	B0QZL3_MOUSE;S45A1_MOUSE		NaN	NaN	13.9077	9.94223	NaN	26.5094	26.3052	19.0339	NaN	NaN	NaN	20.8312	22.926	26.8779	NaN	NaN
Rcan3	Regulator of calcineurin 3 (Fragment);Calcipressin-3	B0QZL9_MOUSE;RCAN3_MOUSE		139.61	173.083	192.489	236.59	144.613	170.351	162.362	176.529	160.1	162.704	153.574	157.959	231	225.332	185.192	180.085
Vamp2	Vesicle-associated membrane protein 2	B0QZN5_MOUSE;O35619_MOUSE;VAMP2_MOUSE;Q8CHR4_MOUSE		30805.8	30761.7	29186.6	27734	27144.9	27365.4	27707.3	27564.9	28431.8	29905	34086.4	30861	27834.4	28340.7	23427.7	21663.9
Syngr2;Syngr2;Syngr2;Gm20708;Syngr2	Synaptogyrin 2;Synaptogyrin 2;Synaptogyrin 2;Predicted gene 20708;Synaptogyrin-2	B0QZP8_MOUSE;H3BIZ8_MOUSE;H3BJY1_MOUSE;H3BKF4_MOUSE;SNG2_MOUSE		34.4294	49.8251	47.1825	45.5315	98.7751	79.2184	45.7145	59.3299	40.587	49.2031	47.996	46.2074	109.711	77.7326	75.7933	70.3013
Chp1	Calcineurin B homologous protein 1	B0R091_MOUSE;CHP1_MOUSE		275.942	229.49	228.893	227.845	230.748	255.666	184.888	206.635	276.141	278.303	282.195	278.115	267.22	309.381	277.608	290.128
Rabepk	Rab9 effector protein with kelch motifs	B0R0S4_MOUSE;RABEK_MOUSE		620.05	623.106	631.568	603.294	712.598	688.108	662.635	720.998	602.078	633.662	748.654	681.046	704.302	705.266	758.353	836.1
Ptprs	Receptor-type tyrosine-protein phosphatase S;Isoform 6 of Receptor-type tyrosine-protein phosphatase S	PTPRS_MOUSE		119.834	118.397	95.9151	89.4278	81.0621	91.7755	80.0141	82.3912	90.8623	105.524	80.9083	91.4363	109.637	112.711	111.991	105.052
Dmxl2	Dmx-like 2 (Fragment)	B0V2P6_MOUSE		103.72	81.3204	77.286	88.1276	74.6628	67.1245	109.841	115.203	285.352	356.578	109.93	101.83	317.714	284.048	57.1055	45.4692
Mpped2	Metallophosphoesterase domain containing 2 (Fragment);Metallophosphoesterase domain containing 2;Metallophosphoesterase MPPED2	B1APT1_MOUSE;B1APT2_MOUSE;MPPD2_MOUSE		202.592	253.654	210.801	211.158	145.835	146.789	140.318	153.24	128.32	132.857	150.451	159.813	210.576	211.468	284.295	269.089
5031439G07Rik	RIKEN cDNA 5031439G07 gene	B1APX2_MOUSE		717.803	760.6	819.056	891.091	1021.06	926.123	899.882	858.522	743.826	694.015	841.111	832.512	945.112	913.258	948.711	972.121
Krt36	Keratin, type I cuticular Ha6	KRT36_MOUSE		NaN	NaN	NaN	NaN	NaN	NaN	NaN	NaN	614.257	552.491	493.579	397.816	281.283	193.814	NaN	NaN
Krt15	Keratin 15;Keratin, type I cytoskeletal 15	B1AQ77_MOUSE;K1C15_MOUSE		659.512	729.313	154.535	180.896	475.245	429.221	360.089	395.66	345.688	336.139	255.619	267.134	411.181	390.157	151.893	128.703
Krt19	Keratin, type I cytoskeletal 19;Keratin, type I cytoskeletal 19	B1AQ78_MOUSE;K1C19_MOUSE		421.183	NaN	NaN	NaN	571.521	651.115	257.204	312.588	NaN	NaN	NaN	NaN	261.56	358.89	NaN	NaN
Rab34;Rab34;;Rab34	RAB34, member RAS oncogene family (Fragment);Rab34;Ras-related protein Rab-34 (Fragment);Ras-related protein Rab-34	B1AQD4_MOUSE;Q0PD20_MOUSE;Q3TV85_MOUSE;RAB34_MOUSE		57.7654	63.3126	72.0568	67.936	52.0033	47.7667	50.478	50.3282	58.993	45.9573	64.0558	68.4518	61.3423	84.8479	88.5501	80.6862
Dusp3	Dual specificity protein phosphatase;Dual specificity protein phosphatase 3	B1AQF4_MOUSE;DUS3_MOUSE		3386.53	3375.09	3668.02	3872.66	4068.35	4234.51	4284.72	4400.45	2802.03	2983.73	3797.22	3740.44	3846.02	4012.06	4023.24	3985.27
Med1	Mediator of RNA polymerase II transcription subunit 1;Mediator of RNA polymerase II transcription subunit 1;Isoform 2 of Mediator of RNA polymerase II transcription subunit 1;Isoform 3 of Mediator of RNA polymerase II transcription subunit 1;Isoform 4 of Mediator of RNA polymerase II transcription subunit 1	B1AQH6_MOUSE;MED1_MOUSE;MED1_MOUSE;MED1_MOUSE;MED1_MOUSE		98.386	103.096	91.6224	75.2271	94.5516	85.5927	80.6315	76.4926	89.2761	80.4307	72.04	65.3528	61.4688	79.7574	79.7166	104.232
Ptprt	protein-tyrosine-phosphatase;Receptor-type tyrosine-protein phosphatase T;Isoform 2 of Receptor-type tyrosine-protein phosphatase T;Isoform 3 of Receptor-type tyrosine-protein phosphatase T;Isoform 4 of Receptor-type tyrosine-protein phosphatase T;Isoform 5 of Receptor-type tyrosine-protein phosphatase T	B1AQN2_MOUSE;PTPRT_MOUSE;PTPRT_MOUSE;PTPRT_MOUSE;PTPRT_MOUSE;PTPRT_MOUSE		91.9252	92.0564	91.1164	79.0668	63.7875	79.3507	73.5084	59.882	87.3764	97.2707	72.896	89.0182	79.8363	80.8132	78.0968	80.3609
Lgals9	Galectin;Galectin;Galectin-9;Isoform 2 of Galectin-9;Isoform 3 of Galectin-9	B1AQR8_MOUSE;G3X9T7_MOUSE;LEG9_MOUSE;LEG9_MOUSE;LEG9_MOUSE		NaN	110.179	60.2303	53.186	NaN	70.595	59.3846	57.5228	68.5921	69.0627	77.4798	75.598	101.691	88.9034	80.1124	91.667
Mapt	Microtubule-associated protein	B1AQW2_MOUSE		2481	685.307	2329.68	3248.7	2484.4	1854.26	2961.33	3219.2	3600.72	3580.1	3338.32	4000.31	3308.4	3353.01	4464.43	3164.78
Srcin1	SRC kinase signaling inhibitor 1	B1AQX6_MOUSE;B1AQX7_MOUSE		98.7887	83.4846	57.8473	62.7475	153.754	192.457	68.1239	123.804	68.9353	88.2752	41.5789	NaN	NaN	72.1672	NaN	NaN
Arhgap23	Rho GTPase activating protein 23;Rho GTPase-activating protein 23	B1AQY2_MOUSE;RHG23_MOUSE		572.514	604.794	519.382	508.213	583.577	612.937	578.976	594.467	488.629	472.127	464.159	473.185	500.487	495.337	440.949	436.135
Septin8	Septin-8	B1AQZ0_MOUSE		1096.73	1162.1	1071.77	1045.72	1141.69	1158.24	1148.68	1092.83	1525.9	1460.94	1582.7	1576.73	1266.51	1301.41	1341.06	1324.08
Kif3a	Kinesin-like protein;Kinesin-like protein KIF3A;Kinesin-like protein;Kinesin-like protein	B1AQZ2_MOUSE;KIF3A_MOUSE;Q3TET1_MOUSE;Q3UI47_MOUSE		3256.66	3112.41	3081.14	3125.11	3367.06	3269.74	3267.83	3284.53	3033.27	3054.01	3305.08	3258.91	3242.64	3246.03	3052.15	2906.62
Mllt6	Myeloid/lymphoid or mixed-lineage leukemia; translocated to, 6;Myeloid/lymphoid or mixed-lineage leukemia; translocated to, 6;MLLT6	B1AR09_MOUSE;B1AR10_MOUSE;Q8VHB4_MOUSE		49.3571	67.2125	29.5537	42.2772	52.6494	50.6611	37.065	38.9926	34.3971	43.2423	35.9015	26.5028	27.8207	44.425	39.4778	42.5319
Cisd3	CDGSH iron-sulfur domain-containing protein 3, mitochondrial;CDGSH iron sulfur domain 3;Cisd3 protein (Fragment);CDGSH iron sulfur domain 3	CISD3_MOUSE;B2RWE3_MOUSE;B3DFI8_MOUSE;Z4YKM2_MOUSE		206.127	164.821	124.035	126.038	120.866	99.8152	127.586	124.895	127.79	130.675	121.4	145.082	142.64	184.599	142.133	132.599
Chd3	DNA helicase;DNA helicase;DNA helicase (Fragment)	B1AR17_MOUSE;E9Q614_MOUSE;F7C528_MOUSE		52.4208	46.9329	33.4055	46.6688	53.2257	59.8911	37.9714	47.5204	33.7711	45.7598	46.4085	46.4287	49.2168	42.6088	54.7073	41.3185
Bcas3	BCAS3 microtubule associated cell migration factor	B1AR74_MOUSE		127.925	132.515	117.232	108.433	158.79	139.933	139.143	148.24	103.484	125.618	132.041	116.581	134.104	141.671	92.6329	127.41
Slc39a11	Zinc transporter ZIP11 (Fragment);Solute carrier family 39 (metal ion transporter), member 11 (Fragment);Zinc transporter ZIP11;Isoform 2 of Zinc transporter ZIP11;Isoform 3 of Zinc transporter ZIP11	B1ARC2_MOUSE;B1ARC5_MOUSE;S39AB_MOUSE;S39AB_MOUSE;S39AB_MOUSE		68.8783	50.2952	52.7053	63.0571	NaN	NaN	38.5363	31.0636	67.8066	57.1037	68.5835	NaN	61.9481	51.7529	47.2651	86.8173
Rad51d;Rad51d;Rad51d;Rad51d;Rad51d;Rad51d;Rad51d;Rad51d;Rad51d;Rad5113;TRAD/RAD51L3	RAD51 paralog D;RAD51D transcript variant delta 9,10;RAD51D transcript variant delta 10;RAD51 paralog D;DNA repair protein RAD51 homolog 4;RecA family profile 1 domain-containing protein;Trad-d2;Trad-d1;Trad-d6;RAD5113;Trad	B1ARD4_MOUSE;B5LBC3_MOUSE;B5LBC4_MOUSE;E9QAG0_MOUSE;RA51D_MOUSE;Q3UGT8_MOUSE;Q9EP87_MOUSE;Q9EPA9_MOUSE;Q9EPC0_MOUSE;Q9EQL4_MOUSE;Q9EQS6_MOUSE		18.3844	NaN	11.2017	26.4879	16.106	22.0606	23.6057	20.9014	13.682	18.4343	21.6567	24.3298	14.2846	NaN	29.9807	26.4368
Vps13d	Vacuolar protein sorting 13D	B1ART2_MOUSE		350.679	334.389	308.378	315.305	306.418	316.039	285.644	281.499	330.286	325.387	313.528	316.128	296.173	300.33	305.924	311.111
Macf1	Microtubule-actin crosslinking factor 1	B1ARU4_MOUSE		2179.11	2154.46	1824.44	1831.3	1837.23	1879.9	1769.58	1777.64	2092.42	2097.41	1901.48	1941.4	1997.88	2056.76	2096.08	2060.75
Dlgap3	DLG associated protein 3;Disks large-associated protein 3;Disks large-associated protein 3	B1AS06_MOUSE;Q3TY61_MOUSE;DLGP3_MOUSE		1083.13	1137.03	1124.19	1088.49	1137.57	1153.89	1164.84	1118.9	617.175	651.46	609.507	592.312	691.094	684.424	680.332	775.422
Pik3cd	Phosphatidylinositol-4,5-bisphosphate 3-kinase catalytic subunit delta (Fragment)	B1AS27_MOUSE		NaN	NaN	NaN	NaN	NaN	NaN	24.9455	NaN	40.2091	43.1301	NaN	NaN	NaN	NaN	NaN	NaN
Ssbp3	Single-stranded DNA binding protein 3;Single-stranded DNA-binding protein 3;Isoform 2 of Single-stranded DNA-binding protein 3	B1AS37_MOUSE;SSBP3_MOUSE;SSBP3_MOUSE		253.623	266.315	284.288	293.982	219.138	238.726	324.265	281.056	308.591	325.36	318.816	291.44	245.592	261.897	478.64	466.931
Mob3c	MOB1, Mps One Binder kinase activator-like 2C (Yeast);Mobkl2c protein (Fragment);MOB kinase activator 3C	B1ASD4_MOUSE;Q499W3_MOUSE;MOB3C_MOUSE		NaN	NaN	10.4453	13.0948	17.131	22.8692	14.9135	21.4517	20.8364	14.3478	NaN	20.2568	27.0177	11.5314	12.6561	15.3365
Ube2j2	E2 ubiquitin-conjugating enzyme;Ubiquitin-conjugating enzyme E2 J2	B1ASK8_MOUSE;UB2J2_MOUSE		216.636	196.925	156.702	172.701	168.227	175.127	170.311	178.46	215.803	239.673	161.459	172.469	163.051	181.949	212.281	191.408
Jak1	Tyrosine-protein kinase	B1ASP2_MOUSE;Q3URU8_MOUSE		208.687	219.55	193.205	191.14	230.541	232.73	242.768	223.458	196.722	213.909	180.923	191.329	225.576	241.154	231.492	217.295
Mast2	non-specific serine/threonine protein kinase	B1AST7_MOUSE;B1AST8_MOUSE		702.145	664.371	629.21	646.269	626.15	603.613	572.895	559.509	439.816	474	364.589	424.496	438.576	412.59	530.587	545.093
Tlk2	Tousled-like kinase 2 (Arabidopsis);Serine/threonine-protein kinase tousled-like 2	B1ASU9_MOUSE;TLK2_MOUSE		61.2432	54.7361	43.4766	27.3987	50.5437	83.6713	61.2909	40.7641	55.4963	73.7017	42.9261	32.4353	51.9308	63.3541	77.0442	67.817
Tab3	Mitogen-activated protein kinase kinase kinase 7 interacting protein 3;TGF-beta-activated kinase 1 and MAP3K7-binding protein 3	B1ASY9_MOUSE;TAB3_MOUSE		2427.01	2384.19	2186.01	2203.45	2476.72	2408.89	2413.08	2468.74	1962.03	2055.86	2080.63	1979.49	1857.28	2095.52	1910.3	2160.91
Gk	glycerol kinase	B1ASZ3_MOUSE		1588.41	1606.88	1487.7	1502.68	1470.66	1510.63	1431.3	1444.97	1464.83	1454.69	1609.19	1637.97	1513.86	1529.58	1609.97	1711.99
Msi2	Musashi RNA-binding protein 2 (Fragment)	B1AT10_MOUSE		199.741	137.105	155.484	226.623	233.714	361.639	203.636	217.788	121.789	NaN	214.698	175.72	188.136	229.899	144.422	227.73
Amz2	Archaemetzincin-2	B1AT59_MOUSE;AMZ2_MOUSE		159.586	193.44	150.741	157.071	181.075	161.033	122.641	154.191	137.73	143.457	153.716	181.064	165.566	143.619	115.583	138.52
Prpsap1	Phosphoribosyl pyrophosphate synthetase-associated protein 1	B1AT82_MOUSE		2470.35	2558.82	2192.86	2189.15	2577.94	2553.47	2644.61	2545.87	2648.75	2764.88	2552.5	2674.72	2627.69	2664.75	3077.43	2945.59
Mtmr3	Phosphatidylinositol-3-phosphate phosphatase	B1ATD5_MOUSE;Q66I45_MOUSE		409.346	399.988	398.494	411.958	447.424	405.555	434.321	440.516	406.334	402.907	391.527	405.087	318.934	325.444	354.687	365.531
Aldh3a2	Aldehyde dehydrogenase;Aldehyde dehydrogenase;Aldehyde dehydrogenase family 3 member A2;Aldehyde dehydrogenase	B1ATI0_MOUSE;B1AV77_MOUSE;AL3A2_MOUSE;Q8C3C9_MOUSE		533.626	569.089	369.565	412.034	409.833	396.737	383.87	356.387	664.034	634.001	526.738	549.605	569.107	598.974	599.088	514.137
Krt32	Keratin 32;Keratin, type I cuticular Ha2	B1ATJ5_MOUSE;K1H2_MOUSE		NaN	NaN	NaN	NaN	NaN	NaN	NaN	NaN	87.701	91.1726	NaN	NaN	154.833	157.524	NaN	NaN
[truncated: 6,991 more rows]

## Sheet: Input 7>15
Ring1		FC>1 AND ttest<=0.25		Included:
Vps52				> query_1 (1905)
Pml		Query parameters		ENSMUSG00000024325 (Ring1)
[truncated: 2,067 more rows]

## Sheet: gProfiler_mmusculus_7-31-20 (3)
source	term_name	term_id	highlighted	adjusted_p_value	negative_log10_of_adjusted_p_value	term_size	query_size	intersection_size	effective_domain_size	intersections
[truncated: 371 more rows]

[truncated: 2 more sheets: Input 15>7, gProfiler_mmusculus_7-31-2024_5]
